# Supplementary material for: Single-Cell Sequencing of Lung Macrophages and Monocytes Reveals Novel Therapeutic Targets in COPD
Source: MDPI journal article supplement (doi:10.3390/cells12242771), 2023-12-05
Supplement: s1 [file s1]

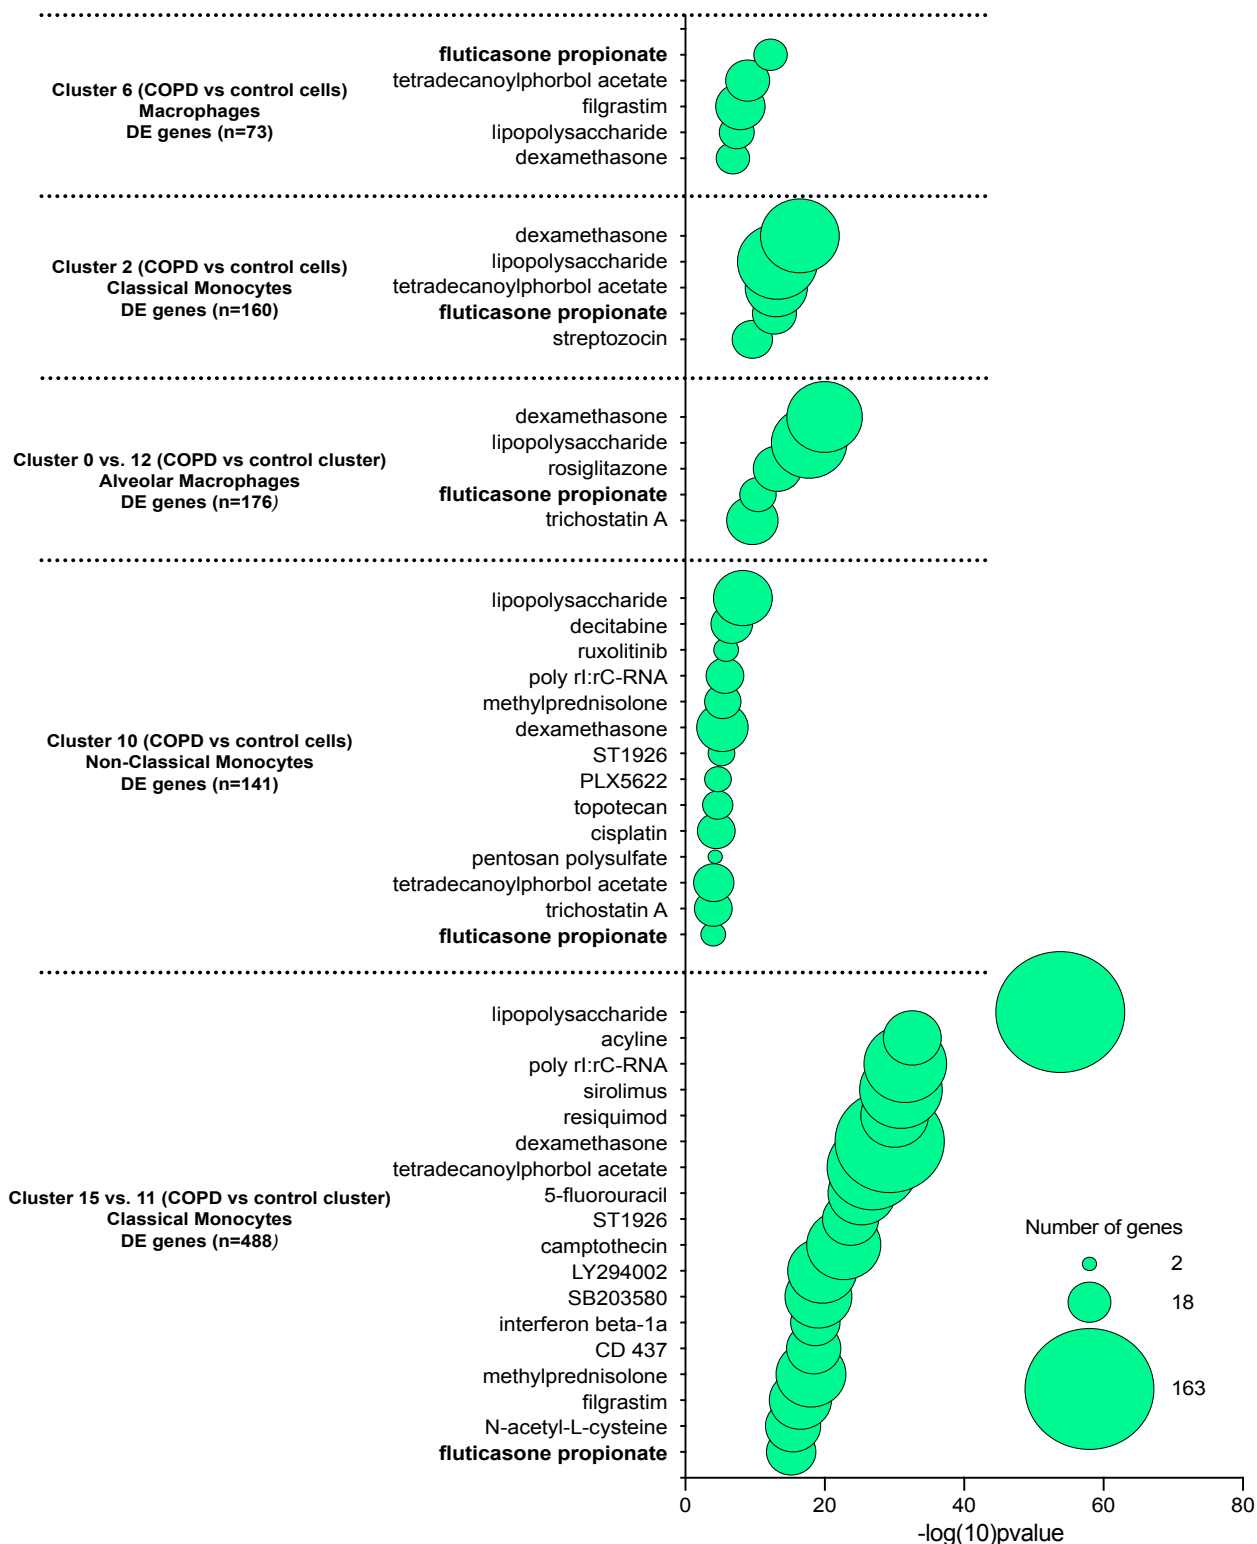

Supplementary Fig. 2. Top Biological and chemical drug targets for differentially expressed genes in mixed (COPD+control) and COPD-predominant clusters as predicted by Ingenuity Pathway Analysis.
