# Supplementary material for: Single-Cell Sequencing of Lung Macrophages and Monocytes Reveals Novel Therapeutic Targets in COPD
Source: MDPI journal article supplement (doi:10.3390/cells12242771), 2023-12-05
Supplement: s1 [file s1]

A

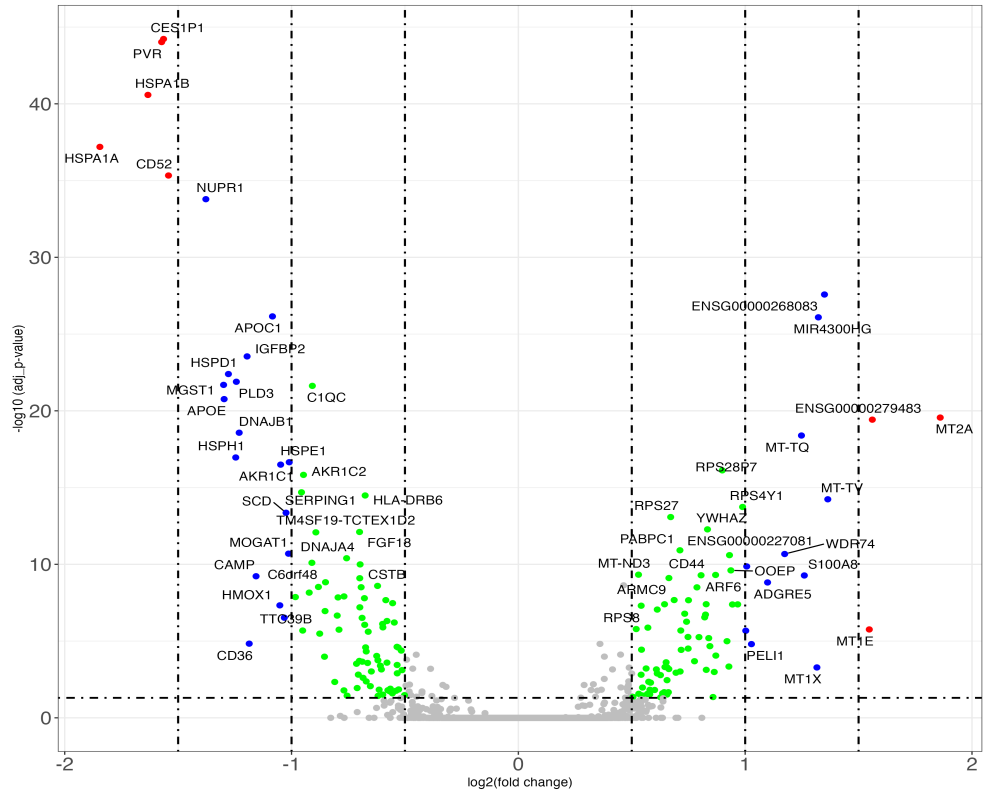

B

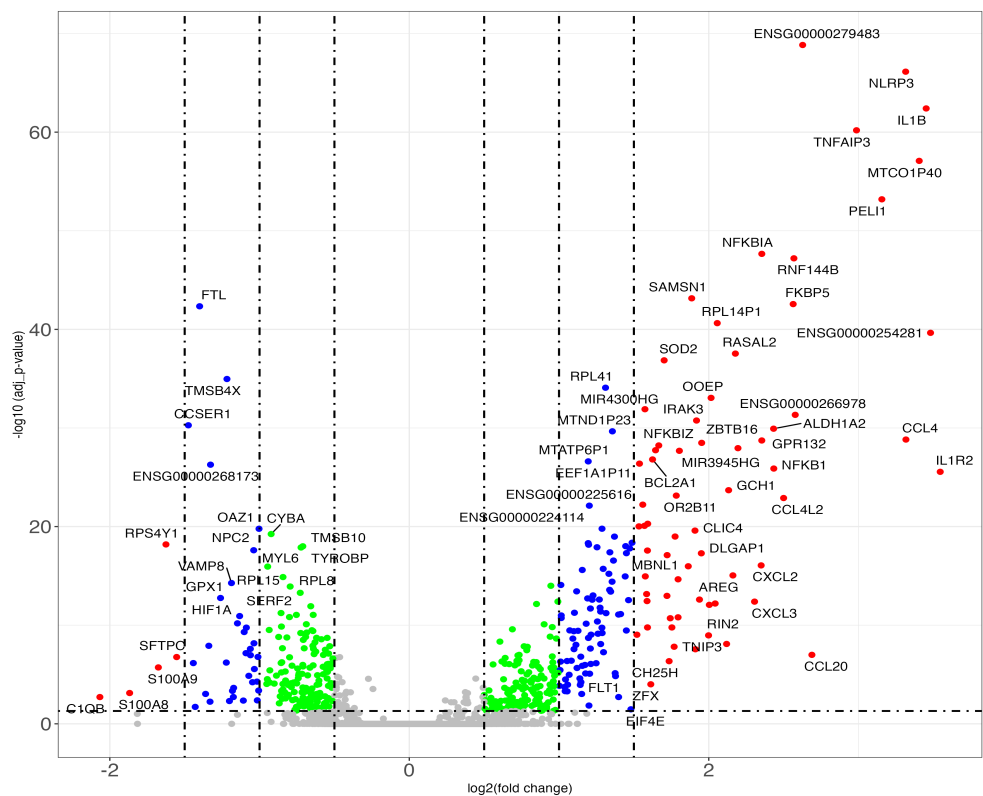

Fig.S3. Volcano plots of DE analysis. Grey dots represent insignificant genes that either has adjusted p-values larger than 0.05 or  $|\log_2FC| < 0.5$ . For genes with significant adjusted p-values (less than 0.05), we use three colors to represent their magnitude of change. Red denotes the gene with  $|\log_2FC| > 1.5$ , Blue stands for the gene which  $0.5 < |\log_2FC| \leq 1.5$ . Green represents for the gene with  $0.5 < |\log_2FC| \leq 1$ . (A) The DE analysis result of cluster 0 versus cluster 12. (B) The DE analysis result of cluster 15 versus cluster 11.
