# Supplementary material for: Single-Cell Sequencing of Lung Macrophages and Monocytes Reveals Novel Therapeutic Targets in COPD
Source: MDPI journal article supplement (doi:10.3390/cells12242771), 2023-12-05

FKBP5

8

6

4

Pre

Post

$p = 0.012$

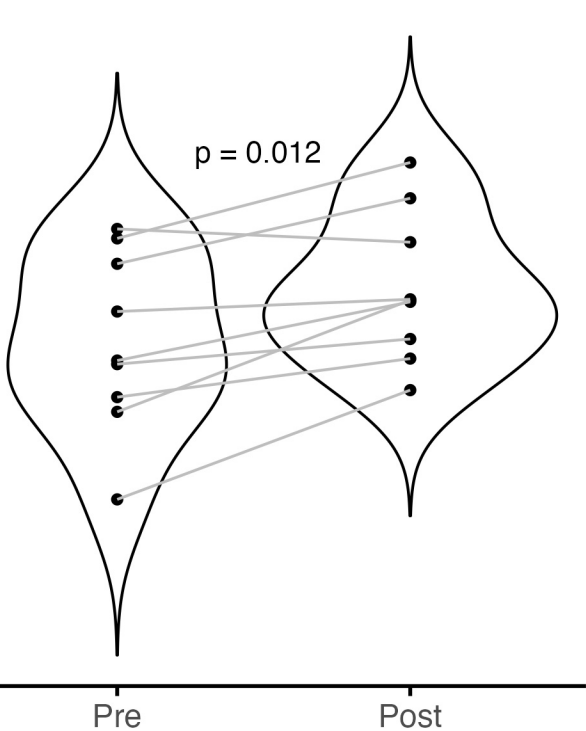

SLAMF1

7.5

5.0

2.5

0.0

-2.5

Pre

Post

$p = 0.027$

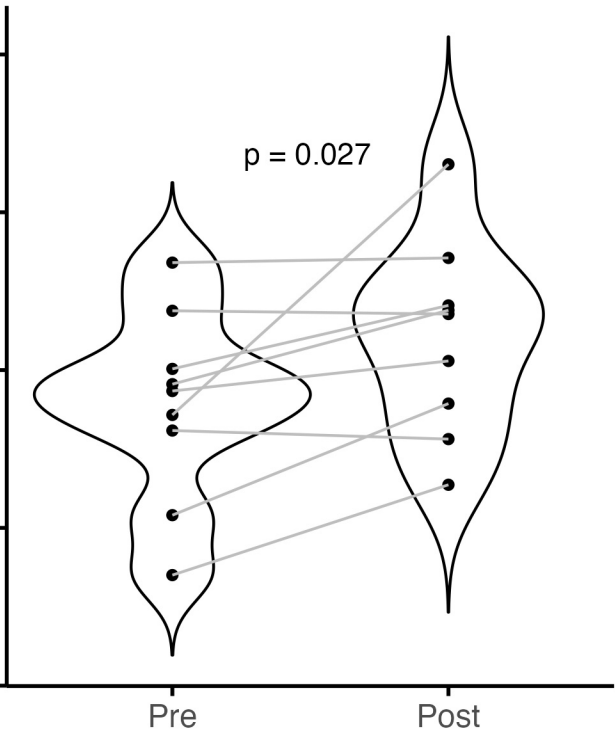

THBS1

10

5

Pre

Post

$p = 0.039$

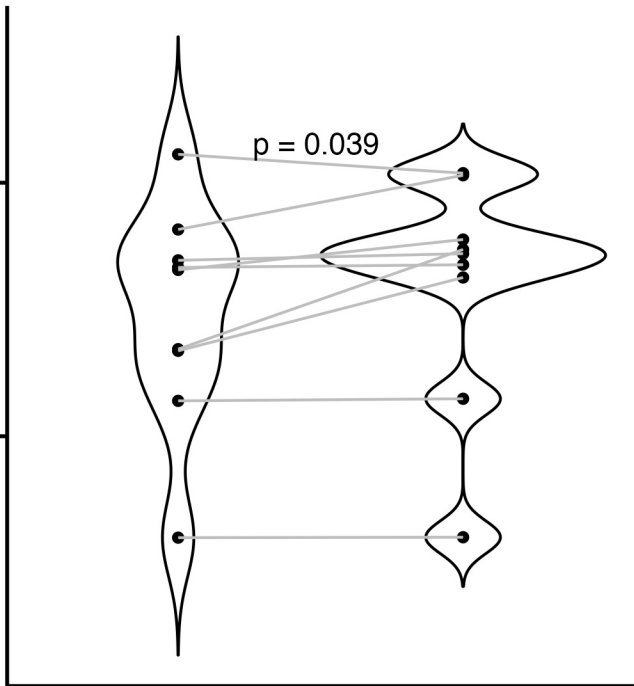

WARS

12  
11  
10  
9  
8

$p = 0.0039$

Pre

Post

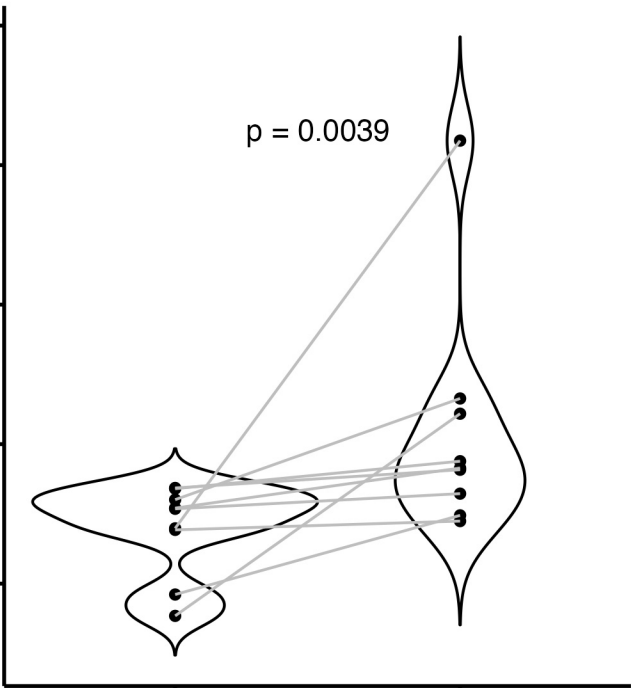

C1QB

12

11

10

Pre

Post

$p = 0.019$

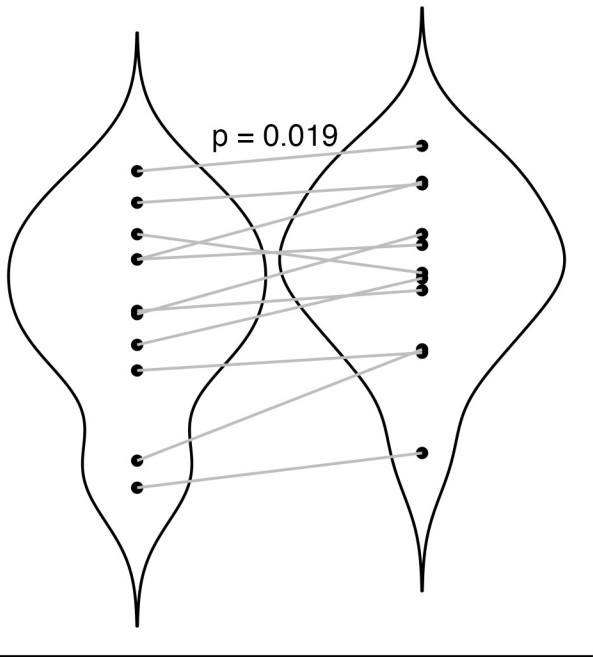

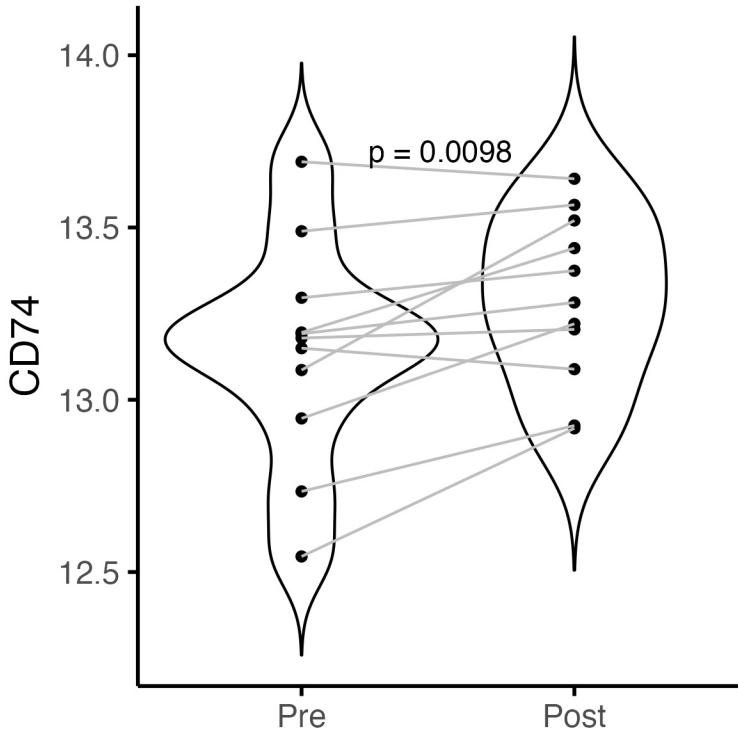

FKBP5

8.0

7.5

7.0

6.5

6.0

$p = 0.0029$

Pre

Post

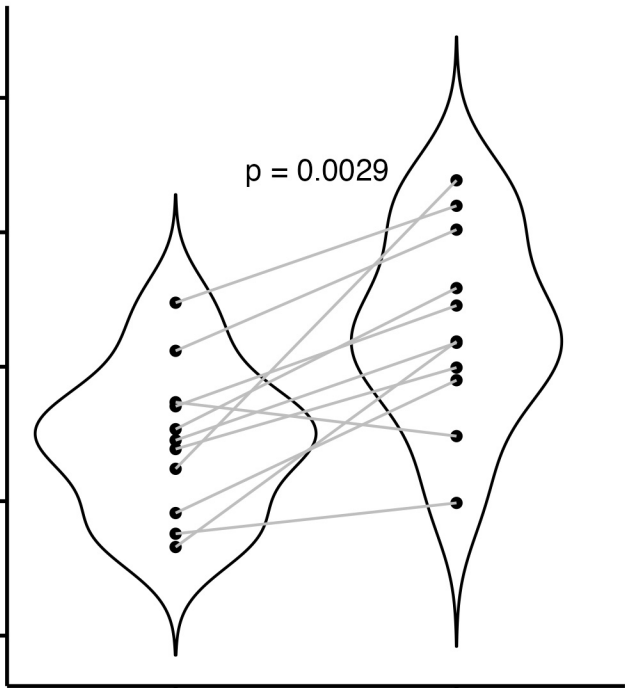

HLA-DPA1

12.0

11.5

11.0

10.5

10.0

Pre

Post

$p = 0.002$

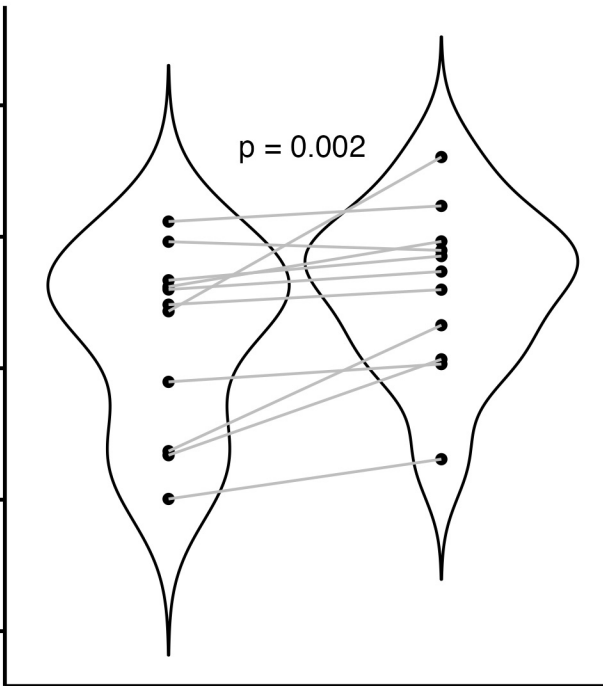



HLA-DPB1

11

10

9

Pre

Post

$p = 0.0029$

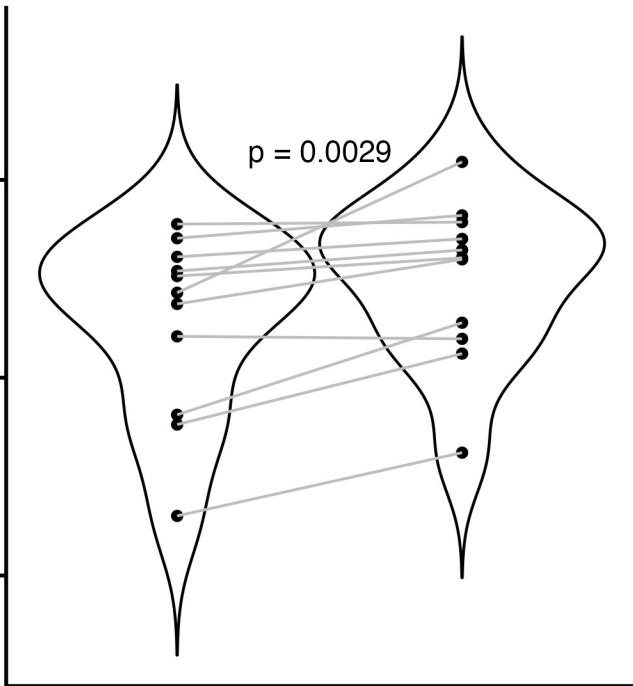

HLA-DQA1

12

11

10

9

8

7

Pre

Post

$p = 0.032$

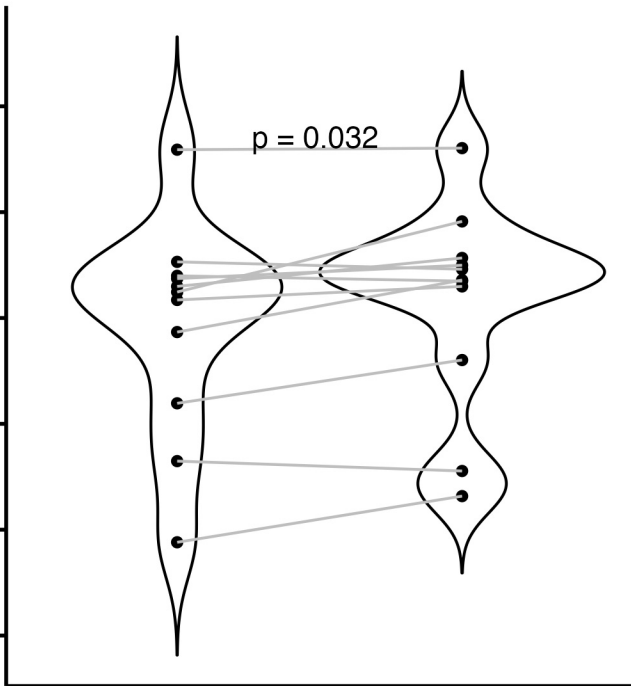

HLA-DRA

13.5

13.0

12.5

12.0

11.5

Pre

Post

$p = 0.0049$

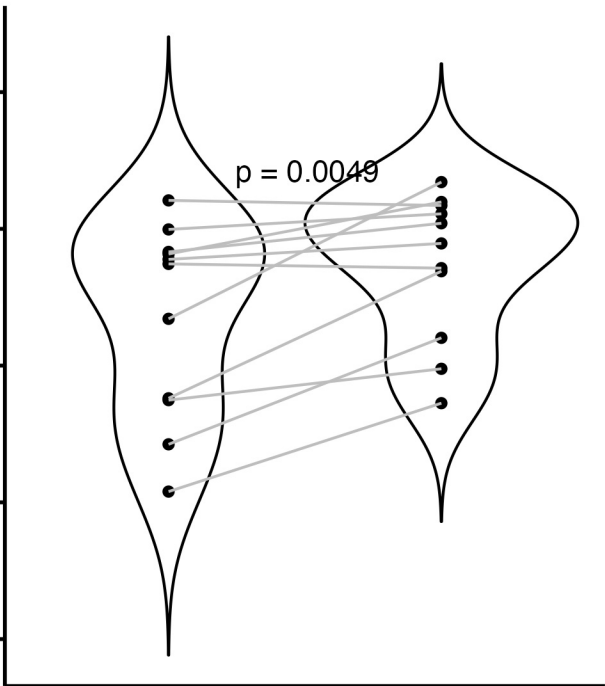

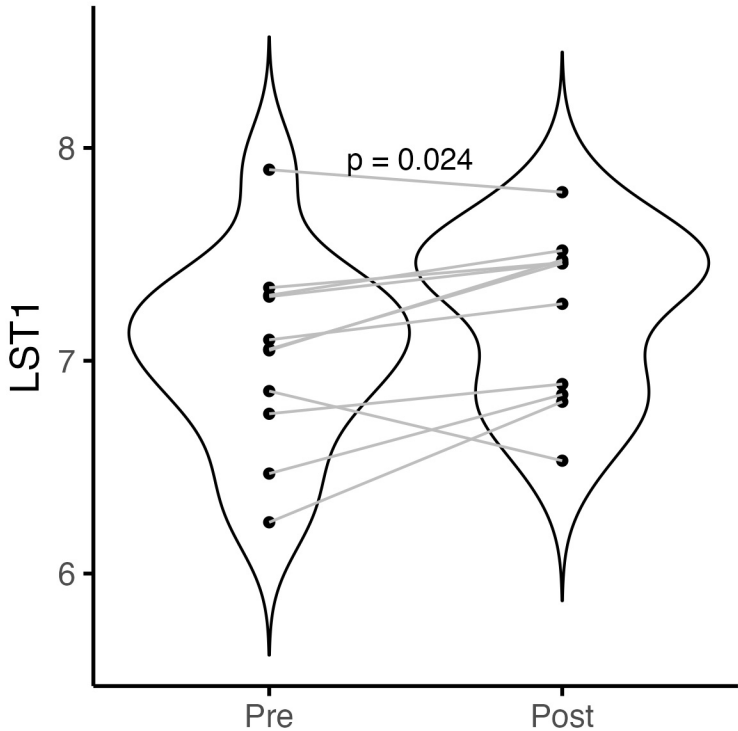

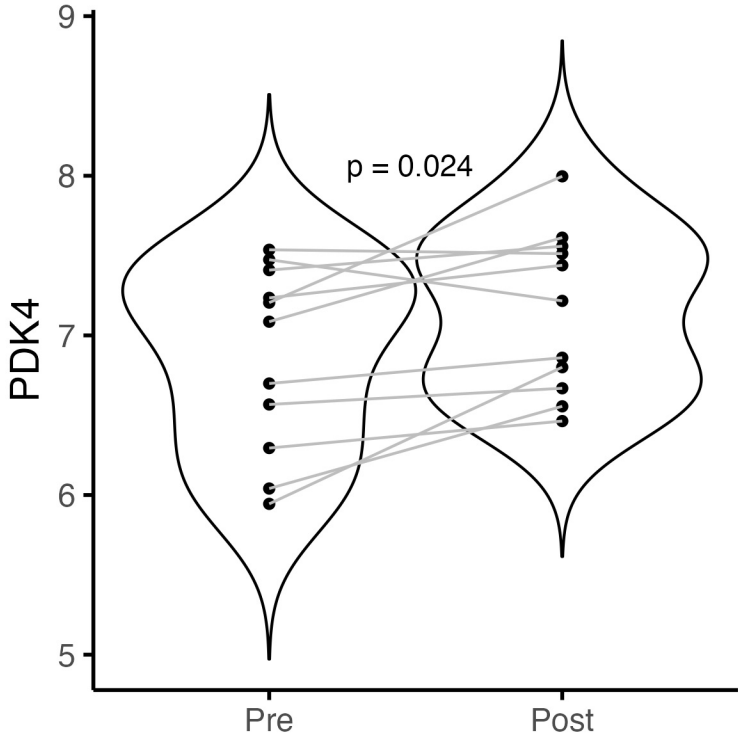

Supplement: s1 [file s1]
