# Supplementary material for: Single-Cell Sequencing of Lung Macrophages and Monocytes Reveals Novel Therapeutic Targets in COPD
Source: Cells. 2023 Dec 5;12(24):2771. doi: 10.3390/cells12242771 (PMC10741950; doi:10.3390/cells12242771)
Supplement: Supplementary file 1 [file cells-12-02771-s001.zip]

Archive with 19 entries (19 files):
- Fig.S1_Biological Functions - Cluster 2- supplement.pdf
- Fig.S2_11.9.22.IPA Fluticasone - supplement.pdf
- Fig.S3_Volcano_plots.pdf
- Fig.S4_ViolinPlots_for significant genes.pdf
- Fig.S5_Sauler cell marker.pdf
- Fig.S6_Sauler_cluster5 marker.pdf
- Fig.S7_ pseudo-time analysis only on COPD .pdf
- Fig.S8 Wauters marophage sub types.pdf
- Fig.S9_liegeios Md Mac sub type markers.pdf
- Table S10_cluster_subject.xlsx
- Table S1_COPD vs Ctl clusters IPA ref lfc 0.5 bio functions-FINAL.xlsx
- Table S2_Canonical pathways- Full list.xlsx
- Table S3_ All fluticasone - Upstream regulators lfc 0.5 (bio chem drugs)-FINAL.xlsx
- Table S4 GSEA HALLMARK_012up.csv
- Table S5 GSEA HALLMARK _012down.csv
- Table S6_GO_BP_1511up.csv
- Table S7_GO_BP_1511down.csv
- Table S8_DISARM_baseline_characteristics.xlsx
- Table S9_markers _match.xlsx
