# Supplementary material for: Single-Cell Sequencing of Lung Macrophages and Monocytes Reveals Novel Therapeutic Targets in COPD
Source: Cells. 2023 Dec 5;12(24):2771. doi: 10.3390/cells12242771 (PMC10741950; doi:10.3390/cells12242771)
Supplement: Supplementary file 1 [file cells-12-02771-s001.zip › Table S1_COPD vs Ctl clusters IPA ref lfc 0.5 bio functions-FINAL.xlsx]

## Sheet: Bio Functions 0 vs 12
Categories	Diseases or Functions Annotation	p-value	Predicted Activation State	Activation z-score	Molecules	# Molecules
Cardiovascular System Development and Function,Organismal Development	Angiogenesis	7.06e-09	Decreased	-2.526	APOE,APP,ATP1B3,CAMP,CD36,CD44,CD63,FABP4,FGF18,HMOX1,HRH1,HSPB1,HSPD1,IGFBP2,KLF4,LGALS1,LRRFIP1,MGAT1,MMP2,NCL,POR,PTPN1,RBPJ,RGCC,RND3,S100A8,SERPINB5,STAT3,STXBP2,THBS1,TNFAIP3,YWHAZ	32
Cardiovascular System Development and Function	Development of vasculature	2.49e-08	Decreased	-2.522	APOE,APP,ATP1B3,CAMP,CD36,CD44,CD63,FABP4,FGF18,HMOX1,HPGD,HRH1,HSPB1,HSPD1,IGFBP2,KLF4,LGALS1,LRRFIP1,MGAT1,MMP2,NCL,POR,PTPN1,RBPJ,RGCC,RND3,S100A8,SERPINB5,STAT3,STXBP2,THBS1,TNFAIP3,YWHAZ	33
Cellular Movement,Hematological System Development and Function,Immune Cell Trafficking	Cell movement of antigen presenting cells	1.63e-06	Decreased	-2.43	APOE,APP,CAMP,CD44,CFD,DEFB1,HMOX1,HRH1,LGALS1,PTPN1,S100A8,SERPING1,STAT3,THBS1,TNFAIP3,TREM1	16
Cancer,Cell Death and Survival,Organismal Injury and Abnormalities,Tumor Morphology	Cell death of cancer cells	3.99e-05	Decreased	-2.382	APP,CD44,FGF18,HMOX1,HSPA1A/HSPA1B,HSPA9,LGALS1,PABPC1,RBPJ,RND3,RPS12,RPS4Y1,STAT3	13
Lipid Metabolism,Molecular Transport,Small Molecule Biochemistry	Uptake of lipid	5.03e-06	Decreased	-2.368	AKR1C1/AKR1C2,APOC1,APOE,CAMP,CD36,FABP4,MSR1,PLIN2,THBS1,TTC39B	10
Cardiovascular System Development and Function,Organismal Development	Vasculogenesis	3.76e-09	Decreased	-2.29	APOE,APP,ATP1B3,CAMP,CD36,CD44,CD63,FABP4,HMOX1,HRH1,HSPD1,IGFBP2,KLF4,LGALS1,LRRFIP1,MGAT1,MMP2,POR,PTPN1,RBPJ,RGCC,RND3,S100A8,SERPINB5,STAT3,STXBP2,THBS1,TNFAIP3,YWHAZ	29
Cardiovascular System Development and Function,Cellular Development,Cellular Function and Maintenance,Cellular Growth and Proliferation,Organismal Development,Tissue Development	Endothelial cell development	3.59e-07	Decreased	-2.265	APOE,APP,ATP1B3,CAMP,CD36,CD44,FABP4,HMOX1,HRH1,LGALS1,MMP2,PTPN1,RGCC,S100A8,STAT3,THBS1	16
Cardiovascular System Development and Function,Cellular Development,Cellular Growth and Proliferation	Proliferation of endothelial cell lines	6.52e-05	Decreased	-2.213	LGALS1,MMP2,NCL,STAT3,THBS1,TNFAIP3	6
Cardiovascular System Development and Function,Cellular Development,Cellular Function and Maintenance,Cellular Growth and Proliferation,Organismal Development,Tissue Development	Cell proliferation of vascular endothelial cells	6.68e-06	Decreased	-2.135	ATP1B3,CAMP,CD44,FABP4,HRH1,LGALS1,PTPN1,S100A8,STAT3,THBS1	10
Cardiovascular System Development and Function,Cellular Development,Cellular Function and Maintenance,Cellular Growth and Proliferation,Organismal Development,Tissue Development	Proliferation of endothelial cells	3.52e-07	Decreased	-2.094	APOE,APP,ATP1B3,CAMP,CD36,CD44,FABP4,HMOX1,HRH1,LGALS1,PTPN1,RGCC,S100A8,STAT3,THBS1	15
Cell-To-Cell Signaling and Interaction	Activation of cells	7.37e-11	Decreased	-2.068	APOE,APP,CAMP,CD36,CD44,CD63,CTSL,HLA-DRA,HMOX1,HRH1,HSPA1A/HSPA1B,HSPA4,HSPD1,HSPH1,IGFBP2,IL2RG,JUND,KLF4,LGALS1,MGST1,MMP2,MSR1,MT-ND3,PELI1,RBP4,RBPJ,RGCC,S100A8,SDC2,SERPINB5,SERPING1,STAT3,STXBP2,THBS1,TNFAIP3,TREM1	36
Lipid Metabolism,Molecular Transport,Small Molecule Biochemistry	Transport of lipid	5.45e-06		-1.982	AKR1C1/AKR1C2,APOC1,APOE,APP,CD36,FABP4,MSR1,PLIN2,RBP4,S100A8,SCD,TTC39B	12
Inflammatory Disease,Organismal Injury and Abnormalities	Chronic inflammatory disorder	1.58e-11		-1.938	ADGRE5,APOE,APP,ATP1B1,CAMP,CD36,CD44,CD52,CFD,CTSC,CTSL,DNAJA4,FABP4,HLA-DRA,HLA-DRB5,HMOX1,HPGD,HRH1,HSPA1A/HSPA1B,HSPD1,IL2RG,LGALS1,LST1,MMP2,PDE4B,POR,PTPN1,RBP4,RGCC,RPS12,S100A8,SDC2,SERPINB5,STAT3,THBS1,TNFAIP3,TREM1,ZNF331	38
Cardiovascular System Development and Function,Cellular Movement	Migration of vascular endothelial cells	7.78e-06		-1.856	CD36,CD44,CD63,HRH1,LGALS1,MMP2,NCL,PTPN1,STAT3,THBS1	10
Cancer,Organismal Injury and Abnormalities	Nonhematologic malignant neoplasm	8.19e-09		-1.831	ADGRE5,AHSA1,AKR1C1/AKR1C2,AKR1C3,ANKDD1A,ANKRD28,APOC1,APOE,APP,ARF6,ARHGAP26,ARMC9,ARPC2,ATP1B1,ATP1B3,B3GNT5,C1QB,C1QC,C2orf68,CAMP,CCDC138,CD163L1,CD36,CD44,CD52,CD63,CENPU,CFD,CHCHD10,COLEC12,CRIP1,CSTB,CTSA,CTSC,CTSL,CYTIP,DAPK1,DDX21,DEFB1,DNAJA4,DNAJB1,DPYSL2,FABP4,FGD4,FGF18,FTL,GPCPD1,HLA-DRA,HLA-DRB5,HMOX1,HPGD,HRH1,HSPA1A/HSPA1B,HSPA4,HSPA9,HSPB1,HSPD1,HSPE1,HSPH1,IFI6,IFITM10,IGFBP2,…	138
Cell Death and Survival	Cell death of connective tissue cells	2.42e-06		-1.815	APP,CAMP,CD36,CD44,DAPK1,HMOX1,HSPD1,JUND,NUPR1,PELI1,PLAC8,POR,PTPN1,S100A8,SOD2,STAT3,THBS1,TNFAIP3,YWHAZ	19
Cardiovascular System Development and Function,Cellular Movement	Migration of endothelial cells	1.26e-06		-1.793	APOE,CD36,CD44,CD63,FGF18,HRH1,HSPB1,LGALS1,MMP2,NCL,PTPN1,RGCC,STAT3,THBS1,YWHAZ	15
Organismal Injury and Abnormalities	Angiogenesis of lesion	0.000114		-1.782	CD36,CD44,LGALS1,MMP2,SERPINB5,STAT3,THBS1	7
Cardiovascular System Development and Function,Cellular Movement	Cell movement of endothelial cells	8.38e-07		-1.779	APOE,CAMP,CD36,CD44,CD63,FGF18,HRH1,HSPB1,LGALS1,MMP2,NCL,PTPN1,RGCC,STAT3,THBS1,YWHAZ	16
Cancer,Cell Death and Survival,Organismal Injury and Abnormalities,Tumor Morphology	Necrosis of tumor	1.01e-06		-1.771	APP,CD44,DAPK1,FGF18,HMOX1,HSPA1A/HSPA1B,HSPA9,IGFBP2,LGALS1,PABPC1,RBPJ,RND3,RPS12,RPS4Y1,SERPINB5,STAT3,THBS1	17
Tissue Development	Growth of epithelial tissue	2.34e-06		-1.756	APOE,APP,ATP1B3,CAMP,CD36,CD44,FABP4,FGF18,HMOX1,HRH1,JUND,KLF4,LGALS1,NUPR1,PTPN1,RBPJ,RGCC,S100A8,SERPINB5,STAT3,THBS1,TNFAIP3	22
Cancer,Cellular Movement,Organismal Injury and Abnormalities,Tumor Morphology	Invasion of cancer cells	7.08e-09		-1.744	ADGRE5,CD44,CTSL,HMOX1,KLF4,LGALS1,MMP2,NEDD9,SCGB1A1,SERPINB5	10
Cellular Growth and Proliferation	Proliferation of vascular cells	3.27e-08		-1.707	APOE,ATP1B3,CAMP,CD44,FABP4,HMOX1,HRH1,HSPD1,IGFBP2,KLF4,LGALS1,LRRFIP1,PTPN1,S100A8,STAT3,THBS1	16
Connective Tissue Development and Function,Tissue Development	Growth of connective tissue	3.01e-05		-1.684	CD44,FGF18,FTL,HMOX1,HSPA1A/HSPA1B,HSPB1,JUND,KLF4,LGALS1,LST1,MMP2,NUPR1,POR,PTPN1,RBM3,S100A8,SOD2,STAT3,STIP1	19
Cell-To-Cell Signaling and Interaction,Hematological System Development and Function,Immune Cell Trafficking,Inflammatory Response	Activation of leukocytes	1.09e-12		-1.677	APOE,APP,CAMP,CD36,CD44,CD63,CTSL,HLA-DRA,HMOX1,HRH1,HSPA1A/HSPA1B,HSPA4,HSPD1,HSPH1,IGFBP2,IL2RG,JUND,KLF4,LGALS1,MGST1,MSR1,MT-ND3,PELI1,RBP4,RBPJ,S100A8,SERPING1,STAT3,STXBP2,THBS1,TNFAIP3,TREM1	32
Cardiovascular System Development and Function,Organismal Development,Tissue Morphology	Density of blood vessel	1.04e-05		-1.671	APOE,APP,MMP2,PTPN1,RND3,SERPINB5,THBS1	7
Cellular Movement,Hematological System Development and Function,Immune Cell Trafficking,Inflammatory Response	Cell movement of phagocytes	2.64e-07		-1.668	APOE,APP,CAMP,CD36,CD44,CFD,CTSC,DEFB1,FABP4,HMOX1,HRH1,HSPB1,LGALS1,PDE4B,PTPN1,PVR,S100A8,SERPING1,STAT3,THBS1,TNFAIP3,TREM1	22
Molecular Transport	Export of molecule	3.32e-05		-1.611	APOC1,APOE,APP,CD36,FABP4,HMOX1,HSPA9,MSR1,S100A8,SCD,STAT3,TTC39B	12
Lipid Metabolism,Small Molecule Biochemistry	Fatty acid metabolism	4.62e-06		-1.597	AKR1C1/AKR1C2,AKR1C3,APOC1,APOE,APP,CAMP,CD36,FABP4,HMOX1,HPGD,HRH1,LTA4H,MGST3,MSR1,PLIN2,RBP4,S100A8,SCD,STAT3,TTC39B	20
Neurological Disease,Organismal Injury and Abnormalities	Progressive neurological disorder	7.88e-08		-1.59	APOC1,APOE,APP,ATP1B1,CD36,CD44,CD52,CFD,CHCHD10,CSTB,DPYSL2,FTL,HLA-DRA,HMOX1,HRH1,HSPA1A/HSPA1B,HSPA9,HSPB1,HSPD1,IGFBP2,LGALS1,MMP2,MT-TP,OOEP,PDE4B,PLD3,SCD,SERPING1,SOD2,STAT3,STIP1,YWHAZ	32
Cellular Function and Maintenance	Engulfment of leukocytes	2.27e-05		-1.586	APOE,APP,CAMP,CD36,CD44,HMOX1,MSR1,RGCC,THBS1,TREM1	10
Cell Death and Survival	Cell death of fibroblasts	2.2e-05		-1.576	APP,CAMP,DAPK1,HMOX1,JUND,NUPR1,PELI1,PTPN1,S100A8,SOD2,STAT3	11
Cell Death and Survival	Cell death of lymphoma cell lines	0.000101		-1.57	CD44,HSPB1,LGALS1,NCL,PDE4B,SOD2,STAT3,TNFAIP3,YWHAZ	9
Cancer,Cell Death and Survival,Organismal Injury and Abnormalities,Tumor Morphology	Cell death of tumor cells	1.55e-05		-1.569	APP,CD44,DAPK1,FGF18,HMOX1,HSPA1A/HSPA1B,HSPA9,LGALS1,PABPC1,RBPJ,RND3,RPS12,RPS4Y1,SERPINB5,STAT3	15
Lipid Metabolism,Molecular Transport,Small Molecule Biochemistry	Accumulation of lipid	8.4e-06		-1.557	APOC1,APOE,APP,ARF6,CD36,CD44,FABP4,HMOX1,HPGD,HRH1,MSR1,PLIN2,PTPN1,SCD	14
Inflammatory Response,Organismal Injury and Abnormalities	Inflammation of organ	1.82e-10		-1.539	AHSA1,APOE,APP,ATP1B1,CAMP,CD36,CD44,CTSL,CYTIP,DEFB1,DPYSL2,FABP4,HLA-DRA,HLA-DRB5,HMOX1,HPGD,HRH1,HSPD1,IFI6,IL2RG,KLF4,LGALS1,MALAT1,MMP2,OASL,PDE4B,PELI1,POR,PTPN1,RBPJ,RGCC,RPS12,S100A8,SCD,SCGB1A1,SERPINB5,SERPING1,SOD2,STAT3,THBS1,TNFAIP3,TREM1,TTC39B,ZNF331	44
Cell-To-Cell Signaling and Interaction,Inflammatory Response	Immune response of leukocytes	8.38e-05		-1.495	APOE,APP,CAMP,CD36,CD44,HMOX1,LGALS1,MSR1,RGCC,STAT3,THBS1,TREM1	12
Cellular Movement,Hematological System Development and Function,Immune Cell Trafficking,Inflammatory Response	Cell movement of macrophages	2.81e-07		-1.485	APOE,APP,CAMP,CD44,CFD,DEFB1,HMOX1,LGALS1,PTPN1,S100A8,SERPING1,STAT3,THBS1,TNFAIP3,TREM1	15
Cellular Development,Cellular Growth and Proliferation,Connective Tissue Development and Function,Skeletal and Muscular System Development and Function,Tissue Development	Osteoclastogenesis	9.91e-05		-1.484	CD44,FGF18,IGFBP2,NUPR1,RBPJ,S100A8,STAT3,TNFAIP3	8
Cancer,Organismal Injury and Abnormalities	Non-melanoma solid tumor	1.68e-09		-1.456	ADGRE5,AHSA1,AKR1C1/AKR1C2,AKR1C3,ANKDD1A,ANKRD28,APOC1,APOE,APP,ARF6,ARHGAP26,ARMC9,ARPC2,ATP1B1,ATP1B3,B3GNT5,C1QB,C1QC,C2orf68,CAMP,CCDC138,CD163L1,CD36,CD44,CD52,CD63,CENPU,CFD,CHCHD10,COLEC12,CRIP1,CSTB,CTSA,CTSC,CTSL,CYTIP,DAPK1,DDX21,DEFB1,DNAJA4,DNAJB1,DPYSL2,FABP4,FGD4,FGF18,FTL,GPCPD1,HLA-DRA,HLA-DRB5,HMOX1,HPGD,HRH1,HSPA1A/HSPA1B,HSPA4,HSPA9,HSPB1,HSPD1,HSPE1,HSPH1,IFI6,IFITM10,IGFBP2,…	139
Inflammatory Response	Inflammation of body cavity	3.45e-06		-1.456	AHSA1,APOE,ATP1B1,CAMP,CD36,CD44,CTSL,FABP4,HLA-DRB5,HMOX1,HPGD,HRH1,IL2RG,LGALS1,MMP2,PDE4B,POR,PTPN1,RBPJ,S100A8,SCD,SCGB1A1,SOD2,STAT3,THBS1,TNFAIP3,TREM1,TTC39B	28
Cancer,Organismal Injury and Abnormalities	Cancer	6.61e-10		-1.45	ADGRE5,AHSA1,AKR1C1/AKR1C2,AKR1C3,ANKDD1A,ANKRD28,APOC1,APOE,APP,ARF6,ARHGAP26,ARMC9,ARPC2,ATP1B1,ATP1B3,B3GNT5,C1QB,C1QC,C2orf68,CAMP,CCDC138,CD163L1,CD36,CD44,CD52,CD63,CENPU,CFD,CHCHD10,COLEC12,CRIP1,CSTB,CTSA,CTSC,CTSL,CYTIP,DAPK1,DDX21,DEFB1,DNAJA4,DNAJB1,DPYSL2,FABP4,FGD4,FGF18,FTL,GPCPD1,HLA-DRA,HLA-DRB5,HMOX1,HPGD,HRH1,HSPA1A/HSPA1B,HSPA4,HSPA9,HSPB1,HSPD1,HSPE1,HSPH1,IFI6,IFITM10,IGFBP2,…	142
Cardiovascular System Development and Function,Cellular Movement	Cell movement of endothelial cell lines	5.56e-05		-1.432	APOE,CD36,CD44,MMP2,NCL,SDC2,THBS1	7
Cellular Movement	Migration of cells	2.09e-10		-1.423	ADGRE5,ANKRD28,APOC1,APOE,APP,ARF6,ARPC2,CAMP,CD36,CD44,CD63,CFD,CTSC,CTSL,CYTIP,DEFB1,DPYSL2,FABP4,FGD4,FGF18,HMOX1,HRH1,HSPA1A/HSPA1B,HSPA9,HSPB1,HSPD1,IGFBP2,KLF4,LGALS1,MALAT1,MGAT1,MMP2,MSR1,NCL,NEDD9,NUPR1,PDE4B,PELI1,PKP2,PTPN1,PVR,RGCC,RND3,S100A8,SCGB1A1,SDC2,SERPINB5,SERPING1,SOD2,STAT3,THBS1,TNFAIP3,TREM1,YWHAZ	54
Lipid Metabolism,Molecular Transport,Small Molecule Biochemistry	Accumulation of triacylglycerol	6.46e-05		-1.411	APOC1,APOE,CD36,CD44,FABP4,PLIN2,SCD	7
Lipid Metabolism,Small Molecule Biochemistry	Storage of lipid	3.39e-06		-1.408	APOE,CD36,FABP4,MSR1,PLIN2,SCD,TTC39B	7
Cell-To-Cell Signaling and Interaction,Hematological System Development and Function,Immune Cell Trafficking,Inflammatory Response	Activation of T lymphocytes	6.93e-07		-1.407	APOE,CD44,HLA-DRA,HSPA1A/HSPA1B,HSPA4,HSPD1,HSPH1,IGFBP2,IL2RG,LGALS1,MGST1,PELI1,RBPJ,STAT3,STXBP2,THBS1	16
Lipid Metabolism,Molecular Transport,Small Molecule Biochemistry	Efflux of cholesterol	1.99e-06		-1.37	APOC1,APOE,APP,CD36,FABP4,MSR1,S100A8,SCD,TTC39B	9
Cellular Development,Cellular Growth and Proliferation,Hematological System Development and Function,Hematopoiesis,Lymphoid Tissue Structure and Development,Tissue Development	Development of antigen presenting cells	0.000109		-1.354	APP,CAMP,HRH1,KLF4,NUPR1,PLAC8,RBPJ,STAT3,TREM1	9
Digestive System Development and Function,Gastrointestinal Disease,Hepatic System Development and Function,Hepatic System Disease,Inflammatory Disease,Inflammatory Response,Organ Development,Organismal Injury and Abnormalities	Inflammation of liver	1.56e-06		-1.352	AHSA1,APOE,CD44,FABP4,HMOX1,IL2RG,LGALS1,MMP2,PDE4B,POR,SCD,SOD2,STAT3,TNFAIP3,TTC39B	15
Cellular Growth and Proliferation,Connective Tissue Development and Function,Tissue Development	Proliferation of connective tissue cells	9.72e-05		-1.306	CD44,FGF18,HMOX1,HSPA1A/HSPA1B,HSPB1,JUND,KLF4,LGALS1,MMP2,NUPR1,POR,PTPN1,RBM3,S100A8,SOD2,STAT3,STIP1	17
Cell Death and Survival	Apoptosis of connective tissue cells	6.07e-05		-1.303	APP,CD36,CD44,DAPK1,JUND,NUPR1,PELI1,POR,PTPN1,S100A8,STAT3	11
Cellular Movement	Cell movement	3.58e-09		-1.278	ADGRE5,ANKRD28,APOC1,APOE,APP,ARF6,ARPC2,CAMP,CD36,CD44,CD63,CFD,CTSC,CTSL,CYTIP,DEFB1,DPYSL2,FABP4,FGD4,FGF18,HMOX1,HRH1,HSPA1A/HSPA1B,HSPA9,HSPB1,HSPD1,IGFBP2,JUND,KLF4,LGALS1,MALAT1,MGAT1,MMP2,MSR1,NCL,NEDD9,NUPR1,PDE4B,PELI1,PKP2,PTPN1,PVR,RGCC,RND3,S100A8,SCGB1A1,SDC2,SERPINB5,SERPING1,SOD2,STAT3,THBS1,TNFAIP3,TREM1,YWHAZ	55
Lipid Metabolism,Small Molecule Biochemistry	Conversion of lipid	2.49e-07		-1.261	AKR1C1/AKR1C2,AKR1C3,APOE,APP,FABP4,FTL,HMOX1,HPGD,LTA4H,POR,SCD,SOD2	12
Cellular Movement	Invasion of tumor cell lines	1.27e-05		-1.248	ADGRE5,APOC1,APP,ARF6,CD44,DPYSL2,HMOX1,HSPA1A/HSPA1B,HSPA9,IGFBP2,JUND,KLF4,LGALS1,MALAT1,MMP2,NEDD9,NUPR1,PTPN1,RND3,RPS4Y1,SDC2,SERPINB5,SOD2,STAT3,THBS1	25
Developmental Disorder,Organismal Injury and Abnormalities	Dysgenesis	0.000147		-1.248	AKR1C1/AKR1C2,APOE,APP,ARF6,CSTB,CYTIP,HMOX1,IL2RG,KLF4,NEDD9,PKP2,RBP4,RBPJ,SCD,STAT3,THBS1	16
Cellular Function and Maintenance,Hematological System Development and Function	Engulfment of myeloid cells	5.37e-05		-1.241	APP,CAMP,CD36,CD44,HMOX1,MSR1,RGCC,THBS1,TREM1	9
Immunological Disease,Organismal Injury and Abnormalities	Systemic autoimmune syndrome	5.48e-14		-1.231	ADGRE5,APOE,ATP1B1,CAMP,CD36,CD44,CD52,CFD,CRIP1,CTSA,CTSC,DAPK1,DNAJA4,FABP4,HLA-DRA,HLA-DRB5,HMOX1,HRH1,HSPA1A/HSPA1B,HSPD1,IFI6,LGALS1,LST1,MGST1,MMP2,MT1X,MT2A,OASL,PABPC1,PDE4B,PTPN1,RBP4,RGCC,RPS4Y1,S100A8,SCD,SDC2,SERPINB5,SERPING1,SNHG32,SOD2,STAT3,THBS1,TNFAIP3,ZNF331	45
Tissue Development	Development of epithelial tissue	8.26e-07		-1.231	APOE,APP,ATP1B3,CAMP,CD36,CD44,FABP4,HMOX1,HRH1,KLF4,LGALS1,MMP2,PTPN1,RBPJ,RGCC,S100A8,SERPINB5,STAT3,THBS1	19
Cell-To-Cell Signaling and Interaction,Hematological System Development and Function,Immune Cell Trafficking,Inflammatory Response	Activation of lymphocytes	9.72e-07		-1.22	APOE,CAMP,CD44,HLA-DRA,HSPA1A/HSPA1B,HSPA4,HSPD1,HSPH1,IGFBP2,IL2RG,LGALS1,MGST1,PELI1,RBPJ,STAT3,STXBP2,THBS1,TNFAIP3	18
Lipid Metabolism,Molecular Transport,Small Molecule Biochemistry	Transport of steroid	3.62e-06		-1.204	AKR1C1/AKR1C2,APOC1,APOE,APP,CD36,FABP4,MSR1,S100A8,SCD,TTC39B	10
Cellular Movement	Cell movement of colorectal cancer cell lines	3.5e-06		-1.197	CAMP,CD44,DPYSL2,IGFBP2,KLF4,MALAT1,MMP2,S100A8,SDC2,STAT3	10
Lipid Metabolism,Molecular Transport,Small Molecule Biochemistry	Concentration of triacylglycerol	5.07e-05		-1.179	APOC1,APOE,CD36,FABP4,HRH1,IGFBP2,MOGAT1,PLIN2,POR,PTPN1,RGCC,SCD,SOD2	13
Cell-To-Cell Signaling and Interaction,Renal and Urological System Development and Function	Binding of kidney cell lines	5.45e-06		-1.157	CD44,DAPK1,IL2RG,MSR1,NCL,PTPN1,SDC2	7
Metabolic Disease,Organismal Injury and Abnormalities	Amyloidosis	1.04e-08		-1.154	APOC1,APOE,APP,ATP1B1,CD36,CD63,CFD,DPYSL2,HMOX1,HRH1,HSPA1A/HSPA1B,HSPA9,HSPD1,IGFBP2,LGALS1,MMP2,OOEP,PDE4B,PLD3,SCD,SOD2,STAT3,STIP1,YWHAZ	24
Cancer,Organismal Injury and Abnormalities	Malignant solid tumor	6.76e-09		-1.151	ADGRE5,AHSA1,AKR1C1/AKR1C2,AKR1C3,ANKDD1A,ANKRD28,APOC1,APOE,APP,ARF6,ARHGAP26,ARMC9,ARPC2,ATP1B1,ATP1B3,B3GNT5,C1QB,C1QC,C2orf68,CAMP,CCDC138,CD163L1,CD36,CD44,CD52,CD63,CENPU,CFD,CHCHD10,COLEC12,CRIP1,CSTB,CTSA,CTSC,CTSL,CYTIP,DAPK1,DDX21,DEFB1,DNAJA4,DNAJB1,DPYSL2,FABP4,FGD4,FGF18,FTL,GPCPD1,HLA-DRA,HLA-DRB5,HMOX1,HPGD,HRH1,HSPA1A/HSPA1B,HSPA4,HSPA9,HSPB1,HSPD1,HSPE1,HSPH1,IFI6,IFITM10,IGFBP2,…	140
Cell-To-Cell Signaling and Interaction,Hematological System Development and Function,Immune Cell Trafficking,Inflammatory Response	Activation of antigen presenting cells	1.53e-08		-1.151	APOE,APP,CAMP,CD36,CD44,CTSL,HMOX1,HRH1,HSPD1,JUND,KLF4,MSR1,PELI1,RBP4,SERPING1,STAT3,THBS1	17
Cellular Function and Maintenance	Engulfment of blood cells	9.24e-07		-1.144	AHSA1,APOE,APP,ARPC2,CAMP,CD36,CD44,HMOX1,MGAT1,MSR1,RGCC,THBS1,TREM1	13
Cancer,Organismal Injury and Abnormalities	Extraadrenal retroperitoneal tumor	6.66e-05		-1.13	AKR1C1/AKR1C2,ANKDD1A,APOC1,APP,ARHGAP26,ARMC9,CD163L1,CD44,CD63,CENPU,COLEC12,CSTB,CTSL,CYTIP,DAPK1,DEFB1,FABP4,HLA-DRA,HMOX1,HRH1,HSPA4,HSPA9,IGFBP2,IL2RG,KLF4,LCOR,LGALS1,LRRFIP1,LTA4H,MALAT1,MMP2,MSR1,MT1E,MT1G,NCL,OOEP,PABPC1,PDE4B,PKP2,PLAC8,PLIN2,POR,RSF1,S100A8,SAMHD1,SCD,SERPINB5,SERPING1,SMAP2,SMIM4,SOD2,STAT3,STXBP2,THBS1,TREM1,YWHAZ	56
Free Radical Scavenging,Molecular Transport	Quantity of superoxide	5.98e-06		-1.119	APOE,APP,CTSA,HMOX1,NUPR1,SOD2	6
Cellular Movement	Migration of tumor cell lines	8.87e-08		-1.115	ADGRE5,ANKRD28,APOC1,APP,ARF6,ARPC2,CAMP,CD36,CD44,CTSL,DPYSL2,FGD4,HMOX1,HSPA1A/HSPA1B,HSPA9,IGFBP2,KLF4,LGALS1,MALAT1,MGAT1,MMP2,NCL,NEDD9,NUPR1,PTPN1,PVR,S100A8,SDC2,SOD2,STAT3	30
Cellular Compromise,Lipid Metabolism,Small Molecule Biochemistry	Peroxidation of lipid	6.23e-05		-1.111	APOE,APP,FTL,HMOX1,POR,SCD,SOD2	7
Cell-To-Cell Signaling and Interaction,Inflammatory Response	Immune response of T lymphocytes	5.35e-05		-1.109	APOE,APP,CAMP,HMOX1,LGALS1,MSR1,STAT3	7
Organismal Injury and Abnormalities	Abdominal lesion	1.32e-07		-1.085	ADGRE5,AHSA1,AKR1C1/AKR1C2,AKR1C3,ANKDD1A,ANKRD28,APOC1,APOE,APP,ARF6,ARHGAP26,ARMC9,ATP1B1,ATP1B3,B3GNT5,C1QB,C1QC,C2orf68,CAMP,CCDC138,CD163L1,CD36,CD44,CD52,CD63,CENPU,CFD,CHCHD10,COLEC12,CRIP1,CSTB,CTSA,CTSC,CTSL,CYTIP,DAPK1,DDX21,DEFB1,DNAJA4,DPYSL2,FABP4,FGD4,FGF18,FTL,GPCPD1,HLA-DRA,HLA-DRB5,HMOX1,HPGD,HRH1,HSPA1A/HSPA1B,HSPA4,HSPA9,HSPB1,HSPD1,HSPE1,HSPH1,IFI6,IFITM10,IGFBP2,IL2RG,JUND,KI…	132
Cell Death and Survival,Organismal Injury and Abnormalities	Cell death of microvascular endothelial cells	3.98e-06		-1.077	APP,CD36,MALAT1,MMP2,THBS1	5
Energy Production,Lipid Metabolism,Small Molecule Biochemistry	Oxidation of lipid	0.00012		-1.074	AKR1C1/AKR1C2,AKR1C3,APOE,APP,CD36,FABP4,HPGD,PLIN2,POR,SCD	10
Organismal Injury and Abnormalities	Growth of lesion	2.93e-07		-1.072	AKR1C3,APOE,ARF6,CD36,CD44,DAPK1,FGF18,HMOX1,HPGD,HSPA1A/HSPA1B,HSPA4,HSPD1,HSPH1,IGFBP2,KLF4,LGALS1,MALAT1,MMP2,NEDD9,NUPR1,PELI1,RBPJ,RPS27,SDC2,SERPINB5,SOD2,STAT3,THBS1,TNFAIP3,YWHAZ	30
Cancer,Organismal Injury and Abnormalities	Growth of tumor	9.08e-07		-1.072	AKR1C3,ARF6,CD36,CD44,DAPK1,FGF18,HMOX1,HPGD,HSPA1A/HSPA1B,HSPA4,HSPD1,HSPH1,IGFBP2,KLF4,LGALS1,MALAT1,MMP2,NEDD9,NUPR1,PELI1,RBPJ,RPS27,SDC2,SERPINB5,SOD2,STAT3,THBS1,TNFAIP3,YWHAZ	29
Connective Tissue Disorders,Organismal Injury and Abnormalities,Skeletal and Muscular Disorders	Non-traumatic arthropathy	1.68e-10		-1.067	ADGRE5,APOE,ATP1B1,CD36,CD44,CFD,CTSC,DNAJA4,FABP4,FGF18,HLA-DRA,HLA-DRB5,HMOX1,HSPA1A/HSPA1B,HSPD1,LGALS1,LST1,MMP2,PDE4B,PTPN1,RBP4,RBPJ,RGCC,S100A8,SDC2,SERPINB5,SOD2,STAT3,THBS1,TNFAIP3,ZNF331	31
Inflammatory Response	Innate immune response	2.16e-07		-1.067	APOE,APP,CAMP,CD44,COLEC12,IFI6,IL2RG,MMP2,SAMHD1,SERPING1,TNFAIP3,TREM1	12
Cell-To-Cell Signaling and Interaction,Hematological System Development and Function,Immune Cell Trafficking,Inflammatory Response	Activation of mononuclear leukocytes	4.39e-07		-1.067	APOE,CAMP,CD44,HLA-DRA,HSPA1A/HSPA1B,HSPA4,HSPD1,HSPH1,IGFBP2,IL2RG,LGALS1,MGST1,PELI1,RBPJ,STAT3,STXBP2,THBS1,TNFAIP3,TREM1	19
Lipid Metabolism,Small Molecule Biochemistry	Storage of cholesterol	7.48e-06		-1.067	APOE,CD36,MSR1,TTC39B	4
Endocrine System Disorders,Gastrointestinal Disease,Hepatic System Disease,Metabolic Disease,Organismal Injury and Abnormalities	Insulin resistance of liver	4.49e-05		-1.067	APOC1,PTPN1,SCD,SOD2	4
Cell Death and Survival	Quantity of apoptotic cells	7.89e-08		-1.066	APOE,APP,CD36,CTSA,MMP2,SERPINB5,SOD2,STAT3,THBS1	9
Protein Synthesis	Synthesis of protein	1.45e-10		-1.061	APP,DAPK1,HSPA1A/HSPA1B,HSPB1,IGFBP2,MALAT1,MT-TE,MT-TP,MT-TQ,MT-TV,NCL,PABPC1,PABPC4,RBM3,RBP4,RPL30,RPL41,RPS23,RPS4Y1,SOD2,STAT3,STIP1,THBS1	23
Cancer,Organismal Injury and Abnormalities,Tumor Morphology	Invasion of tumor	5.77e-09		-1.059	ADGRE5,APOE,CD44,CTSL,HMOX1,KLF4,LGALS1,MMP2,NEDD9,S100A8,SCGB1A1,SERPINB5,STAT3,THBS1	14
Cell Death and Survival	Apoptosis of prostate cancer cell lines	0.000134		-1.053	DEFB1,HSPA1A/HSPA1B,HSPD1,LGALS1,MALAT1,SERPINB5,SOD2,STAT3	8
Free Radical Scavenging	Production of reactive oxygen species	5.79e-09		-1.051	APOE,APP,CAMP,CD36,CD44,CD52,CHCHD10,FTL,HMOX1,HSPA9,JUND,KLF4,MSR1,MT-TE,POR,RBP4,RBPJ,RND3,S100A8,SOD2,YWHAZ	21
Developmental Disorder,Organismal Injury and Abnormalities	Hypoplasia of organ	0.000106		-1.042	APOE,APP,ARF6,CSTB,CYTIP,IL2RG,KLF4,NEDD9,PKP2,RBP4,RBPJ,SCD,STAT3,THBS1	14
Cellular Movement,Hematological System Development and Function,Immune Cell Trafficking,Inflammatory Response	Cellular infiltration by macrophages	2.15e-05		-1.04	APOE,APP,CD44,CFD,HMOX1,LGALS1,PTPN1,SERPING1,STAT3,TNFAIP3	10
Dermatological Diseases and Conditions,Inflammatory Disease,Inflammatory Response,Organismal Injury and Abnormalities	Dermatitis	1.27e-11		-1.038	APOE,CAMP,CD44,CTSL,CYTIP,DEFB1,DPYSL2,FABP4,HLA-DRA,HLA-DRB5,HRH1,IFI6,IL2RG,LGALS1,OASL,PDE4B,POR,RBPJ,S100A8,SERPINB5,SERPING1,THBS1,TNFAIP3,ZNF331	24
Cellular Function and Maintenance	Endocytosis by eukaryotic cells	1.19e-06		-1.028	AHSA1,APOE,APP,ARF6,ARPC2,CAMP,CD36,CD44,DPYSL2,HMOX1,MGAT1,MSR1,PELI1,RGCC,THBS1,TREM1	16
Connective Tissue Disorders,Inflammatory Disease,Inflammatory Response,Organismal Injury and Abnormalities,Skeletal and Muscular Disorders	Inflammation of joint	1.2e-10		-1.019	ADGRE5,APOE,ATP1B1,CD36,CD44,CFD,CTSC,DNAJA4,FABP4,FGF18,FTL,HLA-DRA,HLA-DRB5,HMOX1,HSPA1A/HSPA1B,HSPD1,LGALS1,LST1,MMP2,MSR1,PDE4B,PTPN1,RBP4,RBPJ,RGCC,S100A8,SDC2,SERPINB5,SOD2,STAT3,THBS1,TNFAIP3,YWHAZ,ZNF331	34
Cancer,Organismal Injury and Abnormalities	Carcinoma	2.24e-08		-1.019	ADGRE5,AHSA1,AKR1C1/AKR1C2,AKR1C3,ANKDD1A,ANKRD28,APOC1,APOE,APP,ARF6,ARHGAP26,ARMC9,ARPC2,ATP1B1,ATP1B3,B3GNT5,C1QB,C1QC,C2orf68,CAMP,CCDC138,CD163L1,CD36,CD44,CD63,CENPU,CFD,CHCHD10,COLEC12,CRIP1,CSTB,CTSA,CTSC,CTSL,CYTIP,DAPK1,DDX21,DEFB1,DNAJA4,DNAJB1,DPYSL2,FABP4,FGD4,FGF18,FTL,GPCPD1,HLA-DRA,HLA-DRB5,HMOX1,HPGD,HRH1,HSPA1A/HSPA1B,HSPA4,HSPA9,HSPB1,HSPD1,HSPE1,HSPH1,IFI6,IFITM10,IGFBP2,IL2RG…	136
Cellular Movement,Hematological System Development and Function,Immune Cell Trafficking,Inflammatory Response	Cellular infiltration by phagocytes	1.23e-07		-1.018	APOE,APP,CD36,CD44,CFD,CTSC,FABP4,HMOX1,HSPB1,LGALS1,PTPN1,S100A8,SERPING1,STAT3,TNFAIP3,TREM1	16
Lipid Metabolism,Small Molecule Biochemistry	Binding of lipid	4.13e-07		-1.005	APOE,APP,CAMP,DNAJB1,PTPN1,SDC2,SERPINB5,SERPING1,STIP1	9
Cellular Movement	Invasion of cells	1.63e-06		-1.005	ADGRE5,APOC1,APP,ARF6,CAMP,CD44,CTSL,DPYSL2,FGD4,HMOX1,HSPA1A/HSPA1B,HSPA9,IGFBP2,JUND,KLF4,LGALS1,MALAT1,MMP2,NEDD9,NUPR1,PTPN1,RND3,RPS4Y1,S100A8,SCGB1A1,SDC2,SERPINB5,SOD2,STAT3,THBS1	30
Organismal Injury and Abnormalities	Metaplasia	0.000113		-1	CD44,HRH1,LGALS1,STAT3,THBS1	5
Inflammatory Response	Inflammatory response	8.32e-12		-0.978	ADGRE5,APOE,APP,CAMP,CD36,CD44,CD63,CTSA,DEFB1,FABP4,HMOX1,HRH1,HSPB1,HSPD1,JUND,KLF4,LGALS1,MMP2,MSR1,MT-ND3,NCL,NEDD9,NUPR1,PDE4B,PELI1,PLIN2,S100A8,SCGB1A1,SERPING1,STAT3,THBS1,TNFAIP3,TREM1	33
Cardiovascular Disease,Organismal Injury and Abnormalities	Dysfunction of heart	6.89e-05		-0.97	APOE,CD36,CTSA,HMOX1,MGAT1,MMP2,PKP2,RBPJ,SCD,SOD2	10
Cell-To-Cell Signaling and Interaction,Inflammatory Response	Response of macrophages	7.34e-05		-0.97	APP,CAMP,CD36,CD44,HMOX1,RGCC,STAT3,THBS1,TREM1	9
Gastrointestinal Disease,Hepatic System Disease,Metabolic Disease,Organismal Injury and Abnormalities	Hepatic steatosis	6.09e-07		-0.967	AHSA1,APOE,CD36,CD44,FABP4,HMOX1,LTA4H,PDE4B,PLIN2,POR,RBPJ,RGCC,SCD,SOD2,STAT3,TTC39B	16
Cardiovascular System Development and Function,Hematological System Development and Function	Mean arterial pressure	8.94e-05		-0.965	APOE,APP,CD44,PTPN1,SOD2,THBS1,TREM1	7
Cellular Function and Maintenance	Endocytosis	3.11e-08		-0.959	AHSA1,APOC1,APOE,APP,ARF6,ARPC2,CAMP,CD36,CD44,CD63,DPYSL2,FGD4,HMOX1,HSPA9,MGAT1,MSR1,NCL,PELI1,PTPN1,RGCC,THBS1,TREM1	22
Cell Death and Survival,Organismal Injury and Abnormalities	Cell death of endothelial cells	4.95e-11		-0.953	APP,ATP1B3,CD36,HMOX1,HSPD1,KLF4,LGALS1,MALAT1,MMP2,RBP4,RBPJ,S100A8,SERPINB5,STAT3,THBS1,TNFAIP3	16
Cellular Movement	Cell movement of tumor cell lines	1.8e-08		-0.951	ADGRE5,ANKRD28,APOC1,APP,ARF6,ARPC2,CAMP,CD36,CD44,CTSL,DPYSL2,FGD4,HMOX1,HRH1,HSPA1A/HSPA1B,HSPA9,IGFBP2,JUND,KLF4,LGALS1,MALAT1,MGAT1,MMP2,NCL,NEDD9,NUPR1,PTPN1,PVR,S100A8,SDC2,SERPINB5,SOD2,STAT3,THBS1	34
Protein Synthesis	Metabolism of protein	7.07e-12		-0.942	APOE,APP,ATP1B1,ATP1B3,CSTB,CTSA,CTSC,CTSL,DAPK1,HSPA1A/HSPA1B,HSPB1,HSPD1,IGFBP2,LTA4H,MALAT1,MMP2,MT-TE,MT-TP,MT-TQ,MT-TV,NCL,PABPC1,PABPC4,RBM3,RBP4,RPL30,RPL41,RPS23,RPS4Y1,SOD2,STAT3,STIP1,THBS1,TNFAIP3,TRHDE,UBC	36
Lipid Metabolism,Small Molecule Biochemistry	Esterification of cholesterol	5.07e-06		-0.914	APOC1,APOE,APP,CD36,SCD	5
Inflammatory Response	Inflammation of absolute anatomical region	5.96e-08		-0.911	AHSA1,APOE,APP,ATP1B1,CAMP,CD36,CD44,CTSL,DAPK1,FABP4,HLA-DRB5,HMOX1,HPGD,HRH1,HSPD1,IL2RG,KLF4,LGALS1,MALAT1,MMP2,PDE4B,PELI1,POR,PTPN1,RBPJ,RGCC,RPS12,S100A8,SCD,SCGB1A1,SOD2,STAT3,THBS1,TNFAIP3,TREM1,TTC39B	36
Cell Death and Survival	Apoptosis of liver	0.000105		-0.911	APP,ARF6,JUND,NCL,PTPN1,SCD,SOD2,STAT3	8
Cardiovascular Disease,Organismal Injury and Abnormalities	Atherosclerosis	7.05e-08		-0.906	APOC1,APOE,APP,CD36,CD44,FABP4,HMOX1,HSPD1,KLF4,MMP2,MSR1,PDE4B,PLIN2,S100A8,SCD,STAT3,THBS1,TNFAIP3,TTC39B	19
Cardiovascular Disease,Organismal Injury and Abnormalities	Occlusion of artery	1.56e-07		-0.904	APOC1,APOE,APP,CD36,CD44,FABP4,HMOX1,HRH1,HSPD1,KLF4,MMP2,MSR1,PDE4B,PLIN2,S100A8,SCD,STAT3,THBS1,TNFAIP3,TTC39B	20
Cellular Development	Maturation of cells	7.39e-05		-0.899	APP,CAMP,CD36,CD44,HLA-DRA,HMOX1,HSPA1A/HSPA1B,HSPA9,HSPD1,MMP2,PTPN1,STAT3,THBS1,YWHAZ	14
Cell-To-Cell Signaling and Interaction,Hair and Skin Development and Function	Binding of epithelial cell lines	0.000142		-0.895	DAPK1,MSR1,NCL,PTPN1,SDC2	5
Cancer,Organismal Injury and Abnormalities	Cancer of cells	2.13e-07		-0.894	ADGRE5,APOC1,APOE,APP,ARF6,ARHGAP26,ARMC9,ATP1B1,C1QC,CCDC138,CD163L1,CD36,CD44,CD52,CD63,CENPU,CFD,CTSA,CTSC,CTSL,CYTIP,DAPK1,FABP4,FGF18,HLA-DRA,HLA-DRB5,HMOX1,HSPA1A/HSPA1B,HSPA9,HSPB1,HSPH1,IFI6,IL2RG,JUND,KIF16B,KLF4,LCOR,LGALS1,LRRFIP1,MALAT1,MMP2,MOGAT1,MRPL18,MSR1,MT-ND3,MT1E,MT1G,NCL,NEDD9,OASL,PABPC1,PABPC4,PCNX1,PDE4B,PKP2,PLAC8,POR,PSME4,PTPN1,RBPJ,RGCC,RND3,S100A8,SAMHD1,SCGB1A1,SDC2…	80
Cellular Movement	Migration of vascular cells	4.35e-06		-0.891	CD36,CD44,CD63,HMOX1,HRH1,IGFBP2,LGALS1,MMP2,NCL,PTPN1,STAT3,THBS1	12
Connective Tissue Disorders,Inflammatory Disease,Inflammatory Response,Organismal Injury and Abnormalities,Skeletal and Muscular Disorders	Experimentally-induced arthritis	4.82e-05		-0.849	ADGRE5,CD44,HMOX1,MMP2,MSR1,STAT3,THBS1,YWHAZ	8
Cancer,Organismal Injury and Abnormalities	Abdominal carcinoma	3e-05		-0.811	ADGRE5,AHSA1,AKR1C1/AKR1C2,AKR1C3,ANKDD1A,ANKRD28,APOC1,APOE,APP,ARF6,ARHGAP26,ARMC9,ATP1B1,ATP1B3,B3GNT5,C1QB,C1QC,C2orf68,CCDC138,CD163L1,CD36,CD44,CD63,CENPU,CFD,CHCHD10,COLEC12,CSTB,CTSA,CTSC,CTSL,CYTIP,DAPK1,DDX21,DEFB1,DNAJA4,DPYSL2,FABP4,FGD4,FGF18,FTL,HLA-DRA,HLA-DRB5,HMOX1,HPGD,HRH1,HSPA1A/HSPA1B,HSPA4,HSPA9,HSPB1,HSPD1,HSPE1,HSPH1,IFI6,IFITM10,IGFBP2,IL2RG,KIF16B,KLF4,LCOR,LGALS1,LRRFIP…	122
Cancer,Hematological Disease,Organismal Injury and Abnormalities	Neoplasia of blood cells	2.48e-08		-0.805	APOE,APP,ARHGAP26,ARMC9,ATP1B1,C1QC,CCDC138,CD36,CD44,CD52,CD63,CTSC,CTSL,CYTIP,DAPK1,DNAJA4,FABP4,FGD4,HLA-DRA,HMOX1,HSPA1A/HSPA1B,HSPA4,HSPB1,HSPD1,HSPH1,IFI6,IL2RG,JUND,KIF16B,KLF4,LGALS1,LRRFIP1,MALAT1,MGST3,MMP2,MSR1,MT-ND3,OASL,PABPC1,PCNX1,PDE4B,PKP2,PLAC8,POR,PSME4,PTPN1,RBPJ,RGCC,RND3,RPL41,RPS12,RPS23,SAMHD1,SERPINB5,SOD2,STAT3,STIP1,THBS1,TNFAIP3,TRHDE,UBC,WDR74,YWHAZ,ZNF331	64
Cell Cycle,Gene Expression	Binding of DNA	1.32e-05		-0.805	APP,DNAJB1,HSPA1A/HSPA1B,IL2RG,JUND,LGALS1,NCL,PELI1,POR,PTPN1,RBPJ,RGCC,SCD,SOD2,STAT3,TNFAIP3,YWHAZ	17
Cell Death and Survival,Organismal Injury and Abnormalities	Apoptosis of microvascular endothelial cells	6.31e-05		-0.8	APP,CD36,MMP2,THBS1	4
Cell-To-Cell Signaling and Interaction	Response of myeloid leukocytes	9.02e-06		-0.795	APP,CAMP,CD36,CD44,HMOX1,STAT3,THBS1,TREM1	8
Cellular Development,Cellular Growth and Proliferation	Proliferation of blood cells	2.92e-08		-0.793	APOE,ARF6,B3GNT5,CAMP,CD36,CD44,CYTIP,FABP4,FTL,HMOX1,HRH1,HSPA1A/HSPA1B,HSPA9,HSPD1,IGFBP2,IL2RG,JUND,KLF4,LGALS1,LST1,PELI1,PVR,RBPJ,SCGB1A1,STAT3,THBS1,TNFAIP3,TREM1	28
Cellular Growth and Proliferation	Outgrowth of cells	0.000132		-0.793	APOE,APP,ARF6,DPYSL2,FGF18,LGALS1,MMP2,PTPN1,RPS4Y1,SOD2,STAT3,THBS1,YWHAZ	13
Cell Death and Survival,Organismal Injury and Abnormalities	Apoptosis of endothelial cells	1.3e-10		-0.763	APP,ATP1B3,CD36,HMOX1,HSPD1,KLF4,LGALS1,MMP2,RBP4,RBPJ,S100A8,SERPINB5,STAT3,THBS1,TNFAIP3	15
Cell Death and Survival,Gastrointestinal Disease,Hepatic System Disease,Organismal Injury and Abnormalities	Cell death of liver cells	2.21e-05		-0.753	APOE,ARF6,HMOX1,HSPD1,JUND,NCL,PTPN1,SCD,SOD2,STAT3	10
Cell-To-Cell Signaling and Interaction,Cellular Function and Maintenance,Hematological System Development and Function	Phagocytosis of granulocytes	7.82e-05		-0.749	CAMP,CD36,CD44,THBS1,TREM1	5
Organismal Survival	Survival of organism	1.23e-07		-0.748	APOE,APP,ARF6,B3GNT5,CAMP,CD44,CTSC,FTL,HLA-DRA,HMOX1,HSPA1A/HSPA1B,IL2RG,LGALS1,MALAT1,MGAT1,MMP2,NCL,PTPN1,RBM3,SERPING1,SOD2,STAT3,STIP1,THBS1,TNFAIP3,TREM1	26
Cancer,Hematological Disease,Organismal Injury and Abnormalities	Myeloid or lymphoid neoplasm	9.79e-09		-0.747	APOE,APP,ARHGAP26,ARMC9,ATP1B1,C1QC,CCDC138,CD163L1,CD36,CD44,CD52,CD63,CTSC,CTSL,CYTIP,DAPK1,DNAJA4,FABP4,FGD4,HLA-DRA,HMOX1,HSPA1A/HSPA1B,HSPA4,HSPB1,HSPD1,HSPH1,IFI6,IL2RG,JUND,KIF16B,KLF4,LGALS1,LRRFIP1,MALAT1,MGST3,MMP2,MSR1,MT-ND3,OASL,PABPC1,PCNX1,PDE4B,PELI1,PKP2,PLAC8,POR,PSME4,PTPN1,RBPJ,RGCC,RND3,RPL41,RPS12,RPS23,SAMHD1,SERPINB5,SOD2,STAT3,STIP1,THBS1,TNFAIP3,TRHDE,UBC,UTY,WDR74,YWHAZ…	67
Cell-To-Cell Signaling and Interaction,Cellular Movement,Hematological System Development and Function,Immune Cell Trafficking,Inflammatory Response	Recruitment of neutrophils	4.33e-05		-0.736	APOE,CAMP,CD44,CTSC,HSPA1A/HSPA1B,MMP2,PDE4B,S100A8,SOD2	9
Inflammatory Response	Cytotoxic reaction of cells	7.86e-05		-0.728	APOE,APP,CAMP,HMOX1,HSPB1,THBS1	6
Cell-To-Cell Signaling and Interaction,Hematological System Development and Function,Immune Cell Trafficking,Inflammatory Response	Activation of macrophages	1.01e-07		-0.713	APOE,APP,CAMP,CD36,CD44,HMOX1,HSPD1,JUND,KLF4,MSR1,PELI1,SERPING1,STAT3,THBS1	14
Cell Death and Survival	Apoptosis of kidney cancer cell lines	2.66e-05		-0.713	DEFB1,HMOX1,MALAT1,SCD,STAT3	5
Connective Tissue Development and Function,Tissue Morphology	Quantity of connective tissue	4.81e-05		-0.71	APOE,APP,CD36,CD44,CFD,FGF18,HMOX1,HRH1,IGFBP2,KLF4,MMP2,MSR1,NUPR1,PLIN2,PTPN1,SCD,SOD2	17
Cancer,Cellular Movement,Organismal Injury and Abnormalities,Tumor Morphology	Invasion of tumor cells	1.41e-09		-0.705	ADGRE5,CD44,CTSL,HMOX1,KLF4,LGALS1,MMP2,NEDD9,S100A8,SCGB1A1,SERPINB5,STAT3,THBS1	13
Cellular Movement,Hematological System Development and Function,Immune Cell Trafficking	Cellular infiltration by leukocytes	4.66e-11		-0.698	APOE,APP,CD36,CD44,CFD,CTSC,FABP4,HMOX1,HSPB1,HSPD1,LGALS1,MMP2,MSR1,PELI1,PTPN1,RGCC,S100A8,SCGB1A1,SERPING1,STAT3,THBS1,TNFAIP3,TREM1,YWHAZ	24
Cellular Movement	Cell movement of myeloid cells	5.86e-08		-0.687	APOE,APP,CAMP,CD36,CD44,CFD,CTSC,DEFB1,FABP4,HMOX1,HSPB1,LGALS1,MSR1,PDE4B,PTPN1,PVR,S100A8,SCGB1A1,SERPING1,STAT3,THBS1,TNFAIP3,TREM1	23
Cancer,Organismal Injury and Abnormalities	Genitourinary tumor	7.68e-06		-0.684	ADGRE5,AKR1C1/AKR1C2,AKR1C3,ANKDD1A,ANKRD28,APOC1,APOE,APP,ARF6,ARHGAP26,ARMC9,ATP1B1,B3GNT5,C1QC,CAMP,CD163L1,CD36,CD44,CD52,CENPU,COLEC12,CRIP1,CSTB,CTSA,CTSC,CTSL,CYTIP,DAPK1,DDX21,DEFB1,DNAJA4,DPYSL2,FABP4,FGD4,FGF18,HLA-DRA,HLA-DRB5,HMOX1,HRH1,HSPA1A/HSPA1B,HSPA4,HSPA9,HSPB1,HSPD1,HSPE1,HSPH1,IFI6,IGFBP2,IL2RG,JUND,KIF16B,KLF4,LCOR,LGALS1,LRRFIP1,LTA4H,MALAT1,MGST1,MMP2,MSR1,MT-TE,MT1E,MT1G,…	106
Cardiovascular System Development and Function,Cell-To-Cell Signaling and Interaction	Binding of vascular endothelial cells	0.00013		-0.676	ADGRE5,APP,CD36,CD44,CD63,SERPINB5,THBS1	7
Cell Death and Survival	Cell death of liver	2.3e-05		-0.67	APOE,APP,ARF6,HMOX1,HSPD1,JUND,NCL,PTPN1,SCD,SOD2,STAT3	11
Lipid Metabolism,Molecular Transport,Small Molecule Biochemistry	Accumulation of sterol	3.95e-05		-0.665	APOC1,APOE,APP,FABP4,HMOX1,MSR1	6
Cell-To-Cell Signaling and Interaction,Cellular Function and Maintenance,Inflammatory Response	Phagocytosis of blood cells	1.09e-05		-0.656	AHSA1,APP,ARPC2,CAMP,CD36,CD44,HMOX1,MGAT1,MSR1,RGCC,THBS1	11
Cellular Movement	Cellular infiltration by myeloid cells	1.24e-08		-0.64	APOE,APP,CD36,CD44,CFD,CTSC,FABP4,HMOX1,HSPB1,LGALS1,MSR1,PTPN1,S100A8,SCGB1A1,SERPING1,STAT3,TNFAIP3,TREM1	18
Cellular Movement,Hematological System Development and Function,Immune Cell Trafficking,Inflammatory Response	Infiltration by neutrophils	5.12e-08		-0.637	APOE,CD36,CD44,CFD,CTSC,FABP4,HMOX1,HSPB1,LGALS1,S100A8,STAT3,TNFAIP3,TREM1	13
Cell-To-Cell Signaling and Interaction,Hematological System Development and Function,Immune Cell Trafficking,Inflammatory Response	Activation of phagocytes	5.81e-09		-0.623	APOE,APP,CAMP,CD36,CD44,CD63,HMOX1,HRH1,HSPD1,JUND,KLF4,MSR1,MT-ND3,PELI1,S100A8,SERPING1,STAT3,THBS1,TREM1	19
Cellular Function and Maintenance	Engulfment of cells	8.02e-09		-0.608	AHSA1,APOE,APP,ARF6,ARPC2,CAMP,CD36,CD44,CD63,COLEC12,DPYSL2,FGD4,HMOX1,IL2RG,MGAT1,MSR1,NCL,PELI1,PTPN1,RGCC,THBS1,TREM1	22
Cell Death and Survival,Organismal Injury and Abnormalities,Skeletal and Muscular Disorders	Cell death of muscle cells	7.53e-07		-0.584	APOC1,APP,CAMP,HMOX1,HSPB1,HSPD1,HSPE1,JUND,MMP2,NCL,RBM3,SCD,SOD2,STAT3,TNFAIP3	15
Connective Tissue Disorders,Inflammatory Disease,Organismal Injury and Abnormalities,Skeletal and Muscular Disorders	Rheumatic Disease	9.5e-17		-0.581	ADGRE5,APOE,ATP1B1,C1QB,CAMP,CD36,CD44,CFD,CRIP1,CTSA,CTSC,CTSL,DAPK1,DNAJA4,FABP4,FGF18,FTL,HLA-DRA,HLA-DRB5,HMOX1,HRH1,HSPA1A/HSPA1B,HSPD1,HSPE1,IFI6,LGALS1,LST1,MMP2,MSR1,MT1X,MT2A,OASL,PDE4B,PTPN1,RBP4,RBPJ,RGCC,RPS4Y1,S100A8,SAMHD1,SDC2,SERPINB5,SERPING1,SOD2,STAT3,THBS1,TNFAIP3,YWHAZ,ZNF331	49
Free Radical Scavenging	Formation of reactive oxygen species	3.31e-05		-0.581	APOE,APP,CAMP,HMOX1,SOD2,STAT3,YWHAZ	7
Cancer,Organismal Injury and Abnormalities	Malignant genitourinary solid tumor	1.31e-05		-0.577	ADGRE5,AKR1C1/AKR1C2,AKR1C3,ANKDD1A,ANKRD28,APOC1,APOE,APP,ARF6,ARHGAP26,ARMC9,ATP1B1,B3GNT5,C1QC,CAMP,CD163L1,CD36,CD44,CD52,CENPU,COLEC12,CRIP1,CTSA,CTSC,CTSL,CYTIP,DAPK1,DDX21,DEFB1,DNAJA4,DPYSL2,FABP4,FGD4,FGF18,HLA-DRA,HLA-DRB5,HMOX1,HRH1,HSPA1A/HSPA1B,HSPA4,HSPA9,HSPB1,HSPD1,HSPE1,HSPH1,IFI6,IGFBP2,IL2RG,JUND,KIF16B,KLF4,LCOR,LGALS1,LRRFIP1,LTA4H,MALAT1,MGST1,MMP2,MSR1,MT-TE,MT1E,MT1G,MT1X,…	104
Cellular Movement,Immune Cell Trafficking	Leukocyte migration	4.69e-12		-0.566	ADGRE5,APOE,APP,CAMP,CD36,CD44,CD63,CFD,CTSC,CYTIP,DEFB1,DPYSL2,FABP4,HMOX1,HRH1,HSPA1A/HSPA1B,HSPB1,HSPD1,LGALS1,MMP2,MSR1,NEDD9,PDE4B,PELI1,PTPN1,PVR,RGCC,S100A8,SCGB1A1,SERPING1,SOD2,STAT3,THBS1,TNFAIP3,TREM1,YWHAZ	36
Cancer,Organismal Injury and Abnormalities	Tumorigenesis of tissue	5.63e-10		-0.564	ADGRE5,AHSA1,AKR1C1/AKR1C2,AKR1C3,ANKDD1A,ANKRD28,APOC1,APOE,APP,ARF6,ARHGAP26,ARMC9,ARPC2,ATP1B1,ATP1B3,B3GNT5,C1QB,C1QC,C2orf68,CAMP,CCDC138,CD163L1,CD36,CD44,CD52,CD63,CENPU,CFD,CHCHD10,COLEC12,CRIP1,CSTB,CTSA,CTSC,CTSL,CYTIP,DAPK1,DDX21,DEFB1,DNAJA4,DNAJB1,DPYSL2,FABP4,FGD4,FGF18,FTL,GPCPD1,HLA-DRA,HLA-DRB5,HMOX1,HPGD,HRH1,HSPA1A/HSPA1B,HSPA4,HSPA9,HSPB1,HSPD1,HSPE1,HSPH1,IFI6,IFITM10,IGFBP2,…	139
Cell Death and Survival	Cytolysis	3.09e-05		-0.56	APOE,APP,CAMP,CD44,CD52,HMOX1,IL2RG,LGALS1,PTPN1,PVR,TNFAIP3	11
Cancer,Organismal Injury and Abnormalities,Tumor Morphology	Progression of tumor	7.29e-06		-0.557	APOE,CD44,IGFBP2,IL2RG,LGALS1,NEDD9,POR,SERPINB5,SOD2,STAT3,THBS1,YWHAZ	12
Cellular Growth and Proliferation,Lymphoid Tissue Structure and Development	Proliferation of lymphatic system cells	1.41e-08		-0.553	APOE,APP,ARF6,B3GNT5,CAMP,CD36,CD44,CYTIP,FABP4,FTL,HMOX1,HRH1,HSPA1A/HSPA1B,HSPD1,IGFBP2,IL2RG,JUND,KLF4,LGALS1,LST1,PELI1,PVR,SCGB1A1,STAT3,THBS1,TNFAIP3,TREM1	27
Cellular Development,Cellular Growth and Proliferation	Cell proliferation of colorectal cancer cell lines	4.58e-05		-0.547	AHSA1,APP,CD44,HSPB1,IGFBP2,KLF4,NCL,NEDD9,POR,PTPN1,SDC2,STAT3,THBS1	13
Gastrointestinal Disease,Hepatic System Disease,Organismal Injury and Abnormalities	Liver lesion	5.95e-06		-0.536	AHSA1,AKR1C1/AKR1C2,AKR1C3,APOE,APP,ARF6,ATP1B1,ATP1B3,CCDC138,CD163L1,CD36,CD44,CENPU,CHCHD10,CTSA,CTSC,CTSL,FABP4,FTL,GPCPD1,HLA-DRA,HMOX1,HPGD,HRH1,HSPA1A/HSPA1B,HSPA4,HSPA9,HSPB1,HSPD1,HSPH1,IFITM10,IGFBP2,IL2RG,JUND,KIF16B,KLF4,LCOR,LGALS1,LRRFIP1,MGAT1,MMP2,MRPL18,MSR1,MT1E,MT1G,MT1X,MT2A,NCL,NUPR1,OASL,PABPC1,PABPC4,PDE4B,PLD3,PLIN2,POR,PTPN1,PVR,RBP4,RBPJ,RPS27,RPS4Y1,SAMHD1,SCD,SDC2,SERP…	78
Cardiovascular Disease,Cell Death and Survival,Organismal Injury and Abnormalities,Skeletal and Muscular Disorders	Apoptosis of cardiomyocytes	3e-05		-0.519	HMOX1,HSPD1,HSPE1,JUND,MMP2,SCD,SOD2,STAT3,TNFAIP3	9
Cellular Development,Cellular Growth and Proliferation,Hematological System Development and Function,Lymphoid Tissue Structure and Development	Proliferation of immune cells	1.33e-08		-0.507	APOE,ARF6,B3GNT5,CAMP,CD36,CD44,CYTIP,FABP4,FTL,HMOX1,HRH1,HSPA1A/HSPA1B,HSPD1,IGFBP2,IL2RG,JUND,KLF4,LGALS1,LST1,PELI1,PVR,RBPJ,SCGB1A1,STAT3,THBS1,TNFAIP3,TREM1	27
Cancer,Organismal Injury and Abnormalities	Neoplasia of tumor cell lines	0.000113		-0.505	APOC1,ARF6,CD44,DAPK1,HMOX1,IGFBP2,KLF4,MALAT1,MMP2,NEDD9,RBPJ,SERPINB5,SOD2,STAT3,THBS1	15
Cardiovascular Disease,Cell Death and Survival,Organismal Injury and Abnormalities,Skeletal and Muscular Disorders	Cell death of cardiomyocytes	2.56e-06		-0.49	HMOX1,HSPB1,HSPD1,HSPE1,JUND,MMP2,NCL,SCD,SOD2,STAT3,TNFAIP3	11
Cell Death and Survival,Organismal Injury and Abnormalities	Necrosis of vascular endothelial cells	6.51e-11		-0.474	APP,ATP1B3,CD36,HMOX1,HSPD1,KLF4,LGALS1,MALAT1,MMP2,RBP4,S100A8,SERPINB5,THBS1	13
Inflammatory Disease,Inflammatory Response,Organismal Injury and Abnormalities,Respiratory Disease	Inflammation of lung	2.27e-05		-0.472	APOE,ATP1B1,CAMP,CD36,CD44,HMOX1,HRH1,IL2RG,LGALS1,SCGB1A1,STAT3,THBS1,TREM1	13
Cell Death and Survival	Cell death of myeloid cells	7.19e-08		-0.469	APOE,APP,ARF6,CAMP,CD44,FABP4,HMOX1,LGALS1,MSR1,S100A8,SOD2,STAT3,TNFAIP3,TREM1	14
Free Radical Scavenging	Generation of reactive oxygen species	4.57e-06		-0.465	APOE,APP,CAMP,CD36,CSTB,HMOX1,HSPB1,PTPN1,SCD,SERPINB5,SOD2,STAT3	12
Cell Death and Survival,Organismal Injury and Abnormalities,Skeletal and Muscular Disorders	Apoptosis of muscle cells	5.18e-06		-0.458	APOC1,APP,HMOX1,HSPB1,HSPD1,HSPE1,JUND,MMP2,SCD,SOD2,STAT3,TNFAIP3	12
Cancer,Hematological Disease,Organismal Injury and Abnormalities	Hematologic cancer	7.02e-09		-0.456	APOE,APP,ARHGAP26,ARMC9,ATP1B1,C1QC,CCDC138,CD163L1,CD36,CD44,CD52,CD63,CTSC,CTSL,CYTIP,DAPK1,DNAJA4,FABP4,FGD4,HLA-DRA,HMOX1,HSPA1A/HSPA1B,HSPA4,HSPB1,HSPD1,HSPH1,IFI6,IL2RG,JUND,KIF16B,KLF4,LGALS1,LRRFIP1,MALAT1,MGST3,MMP2,MSR1,MT-ND3,OASL,PABPC1,PCNX1,PDE4B,PELI1,PKP2,PLAC8,POR,PSME4,PTPN1,RBPJ,RGCC,RND3,RPL41,RPS12,RPS23,SAMHD1,SERPINB5,SOD2,STAT3,STIP1,THBS1,TNFAIP3,TRHDE,UBC,UTY,WDR74,YWHAZ…	67
Cardiovascular Disease,Organismal Injury and Abnormalities	Vascular lesion	2.78e-09		-0.444	APOE,APP,CD36,CD44,CTSC,CTSL,FABP4,FTL,HMOX1,KLF4,MMP2,MSR1,PLIN2,SCD,STAT3,THBS1,TNFAIP3	17
Cell-To-Cell Signaling and Interaction,Connective Tissue Development and Function	Binding of fibroblast cell lines	0.000132		-0.44	CD44,COLEC12,DAPK1,IL2RG,MSR1,SDC2	6
Cardiovascular Disease,Organismal Injury and Abnormalities	Peripheral vascular disease	3.43e-09		-0.435	ADGRE5,APOE,APP,CD36,CTSA,CTSC,CYTIP,DNAJB1,HRH1,HSPA1A/HSPA1B,HSPA4,HSPB1,HSPH1,KLF4,MALAT1,MSR1,NEDD9,PDE4B,STIP1,THBS1,TREM1	21
Cardiovascular Disease,Neurological Disease,Organismal Injury and Abnormalities	Cerebrovascular dysfunction	0.000121		-0.435	APOE,APP,CD36,HRH1,HSPB1,HSPH1,KLF4,MALAT1,PDE4B,STIP1,THBS1	11
Cell-To-Cell Signaling and Interaction,Embryonic Development	Binding of embryonic cell lines	2.4e-05		-0.414	COLEC12,DAPK1,MSR1,NCL,PTPN1,SDC2	6
Infectious Diseases,Organismal Injury and Abnormalities	Infection by RNA virus	3.37e-09		-0.409	ADGRE5,APOE,APP,ARF6,CD36,CD44,CTSL,DNAJB1,HLA-DRA,HLA-DRB5,HRH1,HSPA1A/HSPA1B,HSPA4,HSPA9,IFI6,IL2RG,LGALS1,MGAT1,MT1X,MT2A,PABPC1,PDE4B,PELI1,PLAC8,POR,PVR,RBP4,S100A8,SAMHD1,SNHG32,STIP1,TNFAIP3,UTY,YWHAZ	34
Immunological Disease,Inflammatory Disease,Organismal Injury and Abnormalities	Immune mediated inflammatory disease	2.3e-16		-0.391	ADGRE5,APOE,ATP1B1,B3GNT5,C1QB,CAMP,CD36,CD44,CD52,CFD,CRIP1,CTSA,CTSC,CTSL,DAPK1,DEFB1,DNAJA4,DPYSL2,FABP4,HLA-DRA,HLA-DRB5,HMOX1,HRH1,HSPA1A/HSPA1B,HSPD1,HSPE1,IFI6,IL2RG,LGALS1,LST1,MMP2,MT1X,MT2A,OASL,PDE4B,PTPN1,RBP4,RGCC,RPS4Y1,S100A8,SAMHD1,SDC2,SERPINB5,SERPING1,SOD2,STAT3,THBS1,TNFAIP3,ZNF331	49
Cellular Movement	Migration of cervical cancer cell lines	9e-05		-0.391	ANKRD28,HMOX1,MGAT1,MMP2,NEDD9,S100A8	6
Molecular Transport	Transport of molecule	6.09e-07		-0.388	AKR1C1/AKR1C2,APOC1,APOE,APP,ARF6,ATP1B1,ATP1B3,CAMP,CD36,CD44,CFD,CTSA,DNAJA4,DPYSL2,FABP4,FTL,HMOX1,HRH1,HSPA9,JUND,KIF16B,LGALS1,MGST1,MSR1,MT2A,NEDD9,PLIN2,PTPN1,RBP4,S100A8,SCD,SLC16A10,SOD2,STAT3,STXBP2,THBS1,TTC39B,YWHAZ	38
Cellular Function and Maintenance	Internalization of cells	4.99e-09		-0.376	AHSA1,APP,ARF6,ARPC2,CAMP,CD36,CD44,COLEC12,FGD4,HMOX1,MGAT1,MSR1,NCL,PELI1,RGCC,THBS1,TREM1	17
Free Radical Scavenging	Synthesis of reactive oxygen species	1.6e-11		-0.375	APOE,APP,CAMP,CD36,CD44,CD52,CHCHD10,CSTB,FTL,HMOX1,HSPA9,HSPB1,HSPD1,JUND,KLF4,MSR1,MT-TE,POR,PTPN1,RBP4,RBPJ,RND3,S100A8,SCD,SERPINB5,SOD2,STAT3,YWHAZ	28
Cell Death and Survival,Organismal Injury and Abnormalities,Skeletal and Muscular Disorders	Cell death of vascular smooth muscle cells	5.64e-05		-0.366	APOC1,APP,CAMP,HMOX1,HSPB1,STAT3	6
Cardiovascular Disease,Organismal Injury and Abnormalities	Atherosclerotic lesion	4.8e-08		-0.35	APOE,APP,CD36,CD44,FABP4,HMOX1,MMP2,MSR1,PLIN2,SCD,THBS1,TNFAIP3	12
Cell Death and Survival,Organismal Injury and Abnormalities	Necrosis of epithelial tissue	3.12e-09		-0.347	APP,ARF6,ATP1B3,CAMP,CD36,CD44,HMOX1,HSPB1,HSPD1,KLF4,LGALS1,MALAT1,MMP2,NCL,PTPN1,RBP4,RBPJ,RND3,S100A8,SCD,SERPINB5,SOD2,STAT3,THBS1,TNFAIP3	25
Cellular Development	Maturation of blood cells	1.2e-05		-0.344	APP,CAMP,CD36,CD44,HLA-DRA,HMOX1,HSPA1A/HSPA1B,HSPA9,HSPD1,STAT3,THBS1	11
Cellular Development,Hematological System Development and Function,Lymphoid Tissue Structure and Development	Maturation of phagocytes	1.52e-05		-0.344	CAMP,CD36,CD44,HMOX1,HSPA1A/HSPA1B,HSPD1,STAT3,THBS1	8
Cellular Movement,Hematological System Development and Function,Immune Cell Trafficking	Cell movement of leukocytes	2.95e-11		-0.339	APOE,APP,CAMP,CD36,CD44,CD63,CFD,CTSC,CYTIP,DEFB1,DPYSL2,FABP4,HMOX1,HRH1,HSPB1,HSPD1,LGALS1,MMP2,MSR1,NEDD9,PDE4B,PELI1,PTPN1,PVR,RGCC,S100A8,SCGB1A1,SERPING1,STAT3,THBS1,TNFAIP3,TREM1,YWHAZ	33
Protein Synthesis	Expression of protein	1.42e-11		-0.333	APP,DAPK1,HSPA1A/HSPA1B,HSPB1,MALAT1,MT-TE,MT-TP,MT-TQ,MT-TV,NCL,PABPC1,PABPC4,RBM3,RPL30,RPL41,RPS23,RPS4Y1,SOD2,STAT3,THBS1	20
Cell Signaling,Small Molecule Biochemistry	Synthesis of nitric oxide	2.7e-06		-0.326	APOE,APP,CAMP,CD36,DNAJB1,HMOX1,HRH1,HSPA4,HSPD1,KLF4,RBP4,SOD2,TNFAIP3,TREM1	14
Cellular Movement	Migration of colorectal cancer cell lines	4.98e-05		-0.317	CAMP,CD44,DPYSL2,KLF4,MALAT1,S100A8,SDC2,STAT3	8
Cellular Development,Cellular Growth and Proliferation,Organ Development,Skeletal and Muscular System Development and Function,Tissue Development	Proliferation of muscle cells	8.05e-06		-0.31	APOE,HMOX1,HSPD1,IGFBP2,KLF4,LRRFIP1,MALAT1,MMP2,PTPN1,RBP4,RBPJ,SERPINB5,STAT3,THBS1,TNFAIP3	15
Cell-To-Cell Signaling and Interaction	Aggregation of cells	2.27e-05		-0.306	APP,ATP1B1,CD36,CD44,CD63,HSPB1,LGALS1,PTPN1,S100A8,STAT3,STXBP2,THBS1,YWHAZ	13
Organismal Injury and Abnormalities	Fibrosis	9.78e-07		-0.299	APOE,ATP1B1,CD36,CD44,CTSA,HLA-DRA,HMOX1,HRH1,HSPB1,IL2RG,JUND,KLF4,LGALS1,MMP2,MSR1,PLAC8,RBPJ,SCD,SCGB1A1,SDC2,SOD2,STAT3,THBS1,TNFAIP3	24
Organismal Injury and Abnormalities,Organismal Survival	Organismal death	4.49e-08		-0.298	AKR1C3,APOC1,APOE,APP,ARF6,ATP1B1,B3GNT5,CAMP,CD36,CD44,CENPU,CSTB,CTSA,DEFB1,DNAJB1,FTL,HMOX1,HPGD,HRH1,HSPB1,HSPE1,IGFBP2,IL2RG,KLF4,LCOR,MALAT1,MGAT1,MGST1,MMP2,MSR1,MT-TV,NUPR1,PDE4B,PELI1,PKP2,PLIN2,POR,PTPN1,PVR,RBM3,RBPJ,S100A8,SCD,SERPINB5,SERPING1,SOD2,STAT3,STIP1,STXBP2,THBS1,TNFAIP3,TREM1,UBC	53
Cancer,Organismal Injury and Abnormalities,Reproductive System Disease	Mammary tumor	4.13e-07		-0.287	AKR1C1/AKR1C2,AKR1C3,APOE,APP,B3GNT5,CAMP,CD44,CENPU,CSTB,CTSC,DAPK1,DPYSL2,FABP4,FGF18,HLA-DRB5,HMOX1,HRH1,HSPA4,HSPA9,HSPB1,HSPD1,IGFBP2,IL2RG,JUND,KLF4,LGALS1,LRRFIP1,MALAT1,MMP2,MSR1,MT-TE,MT1E,MT1G,MT1X,MT2A,NCL,NEDD9,OOEP,PELI1,PKP2,PLIN2,POR,PTPN1,RND3,RSF1,S100A8,SERPINB5,SERPING1,SMIM4,SOD2,STAT3,STIP1,THBS1,UBC,UTY,WDR74,YWHAZ	57
Metabolic Disease,Organismal Injury and Abnormalities	Glucose metabolism disorder	6.84e-10		-0.286	AKR1C3,APOC1,APOE,ATP1B1,ATP1B3,CCDC138,CD36,CD44,CD52,CFD,CRIP1,CTSC,CTSL,FABP4,HLA-DRA,HLA-DRB5,HPGD,HRH1,HSPA1A/HSPA1B,HSPB1,IGFBP2,KLF4,LST1,MGST1,MMP2,MOGAT1,MSR1,MT-TE,MT1G,MT2A,PDE4B,POR,PTPN1,RBP4,RBPJ,RPL41,S100A8,SCD,SERPING1,SNHG32,SOD2,STAT3,THBS1,TTTY14,UTY	45
Cellular Development,Cellular Growth and Proliferation,Hematological System Development and Function,Lymphoid Tissue Structure and Development	Proliferation of lymphocytes	1.26e-08		-0.285	APOE,ARF6,B3GNT5,CAMP,CD36,CD44,CYTIP,FABP4,FTL,HMOX1,HRH1,HSPA1A/HSPA1B,HSPD1,IGFBP2,IL2RG,JUND,KLF4,LGALS1,LST1,PELI1,PVR,SCGB1A1,STAT3,THBS1,TNFAIP3,TREM1	26
Cellular Development,Cellular Growth and Proliferation,Organ Development,Skeletal and Muscular System Development and Function,Tissue Development	Proliferation of smooth muscle cells	2.23e-06		-0.283	APOE,HMOX1,HSPD1,IGFBP2,KLF4,LRRFIP1,MMP2,PTPN1,RBPJ,SERPINB5,STAT3,THBS1,TNFAIP3	13
Free Radical Scavenging	Metabolism of reactive oxygen species	8.57e-12		-0.282	APOE,APP,CAMP,CD36,CD44,CD52,CHCHD10,CSTB,FTL,HMOX1,HSPA9,HSPB1,HSPD1,IFI6,JUND,KLF4,MSR1,MT-TE,POR,PTPN1,RBP4,RBPJ,RND3,S100A8,SCD,SERPINB5,SOD2,STAT3,YWHAZ	29
Cancer,Organismal Injury and Abnormalities	Formation of solid tumor	3.37e-05		-0.275	ADGRE5,AKR1C1/AKR1C2,ANKDD1A,ANKRD28,APOC1,APOE,APP,ARF6,ARHGAP26,ARMC9,ARPC2,ATP1B1,ATP1B3,B3GNT5,C1QB,C1QC,C2orf68,CAMP,CD163L1,CD36,CD44,CENPU,COLEC12,CRIP1,CTSA,CTSC,CTSL,CYTIP,DAPK1,DDX21,DEFB1,DNAJA4,DNAJB1,DPYSL2,FABP4,FGD4,FGF18,GPCPD1,HMOX1,HPGD,HRH1,HSPA1A/HSPA1B,HSPA4,HSPA9,HSPB1,HSPD1,HSPE1,HSPH1,IFI6,IGFBP2,IL2RG,KIF16B,KLF4,LCOR,LGALS1,LRRFIP1,LTA4H,MALAT1,MGAT1,MGST1,MGST3,MMP2,MRP…	117
Cancer,Organismal Injury and Abnormalities	Advanced malignant tumor	1.3e-11		-0.27	ADGRE5,AKR1C1/AKR1C2,AKR1C3,APOC1,APOE,ARF6,CD36,CD44,CD52,COLEC12,CSTB,DAPK1,DPYSL2,FGF18,FTL,HMOX1,HRH1,HSPA1A/HSPA1B,HSPA4,IGFBP2,IL2RG,KLF4,LGALS1,MALAT1,MMP2,NEDD9,POR,RBPJ,RGCC,RSF1,SCD,SCGB1A1,SERPINB5,SERPING1,SOD2,STAT3,THBS1,TNFAIP3,YWHAZ	39
Cancer,Organismal Injury and Abnormalities	Invasive tumor	6.65e-10		-0.27	ADGRE5,AKR1C1/AKR1C2,AKR1C3,APOC1,APOE,ARF6,CD36,CD44,CENPU,COLEC12,CSTB,DAPK1,DPYSL2,FABP4,FTL,HMOX1,HRH1,HSPA1A/HSPA1B,HSPA4,IGFBP2,IL2RG,KLF4,LGALS1,MALAT1,MMP2,MT1E,NEDD9,POR,PTPN1,RBPJ,RSF1,SCD,SCGB1A1,SERPINB5,SERPING1,SOD2,STAT3,THBS1,TNFAIP3,YWHAZ	40
Cancer,Organismal Injury and Abnormalities	Metastasis	1.39e-09		-0.27	ADGRE5,AKR1C1/AKR1C2,AKR1C3,APOC1,APOE,ARF6,CD36,CD44,COLEC12,CSTB,DAPK1,DPYSL2,FTL,HMOX1,HRH1,HSPA1A/HSPA1B,HSPA4,IGFBP2,IL2RG,KLF4,LGALS1,MALAT1,MMP2,NEDD9,POR,RBPJ,SCD,SCGB1A1,SERPINB5,SOD2,STAT3,THBS1,TNFAIP3,YWHAZ	34
Cancer,Organismal Injury and Abnormalities	Neoplasia of cells	4.53e-09		-0.266	ADGRE5,APOC1,APOE,APP,ARF6,ARHGAP26,ARMC9,ATP1B1,C1QC,CCDC138,CD163L1,CD36,CD44,CD52,CD63,CENPU,CFD,CTSA,CTSC,CTSL,CYTIP,DAPK1,DNAJA4,FABP4,FGD4,FGF18,HLA-DRA,HLA-DRB5,HMOX1,HSPA1A/HSPA1B,HSPA4,HSPA9,HSPB1,HSPD1,HSPH1,IFI6,IGFBP2,IL2RG,JUND,KIF16B,KLF4,LCOR,LGALS1,LRRFIP1,MALAT1,MGST3,MMP2,MOGAT1,MRPL18,MSR1,MT-ND3,MT1E,MT1G,NCL,NEDD9,NUPR1,OASL,PABPC1,PABPC4,PCNX1,PDE4B,PKP2,PLAC8,POR,PSME4,PTPN…	91
Cell Death and Survival	Cell viability of tumor cell lines	8.99e-05		-0.261	APOE,APP,CAMP,CD44,HMOX1,HSPA1A/HSPA1B,HSPA4,HSPA9,HSPB1,HSPH1,IGFBP2,KLF4,MALAT1,MGAT1,NUPR1,PSME4,PTPN1,RSF1,S100A8,SCD,SERPINB5,SOD2,STAT3,STIP1	24
Cell-To-Cell Signaling and Interaction,Cellular Movement	Recruitment of cells	1.25e-09		-0.249	ADGRE5,APOE,APP,CAMP,CD36,CD44,CD63,CTSC,HMOX1,HRH1,HSPA1A/HSPA1B,LGALS1,MMP2,PDE4B,PELI1,S100A8,SOD2,STAT3,THBS1	19
Cell Death and Survival,Organismal Injury and Abnormalities	Apoptosis of vascular endothelial cells	2.1e-10		-0.246	APP,ATP1B3,CD36,HMOX1,HSPD1,KLF4,LGALS1,MMP2,RBP4,S100A8,SERPINB5,THBS1	12
Lipid Metabolism,Small Molecule Biochemistry	Synthesis of lipid	3.52e-06		-0.242	AKR1C1/AKR1C2,AKR1C3,APOC1,APOE,APP,ARF6,B3GNT5,CAMP,CD36,FABP4,HMOX1,HPGD,HRH1,IGFBP2,KLF4,LTA4H,MGST3,MMP2,MOGAT1,PKP2,PLIN2,POR,SCD,STAT3	24
Cell-To-Cell Signaling and Interaction,Hematological System Development and Function	Activation of myeloid cells	9.53e-09		-0.238	APOE,APP,CAMP,CD36,CD44,CD63,HMOX1,HSPD1,JUND,KLF4,MSR1,MT-ND3,PELI1,S100A8,SERPING1,STAT3,THBS1,TREM1	18
Cellular Movement,Hematological System Development and Function,Immune Cell Trafficking,Inflammatory Response	Cell movement of neutrophils	3.87e-08		-0.233	APOE,APP,CAMP,CD36,CD44,CFD,CTSC,DEFB1,FABP4,HMOX1,HSPB1,LGALS1,PDE4B,S100A8,STAT3,TNFAIP3,TREM1	17
Cellular Movement,Hematological System Development and Function,Immune Cell Trafficking	Cellular infiltration by granulocytes	1.39e-08		-0.232	APOE,CD36,CD44,CFD,CTSC,FABP4,HMOX1,HSPB1,LGALS1,MSR1,S100A8,SCGB1A1,STAT3,TNFAIP3,TREM1	15
Inflammatory Response	Immune response of cells	2.28e-07		-0.217	AHSA1,APOE,APP,ARF6,ARPC2,CAMP,CD36,CD44,COLEC12,HMOX1,HRH1,HSPB1,IL2RG,LGALS1,MGAT1,MSR1,PELI1,RGCC,S100A8,STAT3,THBS1,TREM1	22
Cell-To-Cell Signaling and Interaction,Cellular Movement,Hematological System Development and Function,Immune Cell Trafficking,Inflammatory Response	Recruitment of phagocytes	8.41e-08		-0.21	APOE,APP,CAMP,CD36,CD44,CTSC,HSPA1A/HSPA1B,LGALS1,MMP2,PDE4B,S100A8,SOD2,STAT3,THBS1	14
Cell-To-Cell Signaling and Interaction,Cellular Movement	Recruitment of myeloid cells	3.61e-08		-0.206	ADGRE5,APOE,APP,CAMP,CD36,CD44,CTSC,HSPA1A/HSPA1B,LGALS1,MMP2,PDE4B,S100A8,SOD2,STAT3,THBS1	15
Cell-To-Cell Signaling and Interaction	Adhesion of vascular cells	3.04e-05		-0.206	ADGRE5,APP,CD36,CD44,CD63,SERPINB5,THBS1	7
Cellular Function and Maintenance,Inflammatory Response	Phagocytosis	1.84e-06		-0.196	AHSA1,APP,ARF6,ARPC2,CAMP,CD36,CD44,COLEC12,HMOX1,IL2RG,MGAT1,MSR1,PELI1,RGCC,THBS1,TREM1	16
Cellular Movement,Hematological System Development and Function,Immune Cell Trafficking,Inflammatory Response	Chemotaxis of leukocytes	0.000139		-0.17	APOE,APP,CAMP,DEFB1,HRH1,HSPD1,LGALS1,NEDD9,PDE4B,S100A8,THBS1,TREM1	12
Cellular Development,Cellular Growth and Proliferation,Hematological System Development and Function,Hematopoiesis,Lymphoid Tissue Structure and Development,Tissue Development	Leukopoiesis	6.13e-05		-0.169	APP,C1QC,CAMP,CD36,CD44,DNAJB1,HLA-DRA,HRH1,HSPA9,HSPD1,IL2RG,KLF4,LGALS1,MSR1,NUPR1,PLAC8,RBPJ,RGCC,STAT3,TNFAIP3,TREM1	21
Cancer,Organismal Injury and Abnormalities	Metastasis of tumor cell lines	3.52e-05		-0.155	APOC1,ARF6,CD44,DAPK1,HMOX1,MALAT1,MMP2,NEDD9,RBPJ,SERPINB5,SOD2,STAT3,THBS1	13
Cancer,Organismal Injury and Abnormalities,Reproductive System Disease,Tumor Morphology	Invasion of mammary tumor	2.66e-05		-0.152	CD44,MMP2,S100A8,SERPINB5,STAT3	5
Cancer,Organismal Injury and Abnormalities	Breast or colorectal cancer	0.000106		-0.152	ADGRE5,AKR1C1/AKR1C2,AKR1C3,ANKRD28,APOC1,APOE,APP,B3GNT5,C1QB,C1QC,CAMP,CD36,CD44,CENPU,COLEC12,CRIP1,CTSA,CTSC,CTSL,CYTIP,DAPK1,DDX21,DNAJA4,DPYSL2,FABP4,FGD4,FGF18,HLA-DRB5,HMOX1,HRH1,HSPA4,HSPA9,HSPB1,HSPD1,HSPE1,IGFBP2,IL2RG,JUND,KLF4,LCOR,LGALS1,LRRFIP1,MALAT1,MGST3,MMP2,MRPL18,MT-TE,MT1E,MT1G,MT1X,MT2A,NCL,NEDD9,OOEP,PABPC1,PABPC4,PCNX1,PDE4B,PELI1,PKP2,PLIN2,POR,PSME4,PTPN1,PVR,RBP4,RND3,…	86
Inflammatory Disease,Ophthalmic Disease,Organismal Injury and Abnormalities	Ophthalmia	6.29e-06		-0.146	CSTB,HRH1,HSPD1,LGALS1,PDE4B,RPS12,S100A8,THBS1,TREM1	9
Cancer,Organismal Injury and Abnormalities	Lymphoreticular neoplasm	3.16e-08		-0.145	APP,ARHGAP26,ARMC9,ATP1B1,CD36,CD44,CD52,CD63,CTSL,CYTIP,DAPK1,DNAJA4,FABP4,FGD4,HLA-DRA,HMOX1,HSPA1A/HSPA1B,HSPA4,HSPD1,HSPH1,IFI6,IL2RG,JUND,KLF4,LGALS1,LRRFIP1,MGST3,MMP2,MSR1,OASL,PABPC1,PCNX1,PDE4B,PKP2,PLAC8,POR,PSME4,PTPN1,RBPJ,RGCC,RND3,RPL41,RPS12,RPS23,SAMHD1,SERPINB5,SOD2,STAT3,STIP1,THBS1,TNFAIP3,TRHDE,UBC,YWHAZ,ZNF331	55
Cancer,Organismal Injury and Abnormalities	Benign solid tumor	1.29e-08		-0.124	ADGRE5,APOC1,APOE,APP,CD44,CFD,CTSC,DAPK1,FABP4,HMOX1,HSPA9,KLF4,LGALS1,MALAT1,MGAT1,MGST1,MMP2,PLD3,POR,RBP4,RND3,S100A8,SCD,SCGB1A1,SMIM4,SOD2,STAT3,THBS1,TNFAIP3	29
Cancer,Organismal Injury and Abnormalities	Development of benign tumor	1.23e-05		-0.124	APOE,APP,CD44,DAPK1,FABP4,HMOX1,HSPA9,KLF4,LGALS1,MGAT1,RBP4,RND3,S100A8,SCGB1A1,SMIM4,STAT3,THBS1,TNFAIP3	18
Cancer,Organismal Injury and Abnormalities	Intraabdominal organ tumor	4.85e-08		-0.121	ADGRE5,AHSA1,AKR1C1/AKR1C2,AKR1C3,ANKDD1A,ANKRD28,APOC1,APOE,APP,ARF6,ARHGAP26,ARMC9,ATP1B1,ATP1B3,B3GNT5,C1QB,C1QC,C2orf68,CAMP,CCDC138,CD163L1,CD36,CD44,CD52,CD63,CENPU,CFD,CHCHD10,COLEC12,CRIP1,CSTB,CTSA,CTSC,CTSL,CYTIP,DAPK1,DDX21,DEFB1,DNAJA4,DPYSL2,FABP4,FGD4,FGF18,FTL,GPCPD1,HLA-DRA,HLA-DRB5,HMOX1,HPGD,HRH1,HSPA1A/HSPA1B,HSPA4,HSPA9,HSPB1,HSPD1,HSPE1,HSPH1,IFI6,IFITM10,IGFBP2,IL2RG,KIF16B,…	131
Cancer,Organismal Injury and Abnormalities	Extracranial solid tumor	5.13e-09		-0.117	ADGRE5,AHSA1,AKR1C1/AKR1C2,AKR1C3,ANKDD1A,ANKRD28,APOC1,APOE,APP,ARF6,ARHGAP26,ARMC9,ARPC2,ATP1B1,ATP1B3,B3GNT5,C1QB,C1QC,C2orf68,CAMP,CCDC138,CD163L1,CD36,CD44,CD52,CD63,CENPU,CFD,CHCHD10,COLEC12,CRIP1,CSTB,CTSA,CTSC,CTSL,CYTIP,DAPK1,DDX21,DEFB1,DNAJA4,DNAJB1,DPYSL2,FABP4,FGD4,FGF18,FTL,GPCPD1,HLA-DRA,HLA-DRB5,HMOX1,HPGD,HRH1,HSPA1A/HSPA1B,HSPA4,HSPA9,HSPB1,HSPD1,HSPE1,HSPH1,IFI6,IFITM10,IGFBP2,…	140
Cancer,Organismal Injury and Abnormalities	Neoplasia of colorectal cancer cell lines	4.39e-05		-0.115	CD44,IGFBP2,KLF4,RBPJ,STAT3,THBS1	6
Endocrine System Disorders,Metabolic Disease,Organismal Injury and Abnormalities	Insulin resistance	2.91e-08		-0.112	APOC1,APOE,CD36,CFD,FABP4,HRH1,MOGAT1,MT-TE,PTPN1,RBP4,RBPJ,RPL41,S100A8,SCD,SOD2,STAT3,THBS1	17
Cancer,Organismal Injury and Abnormalities	Extrapancreatic malignant tumor	8.54e-11		-0.092	ADGRE5,AHSA1,AKR1C1/AKR1C2,AKR1C3,ANKDD1A,ANKRD28,APOC1,APOE,APP,ARF6,ARHGAP26,ARMC9,ARPC2,ATP1B1,ATP1B3,B3GNT5,C1QB,C1QC,C2orf68,CAMP,CCDC138,CD163L1,CD36,CD44,CD52,CD63,CENPU,CFD,CHCHD10,COLEC12,CRIP1,CSTB,CTSA,CTSC,CTSL,CYTIP,DAPK1,DDX21,DEFB1,DNAJA4,DNAJB1,DPYSL2,FABP4,FGD4,FGF18,FTL,GPCPD1,HLA-DRA,HLA-DRB5,HMOX1,HPGD,HRH1,HSPA1A/HSPA1B,HSPA4,HSPA9,HSPB1,HSPD1,HSPE1,HSPH1,IFI6,IFITM10,IGFBP2,…	140
Free Radical Scavenging,Molecular Transport	Quantity of reactive oxygen species	4.35e-06		-0.071	APOE,APP,CD44,CTSA,DNAJB1,HMOX1,HSPA4,HSPA9,MGST3,NUPR1,SERPINB5,SOD2	12
Cancer,Organismal Injury and Abnormalities	Breast or pancreatic cancer	1.1e-06		-0.068	AKR1C1/AKR1C2,AKR1C3,ANKDD1A,APOC1,APOE,APP,ARF6,ARMC9,B3GNT5,CD163L1,CD36,CD44,CD63,CENPU,COLEC12,CSTB,CTSC,CYTIP,DAPK1,DPYSL2,FABP4,FGF18,HLA-DRA,HLA-DRB5,HMOX1,HRH1,HSPA9,HSPB1,HSPD1,HSPE1,IGFBP2,IL2RG,JUND,KIF16B,KLF4,LCOR,LGALS1,LRRFIP1,LTA4H,MALAT1,MMP2,MSR1,MT-TE,MT1E,MT1G,MT1X,MT2A,NCL,NEDD9,OOEP,PABPC1,PELI1,PKP2,PLAC8,PLIN2,POR,PSME4,PTPN1,RGCC,RND3,RSF1,S100A8,SCD,SERPINB5,SERPING1,SMA…	78
Cancer,Organismal Injury and Abnormalities	Malignant neoplasm of retroperitoneum	3.56e-05		-0.068	AKR1C1/AKR1C2,ANKDD1A,APOC1,APP,ARHGAP26,ARMC9,CD163L1,CD44,CD63,CENPU,COLEC12,CSTB,CTSL,CYTIP,DAPK1,DEFB1,FABP4,HLA-DRA,HMOX1,HRH1,HSPA9,IGFBP2,IL2RG,KLF4,LCOR,LGALS1,LRRFIP1,LTA4H,MALAT1,MMP2,MT1E,MT1G,NCL,OOEP,PABPC1,PDE4B,PLAC8,PLIN2,POR,RSF1,S100A8,SAMHD1,SCD,SERPINB5,SERPING1,SMAP2,SMIM4,SOD2,STAT3,STXBP2,THBS1,TREM1,YWHAZ	53
Lipid Metabolism,Molecular Transport,Small Molecule Biochemistry	Concentration of fatty acid	0.000103		-0.058	APOC1,APOE,APP,CAMP,CD36,FABP4,HMOX1,HPGD,HRH1,LTA4H,PLIN2,SCD	12
Cell Death and Survival,Organismal Injury and Abnormalities	Cell death of epithelial cells	2.09e-05		-0.045	APP,ARF6,CAMP,CD36,CD44,HMOX1,HSPB1,HSPD1,MMP2,NCL,PTPN1,RND3,SCD,SERPINB5,SOD2,STAT3,TNFAIP3	17
Molecular Transport	Transport of heavy metal	6.19e-05		-0.044	APP,FTL,HMOX1,HRH1,JUND,MT2A,NEDD9,SOD2	8
Cancer,Organismal Injury and Abnormalities	Adenocarcinoma	0.000126		-0.042	ADGRE5,AHSA1,AKR1C1/AKR1C2,AKR1C3,ANKDD1A,ANKRD28,APOC1,APOE,APP,ARF6,ARHGAP26,ARMC9,ATP1B1,ATP1B3,B3GNT5,C1QB,C1QC,CCDC138,CD163L1,CD36,CD44,CD63,CENPU,CFD,CHCHD10,COLEC12,CSTB,CTSA,CTSC,CTSL,CYTIP,DAPK1,DDX21,DEFB1,DNAJA4,DPYSL2,FABP4,FGD4,FGF18,HLA-DRA,HLA-DRB5,HMOX1,HPGD,HRH1,HSPA1A/HSPA1B,HSPA4,HSPA9,HSPB1,HSPD1,HSPE1,HSPH1,IFI6,IGFBP2,IL2RG,KIF16B,KLF4,LCOR,LGALS1,LRRFIP1,LST1,LTA4H,MALAT1,…	117
Cellular Development,Hematological System Development and Function,Lymphoid Tissue Structure and Development	Maturation of leukocytes	1.79e-05		-0.037	APP,CAMP,CD36,CD44,HLA-DRA,HMOX1,HSPA1A/HSPA1B,HSPD1,STAT3,THBS1	10
Cellular Development,Hematological System Development and Function,Lymphoid Tissue Structure and Development	Maturation of dendritic cells	4.95e-05		-0.037	CAMP,CD36,CD44,HMOX1,HSPA1A/HSPA1B,HSPD1,THBS1	7
Cellular Function and Maintenance	Engulfment of tumor cell lines	2.1e-05		-0.033	AHSA1,APOE,ARF6,ARPC2,CD36,CD44,HMOX1,MGAT1,NCL,PELI1	10
Cell Death and Survival	Cell death of macrophages	3.03e-06		-0.021	APOE,APP,FABP4,HMOX1,MSR1,SOD2,STAT3,TNFAIP3,TREM1	9
Cell-To-Cell Signaling and Interaction,Cellular Function and Maintenance,Inflammatory Response	Phagocytosis of cells	2.18e-06		-0.01	AHSA1,APP,ARF6,ARPC2,CAMP,CD36,CD44,COLEC12,HMOX1,IL2RG,MGAT1,MSR1,PELI1,RGCC,THBS1	15
Immunological Disease,Organismal Injury and Abnormalities	Hypersensitive reaction	1.58e-11		0	APOE,ATP1B1,CAMP,CD44,CD63,CTSL,CYTIP,DEFB1,DPYSL2,FABP4,HLA-DRA,HLA-DRB5,HRH1,HSPA1A/HSPA1B,IL2RG,LGALS1,LTA4H,PDE4B,S100A8,SOD2,STXBP2,TNFAIP3,ZNF331	23
Protein Synthesis	Translation of protein	9.58e-11		0	APP,DAPK1,HSPA1A/HSPA1B,HSPB1,MALAT1,MT-TE,MT-TP,MT-TQ,MT-TV,NCL,PABPC1,PABPC4,RBM3,RPL30,RPL41,RPS23,RPS4Y1	17
Infectious Diseases,Organismal Injury and Abnormalities	Infection of mammalia	3.2e-06		0	ADGRE5,APOE,CAMP,CD36,CD44,CFD,HMOX1,IL2RG,MMP2,MSR1,PLAC8,RBPJ,SAMHD1	13
Inflammatory Response,Organismal Injury and Abnormalities,Respiratory Disease	Inflammation of respiratory system component	1.98e-05		0	APOE,ATP1B1,CAMP,CD36,CD44,HMOX1,HRH1,IL2RG,LGALS1,LTA4H,PDE4B,SCGB1A1,SERPINB5,SERPING1,STAT3,THBS1,TREM1	17
Cellular Movement	Extravasation	3.9e-05		0	CD44,CD63,CSTB,CYTIP,PVR,SERPINB5,TREM1	7
Cancer,Organismal Injury and Abnormalities	Adenoma	4.07e-05		0	APOE,APP,CD44,DAPK1,FABP4,HMOX1,HSPA9,LGALS1,MGAT1,RBP4,RND3,S100A8,SCGB1A1,STAT3,THBS1	15
Cellular Movement	Extravasation of cells	5.64e-05		0	CD44,CD63,CSTB,CYTIP,PVR,SERPINB5	6
Cancer,Gastrointestinal Disease,Organismal Injury and Abnormalities	Malignant neoplasm of large intestine	7.47e-05		0	ADGRE5,AHSA1,AKR1C1/AKR1C2,AKR1C3,ANKDD1A,ANKRD28,APOC1,APOE,APP,ARF6,ARHGAP26,ARMC9,ATP1B1,ATP1B3,B3GNT5,C1QB,C1QC,CAMP,CCDC138,CD163L1,CD36,CD44,CENPU,CFD,CHCHD10,COLEC12,CRIP1,CTSA,CTSC,CTSL,CYTIP,DAPK1,DDX21,DNAJA4,DPYSL2,FABP4,FGD4,FGF18,HLA-DRA,HLA-DRB5,HMOX1,HPGD,HRH1,HSPA4,HSPA9,HSPB1,HSPD1,HSPE1,HSPH1,IFI6,IGFBP2,IL2RG,KIF16B,KLF4,LCOR,LRRFIP1,LST1,LTA4H,MGAT1,MGST3,MMP2,MRPL18,MSR1,MT1E…	106
Cancer,Gastrointestinal Disease,Organismal Injury and Abnormalities	Gastrointestinal tract cancer	0.000121		0	ADGRE5,AHSA1,AKR1C1/AKR1C2,AKR1C3,ANKDD1A,ANKRD28,APOC1,APOE,APP,ARF6,ARHGAP26,ARMC9,ATP1B1,ATP1B3,B3GNT5,C1QB,C1QC,C2orf68,CAMP,CCDC138,CD163L1,CD36,CD44,CD63,CENPU,CFD,CHCHD10,COLEC12,CRIP1,CSTB,CTSA,CTSC,CTSL,CYTIP,DAPK1,DDX21,DNAJA4,DPYSL2,FABP4,FGD4,FGF18,HLA-DRA,HLA-DRB5,HMOX1,HPGD,HRH1,HSPA4,HSPA9,HSPB1,HSPD1,HSPE1,HSPH1,IFI6,IGFBP2,IL2RG,KIF16B,KLF4,LCOR,LGALS1,LRRFIP1,LST1,LTA4H,MGAT1,MG…	111
Cell Death and Survival	Apoptosis of vascular cells	1.21e-11		0.019	APOC1,APP,ATP1B3,CD36,HMOX1,HSPB1,HSPD1,KLF4,LGALS1,MMP2,RBP4,S100A8,SERPINB5,STAT3,THBS1	15
Cancer,Organismal Injury and Abnormalities	Incidence of tumor	8.95e-05		0.021	ADGRE5,AKR1C1/AKR1C2,ANKDD1A,ANKRD28,APOC1,APOE,APP,ARF6,ARHGAP26,ARMC9,ATP1B3,B3GNT5,C1QC,C2orf68,CAMP,CD163L1,CD36,CD44,CENPU,COLEC12,CRIP1,CTSA,CTSC,CTSL,CYTIP,DAPK1,DDX21,DEFB1,DNAJA4,DPYSL2,FABP4,FGD4,FGF18,HMOX1,HPGD,HRH1,HSPA1A/HSPA1B,HSPA4,HSPA9,HSPB1,HSPD1,HSPE1,HSPH1,IFI6,IGFBP2,IL2RG,KIF16B,KLF4,LCOR,LGALS1,LRRFIP1,LTA4H,MALAT1,MGAT1,MGST1,MGST3,MMP2,MRPL18,MSR1,MT1E,MT1G,NCL,NEDD9,OAS…	106
Cardiovascular System Development and Function,Cell-To-Cell Signaling and Interaction	Binding of endothelial cells	6.46e-05		0.024	ADGRE5,APP,ARF6,CD36,CD44,CD63,SERPINB5,SERPING1,THBS1	9
Cell Death and Survival	Cell death of phagocytes	1.61e-06		0.046	APOE,APP,CAMP,CD44,FABP4,HMOX1,MSR1,S100A8,SOD2,STAT3,TNFAIP3,TREM1	12
Cancer,Gastrointestinal Disease,Organismal Injury and Abnormalities	Digestive organ tumor	3e-07		0.058	ADGRE5,AHSA1,AKR1C1/AKR1C2,AKR1C3,ANKDD1A,ANKRD28,APOC1,APOE,APP,ARF6,ARHGAP26,ARMC9,ATP1B1,ATP1B3,B3GNT5,C1QB,C1QC,C2orf68,CAMP,CCDC138,CD163L1,CD36,CD44,CD63,CENPU,CFD,CHCHD10,COLEC12,CRIP1,CSTB,CTSA,CTSC,CTSL,CYTIP,DAPK1,DDX21,DNAJA4,DPYSL2,FABP4,FGD4,FGF18,FTL,GPCPD1,HLA-DRA,HLA-DRB5,HMOX1,HPGD,HRH1,HSPA1A/HSPA1B,HSPA4,HSPA9,HSPB1,HSPD1,HSPE1,HSPH1,IFI6,IFITM10,IGFBP2,IL2RG,KIF16B,KLF4,LCOR,L…	126
Lipid Metabolism,Small Molecule Biochemistry	Biosynthesis of polyunsaturated fatty acids	2.52e-05		0.06	APOE,APP,CAMP,CD36,HMOX1,HPGD,HRH1,LTA4H,MGST3,SCD,STAT3	11
Cellular Assembly and Organization	Quantity of filaments	8.04e-05		0.076	APOE,APP,MT2A,PVR,RND3,SOD2,STAT3	7
Cancer,Gastrointestinal Disease,Organismal Injury and Abnormalities	Growth of digestive organ tumor	7.48e-05		0.091	CD44,FGF18,HPGD,RBPJ,SDC2,STAT3,THBS1	7
Cancer,Organismal Injury and Abnormalities	Abdominal cancer	2.23e-07		0.109	ADGRE5,AHSA1,AKR1C1/AKR1C2,AKR1C3,ANKDD1A,ANKRD28,APOC1,APOE,APP,ARF6,ARHGAP26,ARMC9,ATP1B1,ATP1B3,B3GNT5,C1QB,C1QC,C2orf68,CAMP,CCDC138,CD163L1,CD36,CD44,CD52,CD63,CENPU,CFD,CHCHD10,COLEC12,CRIP1,CSTB,CTSA,CTSC,CTSL,CYTIP,DAPK1,DDX21,DEFB1,DNAJA4,DPYSL2,FABP4,FGD4,FGF18,FTL,HLA-DRA,HLA-DRB5,HMOX1,HPGD,HRH1,HSPA1A/HSPA1B,HSPA4,HSPA9,HSPB1,HSPD1,HSPE1,HSPH1,IFI6,IFITM10,IGFBP2,IL2RG,KIF16B,KLF4,LC…	130
Cellular Movement	Chemotaxis	2.24e-05		0.111	APOE,APP,CAMP,CD36,CD44,DEFB1,HRH1,HSPB1,HSPD1,LGALS1,MMP2,NEDD9,PDE4B,S100A8,STAT3,THBS1,TREM1	17
Cellular Movement,Hematological System Development and Function,Immune Cell Trafficking	Homing of leukocytes	1.27e-05		0.117	APOE,APP,CAMP,CD44,DEFB1,HRH1,HSPD1,LGALS1,NEDD9,PDE4B,S100A8,STAT3,THBS1,TREM1	14
Cell Death and Survival	Apoptosis	3.03e-10		0.118	AHSA1,APOC1,APOE,APP,ARF6,ATP1B3,CAMP,CD36,CD44,CRIP1,CSTB,CTSA,CTSL,DAPK1,DEFB1,DNAJB1,HMOX1,HPGD,HSPA1A/HSPA1B,HSPA4,HSPA9,HSPB1,HSPD1,HSPE1,HSPH1,IFI6,IL2RG,JUND,KLF4,LGALS1,MALAT1,MMP2,MSR1,MT2A,NCL,NEDD9,NUPR1,PDE4B,PELI1,PKP2,PLAC8,PLIN2,POR,PSME4,PTPN1,RBM3,RBP4,RBPJ,RND3,RPS27,S100A8,SCD,SDC2,SERPINB5,SOD2,STAT3,STIP1,THBS1,TNFAIP3,TREM1,YWHAZ	61
Cell-To-Cell Signaling and Interaction,Cellular Movement,Hematological System Development and Function,Immune Cell Trafficking	Recruitment of granulocytes	7.6e-08		0.134	ADGRE5,APOE,CAMP,CD44,CTSC,HSPA1A/HSPA1B,LGALS1,MMP2,PDE4B,S100A8,SOD2,STAT3,THBS1	13
Cancer,Gastrointestinal Disease,Organismal Injury and Abnormalities	Hepato-pancreato-biliary cancer	1.64e-07		0.134	AKR1C1/AKR1C2,ANKDD1A,APOC1,APOE,ARMC9,ATP1B1,ATP1B3,CCDC138,CD163L1,CD36,CD44,CD63,CENPU,CHCHD10,COLEC12,CSTB,CTSA,CTSC,CTSL,CYTIP,DAPK1,FGF18,FTL,HLA-DRA,HLA-DRB5,HMOX1,HRH1,HSPA1A/HSPA1B,HSPA4,HSPA9,HSPD1,HSPH1,IFITM10,IGFBP2,IL2RG,KIF16B,KLF4,LCOR,LGALS1,LRRFIP1,LTA4H,MGAT1,MMP2,MSR1,MT1E,MT1G,MT1X,MT2A,NCL,NUPR1,OASL,OOEP,PABPC1,PABPC4,PDE4B,PELI1,PKP2,PLAC8,PLD3,PLIN2,POR,PSME4,PTPN1,PVR,RB…	87
Infectious Diseases,Organismal Injury and Abnormalities	Viral Infection	6.2e-16		0.141	ADGRE5,APOC1,APOE,APP,ARF6,ATP1B1,ATP1B3,CAMP,CD36,CD44,CD63,CTSL,DEFB1,DNAJB1,FTL,HLA-DRA,HLA-DRB5,HMOX1,HPGD,HRH1,HSPA1A/HSPA1B,HSPA4,HSPA9,HSPD1,IFI6,IL2RG,LGALS1,LTA4H,MGAT1,MSR1,MT1X,MT2A,NCL,OASL,PABPC1,PDE4B,PELI1,PLAC8,POR,PTPN1,PVR,RBP4,RBPJ,RPS23,RPS4Y1,S100A8,SAMHD1,SCD,SDC2,SNHG32,STAT3,STIP1,STXBP2,TNFAIP3,TREM1,UTY,YWHAZ	57
Cellular Movement,Hematological System Development and Function,Immune Cell Trafficking	Cell movement of granulocytes	2.25e-08		0.143	APOE,APP,CAMP,CD36,CD44,CFD,CTSC,DEFB1,FABP4,HMOX1,HSPB1,LGALS1,MSR1,PDE4B,S100A8,SCGB1A1,STAT3,TNFAIP3,TREM1	19
Cell Morphology,Cellular Function and Maintenance	Transmembrane potential of mitochondria	1.09e-05		0.15	APP,CAMP,DNAJB1,HMOX1,HSPA4,HSPB1,HSPD1,IFI6,LGALS1,MT-TE,SOD2	11
Lipid Metabolism,Small Molecule Biochemistry	Metabolism of eicosanoid	1.3e-05		0.16	AKR1C1/AKR1C2,AKR1C3,APOE,APP,CAMP,CD36,HMOX1,HPGD,HRH1,LTA4H,MGST3,STAT3	12
Lipid Metabolism,Small Molecule Biochemistry	Synthesis of eicosanoid	0.000113		0.16	APOE,APP,CAMP,CD36,HMOX1,HPGD,HRH1,LTA4H,MGST3,STAT3	10
Cell-To-Cell Signaling and Interaction,Cellular Movement,Hematological System Development and Function,Immune Cell Trafficking	Recruitment of leukocytes	1.1e-08		0.174	ADGRE5,APOE,APP,CAMP,CD36,CD44,CTSC,HMOX1,HSPA1A/HSPA1B,LGALS1,MMP2,PDE4B,PELI1,S100A8,SOD2,STAT3,THBS1	17
Cell Death and Survival	Necrosis	5.99e-12		0.187	AHSA1,APOC1,APOE,APP,ARF6,ARPC2,ATP1B3,CAMP,CD36,CD44,CSTB,CTSA,DAPK1,DEFB1,DNAJB1,FABP4,FGF18,HMOX1,HSPA1A/HSPA1B,HSPA4,HSPA9,HSPB1,HSPD1,HSPE1,HSPH1,IFI6,IGFBP2,IL2RG,JUND,KLF4,LGALS1,MALAT1,MMP2,MSR1,MT1X,MT2A,NCL,NEDD9,NUPR1,PABPC1,PDE4B,PELI1,PKP2,PLAC8,POR,PTPN1,RBM3,RBP4,RBPJ,RND3,RPS12,RPS27,RPS4Y1,S100A8,SCD,SCGB1A1,SDC2,SERPINB5,SOD2,STAT3,STIP1,THBS1,TNFAIP3,TREM1,UQCRQ,YWHAZ	66
Cell Death and Survival	Apoptosis of breast cancer cell lines	3.32e-05		0.188	CD44,CSTB,HMOX1,HSPB1,HSPD1,KLF4,NEDD9,RPS27,SERPINB5,SOD2,STAT3,THBS1	12
Cell Death and Survival	Apoptosis of myeloid cells	2.48e-06		0.209	APOE,APP,ARF6,CAMP,CD44,LGALS1,MSR1,S100A8,SOD2,STAT3,TREM1	11
Nutritional Disease,Organismal Injury and Abnormalities	Obesity	1.8e-05		0.221	APOE,APP,B3GNT5,CD44,FABP4,HMOX1,HRH1,HSPA1A/HSPA1B,MOGAT1,PDE4B,PLIN2,PTPN1,RBP4,SCD,STAT3,STIP1,THBS1,TNFAIP3	18
Organismal Injury and Abnormalities	Non-malignant disorder	5.02e-10		0.232	ADGRE5,APOC1,APOE,APP,ATP1B1,CD44,CD52,CFD,CSTB,CTSA,CTSC,DAPK1,FABP4,FTL,HMOX1,HSPA1A/HSPA1B,HSPA9,HSPB1,IL2RG,KLF4,LGALS1,MALAT1,MGAT1,MGST1,MMP2,MT1E,MT1G,MT1X,PDE4B,PLAC8,PLD3,POR,RBP4,RGCC,RND3,RPS23,RPS27,S100A8,SCD,SCGB1A1,SDC2,SMIM4,SOD2,STAT3,THBS1,TNFAIP3,YWHAZ	47
Organismal Injury and Abnormalities	Benign lesion	1.22e-07		0.232	ADGRE5,APOC1,APOE,APP,CD44,CFD,CTSC,DAPK1,FABP4,HMOX1,HSPA9,KLF4,LGALS1,MALAT1,MGAT1,MGST1,MMP2,PLD3,POR,RBP4,RND3,S100A8,SCD,SCGB1A1,SMIM4,SOD2,STAT3,THBS1,TNFAIP3,YWHAZ	30
Infectious Diseases,Organismal Injury and Abnormalities	Sepsis	2.65e-06		0.236	APOC1,APOE,CAMP,CD36,CTSC,MMP2,OASL,PDE4B,SERPING1,STAT3,TNFAIP3,TREM1	12
Cellular Movement	Homing of cells	3.13e-06		0.237	APOE,APP,ARPC2,CAMP,CD36,CD44,DEFB1,HRH1,HSPB1,HSPD1,LGALS1,MMP2,NEDD9,PDE4B,PTPN1,S100A8,STAT3,THBS1,TREM1	19
Cell Death and Survival,Organismal Injury and Abnormalities	Apoptosis of epithelial cells	8.37e-06		0.244	APP,ARF6,CAMP,CD36,MMP2,NCL,PTPN1,RND3,SCD,SERPINB5,SOD2,STAT3,TNFAIP3	13
Cellular Development,Cellular Growth and Proliferation,Hematological System Development and Function,Lymphoid Tissue Structure and Development	Cell proliferation of T lymphocytes	3.63e-09		0.245	APOE,ARF6,CAMP,CD36,CD44,CYTIP,FABP4,FTL,HMOX1,HRH1,HSPA1A/HSPA1B,HSPD1,IGFBP2,IL2RG,JUND,KLF4,LGALS1,PELI1,PVR,SCGB1A1,STAT3,THBS1,TNFAIP3,TREM1	24
Lipid Metabolism,Small Molecule Biochemistry	Metabolism of prostaglandin	1.6e-05		0.261	AKR1C1/AKR1C2,AKR1C3,APOE,APP,CAMP,CD36,HMOX1,HPGD,HRH1,STAT3	10
Cell Death and Survival	Cell viability	7.99e-08		0.262	APOE,APP,ARF6,ARPC2,CAMP,CD44,FGF18,HMOX1,HSPA1A/HSPA1B,HSPA4,HSPA9,HSPB1,HSPD1,HSPH1,IGFBP2,IL2RG,KLF4,MALAT1,MGAT1,MGST1,MSR1,NUPR1,PLAC8,PLIN2,POR,PSME4,PTPN1,RBPJ,RSF1,S100A8,SCD,SERPINB5,SOD2,STAT3,STIP1,THBS1,TNFAIP3,UQCRQ,YWHAZ	39
Cell-To-Cell Signaling and Interaction	Response of tumor cell lines	8.76e-05		0.268	AHSA1,APP,ARF6,ARPC2,CD44,HMOX1,HSPA9,MGAT1,PELI1,STAT3	10
Cell Morphology,Cellular Movement	Cell spreading	2.89e-05		0.285	ARF6,CD36,CD44,LGALS1,MSR1,NEDD9,PVR,SDC2,STAT3,THBS1,YWHAZ	11
Hematological System Development and Function,Tissue Morphology	Quantity of blood cells	2.46e-05		0.292	ADGRE5,APOE,APP,B3GNT5,CAMP,CD36,CD44,CYTIP,HMOX1,HRH1,HSPA9,HSPD1,IL2RG,KLF4,LGALS1,NEDD9,PABPC1,PDE4B,PELI1,PLAC8,RBPJ,RGCC,S100A8,STAT3,THBS1,TNFAIP3	26
Cellular Development,Cellular Growth and Proliferation,Hematological System Development and Function,Hematopoiesis,Lymphoid Tissue Structure and Development,Tissue Development	Hematopoiesis of mononuclear leukocytes	0.000138		0.303	APP,CAMP,CD36,CD44,DNAJB1,HLA-DRA,HRH1,HSPA9,HSPD1,IL2RG,KLF4,LGALS1,MSR1,RBPJ,RGCC,STAT3,TNFAIP3,TREM1	18
Lipid Metabolism,Molecular Transport,Small Molecule Biochemistry	Secretion of lipid	9.17e-05		0.333	APOE,CD36,FABP4,HMOX1,LGALS1,PLIN2,SCD,SOD2,STAT3	9
Cancer,Gastrointestinal Disease,Organismal Injury and Abnormalities	Digestive system cancer	2.22e-07		0.336	ADGRE5,AHSA1,AKR1C1/AKR1C2,AKR1C3,ANKDD1A,ANKRD28,APOC1,APOE,APP,ARF6,ARHGAP26,ARMC9,ATP1B1,ATP1B3,B3GNT5,C1QB,C1QC,C2orf68,CAMP,CCDC138,CD163L1,CD36,CD44,CD63,CENPU,CFD,CHCHD10,COLEC12,CRIP1,CSTB,CTSA,CTSC,CTSL,CYTIP,DAPK1,DDX21,DNAJA4,DPYSL2,FABP4,FGD4,FGF18,FTL,HLA-DRA,HLA-DRB5,HMOX1,HPGD,HRH1,HSPA1A/HSPA1B,HSPA4,HSPA9,HSPB1,HSPD1,HSPE1,HSPH1,IFI6,IFITM10,IGFBP2,IL2RG,KIF16B,KLF4,LCOR,LGALS1,L…	125
Hematological System Development and Function,Tissue Morphology	Quantity of leukocytes	1.06e-05		0.358	ADGRE5,APOE,APP,B3GNT5,CAMP,CD36,CD44,CYTIP,HMOX1,HRH1,HSPD1,IL2RG,KLF4,LGALS1,NEDD9,PABPC1,PDE4B,PELI1,PLAC8,RBPJ,RGCC,S100A8,STAT3,THBS1,TNFAIP3	25
Lipid Metabolism,Metabolic Disease,Organismal Injury and Abnormalities,Small Molecule Biochemistry	Disorder of lipid metabolism	7.27e-05		0.403	APOC1,APOE,APP,CD36,CD44,FABP4,HRH1,POR,PTPN1,SCD,SOD2	11
Cardiovascular System Development and Function,Cell-To-Cell Signaling and Interaction	Adhesion of endothelial cells	4.98e-05		0.426	ADGRE5,ARF6,CD36,CD44,CD63,SERPINB5,SERPING1,THBS1	8
Cancer,Gastrointestinal Disease,Organismal Injury and Abnormalities	Large intestine neoplasm	4.61e-05		0.447	ADGRE5,AHSA1,AKR1C1/AKR1C2,AKR1C3,ANKDD1A,ANKRD28,APOC1,APOE,APP,ARF6,ARHGAP26,ARMC9,ATP1B1,ATP1B3,B3GNT5,C1QB,C1QC,CAMP,CCDC138,CD163L1,CD36,CD44,CENPU,CFD,CHCHD10,COLEC12,CRIP1,CSTB,CTSA,CTSC,CTSL,CYTIP,DAPK1,DDX21,DNAJA4,DPYSL2,FABP4,FGD4,FGF18,HLA-DRA,HLA-DRB5,HMOX1,HPGD,HRH1,HSPA4,HSPA9,HSPB1,HSPD1,HSPE1,HSPH1,IFI6,IGFBP2,IL2RG,KIF16B,KLF4,LCOR,LRRFIP1,LST1,LTA4H,MGAT1,MGST3,MMP2,MRPL18,MSR1…	107
Cancer,Organismal Injury and Abnormalities	Visceral metastasis	2.97e-08		0.451	AKR1C1/AKR1C2,AKR1C3,ARF6,CD36,CD44,COLEC12,DPYSL2,HMOX1,HSPA1A/HSPA1B,IGFBP2,LGALS1,MALAT1,MMP2,POR,SCGB1A1,SOD2,STAT3,THBS1	18
Cellular Movement,Hematological System Development and Function,Immune Cell Trafficking	Cell movement of mononuclear leukocytes	3.26e-05		0.453	APOE,APP,CAMP,CD44,CYTIP,DEFB1,DPYSL2,HMOX1,HSPD1,LGALS1,MMP2,NEDD9,PELI1,PVR,STAT3,THBS1	16
Cell Death and Survival	Cell survival	1.13e-08		0.459	APOE,APP,ARF6,ARPC2,CAMP,CD44,FGF18,FTL,HMOX1,HSPA1A/HSPA1B,HSPA4,HSPA9,HSPB1,HSPD1,HSPH1,IGFBP2,IL2RG,JUND,KLF4,MALAT1,MGAT1,MGST1,MSR1,NEDD9,NUPR1,PLAC8,PLIN2,POR,PSME4,PTPN1,RBPJ,RSF1,S100A8,SCD,SERPINB5,SOD2,STAT3,STIP1,THBS1,TNFAIP3,UQCRQ,YWHAZ	42
Gastrointestinal Disease,Hepatic System Disease,Organismal Injury and Abnormalities	Hepatic injury	1.91e-05		0.501	APOE,HLA-DRA,HMOX1,JUND,SCD,SERPING1,STAT3,TNFAIP3	8
Cellular Movement,Hematological System Development and Function,Immune Cell Trafficking	Lymphocyte migration	7.43e-05		0.538	APOE,APP,CAMP,CD44,CYTIP,DEFB1,DPYSL2,HSPD1,LGALS1,PELI1,PVR,STAT3,THBS1	13
Cell Death and Survival	Apoptosis of leukocytes	0.000116		0.581	APOE,APP,CAMP,CD44,IL2RG,KLF4,LGALS1,MSR1,S100A8,SOD2,STAT3,THBS1,TNFAIP3,TREM1	14
Organismal Injury and Abnormalities	Pulmonary fibrosis or aplastic anemia	8.74e-06		0.6	CD36,CD44,CD52,CTSA,HLA-DRA,HSPB1,IL2RG,KLF4,MSR1,RPS27,SCGB1A1,SDC2,STAT3	13
Inflammatory Disease,Organismal Injury and Abnormalities,Respiratory Disease	Fibrosis of lung	2.58e-05		0.6	CD36,CD44,CTSA,HLA-DRA,HSPB1,IL2RG,KLF4,MSR1,SCGB1A1,SDC2,STAT3	11
Cellular Function and Maintenance	Internalization of tumor cell lines	3.72e-05		0.605	AHSA1,ARF6,ARPC2,CD44,HMOX1,MGAT1,NCL,PELI1	8
Cancer,Gastrointestinal Disease,Organismal Injury and Abnormalities	Hepatobiliary neoplasm	0.000129		0.61	AKR1C1/AKR1C2,AKR1C3,APOE,APP,ATP1B1,ATP1B3,CCDC138,CD163L1,CD36,CD44,CENPU,CHCHD10,CTSA,CTSC,CTSL,FGF18,FTL,GPCPD1,HLA-DRB5,HMOX1,HPGD,HSPA1A/HSPA1B,HSPA4,HSPA9,HSPD1,HSPH1,IFITM10,IGFBP2,IL2RG,KIF16B,KLF4,LCOR,LGALS1,LRRFIP1,MGAT1,MMP2,MRPL18,MSR1,MT1E,MT1G,MT1X,MT2A,NCL,NUPR1,OASL,PABPC1,PABPC4,PDE4B,PELI1,PKP2,PLD3,PLIN2,POR,PSME4,PTPN1,PVR,RBP4,RBPJ,RPS27,RPS4Y1,SAMHD1,SCD,SDC2,SERPING1,SMIM…	74
Tissue Morphology	Quantity of cells	5.54e-06		0.634	ADGRE5,APOE,APP,ARF6,ARPC2,B3GNT5,CAMP,CD36,CD44,CD63,CTSA,CYTIP,FGF18,HMOX1,HRH1,HSPA9,HSPB1,HSPD1,IGFBP2,IL2RG,KLF4,LGALS1,MMP2,MSR1,MT2A,NEDD9,NUPR1,PABPC1,PDE4B,PELI1,PLAC8,RBPJ,RGCC,S100A8,SCD,SERPING1,SOD2,STAT3,THBS1,TNFAIP3	40
Infectious Diseases,Organismal Injury and Abnormalities	HIV infection	4.55e-05		0.652	ADGRE5,APP,ARF6,CD36,CD44,DNAJB1,HSPA4,IL2RG,MGAT1,MT1X,MT2A,PDE4B,PELI1,POR,SAMHD1,SNHG32,STIP1,UTY	18
Molecular Transport	Secretion of molecule	5.42e-07		0.655	APOE,APP,ARF6,CAMP,CD36,CD44,CFD,DPYSL2,FABP4,HMOX1,LGALS1,PLIN2,PTPN1,S100A8,SCD,SOD2,STAT3,STXBP2,THBS1,YWHAZ	20
Cancer,Organismal Injury and Abnormalities	Advanced extracranial solid tumor	2.76e-09		0.677	AKR1C1/AKR1C2,AKR1C3,ARF6,CD36,CD44,COLEC12,DPYSL2,FGF18,FTL,HMOX1,HSPA1A/HSPA1B,IL2RG,LGALS1,MALAT1,MMP2,POR,RGCC,RSF1,SCD,SCGB1A1,SERPING1,SOD2,STAT3,THBS1	24
Cancer,Organismal Injury and Abnormalities,Respiratory Disease	Advanced lung cancer	1.5e-05		0.677	ARF6,CD44,FTL,HSPA1A/HSPA1B,LGALS1,MALAT1,MMP2,POR,SCGB1A1,SOD2,STAT3	11
Cancer,Organismal Injury and Abnormalities,Respiratory Disease	Pulmonary metastasis	5.82e-05		0.677	ARF6,HSPA1A/HSPA1B,LGALS1,MALAT1,MMP2,SCGB1A1,SOD2,STAT3	8
Cellular Assembly and Organization,Cellular Compromise	Formation of cellular inclusion bodies	4.86e-06		0.689	APOE,APP,DNAJA4,DNAJB1,FTL,HSPA1A/HSPA1B,HSPA4	7
Cancer,Organismal Injury and Abnormalities	Advanced malignant solid tumor	5.78e-10		0.696	AKR1C1/AKR1C2,AKR1C3,ARF6,CD36,CD44,COLEC12,DPYSL2,FGF18,FTL,HMOX1,HSPA1A/HSPA1B,IGFBP2,IL2RG,KLF4,LGALS1,MALAT1,MMP2,POR,RGCC,RSF1,SCD,SCGB1A1,SERPING1,SOD2,STAT3,THBS1,TNFAIP3,YWHAZ	28
Cancer,Organismal Injury and Abnormalities	Metastatic solid tumor	5.66e-08		0.696	AKR1C1/AKR1C2,AKR1C3,ARF6,CD36,CD44,COLEC12,DPYSL2,FTL,HMOX1,HSPA1A/HSPA1B,IGFBP2,IL2RG,LGALS1,MALAT1,MMP2,POR,SCD,SCGB1A1,SOD2,STAT3,THBS1,TNFAIP3,YWHAZ	23
Cardiovascular Disease,Organismal Injury and Abnormalities	Formation of vascular lesion	5.09e-07		0.7	APOE,APP,CD44,CTSC,HMOX1,KLF4,MMP2,MSR1,STAT3	9
Gene Expression	Transactivation	0.0001		0.715	APOE,APP,CD44,CYTIP,FABP4,HSPA9,IGFBP2,JUND,KLF4,LGALS1,PTPN1,RBPJ,SAMHD1,STAT3,UTY	15
Cell Death and Survival	Apoptosis of phagocytes	1.02e-05		0.732	APOE,APP,CAMP,CD44,MSR1,S100A8,SOD2,STAT3,TNFAIP3,TREM1	10
Cell Death and Survival	Apoptosis of blood cells	2.23e-05		0.763	APOE,APP,ARF6,CAMP,CD44,HSPA9,IL2RG,KLF4,LGALS1,MSR1,S100A8,SOD2,STAT3,THBS1,TNFAIP3,TREM1	16
Gastrointestinal Disease,Hepatic System Disease,Organismal Injury and Abnormalities	Liver Damage	7.6e-08		0.839	APOE,APP,CD44,HLA-DRA,HMOX1,IL2RG,JUND,POR,PTPN1,SCD,SERPING1,STAT3,TNFAIP3	13
Cell Death and Survival	Apoptosis of tumor cell lines	5.39e-10		0.845	AHSA1,APOE,APP,ATP1B3,CAMP,CD44,CSTB,DAPK1,DEFB1,DNAJB1,HMOX1,HSPA1A/HSPA1B,HSPA4,HSPA9,HSPB1,HSPD1,IFI6,JUND,KLF4,LGALS1,MALAT1,MSR1,MT2A,NCL,NEDD9,NUPR1,PDE4B,PTPN1,RBM3,RPS27,S100A8,SCD,SDC2,SERPINB5,SOD2,STAT3,THBS1,TNFAIP3,TREM1,YWHAZ	40
Organismal Injury and Abnormalities	Blood clot	5.92e-06		0.845	APOE,APP,ARF6,CFD,HMOX1,LGALS1,MMP2,PDE4B,PTPN1,STXBP2,THBS1	11
Hematological System Development and Function,Lymphoid Tissue Structure and Development,Tissue Morphology	Quantity of T lymphocytes	2.58e-05		0.928	APOE,APP,CAMP,CD44,HRH1,HSPD1,IL2RG,KLF4,LGALS1,PABPC1,PELI1,RBPJ,RGCC,S100A8,STAT3,THBS1,TNFAIP3	17
Infectious Diseases,Organismal Injury and Abnormalities	Replication of virus	7.29e-05		0.931	ATP1B1,ATP1B3,HMOX1,HPGD,HSPD1,IFI6,MGAT1,MSR1,NCL,OASL,PTPN1,S100A8,SAMHD1,SCD,STAT3,STXBP2	16
Cell Cycle	Entry into S phase	1.15e-05		0.956	APP,CSTB,HMOX1,HSPB1,KLF4,RGCC,SOD2,STAT3	8
Cellular Movement,Hematological System Development and Function,Immune Cell Trafficking	Cell movement of lymphocytes	1.77e-05		0.964	APOE,APP,CAMP,CD44,CYTIP,DEFB1,DPYSL2,HMOX1,HSPD1,LGALS1,NEDD9,PELI1,PVR,STAT3,THBS1	15
Gene Expression	Expression of RNA	8.23e-06		0.972	APOE,APP,ATP1B1,CD36,CD44,DAPK1,DDX21,DNAJA4,DNAJB1,FABP4,HSPA1A/HSPA1B,HSPA4,HSPB1,HSPH1,IL2RG,JUND,KLF4,LCOR,LGALS1,LRRFIP1,MSR1,MT-TE,MT-TP,MT-TQ,MT-TV,NCL,PABPC4,PLAC8,RBM3,RBPJ,RGCC,RPL30,RPL41,RPS23,RPS4Y1,RSF1,SCGB1A1,SOD2,STAT3,TNFAIP3,YWHAZ,ZNF589	42
Cardiovascular Disease,Organismal Injury and Abnormalities	Atherogenesis	5.37e-05		0.988	APOE,APP,CD44,HMOX1,MMP2,MSR1	6
Inflammatory Response	Acute inflammation of tissue	0.000126		1	APOE,CD44,LTA4H,STIP1	4
Cell Death and Survival	Cell death of blood cells	1.16e-06		1.029	APOE,APP,ARF6,CAMP,CD44,DAPK1,FABP4,HMOX1,HSPA9,IL2RG,KLF4,LGALS1,MSR1,PELI1,RBPJ,S100A8,SOD2,STAT3,THBS1,TNFAIP3,TREM1,YWHAZ	22
Cell Death and Survival	Cell death of immune cells	6.16e-06		1.029	APOE,APP,CAMP,CD44,DAPK1,FABP4,HMOX1,IL2RG,KLF4,LGALS1,MSR1,PELI1,RBPJ,S100A8,SOD2,STAT3,THBS1,TNFAIP3,TREM1,YWHAZ	20
Cell Death and Survival	Cell death of breast cancer cell lines	6.37e-08		1.036	CAMP,CD44,CSTB,HMOX1,HSPA1A/HSPA1B,HSPB1,HSPD1,HSPH1,IGFBP2,KLF4,NEDD9,RPS27,SERPINB5,SOD2,STAT3,STIP1,THBS1	17
Cell Death and Survival	Cell death of tumor cell lines	9.29e-11		1.053	AHSA1,APOE,APP,ATP1B3,CAMP,CD44,CSTB,DAPK1,DEFB1,DNAJB1,HMOX1,HSPA1A/HSPA1B,HSPA4,HSPA9,HSPB1,HSPD1,HSPH1,IFI6,IGFBP2,JUND,KLF4,LGALS1,MALAT1,MSR1,MT1X,MT2A,NCL,NEDD9,NUPR1,PDE4B,PELI1,POR,PTPN1,RBM3,RPS27,RPS4Y1,S100A8,SCD,SDC2,SERPINB5,SOD2,STAT3,STIP1,THBS1,TNFAIP3,TREM1,YWHAZ	47
Lipid Metabolism,Molecular Transport,Small Molecule Biochemistry	Concentration of lipid	5.97e-06		1.057	APOC1,APOE,APP,ARF6,B3GNT5,CAMP,CD36,CFD,FABP4,HMOX1,HPGD,HRH1,IGFBP2,LTA4H,MOGAT1,MSR1,PLIN2,POR,PTPN1,RBP4,RGCC,S100A8,SCD,SOD2,STAT3	25
Hematological System Development and Function,Lymphoid Tissue Structure and Development,Tissue Morphology	Quantity of lymphocytes	1.17e-05		1.091	APOE,APP,B3GNT5,CAMP,CD36,CD44,CYTIP,HRH1,HSPD1,IL2RG,KLF4,LGALS1,NEDD9,PABPC1,PELI1,RBPJ,RGCC,S100A8,STAT3,THBS1,TNFAIP3	21
Carbohydrate Metabolism	Depletion of carbohydrate	5.05e-05		1.131	ARF6,CD36,FGF18,SCD	4
Cell-To-Cell Signaling and Interaction	Binding of tumor cell lines	1.69e-05		1.186	APOE,APP,CAMP,CD36,CD44,CYTIP,MGAT1,MMP2,NCL,PVR,SDC2,SERPINB5,SERPING1,STAT3,THBS1	15
Cell Death and Survival	Apoptosis of leukemia cell lines	1.48e-05		1.253	CAMP,CD44,HMOX1,HSPA1A/HSPA1B,HSPB1,KLF4,LGALS1,MSR1,S100A8,SOD2,STAT3,TNFAIP3	12
Lymphoid Tissue Structure and Development,Tissue Morphology	Quantity of lymphatic system cells	1.09e-05		1.265	APOE,APP,B3GNT5,CAMP,CD36,CD44,CYTIP,HRH1,HSPD1,IL2RG,KLF4,LGALS1,NEDD9,PABPC1,PELI1,RBPJ,RGCC,S100A8,SOD2,STAT3,THBS1,TNFAIP3	22
Infectious Diseases,Organismal Injury and Abnormalities	Replication of RNA virus	6.94e-05		1.291	ATP1B1,ATP1B3,HMOX1,HPGD,HSPD1,IFI6,MGAT1,MSR1,NCL,OASL,PTPN1,S100A8,SCD,STAT3,STXBP2	15
Cell Death and Survival	Cell death of leukemia cell lines	2.19e-05		1.333	CAMP,CD44,HMOX1,HSPA1A/HSPA1B,HSPB1,KLF4,LGALS1,MSR1,S100A8,SOD2,STAT3,THBS1,TNFAIP3	13
Cell Morphology,Cellular Assembly and Organization,Cellular Function and Maintenance	Formation of invadopodia	1.37e-06		1.342	ARF6,ARPC2,CD44,CSTB,NEDD9,SERPINB5	6
Inflammatory Response	Acute inflammation	2.25e-05		1.342	APOE,CD44,LGALS1,LTA4H,STIP1	5
Post-Translational Modification,Protein Degradation	Oxidation of protein	1.16e-07		1.347	APOE,APP,DNAJB1,FTL,HMOX1,HSPA4	6
Neurological Disease,Organismal Injury and Abnormalities	Movement Disorders	1.84e-05		1.409	APOE,APP,ATP1B1,CD44,CSTB,CTSA,DNAJB1,FTL,HLA-DRA,HLA-DRB5,HMOX1,HRH1,HSPA1A/HSPA1B,HSPB1,MT-ND3,MT-TE,MT-TP,MT-TV,MT1E,MT1G,MT1X,MT2A,PDE4B,PLD3,RBP4,SCD,SOD2,UQCRQ,YWHAZ	29
Cardiovascular Disease,Organismal Injury and Abnormalities	Infarction	7.31e-05		1.432	APOE,APP,CD36,CD44,HMOX1,HRH1,HSPB1,HSPH1,MALAT1,MMP2,SERPING1,STIP1,TNFAIP3	13
Cancer,Organismal Injury and Abnormalities,Reproductive System Disease	Development of mammary tumor	0.000138		1.432	HSPA9,MALAT1,MSR1,NEDD9,PTPN1,STAT3,THBS1	7
Cell-To-Cell Signaling and Interaction,Hematological System Development and Function,Immune Cell Trafficking	Adhesion of immune cells	8.24e-06		1.505	ADGRE5,APOE,APP,ARF6,CAMP,CD36,CD44,LGALS1,MSR1,NEDD9,S100A8,SERPING1,STXBP2,THBS1	14
Cellular Function and Maintenance	Cellular homeostasis	2.08e-07		1.531	APOE,APP,ARF6,ATP1B1,ATP1B3,CAMP,CD36,CD52,CSTB,CTSL,DAPK1,DEFB1,DNAJB1,FABP4,FTL,HLA-DRA,HMOX1,HRH1,HSPA4,HSPB1,HSPD1,IFI6,IL2RG,KLF4,LGALS1,MGAT1,MSR1,MT-TE,MT2A,NEDD9,NUPR1,PDE4B,PLAC8,RBP4,RBPJ,RGCC,S100A8,SCD,SOD2,STAT3,TNFAIP3	41
Cellular Movement,Skeletal and Muscular System Development and Function	Cell movement of smooth muscle cells	0.00012		1.692	APOE,CD44,HMOX1,IGFBP2,MMP2,PTPN1,STAT3,THBS1	8
Gastrointestinal Disease,Hepatic System Disease,Organismal Injury and Abnormalities	Fibrosis of liver	0.000123		1.709	APOE,ATP1B1,HLA-DRA,HMOX1,HRH1,HSPB1,IL2RG,LGALS1,MMP2,SCD,STAT3	11
Tissue Development	Accumulation of cells	1.64e-05		1.723	ADGRE5,APOE,CD44,CTSC,HMOX1,IL2RG,PTPN1,RBPJ,S100A8,SAMHD1,SERPING1,STAT3,THBS1	13
Cellular Assembly and Organization,Tissue Development	Formation of filaments	1.43e-05		1.775	APOE,APP,ARF6,ARPC2,CD44,CTSL,DPYSL2,HSPB1,MMP2,PKP2,RGCC,RND3,SDC2,STAT3,THBS1	15
Cell-To-Cell Signaling and Interaction,Cellular Assembly and Organization	Cell-cell contact	3.08e-05	Increased	2.072	ADGRE5,APOE,APP,ARF6,ARHGAP26,CD36,CD44,HSPA4,LGALS1,MGAT1,MMP2,OOEP,PKP2,PVR,RBM3,RND3,SDC2,STIP1,STXBP2,THBS1,YWHAZ	21
Hematological System Development and Function,Immune Cell Trafficking,Inflammatory Response,Tissue Development	Accumulation of leukocytes	6.31e-06	Increased	2.157	ADGRE5,APOE,CD44,CTSC,HMOX1,IL2RG,PTPN1,RBPJ,S100A8,SERPING1,STAT3,THBS1	12
Hematological System Development and Function,Tissue Development	Accumulation of myeloid cells	2.91e-05	Increased	2.224	ADGRE5,APOE,CD44,CTSC,HMOX1,S100A8,SERPING1,STAT3,THBS1	9
Dermatological Diseases and Conditions,Organismal Injury and Abnormalities	Psoriasis	3.59e-13			ADGRE5,APOC1,APOE,ATP1B1,CAMP,CD36,CD63,CFD,CRIP1,CSTB,CTSL,HMOX1,HSPE1,HSPH1,IFI6,JUND,LGALS1,MMP2,MT1X,OASL,PDE4B,POR,RBP4,S100A8,SERPINB5,SOD2,TNFAIP3	27
Connective Tissue Disorders,Immunological Disease,Inflammatory Disease,Organismal Injury and Abnormalities,Skeletal and Muscular Disorders	Lupus erythematosus	6.68e-12			APOE,C1QB,CAMP,CD44,CRIP1,CTSA,CTSL,DAPK1,HLA-DRA,HRH1,HSPE1,IFI6,MT1X,MT2A,OASL,PTPN1,RPS4Y1,S100A8,SAMHD1,SERPING1,SOD2,STAT3,TNFAIP3	23
Dermatological Diseases and Conditions,Organismal Injury and Abnormalities	Chronic skin disorder	1.77e-11			APOE,ATP1B1,CAMP,CRIP1,CSTB,CTSL,HMOX1,HRH1,HSPE1,HSPH1,IL2RG,MT1X,PDE4B,POR,S100A8,SERPINB5,SOD2	17
Neurological Disease,Organismal Injury and Abnormalities,Psychological Disorders	Dementia	6.93e-11			APOC1,APOE,APP,ATP1B1,CD36,CFD,CHCHD10,DPYSL2,HMOX1,HRH1,HSPA1A/HSPA1B,HSPA9,HSPD1,IGFBP2,LGALS1,MMP2,MT-TE,MT-TP,MT-TQ,MT-TV,OOEP,PDE4B,PLD3,SCD,SOD2,STAT3,STIP1,YWHAZ	28
Connective Tissue Disorders,Immunological Disease,Inflammatory Disease,Inflammatory Response,Organismal Injury and Abnormalities,Skeletal and Muscular Disorders	Rheumatoid arthritis	9.21e-11			ADGRE5,APOE,ATP1B1,CD36,CD44,CFD,CTSC,DNAJA4,FABP4,HLA-DRA,HLA-DRB5,HMOX1,HSPA1A/HSPA1B,HSPD1,LGALS1,LST1,MMP2,PDE4B,PTPN1,RBP4,RGCC,S100A8,SDC2,SERPINB5,STAT3,THBS1,TNFAIP3,ZNF331	28
Endocrine System Disorders,Gastrointestinal Disease,Metabolic Disease,Organismal Injury and Abnormalities	Diabetes mellitus	1.2e-10			AKR1C3,APOC1,APOE,ATP1B1,ATP1B3,CCDC138,CD36,CD44,CD52,CFD,CRIP1,CTSC,CTSL,FABP4,HLA-DRA,HLA-DRB5,HPGD,HRH1,HSPA1A/HSPA1B,HSPB1,IGFBP2,KLF4,LST1,MGST1,MMP2,MSR1,MT-TE,MT1G,MT2A,PDE4B,POR,PTPN1,RBP4,RBPJ,RPL41,SCD,SERPING1,SNHG32,SOD2,STAT3,TTTY14,UTY	42
Gene Expression,Protein Synthesis	Translation of mRNA	6.67e-10			APP,DAPK1,HSPB1,MT-TE,MT-TP,MT-TQ,MT-TV,PABPC4,RBM3,RPL30,RPL41,RPS23,RPS4Y1	13
Cardiovascular Disease,Organismal Injury and Abnormalities	Peripheral arterial disease	9.16e-10			ADGRE5,APOE,CD36,CTSA,CTSC,CYTIP,DNAJB1,HSPA1A/HSPA1B,HSPA4,HSPH1,KLF4,MSR1,NEDD9,THBS1,TREM1	15
Neurological Disease,Organismal Injury and Abnormalities,Psychological Disorders	Alzheimer disease or frontotemporal dementia	4.08e-09			APOC1,APOE,APP,ATP1B1,CD36,CFD,CHCHD10,DPYSL2,HMOX1,HRH1,HSPA1A/HSPA1B,HSPA9,HSPD1,IGFBP2,LGALS1,MMP2,OOEP,PDE4B,PLD3,SCD,SOD2,STAT3,STIP1,YWHAZ	24
Gene Expression	Expression of mRNA	7.04e-09			APP,DAPK1,HSPB1,MT-TE,MT-TP,MT-TQ,MT-TV,PABPC4,RBM3,RPL30,RPL41,RPS23,RPS4Y1,RSF1	14
Neurological Disease,Organismal Injury and Abnormalities,Psychological Disorders	Tauopathy	9.53e-09			APOC1,APOE,APP,ATP1B1,CD36,CD63,CFD,DPYSL2,HMOX1,HRH1,HSPA1A/HSPA1B,HSPA9,HSPD1,IGFBP2,LGALS1,MMP2,OOEP,PDE4B,PLD3,SCD,SOD2,STAT3,STIP1,YWHAZ	24
Immunological Disease,Organismal Injury and Abnormalities	Allergy	9.81e-09			CAMP,CD44,CD63,CTSL,CYTIP,DEFB1,DPYSL2,FABP4,HLA-DRA,HLA-DRB5,HRH1,IFI6,IL2RG,LGALS1,PDE4B,PELI1,S100A8,TNFAIP3,ZNF331	19
Metabolic Disease,Neurological Disease,Organismal Injury and Abnormalities,Psychological Disorders	Alzheimer disease	1.41e-08			APOC1,APOE,APP,ATP1B1,CD36,CFD,DPYSL2,HMOX1,HRH1,HSPA1A/HSPA1B,HSPA9,HSPD1,IGFBP2,LGALS1,MMP2,OOEP,PDE4B,PLD3,SCD,SOD2,STAT3,STIP1,YWHAZ	23
Dermatological Diseases and Conditions,Immunological Disease,Inflammatory Disease,Inflammatory Response,Organismal Injury and Abnormalities	Atopic dermatitis	1.87e-08			CAMP,CD44,CTSL,DEFB1,DPYSL2,FABP4,HLA-DRA,HLA-DRB5,HRH1,LGALS1,PDE4B,S100A8,TNFAIP3,ZNF331	14
Endocrine System Disorders,Gastrointestinal Disease,Metabolic Disease,Organismal Injury and Abnormalities,Renal and Urological Disease	Diabetic nephropathy	2.44e-08			AKR1C3,APOE,ATP1B1,ATP1B3,CCDC138,CD36,CRIP1,CTSL,HPGD,IGFBP2,MGST1,MSR1,MT1G,MT2A,PDE4B,SCD,TTTY14,UTY	18
Immunological Disease,Organismal Injury and Abnormalities	Immediate hypersensitivity	2.54e-08			CAMP,CD44,CD63,CTSL,DEFB1,DPYSL2,FABP4,HLA-DRA,HLA-DRB5,HRH1,IL2RG,LGALS1,PDE4B,S100A8,TNFAIP3,ZNF331	16
Dermatological Diseases and Conditions,Organismal Injury and Abnormalities	Chronic psoriasis	2.67e-08			APOE,ATP1B1,CRIP1,CSTB,CTSL,HMOX1,HSPE1,HSPH1,POR,SOD2	10
Cancer,Hematological Disease,Immunological Disease,Organismal Injury and Abnormalities	Lymphoma	3.11e-08			APP,ARMC9,CD36,CD44,CD52,CD63,CTSL,CYTIP,DAPK1,FABP4,HLA-DRA,HMOX1,HSPH1,IFI6,IL2RG,JUND,KLF4,LGALS1,LRRFIP1,MMP2,OASL,PKP2,PLAC8,POR,PSME4,PTPN1,RBPJ,RGCC,RND3,SAMHD1,SERPINB5,SOD2,STAT3,STIP1,THBS1,TNFAIP3,TRHDE,YWHAZ,ZNF331	39
Connective Tissue Disorders,Immunological Disease,Inflammatory Disease,Organismal Injury and Abnormalities,Skeletal and Muscular Disorders	Systemic lupus erythematosus	4.14e-08			APOE,CAMP,CD44,CRIP1,CTSA,DAPK1,HLA-DRA,HRH1,IFI6,MT1X,MT2A,OASL,PTPN1,RPS4Y1,SERPING1,SOD2,STAT3,TNFAIP3	18
Cell Morphology,Cell-To-Cell Signaling and Interaction,Cellular Assembly and Organization	Loss of intercellular junctions	4.17e-08			APP,ARF6,HSPA4,RBM3,STIP1,THBS1	6
Immunological Disease,Inflammatory Disease,Organismal Injury and Abnormalities	Atopic disease	4.33e-08			CAMP,CD44,CTSL,DEFB1,DPYSL2,FABP4,HLA-DRA,HLA-DRB5,HRH1,IL2RG,LGALS1,PDE4B,S100A8,TNFAIP3,ZNF331	15
Hereditary Disorder,Organismal Injury and Abnormalities,Psychological Disorders	Familial psychiatric disease	4.65e-08			APOC1,APOE,APP,ATP1B1,CD44,CHCHD10,CSTB,DNAJB1,FTL,HLA-DRB5,HMOX1,HRH1,HSPA1A/HSPA1B,HSPD1,MT-ND3,MT-TE,MT-TP,MT-TQ,MT-TV,MT1E,MT1G,MT1X,MT2A,RBP4,SAMHD1,SCD,SOD2,TANC2,UQCRQ,YWHAZ	30
Cancer,Hematological Disease,Immunological Disease,Organismal Injury and Abnormalities	Lymphocytic cancer	4.7e-08			APOE,APP,ARHGAP26,ARMC9,ATP1B1,C1QC,CCDC138,CD163L1,CD36,CD44,CD52,CD63,CTSC,CTSL,CYTIP,DAPK1,FABP4,HLA-DRA,HMOX1,HSPB1,HSPH1,IFI6,IL2RG,JUND,KIF16B,KLF4,LGALS1,LRRFIP1,MALAT1,MMP2,MT-ND3,OASL,PDE4B,PELI1,PKP2,PLAC8,POR,PSME4,PTPN1,RBPJ,RGCC,RND3,SAMHD1,SERPINB5,SOD2,STAT3,STIP1,THBS1,TNFAIP3,TRHDE,UTY,WDR74,YWHAZ,ZNF331	54
Cancer,Hematological Disease,Organismal Injury and Abnormalities	Malignant lymphocytic neoplasm	4.7e-08			APOE,APP,ARHGAP26,ARMC9,ATP1B1,C1QC,CCDC138,CD163L1,CD36,CD44,CD52,CD63,CTSC,CTSL,CYTIP,DAPK1,FABP4,HLA-DRA,HMOX1,HSPB1,HSPH1,IFI6,IL2RG,JUND,KIF16B,KLF4,LGALS1,LRRFIP1,MALAT1,MMP2,MT-ND3,OASL,PDE4B,PELI1,PKP2,PLAC8,POR,PSME4,PTPN1,RBPJ,RGCC,RND3,SAMHD1,SERPINB5,SOD2,STAT3,STIP1,THBS1,TNFAIP3,TRHDE,UTY,WDR74,YWHAZ,ZNF331	54
Cancer,Hematological Disease,Immunological Disease,Organismal Injury and Abnormalities	Plasma cell neoplasm	4.83e-08			APOE,APP,ATP1B1,CD36,CD44,CD52,CTSC,CTSL,HMOX1,IL2RG,MALAT1,MMP2,PKP2,POR,PTPN1,SAMHD1,SERPINB5,SOD2,STAT3,STIP1,TNFAIP3,YWHAZ	22
Cardiovascular Disease,Organismal Injury and Abnormalities	Advanced stage peripheral arterial disease	4.83e-08			ADGRE5,APOE,CD36,DNAJB1,HSPA1A/HSPA1B,HSPA4,HSPH1,MSR1,NEDD9,THBS1	10
Organismal Injury and Abnormalities,Tissue Morphology	Morphology of lesion	6.34e-08			APOE,APP,CAMP,CD44,CSTB,FABP4,HMOX1,HSPA1A/HSPA1B,HSPH1,IGFBP2,LGALS1,MALAT1,MMP2,MSR1,SERPING1,STAT3,STIP1,THBS1,TNFAIP3	19
Endocrine System Disorders,Gastrointestinal Disease,Metabolic Disease,Organismal Injury and Abnormalities	Diabetic complication	7.35e-08			AKR1C3,APOE,ATP1B1,ATP1B3,CCDC138,CD36,CRIP1,CTSL,HPGD,IGFBP2,MGST1,MSR1,MT1G,MT2A,PDE4B,SCD,SOD2,TTTY14,UTY	19
Cancer,Hematological Disease,Immunological Disease,Organismal Injury and Abnormalities	Neoplasia of leukocytes	8.19e-08			APOE,APP,ARHGAP26,ARMC9,ATP1B1,C1QC,CCDC138,CD36,CD44,CD52,CD63,CTSC,CTSL,CYTIP,DAPK1,FABP4,HLA-DRA,HMOX1,HSPB1,HSPH1,IFI6,IL2RG,JUND,KIF16B,KLF4,LGALS1,LRRFIP1,MALAT1,MMP2,MT-ND3,OASL,PDE4B,PKP2,PLAC8,POR,PSME4,PTPN1,RBPJ,RGCC,RND3,SAMHD1,SERPINB5,SOD2,STAT3,STIP1,THBS1,TNFAIP3,TRHDE,WDR74,YWHAZ,ZNF331	51
Organismal Injury and Abnormalities,Tissue Morphology	Size of lesion	8.58e-08			APOE,APP,CAMP,CD44,CSTB,FABP4,HMOX1,HSPA1A/HSPA1B,HSPH1,LGALS1,MALAT1,MMP2,MSR1,SERPING1,STAT3,STIP1,THBS1,TNFAIP3	18
Neurological Disease,Organismal Injury and Abnormalities	Progressive encephalopathy	8.88e-08			APOC1,APOE,APP,ATP1B1,CD36,CFD,CHCHD10,CSTB,DPYSL2,FTL,HLA-DRA,HMOX1,HRH1,HSPA1A/HSPA1B,HSPA9,HSPB1,HSPD1,IGFBP2,LGALS1,MMP2,MT-TP,OOEP,PDE4B,PLD3,SCD,SOD2,STAT3,STIP1,YWHAZ	29
Cancer,Hematological Disease,Organismal Injury and Abnormalities	Hematologic cancer of cells	1.45e-07			APP,ARHGAP26,ARMC9,ATP1B1,C1QC,CCDC138,CD36,CD44,CD52,CD63,CTSL,CYTIP,DAPK1,FABP4,HLA-DRA,HMOX1,HSPB1,HSPH1,IFI6,IL2RG,JUND,KIF16B,KLF4,LGALS1,LRRFIP1,MMP2,MT-ND3,OASL,PDE4B,PKP2,PLAC8,POR,PSME4,PTPN1,RBPJ,RGCC,RND3,SAMHD1,SERPINB5,SOD2,STAT3,STIP1,THBS1,TNFAIP3,TRHDE,WDR74,YWHAZ,ZNF331	48
Organismal Injury and Abnormalities,Reproductive System Disease	Endometriosis	1.78e-07			APOE,ATP1B1,CD44,HSPA1A/HSPA1B,HSPB1,IL2RG,MGST1,MMP2,MT1E,MT1G,MT1X,RBP4,RGCC,RPS23,S100A8,SDC2	16
Cancer,Hematological Disease,Immunological Disease,Organismal Injury and Abnormalities	Tumorigenesis of lymphocytes	3.33e-07			APOE,APP,ARMC9,ATP1B1,C1QC,CD36,CD44,CD52,CD63,CTSC,CTSL,CYTIP,DAPK1,FABP4,HLA-DRA,HMOX1,HSPB1,HSPH1,IFI6,IL2RG,JUND,KIF16B,KLF4,LGALS1,LRRFIP1,MALAT1,MMP2,MT-ND3,OASL,PKP2,PLAC8,POR,PSME4,PTPN1,RBPJ,RGCC,RND3,SAMHD1,SERPINB5,SOD2,STAT3,STIP1,THBS1,TNFAIP3,TRHDE,WDR74,YWHAZ,ZNF331	48
Hereditary Disorder,Neurological Disease,Organismal Injury and Abnormalities,Psychological Disorders	Familial dementia	3.37e-07			APOC1,APOE,APP,CHCHD10,MT-TE,MT-TP,MT-TQ,MT-TV	8
Cancer,Hematological Disease,Immunological Disease,Organismal Injury and Abnormalities	Non-Hodgkin lymphoma	3.97e-07			APP,ARMC9,CD36,CD44,CD52,CD63,CTSL,CYTIP,DAPK1,HLA-DRA,HMOX1,HSPH1,IFI6,IL2RG,JUND,LRRFIP1,MMP2,OASL,PKP2,POR,PSME4,PTPN1,RBPJ,RGCC,RND3,SAMHD1,SERPINB5,STAT3,STIP1,TNFAIP3,TRHDE,YWHAZ,ZNF331	33
Connective Tissue Disorders,Immunological Disease,Inflammatory Disease,Inflammatory Response,Organismal Injury and Abnormalities,Skeletal and Muscular Disorders	Juvenile rheumatoid arthritis	4.07e-07			APOE,ATP1B1,DNAJA4,HLA-DRA,HSPA1A/HSPA1B,LGALS1,MMP2,PDE4B,S100A8,THBS1,TNFAIP3	11
Cancer,Hematological Disease,Organismal Injury and Abnormalities	Mature lymphocytic neoplasm	5.49e-07			APOE,APP,ARMC9,ATP1B1,CD36,CD44,CD52,CD63,CTSC,CTSL,CYTIP,DAPK1,HLA-DRA,HMOX1,HSPH1,IFI6,IL2RG,JUND,LRRFIP1,MALAT1,MMP2,OASL,PKP2,POR,PSME4,PTPN1,RBPJ,RGCC,RND3,SAMHD1,SERPINB5,SOD2,STAT3,STIP1,TNFAIP3,TRHDE,WDR74,YWHAZ,ZNF331	39
Cardiovascular Disease,Organismal Injury and Abnormalities	Fatty lesion	7.26e-07			APOE,APP,CTSC,CTSL,FTL,MMP2,STAT3	7
Metabolic Disease,Organismal Injury and Abnormalities	Amyloidosis of vasculature	7.73e-07			APOE,APP,SOD2	3
Cancer,Hematological Disease,Immunological Disease,Organismal Injury and Abnormalities	Plasma cell dyscrasia	9.46e-07			APOE,APP,ATP1B1,CD36,CD44,CD52,CTSL,HMOX1,MMP2,PKP2,POR,PTPN1,SAMHD1,SERPINB5,SOD2,STAT3,STIP1,TNFAIP3,YWHAZ	19
Connective Tissue Disorders,Inflammatory Disease,Inflammatory Response,Organismal Injury and Abnormalities,Skeletal and Muscular Disorders	Polyarthritis	1.01e-06			ADGRE5,APOE,CD44,HLA-DRA,HSPA1A/HSPA1B,LGALS1,S100A8,STAT3,THBS1,TNFAIP3	10
Cancer,Hematological Disease,Immunological Disease,Organismal Injury and Abnormalities	Mature B cell malignant tumor	1.31e-06			APOE,APP,ARMC9,ATP1B1,CD36,CD44,CD52,CD63,CTSC,CTSL,HMOX1,HSPH1,IL2RG,LRRFIP1,MALAT1,MMP2,PKP2,POR,PSME4,PTPN1,RND3,SAMHD1,SERPINB5,SOD2,STAT3,STIP1,TNFAIP3,TRHDE,YWHAZ	29
Cancer,Gastrointestinal Disease,Hepatic System Disease,Organismal Injury and Abnormalities	Hepatocellular carcinoma	1.81e-06			AKR1C1/AKR1C2,ATP1B1,ATP1B3,CCDC138,CD163L1,CD44,CENPU,FTL,HSPA1A/HSPA1B,HSPA4,HSPA9,HSPD1,IL2RG,KLF4,LGALS1,MMP2,MT1E,MT1G,MT1X,MT2A,NCL,NUPR1,PDE4B,POR,PVR,RBP4,RBPJ,SCD,SERPING1,SMIM4,STAT3,TRHDE	32
Cellular Function and Maintenance	Uptake of cells	2.21e-06			APOE,APP,CD36,MSR1,NCL,TNFAIP3	6
Neurological Disease,Organismal Injury and Abnormalities,Psychological Disorders	Disorder of basal ganglia	2.26e-06			APOE,APP,ATP1B1,CD44,DNAJB1,FTL,HLA-DRA,HLA-DRB5,HMOX1,HRH1,HSPA1A/HSPA1B,HSPB1,MT-ND3,MT-TP,MT1E,MT1G,MT1X,MT2A,PDE4B,RBP4,SAMHD1,SCD,SOD2,UQCRQ,YWHAZ	25
Dermatological Diseases and Conditions,Immunological Disease,Inflammatory Disease,Organismal Injury and Abnormalities	Lichen planus	2.81e-06			APOE,CD44,CD52,CFD,HLA-DRA,IFI6,S100A8	7
Endocrine System Disorders,Metabolic Disease,Organismal Injury and Abnormalities	Metabolic syndrome X	3.41e-06			APOE,CFD,FABP4,HRH1,RBP4,RPL41,S100A8,SCD,THBS1	9
Neurological Disease,Organismal Injury and Abnormalities,Skeletal and Muscular Disorders	Neuromuscular disease	3.7e-06			APOE,APP,ATP1B1,CD44,CD52,DNAJB1,FTL,HLA-DRA,HLA-DRB5,HMOX1,HRH1,HSPA1A/HSPA1B,HSPB1,MT-ND3,MT-TE,MT-TP,MT-TQ,MT-TV,MT1E,MT1G,MT1X,MT2A,PDE4B,RBP4,SCD,SERPING1,UQCRQ,YWHAZ	28
Cancer,Hematological Disease,Immunological Disease,Organismal Injury and Abnormalities	Low-grade lymphoma	3.75e-06			APP,ARMC9,CD44,CD52,CTSL,HMOX1,IL2RG,LRRFIP1,MMP2,PKP2,POR,PSME4,PTPN1,RND3,SERPINB5,STAT3,STIP1,TNFAIP3,TRHDE	19
Connective Tissue Disorders,Immunological Disease,Inflammatory Disease,Inflammatory Response,Organismal Injury and Abnormalities,Skeletal and Muscular Disorders	Polyarticular juvenile rheumatoid arthritis	4.07e-06			APOE,HLA-DRA,HSPA1A/HSPA1B,LGALS1,S100A8,THBS1,TNFAIP3	7
Cardiovascular Disease,Organismal Injury and Abnormalities,Tissue Morphology	Size of infarct	4.27e-06			APOE,APP,CD44,HMOX1,HSPH1,MALAT1,MMP2,SERPING1,STIP1,TNFAIP3	10
Infectious Diseases,Organismal Injury and Abnormalities	Attachment of virus	5e-06			APOE,APP,FTL,LGALS1	4
Developmental Disorder,Hereditary Disorder,Immunological Disease,Organismal Injury and Abnormalities	Complement component deficiency	6.15e-06			C1QB,C1QC,CFD,SERPING1	4
Infectious Diseases,Organismal Injury and Abnormalities	Severe COVID-19	6.29e-06			HLA-DRA,HLA-DRB5,IFI6,LGALS1,PABPC1,PLAC8,POR,RBP4,S100A8	9
Hereditary Disorder,Organismal Injury and Abnormalities,Skeletal and Muscular Disorders	Hereditary myopathy	6.67e-06			APP,C1QB,CFD,CHCHD10,COLEC12,FGD4,HLA-DRA,HSPB1,HSPD1,MGST1,MT-ND3,MT-TE,MT-TP,MT-TQ,MT-TV,PKP2,RBP4,SAMHD1,SDC2,UQCRQ	20
Cancer,Hematological Disease,Immunological Disease,Organismal Injury and Abnormalities	Waldenström macroglobulinemia	7.76e-06			CD52,CTSL,HMOX1,MMP2,PKP2,POR,PTPN1,SERPINB5,STAT3,STIP1,TNFAIP3	11
Cancer,Hematological Disease,Immunological Disease,Organismal Injury and Abnormalities	B-cell lymphoma	8.49e-06			APP,ARMC9,CD36,CD44,CD52,CD63,CTSL,HMOX1,HSPH1,IL2RG,LGALS1,LRRFIP1,MMP2,PKP2,POR,PSME4,PTPN1,RND3,SAMHD1,SERPINB5,STAT3,STIP1,TNFAIP3,TRHDE,YWHAZ	25
Cardiovascular Disease,Organismal Injury and Abnormalities	Intermediate disease stage peripheral arterial disease	8.65e-06			ADGRE5,APOE,CTSA,CTSC,CYTIP,KLF4,THBS1,TREM1	8
Cancer,Hematological Disease,Immunological Disease,Organismal Injury and Abnormalities	Mature B-cell neoplasm	9.83e-06			APOE,APP,ARMC9,ATP1B1,CD36,CD44,CD52,CD63,CTSC,CTSL,DAPK1,HMOX1,HSPH1,IL2RG,LRRFIP1,MALAT1,MMP2,PKP2,POR,PSME4,PTPN1,RND3,SAMHD1,SERPINB5,SOD2,STAT3,STIP1,TNFAIP3,TRHDE,WDR74,YWHAZ	31
Cancer,Organismal Injury and Abnormalities	Papillary adenocarcinoma	1.06e-05			APOC1,ATP1B1,CD44,CENPU,FABP4,FGF18,HSPA9,MMP2,MT-ND3,MT1E,RGCC,RSF1,SERPING1,THBS1	14
Cell Morphology,Cell-To-Cell Signaling and Interaction,Cellular Assembly and Organization	Morphology of intercellular junctions	1.06e-05			APOE,APP,ARF6,HSPA4,LGALS1,RBM3,STIP1,THBS1	8
Cellular Function and Maintenance	Uptake of lymphatic system cells	1.06e-05			APP,MSR1,TNFAIP3	3
Cell Morphology,Organismal Injury and Abnormalities	Hypertrophy of astrocytes	1.06e-05			APP,KLF4,STAT3	3
Cancer,Organismal Injury and Abnormalities,Reproductive System Disease	Breast or ovarian cancer	1.07e-05			AKR1C1/AKR1C2,AKR1C3,APOE,APP,ARF6,ARMC9,B3GNT5,CD163L1,CD36,CD44,CENPU,CTSC,DAPK1,DPYSL2,FABP4,FGF18,HLA-DRB5,HMOX1,HRH1,HSPA9,HSPB1,HSPD1,HSPE1,IGFBP2,IL2RG,JUND,KIF16B,KLF4,LGALS1,LRRFIP1,MALAT1,MMP2,MSR1,MT-TE,MT1E,MT1G,MT1X,MT2A,NCL,NEDD9,OOEP,PELI1,PKP2,PLIN2,POR,PSME4,PTPN1,RGCC,RND3,RSF1,S100A8,SERPINB5,SERPING1,SMIM4,SOD2,STAT3,TANC2,THBS1,TRHDE,UBC,UTY,WDR74,YWHAZ	63
Hereditary Disorder,Neurological Disease,Organismal Injury and Abnormalities	Familial neurological disorder	1.15e-05			APOC1,APOE,APP,ARF6,ARMC9,ATP1B1,C1QB,CD36,CD44,CHCHD10,CSTB,CTSA,DNAJB1,FGD4,FTL,HLA-DRB5,HMOX1,HRH1,HSPA1A/HSPA1B,HSPB1,HSPD1,KLF4,MT-ND3,MT-TE,MT-TP,MT-TQ,MT-TV,MT1E,MT1G,MT1X,MT2A,PLD3,POR,RBP4,SAMHD1,SCD,SOD2,TANC2,THBS1,UQCRQ,YWHAZ	41
Cancer,Organismal Injury and Abnormalities	Invasive cancer	1.26e-05			AKR1C1/AKR1C2,AKR1C3,CD36,CD44,CENPU,COLEC12,DPYSL2,FABP4,FTL,HMOX1,HSPA1A/HSPA1B,IL2RG,LGALS1,MALAT1,MMP2,MT1E,POR,PTPN1,RSF1,SERPING1,STAT3,THBS1	22
Cancer,Hematological Disease,Immunological Disease,Organismal Injury and Abnormalities	B-cell non-Hodgkin lymphoma	1.39e-05			APP,ARMC9,CD36,CD52,CD63,CTSL,HMOX1,HSPH1,IL2RG,LRRFIP1,MMP2,PKP2,POR,PSME4,PTPN1,RND3,SAMHD1,SERPINB5,STAT3,STIP1,TNFAIP3,TRHDE,YWHAZ	23
Cancer,Hematological Disease,Immunological Disease,Organismal Injury and Abnormalities	B cell cancer	1.41e-05			APOE,APP,ARMC9,ATP1B1,C1QC,CD36,CD44,CD52,CD63,CTSC,CTSL,DAPK1,HMOX1,HSPB1,HSPH1,IL2RG,KIF16B,LGALS1,LRRFIP1,MALAT1,MMP2,MT-ND3,PKP2,POR,PSME4,PTPN1,RND3,SAMHD1,SERPINB5,SOD2,STAT3,STIP1,TNFAIP3,TRHDE,WDR74,YWHAZ	36
Cancer,Organismal Injury and Abnormalities	Multiple cancers	1.41e-05			AKR1C1/AKR1C2,AKR1C3,APOE,APP,ARF6,ARMC9,B3GNT5,CD163L1,CD36,CD44,CENPU,CTSC,DAPK1,DPYSL2,FABP4,FGF18,HLA-DRB5,HMOX1,HRH1,HSPA9,HSPB1,HSPD1,HSPE1,IGFBP2,IL2RG,JUND,KIF16B,KLF4,LGALS1,LRRFIP1,MALAT1,MMP2,MSR1,MT-TE,MT1E,MT1G,MT1X,MT2A,NCL,NEDD9,OOEP,PELI1,PKP2,PLIN2,POR,PSME4,PTPN1,RGCC,RND3,RSF1,S100A8,SAMHD1,SERPINB5,SERPING1,SMIM4,SOD2,STAT3,TANC2,THBS1,TRHDE,UBC,UTY,WDR74,YWHAZ	64
Carbohydrate Metabolism	Uptake of polysaccharide	1.59e-05			APOE,CAMP,CD44	3
Cancer,Organismal Injury and Abnormalities	Advanced stage carcinoma	1.61e-05			CD44,FGF18,FTL,IL2RG,MALAT1,MMP2,POR,RGCC,RSF1,SCD,SERPING1,STAT3	12
Cell Morphology,Cell-To-Cell Signaling and Interaction,Cellular Assembly and Organization,Nervous System Development and Function,Neurological Disease,Organismal Injury and Abnormalities,Tissue Morphology	Loss of synapse	1.75e-05			APP,HSPA4,RBM3,STIP1	4
Inflammatory Disease,Organismal Injury and Abnormalities	Severe inflammatory disorder	1.82e-05			CAMP,CD44,CD52,CD63,LTA4H,NCL,PABPC1,PDE4B,RPS4Y1,STXBP2,TNFAIP3	11
Cancer,Gastrointestinal Disease,Organismal Injury and Abnormalities	Secondary neoplasm of digestive system	1.87e-05			AKR1C1/AKR1C2,AKR1C3,CD36,CD44,COLEC12,DPYSL2,HMOX1,IGFBP2,MMP2,POR,SOD2,THBS1	12
Cancer,Organismal Injury and Abnormalities,Reproductive System Disease	Breast cancer	1.88e-05			AKR1C1/AKR1C2,AKR1C3,APOE,APP,B3GNT5,CD44,CENPU,CTSC,DAPK1,DPYSL2,FABP4,FGF18,HLA-DRB5,HMOX1,HRH1,HSPB1,HSPD1,IGFBP2,IL2RG,JUND,KLF4,LGALS1,LRRFIP1,MALAT1,MMP2,MT-TE,MT1E,MT1G,MT1X,MT2A,NCL,NEDD9,OOEP,PELI1,PKP2,PLIN2,POR,PTPN1,RND3,RSF1,S100A8,SERPINB5,SERPING1,SMIM4,SOD2,STAT3,THBS1,UBC,UTY,WDR74,YWHAZ	51
Cancer,Hematological Disease,Immunological Disease,Organismal Injury and Abnormalities	Mature B-cell lymphoma	2.03e-05			CD36,CD52,CD63,CTSL,HMOX1,HSPH1,IL2RG,MMP2,PKP2,POR,PTPN1,SAMHD1,SERPINB5,STAT3,STIP1,TNFAIP3,YWHAZ	17
Cancer,Organismal Injury and Abnormalities,Reproductive System Disease	Breast or gynecological cancer	2.09e-05			AKR1C1/AKR1C2,AKR1C3,ANKDD1A,ANKRD28,APOE,APP,ARF6,ARHGAP26,ARMC9,B3GNT5,C1QC,CAMP,CD163L1,CD36,CD44,CENPU,COLEC12,CRIP1,CTSA,CTSC,CTSL,DAPK1,DNAJA4,DPYSL2,FABP4,FGF18,HLA-DRB5,HMOX1,HRH1,HSPA1A/HSPA1B,HSPA9,HSPB1,HSPD1,HSPE1,HSPH1,IFI6,IGFBP2,IL2RG,JUND,KIF16B,KLF4,LCOR,LGALS1,LRRFIP1,MALAT1,MGST1,MMP2,MSR1,MT-TE,MT1E,MT1G,MT1X,MT2A,NCL,NEDD9,OASL,OOEP,PABPC1,PCNX1,PDE4B,PELI1,PKP2,PLAC8,PLIN2,P…	88
Antimicrobial Response,Inflammatory Response	Antimicrobial response	2.17e-05			APP,CAMP,COLEC12,DDX21,DEFB1,IFI6,MSR1,OASL,PLAC8,RBPJ,S100A8,SAMHD1	12
Cellular Assembly and Organization,Nervous System Development and Function,Tissue Morphology	Quantity of presynaptic terminals	2.26e-05			APOE,APP,CTSA	3
Cellular Movement	Invasion of fibrosarcoma cell lines	2.35e-05			ADGRE5,MMP2,SDC2,SOD2	4
Cardiovascular System Development and Function,Skeletal and Muscular System Development and Function	Function of vascular smooth muscle	2.35e-05			APOE,CD44,HMOX1,MMP2	4
Hereditary Disorder,Neurological Disease,Organismal Injury and Abnormalities	Familial encephalopathy	2.57e-05			APOC1,APOE,APP,ARF6,ARMC9,ATP1B1,CD36,CD44,CHCHD10,CSTB,DNAJB1,FTL,HLA-DRB5,HMOX1,HRH1,HSPA1A/HSPA1B,HSPD1,KLF4,MT-ND3,MT-TE,MT-TP,MT-TQ,MT-TV,MT1E,MT1G,MT1X,MT2A,PLD3,RBP4,SAMHD1,SCD,SOD2,UQCRQ,YWHAZ	34
Hereditary Disorder,Metabolic Disease,Neurological Disease,Organismal Injury and Abnormalities,Psychological Disorders,Skeletal and Muscular Disorders	MELAS syndrome	3.09e-05			MT-TE,MT-TP,MT-TQ,MT-TV	4
Neurological Disease,Organismal Injury and Abnormalities	Leukoencephalopathy	3.27e-05			APOE,HSPD1,MT-ND3,MT-TE,MT-TP,MT-TQ,MT-TV,SOD2,UQCRQ	9
Cardiovascular Disease,Metabolic Disease,Neurological Disease,Organismal Injury and Abnormalities,Psychological Disorders	Cerebral amyloid angiopathy of leptomeningeal vessel	3.38e-05			APOE,APP	2
Cellular Compromise	Oxidative stress response of cerebral cortex	3.38e-05			APOE,APP	2
Cellular Assembly and Organization,Cellular Compromise	Disruption of DMPC vesicles	3.38e-05			APOE,APP	2
Lipid Metabolism,Molecular Transport,Small Molecule Biochemistry	Uptake of myristic acid	3.38e-05			CD36,THBS1	2
Connective Tissue Development and Function	Protection of pericytes	3.38e-05			APOE,APP	2
Organismal Injury and Abnormalities,Reproductive System Disease	Benign pelvic disease	3.43e-05			ADGRE5,APOE,ATP1B1,CD44,CTSC,HSPA1A/HSPA1B,HSPB1,IL2RG,MALAT1,MGST1,MMP2,MT1E,MT1G,MT1X,PLD3,RBP4,RGCC,RPS23,S100A8,SDC2,SOD2	21
Cell-To-Cell Signaling and Interaction	Response of endothelial cells	3.51e-05			APP,CD36,S100A8,THBS1	4
Lipid Metabolism,Molecular Transport,Small Molecule Biochemistry	Accumulation of cholesterol ester	3.51e-05			APOC1,APOE,FABP4,MSR1	4
Post-Translational Modification,Protein Folding	Folding of protein	3.75e-05			DNAJA4,DNAJB1,HSPA1A/HSPA1B,HSPB1,HSPD1,HSPE1	6
Humoral Immune Response,Inflammatory Response	Complement activation	3.92e-05			APOE,C1QB,C1QC,CFD,RGCC	5
Cell Morphology,Hematological System Development and Function	Conversion of blood cells	3.98e-05			HMOX1,LGALS1,THBS1,TNFAIP3	4
Lipid Metabolism,Molecular Transport,Small Molecule Biochemistry	Transport of long chain fatty acid	4.49e-05			APOE,CD36,FABP4,PLIN2	4
Cancer,Organismal Injury and Abnormalities	Anogenital cancer	4.49e-05			ADGRE5,AKR1C1/AKR1C2,AKR1C3,ANKDD1A,ANKRD28,APOE,APP,ARF6,ARHGAP26,ARMC9,B3GNT5,C1QC,CAMP,CD163L1,CD36,CD44,CD52,CENPU,COLEC12,CRIP1,CTSA,CTSC,CTSL,CYTIP,DAPK1,DEFB1,DNAJA4,DPYSL2,FABP4,FGD4,FGF18,HLA-DRB5,HMOX1,HRH1,HSPA1A/HSPA1B,HSPA4,HSPA9,HSPB1,HSPD1,HSPE1,HSPH1,IFI6,IGFBP2,IL2RG,JUND,KIF16B,KLF4,LCOR,LGALS1,LRRFIP1,MALAT1,MGST1,MMP2,MSR1,MT-TE,MT1E,MT1G,MT1X,MT2A,NCL,NEDD9,OASL,OOEP,PABPC1,P…	97
Cardiovascular Disease,Organismal Injury and Abnormalities	Abdominal aortic aneurysm	4.54e-05			APOE,CTSC,CTSL,FTL,MMP2	5
Gastrointestinal Disease,Organismal Injury and Abnormalities	Periodontal disease	4.67e-05			CD52,CTSC,HSPA1A/HSPA1B,PDE4B,PLAC8,RPS27,STAT3,TNFAIP3	8
Infectious Diseases,Organismal Injury and Abnormalities	Infection by coronavirus	4.96e-05			HLA-DRA,HLA-DRB5,HRH1,HSPA1A/HSPA1B,IFI6,LGALS1,PABPC1,PDE4B,PLAC8,POR,RBP4,S100A8,TNFAIP3,YWHAZ	14
Cell Morphology,Cell-To-Cell Signaling and Interaction,Cellular Assembly and Organization,Nervous System Development and Function,Neurological Disease,Organismal Injury and Abnormalities,Tissue Morphology	Abnormal morphology of synapse	5.11e-05			APOE,APP,HSPA4,LGALS1,RBM3,STIP1	6
Cell Morphology,Renal and Urological System Development and Function	Shape change of kidney cell lines	5.24e-05			ARF6,MSR1,RND3,SOD2,THBS1	5
Cardiovascular Disease,Organismal Injury and Abnormalities	Formation of fatty lesion	5.32e-05			APOE,APP,STAT3	3
Cardiovascular System Development and Function,Organ Morphology,Organismal Development,Skeletal and Muscular System Development and Function	Morphology of cardiac muscle	5.38e-05			APOE,CTSA,KLF4,MMP2,PKP2,POR,RBP4,RBPJ,SOD2,STAT3,TNFAIP3	11
Cancer,Organismal Injury and Abnormalities,Skeletal and Muscular Disorders	Hyperplasia of muscle	5.65e-05			APOE,HMOX1,KLF4,THBS1	4
Metabolic Disease,Neurological Disease,Organismal Injury and Abnormalities,Skeletal and Muscular Disorders	Mitochondrial myopathy	6.71e-05			CHCHD10,MT-ND3,MT-TE,MT-TP,MT-TQ,MT-TV,UQCRQ	7
Cell Cycle	Interphase of central nervous system cells	6.74e-05			APP,SOD2,STAT3	3
Organismal Injury and Abnormalities	Procedure complication	7.34e-05			APP,CD52,DEFB1,HRH1,MMP2,PDE4B,POR,SERPING1,TREM1	9
Endocrine System Disorders,Organismal Injury and Abnormalities	Benign thyroid nodule	7.78e-05			APP,FTL,HSPB1,RBP4	4
Gastrointestinal Disease,Organismal Injury and Abnormalities	Chronic periodontal disease	7.86e-05			CD52,HSPA1A/HSPA1B,PDE4B,PLAC8,RPS27,TNFAIP3	6
Infectious Diseases,Organismal Injury and Abnormalities	COVID-19	7.92e-05			HLA-DRA,HLA-DRB5,HRH1,HSPA1A/HSPA1B,IFI6,LGALS1,PABPC1,PDE4B,PLAC8,POR,RBP4,S100A8,YWHAZ	13
Cancer,Hematological Disease,Organismal Injury and Abnormalities	Myelodysplastic syndrome	8.01e-05			ARHGAP26,ATP1B1,CD36,CD52,DNAJA4,HSPA1A/HSPA1B,IL2RG,MMP2,POR,STAT3,TNFAIP3	11
Neurological Disease,Organismal Injury and Abnormalities	Neurological signs	8.12e-05			APOE,APP,ATP1B1,CD36,CD44,DNAJB1,HLA-DRB5,HMOX1,HRH1,HSPA1A/HSPA1B,MT-ND3,MT-TP,MT1E,MT1G,MT1X,MT2A,RBM3,RBP4,SCD,UQCRQ,YWHAZ	21
Cancer,Organismal Injury and Abnormalities,Reproductive System Disease	Stage II-III breast cancer	8.23e-05			CD44,DPYSL2,HMOX1,POR,RND3,SERPINB5	6
Cancer,Organismal Injury and Abnormalities,Reproductive System Disease	Stage I-III mammary tumor	8.23e-05			CD44,DPYSL2,HMOX1,POR,RND3,SERPINB5	6
Protein Synthesis	Elongation of protein	8.61e-05			MT-TE,MT-TP,MT-TQ,MT-TV	4
Gene Expression	Elongation of mRNA	8.61e-05			MT-TE,MT-TP,MT-TQ,MT-TV	4
Cancer,Organismal Injury and Abnormalities	Head and neck carcinoma	8.7e-05			ADGRE5,AKR1C3,ANKDD1A,ANKRD28,APOC1,APOE,APP,ARF6,ARHGAP26,ARMC9,ARPC2,ATP1B1,ATP1B3,C1QB,CCDC138,CD163L1,CD36,CD44,CENPU,CFD,CHCHD10,COLEC12,CRIP1,CSTB,CTSA,CTSC,CYTIP,DAPK1,DDX21,DNAJA4,DNAJB1,DPYSL2,FABP4,FGD4,FGF18,GPCPD1,HLA-DRA,HLA-DRB5,HMOX1,HPGD,HSPA1A/HSPA1B,HSPA4,HSPA9,HSPB1,HSPD1,HSPH1,IFI6,IFITM10,IL2RG,JUND,KIF16B,KLF4,LCOR,LGALS1,LRRFIP1,MALAT1,MGAT1,MMP2,MOGAT1,MRPL18,MSR1,MT-ND3,M…	108
Lipid Metabolism,Molecular Transport,Small Molecule Biochemistry	Uptake of cholesterol	8.87e-05			AKR1C1/AKR1C2,APOE,CD36,MSR1,TTC39B	5
Cell Morphology	Abnormal morphology of plasma membrane	9.25e-05			APOE,APP,HMOX1,HSPA4,LGALS1,RBM3,STIP1	7
Cancer,Dermatological Diseases and Conditions,Hematological Disease,Immunological Disease,Organismal Injury and Abnormalities	Cutaneous T-cell lymphoma	9.92e-05			IFI6,IL2RG,OASL,POR,RBPJ,STAT3,TNFAIP3	7
Hereditary Disorder,Neurological Disease,Organismal Injury and Abnormalities,Psychological Disorders,Skeletal and Muscular Disorders	Huntington Disease	9.94e-05			APOE,ATP1B1,CD44,DNAJB1,HLA-DRB5,HMOX1,HRH1,HSPA1A/HSPA1B,MT-ND3,MT-TP,MT1E,MT1G,MT1X,MT2A,RBP4,SCD,UQCRQ,YWHAZ	18
Neurological Disease,Organismal Injury and Abnormalities	Gliosis of frontal cortex	0.000101			APP,SOD2	2
Energy Production,Nucleic Acid Metabolism,Small Molecule Biochemistry	Recovery of ATP	0.000101			HSPD1,HSPE1	2
Cellular Assembly and Organization,Neurological Disease,Organismal Injury and Abnormalities	Disaggregation of amyloid fibrils	0.000101			APOE,APP	2
Cardiovascular Disease,Neurological Disease,Organismal Injury and Abnormalities	Acute phase ischemic stroke	0.000101			CD36,THBS1	2
Cell Cycle,Cell Morphology,Cellular Assembly and Organization,Cellular Movement	Elongation of fibrils	0.000101			APP,HSPB1	2
Lipid Metabolism,Molecular Transport,Small Molecule Biochemistry	Uptake of 15-(4-iodophenyl)-3-methylpentadecanoic acid	0.000101			APOC1,CD36	2
Cancer,Cellular Movement,Organismal Injury and Abnormalities,Tumor Morphology	Invasion of adenocarcinoma cells	0.000101			SCGB1A1,SERPINB5	2
Cell-To-Cell Signaling and Interaction,Cellular Function and Maintenance,Connective Tissue Development and Function,Inflammatory Response	Phagocytosis of fibroblasts	0.000101			CD36,THBS1	2
Cell Morphology,Cellular Assembly and Organization,Neurological Disease,Organismal Injury and Abnormalities	Size of amyloid-beta plaques	0.000101			APP,PTPN1	2
Developmental Disorder,Hereditary Disorder,Immunological Disease,Organismal Injury and Abnormalities	Complement component C1q deficiency	0.000101			C1QB,C1QC	2
Cell Morphology,Hematological System Development and Function	Conversion of macrophages	0.000101			HMOX1,LGALS1	2
Cell-To-Cell Signaling and Interaction	Degradation of synapse	0.000101			APP,STAT3	2
Cardiovascular Disease,Organismal Injury and Abnormalities	Leakage of blood vessel	0.000103			APOE,SERPINB5,STAT3	3
Cancer,Organismal Injury and Abnormalities	Malignant solid organ tumor	0.000105			ADGRE5,AHSA1,AKR1C1/AKR1C2,AKR1C3,ANKDD1A,ANKRD28,APOE,APP,ARHGAP26,ARPC2,ATP1B1,ATP1B3,C1QC,C2orf68,CAMP,CD163L1,CD36,CD44,CD52,COLEC12,CTSC,CTSL,CYTIP,DAPK1,DDX21,DEFB1,DNAJB1,DPYSL2,FABP4,FGD4,FTL,GPCPD1,HLA-DRA,HMOX1,HPGD,HRH1,HSPA4,HSPA9,HSPB1,HSPD1,HSPH1,IFI6,IGFBP2,IL2RG,KIF16B,KLF4,LCOR,LGALS1,LRRFIP1,LST1,LTA4H,MGST1,MGST3,MMP2,MOGAT1,MSR1,MT1E,NCL,NEDD9,OASL,OOEP,PABPC1,PABPC4,PCNX1,PDE…	98
Organismal Injury and Abnormalities,Psychological Disorders	Severe psychological disorder	0.000105			APOE,APP,ATP1B1,DPYSL2,HRH1,HSPH1,IGFBP2,LGALS1,MT1E,MT1X,MT2A,NUPR1,PDE4B,PTPN1,SOD2,STAT3,TANC2,THBS1	18
Infectious Diseases,Organismal Injury and Abnormalities,Respiratory Disease	Viral respiratory infection	0.000108			CAMP,CD63,HRH1,LTA4H,NCL,PABPC1,RPS4Y1,STXBP2	8
Cardiovascular System Development and Function	Morphology of cardiovascular system	0.000108			APOE,APP,CD36,CD44,CTSA,CTSC,FGF18,HMOX1,HPGD,IGFBP2,JUND,KLF4,MGAT1,MMP2,PKP2,POR,RBP4,RBPJ,SOD2,STAT3,THBS1,TNFAIP3	22
Inflammatory Response	Rejection	0.000112			DEFB1,IL2RG,MMP2,PDE4B,SERPING1,TREM1	6
Antimicrobial Response,Inflammatory Response	Antibacterial response	0.000114			APP,CAMP,COLEC12,DEFB1,PLAC8,RBPJ,S100A8	7
Cancer,Cell-To-Cell Signaling and Interaction,Organismal Injury and Abnormalities	Activation of tumor cells	0.000115			LGALS1,MMP2,SDC2,SERPINB5	4
Cellular Compromise,Cellular Function and Maintenance	Endoplasmic reticulum stress response	0.000117			DNAJB1,HMOX1,HSPA1A/HSPA1B,HSPD1,HSPE1,HSPH1,PTPN1,THBS1	8
Infectious Diseases,Organismal Injury and Abnormalities,Respiratory Disease	Infection of respiratory tract	0.000131			CAMP,CD63,HRH1,IL2RG,LTA4H,NCL,PABPC1,RPS4Y1,STXBP2	9
Cancer,Dermatological Diseases and Conditions,Organismal Injury and Abnormalities	Skin cancer	0.000132			ADGRE5,AHSA1,AKR1C1/AKR1C2,AKR1C3,ANKDD1A,ANKRD28,APOE,APP,ARHGAP26,ARPC2,ATP1B1,ATP1B3,C1QC,C2orf68,CAMP,CD163L1,CD36,CD44,CD52,COLEC12,CTSC,CTSL,CYTIP,DAPK1,DDX21,DEFB1,DNAJB1,DPYSL2,FABP4,FGD4,FTL,GPCPD1,HLA-DRA,HPGD,HRH1,HSPA4,HSPA9,HSPB1,HSPD1,HSPH1,IFI6,IGFBP2,IL2RG,KIF16B,KLF4,LCOR,LGALS1,LRRFIP1,LST1,LTA4H,MGST1,MGST3,MMP2,MOGAT1,MSR1,MT1E,NCL,NEDD9,OASL,OOEP,PABPC1,PABPC4,PCNX1,PDE4B,PEL…	97
Digestive System Development and Function,Hepatic System Development and Function,Organ Morphology,Organismal Development	Mass of liver	0.000143			APOE,ARF6,FGF18,IGFBP2,MOGAT1,POR,SOD2	7
Organismal Injury and Abnormalities,Respiratory Disease	Severe pulmonary disease	0.000145			CAMP,CD63,LTA4H,NCL,PABPC1,PDE4B,RPS4Y1,STXBP2	8
Cancer,Organismal Injury and Abnormalities,Renal and Urological Disease	Urinary tract cancer	0.000148			APOC1,APOE,APP,ARHGAP26,ATP1B1,CD163L1,CD44,CENPU,CTSL,DAPK1,DDX21,DEFB1,DPYSL2,FABP4,FGF18,HLA-DRA,HMOX1,HSPA1A/HSPA1B,HSPA9,HSPB1,HSPD1,IL2RG,KLF4,LTA4H,MALAT1,MMP2,MSR1,MT1E,PABPC1,PDE4B,PLIN2,POR,RBM3,RBP4,S100A8,SAMHD1,SCD,SERPING1,SMIM4,SOD2,STAT3,THBS1,TRHDE,UTY,WDR74	45
Cardiovascular Disease,Metabolic Disease,Neurological Disease,Organismal Injury and Abnormalities,Psychological Disorders	Cerebral amyloid angiopathy	0.000149			APOE,APP,CD36	3

## Sheet: Bio Functions 15 vs 11
Categories	Diseases or Functions Annotation	p-value	Predicted Activation State	Activation z-score	Molecules	# Molecules
Organismal Injury and Abnormalities,Organismal Survival	Organismal death	1.35e-22	Decreased	-3.902	ABL2,ACTB,ACTG1,ADGRE2,ADM,AKAP13,ALDH1A2,ALDOA,APOC1,APOE,AREG,ARHGDIB,ATF6,ATP1A1,BCL2A1,BCL6,BIRC3,C1QB,C1QC,CCL3L3,CCND3,CD14,CD36,CD44,CD55,CD9,CFD,CFL1,CFLAR,CLIC4,CSGALNACT2,CST3,CSTB,CTSB,CXCL2,CXCL3,CXCL8,DBI,DUSP1,ECE1,EHD1,ETS2,FABP5,FAM20A,FCER1G,FLT1,FPR2,FTL,GABARAP,GABPB1,GCH1,GPR183,GPX1,GRN,GSTP1,H2AZ1,HCK,HIF1A,HIPK2,HNRNPC,HSP90AA1,ICAM1,IL1A,IL1B,IL1RN,IL2RA,INSR,IRAK3,IRF1,IT…	150
Digestive System Development and Function,Hepatic System Development and Function,Organ Development	Response of liver	4.26e-21	Decreased	-3.065	APOE,BCL6,BIRC3,CCL20,CCL3,CCL3L3,CCL4,CD14,CD44,CD55,CXCL2,CXCL3,CXCL8,EGR1,FCGR2A,FLT1,GBP2,GSTP1,HIF1A,IL1A,IL1B,IL1RN,IL2RA,INSR,ITGB2,LCP2,LDLR,LGALS1,MCTP1,NAMPT,NFE2L2,NFKB1,NLRP3,PDE4B,PTEN,PTPN2,RACK1,S100A4,SOD2,STAT3,TKT,TLR4,TNF,TNFAIP3,TNIP1,TSPO,TYROBP,ZBTB16,ZFP36	49
Digestive System Development and Function,Gastrointestinal Disease,Hepatic System Development and Function,Hepatic System Disease,Inflammatory Disease,Inflammatory Response,Organ Development,Organismal Injury and Abnormalities	Inflammation of liver	4.6e-21	Decreased	-2.981	APOE,BCL6,BIRC3,CCL20,CCL3,CCL3L3,CCL4,CD14,CD44,CD55,CXCL2,CXCL3,CXCL8,EGR1,FCGR2A,FLT1,GBP2,GSTP1,HIF1A,IL1A,IL1B,IL1RN,IL2RA,INSR,ITGB2,LCP2,LDLR,LGALS1,MCTP1,NAMPT,NFE2L2,NFKB1,NLRP3,PDE4B,PTEN,PTPN2,RACK1,S100A4,SOD2,STAT3,TKT,TLR4,TNF,TNFAIP3,TNIP1,TSPO,TYROBP,ZFP36	48
Inflammatory Response,Organismal Injury and Abnormalities	Inflammation of body cavity	1.65e-21	Decreased	-2.576	ACTB,ADM,ALDOA,APOE,AREG,ARHGDIB,BCL6,BIRC3,CAPG,CCL20,CCL3,CCL3L3,CCL4,CD14,CD36,CD44,CD55,CH25H,CTSB,CXCL2,CXCL3,CXCL8,DUSP1,EGR1,EREG,FCGR2A,FLT1,FPR2,GADD45B,GBP2,GCH1,GPR132,GPX1,GRN,GSTP1,HIF1A,ICAM1,IL1A,IL1B,IL1RN,IL2RA,INPP5A,INSR,IRAK3,IRF1,ISG20,ITGB2,KCNMA1,LCP2,LDLR,LGALS1,MAP1LC3B,MCTP1,N4BP1,NAMPT,NFAT5,NFE2L2,NFKB1,NFKBIA,NFKBIZ,NLRP3,PDE4B,PTEN,PTGS2,PTPN1,PTPN2,PYCARD,RACK1,S100…	89
Cancer,Organismal Injury and Abnormalities	Benign solid tumor	8.82e-11	Decreased	-2.391	ACSL1,ADGRE5,ALDH1A2,ALDOA,AP2S1,APOC1,APOE,ATP1A1,ATP6V1F,CCND3,CD44,CFD,CTSB,CYBA,DUSP1,EGR1,FABP5,FAM20A,FLT1,FPR2,GSTP1,HIF1A,IL1A,INSR,LDLRAD4,LGALS1,MYL6,NBPF10 (includes others),NFE2L2,NFKB1,NFKBIA,OAZ1,PAG1,PRKCE,PRKCH,PTEN,PTGS2,PTPN2,RPL19,RPL27,RPS15,RPS19,RPS25,RPS6,S100A11,S100A4,S100A6,S100A8,S100A9,SAV1,SCGB1A1,SOD2,STAT3,STX3,TET2,THBS1,TMEM59,TNFAIP3,TUBA1A	59
Organismal Injury and Abnormalities	Benign lesion	5.94e-12	Decreased	-2.28	ACSL1,ADGRE5,ALDH1A2,ALDOA,AP2S1,APOC1,APOE,ATP1A1,ATP6V1F,CCL3,CCL3L3,CCND3,CD44,CFD,CTSB,CYBA,DUSP1,EGR1,FABP5,FAM20A,FLT1,FPR2,GSTP1,HCK,HIF1A,IL1A,INSR,KLF7,LDLR,LDLRAD4,LGALS1,MYL6,NBPF10 (includes others),NFE2L2,NFKB1,NFKBIA,NFKBIZ,OAZ1,PAG1,PRKCE,PRKCH,PTEN,PTGS2,PTPN2,RPL19,RPL27,RPS15,RPS19,RPS25,RPS6,S100A11,S100A4,S100A6,S100A8,S100A9,SAV1,SCGB1A1,SLC27A4,SOD2,STAT3,STX3,TET2,THBS1,TME…	68
Organismal Injury and Abnormalities	Non-malignant disorder	1.61e-20	Decreased	-2.257	ACSL1,ACTB,ADGRE5,ALDH1A2,ALDOA,AP2S1,APOC1,APOE,AREG,ATP1A1,ATP6V1F,BCL6,BTG2,CCL20,CCL3,CCL3L3,CCL4,CCL4L1/CCL4L2,CCND3,CD14,CD44,CFD,COX6B1,CST3,CSTB,CTSB,CXCL3,CXCL8,CYBA,DUSP1,DYNLL1,ECE1,EGR1,EIF1,ELL2,ETS2,EZR,FABP5,FAM20A,FCGR2A,FLT1,FPR1,FPR2,FTL,GADD45B,GBP2,GSTP1,HIF1A,HSP90AA1,HSPA8,ICAM1,IL1A,IL1B,IL1R2,IL1RN,IL2RA,INSR,IRF1,ISG20,KCNJ2,KLF7,LDLRAD4,LGALS1,MAFF,MTSS1,MYL6,NAMPT,NBPF1…	118
Cardiovascular Disease,Hematological Disease,Organismal Injury and Abnormalities	Anemia	1.36e-11	Decreased	-2.06	ALDOA,APOE,CCND3,EGR1,FCER1G,FCGR2A,FLT1,GPX1,HCK,HIF1A,ICAM1,IL2RA,N4BP1,NFAT5,NFE2L2,NFKB1,NFKBIA,PTEN,PTGS2,PTPN2,RPL11,RPL15,RPL18,RPL27,RPL35A,RPS14,RPS19,RPS20,RPS26,RPS6,S100A11,SOD2,STAT3,TBXAS1,TET2,TNF,TNFAIP3,TNIP1,TUBA1A	39
Neurological Disease,Organismal Injury and Abnormalities,Psychological Disorders	Disorder of basal ganglia	3.73e-13		-1.98	ACTB,APOE,ARHGDIB,ATP5MG,ATP5MJ,BACH1,BCL6,CCL4,CD44,CFLAR,COPE,COX4I1,COX5B,COX6B1,COX7C,CTSB,EGR1,EZR,FTL,GCH1,GRN,GSTP1,HSP90AA1,HSPA8,IL1A,IL1B,IL1R2,KCNIP4,KCNMA1,LDLR,MAFF,MALT1,MCTP1,MT-ND3,MT2A,NDUFA4,NDUFB10,NFE2L2,NFKB1,PDE4B,PFN1,PLEK,PTGS2,RASGEF1B,RPL13,RPL15,RPL3,SDC4,SDHD,SLC1A2,SLC1A3,SLC25A6,SOD2,SUB1,SYN1,TLR4,TNF,TPI1,TSPO,TUBA1A,UQCR10,UQCRB,USP36,ZBTB16	64
Gastrointestinal Disease,Inflammatory Response,Organismal Injury and Abnormalities	Inflammation of gastrointestinal tract	1.38e-11		-1.832	ADM,AREG,ARHGDIB,BCL2A1,CCL3L3,CD44,CTSB,CXCL2,CXCL3,CXCL8,EREG,FCGR2A,FPR2,GBP2,GCH1,GPR132,GPX1,HIF1A,ICAM1,IL1A,IL1B,IL1RN,IL2RA,INPP5A,IRAK3,KCNMA1,LGALS1,NFE2L2,NFKB1,NFKBIA,NLRP3,PDE4B,PTGS2,PTPN2,PYCARD,S100A8,S100A9,STAT3,TET2,TLR4,TNF,TNFAIP3,TNFAIP6,TNFAIP8,TSPO	45
Infectious Diseases,Organismal Injury and Abnormalities	Replication of RNA virus	4.9e-13		-1.806	AKAP13,ANPEP,ARHGDIB,ATP6V0B,ATP6V1G1,CCL3,CCL3L3,CCL4,CD58,CFLAR,CH25H,CLIC4,COX6A1,CST3,CXCL8,HCK,HSP90AA1,IL1A,IL1B,IL1RN,IRF1,ISG20,NFKB1,NFKBIA,OXSR1,PLK3,PPP1R15A,PTGS2,PTPN1,RHOH,RPS14,RPS5,RPS6,S100A8,S100A9,SNX9,STAT3,STXBP2,SULF2,TLR4,TNF,UBA52,UBAC2,YBX1	44
Infectious Diseases,Organismal Injury and Abnormalities	Replication of virus	2.94e-14		-1.759	AKAP13,ANPEP,ARHGDIB,ATP6V0B,ATP6V1G1,BIRC3,CCL3,CCL3L3,CCL4,CD58,CFLAR,CH25H,CLIC4,COX6A1,CST3,CXCL3,CXCL8,DUSP1,EGR1,HCK,HSP90AA1,IL1A,IL1B,IL1RN,IRF1,ISG20,MNDA,NFKB1,NFKBIA,OXSR1,PLK3,PPP1R15A,PTGS2,PTPN1,RHOH,RPS14,RPS5,RPS6,S100A8,S100A9,SNX9,STAT3,STXBP2,SULF2,TLR4,TNF,UBA52,UBAC2,YBX1	49
Gastrointestinal Disease,Inflammatory Disease,Inflammatory Response,Organismal Injury and Abnormalities	Colitis	3.55e-10		-1.756	ADM,AREG,ARHGDIB,CCL3L3,CD44,CXCL2,CXCL3,CXCL8,EREG,FCGR2A,FPR2,GBP2,GCH1,GPR132,GPX1,ICAM1,IL1A,IL1B,IL1RN,IL2RA,INPP5A,NFE2L2,NFKB1,NFKBIA,NLRP3,PDE4B,PTGS2,PYCARD,S100A8,S100A9,STAT3,TET2,TLR4,TNF,TNFAIP3,TNFAIP8,TSPO	37
Organismal Injury and Abnormalities	Abdominal lesion	7.9e-18		-1.639	ABL2,ACSL1,ACTB,ACTG1,ADGRE2,ADGRE5,ADM,AIF1,AKAP13,ALDH1A2,ALDOA,ANKRD28,ANPEP,AP2S1,APOC1,APOE,AQP9,AREG,ARHGDIB,ARL4C,ARMC9,ATF6,ATP1A1,ATP5MG,ATP6V0E1,ATP6V1F,BACH1,BAZ1A,BCL2A1,BCL6,BIRC3,BLVRB,BTBD19,BTG2,C1QB,C1QC,CAPG,CARD16,CCL20,CCL3,CCL3L3,CCL4,CCND3,CCRL2,CCSER1,CD14,CD300E,CD36,CD44,CD55,CD58,CD63,CD9,CFD,CFL1,CFLAR,CH25H,CHST11,CLIC4,COPE,COX5B,COX6A1,COX6B1,CRYBG1,CSGALNACT2,CSMD1,…	350
Inflammatory Response,Organismal Injury and Abnormalities	Inflammation of organ	8.22e-21		-1.558	ACTB,ADM,AIF1,ALDOA,APOE,AREG,ARHGDIB,ATP1A1,BCL2A1,BCL6,BIRC3,CAPG,CCL20,CCL3,CCL3L3,CCL4,CD14,CD36,CD44,CD55,CFL1,CH25H,CST3,CTSB,CXCL2,CXCL3,CXCL8,DUSP1,EGR1,EHD1,EIF1,EREG,FABP5,FCER1G,FCGR2A,FLT1,FPR2,GADD45B,GBP2,GCH1,GPR132,GPX1,GRN,GSTP1,HCK,HIF1A,ICAM1,IFNGR2,IL1A,IL1B,IL1RN,IL2RA,INPP5A,INSR,IRAK3,IRF1,ISG20,ITGB2,KCNMA1,LCP2,LDLR,LGALS1,MALT1,MAP1LC3B,MCTP1,N4BP1,NAMPT,NFAT5,NFE2L2,NFK…	109
Infectious Diseases,Organismal Injury and Abnormalities	Infection of mammalia	4.94e-16		-1.537	ADGRE5,APOE,AQP9,BCL2A1,BCL6,CAPG,CCL3L3,CD14,CD36,CD44,CFD,CH25H,CLIC4,DUSP1,FCER1G,FCN1,FPR1,GBP2,GRN,HCK,IFNGR2,IL1B,IL1RN,IRF1,ITGB2,NFKB1,NFKBIZ,NLRP3,PRKCE,PYCARD,REL,S100A9,SERPINB9,SLAMF1,STX11,TLR4,TNF	37
Inflammatory Response,Organismal Injury and Abnormalities	Inflammation of absolute anatomical region	3.44e-21		-1.503	ACTB,ADM,AIF1,ALDOA,APOE,AREG,ARHGDIB,BCL6,BIRC3,CAPG,CCL20,CCL3,CCL3L3,CCL4,CD14,CD36,CD44,CD55,CH25H,CST3,CTSB,CXCL2,CXCL3,CXCL8,DUSP1,EGR1,EHD1,EREG,FCER1G,FCGR2A,FLT1,FPR2,GADD45B,GBP2,GCH1,GPR132,GPX1,GRN,GSTP1,HIF1A,ICAM1,IL1A,IL1B,IL1RN,IL2RA,INPP5A,INSR,IRAK3,IRF1,ISG20,ITGB2,KCNMA1,LCP2,LDLR,LGALS1,LITAF,MALT1,MAP1LC3B,MCTP1,N4BP1,NAMPT,NFAT5,NFE2L2,NFKB1,NFKBIA,NFKBIZ,NLRP3,PDE4B,PELI1,…	101
Cancer,Organismal Injury and Abnormalities	Non-hematological solid tumor	1.36e-26		-1.448	ABL2,ACSL1,ACTB,ACTG1,ADGRE2,ADGRE5,ADM,AIF1,AKAP13,ALDH1A2,ALDOA,ANKRD28,ANPEP,AP2S1,APOC1,APOE,APOO,AQP9,AREG,ARHGDIB,ARL4C,ARMC9,ARPC2,ATF6,ATP1A1,ATP5MG,ATP6V0B,ATP6V0E1,ATP6V1F,AVPI1,BACH1,BAZ1A,BCL2A1,BCL6,BIRC3,BLVRB,BTBD19,BTG2,C1QB,C1QC,CAPG,CARD16,CCL20,CCL3,CCL3L3,CCL4,CCND3,CCRL2,CCSER1,CD14,CD300E,CD36,CD44,CD55,CD58,CD63,CD9,CFD,CFL1,CFLAR,CH25H,CHST11,CIAO2B,CLIC4,COPE,COX4I1,COX5B…	374
Cellular Function and Maintenance	Engulfment of tumor cell lines	4.73e-13		-1.423	ACSL1,APOE,ARPC2,ATP6V0E1,ATP6V1F,BTBD19,CD36,CD44,COX4I1,ETS2,EZR,FCER1G,FCGR2A,FCN1,HCK,HSP90AA1,ICAM1,ITGB2,LAMTOR2,MBNL1,PELI1,PFN1,PLEK,PRKCE,RACK1,TMEM165,TNF,TYROBP	28
Cancer,Organismal Injury and Abnormalities	Genitourinary carcinoma	3.43e-10		-1.405	ABL2,ACSL1,ACTB,ACTG1,ADGRE5,ADM,AIF1,AKAP13,ALDH1A2,ALDOA,ANKRD28,ANPEP,APOC1,APOE,AQP9,AREG,ARL4C,ARMC9,ATF6,ATP1A1,ATP5MG,ATP6V0E1,BACH1,BCL6,BLVRB,BTBD19,BTG2,C1QC,CAPG,CARD16,CCL4,CCND3,CCSER1,CD14,CD300E,CD36,CD44,CD55,CD58,CD9,CFLAR,CH25H,CHST11,CIAO2B,COPE,COX4I1,COX5B,COX6A1,COX6B1,CRYBG1,CSGALNACT2,CSMD1,CTSB,CXCL2,CXCL3,CXCL8,CYBA,CYRIA,DENND4A,DENND5A,DLGAP1,DUSP1,DUSP6,ECE1,EEF1B2,EE…	256
Cancer,Hematological Disease,Organismal Injury and Abnormalities	Hematologic cancer of cells	1.25e-11		-1.37	ABL2,ACTG1,ALDH1A2,ANPEP,ARMC9,ATF6,BCL6,BIRC3,BTG2,C1QC,CCL20,CCL3,CCL4,CCND3,CD14,CD300E,CD36,CD44,CD58,CD63,CFL1,CFLAR,CRYBG1,CSMD1,CST3,CXCL8,DENND4A,DLGAP1,DUSP1,EGR1,EHD1,EIF4E,FABP5,FCGR2A,FLT1,FPR2,GADD45B,GBP2,GPR183,HCK,HELB,HIF1A,HLA-DQA2,HOOK2,HSP90AA1,HSPA8,ICAM1,IL1B,IL1RAPL1,IL1RN,IL2RA,INPP5A,IRF1,ISG20,ITGB2,KLF6,LDLR,LGALS1,MALT1,MT-ND3,N4BP1,NAMPT,NFE2L2,NFKB1,NFKBIA,PAG1,PDE4B…	115
Cancer,Organismal Injury and Abnormalities	Solid tumor	8.15e-28		-1.329	ABL2,ACSL1,ACTB,ACTG1,ADGRE2,ADGRE5,ADM,AIF1,AKAP13,ALDH1A2,ALDOA,ANKRD28,ANPEP,AP2S1,APOC1,APOE,APOO,AQP9,AREG,ARHGDIB,ARL4C,ARMC9,ARPC2,ATF6,ATP1A1,ATP5MG,ATP6V0B,ATP6V0E1,ATP6V1F,AVPI1,BACH1,BAZ1A,BCL2A1,BCL6,BIRC3,BLVRB,BTBD19,BTG2,C1QB,C1QC,CAPG,CARD16,CCL20,CCL3,CCL3L3,CCL4,CCND3,CCRL2,CCSER1,CD14,CD300E,CD36,CD44,CD55,CD58,CD63,CD9,CFD,CFL1,CFLAR,CH25H,CHST11,CIAO2B,CLIC4,COPE,COX4I1,COX5B…	380
Cardiovascular System Development and Function,Cellular Development,Cellular Function and Maintenance,Cellular Growth and Proliferation,Organismal Development,Tissue Development	Endothelial cell development	7.02e-13		-1.327	ADM,ALDH1A2,ANPEP,APOE,CD36,CD44,CD9,CLIC4,CTSB,CXCL2,CXCL8,CYBA,EDF1,EGR1,FLT1,FPR2,GPX1,GRN,HIF1A,HIPK2,IL1A,IL1B,IL1RN,KCNJ2,KDM6B,LGALS1,PFKFB3,PRKCE,PTEN,PTGS2,PTPN1,S100A8,S100A9,SDC4,STAT3,THBS1,TNF	37
Neurological Disease,Organismal Injury and Abnormalities,Skeletal and Muscular Disorders	Neuromuscular disease	2.01e-14		-1.214	ACTB,APOE,AREG,ARHGDIB,ATP5MG,ATP5MJ,BACH1,BCL6,CCL4,CD44,CD55,CFLAR,COPE,COX4I1,COX5B,COX6B1,COX7C,CST3,CTSB,EGR1,EZR,FCGR2A,FNDC3A,FTL,GCH1,GPR132,GSTP1,HLA-DQA2,HSP90AA1,HSPA8,IL1A,IL1B,IL1R2,IL1RN,IL2RA,KCNIP4,KCNMA1,LDLR,MAFF,MALT1,MCTP1,MT-ND3,MT2A,NDUFA4,NDUFB10,NFKB1,NLRP3,PDE4B,PFN1,PLEK,POLE4,PPT1,PTGS2,RANBP2,RASGEF1B,RPL13,RPL15,RPL3,RPS6,SDC4,SDHD,SLC1A2,SLC1A3,SLC25A6,SUB1,SYN1,TLR4…	77
Cell Death and Survival,Organismal Injury and Abnormalities	Apoptosis of connective tissue cells	2.05e-11		-1.207	ABL2,ADM,ATF6,BIRC3,CD36,CD44,CFLAR,CLIC4,CXCL8,DUSP1,EIF4E,IL1A,IL1B,INSR,NFAT5,NFE2L2,NFKBIA,NLRP3,PELI1,PPP1R15A,PTEN,PTPN1,PYCARD,REL,S100A8,STAT3,TNF,TNFAIP8,TNIP1,TRAF1	30
Cancer,Hematological Disease,Organismal Injury and Abnormalities	Myeloid or lymphoid neoplasm	2.98e-16		-1.197	ABL2,ACSL1,ACTB,ACTG1,AKAP13,ALDH1A2,ANPEP,APOE,ARMC9,ATF6,BCL6,BIRC3,BTG2,C1QC,CCL20,CCL3,CCL4,CCND3,CCSER1,CD14,CD300E,CD36,CD44,CD58,CD63,CD9,CFL1,CFLAR,CRYBG1,CSGALNACT2,CSMD1,CST3,CXCL2,CXCL8,DENND4A,DLGAP1,DUSP1,ECE1,EGR1,EHD1,EIF4E,FABP5,FCER1G,FCGR2A,FGD4,FLT1,FMN1,FPR2,GADD45B,GBP2,GPR183,GRN,GSTP1,HCK,HELB,HIF1A,HLA-DQA2,HOOK2,HSP90AA1,HSPA8,ICAM1,IL1B,IL1RAPL1,IL1RN,IL2RA,INPP5A,INSR,I…	169
Cancer,Organismal Injury and Abnormalities	Lymphoreticular neoplasm	6.97e-13		-1.193	ABL2,ACSL1,ACTB,AKAP13,ANPEP,ARMC9,BCL6,BIRC3,BTG2,CCL20,CCND3,CD14,CD36,CD44,CD58,CD63,CD9,CFLAR,CRYBG1,CSMD1,CST3,CXCL8,DENND4A,ECE1,EGR1,EHD1,EIF4E,FABP5,FCER1G,FCGR2A,FGD4,FLT1,FMN1,FPR2,GADD45B,GBP2,GPR183,GRN,GSTP1,HCK,HELB,HIF1A,HLA-DQA2,HSP90AA1,HSPA8,ICAM1,IL1B,IL2RA,INSR,IRAK2,IRF1,ISG20,KLF6,LAMTOR2,LDLR,LGALS1,MAFF,MALT1,MAP4K3,MGST3,MIR4435-2HG,MNDA,NAMPT,NBPF10 (includes others),NFE…	131
Tissue Development	Development of epithelial tissue	1.09e-10		-1.186	ADM,ALDH1A2,ANPEP,APOE,CD36,CD44,CD9,CLIC4,CTSB,CXCL2,CXCL8,CYBA,ECE1,EDF1,EGR1,FLT1,FNDC3A,FPR2,GPX1,GRN,HIF1A,HIPK2,IL1A,IL1B,IL1RN,KCNJ2,KDM6B,LGALS1,NFKBIA,PFKFB3,PRKCE,PTEN,PTGS2,PTPN1,RILPL2,S100A8,S100A9,SDC4,STAT3,SULF2,THBS1,TNF	42
Inflammatory Disease,Organismal Injury and Abnormalities	Chronic inflammatory disorder	5.98e-25		-1.165	ACSL1,ADGRE5,ADM,AIF1,AKAP13,ALDOA,APOE,AQP9,AREG,ARHGDIB,BCL6,BIRC3,CAPG,CCL20,CCL3,CCL4,CCRL2,CD36,CD44,CFD,CST3,CTSB,CXCL2,CXCL3,CXCL8,CYBA,DUSP1,DYNLL1,EEF1G,EIF1,EREG,FCGR2A,FCN1,FKBP5,FLT1,FPR2,GADD45B,GBP2,GRN,HCK,HIF1A,HLA-DQA2,HSPA8,ICAM1,IFNGR2,IL1A,IL1B,IL1R2,IL1RN,IL2RA,INPP5A,INSR,ITGB2,LGALS1,MEFV,NAMPT,NDUFB10,NFKB1,NFKBIA,NLRP3,PDE4B,POLE4,PRKCE,PTGS2,PTMA,PTPN1,PTPN2,PYCARD,RPL11…	96
Cancer,Organismal Injury and Abnormalities	Malignant solid tumor	4e-27		-1.164	ABL2,ACSL1,ACTB,ACTG1,ADGRE2,ADGRE5,ADM,AIF1,AKAP13,ALDH1A2,ALDOA,ANKRD28,ANPEP,AP2S1,APOC1,APOE,APOO,AQP9,AREG,ARHGDIB,ARL4C,ARMC9,ARPC2,ATF6,ATP1A1,ATP5MG,ATP6V0B,ATP6V0E1,ATP6V1F,AVPI1,BACH1,BAZ1A,BCL2A1,BCL6,BIRC3,BLVRB,BTBD19,BTG2,C1QB,C1QC,CAPG,CARD16,CCL20,CCL3,CCL3L3,CCL4,CCND3,CCRL2,CCSER1,CD14,CD300E,CD36,CD44,CD55,CD58,CD63,CD9,CFD,CFL1,CFLAR,CH25H,CHST11,CIAO2B,CLIC4,COPE,COX4I1,COX5B…	378
Cellular Development,Cellular Growth and Proliferation	Proliferation of progenitor cells	5.49e-12		-1.147	CCL20,CCL3,CCL4,CCND3,CFL1,CFLAR,CXCL2,CXCL3,CXCL8,EGR1,EIF4E,ETS2,GPX1,GSTP1,HCK,HIF1A,HIPK2,IL1A,IL1B,LCP2,NFKBIA,PAG1,PIK3AP1,PTEN,PTGS2,PTPN2,RPS19,S100A9,SDC4,STAT3,TET2,TLR4,TNF,TNFAIP3,ZBTB16	35
Cardiovascular System Development and Function,Cellular Development,Cellular Function and Maintenance,Cellular Growth and Proliferation,Organismal Development,Tissue Development	Proliferation of endothelial cells	3.58e-11		-1.14	ADM,ALDH1A2,APOE,CD36,CD44,CTSB,CXCL8,CYBA,EDF1,EGR1,FLT1,FPR2,GRN,HIF1A,HIPK2,IL1A,IL1B,IL1RN,KCNJ2,KDM6B,LGALS1,PFKFB3,PRKCE,PTEN,PTGS2,PTPN1,S100A8,S100A9,SDC4,STAT3,THBS1,TNF	32
Cancer,Organismal Injury and Abnormalities	Extrapancreatic malignant tumor	2.01e-24		-1.121	ABL2,ACSL1,ACTB,ACTG1,ADGRE2,ADGRE5,ADM,AIF1,AKAP13,ALDH1A2,ALDOA,ANKRD28,ANPEP,APOC1,APOE,AQP9,AREG,ARHGDIB,ARL4C,ARMC9,ARPC2,ATF6,ATP1A1,ATP5MG,ATP6V0E1,ATP6V1F,BACH1,BAZ1A,BCL2A1,BCL6,BIRC3,BLVRB,BTBD19,BTG2,C1QB,C1QC,CAPG,CARD16,CCL20,CCL3,CCL3L3,CCL4,CCND3,CCRL2,CCSER1,CD14,CD300E,CD36,CD44,CD55,CD58,CD63,CD9,CFD,CFL1,CFLAR,CH25H,CHST11,CIAO2B,CLIC4,COPE,COX4I1,COX5B,COX6A1,COX6B1,CRYBG1,CSG…	368
Cancer,Hematological Disease,Immunological Disease,Organismal Injury and Abnormalities	Lymphocytic cancer	2.98e-11		-1.119	ABL2,ACTG1,ALDH1A2,ANPEP,APOE,ARMC9,ATF6,BCL6,BIRC3,BTG2,C1QC,CCL20,CCL3,CCL4,CCND3,CCSER1,CD14,CD300E,CD36,CD44,CD58,CD63,CFL1,CFLAR,CRYBG1,CSGALNACT2,CSMD1,CST3,CXCL2,CXCL8,DENND4A,DLGAP1,DUSP1,EGR1,EHD1,EIF4E,FABP5,FCGR2A,FLT1,FPR2,GADD45B,GBP2,GPR183,HCK,HELB,HIF1A,HLA-DQA2,HOOK2,HSP90AA1,HSPA8,ICAM1,IL1B,IL1RAPL1,IL1RN,IL2RA,INPP5A,IRF1,ISG20,ITGB2,KDM6B,KLF6,LCP2,LDLR,LGALS1,MALT1,MT-ND3,N4…	126
Cancer,Hematological Disease,Organismal Injury and Abnormalities	Malignant lymphocytic neoplasm	2.98e-11		-1.119	ABL2,ACTG1,ALDH1A2,ANPEP,APOE,ARMC9,ATF6,BCL6,BIRC3,BTG2,C1QC,CCL20,CCL3,CCL4,CCND3,CCSER1,CD14,CD300E,CD36,CD44,CD58,CD63,CFL1,CFLAR,CRYBG1,CSGALNACT2,CSMD1,CST3,CXCL2,CXCL8,DENND4A,DLGAP1,DUSP1,EGR1,EHD1,EIF4E,FABP5,FCGR2A,FLT1,FPR2,GADD45B,GBP2,GPR183,HCK,HELB,HIF1A,HLA-DQA2,HOOK2,HSP90AA1,HSPA8,ICAM1,IL1B,IL1RAPL1,IL1RN,IL2RA,INPP5A,IRF1,ISG20,ITGB2,KDM6B,KLF6,LCP2,LDLR,LGALS1,MALT1,MT-ND3,N4…	126
Cancer,Hematological Disease,Immunological Disease,Organismal Injury and Abnormalities	Tumorigenesis of lymphocytes	6.44e-11		-1.119	ABL2,ALDH1A2,ANPEP,APOE,ARMC9,ATF6,BCL6,BIRC3,BTG2,C1QC,CCL20,CCL3,CCL4,CCND3,CD300E,CD36,CD44,CD58,CD63,CFL1,CFLAR,CRYBG1,CSGALNACT2,CSMD1,CST3,CXCL2,CXCL8,DENND4A,DLGAP1,DUSP1,EGR1,EHD1,EIF4E,FABP5,FCGR2A,FLT1,FPR2,GADD45B,GBP2,GPR183,HCK,HELB,HIF1A,HLA-DQA2,HOOK2,HSP90AA1,HSPA8,ICAM1,IL1B,IL1RAPL1,IL1RN,IL2RA,INPP5A,IRF1,ISG20,ITGB2,KDM6B,KLF6,LCP2,LDLR,LGALS1,MALT1,MT-ND3,N4BP1,NAMPT,NBPF10 (…	115
Cellular Function and Maintenance	Internalization of tumor cell lines	2.09e-10		-1.072	ARPC2,CD44,COX4I1,ETS2,EZR,FCER1G,FCGR2A,FCN1,HCK,ICAM1,ITGB2,LAMTOR2,MBNL1,PELI1,PFN1,PLEK,PRKCE,TMEM165,TNF,TYROBP	20
Cell Death and Survival,Organismal Injury and Abnormalities	Apoptosis of fibroblasts	3.55e-10		-1.048	ABL2,ADM,BIRC3,CFLAR,CLIC4,DUSP1,EIF4E,IL1A,IL1B,INSR,NFE2L2,NFKBIA,PELI1,PPP1R15A,PTEN,PTPN1,PYCARD,REL,S100A8,STAT3,TNF,TNFAIP8,TNIP1,TRAF1	24
Cell Death and Survival,Organismal Injury and Abnormalities	Cell death of lymphoma cell lines	5.77e-12		-1.034	BCL2A1,BIRC3,BTG2,CCND3,CD44,CD55,CFLAR,DUSP1,EGR1,EIF4E,EZR,FCER1G,GPX1,HCK,HNRNPC,LGALS1,NFKB1,NFKBIA,PAG1,PDE4B,PMAIP1,SDC4,SOD2,STAT3,TNF,TNFAIP3	26
Cell Death and Survival,Organismal Injury and Abnormalities	Cell death of fibroblasts	3.43e-11		-1.003	ABL2,ADM,BIRC3,CFLAR,CLIC4,DUSP1,EIF4E,GPX1,HIPK2,IL1A,IL1B,INSR,NFE2L2,NFKB1,NFKBIA,PELI1,PPP1R15A,PTEN,PTPN1,PYCARD,REL,S100A8,SOD2,STAT3,TNF,TNFAIP8,TNIP1,TRAF1	28
Cancer,Organismal Injury and Abnormalities	Generation of tumor	1.15e-10		-0.989	ABL2,ACSL1,ACTB,ACTG1,ADGRE2,ADGRE5,ADM,AIF1,AKAP13,ALDH1A2,ALDOA,ANKRD28,ANPEP,APOC1,APOE,AQP9,AREG,ARL4C,ARMC9,ARPC2,ATF6,ATP1A1,ATP5MG,ATP6V1F,BACH1,BAZ1A,BCL6,BIRC3,BLVRB,BTBD19,BTG2,C1QB,C1QC,CAPG,CARD16,CCL20,CCL3,CCL4,CCND3,CCRL2,CCSER1,CD14,CD300E,CD36,CD44,CD55,CD58,CD9,CFLAR,CHST11,CLIC4,COPE,COX5B,COX6B1,CRYBG1,CSGALNACT2,CSMD1,CST3,CTSB,CXCL2,CXCL8,CYBA,CYRIA,DBI,DENND4A,DENND5A,DLGAP…	303
Cell Death and Survival,Organismal Injury and Abnormalities	Apoptosis of lymphocytes	9.56e-13		-0.986	APOE,BCL2A1,CCL3,CCL4,CD44,CD9,CFLAR,EGR1,EIF4E,ETS2,EZR,GADD45B,GPR132,HIF1A,IL1A,IL1B,IL2RA,INSR,ITGB2,LGALS1,MALT1,NFE2L2,NFKB1,NFKBIA,PRKCE,PTEN,REL,RHOH,RPS6,SERPINB9,STAT3,THBS1,TNF,TRAF1,ZBTB16	35
Cancer,Organismal Injury and Abnormalities	Nonhematologic malignant neoplasm	1.46e-26		-0.982	ABL2,ACSL1,ACTB,ACTG1,ADGRE2,ADGRE5,ADM,AIF1,AKAP13,ALDH1A2,ALDOA,ANKRD28,ANPEP,AP2S1,APOC1,APOE,APOO,AQP9,AREG,ARHGDIB,ARL4C,ARMC9,ARPC2,ATF6,ATP1A1,ATP5MG,ATP6V0B,ATP6V0E1,ATP6V1F,AVPI1,BACH1,BAZ1A,BCL2A1,BCL6,BIRC3,BLVRB,BTBD19,BTG2,C1QB,C1QC,CAPG,CARD16,CCL20,CCL3,CCL3L3,CCL4,CCND3,CCRL2,CCSER1,CD14,CD300E,CD36,CD44,CD55,CD58,CD63,CD9,CFD,CFL1,CFLAR,CH25H,CHST11,CIAO2B,CLIC4,COPE,COX4I1,COX5B…	373
Metabolic Disease,Organismal Injury and Abnormalities	Amyloidosis	2.88e-15		-0.976	ACTB,AIF1,APOC1,APOE,ATP1A1,BCL6,CAPG,CCL3,CCL3L3,CCL4,CD14,CD36,CD63,CD9,CFD,CFL1,CH25H,CST3,CTSB,CXCL8,EEF1G,ETS2,FCGR2A,FKBP5,FLT1,GAS7,GBP2,GPR183,GRN,HIF1A,ICAM1,IL1A,IL1B,INPP5A,INSR,LDLR,LGALS1,NFE2L2,NFKB1,NFKBIZ,OOEP,PRKCE,PTCD1,PTEN,PTGS2,RACK1,S100A9,SLC1A2,SLC1A3,SOD2,STAT3,TLR4,TNF,TSPO,TYROBP	55
Cell Death and Survival,Organismal Injury and Abnormalities	Apoptosis of T lymphocytes	3.83e-14		-0.965	APOE,BCL2A1,CCL3,CCL4,CD44,CD9,CFLAR,EGR1,EIF4E,ETS2,EZR,GADD45B,GPR132,HIF1A,IL1A,IL1B,IL2RA,INSR,ITGB2,LGALS1,NFE2L2,NFKB1,NFKBIA,PRKCE,PTEN,RHOH,RPS6,SERPINB9,STAT3,THBS1,TNF,TRAF1,ZBTB16	33
Cancer,Hematological Disease,Immunological Disease,Organismal Injury and Abnormalities	Neoplasia of leukocytes	2.05e-13		-0.949	ABL2,ACTG1,ALDH1A2,ANPEP,APOE,ARMC9,ATF6,BCL6,BIRC3,BTG2,C1QC,CCL20,CCL3,CCL4,CCND3,CD14,CD300E,CD36,CD44,CD58,CD63,CFL1,CFLAR,CRYBG1,CSGALNACT2,CSMD1,CST3,CXCL2,CXCL8,DENND4A,DLGAP1,DUSP1,EGR1,EHD1,EIF4E,FABP5,FCER1G,FCGR2A,FLT1,FPR2,GADD45B,GBP2,GPR183,HCK,HELB,HIF1A,HLA-DQA2,HOOK2,HSP90AA1,HSPA8,ICAM1,IL1B,IL1RAPL1,IL1RN,IL2RA,INPP5A,INSR,IRF1,ISG20,ITGB2,KCNMA1,KDM6B,KLF6,LCP2,LDLR,LGALS1,MAL…	126
Cancer,Hematological Disease,Organismal Injury and Abnormalities	Hematologic cancer	7.96e-16		-0.925	ABL2,ACSL1,ACTB,ACTG1,AKAP13,ALDH1A2,ANPEP,APOE,ARMC9,ATF6,BCL2A1,BCL6,BIRC3,BTG2,C1QC,CCL20,CCL3,CCL4,CCND3,CCSER1,CD14,CD300E,CD36,CD44,CD58,CD63,CFL1,CFLAR,CRYBG1,CSGALNACT2,CSMD1,CST3,CXCL2,CXCL8,DENND4A,DLGAP1,DUSP1,ECE1,EGR1,EHD1,EIF4E,FABP5,FCER1G,FCGR2A,FGD4,FLT1,FMN1,FPR2,GADD45B,GBP2,GPR183,GRN,GSTP1,HCK,HELB,HIF1A,HLA-DQA2,HOOK2,HSP90AA1,HSPA8,ICAM1,IL1B,IL1RAPL1,IL1RN,IL2RA,INPP5A,INS…	167
Cancer,Organismal Injury and Abnormalities,Reproductive System Disease	Breast or gynecological cancer	4.09e-11		-0.902	ABL2,ACSL1,ACTB,ACTG1,ADM,AIF1,AKAP13,ALDH1A2,ALDOA,ANKRD28,ANPEP,APOE,AQP9,AREG,ARHGDIB,ARL4C,ARMC9,ATF6,ATP1A1,BACH1,BCL6,BIRC3,BTBD19,BTG2,C1QC,CAPG,CARD16,CCL3,CCL4,CCND3,CCSER1,CD14,CD300E,CD36,CD44,CD55,CD9,CFLAR,CHST11,CIAO2B,CLIC4,COPE,COX4I1,COX6B1,CRYBG1,CSGALNACT2,CSMD1,CTSB,CXCL2,CXCL3,CXCL8,CYBA,CYRIA,DENND4A,DLGAP1,DUSP1,ECE1,EEF1B2,EGR1,EIF1,EIF4E,ELL2,ENSA,ETS2,EZR,FABP5,FAM20A,FC…	232
Cell-To-Cell Signaling and Interaction,Cellular Function and Maintenance,Inflammatory Response	Phagocytosis of tumor cell lines	3.84e-10		-0.898	ARPC2,CD44,COX4I1,ETS2,FCER1G,FCGR2A,FCN1,HCK,ICAM1,ITGB2,LAMTOR2,MBNL1,PELI1,PFN1,PLEK,PRKCE,TMEM165,TNF,TYROBP	19
Cell Death and Survival,Organismal Injury and Abnormalities	Apoptosis of mononuclear leukocytes	8.7e-13		-0.863	APOE,BCL2A1,CCL3,CCL4,CD44,CD9,CFLAR,EGR1,EIF4E,ETS2,EZR,GADD45B,GPR132,HIF1A,IL1A,IL1B,IL2RA,INSR,ITGB2,LGALS1,MALT1,NFE2L2,NFKB1,NFKBIA,PRKCE,PTEN,REL,RHOH,RPS6,S100A8,SERPINB9,STAT3,THBS1,TNF,TRAF1,ZBTB16	36
Cancer,Organismal Injury and Abnormalities	Lymphatic system tumor	9.69e-12		-0.858	ABL2,ACTB,ACTG1,ALDH1A2,ANPEP,APOE,ARMC9,ATF6,BCL6,BIRC3,BTG2,C1QC,CCL20,CCL3,CCL4,CCND3,CCSER1,CD14,CD300E,CD36,CD44,CD58,CD63,CFL1,CFLAR,CRYBG1,CSGALNACT2,CSMD1,CST3,CXCL2,CXCL8,DENND4A,DLGAP1,DUSP1,EGR1,EHD1,EIF4E,FABP5,FCGR2A,FLT1,FPR2,GADD45B,GBP2,GPR183,HCK,HELB,HIF1A,HLA-DQA2,HOOK2,HSP90AA1,HSPA8,ICAM1,IL1B,IL1RAPL1,IL1RN,IL2RA,INPP5A,INSR,IRF1,ISG20,ITGB2,KDM6B,KLF6,LCP2,LDLR,LGALS1,MALT1…	129
Protein Synthesis	Synthesis of protein	4.4e-11		-0.838	ADM,BTG2,EIF1,EIF4E,H2AZ1,HCK,ICAM1,IL1B,INSR,NFKB1,PPP1R15A,PTEN,RACK1,RPL10A,RPL19,RPL27A,RPL30,RPL41,RPLP1,RPS14,RPS15,RPS20,RPS23,RPS3,RPS4Y1,RPS5,RPS6,RPS9,S100A9,SERP1,SOD2,STAT3,THBS1,TLR4,TNF,TNIP1,TP53BP2,USP36,YBX1,ZFP36	40
Cancer,Organismal Injury and Abnormalities	Non-melanoma solid tumor	1.25e-23		-0.835	ABL2,ACSL1,ACTB,ACTG1,ADGRE2,ADGRE5,ADM,AIF1,AKAP13,ALDH1A2,ALDOA,ANKRD28,ANPEP,AP2S1,APOC1,APOE,APOO,AQP9,AREG,ARHGDIB,ARL4C,ARMC9,ARPC2,ATF6,ATP1A1,ATP5MG,ATP6V0B,ATP6V0E1,ATP6V1F,AVPI1,BACH1,BAZ1A,BCL2A1,BCL6,BIRC3,BLVRB,BTBD19,BTG2,C1QB,C1QC,CAPG,CARD16,CCL20,CCL3,CCL3L3,CCL4,CCND3,CCRL2,CCSER1,CD14,CD300E,CD36,CD44,CD55,CD58,CD63,CD9,CFD,CFL1,CFLAR,CH25H,CHST11,CIAO2B,CLIC4,COPE,COX4I1,COX5B…	369
Cell Death and Survival,Organismal Injury and Abnormalities	Cell death of fibrosarcoma cell lines	9.02e-12		-0.816	BCL2A1,BIRC3,CFLAR,CTSB,HIF1A,NAMPT,NFKBIZ,OAZ1,PMAIP1,PTPN2,REL,SOD2,TNF,TRAF1,YBX1	15
Cancer,Cellular Development,Cellular Growth and Proliferation,Organismal Injury and Abnormalities,Tumor Morphology	Proliferation of cancer cells	1.91e-10		-0.81	AREG,BTG2,CCL3,CCND3,CD44,CST3,CTSB,CXCL3,CXCL8,DUSP1,EGR1,EIF4E,EZR,GRN,HIF1A,IL1A,IL1B,IL1RN,INSR,LGALS1,LITAF,PFKFB3,PTEN,PTGS2,PTPN2,S100A6,S100A9,SCHLAP1,STAT3,TET2,THBS1,TNF,YBX1	33
Cancer,Organismal Injury and Abnormalities,Reproductive System Disease	Breast cancer	7.83e-12		-0.808	ABL2,AKAP13,ALDOA,ANPEP,APOE,AREG,ARHGDIB,ARL4C,ATP1A1,BCL6,BTG2,CCL3,CCL4,CCND3,CCSER1,CD14,CD44,CD9,CFLAR,CHST11,CIAO2B,COX4I1,COX6B1,CSMD1,CTSB,CXCL2,CXCL3,CXCL8,CYBA,DUSP1,ECE1,EGR1,EIF1,EIF4E,ENSA,ETS2,EZR,FABP5,FKBP5,FLT1,FMN1,FNDC3A,GADD45B,GAS7,GBP2,GPR132,GPR183,GSTP1,HCK,HELB,HIF1A,HIPK2,HSP90AA1,ICAM1,IL1A,IL1B,IL1R2,IL1RAPL1,IL2RA,INSR,IRAK2,IRF1,KCNMA1,KDM6B,KLF6,LGALS1,MACROH2A1,MAF…	137
Cell Death and Survival,Organismal Injury and Abnormalities	Cell death of lymphocytes	2.36e-14		-0.767	APOE,BCL2A1,CCL3,CCL4,CD44,CD9,CFLAR,CST3,CTSB,EGR1,EIF4E,ETS2,EZR,GADD45B,GPR132,HIF1A,IL1A,IL1B,IL2RA,INSR,ITGB2,LGALS1,MALT1,NFAT5,NFE2L2,NFKB1,NFKBIA,PMAIP1,PRKCE,PTEN,REL,RHOH,RPS6,SERPINB9,STAT3,THBS1,TNF,TNFAIP3,TRAF1,ZBTB16	40
Cell Death and Survival,Organismal Injury and Abnormalities	Cell death of leukemia cell lines	3.68e-12		-0.763	BCL2A1,BIRC3,CD44,CD55,CFLAR,CTSB,DUSP1,EZR,FKBP5,GSTP1,HCK,HSPA8,IL1B,LGALS1,MAP1LC3B,MEFV,NFKB1,NFKBIA,NLRP3,NPC2,PMAIP1,PTEN,PYCARD,REL,RPS19,S100A8,S100A9,SGMS2,SOD2,STAT3,THBS1,TNF,TNFAIP3,YBX1,ZBTB16	35
Cell Death and Survival,Organismal Injury and Abnormalities	Apoptosis of leukocytes	1.12e-22		-0.73	ANPEP,APOE,BCL2A1,BCL6,BIRC3,CCL3,CCL4,CD14,CD44,CD9,CFLAR,CXCL2,CXCL8,EGR1,EIF4E,ETS2,EZR,FCER1G,GADD45B,GPR132,GRN,HIF1A,IL1A,IL1B,IL1RN,IL2RA,INSR,IRAK3,IRF1,ITGB2,LAMTOR2,LDLR,LGALS1,MALT1,MEFV,NAMPT,NFE2L2,NFKB1,NFKBIA,NLRP3,PIK3AP1,PRKCE,PTEN,REL,RHOH,RPS6,S100A8,SERPINB9,SOD2,STAT3,THBS1,TLR4,TNF,TNFAIP3,TRAF1,ZBTB16	56
Hematological System Development and Function,Tissue Morphology	Quantity of granulocytes	1.95e-16		-0.72	ADGRE5,ARHGDIB,BCL6,CCL3L3,CD36,CFLAR,CXCL2,CXCL8,DUSP1,FCGR2A,FPR1,FPR2,GPR132,GRN,ICAM1,IL1A,IL1B,IL2RA,IRAK3,ITGB2,LDLR,LGALS1,NFKB1,NFKBIA,NLRP3,PDE4B,PRKCE,PTEN,PTGS2,REL,S100A8,S100A9,STAT3,STX11,THBS1,TLR4,TNF,TNFAIP3,YBX1,ZFP36	40
Cell Death and Survival,Organismal Injury and Abnormalities	Cell death of T lymphocytes	3.15e-15		-0.715	APOE,BCL2A1,CCL3,CCL4,CD44,CD9,CFLAR,CST3,EGR1,EIF4E,ETS2,EZR,GADD45B,GPR132,HIF1A,IL1A,IL1B,IL2RA,INSR,ITGB2,LGALS1,NFAT5,NFE2L2,NFKB1,NFKBIA,PMAIP1,PRKCE,PTEN,REL,RHOH,RPS6,SERPINB9,STAT3,THBS1,TNF,TRAF1,ZBTB16	37
Connective Tissue Disorders,Inflammatory Disease,Inflammatory Response,Organismal Injury and Abnormalities,Skeletal and Muscular Disorders	Polyarthritis	3.21e-24		-0.703	ADGRE5,ADM,APOE,BCL6,CCL20,CCL3,CCL4,CD44,DUSP1,FLT1,FPR2,GADD45B,HIF1A,IL1A,IL1B,IL1R2,IL1RN,LGALS1,NFKB1,NFKBIA,PTEN,PTGS2,PTMA,PYCARD,REL,S100A8,S100A9,SLC1A2,SNX9,STAT3,THBS1,TLR4,TNF,TNFAIP3,ZFP36	35
Connective Tissue Disorders,Inflammatory Disease,Inflammatory Response,Organismal Injury and Abnormalities,Skeletal and Muscular Disorders	Collagen-induced arthritis	6.47e-13		-0.694	ADGRE5,CD44,DUSP1,FLT1,IL1B,IL1R2,IL1RN,NFKB1,NFKBIA,PTEN,PTGS2,PTMA,PYCARD,REL,SNX9,THBS1,TLR4,TNF	18
Cancer,Organismal Injury and Abnormalities	Hematological or lymphatic system tumor	9.89e-18		-0.669	ABL2,ACSL1,ACTB,ACTG1,AKAP13,ALDH1A2,ANPEP,APOE,ARMC9,ATF6,BCL2A1,BCL6,BIRC3,BTG2,C1QC,CCL20,CCL3,CCL4,CCND3,CCSER1,CD14,CD300E,CD36,CD44,CD58,CD63,CD9,CFL1,CFLAR,CRYBG1,CSGALNACT2,CSMD1,CST3,CXCL2,CXCL8,DENND4A,DLGAP1,DUSP1,ECE1,EGR1,EHD1,EIF4E,FABP5,FCER1G,FCGR2A,FGD4,FLT1,FMN1,FPR2,GADD45B,GBP2,GPR183,GRN,GSTP1,HCK,HELB,HIF1A,HLA-DQA2,HOOK2,HSP90AA1,HSPA8,ICAM1,IL1A,IL1B,IL1RAPL1,IL1RN,IL2RA,I…	175
Cell Death and Survival,Organismal Injury and Abnormalities	Cell death of mononuclear leukocytes	1.92e-14		-0.66	APOE,BCL2A1,CCL3,CCL4,CD44,CD9,CFLAR,CST3,CTSB,EGR1,EIF4E,ETS2,EZR,GADD45B,GPR132,HIF1A,IL1A,IL1B,IL2RA,INSR,ITGB2,LGALS1,MALT1,NFAT5,NFE2L2,NFKB1,NFKBIA,PMAIP1,PRKCE,PTEN,REL,RHOH,RPS6,S100A8,SERPINB9,STAT3,THBS1,TNF,TNFAIP3,TRAF1,ZBTB16	41
Cancer,Hematological Disease,Organismal Injury and Abnormalities	Neoplasia of blood cells	3.83e-17		-0.657	ABL2,ACSL1,ACTB,ACTG1,AKAP13,ALDH1A2,ANPEP,APOE,ARMC9,ATF6,BCL6,BIRC3,BTG2,C1QC,CCL20,CCL3,CCL4,CCND3,CD14,CD300E,CD36,CD44,CD58,CD63,CD9,CFL1,CFLAR,CRYBG1,CSGALNACT2,CSMD1,CST3,CXCL2,CXCL8,DENND4A,DLGAP1,DUSP1,ECE1,EGR1,EHD1,EIF4E,FABP5,FCER1G,FCGR2A,FGD4,FLT1,FMN1,FPR2,GADD45B,GBP2,GPR183,GRN,GSTP1,HCK,HELB,HIF1A,HLA-DQA2,HOOK2,HSP90AA1,HSPA8,ICAM1,IL1B,IL1RAPL1,IL1RN,IL2RA,INPP5A,INSR,IRAK2,IR…	166
Tissue Morphology	Quantity of progenitor cells	1.71e-11		-0.654	AKAP13,APOE,ARHGDIB,CCND3,CD36,CD44,CD9,CXCL8,DUSP6,ETS2,FCER1G,HIF1A,IL1A,IL1B,IRF1,ITGB2,LCP2,NFAT5,NFE2L2,NFKB1,NFKBIA,PAG1,PIK3AP1,PRKCE,PRKCH,PTEN,PTPN2,RAPGEF2,REL,RHOH,RPS19,RPS6,STAT3,TET2,THBS1,TNF,TNFAIP3,TYROBP,ZBTB16,ZFX	40
Connective Tissue Disorders,Immunological Disease,Inflammatory Disease,Inflammatory Response,Organismal Injury and Abnormalities,Skeletal and Muscular Disorders	Rheumatoid arthritis	2.26e-30		-0.641	ACSL1,ADGRE5,ADM,AIF1,AKAP13,ALDOA,APOE,AQP9,AREG,ARHGDIB,BCL6,CCL20,CCL3,CCL4,CCRL2,CD36,CD44,CFD,CST3,CTSB,CXCL2,CXCL3,CXCL8,DUSP1,DYNLL1,EEF1G,EIF1,FCGR2A,FCN1,FKBP5,FLT1,FPR2,GADD45B,GBP2,GRN,HCK,HIF1A,HLA-DQA2,HSPA8,ICAM1,IL1A,IL1B,IL1R2,IL1RN,IL2RA,ITGB2,LGALS1,MEFV,NAMPT,NDUFB10,NFKB1,NFKBIA,PDE4B,PTGS2,PTMA,PTPN1,RPL11,RPL15,RPL18A,RPL19,RPS13,RPS18,RPS3,S100A8,S100A9,SDC4,SEC62,SLC1A2,SR…	80
Cancer,Hematological Disease,Organismal Injury and Abnormalities	Hematopoietic neoplasm	9.73e-18		-0.634	ABL2,ACSL1,ACTB,ACTG1,AKAP13,ALDH1A2,ANPEP,APOE,ARMC9,ATF6,BCL2A1,BCL6,BIRC3,BTG2,C1QC,CCL20,CCL3,CCL4,CCND3,CCSER1,CD14,CD300E,CD36,CD44,CD58,CD63,CD9,CFL1,CFLAR,CRYBG1,CSGALNACT2,CSMD1,CST3,CXCL2,CXCL8,DENND4A,DLGAP1,DUSP1,ECE1,EGR1,EHD1,EIF4E,FABP5,FCER1G,FCGR2A,FGD4,FLT1,FMN1,FPR2,GADD45B,GBP2,GPR183,GRN,GSTP1,HCK,HELB,HIF1A,HLA-DQA2,HOOK2,HSP90AA1,HSPA8,ICAM1,IL1A,IL1B,IL1RAPL1,IL1RN,IL2RA,I…	174
Cancer,Organismal Injury and Abnormalities	Head and neck tumor	7.54e-11		-0.634	ABL2,ACSL1,ACTB,ACTG1,ADGRE2,ADGRE5,ADM,AIF1,AKAP13,ALDH1A2,ALDOA,ANKRD28,ANPEP,AP2S1,APOC1,APOE,APOO,AQP9,AREG,ARHGDIB,ARL4C,ARMC9,ARPC2,ATF6,ATP1A1,ATP6V0B,ATP6V0E1,BACH1,BAZ1A,BCL6,BIRC3,BLVRB,BTBD19,BTG2,C1QB,CAPG,CCL20,CCND3,CCRL2,CCSER1,CD36,CD44,CD55,CD58,CFD,CFL1,CFLAR,CH25H,CLIC4,COPE,COX5B,CRYBG1,CSGALNACT2,CSMD1,CSTB,CTSB,CXCL2,CXCL3,CXCL8,CYBA,CYRIA,DDAH2,DENND4A,DENND5A,DLGAP1,DUSP1,…	311
Cancer,Organismal Injury and Abnormalities	Malignant genitourinary solid tumor	1.24e-14		-0.617	ABL2,ACSL1,ACTB,ACTG1,ADGRE5,ADM,AIF1,AKAP13,ALDH1A2,ALDOA,ANKRD28,ANPEP,APOC1,APOE,AQP9,AREG,ARHGDIB,ARL4C,ARMC9,ATF6,ATP1A1,ATP5MG,ATP6V0E1,BACH1,BCL6,BIRC3,BLVRB,BTBD19,BTG2,C1QC,CAPG,CARD16,CCL3,CCL4,CCND3,CCSER1,CD14,CD300E,CD36,CD44,CD55,CD58,CD9,CFLAR,CH25H,CHST11,CIAO2B,CLIC4,COPE,COX4I1,COX5B,COX6A1,COX6B1,CRYBG1,CSGALNACT2,CSMD1,CTSB,CXCL2,CXCL3,CXCL8,CYBA,CYRIA,DENND4A,DENND5A,DLGAP1,D…	283
Cellular Development,Cellular Growth and Proliferation,Hematological System Development and Function,Hematopoiesis	Proliferation of hematopoietic progenitor cells	6.04e-13		-0.614	CCL20,CCL3,CCL4,CCND3,CXCL2,CXCL3,CXCL8,EGR1,EIF4E,ETS2,GSTP1,HCK,HIPK2,IL1A,IL1B,LCP2,NFKBIA,PAG1,PIK3AP1,PTEN,PTGS2,PTPN2,RPS19,S100A9,STAT3,TET2,TLR4,TNF,TNFAIP3,ZBTB16	30
Cancer,Cellular Development,Cellular Growth and Proliferation,Organismal Injury and Abnormalities,Tumor Morphology	Proliferation of tumor cells	3.31e-10		-0.603	AREG,BTG2,CCL3,CCND3,CD44,CST3,CTSB,CXCL3,CXCL8,DUSP1,EGR1,EIF4E,EZR,GCH1,GRN,HIF1A,IL1A,IL1B,IL1RN,INSR,LGALS1,LITAF,NFKBIA,PFKFB3,PRKCE,PTEN,PTGS2,PTPN2,S100A6,S100A9,SCHLAP1,STAT3,TET2,THBS1,TLR4,TNF,YBX1,ZFP36	38
Cancer,Organismal Injury and Abnormalities	Advanced extracranial solid tumor	2.5e-13		-0.59	ABL2,ADM,ALDH1A2,ANPEP,ARL4C,CAPG,CARD16,CD36,CD44,CD9,CRYBG1,CTSB,CXCL8,DUSP6,EIF4E,FCGR2A,FLT1,FTL,GCH1,GSTP1,HELB,HIF1A,HSP90AA1,ICAM1,IL1A,IL1B,IL2RA,INSR,KCNJ2,KCNMA1,KLF6,LGALS1,LIMK2,NFKB1,PTEN,PTGS2,RNF144B,RPL27,RPL7,RPS6,S100A11,S100A4,SCGB1A1,SOD2,STAT3,THBS1,TMEM176B,TMSB10/TMSB4X,TNF,TUBA1A	50
Cell Death and Survival,Organismal Injury and Abnormalities	Apoptosis of blood cells	5.34e-23		-0.588	ANPEP,APOE,BCL2A1,BCL6,BIRC3,CCL3,CCL3L3,CCL4,CD14,CD44,CD9,CFLAR,CXCL2,CXCL8,EGR1,EIF4E,ETS2,EZR,FCER1G,GADD45B,GPR132,GRN,HIF1A,HIPK2,IL1A,IL1B,IL1RN,IL2RA,INSR,IRAK3,IRF1,ITGB2,LAMTOR2,LDLR,LGALS1,MALT1,MEFV,NAMPT,NFE2L2,NFKB1,NFKBIA,NLRP3,PFN1,PIK3AP1,PRKCE,PTEN,REL,RHOH,RPS6,S100A8,SERPINB9,SOD2,STAT3,THBS1,TLR4,TNF,TNFAIP3,TRAF1,ZBTB16	59
Cell Death and Survival,Organismal Injury and Abnormalities	Apoptosis of fibrosarcoma cell lines	2.19e-10		-0.575	BCL2A1,BIRC3,CFLAR,CTSB,HIF1A,PMAIP1,PTPN2,REL,SOD2,TNF,TRAF1,YBX1	12
Cancer,Organismal Injury and Abnormalities,Respiratory Disease	Non-small cell lung carcinoma	9.43e-11		-0.563	ABL2,ACTB,AKAP13,ALDH1A2,ALDOA,ANKRD28,ANPEP,APOC1,AREG,ARL4C,ATP1A1,BAZ1A,BCL6,CAPG,CCND3,CD44,CD55,CD9,CFLAR,CRYBG1,CSMD1,CXCL2,CXCL8,CYBA,DBI,DUSP6,EEF1B2,EIF4E,ETS2,EZR,FKBP5,FLT1,FTL,FXYD5,GADD45B,GBP2,GPX1,GRN,GSTP1,HCK,HIF1A,HSP90AA1,HSPA8,ICAM1,IL1A,IL1B,IL1RAPL1,INPP5A,INSR,IRF1,KYNU,LAPTM4A,LDLRAD4,LUCAT1,MALT1,MBNL1,MEFV,MNDA,NACA,NAMPT,NBPF10 (includes others),NFE2L2,NFKB1,NFKBIA,NLRP…	113
Cancer,Organismal Injury and Abnormalities	Incidence of tumor	9.22e-11		-0.56	ABL2,ACSL1,ACTB,ACTG1,ADGRE2,ADGRE5,ADM,AIF1,AKAP13,ALDH1A2,ALDOA,ANKRD28,ANPEP,AP2S1,APOC1,APOE,AQP9,AREG,ARHGDIB,ARL4C,ARMC9,ATF6,ATP1A1,ATP5MG,ATP6V1F,BACH1,BAZ1A,BCL6,BIRC3,BLVRB,BTBD19,BTG2,C1QC,CAPG,CARD16,CCL3,CCL4,CCND3,CCSER1,CD300E,CD36,CD44,CD55,CD58,CD9,CFLAR,CHST11,CLIC4,COPE,COX5B,COX6B1,CRYBG1,CSGALNACT2,CSMD1,CST3,CTSB,CXCL2,CXCL8,CYBA,CYRIA,DBI,DENND4A,DENND5A,DLGAP1,DUSP1,DUSP6,…	283
Cancer,Gastrointestinal Disease,Organismal Injury and Abnormalities	Digestive organ tumor	1.21e-10		-0.556	ABL2,ACSL1,ACTB,ACTG1,ADGRE2,ADGRE5,ADM,AKAP13,ALDH1A2,ALDOA,ANKRD28,ANPEP,APOC1,APOE,AQP9,AREG,ARL4C,ARMC9,ATF6,ATP1A1,ATP5MG,ATP6V1F,BACH1,BAZ1A,BCL2A1,BCL6,BIRC3,BLVRB,C1QB,C1QC,CAPG,CCL20,CCL3L3,CCL4,CCND3,CCRL2,CCSER1,CD14,CD36,CD44,CD58,CD63,CD9,CFD,CFL1,CFLAR,CH25H,CHST11,CLIC4,COPE,CRYBG1,CSGALNACT2,CSMD1,CST3,CSTB,CTSB,CXCL2,CXCL3,CXCL8,CYBA,CYRIA,DBI,DENND4A,DENND5A,DLGAP1,DUSP1,DUSP6,D…	319
Cancer,Organismal Injury and Abnormalities	Extracranial solid tumor	9.68e-26		-0.551	ABL2,ACSL1,ACTB,ACTG1,ADGRE2,ADGRE5,ADM,AIF1,AKAP13,ALDH1A2,ALDOA,ANKRD28,ANPEP,AP2S1,APOC1,APOE,APOO,AQP9,AREG,ARHGDIB,ARL4C,ARMC9,ARPC2,ATF6,ATP1A1,ATP5MG,ATP6V0B,ATP6V0E1,ATP6V1F,AVPI1,BACH1,BAZ1A,BCL2A1,BCL6,BIRC3,BLVRB,BTBD19,BTG2,C1QB,C1QC,CAPG,CARD16,CCL20,CCL3,CCL3L3,CCL4,CCND3,CCRL2,CCSER1,CD14,CD300E,CD36,CD44,CD55,CD58,CD63,CD9,CFD,CFL1,CFLAR,CH25H,CHST11,CIAO2B,CLIC4,COPE,COX4I1,COX5B…	376
Cancer,Organismal Injury and Abnormalities	Tumorigenesis of tissue	3.06e-24		-0.55	ABL2,ACSL1,ACTB,ACTG1,ADGRE2,ADGRE5,ADM,AIF1,AKAP13,ALDH1A2,ALDOA,ANKRD28,ANPEP,AP2S1,APOC1,APOE,APOO,AQP9,AREG,ARHGDIB,ARL4C,ARMC9,ARPC2,ATF6,ATP1A1,ATP5MG,ATP6V0B,ATP6V0E1,ATP6V1F,AVPI1,BACH1,BAZ1A,BCL2A1,BCL6,BIRC3,BLVRB,BTBD19,BTG2,C1QB,C1QC,CAPG,CARD16,CCL20,CCL3L3,CCL4,CCND3,CCRL2,CCSER1,CD14,CD300E,CD36,CD44,CD55,CD58,CD63,CD9,CFD,CFL1,CFLAR,CH25H,CHST11,CIAO2B,CLIC4,COPE,COX4I1,COX5B,COX6…	368
Connective Tissue Disorders,Inflammatory Disease,Organismal Injury and Abnormalities,Skeletal and Muscular Disorders	Rheumatic Disease	6.57e-32		-0.546	ACSL1,ADGRE5,ADM,AIF1,AKAP13,ALDH1A2,ALDOA,APOE,AQP9,AREG,ARHGDIB,ATP5MJ,BCL6,CCL20,CCL3,CCL3L3,CCL4,CCND3,CCRL2,CD36,CD44,CFD,CH25H,CST3,CTSB,CXCL2,CXCL3,CXCL8,DUSP1,DYNLL1,EEF1G,EIF1,FCER1G,FCGR2A,FCN1,FKBP5,FLT1,FPR1,FPR2,FTL,GADD45B,GBP2,GRN,GSTP1,HCK,HIF1A,HLA-DQA2,HSPA8,ICAM1,IL1A,IL1B,IL1R2,IL1RN,IL2RA,IRF1,ITGB2,LDLR,LGALS1,MEFV,NAMPT,NDUFB10,NFE2L2,NFKB1,NFKBIA,NLRP3,PDE4B,PTEN,PTGS2,PTM…	103
Hematological System Development and Function,Tissue Morphology	Quantity of myeloid cells	3.23e-17		-0.54	ADGRE5,APOE,ARHGDIB,BCL2A1,BCL6,BIRC3,CCL3,CCL3L3,CD36,CD9,CFLAR,CLIC4,CTSB,CXCL2,CXCL8,DUSP1,FCGR2A,FPR1,FPR2,GPR132,GRN,HCK,ICAM1,IL1A,IL1B,IL2RA,INSR,IRAK3,ITGB2,LDLR,LGALS1,LITAF,NFE2L2,NFKB1,NFKBIA,NLRP3,PDE4B,PRKCE,PTEN,PTGS2,PTPN2,RAPGEF2,REL,RPS19,S100A8,S100A9,STAT3,STX11,TET2,THBS1,TLR4,TNF,TNFAIP3,TYROBP,YBX1,ZFP36	56
Cell Death and Survival,Organismal Injury and Abnormalities	Cell death of myeloid cells	4.39e-20		-0.525	ANPEP,APOE,BCL2A1,BCL6,BIRC3,CD14,CD44,CFLAR,CTSB,CXCL2,CXCL8,FCER1G,GPR132,HIF1A,HIPK2,IL1B,IL1RN,IRAK3,IRF1,ITGB2,LDLR,LGALS1,MEFV,NAMPT,NFE2L2,NFKBIA,NLRP3,PIK3AP1,PMAIP1,PRKCE,PTEN,PYCARD,S100A8,SOD2,STAT3,TLR4,TNF,TNFAIP3,ZFP36	39
Cell Death and Survival,Organismal Injury and Abnormalities	Apoptosis of myeloid cells	7e-18		-0.516	ANPEP,APOE,BCL2A1,BCL6,BIRC3,CD14,CD44,CFLAR,CXCL2,CXCL8,FCER1G,GPR132,HIF1A,HIPK2,IL1B,IL1RN,IRAK3,IRF1,ITGB2,LDLR,LGALS1,MEFV,NAMPT,NFE2L2,NFKBIA,PIK3AP1,PRKCE,PTEN,S100A8,SOD2,STAT3,TLR4,TNF	33
Cellular Development,Cellular Growth and Proliferation,Hematological System Development and Function,Hematopoiesis	Proliferation of hematopoietic cells	4.17e-13		-0.494	CCL20,CCL3,CCL3L3,CCL4,CCND3,CXCL2,CXCL3,CXCL8,EGR1,EIF4E,ETS2,GSTP1,HCK,HIPK2,IL1A,IL1B,LCP2,NFKBIA,PAG1,PIK3AP1,PTEN,PTGS2,PTPN2,RPS19,S100A9,STAT3,TET2,TLR4,TNF,TNFAIP3,ZBTB16	31
Cell Death and Survival,Gastrointestinal Disease,Hepatic System Disease,Organismal Injury and Abnormalities	Necrosis of liver	2.87e-11		-0.49	ABL2,ADM,APOE,BIRC3,CCL4,CD14,CFLAR,CTSB,CXCL3,GADD45B,IL1B,IL1RN,IRF1,ITGB2,LDLR,NAMPT,NFE2L2,NFKB1,NFKBIA,PTGS2,PTPN1,REL,SOD2,STAT3,TLR4,TNF,TNIP1,TYROBP	28
Dermatological Diseases and Conditions,Inflammatory Disease,Inflammatory Response,Organismal Injury and Abnormalities	Dermatitis	2.87e-17		-0.469	APOE,AREG,ATP1A1,CAPG,CCL20,CD44,CD55,CFL1,CST3,CXCL8,DUSP1,EIF1,EREG,FABP5,FCER1G,FCGR2A,GSTP1,HCK,ICAM1,IFNGR2,IL1A,IL1B,IL1RN,IL2RA,INSR,ITGB2,LCP2,LDLR,LGALS1,MALT1,NFKB1,NFKBIA,NFKBIZ,NLRP3,PDE4B,PTGS2,REL,S100A11,S100A8,S100A9,SGMS2,THBS1,TLR4,TNF,TNFAIP3,TNIP1,TPI1,TUBA1A,ZFP36	49
Connective Tissue Disorders,Inflammatory Disease,Inflammatory Response,Organismal Injury and Abnormalities,Skeletal and Muscular Disorders	Experimentally-induced arthritis	2.42e-19		-0.467	ADGRE5,CCL3L3,CCL4,CD44,CH25H,CXCL2,CXCL8,DUSP1,FCGR2A,FLT1,FPR2,HCK,IL1B,IL1R2,IL1RN,NAMPT,NFKB1,NFKBIA,PTEN,PTGS2,PTMA,PYCARD,REL,SDC4,SNX9,STAT3,THBS1,TLR4,TNF,TNFAIP6	30
Cellular Growth and Proliferation	Colony formation	5.19e-11		-0.463	AKAP13,AREG,BCL6,CCL3,CCL3L3,CCL4,CD44,CD9,CTSB,CXCL3,CXCL8,DUSP1,DUSP6,EGR1,EIF4E,EREG,EZR,FLT1,GADD45B,GRN,HCK,HIF1A,IL1A,IL1B,IL1RN,INSR,IRF1,KLF6,MBNL1,NFKBIA,PLK3,PPP1R15A,PTEN,PTGS2,PTPN1,RACK1,RNF144B,RPS19,S100A6,SEC62,SENP3-EIF4A1,SOD2,SRGAP1,STAT3,TET2,TNF,TNFAIP3,ZBTB16	48
Cellular Function and Maintenance	Engulfment of cells	3.47e-24		-0.456	ABL2,ACSL1,ANPEP,AP2S1,APOE,ARPC2,ATP6V0E1,ATP6V1F,BTBD19,CAPG,CCL3,CCL4,CD14,CD36,CD44,CD63,CH25H,CLIC4,COX4I1,CYBA,EGR1,EHD1,EIF4E,ETS2,EZR,FCER1G,FCGR2A,FCN1,FGD4,FPR1,FPR2,GRN,GSTP1,HCK,HIF1A,HSP90AA1,HSPA8,ICAM1,IL1A,IL1B,ITGB2,LAMTOR2,LDLR,MBNL1,NFE2L2,PELI1,PFKFB3,PFN1,PLEK,PPT1,PRKCE,PTEN,PTPN1,PYCARD,RACK1,S100A9,THBS1,TLR4,TMEM165,TNF,TYROBP,VAMP8,ZFYVE16	63
Cell Death and Survival,Organismal Injury and Abnormalities	Necrosis of epithelial tissue	1.21e-17		-0.455	ABL2,ADM,BCL2A1,BCL6,BIRC3,CCL4,CD36,CD44,CFLAR,CLIC4,CTSB,CXCL3,CXCL8,DUSP6,DYNLL1,EGR1,EIF4E,FLT1,GADD45B,GAS7,GPX1,GRN,HIPK2,ICAM1,IL1B,IL1RN,IRAK3,IRF1,LDLR,LGALS1,MAP1LC3B,MEFV,NAMPT,NFE2L2,NFKB1,NFKBIA,NLRP3,PLK3,PMAIP1,PPP1R15A,PRKCE,PTEN,PTGS2,PTPN1,PTPN2,PYCARD,REL,S100A8,SDHD,SFTPC,SOD2,STAT3,THBS1,TLR4,TNF,TNFAIP3,TNFAIP8,TNIP1,TP53BP2,TRAF1	60
Protein Synthesis	Metabolism of protein	3.99e-15		-0.441	ADM,APOE,ATF6,BTG2,CFL1,CST3,CSTB,CTSB,DLGAP1,ECE1,EIF1,EIF4E,FCN1,GRN,GSAP,H2AZ1,HCK,HSP90AA1,HSPA8,ICAM1,IL1B,IL1RN,INSR,IRAK3,LDLR,LTA4H,MALT1,NACA,NFKB1,OAZ1,PFN1,PPP1R15A,PTEN,PTPN2,PYCARD,RACK1,RNF144B,RPL10A,RPL11,RPL19,RPL27A,RPL30,RPL41,RPLP1,RPS14,RPS15,RPS20,RPS23,RPS3,RPS4Y1,RPS5,RPS6,RPS9,S100A4,S100A9,SAV1,SDC4,SERP1,SOD2,ST6GALNAC3,STAT3,THBS1,TLR4,TNF,TNFAIP3,TNIP1,TP53BP2,TYROBP,…	72
Cell Death and Survival,Organismal Injury and Abnormalities	Cell death of sarcoma cell lines	1.29e-12		-0.435	BCL2A1,BCL6,BIRC3,CFLAR,CTSB,DUSP6,HCK,HIF1A,IL1B,IRF1,NAMPT,NFKBIA,NFKBIZ,OAZ1,PMAIP1,PTPN2,PYCARD,RACK1,REL,RPS15,RPS20,S100A11,SIPA1L1,SOD2,TNF,TP53BP2,TRAF1,YBX1	28
Cardiovascular System Development and Function,Organismal Development	Vasculogenesis	9.79e-12		-0.435	ADM,AIF1,ALDH1A2,ANPEP,APOE,CD36,CD44,CD63,CD9,CLIC4,CST3,CTSB,CXCL2,CXCL8,CYBA,ECE1,EDF1,EGR1,FLT1,FPR2,GPX1,GRN,HIF1A,HIPK2,ICAM1,IL1A,IL1B,IL1RN,INSR,IRF1,ITGB2,KCNJ2,KCNMA1,KDM6B,KLF7,LDLR,LGALS1,NFE2L2,NFKBIA,PFKFB3,PRKCE,PTEN,PTGS2,PTPN1,RAPGEF2,RIN2,S100A4,S100A8,S100A9,SCGB3A1,SDC4,STAT3,STXBP2,SULF2,THBS1,TKT,TLR4,TNF,TNFAIP3	59
Cancer,Organismal Injury and Abnormalities	Anogenital cancer	2.93e-11		-0.434	ABL2,ACSL1,ACTB,ACTG1,ADGRE5,ADM,AIF1,AKAP13,ALDH1A2,ALDOA,ANKRD28,ANPEP,APOE,AQP9,AREG,ARHGDIB,ARL4C,ARMC9,ATF6,ATP1A1,BACH1,BCL6,BIRC3,BTBD19,BTG2,C1QC,CAPG,CARD16,CCL3,CCL4,CCND3,CCSER1,CD14,CD300E,CD36,CD44,CD55,CD58,CD9,CFLAR,CHST11,CIAO2B,CLIC4,COPE,COX4I1,COX6B1,CRYBG1,CSGALNACT2,CSMD1,CTSB,CXCL2,CXCL3,CXCL8,CYBA,CYRIA,DENND4A,DENND5A,DLGAP1,DUSP1,DUSP6,ECE1,EEF1B2,EEF1G,EGR1,EIF1,EIF4E,EL…	259
Cellular Function and Maintenance	Endocytosis	2.16e-25		-0.427	ABL2,ACSL1,ACTB,ACTG1,AP2S1,APOC1,APOE,ARPC2,ATP6V0E1,ATP6V1F,BTBD19,CAPG,CCL3,CCL4,CD14,CD36,CD44,CD63,CH25H,CLIC4,COX4I1,EGR1,EHD1,EIF4E,ETS2,EZR,FCER1G,FCGR2A,FCN1,FGD4,FPR1,FPR2,GRN,GSTP1,HCK,HIF1A,HOOK2,HSP90AA1,HSPA8,ICAM1,IL1B,INSR,ITGB2,LAMTOR2,LDLR,MBNL1,MCTP1,NFE2L2,PELI1,PFKFB3,PFN1,PLEK,PPT1,PRKCE,PTEN,PTPN1,PYCARD,RACK1,S100A9,SNX9,THBS1,TLR4,TMEM165,TNF,TYROBP,VAMP8,ZFYVE16	67
Cancer,Organismal Injury and Abnormalities	Formation of solid tumor	5.83e-12		-0.421	ABL2,ACSL1,ACTB,ACTG1,ADGRE2,ADGRE5,ADM,AIF1,AKAP13,ALDH1A2,ALDOA,ANKRD28,ANPEP,AP2S1,APOC1,APOE,AQP9,AREG,ARHGDIB,ARL4C,ARMC9,ARPC2,ATF6,ATP1A1,ATP5MG,ATP6V1F,BACH1,BAZ1A,BCL6,BIRC3,BLVRB,BTBD19,BTG2,C1QB,C1QC,CAPG,CARD16,CCL20,CCL3,CCL4,CCND3,CCRL2,CCSER1,CD14,CD300E,CD36,CD44,CD55,CD58,CD9,CFLAR,CHST11,CIAO2B,CLIC4,COPE,COX5B,COX6B1,CRYBG1,CSGALNACT2,CSMD1,CST3,CTSB,CXCL2,CXCL8,CYBA,CYRIA,DBI,…	312
Connective Tissue Disorders,Inflammatory Disease,Inflammatory Response,Organismal Injury and Abnormalities,Skeletal and Muscular Disorders	Inflammation of joint	2.53e-32		-0.417	ACSL1,ADGRE5,ADM,AIF1,AKAP13,ALDH1A2,ALDOA,APOE,AQP9,AREG,ARHGDIB,ATP5MJ,BCL6,CCL20,CCL3,CCL3L3,CCL4,CCND3,CCRL2,CD36,CD44,CFD,CH25H,CST3,CTSB,CXCL2,CXCL3,CXCL8,DUSP1,DYNLL1,EEF1G,EIF1,FCER1G,FCGR2A,FCN1,FKBP5,FLT1,FPR2,FTL,GADD45B,GBP2,GRN,HCK,HIF1A,HLA-DQA2,HSPA8,ICAM1,IL1A,IL1B,IL1R2,IL1RN,IL2RA,IRF1,ITGB2,LDLR,LGALS1,MEFV,NAMPT,NDUFB10,NFKB1,NFKBIA,NLRP3,PDE4B,PTEN,PTGS2,PTMA,PTPN1,PYCARD,REL…	100
Gastrointestinal Disease,Organismal Injury and Abnormalities	Damage of digestive system	2.4e-15		-0.405	ADM,APOE,AREG,CCL4,CD14,CD44,CTSB,DUSP1,EGR1,FLT1,GSTP1,HCK,HIF1A,IL1A,IL1B,IL1RN,IRF1,ITGB2,KCNIP4,NFE2L2,NFKB1,NLRP3,PTEN,PTGS2,PTPN1,PYCARD,SDC4,STAT3,TLR4,TNF,TNFAIP3,TNFAIP6,TRAF1,VAMP8	34
Neurological Disease,Organismal Injury and Abnormalities	Progressive neurological disorder	5.37e-19		-0.391	ACTB,ACTG1,AIF1,APOC1,APOE,AREG,ARHGDIB,ATP1A1,BACH1,CCL3,CCL3L3,CCL4,CD14,CD36,CD44,CFD,CFL1,CFLAR,CH25H,COPE,CST3,CSTB,CTSB,CXCL8,DBI,EEF1G,EGR1,ETS2,EZR,FCGR2A,FKBP5,FLT1,FTL,GAS7,GBP2,GCH1,GPR132,GPR183,GRN,GSTP1,HIF1A,HLA-DQA2,HSP90AA1,ICAM1,IL1A,IL1B,IL1R2,IL2RA,INPP5A,INSR,KCNMA1,LDLR,LGALS1,NFE2L2,NFKBIZ,NLRP3,OAZ1,OOEP,PDE4B,PFN1,POLE4,PRKCE,PTCD1,PTEN,PTGS2,RACK1,RPL13,RPL15,RPL3,RPS6,S…	87
Organismal Injury and Abnormalities	Fibrosis	2.52e-14		-0.382	ACSL1,APOE,ATF6,BCL6,CCL3L3,CCL4,CD36,CD44,CD55,CD9,CFLAR,CST3,CTSB,CXCL8,EGR1,FLT1,GBP2,GPX1,GSTP1,HCK,HIF1A,ICAM1,IFNGR2,IL1A,IL1B,IL1R2,IL1RN,IL2RA,INPP5A,IRAK2,IRAK3,IRF1,KLF6,LDLR,LGALS1,MAFF,MAP1LC3B,MBNL1,MNDA,MTSS1,NAMPT,NFE2L2,NFKB1,NFKBIA,NLRP3,PFKFB3,PTEN,PTGS2,PTPN2,RACK1,REL,SAV1,SCGB1A1,SFTPC,SOD2,STAT3,TET2,THBS1,TLR4,TNF,TNFAIP3,ZBTB16	62
Cellular Function and Maintenance,Inflammatory Response	Phagocytosis	2.06e-19		-0.372	ABL2,ANPEP,ARPC2,CAPG,CCL3,CD14,CD36,CD44,CH25H,CLIC4,COX4I1,CYBA,EHD1,EIF4E,ETS2,FCER1G,FCGR2A,FCN1,FPR1,FPR2,GABARAP,GRN,HCK,HIF1A,HSPA8,ICAM1,IL1B,ITGB2,KCNMA1,LAMTOR2,LDLR,MAP1LC3B,MBNL1,NFE2L2,PELI1,PFKFB3,PFN1,PLEK,PRKCE,PTEN,PYCARD,RACK1,S100A9,THBS1,TLR4,TMEM165,TNF,TYROBP,VAMP8	49
Hematological Disease,Organismal Injury and Abnormalities	Polycythemia	6.99e-19		-0.372	ADGRE5,APOE,BIRC3,CD44,CD63,CFLAR,CXCL3,CXCL8,DUSP1,FCER1G,GRN,HIF1A,IL1A,IL1B,IL1RN,IL2RA,IRAK2,ITGB2,KCNMA1,NFE2L2,NFKB1,NFKBIA,NLRP3,PDE4B,POLE4,PPP1R15A,PTGS2,RPS6,S100A9,STAT3,TET2,TNF,ZFP36	33
Protein Synthesis	Quantity of cytokine	1.29e-12		-0.357	APOE,ARHGDIB,CD14,CD36,CD44,CLIC4,DUSP1,FABP5,GPR183,IL1B,IL1RN,IRAK2,IRF1,ITGB2,LDLR,N4BP1,NFE2L2,NLRP3,PRKCE,PTGS2,PTPN1,PYCARD,S100A9,SAMSN1,STAT3,STX11,TLR4,TNF	28
Organismal Injury and Abnormalities	Wound	1.99e-10		-0.342	ADM,CCL3,CD44,CFD,CFLAR,CLIC4,EGR1,EREG,FCN1,FLT1,GRN,ICAM1,IL1A,ITGB2,KLF6,MT2A,NACA,NFE2L2,PRKCH,PTGS2,PTPN2,SDC4,SOD2,THBS1,TNF	25
Immunological Disease,Organismal Injury and Abnormalities	Immediate hypersensitivity	2.01e-15		-0.337	ACTB,ADGRE2,ALDOA,CAPG,CCL20,CD44,CD63,CFL1,CST3,CXCL8,DUSP1,EIF1,FABP5,FCER1G,FCGR2A,FPR2,HCK,IL1A,IL1B,IL1RN,IL2RA,LCP2,LGALS1,MALT1,NFKBIZ,PDE4B,PTEN,PTGS2,S100A11,S100A8,S100A9,TKT,TLR4,TNF,TNFAIP3,TPI1,ZFP36	37
Hematological System Development and Function,Lymphoid Tissue Structure and Development,Tissue Morphology	Quantity of helper T lymphocytes	1.02e-11		-0.333	APOE,FABP5,GPR132,HIF1A,ICAM1,IRAK3,IRF1,LDLR,LGALS1,MALT1,NLRP3,PIK3AP1,PTEN,PTPN2,PYCARD,STAT3,TLR4,TNF,TNIP1,ZFP36	20
Gastrointestinal Disease,Hepatic System Disease,Organismal Injury and Abnormalities	Hepatic injury	2.49e-10		-0.3	ADM,APOE,CCL4,CD14,CTSB,EGR1,IL1A,IL1RN,IRF1,ITGB2,NFE2L2,NFKB1,NLRP3,PTEN,SDC4,STAT3,TNF,TNFAIP3,TRAF1	19
Organismal Injury and Abnormalities,Renal and Urological Disease	Renal lesion	1.17e-12		-0.296	ACTB,ADM,ANPEP,APOC1,APOE,AQP9,ATP5MG,BLVRB,BTG2,CCL4,CD44,CD9,CFLAR,COX5B,COX6B1,CRYBG1,CSMD1,CXCL2,CXCL8,CYRIA,DENND5A,DUSP6,EEF1B2,EREG,ETS2,FABP5,FCER1G,FLT1,GABARAP,GABPB1,GBP2,GPR132,GPX1,GSTP1,HIF1A,HSP90AA1,IL1B,IL1RAPL1,IL1RN,IL2RA,INSR,IRAK3,IRF1,ITGB2,KCNMA1,KDM6B,KLF6,LTA4H,LUCAT1,MCTP1,MTSS1,NBPF10 (includes others),NDUFB10,NFAT5,NFE2L2,NFKB1,NFKBIA,NFKBIZ,NPL,PAG1,PDE4B,PRKCE,PRKCH,…	89
Infectious Diseases,Organismal Injury and Abnormalities	Viral Infection	2.74e-37		-0.287	ACSL1,ACTB,ADGRE5,ADM,AKAP13,ANPEP,APOC1,APOE,ARHGDIB,ARL4C,ATP1A1,ATP6V0B,ATP6V0E1,ATP6V1G1,BACH1,BIRC3,BTG2,CARD16,CCL20,CCL3,CCL3L3,CCL4,CCRL2,CD14,CD36,CD44,CD55,CD58,CD63,CD9,CFL1,CFLAR,CH25H,CLIC4,COX6A1,CST3,CTSB,CXCL2,CXCL3,CXCL8,DLGAP1,DUSP1,EGR1,EIF1,ELOB,ETS2,FCGR2A,FKBP5,FLT1,FPR1,FTL,GABARAP,GABPB1,GADD45B,GCH1,GPAT3,GPX1,HCK,HIF1A,HNRNPC,HSP90AA1,HSPA8,ICAM1,IFNGR2,IL1A,IL1B,IL1RN,I…	148
Cellular Development,Cellular Growth and Proliferation	Colony formation of cells	1.38e-11		-0.27	AREG,BCL6,CCL3,CCL3L3,CCL4,CD44,CD9,CTSB,CXCL3,CXCL8,DUSP1,DUSP6,EGR1,EIF4E,EREG,EZR,FLT1,GADD45B,GRN,HCK,HIF1A,IL1A,IL1B,IL1RN,INSR,KLF6,NFKBIA,PLK3,PPP1R15A,PTEN,PTGS2,PTPN1,RACK1,RNF144B,RPS19,S100A6,SEC62,SENP3-EIF4A1,SOD2,SRGAP1,STAT3,TET2,TNF,TNFAIP3,ZBTB16	45
Protein Synthesis	Expression of protein	9.46e-11		-0.264	ADM,BTG2,EIF1,EIF4E,HCK,IL1B,NFKB1,PPP1R15A,RACK1,RPL10A,RPL19,RPL27A,RPL30,RPL41,RPS14,RPS23,RPS3,RPS4Y1,RPS5,RPS6,RPS9,S100A9,SOD2,STAT3,THBS1,TNF,TNIP1,TP53BP2,USP36,YBX1,ZFP36	31
Cell Death and Survival,Organismal Injury and Abnormalities	Cell death of connective tissue cells	1.15e-16		-0.247	ABL2,ACTB,ADM,ATF6,BCL2A1,BCL6,BIRC3,CD36,CD44,CFLAR,CLIC4,CTSB,CXCL8,DENND4A,DUSP1,EGR1,EIF4E,FLT1,GADD45B,GNG2,GPX1,GSTP1,HIF1A,HIPK2,IL1A,IL1B,INSR,KLF6,MAP1LC3B,NFAT5,NFE2L2,NFKB1,NFKBIA,NLRP3,OAZ1,PELI1,PLK3,PMAIP1,PPP1R15A,PTEN,PTPN1,PYCARD,RANBP2,REL,S100A8,SDC4,SOD2,STAT3,THBS1,TNF,TNFAIP3,TNFAIP8,TNIP1,TRAF1	54
Cancer,Organismal Injury and Abnormalities	Intraabdominal organ tumor	9.84e-17		-0.227	ABL2,ACSL1,ACTB,ACTG1,ADGRE2,ADGRE5,ADM,AIF1,AKAP13,ALDH1A2,ALDOA,ANKRD28,ANPEP,AP2S1,APOC1,APOE,AQP9,AREG,ARHGDIB,ARL4C,ARMC9,ATF6,ATP1A1,ATP5MG,ATP6V0E1,ATP6V1F,BACH1,BAZ1A,BCL2A1,BCL6,BIRC3,BLVRB,BTBD19,BTG2,C1QB,C1QC,CAPG,CARD16,CCL20,CCL3,CCL3L3,CCL4,CCND3,CCRL2,CCSER1,CD300E,CD36,CD44,CD55,CD58,CD63,CD9,CFD,CFL1,CFLAR,CH25H,CHST11,CLIC4,COPE,COX5B,COX6A1,COX6B1,CRYBG1,CSGALNACT2,CSMD1,CST3,…	343
Cancer,Organismal Injury and Abnormalities	Advanced malignant solid tumor	8.68e-13		-0.219	ABL2,ADM,ALDH1A2,ANPEP,ARL4C,CAPG,CARD16,CD36,CD44,CD9,CRYBG1,CTSB,CXCL8,DUSP6,EIF4E,FCGR2A,FLT1,FTL,GCH1,GSTP1,HELB,HIF1A,HSP90AA1,ICAM1,IL1A,IL1B,IL1RN,IL2RA,INSR,ITGB2,KCNJ2,KCNMA1,KLF6,LGALS1,LIMK2,NFKB1,PRKCE,PTEN,PTGS2,RNF144B,RPL27,RPL7,RPS6,S100A11,S100A4,SCGB1A1,SOD2,STAT3,TET2,THBS1,TMEM176B,TMSB10/TMSB4X,TNF,TNFAIP3,TUBA1A,ZFP36	56
Cancer,Organismal Injury and Abnormalities	Metastatic solid tumor	1.34e-12		-0.219	ABL2,ADM,ANPEP,CAPG,CD36,CD44,CD9,CRYBG1,CTSB,CXCL8,DUSP6,EIF4E,FCGR2A,FLT1,FTL,GCH1,GSTP1,HELB,HIF1A,HSP90AA1,ICAM1,IL1A,IL1B,IL1RN,IL2RA,INSR,ITGB2,KCNJ2,KLF6,LGALS1,LIMK2,NFKB1,PRKCE,PTEN,PTGS2,RNF144B,RPL27,RPL7,RPS6,S100A11,S100A4,SCGB1A1,SOD2,STAT3,TET2,THBS1,TMSB10/TMSB4X,TNF,TNFAIP3,TUBA1A,ZFP36	51
Cancer,Organismal Injury and Abnormalities	Abdominal cancer	6.19e-15		-0.195	ABL2,ACSL1,ACTB,ACTG1,ADGRE2,ADGRE5,ADM,AIF1,AKAP13,ALDH1A2,ALDOA,ANKRD28,ANPEP,APOC1,APOE,AQP9,AREG,ARHGDIB,ARL4C,ARMC9,ATF6,ATP1A1,ATP5MG,ATP6V0E1,ATP6V1F,BACH1,BAZ1A,BCL6,BIRC3,BLVRB,BTBD19,BTG2,C1QB,C1QC,CAPG,CARD16,CCL20,CCL3,CCL3L3,CCL4,CCND3,CCRL2,CCSER1,CD14,CD300E,CD36,CD44,CD55,CD58,CD63,CD9,CFD,CFL1,CFLAR,CH25H,CHST11,CLIC4,COPE,COX5B,COX6A1,COX6B1,CRYBG1,CSGALNACT2,CSMD1,CST3,CSTB,CTS…	340
Cell Death and Survival	Apoptosis	3.04e-28		-0.19	ABL2,ACSL1,ADM,AIF1,ALDH1A2,ALDOA,ANPEP,APOC1,APOE,AREG,ARHGDIB,ATF6,ATP1A1,BACH1,BAZ1A,BCL2A1,BCL6,BIRC3,BTG2,CCL3,CCL3L3,CCL4,CCND3,CD14,CD36,CD44,CD55,CD9,CFL1,CFLAR,CHST11,CLIC4,COX6B1,CST3,CSTB,CTSB,CXCL2,CXCL8,CYBA,DDAH2,DUSP1,DUSP6,DYNLL1,ECE1,EEF1B2,EGR1,EHD1,EIF4E,EREG,ETS2,EZR,FCER1G,FKBP5,FLT1,FNDC3A,FPR2,GABARAP,GABPB1,GADD45B,GAS7,GNG2,GPR132,GPX1,GRN,GSTP1,HCK,HIF1A,HIPK2,HNRNPC,HSP…	170
Cell Death and Survival	Apoptosis of lung	7.83e-11		-0.183	CD36,FLT1,IL2RA,IRAK3,MAP1LC3B,NFE2L2,NFKBIA,NLRP3,PMAIP1,PTEN,SFTPC,TNF	12
Cancer,Organismal Injury and Abnormalities	Abdominal carcinoma	1.17e-12		-0.166	ABL2,ACSL1,ACTB,ACTG1,ADGRE2,ADGRE5,ADM,AIF1,AKAP13,ALDH1A2,ALDOA,ANKRD28,ANPEP,APOC1,APOE,AQP9,AREG,ARL4C,ARMC9,ATF6,ATP1A1,ATP5MG,ATP6V0E1,ATP6V1F,BACH1,BAZ1A,BCL6,BIRC3,BLVRB,BTBD19,C1QB,C1QC,CAPG,CARD16,CCL20,CCL3L3,CCL4,CCND3,CCRL2,CCSER1,CD14,CD300E,CD36,CD44,CD55,CD58,CD63,CD9,CFD,CFL1,CFLAR,CH25H,CHST11,CLIC4,COPE,COX5B,COX6A1,COX6B1,CRYBG1,CSGALNACT2,CSMD1,CST3,CSTB,CTSB,CXCL2,CXCL3,CXCL…	327
Cancer,Organismal Injury and Abnormalities	Growth of tumor	1.75e-14		-0.165	ADM,ANPEP,AREG,BACH1,BTG2,CCL3,CCND3,CCRL2,CD36,CD44,CD58,CFLAR,CST3,CTSB,CXCL3,CXCL8,CYBA,DUSP1,EGR1,EIF4E,EZR,FABP5,FCER1G,FLT1,GABPB1,GBP2,GCH1,GRN,GSTP1,HIF1A,HSP90AA1,HSPA8,ICAM1,IL1A,IL1B,IL1RN,INSR,IRF1,KLF6,KLF7,LGALS1,LITAF,MACROH2A1,MALT1,NAMPT,NFKB1,NFKBIA,NLRP3,PELI1,PFKFB3,PLK3,PRKCE,PTEN,PTGS2,PTMA,PTPN2,PYCARD,RACK1,RNF19B,RPS19,S100A6,S100A9,SCHLAP1,SENP3-EIF4A1,SERPINB9,SOD2,STAT…	77
Hematological Disease,Organismal Injury and Abnormalities	Toxemia	1.19e-13		-0.161	BIRC3,CD14,CLIC4,FCGR2A,HCK,HIF1A,HIPK2,ICAM1,IL1RN,IRAK2,NFKB1,NFKBIA,NLRP3,PDE4B,PTGS2,PYCARD,S100A9,STAT3,TLR4,TNF,TNFAIP3	21
Hematological Disease,Infectious Diseases,Organismal Injury and Abnormalities	Endotoxemia	4.47e-13		-0.161	BIRC3,CD14,CLIC4,FCGR2A,HCK,HIF1A,HIPK2,ICAM1,IL1RN,IRAK2,NFKB1,NLRP3,PDE4B,PTGS2,PYCARD,S100A9,STAT3,TLR4,TNF,TNFAIP3	20
Cancer,Organismal Injury and Abnormalities	Cancer of cells	1.62e-13		-0.153	ABL2,ACTB,ACTG1,ADGRE2,ADGRE5,AKAP13,ALDH1A2,ANPEP,APOC1,APOE,ARMC9,ATF6,ATP1A1,BACH1,BCL6,BIRC3,BTG2,C1QC,CCL20,CCL3,CCL4,CCND3,CCSER1,CD14,CD300E,CD36,CD44,CD55,CD58,CD63,CFD,CFL1,CFLAR,CRYBG1,CSGALNACT2,CSMD1,CST3,CTSB,CXCL2,CXCL3,CXCL8,CYBA,DBI,DENND4A,DLGAP1,DUSP1,DUSP6,ECE1,EEF1G,EGR1,EHD1,EIF4E,EREG,EZR,FABP5,FCGR2A,FLT1,FLVCR2,FNDC3A,FPR2,FXYD5,GADD45B,GBP2,GCH1,GK,GMFG,GPR132,GPR183,GPX1…	204
Cellular Function and Maintenance	Internalization of cells	1.39e-16		-0.14	ARPC2,CAPG,CCL3,CD14,CD36,CD44,CH25H,CLIC4,COX4I1,EIF4E,ETS2,EZR,FCER1G,FCGR2A,FCN1,FGD4,FPR1,GRN,GSTP1,HCK,HIF1A,ICAM1,IL1B,ITGB2,LAMTOR2,MBNL1,NFE2L2,PELI1,PFKFB3,PFN1,PLEK,PRKCE,PTEN,S100A9,THBS1,TLR4,TMEM165,TNF,TYROBP	39
Cancer,Organismal Injury and Abnormalities	Adenocarcinoma	3.23e-13		-0.137	ABL2,ACSL1,ACTB,ACTG1,ADGRE2,ADGRE5,ADM,AIF1,AKAP13,ALDH1A2,ALDOA,ANKRD28,ANPEP,APOC1,APOE,AQP9,AREG,ARL4C,ARMC9,ATF6,ATP1A1,ATP5MG,ATP6V1F,BACH1,BAZ1A,BCL6,BIRC3,BLVRB,BTBD19,C1QB,C1QC,CAPG,CARD16,CCL20,CCL3L3,CCL4,CCND3,CCSER1,CD14,CD300E,CD36,CD44,CD55,CD58,CD63,CD9,CFD,CFL1,CFLAR,CH25H,CHST11,CIAO2B,CLIC4,COPE,COX4I1,COX5B,COX6B1,CRYBG1,CSGALNACT2,CSMD1,CSTB,CTSB,CXCL2,CXCL3,CXCL8,CYBA,CYRIA,…	320
Organismal Injury and Abnormalities	Growth of lesion	6.55e-15		-0.129	ADM,ANPEP,APOE,AREG,BACH1,BTG2,CCL3,CCND3,CCRL2,CD36,CD44,CD58,CFLAR,CST3,CTSB,CXCL3,CXCL8,CYBA,DUSP1,EGR1,EIF4E,EZR,FABP5,FCER1G,FLT1,GABPB1,GBP2,GCH1,GRN,GSTP1,HIF1A,HSP90AA1,HSPA8,ICAM1,IL1A,IL1B,IL1RN,INSR,IRF1,KLF6,KLF7,LGALS1,LITAF,MACROH2A1,MALT1,NAMPT,NFKB1,NFKBIA,NLRP3,PELI1,PFKFB3,PLK3,PRKCE,PTEN,PTGS2,PTMA,PTPN2,PYCARD,RACK1,RNF19B,RPS19,S100A6,S100A9,SCHLAP1,SENP3-EIF4A1,SERPINB9,SOD2…	78
Embryonic Development,Organismal Development	Development of abdomen	2.98e-10		-0.128	ADM,ALDH1A2,APOE,AREG,CCL3,CCND3,CD14,CD44,CFLAR,CSMD1,CST3,EGR1,EREG,EZR,FCER1G,FLT1,FMN1,GRN,HIF1A,ICAM1,IL1A,IL1B,IL1RN,INSR,KLF6,NFE2L2,NFKB1,NFKBIA,PRKCE,PTEN,PTGS2,PTPN12,RAPGEF2,SELENOT,SESTD1,SOD2,SULF2,TET2,THBS1,TKT,TLR4,TNF,ZFX	43
Cell Death and Survival,Organismal Injury and Abnormalities	Apoptosis of phagocytes	1.34e-19		-0.126	ANPEP,APOE,BCL2A1,BCL6,BIRC3,CD14,CD44,CFLAR,CXCL2,CXCL8,FCER1G,GPR132,HIF1A,IL1B,IL1RN,IRF1,ITGB2,LAMTOR2,LDLR,MEFV,NAMPT,NFE2L2,NFKB1,NFKBIA,NLRP3,PIK3AP1,PRKCE,PTEN,S100A8,SOD2,STAT3,TLR4,TNF,TNFAIP3	34
Cell Death and Survival,Organismal Injury and Abnormalities	Cell death of immune cells	6.78e-22		-0.122	ADGRE2,ANPEP,APOE,BCL2A1,BCL6,BIRC3,CCL3,CCL4,CD14,CD44,CD9,CFLAR,CST3,CTSB,CXCL2,CXCL8,EGR1,EIF4E,ETS2,EZR,FCER1G,GADD45B,GPR132,GRN,HCK,HIF1A,ICAM1,IL1A,IL1B,IL1RN,IL2RA,INSR,IRAK3,IRF1,ITGB2,LAMTOR2,LDLR,LGALS1,MALT1,MEFV,NAMPT,NFAT5,NFE2L2,NFKB1,NFKBIA,NLRP3,PELI1,PIK3AP1,PMAIP1,PRKCE,PTEN,PYCARD,REL,RHOH,RPS6,S100A8,SERPINB9,SOD2,STAT3,THBS1,TLR4,TNF,TNFAIP3,TRAF1,TYROBP,ZBTB16,ZFP36	67
Cell Death and Survival	Cell death of liver	7.73e-12		-0.112	ABL2,ADM,APOE,BIRC3,CCL4,CD14,CFLAR,CTSB,CXCL3,GADD45B,IL1B,IL1RN,IRF1,ITGB2,LDLR,NAMPT,NFE2L2,NFKB1,NFKBIA,PTGS2,PTPN1,REL,SOD2,STAT3,TKT,TLR4,TNF,TNIP1,TYROBP	29
Cancer,Organismal Injury and Abnormalities	Abdominal adenocarcinoma	1.96e-10		-0.09	ABL2,ACSL1,ACTB,ACTG1,ADGRE2,ADGRE5,ADM,AIF1,AKAP13,ALDH1A2,ALDOA,ANKRD28,ANPEP,APOC1,APOE,AQP9,AREG,ARL4C,ARMC9,ATF6,ATP1A1,ATP5MG,ATP6V1F,BACH1,BAZ1A,BCL6,BIRC3,BLVRB,BTBD19,C1QB,C1QC,CAPG,CARD16,CCL20,CCL3L3,CCL4,CCSER1,CD14,CD300E,CD36,CD44,CD55,CD58,CD9,CFD,CFL1,CFLAR,CH25H,CHST11,CLIC4,COPE,COX5B,COX6B1,CRYBG1,CSGALNACT2,CSMD1,CSTB,CTSB,CXCL2,CXCL3,CXCL8,CYBA,CYRIA,DBI,DENND4A,DENND5A,DLGAP…	307
Cell Death and Survival,Organismal Injury and Abnormalities	Cell death of epithelial cells	3.13e-15		-0.089	BCL2A1,BCL6,BIRC3,CCL4,CD36,CD44,CFLAR,CLIC4,CTSB,CXCL3,CXCL8,DYNLL1,EGR1,EIF4E,GADD45B,GAS7,GRN,HIPK2,ICAM1,IL1B,IL1RN,IRAK3,IRF1,LDLR,MAP1LC3B,MEFV,NAMPT,NFE2L2,NFKB1,NFKBIA,NLRP3,PLK3,PMAIP1,PPP1R15A,PTEN,PTGS2,PTPN1,PTPN2,PYCARD,REL,SDHD,SFTPC,SOD2,STAT3,TLR4,TNF,TNFAIP3,TNFAIP8,TNIP1,TP53BP2,TRAF1	51
Cell Death and Survival,Organismal Injury and Abnormalities	Cell death of phagocytes	2.88e-20		-0.079	ANPEP,APOE,BCL2A1,BCL6,BIRC3,CD14,CD44,CFLAR,CTSB,CXCL2,CXCL8,FCER1G,GPR132,HIF1A,IL1B,IL1RN,IRF1,ITGB2,LAMTOR2,LDLR,MEFV,NAMPT,NFE2L2,NFKB1,NFKBIA,NLRP3,PIK3AP1,PMAIP1,PRKCE,PTEN,PYCARD,S100A8,SOD2,STAT3,TLR4,TNF,TNFAIP3,ZFP36	38
Hematological System Development and Function,Hematopoiesis,Tissue Morphology	Quantity of hematopoietic progenitor cells	3.17e-11		-0.071	AKAP13,APOE,ARHGDIB,CCND3,CD36,CD44,CD9,CXCL8,ETS2,FCER1G,HIF1A,IL1A,IRF1,ITGB2,LCP2,NFAT5,NFE2L2,NFKB1,NFKBIA,PAG1,PIK3AP1,PRKCE,PRKCH,PTEN,PTPN2,RAPGEF2,REL,RHOH,RPS19,RPS6,STAT3,TET2,THBS1,TNF,TNFAIP3,TYROBP,ZBTB16,ZFX	38
Cell-To-Cell Signaling and Interaction,Cellular Function and Maintenance,Inflammatory Response	Phagocytosis of cells	4.22e-19		-0.045	ABL2,ANPEP,ARPC2,CAPG,CCL3,CD14,CD36,CD44,CH25H,CLIC4,COX4I1,CYBA,EHD1,EIF4E,ETS2,FCER1G,FCGR2A,FCN1,FPR1,FPR2,GRN,HCK,HIF1A,HSPA8,ICAM1,IL1B,ITGB2,LAMTOR2,LDLR,MBNL1,NFE2L2,PELI1,PFKFB3,PFN1,PLEK,PRKCE,PTEN,PYCARD,RACK1,S100A9,THBS1,TLR4,TMEM165,TNF,TYROBP,VAMP8	46
Cell Death and Survival,Embryonic Development,Organismal Injury and Abnormalities	Cell death of embryonic cell lines	2.97e-11		-0.036	ABL2,BCL2A1,BCL6,BIRC3,CD44,CFLAR,CTSB,DUSP1,EGR1,GADD45B,GAS7,GSTP1,HIF1A,HIPK2,IRF1,MEFV,NAMPT,NFE2L2,NFKB1,PLK3,PMAIP1,PPP1R15A,PTEN,PTPN1,PYCARD,RANBP2,REL,SDHD,SOD2,STAT3,THBS1,TNF,TP53BP2,TRAF1	34
Cellular Assembly and Organization,Cellular Function and Maintenance	Microtubule dynamics	1.68e-13		-0.028	ABL2,ACTB,ACTG1,ADM,ALDOA,ANPEP,APOE,AREG,ARPC2,ATF6,BTG2,CAPG,CD44,CD9,CFL1,CSTB,CXCL8,DYNLL1,ECE1,EGR1,EHD1,EIF4E,EZR,FGD4,FLT1,FMN1,GABARAP,GAS7,GRN,HCK,HOOK2,HSP90AA1,ICAM1,IL1A,IL1B,IL1RAPL1,INSR,KCNJ2,KLF7,KLF9,LCP2,LDLR,LIMK2,MT2A,MTSS1,NFAT5,NFE2L2,NFKB1,NFKBIA,NLRP3,PFDN5,PFN1,PLK3,PRKCE,PRKCH,PTEN,PTGS2,RANBP2,RAPGEF2,RBFOX2,RPL4,RPS14,RPS3,RPS6,S100A11,S100A4,SDC4,SIPA1L1,SRGAP1,STAT3,…	79
Cancer,Organismal Injury and Abnormalities	Genitourinary tumor	9.44e-17		-0.026	ABL2,ACSL1,ACTB,ACTG1,ADGRE5,ADM,AIF1,AKAP13,ALDH1A2,ALDOA,ANKRD28,ANPEP,AP2S1,APOC1,APOE,AQP9,AREG,ARHGDIB,ARL4C,ARMC9,ATF6,ATP1A1,ATP5MG,ATP6V0E1,BACH1,BCL2A1,BCL6,BIRC3,BLVRB,BTBD19,BTG2,C1QC,CAPG,CARD16,CCL3,CCL4,CCND3,CCSER1,CD14,CD300E,CD36,CD44,CD55,CD58,CD9,CFLAR,CH25H,CHST11,CIAO2B,CLIC4,COPE,COX4I1,COX5B,COX6A1,COX6B1,CRYBG1,CSGALNACT2,CSMD1,CSTB,CTSB,CXCL2,CXCL3,CXCL8,CYBA,CYRIA,DENND4…	292
Hematological System Development and Function,Inflammatory Response,Tissue Morphology	Quantity of neutrophils	5.28e-13		-0.022	CCL3L3,CD36,CFLAR,CXCL2,FCGR2A,FPR1,GPR132,GRN,ICAM1,IL1A,IL1B,IL2RA,IRAK3,ITGB2,LDLR,NFKB1,NFKBIA,NLRP3,PDE4B,PRKCE,S100A8,S100A9,STAT3,STX11,THBS1,TLR4,TNF,TNFAIP3,YBX1,ZFP36	30
Cell Death and Survival,Organismal Injury and Abnormalities	Cell death of blood cells	2.01e-22		-0.007	ADGRE2,ANPEP,APOE,BCL2A1,BCL6,BIRC3,CCL3,CCL3L3,CCL4,CD14,CD44,CD9,CFLAR,CST3,CTSB,CXCL2,CXCL8,EGR1,EIF4E,ETS2,EZR,FCER1G,GADD45B,GPR132,GRN,HCK,HIF1A,HIPK2,ICAM1,IL1A,IL1B,IL1RN,IL2RA,INSR,IRAK3,IRF1,ITGB2,LAMTOR2,LDLR,LGALS1,MALT1,MEFV,NAMPT,NFAT5,NFE2L2,NFKB1,NFKBIA,NLRP3,PELI1,PFN1,PIK3AP1,PMAIP1,PRKCE,PTEN,PYCARD,REL,RHOH,RPS6,S100A8,SERPINB9,SOD2,STAT3,THBS1,TLR4,TNF,TNFAIP3,TRAF1,TYROBP,ZB…	70
Neurological Disease,Organismal Injury and Abnormalities	Movement Disorders	7.73e-11		-0.007	ACTB,APOE,ARHGDIB,ATP5MG,ATP5MJ,BACH1,BCL6,CCL4,CD44,CFLAR,COPE,COX4I1,COX5B,COX6B1,COX7C,CSMD1,CSTB,CTSB,EGR1,EZR,FCGR2A,FLVCR2,FTL,GCH1,GRN,GSTP1,HSP90AA1,HSPA8,IFNGR2,IL1A,IL1B,IL1R2,INPP5A,KCNIP4,KCNMA1,LDLR,MAFF,MALT1,MCTP1,MT-ND3,MT2A,NDUFA4,NDUFB10,NFE2L2,NFKB1,NLRP3,NPC2,PDE4B,PFN1,PLEK,PPT1,PTGS2,RAPGEF2,RASGEF1B,RPL13,RPL15,RPL3,SDC4,SDHD,SLC1A2,SLC1A3,SLC25A6,SOD2,SUB1,SYN1,TLR4,TMEM17…	75
Hematological System Development and Function,Lymphoid Tissue Structure and Development,Tissue Development	Growth of lymphoid tissue	2.86e-10		-0.004	CD44,EGR1,ETS2,IL1A,IL1B,IL1RN,IL2RA,LCP2,NFAT5,NFE2L2,NFKB1,NFKBIA,PAG1,PTEN,PTGS2,PTPN2,PYCARD,TLR4,TNF,TNFAIP3,ZBTB16	21
Cell Death and Survival,Organismal Injury and Abnormalities	Apoptosis of airway epithelial cells	9.07e-11		0	CD36,CFLAR,IRAK3,MAP1LC3B,NFE2L2,NLRP3,PMAIP1,PTEN,SFTPC,TLR4,TNF	11
Cancer,Organismal Injury and Abnormalities	Abdominal neoplasm	5.03e-18		0.01	ABL2,ACSL1,ACTB,ACTG1,ADGRE2,ADGRE5,ADM,AIF1,AKAP13,ALDH1A2,ALDOA,ANKRD28,ANPEP,AP2S1,APOC1,APOE,AQP9,AREG,ARHGDIB,ARL4C,ARMC9,ATF6,ATP1A1,ATP5MG,ATP6V0E1,ATP6V1F,BACH1,BAZ1A,BCL2A1,BCL6,BIRC3,BLVRB,BTBD19,BTG2,C1QB,C1QC,CAPG,CARD16,CCL20,CCL3,CCL3L3,CCL4,CCND3,CCRL2,CCSER1,CD14,CD300E,CD36,CD44,CD55,CD58,CD63,CD9,CFD,CFL1,CFLAR,CH25H,CHST11,CLIC4,COPE,COX5B,COX6A1,COX6B1,CRYBG1,CSGALNACT2,CSMD1,…	349
Cell Death and Survival,Organismal Injury and Abnormalities	Cell death of colorectal cancer cell lines	1.04e-10		0.032	CD14,CD44,CFLAR,CYBA,EGR1,EZR,FLT1,GSTP1,HIPK2,HNRNPC,IL1A,IL1B,LUCAT1,MTSS1,NFE2L2,NFKBIA,PDE4B,PELI1,PLK3,PMAIP1,PPP1R15A,PTEN,PTGS2,PTPN2,PYCARD,SOD2,TLR4,TMSB10/TMSB4X,TNF,TP53BP2,USP36	31
Embryonic Development,Organismal Development	Development of body trunk	5.94e-12		0.042	ACTG1,ADM,AKAP13,ALDH1A2,ANPEP,APOE,AREG,CCL3,CCL3L3,CCND3,CD14,CD44,CD9,CFLAR,CSMD1,CST3,CXCL3,DUSP1,DUSP6,ECE1,EGR1,EIF4E,EREG,EZR,FAM20A,FCER1G,FLT1,FMN1,GRN,HIF1A,ICAM1,IL1A,IL1B,IL1RN,INSR,IRF1,KDM6B,KLF6,KLF7,LCP2,NACA,NFAT5,NFE2L2,NFKB1,NFKBIA,NPC2,PKP2,PRKCE,PTEN,PTGS2,PTPN12,PTPN2,RAPGEF2,REL,SAV1,SCGB3A1,SELENOT,SESTD1,SFTPC,SLC27A4,SOD2,STAT3,STXBP2,SULF2,TET2,THBS1,TKT,TLR4,TNF,TP53BP…	73
Cellular Function and Maintenance	Endocytosis by eukaryotic cells	2.25e-18		0.058	ACSL1,APOE,ARPC2,ATP6V0E1,ATP6V1F,BTBD19,CAPG,CCL3,CCL4,CD14,CD36,CD44,CH25H,CLIC4,COX4I1,EGR1,EHD1,EIF4E,ETS2,FCER1G,FCGR2A,FCN1,FPR1,GRN,HCK,HIF1A,HSP90AA1,ICAM1,IL1B,ITGB2,LAMTOR2,MBNL1,NFE2L2,PELI1,PFKFB3,PFN1,PLEK,PRKCE,PTEN,RACK1,S100A9,THBS1,TLR4,TMEM165,TNF,TYROBP,VAMP8	47
Gastrointestinal Disease,Hepatic System Disease,Organismal Injury and Abnormalities	Liver Damage	1.42e-15		0.061	ADM,APOE,AREG,CCL4,CD14,CD44,CTSB,DUSP1,EGR1,FLT1,GSTP1,HCK,IL1A,IL1B,IL1RN,IRF1,ITGB2,KCNIP4,NFE2L2,NFKB1,NLRP3,PTEN,PTGS2,PTPN1,PYCARD,SDC4,STAT3,TLR4,TNF,TNFAIP3,TRAF1	31
Cellular Function and Maintenance	Engulfment of blood cells	3.43e-15		0.062	APOE,ARPC2,CAPG,CCL3,CD14,CD36,CD44,CH25H,CLIC4,EIF4E,FCER1G,FCGR2A,FCN1,FPR1,GRN,GSTP1,HCK,HIF1A,ICAM1,IL1A,IL1B,ITGB2,LAMTOR2,MBNL1,NFE2L2,PFKFB3,PLEK,PTEN,S100A9,THBS1,TLR4,TMEM165,TNF,TYROBP	34
Cancer,Organismal Injury and Abnormalities	Advanced malignant tumor	1.53e-20		0.064	ABL2,ACTB,ADGRE5,ADM,ALDH1A2,ANPEP,APOC1,APOE,ARL4C,BACH1,CAPG,CARD16,CD36,CD44,CD9,CFLAR,CRYBG1,CST3,CSTB,CTSB,CXCL2,CXCL3,CXCL8,CYBA,DUSP6,EIF4E,EZR,FABP5,FCGR2A,FLT1,FTL,GAS7,GCH1,GPR132,GSTP1,HCK,HELB,HIF1A,HSP90AA1,ICAM1,IL1A,IL1B,IL1RN,IL2RA,INSR,IRF1,ITGB2,KCNJ2,KCNMA1,KDM6B,KLF6,KLF7,KLF9,LGALS1,LIMK2,MALT1,MAP4K3,NACA,NFKB1,NFKBIA,OXSR1,POLE4,PRKCE,PTEN,PTGS2,RACK1,RNF144B,RNF19B,RPL27,R…	91
Cancer,Organismal Injury and Abnormalities	Metastasis	1.76e-18		0.064	ABL2,ACTB,ADGRE5,ADM,ANPEP,APOC1,APOE,BACH1,CAPG,CD36,CD44,CD9,CFLAR,CRYBG1,CST3,CSTB,CTSB,CXCL2,CXCL3,CXCL8,CYBA,DUSP6,EIF4E,EZR,FABP5,FCGR2A,FLT1,FTL,GAS7,GCH1,GPR132,GSTP1,HELB,HIF1A,HSP90AA1,ICAM1,IL1A,IL1B,IL1RN,IL2RA,INSR,IRF1,ITGB2,KCNJ2,KDM6B,KLF6,KLF7,KLF9,LGALS1,LIMK2,MALT1,MAP4K3,NACA,NFKB1,NFKBIA,OXSR1,PRKCE,PTEN,PTGS2,RACK1,RNF144B,RNF19B,RPL27,RPL3,RPL7,RPS6,S100A11,S100A4,SCGB1A1,S…	83
Hematological Disease,Immunological Disease,Organismal Injury and Abnormalities	Leukocytosis	7.94e-16		0.081	ADGRE5,BIRC3,CD63,CFLAR,CXCL3,CXCL8,DUSP1,FCER1G,GRN,IL1A,IL1B,IL1RN,IL2RA,ITGB2,KCNMA1,NFKB1,NFKBIA,NLRP3,POLE4,S100A9,STAT3,TET2,TNF	23
Cancer,Organismal Injury and Abnormalities,Respiratory Disease	Advanced lung cancer	1.05e-10		0.09	ADM,ANPEP,CD44,CTSB,EIF4E,FLT1,FTL,GSTP1,HIF1A,HSP90AA1,IL1B,INSR,KCNMA1,KLF6,LGALS1,NFKB1,PTEN,PTGS2,RPL27,RPL7,RPS6,SCGB1A1,SOD2,STAT3,TMSB10/TMSB4X,TNF,TUBA1A	27
Cell-To-Cell Signaling and Interaction,Cellular Function and Maintenance,Inflammatory Response	Phagocytosis of blood cells	3.27e-14		0.096	ARPC2,CAPG,CCL3,CD14,CD36,CD44,CH25H,CLIC4,EIF4E,FCER1G,FCGR2A,FCN1,FPR1,GRN,HCK,HIF1A,ICAM1,IL1B,ITGB2,LAMTOR2,MBNL1,NFE2L2,PFKFB3,PLEK,PTEN,S100A9,THBS1,TLR4,TMEM165,TNF,TYROBP	31
Cell-To-Cell Signaling and Interaction,Inflammatory Response	Immune response of tumor cell lines	1.74e-11		0.096	ARPC2,CD44,COX4I1,CTSB,ETS2,FCER1G,FCGR2A,FCN1,HCK,ICAM1,IL1B,IRF1,ITGB2,LAMTOR2,MBNL1,PELI1,PFN1,PLEK,PRKCE,PTEN,STAT3,TLR4,TMEM165,TNF,TYROBP	25
Cell Death and Survival,Organismal Injury and Abnormalities	Apoptosis of sarcoma cell lines	5.71e-11		0.102	BCL2A1,BCL6,BIRC3,CFLAR,CTSB,DUSP6,HCK,HIF1A,IL1B,IRF1,NFKBIA,PMAIP1,PTPN2,PYCARD,RACK1,REL,S100A11,SIPA1L1,SOD2,TNF,TP53BP2,TRAF1,YBX1	23
Cell Death and Survival,Gastrointestinal Disease,Hepatic System Disease,Organismal Injury and Abnormalities	Cell death of liver cells	3.78e-10		0.112	ADM,APOE,BIRC3,CCL4,CFLAR,CTSB,CXCL3,GADD45B,IL1B,IL1RN,IRF1,ITGB2,LDLR,NFE2L2,NFKB1,NFKBIA,PTGS2,PTPN1,REL,SOD2,STAT3,TLR4,TNF,TNIP1	24
Cellular Movement	Cellular infiltration by blood cells	1.59e-24		0.113	ADM,APOE,AREG,CCL3,CCL3L3,CCL4,CD14,CD36,CD44,CD55,CFD,CTSB,CXCL2,CXCL3,CXCL8,DUSP1,EZR,FCER1G,FCN1,FLT1,FPR1,FPR2,GPR132,HCK,HIF1A,ICAM1,IL1A,IL1B,IL1RN,IL2RA,ITGB2,KDM6B,LDLR,LGALS1,MALT1,MAP4K3,NFE2L2,NFKB1,NFKBIA,NFKBIZ,NLRP3,PELI1,PPP1R15A,PTEN,PTGS2,PTMA,PTPN1,S100A4,S100A8,S100A9,SCGB1A1,SFTPC,STAT3,TET2,THBS1,TLR4,TNF,TNFAIP3,TNFAIP8,TNIP1,YBX1	61
Infectious Diseases,Organismal Injury and Abnormalities	Infection by RNA virus	2.18e-26		0.151	ACSL1,ACTB,ADGRE5,ADM,AKAP13,ANPEP,APOE,ARL4C,ATP1A1,ATP6V0B,BTG2,CARD16,CCL20,CCL3,CCL3L3,CCL4,CCRL2,CD14,CD36,CD44,CD55,CD9,CFL1,CTSB,CXCL2,CXCL8,DLGAP1,DUSP1,EGR1,EIF1,ETS2,FCGR2A,FKBP5,FLT1,FPR1,GABARAP,GABPB1,GADD45B,GCH1,GPX1,HIF1A,HSPA8,ICAM1,IFNGR2,IL1A,IL1B,IL1RN,IL2RA,INSR,IRF1,ISG20,ITGB2,KCNJ2,KLF6,LCP2,LGALS1,LIMK2,MT2A,NAMPT,NFKB1,PDE4B,PELI1,PFN1,PLEK,PMAIP1,PNRC1,PPP1R15A,PRKCH,PS…	98
Cancer,Organismal Injury and Abnormalities	Invasive tumor	1.32e-16		0.169	ABL2,ACTB,ADGRE5,ADM,AKAP13,ANPEP,APOC1,APOE,BACH1,CAPG,CCND3,CD36,CD44,CD9,CFLAR,CRYBG1,CST3,CSTB,CTSB,CXCL2,CXCL3,CXCL8,CYBA,DUSP6,EGR1,EIF4E,EZR,FABP5,FCGR2A,FLT1,FNDC3A,FTL,GADD45B,GAS7,GBP2,GCH1,GPR132,GSTP1,HELB,HIF1A,HSP90AA1,ICAM1,IL1A,IL1B,IL1RN,IL2RA,INSR,IRF1,ITGB2,KCNJ2,KDM6B,KLF6,KLF7,KLF9,LGALS1,LIMK2,MALT1,MAP4K3,NACA,NBPF10 (includes others),NFKB1,NFKBIA,NFKBIZ,OXSR1,PRKCE,PTEN,PT…	93
Cell Death and Survival,Embryonic Development,Organismal Injury and Abnormalities	Apoptosis of embryonic cell lines	2.45e-10		0.171	ABL2,BCL2A1,BCL6,BIRC3,CD44,CFLAR,DUSP1,EGR1,GAS7,HIF1A,HIPK2,IRF1,MEFV,NFE2L2,PLK3,PMAIP1,PPP1R15A,PTEN,PTPN1,PYCARD,REL,SDHD,STAT3,THBS1,TNF,TP53BP2,TRAF1	27
Infectious Diseases,Organismal Injury and Abnormalities	Sepsis	1.23e-18		0.175	ADM,APOC1,APOE,BIRC3,CCL3L3,CD14,CD36,CD55,CLIC4,CXCL8,FCGR2A,HCK,HIF1A,HIPK2,ICAM1,IFNGR2,IL1A,IL1B,IL1R2,IL1RN,INSR,IRAK2,ITGB2,KCNJ2,NFKB1,NFKBIA,NLRP3,PDE4B,PTGS2,PYCARD,S100A9,STAT3,TLR4,TNF,TNFAIP3,TSPO,YBX1	37
Cell-To-Cell Signaling and Interaction,Inflammatory Response	Immune response of antigen presenting cells	3.51e-13		0.186	ATP1A1,CAPG,CCL3,CD14,CD36,CD44,CH25H,CLIC4,CST3,EIF4E,FCER1G,FCGR2A,FCN1,GRN,HCK,HIF1A,HSP90AA1,IL1B,ITGB2,NFE2L2,PFKFB3,PTEN,S100A9,SERPINB9,THBS1,TLR4,TNF,TYROBP	28
Cancer,Organismal Injury and Abnormalities,Reproductive System Disease	Mammary tumor	1.54e-11		0.197	ABL2,AKAP13,ALDOA,ANPEP,APOE,AREG,ARHGDIB,ARL4C,ATP1A1,BCL2A1,BCL6,BTG2,CCL3,CCL4,CCND3,CCSER1,CD14,CD44,CD9,CFLAR,CHST11,CIAO2B,COX4I1,COX6B1,CSMD1,CSTB,CTSB,CXCL2,CXCL3,CXCL8,CYBA,DUSP1,ECE1,EGR1,EIF1,EIF4E,ENSA,ETS2,EZR,FABP5,FKBP5,FLT1,FMN1,FNDC3A,GADD45B,GAS7,GBP2,GCH1,GPR132,GPR183,GSTP1,HCK,HELB,HIF1A,HIPK2,HSP90AA1,ICAM1,IL1A,IL1B,IL1R2,IL1RAPL1,IL2RA,INSR,IRAK2,IRF1,KCNMA1,KDM6B,KLF6,LGA…	140
Protein Synthesis	Production of protein	6.18e-11		0.209	AKAP13,APOE,BCL6,CD36,CH25H,FCER1G,FPR2,IL2RA,IRAK3,IRF1,ITGB2,LDLR,MALT1,NFAT5,NFKB1,NFKBIA,NFKBIZ,PIK3AP1,PRKCE,PTGS2,PYCARD,REL,SAMSN1,SCGB1A1,STAT3,THBS1,TLR4,TNF,TYROBP	29
Immunological Disease,Organismal Injury and Abnormalities	Systemic autoimmune syndrome	9.81e-34		0.214	ACSL1,ADGRE5,ADM,AIF1,AKAP13,ALDOA,APOE,AQP9,AREG,ARHGDIB,ARL4C,ATP1A1,BCL6,CAPG,CCL20,CCL3,CCL3L3,CCL4,CCND3,CCRL2,CD14,CD36,CD44,CD9,CFD,CFLAR,CST3,CTSB,CXCL2,CXCL3,CXCL8,DUSP1,DYNLL1,EEF1G,EGR1,EIF1,FABP5,FCER1G,FCGR2A,FCN1,FKBP5,FLT1,FPR2,FXYD5,GADD45B,GBP2,GPR183,GRN,HCK,HIF1A,HLA-DQA2,HSPA8,ICAM1,IFNGR2,IL1A,IL1B,IL1R2,IL1RN,IL2RA,INSR,IRAK3,ISG20,ITGB2,LGALS1,MEFV,MT2A,NACA,NAMPT,NDUFB10,N…	118
Cardiovascular Disease,Organismal Injury and Abnormalities	Peripheral vascular disease	5.34e-13		0.216	ADGRE5,APOE,ARHGDIB,ARL4C,ATF6,ATP1A1,BCL6,BTG2,CAPG,CD36,COX7C,CST3,CTSB,CXCL3,EEF1B2,ETS2,FCGR2A,FLT1,FPR1,GPX1,GRN,HCK,HIF1A,INPP5A,INSR,LDLR,NFKB1,NPL,PDE4B,PRKCH,PTGS2,S100A9,SAMSN1,SLC1A2,SUB1,THBS1,TLR4,TMEM176B,TNF,TP53BP2,TSPO,TUBA1A,ZFYVE16	43
Cardiovascular Disease,Organismal Injury and Abnormalities	Atherosclerotic lesion	2.68e-11		0.219	AKAP13,APOE,CCL3L3,CD36,CD44,CST3,CXCL2,EGR1,FLT1,GPX1,HIF1A,ICAM1,IL1B,LDLR,NFE2L2,NFKB1,NFKBIA,PFN1,SDC4,THBS1,TLR4,TNFAIP3,ZFP36	23
Organismal Injury and Abnormalities	Sclerotic lesion	5.21e-11		0.219	AKAP13,APOE,CCL3L3,CD36,CD44,CST3,CXCL2,EGR1,FLT1,GPX1,HIF1A,ICAM1,IL1B,LDLR,NFE2L2,NFKB1,NFKBIA,PFN1,SDC4,THBS1,TLR4,TNFAIP3,TUBA1A,ZFP36	24
Cellular Movement,Hematological System Development and Function,Immune Cell Trafficking	Cellular infiltration by leukocytes	5.99e-24		0.25	ADM,APOE,AREG,CCL3,CCL3L3,CCL4,CD14,CD36,CD44,CD55,CFD,CTSB,CXCL2,CXCL3,CXCL8,DUSP1,EZR,FCER1G,FCN1,FLT1,FPR1,FPR2,GPR132,HCK,HIF1A,ICAM1,IL1A,IL1B,IL1RN,IL2RA,ITGB2,KDM6B,LDLR,LGALS1,MALT1,MAP4K3,NFE2L2,NFKB1,NFKBIA,NFKBIZ,NLRP3,PELI1,PPP1R15A,PTEN,PTGS2,PTMA,PTPN1,S100A4,S100A8,S100A9,SCGB1A1,SFTPC,STAT3,THBS1,TLR4,TNF,TNFAIP3,TNFAIP8,TNIP1,YBX1	60
Hematological System Development and Function,Lymphoid Tissue Structure and Development,Organ Development,Tissue Development	Growth of lymphoid organ	3.4e-10		0.252	CD44,EGR1,ETS2,IL1A,IL1B,IL1RN,LCP2,NFAT5,NFE2L2,NFKB1,NFKBIA,PAG1,PTEN,PTGS2,PTPN2,PYCARD,TLR4,TNF,TNFAIP3,ZBTB16	20
Cardiovascular System Development and Function	Development of vasculature	1.05e-12		0.257	ABL2,ACTG1,ADM,AIF1,ALDH1A2,ANPEP,APOE,AREG,BACH1,CD36,CD44,CD63,CD9,CLIC4,CST3,CTSB,CXCL2,CXCL8,CYBA,ECE1,EDF1,EGR1,EREG,FLT1,FPR2,GPX1,GRN,HCK,HIF1A,HIPK2,HSP90AA1,ICAM1,IL1A,IL1B,IL1RN,INSR,IRF1,ITGB2,KCNJ2,KCNMA1,KDM6B,KLF6,KLF7,LDLR,LGALS1,NFAT5,NFE2L2,NFKBIA,NPC2,PFKFB3,PRKCE,PTEN,PTGS2,PTPN1,PTPN12,RAPGEF2,RIN2,RPL29,S100A4,S100A8,S100A9,SAV1,SCGB3A1,SDC4,SFTPC,STAT3,STXBP2,SULF2,THBS1,TKT…	74
Cellular Movement	Cellular infiltration	7.74e-27		0.264	ACTB,ADM,ALDOA,APOE,AREG,CCL3,CCL3L3,CCL4,CD14,CD36,CD44,CD55,CFD,CTSB,CXCL2,CXCL3,CXCL8,DUSP1,EZR,FCER1G,FCN1,FLT1,FPR1,FPR2,GPR132,HCK,HIF1A,ICAM1,IL1A,IL1B,IL1RN,IL2RA,ITGB2,KDM6B,LCP2,LDLR,LGALS1,MALT1,MAP4K3,NFE2L2,NFKB1,NFKBIA,NFKBIZ,NLRP3,PELI1,PPP1R15A,PTEN,PTGS2,PTMA,PTPN1,S100A4,S100A8,S100A9,SCGB1A1,SFTPC,SGMS2,STAT3,TET2,THBS1,TKT,TLR4,TNF,TNFAIP3,TNFAIP8,TNIP1,TPI1,YBX1	67
Cancer,Organismal Injury and Abnormalities	Carcinoma	1.42e-21		0.264	ABL2,ACSL1,ACTB,ACTG1,ADGRE2,ADGRE5,ADM,AIF1,AKAP13,ALDH1A2,ALDOA,ANKRD28,ANPEP,AP2S1,APOC1,APOE,APOO,AQP9,AREG,ARHGDIB,ARL4C,ARMC9,ARPC2,ATF6,ATP1A1,ATP5MG,ATP6V0B,ATP6V0E1,ATP6V1F,AVPI1,BACH1,BAZ1A,BCL2A1,BCL6,BIRC3,BLVRB,BTBD19,BTG2,C1QB,C1QC,CAPG,CARD16,CCL20,CCL3L3,CCL4,CCND3,CCRL2,CCSER1,CD14,CD300E,CD36,CD44,CD55,CD58,CD63,CD9,CFD,CFL1,CFLAR,CH25H,CHST11,CIAO2B,CLIC4,COPE,COX4I1,COX5B,COX6…	363
Hematological Disease,Immunological Disease,Organismal Injury and Abnormalities	Neutrophilia	2.65e-10		0.265	CFLAR,CXCL3,CXCL8,DUSP1,IL1A,IL1B,IL1RN,ITGB2,NLRP3,S100A9,STAT3,TNF	12
Cardiovascular System Development and Function,Organismal Development	Angiogenesis	1.13e-11		0.271	ACTG1,ADM,AIF1,ALDH1A2,ANPEP,APOE,AREG,CD36,CD44,CD63,CD9,CLIC4,CST3,CTSB,CXCL2,CXCL8,CYBA,ECE1,EDF1,EGR1,EREG,FLT1,FPR2,GPX1,GRN,HCK,HIF1A,HIPK2,HSP90AA1,ICAM1,IL1A,IL1B,IL1RN,INSR,IRF1,ITGB2,KCNJ2,KCNMA1,KDM6B,KLF6,KLF7,LDLR,LGALS1,NFAT5,NFE2L2,NFKBIA,PFKFB3,PRKCE,PTEN,PTGS2,PTPN1,RAPGEF2,RIN2,RPL29,S100A4,S100A8,S100A9,SCGB3A1,SDC4,STAT3,STXBP2,SULF2,THBS1,TKT,TLR4,TNF,TNFAIP3	67
Cellular Movement,Hematological System Development and Function,Immune Cell Trafficking	Cell movement of leukocytes	1.67e-32		0.274	ACTB,ADGRE2,ADM,AIF1,APOE,AQP9,AREG,BCL6,CAPG,CCL20,CCL3,CCL3L3,CCL4,CCRL2,CD14,CD36,CD44,CD55,CD58,CD63,CD9,CFD,CH25H,CST3,CTSB,CXCL2,CXCL3,CXCL8,DUSP1,EIF4E,EZR,FABP5,FCER1G,FCGR2A,FCN1,FLT1,FPR1,FPR2,GPR132,GPR183,GRN,HCK,HIF1A,HSP90AA1,ICAM1,IL1A,IL1B,IL1RN,IL2RA,INSR,ITGB2,KDM6B,KLF6,LCP2,LDLR,LGALS1,LITAF,MALT1,MAP4K3,NFE2L2,NFKB1,NFKBIA,NFKBIZ,NLRP3,PDE4B,PELI1,PFN1,PPP1R15A,PTEN,PTGS2,PTM…	95
Cellular Movement,Hematological System Development and Function,Immune Cell Trafficking,Inflammatory Response	Cellular infiltration by macrophages	7.83e-15		0.281	APOE,AREG,CCL4,CD14,CD44,CD55,CFD,FCN1,FLT1,HIF1A,ICAM1,IL1A,IL1B,IL1RN,ITGB2,KDM6B,LDLR,LGALS1,NFE2L2,NFKBIZ,NLRP3,PPP1R15A,PTEN,PTGS2,PTMA,PTPN1,STAT3,TNF,TNFAIP3,YBX1	30
Cell Death and Survival,Organismal Injury and Abnormalities,Renal and Urological Disease	Apoptosis of kidney cell lines	1.37e-10		0.287	ATF6,BCL2A1,BCL6,BIRC3,CD44,CFLAR,EZR,GAS7,GNG2,HIPK2,IRF1,MEFV,NFE2L2,NFKBIA,NLRP3,PMAIP1,PPP1R15A,PYCARD,SDHD,SELENOT,SOD2,STAT3,TNF,TP53BP2,TRAF1	25
Cell Death and Survival,Organismal Injury and Abnormalities	Cell death of antigen presenting cells	4.34e-16		0.292	APOE,BCL6,BIRC3,CD14,CFLAR,CTSB,GPR132,HIF1A,IL1B,IRF1,LAMTOR2,LDLR,MEFV,NAMPT,NFE2L2,NFKB1,NFKBIA,NLRP3,PIK3AP1,PMAIP1,PRKCE,PTEN,PYCARD,SOD2,STAT3,TLR4,TNF,TNFAIP3,ZFP36	29
Cellular Movement	Migration of tumor cell lines	1.02e-13		0.297	ADGRE2,ADGRE5,AIF1,ALDOA,ANKRD28,ANPEP,APOC1,AREG,ARHGDIB,ARL4C,ARPC2,CCL20,CCL3,CCL4,CD36,CD44,CD9,CST3,CTSB,CXCL2,CXCL8,DLGAP1,DUSP6,EGR1,EIF4E,EREG,EZR,FGD4,GBP2,GMFG,GRN,HIF1A,HSP90AA1,IL1A,IL1B,KDM6B,KLF6,KLF9,LGALS1,LIMK2,LUCAT1,MALT1,MAP1LC3B,MBNL1,MTSS1,NFE2L2,NFKB1,NFKBIA,PAG1,PTEN,PTGS2,PTPN1,PTPN12,RACK1,RANBP2,RNF144B,S100A11,S100A4,S100A8,S100A9,SCGB3A1,SDC4,SENP3-EIF4A1,SIPA1L1,SOD2…	72
Protein Synthesis	Quantity of interleukin	5.49e-13		0.302	APOE,ARHGDIB,CD14,CD44,CLIC4,DUSP1,IL1B,IL1RN,IRAK2,IRF1,ITGB2,LDLR,N4BP1,NFE2L2,NLRP3,PRKCE,PYCARD,STAT3,STX11,TLR4,TNF	21
Gene Expression	Expression of mRNA	1.01e-11		0.302	BCL6,BTG2,EGR1,EIF1,EIF4E,EREG,IL1B,IRF1,LDLR,NFKBIA,PFN1,RACK1,RPL10A,RPL19,RPL27A,RPL30,RPL41,RPS14,RPS23,RPS3,RPS4Y1,RPS5,RPS9,S100A9,TNF,TNIP1	26
Humoral Immune Response,Protein Synthesis	Quantity of immunoglobulin	7.85e-11		0.308	AKAP13,APOE,BCL6,CD36,CH25H,FCER1G,FPR2,IL2RA,IRAK3,IRF1,ITGB2,LDLR,MALT1,NFAT5,NFKB1,NFKBIA,NFKBIZ,PIK3AP1,PTGS2,PYCARD,REL,SAMSN1,SCGB1A1,THBS1,TLR4,TNF,TYROBP	27
Cell Death and Survival,Organismal Injury and Abnormalities	Cell death of macrophages	2.24e-16		0.327	APOE,BIRC3,CD14,CFLAR,CTSB,GPR132,HIF1A,IL1B,IRF1,LDLR,MEFV,NAMPT,NFE2L2,NFKBIA,NLRP3,PIK3AP1,PMAIP1,PRKCE,PTEN,PYCARD,SOD2,STAT3,TLR4,TNF,TNFAIP3,ZFP36	26
Cancer,Cellular Movement,Organismal Injury and Abnormalities,Tumor Morphology	Invasion of tumor cells	1.67e-10		0.337	ADGRE5,AREG,CD14,CD44,CTSB,CXCL2,EZR,HIF1A,ICAM1,LGALS1,LIMK2,NFE2L2,PTEN,PTGS2,REL,S100A8,S100A9,SCGB1A1,STAT3,THBS1,ZBTB16	21
Molecular Transport	Transport of molecule	3.21e-10		0.35	ACSL1,ADM,AKAP13,APOC1,APOE,AQP9,ATP1A1,ATP5MG,ATP6V0B,ATP6V0E1,ATP6V1G1,CCL3,CD14,CD36,CD44,CFD,CFL1,CLIC4,CXCL2,CXCL3,CXCL8,EEPD1,EGR1,EHD1,EIF4E,ELL2,EZR,FABP5,FCER1G,FCGR2A,FLT1,FPR1,FPR2,FTL,GABARAP,GCH1,GRN,GSTP1,HIF1A,HOOK2,HSP90AA1,HSPA8,IL1A,IL1B,IL1RN,INSR,IRF1,KCNJ2,KCNMA1,LDLR,LGALS1,MAFF,MT2A,NFE2L2,NFKBIA,NPC2,PFKFB3,PPT1,PRKCE,PTEN,PTGS2,PTPN1,PYCARD,RANBP2,S100A8,S100A9,SGMS2,SLC1…	87
Cell-To-Cell Signaling and Interaction,Cellular Function and Maintenance,Hematological System Development and Function,Inflammatory Response	Phagocytosis by macrophages	2.34e-13		0.357	CAPG,CCL3,CD14,CD36,CD44,CH25H,CLIC4,EIF4E,FCER1G,FCGR2A,FCN1,GRN,HCK,HIF1A,IL1B,ITGB2,NFE2L2,PFKFB3,PTEN,S100A9,THBS1,TLR4,TNF,TYROBP	24
Cell-To-Cell Signaling and Interaction	Response of antigen presenting cells	8.58e-14		0.398	ATP1A1,CAPG,CCL3,CD14,CD36,CD44,CH25H,CLIC4,CST3,EIF4E,FCER1G,FCGR2A,FCN1,GRN,HCK,HIF1A,HSP90AA1,IL1B,ITGB2,NFE2L2,PFKFB3,PRKCE,PTEN,S100A9,SERPINB9,STAT3,THBS1,TLR4,TNF,TYROBP	30
Cellular Movement	Cell movement of blood cells	7.74e-33		0.399	ACTB,ADGRE2,ADGRE5,ADM,AIF1,APOE,AQP9,AREG,BCL6,CAPG,CCL20,CCL3,CCL3L3,CCL4,CCRL2,CD14,CD36,CD44,CD55,CD58,CD63,CD9,CFD,CH25H,CST3,CTSB,CXCL2,CXCL3,CXCL8,DUSP1,EGR1,EIF4E,EZR,FABP5,FCER1G,FCGR2A,FCN1,FLT1,FPR1,FPR2,GPR132,GPR183,GRN,HCK,HIF1A,HSP90AA1,ICAM1,IL1A,IL1B,IL1RN,IL2RA,INSR,ITGB2,KDM6B,KLF6,LAMTOR2,LCP2,LDLR,LGALS1,LITAF,MALT1,MAP4K3,NFE2L2,NFKB1,NFKBIA,NFKBIZ,NLRP3,PDE4B,PELI1,PFN1,PPP…	101
Organismal Injury and Abnormalities,Respiratory Disease	Lung injury	4e-13		0.399	ADM,ATF6,ATP1A1,CCL3,CCL3L3,CD14,CXCL8,DDAH2,EGR1,FCGR2A,FLT1,HIF1A,ICAM1,IL1A,IL1B,ITGB2,MAP1LC3B,NAMPT,NFE2L2,NLRP3,PFKFB3,PTGS2,S100A8,SLC44A2,STAT3,TLR4,TNF,TNFAIP6,TSPO	29
Cellular Function and Maintenance	Engulfment of antigen presenting cells	1.8e-12		0.414	CAPG,CCL3,CD14,CD36,CD44,CH25H,CLIC4,EIF4E,FCER1G,FCGR2A,FCN1,GRN,GSTP1,HCK,HIF1A,IL1B,ITGB2,NFE2L2,PFKFB3,PTEN,S100A9,THBS1,TLR4,TNF,TYROBP	25
Cell Death and Survival,Organismal Injury and Abnormalities,Renal and Urological Disease	Cell death of kidney cell lines	3.12e-10		0.426	ATF6,BCL2A1,BCL6,BIRC3,CD44,CFLAR,EZR,FLT1,GAS7,GNG2,GSTP1,HIPK2,IRF1,MEFV,NAMPT,NFE2L2,NFKB1,NFKBIA,NLRP3,PMAIP1,PPP1R15A,PYCARD,SDHD,SELENOT,SOD2,STAT3,TNF,TP53BP2,TRAF1	29
Organismal Injury and Abnormalities	Pulmonary fibrosis or aplastic anemia	6.57e-12		0.443	ATF6,CD36,CD44,CD55,CFLAR,EGR1,FCGR2A,FLT1,GPX1,HCK,HIF1A,ICAM1,IFNGR2,IL1B,IL1RN,MAP1LC3B,NFKB1,NFKBIA,PFKFB3,PTEN,PTGS2,RPL11,RPL15,RPL18,RPL27,RPL35A,RPS19,RPS20,RPS26,SCGB1A1,SFTPC,STAT3,TNF	33
Immunological Disease,Organismal Injury and Abnormalities	Hypersensitive reaction	3.25e-20		0.448	ACTB,ADGRE2,ALDOA,APOE,CAPG,CCL20,CCL3L3,CCL4,CCRL2,CD44,CD63,CFL1,CST3,CXCL8,DUSP1,EIF1,FABP5,FCER1G,FCGR2A,FPR2,H2AZ1,HCK,ICAM1,IFNGR2,IL1A,IL1B,IL1RN,IL2RA,ITGB2,LCP2,LGALS1,LTA4H,MALT1,NFKBIA,NFKBIZ,NLRP3,PDE4B,PTEN,PTGS2,PYCARD,S100A11,S100A8,S100A9,SOD2,STXBP2,TKT,TLR4,TNF,TNFAIP3,TPI1,ZFP36	51
Endocrine System Disorders,Metabolic Disease,Organismal Injury and Abnormalities	Insulin resistance	1.18e-15		0.465	ACSL1,ADM,APOC1,APOE,ATP1A1,ATP5MJ,CD36,CD55,CFD,COX7C,CXCL8,EGR1,ETS2,FKBP5,GRN,IL1A,IL1B,INSR,IRAK2,LDLR,NDUFA4,NFKBIA,NLRP3,PFDN5,PFKFB3,PRKCE,PTEN,PTGS2,PTPN1,PYCARD,RPL41,RPL7,S100A8,SOD2,STAT3,SUB1,THBS1,TLR4,TNF,TPST1	40
Cellular Movement,Hematological System Development and Function,Immune Cell Trafficking	Cell movement of antigen presenting cells	3.81e-25		0.481	APOE,AREG,BCL6,CCL20,CCL3,CCL3L3,CCL4,CCRL2,CD14,CD44,CD55,CD58,CFD,CXCL3,CXCL8,EIF4E,FCN1,FLT1,FPR1,FPR2,GPR183,HCK,HIF1A,ICAM1,IL1A,IL1B,IL1RN,ITGB2,KDM6B,KLF6,LDLR,LGALS1,LITAF,MALT1,NFE2L2,NFKBIZ,NLRP3,PFN1,PPP1R15A,PTEN,PTGS2,PTMA,PTPN1,REL,RPS19,S100A4,S100A8,SLAMF1,STAT3,THBS1,TLR4,TNF,TNFAIP3,TNIP1,TYROBP,YBX1	56
Cellular Movement,Immune Cell Trafficking	Leukocyte migration	1.71e-32		0.488	ACTB,ADGRE2,ADGRE5,ADM,AIF1,APOE,AQP9,AREG,BCL6,CAPG,CCL20,CCL3,CCL3L3,CCL4,CCRL2,CD14,CD36,CD44,CD55,CD58,CD63,CD9,CFD,CH25H,CST3,CTSB,CXCL2,CXCL3,CXCL8,DUSP1,EGR1,EIF4E,EZR,FABP5,FCER1G,FCGR2A,FCN1,FLT1,FPR1,FPR2,GPR132,GPR183,GRN,HCK,HIF1A,HSP90AA1,ICAM1,IL1A,IL1B,IL1RN,IL2RA,INSR,ITGB2,KDM6B,KLF6,LAMTOR2,LCP2,LDLR,LGALS1,LITAF,MALT1,MAP4K3,NFE2L2,NFKB1,NFKBIA,NFKBIZ,NLRP3,PDE4B,PELI1,PFN1,PPP…	100
Infectious Diseases,Organismal Injury and Abnormalities	Infection by coronavirus	7.41e-22		0.492	ACSL1,ACTB,ADM,ANPEP,ARL4C,ATP1A1,CCL20,CCL3,CCL4,CCRL2,CD9,CFL1,CXCL2,CXCL8,DUSP1,EGR1,EIF1,FCGR2A,FKBP5,GADD45B,GCH1,GPX1,HSPA8,ICAM1,IFNGR2,IL1A,IL1B,IL1RN,KCNJ2,KLF6,LGALS1,NAMPT,NFKB1,PDE4B,PFN1,PLEK,PMAIP1,PPP1R15A,PTEN,PTGS2,RACK1,RNF19B,S100A8,S100A9,SAMSN1,SLC1A3,SLC25A6,SYN1,TNF,TNFAIP3,TSPO,TUBA1A,ZFP36	53
Inflammatory Disease,Ophthalmic Disease,Organismal Injury and Abnormalities	Ophthalmia	3.99e-10		0.493	CCL3L3,CST3,CSTB,ICAM1,IL1B,IL1RN,INSR,ITGB2,KCNMA1,LGALS1,NFKB1,NFKBIZ,NLRP3,PDE4B,PTGS2,S100A8,SFTPC,THBS1,TNF,ZFP36	20
Connective Tissue Disorders,Organismal Injury and Abnormalities,Skeletal and Muscular Disorders	Non-traumatic arthropathy	1.21e-28		0.501	ACSL1,ADGRE5,ADM,AIF1,AKAP13,ALDH1A2,ALDOA,APOE,AQP9,AREG,ARHGDIB,BCL6,CCL20,CCL3,CCL4,CCRL2,CD36,CD44,CFD,CH25H,CST3,CTSB,CXCL2,CXCL3,CXCL8,DUSP1,DYNLL1,EEF1G,EIF1,FCGR2A,FCN1,FKBP5,FLT1,FPR2,GADD45B,GBP2,GRN,HCK,HIF1A,HLA-DQA2,HSPA8,ICAM1,IL1A,IL1B,IL1R2,IL1RN,IL2RA,ITGB2,LGALS1,MEFV,NAMPT,NDUFB10,NFKB1,NFKBIA,PDE4B,PTGS2,PTMA,PTPN1,RNF144B,RPL11,RPL15,RPL18A,RPL19,RPS13,RPS18,RPS3,S100A8,S100A…	87
Cell Death and Survival,Organismal Injury and Abnormalities	Apoptosis of tumor cell lines	1.07e-21		0.509	ABL2,ADM,APOE,AREG,ATF6,ATP1A1,BACH1,BAZ1A,BCL2A1,BCL6,BIRC3,BTG2,CCND3,CD14,CD44,CD55,CFLAR,COX6B1,CSTB,CTSB,CXCL8,DUSP1,DUSP6,DYNLL1,EEF1B2,EGR1,EIF4E,EREG,ETS2,EZR,FKBP5,FLT1,FNDC3A,GADD45B,GAS7,GPR132,GPX1,GRN,GSTP1,HCK,HIF1A,HIPK2,HNRNPC,HSPA8,IL1A,IL1B,INSR,IRAK2,IRF1,KLF6,KLF9,LGALS1,LUCAT1,MT2A,MTSS1,NFE2L2,NFKB1,NFKBIA,NFKBIZ,PDE4B,PLK3,PMAIP1,PPP1R15A,PRKCE,PTEN,PTGS2,PTMA,PTPN1,PTPN2,P…	103
Cellular Movement,Hematological System Development and Function,Immune Cell Trafficking,Inflammatory Response	Cell movement of phagocytes	3.78e-29		0.53	ADM,AIF1,APOE,AQP9,AREG,BCL6,CAPG,CCL20,CCL3,CCL3L3,CCL4,CCRL2,CD14,CD36,CD44,CD55,CD58,CD9,CFD,CST3,CTSB,CXCL2,CXCL3,CXCL8,DUSP1,EIF4E,FCER1G,FCGR2A,FCN1,FLT1,FPR1,FPR2,GPR183,GRN,HCK,HIF1A,ICAM1,IL1A,IL1B,IL1RN,IL2RA,ITGB2,KDM6B,KLF6,LDLR,LGALS1,LITAF,MALT1,NFE2L2,NFKBIA,NFKBIZ,NLRP3,PDE4B,PFN1,PPP1R15A,PTEN,PTGS2,PTMA,PTPN1,REL,RPS19,S100A4,S100A8,S100A9,SFTPC,SLAMF1,STAT3,THBS1,TLR4,TMSB10/TM…	76
Cell Morphology,Cellular Assembly and Organization,Cellular Function and Maintenance	Formation of cellular protrusions	1.51e-11		0.537	ABL2,ACTB,ALDOA,ANPEP,APOE,AREG,ARPC2,ATF6,BTG2,CAPG,CD44,CD9,CFL1,CSTB,CXCL8,ECE1,EGR1,EHD1,EIF4E,EZR,FGD4,FMN1,GAS7,GRN,HCK,HOOK2,HSP90AA1,IL1A,IL1B,IL1RAPL1,INSR,KCNJ2,KLF7,KLF9,LCP2,LIMK2,MT2A,MTSS1,NFAT5,NFE2L2,NFKB1,NFKBIA,PFN1,PRKCE,PTEN,PTGS2,RAPGEF2,RBFOX2,RPL4,RPS14,RPS6,S100A11,S100A4,SDC4,SIPA1L1,SRGAP1,STAT3,STX3,SULF2,TEX14,THBS1,TMEM59,TNF	63
Cell Death and Survival,Organismal Injury and Abnormalities	Apoptosis of antigen presenting cells	3.05e-15		0.543	APOE,BCL6,BIRC3,CD14,CFLAR,GPR132,HIF1A,IL1B,IRF1,LAMTOR2,LDLR,MEFV,NAMPT,NFE2L2,NFKB1,NFKBIA,NLRP3,PIK3AP1,PRKCE,PTEN,SOD2,STAT3,TLR4,TNF,TNFAIP3	25
Inflammatory Disease,Inflammatory Response,Organismal Injury and Abnormalities,Respiratory Disease	Inflammation of lung	6.76e-20		0.548	ACTB,ALDOA,APOE,BCL6,CCL3L3,CD14,CD36,CD44,CH25H,CXCL2,CXCL3,DUSP1,EGR1,FCGR2A,FPR2,GCH1,GPX1,HIF1A,ICAM1,IL1B,IL1RN,IL2RA,INPP5A,KCNMA1,LCP2,LDLR,LGALS1,N4BP1,NFE2L2,NFKB1,NFKBIZ,NLRP3,PTEN,PTGS2,PYCARD,S100A4,SCGB1A1,STAT3,TET2,THBS1,TKT,TLR4,TNF,TNFAIP6,TPI1,TUBA1A	46
Metabolic Disease,Organismal Injury and Abnormalities	Glucose metabolism disorder	2.5e-14		0.572	ACSL1,ADM,AIF1,ANPEP,APOC1,APOE,APOO,ATF6,ATP1A1,ATP5MJ,BCL6,BTG2,CAPG,CCL3,CCL3L3,CCL4,CCRL2,CD36,CD44,CD55,CFD,COX7C,CTSB,CXCL8,CYBA,DUSP1,EGR1,ETS2,FCER1G,FCGR2A,FKBP5,FLT1,FXYD5,GBP2,GPAT3,GPX1,GRN,GSTP1,HLA-DQA2,ICAM1,IFNGR2,IL1A,IL1B,IL1R2,IL1RN,IL2RA,INSR,IRAK2,IRAK3,IRF1,ITGB2,KCNJ2,KCNMA1,KYNU,LDLR,MT2A,NDUFA4,NFKB1,NFKBIA,NLRP3,NPL,NSUN6,PDE4B,PFDN5,PFKFB3,PLEK,PRKCE,PTEN,PTGS2,PTPN1,PT…	100
Cancer,Organismal Injury and Abnormalities	Cancer of secretory structure	5.52e-11		0.575	ABL2,ACSL1,ACTG1,ADGRE2,ADGRE5,AIF1,AKAP13,ALDH1A2,ALDOA,ANKRD28,ANPEP,AP2S1,APOC1,APOE,APOO,AREG,ARHGDIB,ARL4C,ARMC9,ARPC2,ATF6,ATP1A1,ATP6V0B,ATP6V0E1,BACH1,BAZ1A,BCL6,BIRC3,BLVRB,BTG2,C1QB,CAPG,CCL20,CCL3L3,CCL4,CCND3,CCSER1,CD14,CD36,CD44,CD55,CD58,CD63,CFD,CFL1,CFLAR,CH25H,CLIC4,COPE,CRYBG1,CSGALNACT2,CSMD1,CST3,CSTB,CTSB,CXCL2,CXCL3,CXCL8,CYBA,CYRIA,DDAH2,DENND4A,DENND5A,DLGAP1,DUSP1,DUSP6,…	299
Cellular Assembly and Organization,Cellular Function and Maintenance	Organization of cytoplasm	8.33e-14		0.59	ABL2,ACTB,ACTG1,ADM,ALDOA,ANPEP,APOE,AREG,ARPC2,ATF6,BCL6,BTG2,CAPG,CCL3,CD44,CD9,CFL1,CSTB,CXCL8,DYNLL1,ECE1,EGR1,EHD1,EIF4E,EZR,FCGR2A,FGD4,FLT1,FMN1,GABARAP,GABPB1,GAS7,GMFG,GRN,HCK,HOOK2,HSP90AA1,ICAM1,IL1A,IL1B,IL1RAPL1,INSR,KCNJ2,KLF7,KLF9,LCP2,LDLR,LIMK2,MT2A,MTSS1,NFAT5,NFE2L2,NFKB1,NFKBIA,NLRP3,OOEP,PFDN5,PFN1,PLEK,PLK3,PPT1,PRKCE,PRKCH,PTEN,PTGS2,PTPN1,RANBP2,RAPGEF2,RBFOX2,RPL4,RPS14,R…	93
Cell Death and Survival,Organismal Injury and Abnormalities	Cell death of fibroblast cell lines	2.2e-11		0.592	ABL2,ACTB,ATF6,BCL2A1,BCL6,BIRC3,CFLAR,CLIC4,CTSB,DENND4A,DUSP1,EGR1,FLT1,GADD45B,GNG2,GSTP1,HIF1A,HIPK2,KLF6,MAP1LC3B,NFE2L2,NFKB1,NFKBIA,OAZ1,PLK3,PMAIP1,PTEN,PTPN1,RANBP2,REL,SDC4,SOD2,THBS1,TNF,TNFAIP3,TNIP1	36
Cell-To-Cell Signaling and Interaction	Response of tumor cell lines	1.11e-10		0.593	ARPC2,ATF6,CD44,COX4I1,CTSB,ETS2,FCER1G,FCGR2A,FCN1,HCK,HIPK2,ICAM1,IL1B,IRF1,ITGB2,LAMTOR2,MBNL1,PELI1,PFN1,PLEK,PRKCE,PTEN,STAT3,TLR4,TMEM165,TNF,TYROBP	27
Cellular Assembly and Organization,Cellular Function and Maintenance	Organization of cytoskeleton	5.9e-15		0.595	ABL2,ACTB,ACTG1,ADM,ALDOA,ANPEP,APOE,AREG,ARPC2,ATF6,BCL6,BTG2,CAPG,CCL3,CD44,CD9,CFL1,CSTB,CXCL8,DYNLL1,ECE1,EGR1,EHD1,EIF4E,EZR,FCGR2A,FGD4,FLT1,FMN1,GABARAP,GAS7,GMFG,GRN,HCK,HOOK2,HSP90AA1,ICAM1,IL1A,IL1B,IL1RAPL1,INSR,KCNJ2,KLF7,KLF9,LCP2,LDLR,LIMK2,MT2A,MTSS1,NFAT5,NFE2L2,NFKB1,NFKBIA,NLRP3,OOEP,PFDN5,PFN1,PLEK,PLK3,PRKCE,PRKCH,PTEN,PTGS2,PTPN1,RANBP2,RAPGEF2,RBFOX2,RPL4,RPS14,RPS3,RPS6,S10…	90
Hematological System Development and Function,Inflammatory Response,Tissue Morphology	Quantity of macrophages	3.79e-10		0.596	APOE,BIRC3,CCL3,CD36,CLIC4,GPR132,GRN,HCK,IL1A,IL1B,INSR,IRAK3,ITGB2,LDLR,LITAF,NFE2L2,NFKB1,NFKBIA,NLRP3,PTEN,PTPN2,STAT3,TLR4,TNF,TNFAIP3,YBX1	26
Cell Death and Survival,Organismal Injury and Abnormalities	Cell death of tumor cell lines	1.01e-26		0.604	ABL2,ADM,APOE,AREG,ARL4C,ATF6,ATP1A1,AVPI1,BACH1,BAZ1A,BCL2A1,BCL6,BIRC3,BTG2,CCND3,CD14,CD44,CD55,CFLAR,COX6B1,CSTB,CTSB,CXCL8,CYBA,DUSP1,DUSP6,DYNLL1,EEF1B2,EGR1,EIF4E,EREG,ETS2,EZR,FCER1G,FKBP5,FLT1,FNDC3A,GADD45B,GAS7,GPR132,GPX1,GRN,GSTP1,HCK,HIF1A,HIPK2,HNRNPC,HSP90AA1,HSPA8,IL1A,IL1B,IL1RN,INSR,IRAK2,IRF1,KLF6,KLF9,LGALS1,LUCAT1,MAP1LC3B,MEFV,MT2A,MTSS1,NAMPT,NFE2L2,NFKB1,NFKBIA,NFKBIZ,NLR…	127
Cell-To-Cell Signaling and Interaction,Cellular Function and Maintenance,Inflammatory Response	Phagocytosis of phagocytes	1.66e-12		0.622	CAPG,CCL3,CD14,CD36,CD44,CH25H,CLIC4,EIF4E,FCER1G,FCGR2A,FCN1,GRN,HCK,HIF1A,ICAM1,IL1B,ITGB2,NFE2L2,PFKFB3,PTEN,S100A9,THBS1,TLR4,TNF,TYROBP	25
Cell-To-Cell Signaling and Interaction,Hematological System Development and Function,Immune Cell Trafficking,Inflammatory Response	Activation of T lymphocytes	2.92e-14		0.629	APOE,BCL6,CCL3,CCL4,CD44,CD55,CD58,CXCL8,DUSP1,FCER1G,ICAM1,IL1A,IL1B,IL2RA,IRAK3,ITGB2,LDLR,LGALS1,MALT1,NFE2L2,NFKB1,NFKBIA,NLRP3,PAG1,PELI1,PTEN,PYCARD,REL,RPS3,SERPINB9,SLAMF1,STAT3,STX11,STXBP2,THBS1,TLR4,TNF,TRAF1,TYROBP,VAMP8	40
Cell-To-Cell Signaling and Interaction,Inflammatory Response	Immune response of macrophages	2.29e-12		0.633	ATP1A1,CAPG,CCL3,CD14,CD36,CD44,CH25H,CLIC4,EIF4E,FCER1G,FCGR2A,FCN1,GRN,HCK,HIF1A,IL1B,ITGB2,NFE2L2,PFKFB3,PTEN,S100A9,THBS1,TLR4,TNF,TYROBP	25
Cellular Movement	Invasion of cells	2.34e-21		0.637	ABL2,ADGRE2,ADGRE5,ADM,AKAP13,ALDOA,ANPEP,APOC1,AREG,BCL6,BTG2,CD14,CD44,CD9,COX4I1,CST3,CTSB,CXCL2,CXCL8,CYRIA,DLGAP1,DUSP1,DUSP6,ECE1,EGR1,EIF4E,EREG,ETS2,EZR,FABP5,FGD4,FLT1,FXYD5,GBP2,GMFG,GRN,HIF1A,HIPK2,HSP90AA1,ICAM1,IL1B,ITGB2,KCNMA1,KDM6B,KLF6,KLF9,LGALS1,LIMK2,LUCAT1,MALT1,MBNL1,NAMPT,NFAT5,NFE2L2,NFKB1,NFKBIA,PAG1,PFN1,PRKCE,PTEN,PTGS2,PTPN1,PYCARD,RACK1,RANBP2,RBFOX2,REL,RNF144B,RPS4Y…	93
Cellular Function and Maintenance	Engulfment of phagocytes	4.02e-12		0.639	CAPG,CCL3,CD14,CD36,CD44,CH25H,CLIC4,EIF4E,FCER1G,FCGR2A,FCN1,GRN,GSTP1,HCK,HIF1A,ICAM1,IL1B,ITGB2,NFE2L2,PFKFB3,PTEN,S100A9,THBS1,TLR4,TNF,TYROBP	26
Cancer,Organismal Injury and Abnormalities,Tumor Morphology	Progression of tumor	3.03e-13		0.644	ABL2,ANPEP,APOE,CD44,CXCL8,EZR,FCER1G,FCGR2A,FLT1,GSTP1,HELB,HIF1A,HSP90AA1,IL1B,IL2RA,INSR,LGALS1,LIMK2,NFKB1,NFKBIA,NLRP3,OAZ1,PTEN,PTGS2,S100A4,S100A9,SOD2,STAT3,THBS1,TLR4,TNF,TUBA1A	32
Cell Death and Survival,Organismal Injury and Abnormalities	Apoptosis of epithelial cells	1.8e-13		0.646	BCL2A1,BIRC3,CCL4,CD36,CFLAR,CLIC4,CTSB,CXCL8,EGR1,EIF4E,GADD45B,GRN,HIPK2,IL1B,IRAK3,IRF1,LDLR,MAP1LC3B,NFE2L2,NFKB1,NFKBIA,NLRP3,PMAIP1,PTEN,PTGS2,PTPN1,PTPN2,REL,SFTPC,SOD2,STAT3,TLR4,TNF,TNFAIP3,TNIP1	35
Hematological System Development and Function,Inflammatory Response,Tissue Morphology	Quantity of phagocytes	6.63e-19		0.658	APOE,BCL2A1,BCL6,BIRC3,CCL20,CCL3,CCL3L3,CD36,CFLAR,CLIC4,CTSB,CXCL2,CXCL8,FCER1G,FCGR2A,FPR1,FPR2,GPR132,GPR183,GRN,HCK,ICAM1,IL1A,IL1B,IL1RN,IL2RA,INSR,IRAK3,IRF1,ITGB2,LDLR,LGALS1,LITAF,NFE2L2,NFKB1,NFKBIA,NLRP3,PDE4B,PRKCE,PTEN,PTPN2,S100A8,S100A9,STAT3,STX11,THBS1,TLR4,TNF,TNFAIP3,TYROBP,YBX1,ZFP36	52
Cellular Movement	Cell movement of myeloid cells	3.34e-29		0.67	ADGRE2,ADM,AIF1,APOE,AQP9,AREG,BCL6,CAPG,CCL20,CCL3,CCL3L3,CCL4,CD14,CD36,CD44,CD55,CD9,CFD,CST3,CTSB,CXCL2,CXCL3,CXCL8,DUSP1,EIF4E,FCER1G,FCGR2A,FCN1,FLT1,FPR1,FPR2,GRN,HCK,HIF1A,ICAM1,IL1A,IL1B,IL1RN,IL2RA,ITGB2,KDM6B,KLF6,LDLR,LGALS1,LITAF,MALT1,NFE2L2,NFKBIA,NFKBIZ,NLRP3,PDE4B,PFN1,PPP1R15A,PTEN,PTGS2,PTMA,PTPN1,REL,RPS19,S100A4,S100A8,S100A9,SCGB1A1,SFTPC,SLAMF1,STAT3,TET2,THBS1,TLR4,TMSB10/…	76
Cellular Movement	Cellular infiltration by myeloid cells	6.32e-24		0.682	ADM,APOE,AREG,CCL3,CCL4,CD14,CD36,CD44,CD55,CFD,CTSB,CXCL2,CXCL3,CXCL8,DUSP1,FCER1G,FCN1,FLT1,FPR1,FPR2,HCK,HIF1A,ICAM1,IL1A,IL1B,IL1RN,IL2RA,ITGB2,KDM6B,LDLR,LGALS1,MALT1,NFE2L2,NFKBIA,NFKBIZ,NLRP3,PPP1R15A,PTEN,PTGS2,PTMA,PTPN1,S100A8,S100A9,SCGB1A1,SFTPC,STAT3,TET2,TLR4,TNF,TNFAIP3,TNIP1,YBX1	52
Cardiovascular Disease,Organismal Injury and Abnormalities	Vascular lesion	2.79e-11		0.683	ADM,AKAP13,APOE,CCL3L3,CD36,CD44,CST3,CXCL2,EGR1,FLT1,FTL,GPX1,HIF1A,ICAM1,IL1A,IL1B,IL1RN,LDLR,NFAT5,NFE2L2,NFKB1,NFKBIA,PFN1,PTGS2,S100A4,SDC4,STAT3,THBS1,TLR4,TNFAIP3,ZFP36	31
Cell Death and Survival	Cell viability of tumor cell lines	1.43e-18		0.684	ABL2,AKAP13,ALDOA,APOE,AREG,ATF6,BACH1,BCL2A1,BCL6,BTG2,CCND3,CD44,CFLAR,CXCL2,CXCL3,CXCL8,CYBA,DENND4A,DUSP1,DUSP6,EEF1B2,EGR1,EIF4E,ELOB,EREG,FKBP5,FLT1,GMFG,GPX1,GSTP1,HCK,HELB,HIF1A,HIPK2,HSPA8,IL1A,IL1B,IL1RN,INPP5A,INSR,KDM6B,KLF6,LIMK2,LUCAT1,MACROH2A1,MALT1,MAP1LC3B,MTSS1,NAMPT,NFAT5,NFE2L2,NFKB1,NFKBIA,PFDN5,PMAIP1,PRKCE,PRKCH,PTEN,PTGS2,PTPN1,PTPN2,PYCARD,RACK1,RANBP2,REL,RPL27,RPL35A,S…	82
Cellular Function and Maintenance	Engulfment of leukocytes	6.76e-14		0.689	APOE,CAPG,CCL3,CD14,CD36,CD44,CH25H,CLIC4,EIF4E,FCER1G,FCGR2A,FCN1,FPR1,GRN,GSTP1,HCK,HIF1A,ICAM1,IL1A,IL1B,ITGB2,NFE2L2,PFKFB3,PTEN,S100A9,THBS1,TLR4,TNF,TYROBP	29
Cellular Movement	Migration of cells	5.99e-31		0.707	ABL2,ACTB,ACTG1,ADGRE2,ADGRE5,ADM,AIF1,ALDOA,ANKRD28,ANPEP,APOC1,APOE,AQP9,AREG,ARHGDIB,ARL4C,ARPC2,BCL6,BTG2,CAPG,CCL20,CCL3,CCL3L3,CCL4,CCRL2,CD14,CD36,CD44,CD55,CD58,CD63,CD9,CFD,CFL1,CH25H,CLIC4,CST3,CTSB,CXCL2,CXCL3,CXCL8,DLGAP1,DUSP1,DUSP6,EGR1,EHD1,EIF4E,EREG,EZR,FABP5,FCER1G,FCGR2A,FCN1,FGD4,FLT1,FPR1,FPR2,GBP2,GMFG,GPR132,GPR183,GRN,HCK,HIF1A,HSP90AA1,HSPA8,ICAM1,IFNGR2,IL1A,IL1B,IL1RN,I…	155
Cell-To-Cell Signaling and Interaction,Hematological System Development and Function,Immune Cell Trafficking,Inflammatory Response	Activation of mononuclear leukocytes	3.42e-16		0.707	APOE,BCL6,CCL3,CCL4,CD14,CD44,CD55,CD58,CXCL8,DUSP1,FCER1G,FCGR2A,HIF1A,ICAM1,IL1A,IL1B,IL1RN,IL2RA,IRAK3,IRF1,ITGB2,LCP2,LDLR,LGALS1,MALT1,NFE2L2,NFKB1,NFKBIA,NFKBIZ,NLRP3,PAG1,PELI1,PTEN,PYCARD,REL,RPS3,S100A9,SAMSN1,SERPINB9,SLAMF1,STAT3,STX11,STXBP2,THBS1,TLR4,TNF,TNFAIP3,TRAF1,TYROBP,VAMP8	50
Hematological System Development and Function,Tissue Morphology	Quantity of antigen presenting cells	5.86e-16		0.714	APOE,BCL2A1,BCL6,BIRC3,CCL20,CCL3,CD36,CFLAR,CLIC4,FCER1G,FPR2,GPR132,GPR183,GRN,HCK,HIF1A,IL1A,IL1B,IL1RN,IL2RA,INSR,IRAK3,IRF1,ITGB2,LDLR,LGALS1,LITAF,NFE2L2,NFKB1,NFKBIA,NLRP3,PTEN,PTPN2,STAT3,TLR4,TNF,TNFAIP3,TYROBP,YBX1	39
Dermatological Diseases and Conditions,Organismal Injury and Abnormalities	Abnormality of skin morphology	5.91e-11		0.717	APOE,CCL20,CCL4,CD44,CFD,CFL1,COX6A1,CXCL8,DYNLL1,ECE1,FLT1,FPR1,FPR2,GRN,GSTP1,HCK,IL1A,IL1B,INSR,IRF1,NFE2L2,NFKBIA,NFKBIZ,PFN1,PIGL,PRKCE,PRKCH,PTEN,PTGS2,S100A8,S100A9,SLC27A4,TKT,TMEM59,TNF	35
Cell Death and Survival,Organismal Injury and Abnormalities	Apoptosis of macrophages	1.08e-13		0.735	APOE,BIRC3,CD14,CFLAR,GPR132,HIF1A,IL1B,IRF1,LDLR,MEFV,NAMPT,NFE2L2,NFKBIA,PIK3AP1,PRKCE,PTEN,SOD2,STAT3,TLR4,TNF	20
Cell-To-Cell Signaling and Interaction,Cellular Function and Maintenance,Inflammatory Response	Phagocytosis of leukocytes	5e-13		0.749	CAPG,CCL3,CD14,CD36,CD44,CH25H,CLIC4,EIF4E,FCER1G,FCGR2A,FCN1,FPR1,GRN,HCK,HIF1A,ICAM1,IL1B,ITGB2,NFE2L2,PFKFB3,PTEN,S100A9,THBS1,TLR4,TNF,TYROBP	26
Organismal Injury and Abnormalities,Respiratory Disease	Damage of lung	1.44e-13		0.768	ADM,ATF6,ATP1A1,CCL3,CCL3L3,CD14,CD44,CXCL8,DDAH2,EGR1,FCGR2A,FLT1,HIF1A,ICAM1,IL1A,IL1B,ITGB2,MAP1LC3B,NAMPT,NFE2L2,NFKB1,NLRP3,PFKFB3,PTGS2,S100A8,SLC44A2,STAT3,TLR4,TNF,TNFAIP6,TSPO	31
Cellular Compromise,Inflammatory Response	Degranulation of phagocytes	5.09e-12		0.768	ADGRE2,ANPEP,CCL3,CCL3L3,CCL4,CD63,CD9,CXCL3,CXCL8,DUSP1,FCER1G,FCGR2A,HCK,IL1B,ITGB2,LCP2,PTEN,S100A9,STX11,STXBP2,TNF,VAMP8	22
Cell-To-Cell Signaling and Interaction,Hematological System Development and Function,Immune Cell Trafficking,Inflammatory Response	Activation of lymphocytes	2.24e-16		0.772	APOE,BCL6,CCL3,CCL4,CD44,CD55,CD58,CXCL8,DUSP1,FCER1G,FCGR2A,HIF1A,ICAM1,IL1A,IL1B,IL1RN,IL2RA,IRAK3,IRF1,ITGB2,LCP2,LDLR,LGALS1,MALT1,NFE2L2,NFKB1,NFKBIA,NFKBIZ,NLRP3,PAG1,PELI1,PTEN,PYCARD,REL,RPS3,S100A9,SAMSN1,SERPINB9,SLAMF1,STAT3,STX11,STXBP2,THBS1,TLR4,TNF,TNFAIP3,TRAF1,TYROBP,VAMP8	49
Cell-To-Cell Signaling and Interaction,Cellular Function and Maintenance,Hematological System Development and Function	Phagocytosis of myeloid cells	1.41e-13		0.773	CAPG,CCL3,CD14,CD36,CD44,CH25H,CLIC4,EIF4E,FCER1G,FCGR2A,FCN1,FPR1,GRN,HCK,HIF1A,ICAM1,IL1B,ITGB2,NFE2L2,PFKFB3,PTEN,S100A9,THBS1,TLR4,TNF,TYROBP	26
Cellular Function and Maintenance,Hematological System Development and Function	Engulfment of myeloid cells	1.5e-13		0.783	CAPG,CCL3,CD14,CD36,CD44,CH25H,CLIC4,EIF4E,FCER1G,FCGR2A,FCN1,FPR1,GRN,HCK,HIF1A,ICAM1,IL1A,IL1B,ITGB2,NFE2L2,PFKFB3,PTEN,S100A9,THBS1,TLR4,TNF,TYROBP	27
Endocrine System Disorders,Gastrointestinal Disease,Metabolic Disease,Organismal Injury and Abnormalities	Diabetes mellitus	1.8e-12		0.786	ACSL1,AIF1,ANPEP,APOC1,APOE,APOO,ATF6,ATP1A1,BCL6,BTG2,CAPG,CCL3,CCL3L3,CCL4,CCRL2,CD36,CD44,CD55,CFD,CTSB,CXCL8,CYBA,DUSP1,EGR1,FCER1G,FCGR2A,FKBP5,FLT1,FXYD5,GBP2,GPAT3,GSTP1,HLA-DQA2,ICAM1,IFNGR2,IL1A,IL1B,IL1R2,IL1RN,IL2RA,INSR,IRAK3,IRF1,ITGB2,KCNJ2,KCNMA1,KYNU,LDLR,MT2A,NFKB1,NFKBIA,NLRP3,NPL,NSUN6,PDE4B,PFKFB3,PLEK,PRKCE,PTEN,PTGS2,PTPN1,PTPN2,REL,RPL10A,RPL28,RPL41,RPS18,RPS20,RPS6,S100A4…	85
Cellular Movement	Invasion of tumor cell lines	8.4e-14		0.788	ABL2,ADGRE2,ADGRE5,ADM,ALDOA,APOC1,AREG,BTG2,CD44,CD9,CTSB,CXCL8,CYRIA,DLGAP1,DUSP1,DUSP6,ECE1,EGR1,EIF4E,EREG,ETS2,EZR,FABP5,FXYD5,GBP2,GRN,HIF1A,HIPK2,HSP90AA1,IL1B,ITGB2,KDM6B,KLF6,KLF9,LGALS1,LIMK2,LUCAT1,MALT1,MBNL1,NAMPT,NFAT5,NFKB1,NFKBIA,PRKCE,PTEN,PTGS2,PTPN1,RACK1,RANBP2,RBFOX2,REL,RNF144B,RPS4Y1,S100A11,S100A4,S100A6,S100A9,SCGB3A1,SDC4,SDHD,SOD2,SRGAP1,STAT3,TET2,THBS1,TMSB10/TMSB4X,T…	70
Cellular Movement,Hematological System Development and Function,Immune Cell Trafficking,Inflammatory Response	Cell movement of macrophages	7.69e-23		0.812	APOE,AREG,BCL6,CCL3,CCL3L3,CCL4,CD14,CD44,CD55,CFD,CXCL3,CXCL8,EIF4E,FCN1,FLT1,FPR2,HCK,HIF1A,ICAM1,IL1A,IL1B,IL1RN,ITGB2,KDM6B,KLF6,LDLR,LGALS1,LITAF,NFE2L2,NFKBIZ,NLRP3,PFN1,PPP1R15A,PTEN,PTGS2,PTMA,PTPN1,REL,S100A4,S100A8,SLAMF1,STAT3,THBS1,TNF,TNFAIP3,TYROBP,YBX1	47
Cell Signaling	I-kappaB kinase/NF-kappaB cascade	6.52e-13		0.818	ABL2,AKAP13,BIRC3,CARD16,CD36,GSTP1,IL1A,IL1B,IRF1,LGALS1,MALT1,NFKBIA,PELI1,PRKCE,PYCARD,REL,RHOH,S100A4,SLC44A2,TLR4,TNF,TNFAIP3,TNIP1,TNIP3	24
Cellular Compromise,Inflammatory Response	Degranulation of cells	9.39e-11		0.842	ADGRE2,ANPEP,CCL3,CCL3L3,CCL4,CD63,CD9,CXCL3,CXCL8,DUSP1,FCER1G,FCGR2A,FPR1,HCK,IL1B,ITGB2,LCP2,PAG1,PTEN,S100A9,STX11,STXBP2,TNF,TNFAIP3,VAMP8	25
Inflammatory Response,Organismal Injury and Abnormalities,Respiratory Disease	Inflammation of respiratory system component	1.12e-17		0.862	ACTB,ALDOA,APOE,BCL6,CCL3L3,CD14,CD36,CD44,CFLAR,CH25H,CXCL2,CXCL3,CXCL8,DUSP1,EGR1,FCGR2A,FPR2,GCH1,GPX1,HCK,HIF1A,ICAM1,IL1B,IL1RN,IL2RA,INPP5A,INSR,IRAK3,KCNMA1,LCP2,LDLR,LGALS1,LTA4H,N4BP1,NFE2L2,NFKB1,NFKBIA,NFKBIZ,NLRP3,PDE4B,PTEN,PTGS2,PYCARD,RPS6,S100A4,SCGB1A1,STAT3,TET2,THBS1,TKT,TLR4,TNF,TNFAIP6,TPI1,TUBA1A	55
Cellular Compromise,Inflammatory Response	Degranulation of leukocytes	1.11e-11		0.865	ADGRE2,ANPEP,CCL3,CCL3L3,CCL4,CD63,CD9,CXCL3,CXCL8,DUSP1,FCER1G,FCGR2A,FPR1,HCK,IL1B,ITGB2,LCP2,PTEN,S100A9,STX11,STXBP2,TNF,TNFAIP3,VAMP8	24
Hematological System Development and Function,Lymphoid Tissue Structure and Development,Tissue Morphology	Quantity of CD4+ T-lymphocytes	4.17e-12		0.869	ANPEP,APOE,FABP5,FCER1G,GPR132,HIF1A,ICAM1,IL1RN,IRF1,ITGB2,LCP2,LDLR,MALT1,NFKB1,PELI1,PIK3AP1,PRKCH,PTEN,PTPN2,PYCARD,RHOH,S100A8,S100A9,STAT3,THBS1,TNF,TNIP1	27
Tissue Development	Growth of epithelial tissue	8.58e-15		0.87	ADM,ALDH1A2,APOE,AREG,BCL2A1,CCND3,CD36,CD44,CD9,CFLAR,CTSB,CXCL3,CXCL8,CYBA,EDF1,EGR1,EIF4E,EREG,EZR,FLT1,FPR2,GRN,HIF1A,HIPK2,IL1A,IL1B,IL1RN,INSR,KCNJ2,KDM6B,KLF9,LGALS1,MTSS1,NFE2L2,NFKB1,NFKBIA,PFKFB3,PRKCE,PRKCH,PTEN,PTGS2,PTPN1,PTPN12,REL,RNF144B,S100A11,S100A8,S100A9,SAV1,SDC4,STAT3,SULF2,THBS1,TLR4,TNF,TNFAIP3,TNFAIP6,TNFAIP8,ZFP36	59
Cellular Movement,Hematological System Development and Function,Immune Cell Trafficking,Inflammatory Response	Cellular infiltration by phagocytes	3.6e-23		0.875	ADM,APOE,AREG,CCL3,CCL4,CD14,CD36,CD44,CD55,CFD,CTSB,CXCL2,CXCL3,CXCL8,DUSP1,FCER1G,FCN1,FLT1,FPR1,FPR2,HIF1A,ICAM1,IL1A,IL1B,IL1RN,IL2RA,ITGB2,KDM6B,LDLR,LGALS1,MALT1,NFE2L2,NFKBIA,NFKBIZ,NLRP3,PPP1R15A,PTEN,PTGS2,PTMA,PTPN1,S100A8,S100A9,SFTPC,STAT3,TLR4,TNF,TNFAIP3,TNIP1,YBX1	49
Cell Cycle,Gene Expression	Binding of DNA	6.89e-12		0.882	BTG2,CFL1,CFLAR,CTSB,CXCL8,EGR1,ETS2,GABPB1,GBP2,GPX1,GSTP1,HCK,HIF1A,HIPK2,HNRNPC,IL1A,IL1B,IL1RN,INSR,IRF1,ITGB2,LCP2,LGALS1,NFE2L2,NFKB1,NFKBIA,NFKBIZ,PELI1,PLK3,PRKCE,PTEN,PTPN1,RACK1,RANBP2,REL,SOD2,STAT3,SUB1,TLR4,TNF,TNFAIP3,TP53BP2,YBX1,YWHAB	44
Immunological Disease,Inflammatory Disease,Organismal Injury and Abnormalities	Immune mediated inflammatory disease	1.34e-34		0.893	ACSL1,ACTB,ADGRE2,ADGRE5,ADM,AIF1,AKAP13,ALDOA,APOE,AQP9,AREG,ARHGDIB,BCL2A1,BCL6,C1QB,CAPG,CCL20,CCL3,CCL3L3,CCL4,CCND3,CCRL2,CD36,CD44,CD9,CFD,CFL1,CFLAR,COX6A1,CST3,CTSB,CXCL2,CXCL3,CXCL8,DUSP1,DYNLL1,EEF1G,EIF1,EZR,FABP5,FCER1G,FCGR2A,FCN1,FKBP5,FLT1,FPR1,FPR2,GADD45B,GBP2,GRN,HCK,HIF1A,HLA-DQA2,HSPA8,ICAM1,IL1A,IL1B,IL1R2,IL1RN,IL2RA,IRF1,ISG20,ITGB2,KCNMA1,LCP2,LGALS1,MALT1,MEFV,MT2A,NAMPT,…	121
Hematological Disease,Infectious Diseases,Organismal Injury and Abnormalities	Endotoxin shock response	3.14e-11		0.893	BIRC3,CD14,CLIC4,FCGR2A,HCK,ICAM1,IL1RN,IRAK2,NLRP3,PTGS2,PYCARD,S100A9,STAT3,TLR4,TNF,TNFAIP3	16
Organismal Survival	Survival of organism	4.69e-21		0.921	ACSL1,ADM,AKAP13,ALDH1A2,APOE,AQP9,AREG,ARHGDIB,ATF6,BCL2A1,BCL6,BIRC3,CCL3,CCL3L3,CD14,CD44,CD55,CH25H,CLIC4,CTSB,CXCL2,CXCL3,DUSP1,EREG,ETS2,FCGR2A,FLT1,FTL,GABARAP,GBP2,GPR132,GPX1,GRN,GSTP1,HIF1A,HIPK2,ICAM1,IL1A,IL1B,IL1RN,IL2RA,INSR,IRAK3,IRF1,KLF6,LDLR,LGALS1,LITAF,NAMPT,NFE2L2,NFKB1,NFKBIA,NLRP3,PPP1R15A,PTEN,PTGS2,PTPN1,PTPN2,PYCARD,REL,S100A9,SAV1,SERPINB9,SGMS2,SLC1A2,SOD2,STAT3,TET2,T…	75
Dermatological Diseases and Conditions,Organismal Injury and Abnormalities	Psoriasis	6.57e-25		0.956	ADGRE5,ADM,APOC1,APOE,AQP9,ARHGDIB,CCL20,CCND3,CD36,CD63,CFD,CFL1,CFLAR,CRYBG1,CSTB,CTSB,CXCL3,CXCL8,DUSP1,EGR1,EIF4E,ELL2,FABP5,FCGR2A,FLT1,GBP2,GK,GSTP1,H2AZ1,HIF1A,HSPA8,ICAM1,IFNGR2,IL1A,IL1B,IL1RN,IL2RA,ISG20,ITGB2,KYNU,LDLR,LGALS1,MACROH2A1,N4BP1,NAMPT,PDE4B,PRKCE,PTGS2,S100A11,S100A8,S100A9,SLC27A4,SOD2,SUB1,TLR4,TNF,TNFAIP3,TNFAIP6,TNIP1,YWHAB,ZBTB16,ZFP36	62
Cellular Movement	Cell movement	1.76e-29		0.961	ABL2,ACTB,ACTG1,ADGRE2,ADGRE5,ADM,AIF1,ALDOA,ANKRD28,ANPEP,APOC1,APOE,AQP9,AREG,ARHGDIB,ARL4C,ARPC2,BCL6,BTG2,CAPG,CCL20,CCL3,CCL3L3,CCL4,CCRL2,CD14,CD36,CD44,CD55,CD58,CD63,CD9,CFD,CFL1,CH25H,CLIC4,CST3,CTSB,CXCL2,CXCL3,CXCL8,DLGAP1,DUSP1,DUSP6,EGR1,EHD1,EIF4E,EREG,EZR,FABP5,FCER1G,FCGR2A,FCN1,FGD4,FLT1,FPR1,FPR2,GBP2,GMFG,GPR132,GPR183,GRN,HCK,HIF1A,HSP90AA1,HSPA8,ICAM1,IFNGR2,IL1A,IL1B,IL1R2,I…	162
Cell-To-Cell Signaling and Interaction,Inflammatory Response	Response of macrophages	3.65e-13		0.968	ATP1A1,CAPG,CCL3,CD14,CD36,CD44,CH25H,CLIC4,EIF4E,FCER1G,FCGR2A,FCN1,GRN,HCK,HIF1A,IL1B,ITGB2,NFE2L2,PFKFB3,PRKCE,PTEN,S100A9,STAT3,THBS1,TLR4,TNF,TYROBP	27
Cell Death and Survival,Hematological System Development and Function	Cell viability of myeloid cells	3.41e-11		0.977	ADGRE2,BCL2A1,BCL6,CCL4,CFLAR,CXCL8,FCER1G,HIF1A,ICAM1,IL1B,ITGB2,NFKBIA,SOD2,STAT3,TLR4,TNF,TYROBP	17
Cancer,Organismal Injury and Abnormalities	Neoplasia of cells	2.88e-18		0.993	ABL2,ACSL1,ACTB,ACTG1,ADGRE2,ADGRE5,AKAP13,ALDH1A2,ANPEP,APOC1,APOE,AREG,ARMC9,ATF6,ATP1A1,BACH1,BCL6,BIRC3,BTG2,C1QC,CCL20,CCL3,CCL4,CCND3,CCSER1,CD14,CD300E,CD36,CD44,CD55,CD58,CD63,CD9,CFD,CFL1,CFLAR,CRYBG1,CSGALNACT2,CSMD1,CST3,CTSB,CXCL2,CXCL3,CXCL8,CYBA,DBI,DENND4A,DLGAP1,DUSP1,DUSP6,DYNLL1,ECE1,EEF1G,EGR1,EHD1,EIF4E,EREG,EZR,FABP5,FCER1G,FCGR2A,FGD4,FLT1,FLVCR2,FMN1,FNDC3A,FPR1,FPR2,FXYD5,…	235
Cell-To-Cell Signaling and Interaction,Inflammatory Response	Immune response of phagocytes	3.39e-16		0.997	ANPEP,ATP1A1,CAPG,CCL3,CD14,CD36,CD44,CH25H,CLIC4,CST3,CXCL3,CXCL8,EIF4E,FCER1G,FCGR2A,FCN1,FPR1,GRN,HCK,HIF1A,HSP90AA1,ICAM1,IL1B,ITGB2,NFE2L2,PFKFB3,PTEN,S100A9,SERPINB9,STAT3,THBS1,TLR4,TNF,TYROBP	34
Cancer,Hematological Disease,Organismal Injury and Abnormalities	Mature lymphocytic neoplasm	3.26e-10		1	ANPEP,APOE,ARMC9,ATF6,BCL6,BIRC3,BTG2,CCL20,CCL3,CCL4,CCND3,CD300E,CD36,CD44,CD58,CD63,CFL1,CFLAR,CRYBG1,CSGALNACT2,CSMD1,CST3,CXCL2,CXCL8,DENND4A,DUSP1,EGR1,EHD1,EIF4E,FCGR2A,FLT1,GADD45B,GBP2,GPR183,HCK,HELB,HIF1A,HLA-DQA2,HSP90AA1,HSPA8,IL1B,IL1RN,IL2RA,INPP5A,IRF1,ISG20,ITGB2,KDM6B,KLF6,LCP2,MALT1,NAMPT,NBPF10 (includes others),NFE2L2,NFKB1,NFKBIA,PAG1,PFKFB3,PKP2,PMAIP1,PNRC1,POLE4,PPP1R15A,…	92
Cardiovascular Disease,Organismal Injury and Abnormalities,Skeletal and Muscular Disorders	Myocardial infarction	2.4e-10		1.021	ADM,APOE,BACH1,CCL3L3,CD14,CD36,CD44,CD55,CXCL8,CYBA,DUSP6,FCER1G,FCGR2A,FLT1,HIF1A,IL1A,IL1B,IL1RN,INSR,ITGB2,KCNJ2,LDLR,PRKCE,PTGS2,TNF,TUBA1A	26
Lipid Metabolism,Small Molecule Biochemistry	Fatty acid metabolism	2.04e-10		1.035	ACSL1,AKAP13,APOC1,APOE,AQP9,AREG,CCL3L3,CD14,CD36,CD9,CXCL3,CXCL8,DBI,EEPD1,EGR1,EREG,FABP5,FCER1G,FCGR2A,FPR1,GPX1,GSTP1,HIF1A,HSPA8,IL1A,IL1B,IL1R2,IL1RN,LDLR,LTA4H,MGST3,NFE2L2,NFKB1,NFKBIA,NPC2,PPT1,PTGS2,S100A8,S100A9,SGMS2,SLC1A3,SLC27A4,STAT3,TBXAS1,TLR4,TNF,TSPO	47
Cellular Compromise,Inflammatory Response	Degranulation of myeloid cells	2.61e-12		1.047	ADGRE2,ANPEP,CCL3,CCL3L3,CCL4,CD63,CD9,CXCL3,CXCL8,DUSP1,FCER1G,FCGR2A,FPR1,HCK,IL1B,ITGB2,LCP2,PTEN,S100A9,STX11,STXBP2,TNF,VAMP8	23
Cellular Function and Maintenance	Function of antigen presenting cells	7.42e-23		1.067	ANPEP,APOE,BCL2A1,BIRC3,CAPG,CD14,CD36,CD9,EGR1,FCER1G,FCGR2A,FLT1,FPR2,GADD45B,GRN,HCK,HSP90AA1,ICAM1,IL1B,IRAK2,IRAK3,IRF1,MALT1,N4BP1,NFKB1,NFKBIA,NLRP3,PTGS2,PYCARD,REL,SAMSN1,SGMS2,SLAMF1,STAT3,TLR4,TNF,TYROBP,ZFP36	38
Cellular Movement	Cell movement of connective tissue cells	3.85e-12		1.085	ABL2,ACTB,ADM,APOE,CCL3,CCL4,CD44,CXCL8,EHD1,EZR,GPR183,HCK,HIF1A,IL1B,KCNMA1,LAMTOR2,LGALS1,NFAT5,PRKCE,PTEN,PTPN2,RACK1,S100A4,SDC4,STAT3,THBS1,TNF,ZFAND5	28
Cell Death and Survival,Organismal Injury and Abnormalities	Necrosis	6.19e-35		1.093	ABL2,ACSL1,ACTB,ADGRE2,ADM,ALDH1A2,ALDOA,ANPEP,APOC1,APOE,AREG,ARL4C,ARPC2,ATF6,ATP1A1,AVPI1,BACH1,BAZ1A,BCL2A1,BCL6,BIRC3,BTG2,CCL3,CCL3L3,CCL4,CCND3,CD14,CD36,CD44,CD55,CD9,CFLAR,CLIC4,COX6B1,CST3,CSTB,CTSB,CXCL2,CXCL3,CXCL8,CYBA,DENND4A,DUSP1,DUSP6,DYNLL1,EEF1B2,EGR1,EIF4E,EREG,ETS2,EZR,FCER1G,FKBP5,FLT1,FNDC3A,FPR2,GADD45B,GAS7,GCH1,GNG2,GPR132,GPX1,GRN,GSTP1,HCK,HIF1A,HIPK2,HNRNPC,HSP90AA1,H…	187
Cellular Movement,Hematological System Development and Function,Immune Cell Trafficking	Migration of antigen presenting cells	4.92e-11		1.096	APOE,BCL6,CCL20,CCL3,CCL3L3,CCL4,CD44,CD58,CXCL3,CXCL8,FLT1,FPR2,HCK,HIF1A,ICAM1,IL1B,IL1RN,KLF6,LGALS1,PTGS2,S100A8,TNF,TYROBP	23
Organismal Injury and Abnormalities,Respiratory Disease	Acute respiratory disorder	2.55e-19		1.1	ACSL1,ANPEP,ARL4C,ATF6,ATP1A1,BACH1,CCL3,CCL3L3,CD14,CD63,CD9,CXCL8,EGR1,ELOB,FCGR2A,FLT1,FPR1,GPX1,ICAM1,IL1A,IL1B,KCNMA1,LTA4H,MNDA,MYL6,NAMPT,NFE2L2,NFKBIA,NLRP3,PDE4B,PTGS2,RPS4Y1,S100A9,SLC44A2,STAT3,STXBP2,TALDO1,TKT,TLR4,TNF,TNFAIP6,TSPO	42
Cell Death and Survival,Organismal Injury and Abnormalities,Renal and Urological Disease	Cell death of kidney cells	3.99e-13		1.113	APOE,ATF6,ATP1A1,BCL2A1,BCL6,BIRC3,CD44,CFLAR,DUSP1,EZR,FLT1,GAS7,GNG2,GSTP1,HIF1A,HIPK2,ICAM1,IL1B,IRF1,MEFV,NAMPT,NFE2L2,NFKB1,NFKBIA,NLRP3,PMAIP1,PPP1R15A,PTGS2,PYCARD,SDHD,SELENOT,SOD2,STAT3,TLR4,TNF,TP53BP2,TRAF1	37
Cell Cycle	Cell cycle progression	1.84e-10		1.118	ACTB,ADM,AIF1,APOE,AREG,BAZ1A,BCL2A1,BCL6,BTG2,CCL3,CCND3,CD14,CD44,CSTB,DBI,DUSP1,EGR1,EIF4E,EREG,EZR,FCGR2A,FLT1,GADD45B,GBP2,GPR132,GPX1,GRN,HIF1A,HIPK2,HSPA8,IL1A,IL1B,INSR,IRF1,KLF6,LIMK2,NFKB1,NFKBIA,PLK3,PPP1R15A,PRKCH,PTEN,PTGS2,PTMA,PTPN1,PTPN2,RACK1,REL,RPL11,RPS3,RPS6,RPS9,S100A4,SCGB3A1,STAT3,THBS1,TLR4,TNF,TP53BP2,TSPO,TUBA1A,YWHAB,ZBTB16,ZFP36	64
Cellular Development,Cellular Growth and Proliferation	Proliferation of blood cells	3.38e-30		1.131	AIF1,AKAP13,ANPEP,APOE,ARHGDIB,BCL2A1,BCL6,BIRC3,CCL20,CCL3,CCL3L3,CCL4,CCND3,CD14,CD36,CD44,CD55,CD58,CFLAR,CXCL2,CXCL3,CXCL8,DUSP1,EGR1,EHD1,EIF4E,ELOB,ETS2,EZR,FCER1G,FCGR2A,FTL,GADD45B,GCH1,GPR183,GSTP1,HCK,HIF1A,HIPK2,HSPA8,ICAM1,IL1A,IL1B,IL1RN,IL2RA,INSR,IRF1,ISG20,ITGB2,KLF9,LAMTOR2,LCP2,LDLR,LGALS1,MALT1,MNDA,NDUFB10,NFAT5,NFE2L2,NFKB1,NFKBIA,PAG1,PELI1,PIK3AP1,PMAIP1,PRKCE,PRKCH,PTEN,PT…	91
Cardiovascular Disease,Organismal Injury and Abnormalities	Atherosclerosis	3.07e-14		1.159	AKAP13,APOC1,APOE,BIRC3,CCL3L3,CD14,CD36,CD44,CD55,CSMD1,CST3,CXCL2,EGR1,EREG,FABP5,FLT1,GPX1,HIF1A,ICAM1,IL1A,IL1B,INSR,ITGB2,KCNJ2,KLF6,LDLR,NFE2L2,NFKB1,NFKBIA,PDE4B,PFN1,PRKCH,PTGS2,S100A8,S100A9,SDC4,STAT3,THBS1,TKT,TLR4,TNF,TNFAIP3,TUBA1A,ZFP36	44
Cell Death and Survival	Removal of cells	3.9e-12		1.166	CCL3,CCL3L3,CD14,CD36,CD44,CFLAR,CLIC4,FABP5,FCER1G,FCGR2A,GPR132,IL1B,IL1RN,LDLR,NLRP3,PTEN,TLR4,TNF,TNFAIP3	19
Cell Death and Survival,Cellular Function and Maintenance	Clearance of cells	1.03e-11		1.166	CCL3,CCL3L3,CD14,CD36,CD44,CFLAR,CLIC4,FABP5,FCER1G,FCGR2A,GPR132,IL1B,IL1RN,NLRP3,PTEN,TLR4,TNF,TNFAIP3	18
Cell Signaling,Small Molecule Biochemistry	Synthesis of nitric oxide	2.83e-14		1.18	ADM,AIF1,APOE,BCL6,CD14,CD36,CYBA,DDAH2,DUSP1,DUSP6,DYNLL1,FLT1,GCH1,HCK,HIF1A,HSP90AA1,ICAM1,IL1A,IL1B,IL1R2,IL1RN,INSR,IRF1,ITGB2,KLF6,NFE2L2,NFKBIA,PFN1,PRKCE,PTGS2,PTPN2,S100A9,SOD2,TLR4,TNF,TNFAIP3,TSPO	37
Cellular Movement,Immune Cell Trafficking	Cellular infiltration by lymphoid cells	5.99e-11		1.193	APOE,CCL3,CCL3L3,CD44,CXCL8,GPR132,HIF1A,IL1A,IL1B,IL2RA,LCP2,LDLR,LGALS1,MALT1,MAP4K3,NFKB1,NFKBIA,NLRP3,PTEN,PTGS2,S100A4,STAT3,TNF,TNIP1	24
Cell Signaling	Protein kinase cascade	5.77e-13		1.203	ABL2,AKAP13,AVPI1,BIRC3,CARD16,CCL3,CD36,DUSP1,DUSP6,FGD4,FLT1,GADD45B,GSTP1,HIPK2,IL1A,IL1B,INSR,IRF1,LAMTOR2,LGALS1,LILRA5,MALT1,MAP4K3,NFKB1,NFKBIA,PELI1,PRKCE,PYCARD,REL,RHOH,S100A4,SLAMF1,SLC44A2,STAT3,TLR4,TNF,TNFAIP3,TNIP1,TNIP3,ZFP36	40
Cellular Development,Cellular Growth and Proliferation,Hematological System Development and Function,Hematopoiesis,Lymphoid Tissue Structure and Development,Tissue Development	Development of mononuclear leukocytes	2.08e-13		1.247	ABL2,ADM,BCL2A1,BCL6,CCL3,CCND3,CD14,CD36,CD44,CFLAR,CST3,EGR1,EIF4E,ETS2,EZR,FCER1G,FCGR2A,FLT1,GADD45B,GPR183,HIF1A,HSP90AA1,ICAM1,IFNGR2,IL1A,IL1B,IL1RN,IL2RA,IRAK3,IRF1,ITGB2,LCP2,LGALS1,MALT1,NFKB1,NFKBIA,NFKBIZ,NLRP3,PAG1,PIK3AP1,PRKCH,PTEN,PTGS2,PTPN12,PTPN2,REL,RHOH,RPS6,SLAMF1,STAT3,TLR4,TNF,TNFAIP3,TYROBP,ZBTB16	55
Cellular Movement,Hematological System Development and Function,Immune Cell Trafficking	Cellular infiltration by mononuclear leukocytes	1.49e-14		1.273	APOE,CCL3,CCL3L3,CCL4,CD44,CD55,CXCL8,FLT1,GPR132,HCK,HIF1A,IL1A,IL1B,IL2RA,KDM6B,LDLR,LGALS1,MALT1,MAP4K3,NFKB1,NFKBIA,NFKBIZ,NLRP3,PTEN,PTGS2,S100A4,SFTPC,STAT3,TNF,TNIP1	30
Cellular Movement	Migration of connective tissue cells	1.89e-11		1.292	ABL2,ACTB,ADM,APOE,CCL3,CCL4,CD44,EHD1,HCK,HIF1A,IL1B,KCNMA1,LAMTOR2,LGALS1,NFAT5,PRKCE,PTEN,PTPN2,RACK1,SDC4,STAT3,THBS1,TNF,ZFAND5	24
Cell-mediated Immune Response,Cellular Movement,Hematological System Development and Function,Immune Cell Trafficking	T cell migration	1.2e-13		1.293	ACTB,AIF1,APOE,CCL20,CCL3,CCL3L3,CCL4,CD44,CXCL8,EZR,FABP5,HSP90AA1,ICAM1,IL1A,IL1B,IL2RA,INSR,ITGB2,LCP2,LDLR,LGALS1,MALT1,MAP4K3,NLRP3,PFN1,PTEN,PTGS2,PYCARD,S100A4,STAT3,THBS1,TLR4,TNF,TNIP1	34
Cardiovascular System Development and Function,Cell-To-Cell Signaling and Interaction	Adhesion of endothelial cells	3.69e-10		1.301	ADGRE5,CCL3,CCL4,CD36,CD44,CD63,CXCL2,CXCL8,FLT1,ICAM1,IL1A,IL1B,ITGB2,NFKBIA,PTPN12,RACK1,SULF2,THBS1,TMSB10/TMSB4X,TNF	20
Cell-To-Cell Signaling and Interaction,Inflammatory Response	Immune response of leukocytes	2.97e-18		1.306	ANPEP,APOE,ATP1A1,BCL6,CAPG,CCL3,CD14,CD36,CD44,CH25H,CLIC4,CST3,CXCL3,CXCL8,EIF4E,FCER1G,FCGR2A,FCN1,FPR1,GRN,HCK,HIF1A,HSP90AA1,ICAM1,IL1B,IL2RA,ITGB2,LCP2,LGALS1,MALT1,NAMPT,NFE2L2,PFKFB3,PTEN,PYCARD,REL,S100A9,SERPINB9,STAT3,THBS1,TLR4,TNF,TYROBP	43
Cellular Development,Cellular Growth and Proliferation,Hematological System Development and Function,Hematopoiesis,Lymphoid Tissue Structure and Development,Tissue Development	Leukopoiesis	9.31e-15		1.325	ABL2,ADM,AKAP13,BCL2A1,BCL6,C1QC,CCL3,CCND3,CD14,CD36,CD44,CD9,CFLAR,CST3,CXCL3,CXCL8,EGR1,EIF4E,ETS2,EZR,FCER1G,FCGR2A,FLT1,GADD45B,GPR183,HIF1A,HSP90AA1,ICAM1,IFNGR2,IL1A,IL1B,IL1RN,IL2RA,IRAK3,IRF1,ITGB2,LCP2,LDLR,LGALS1,MALT1,NFE2L2,NFKB1,NFKBIA,NFKBIZ,NLRP3,PAG1,PIK3AP1,PRKCH,PTEN,PTGS2,PTPN12,PTPN2,REL,RHOH,RPS6,S100A9,SLAMF1,STAT3,TET2,TLR4,TNF,TNFAIP3,TYROBP,ZBTB16	64
Hematological System Development and Function,Inflammatory Response,Tissue Morphology	Quantity of dendritic cells	1.21e-10		1.331	BCL2A1,BCL6,CCL20,CFLAR,FCER1G,FPR2,GPR183,IL1B,IL1RN,IL2RA,IRF1,ITGB2,LDLR,LGALS1,NFKB1,STAT3,TLR4,TNF,TYROBP	19
Cardiovascular Disease,Organismal Injury and Abnormalities	Occlusion of artery	1.38e-12		1.339	AKAP13,APOC1,APOE,BIRC3,CCL3L3,CD14,CD36,CD44,CD55,CSMD1,CST3,CXCL2,CXCL8,EGR1,EREG,FABP5,FLT1,GPX1,HIF1A,ICAM1,IL1A,IL1B,INSR,ITGB2,KCNJ2,KLF6,LDLR,NFE2L2,NFKB1,NFKBIA,PDE4B,PFN1,PRKCH,PTGS2,S100A8,S100A9,SDC4,STAT3,THBS1,TKT,TLR4,TNF,TNFAIP3,TUBA1A,ZFP36	45
Organismal Injury and Abnormalities,Renal and Urological Disease	Damage of kidney	1.04e-10		1.339	ADM,ANPEP,APOE,ATP1A1,CD14,CD44,CD55,CST3,DUSP1,FCGR2A,GABPB1,GRN,HCK,HIF1A,ICAM1,KCNMA1,LCP2,NFE2L2,NLRP3,PDE4B,THBS1,TLR4,TNF,YBX1	24
Cellular Development	Maturation of blood cells	9.53e-12		1.341	ADM,CCL20,CCND3,CD36,CD44,EGR1,FPR1,GPR132,GSTP1,HIF1A,HNRNPC,ICAM1,IL1A,IL1B,IL2RA,IRF1,ITGB2,PRKCE,PTEN,PTGS2,PTMA,RHOH,RPS6,STAT3,THBS1,TLR4,TNF,TYROBP	28
Cellular Movement,Hematological System Development and Function,Immune Cell Trafficking,Inflammatory Response	Migration of phagocytes	3.29e-12		1.342	APOE,BCL6,CCL20,CCL3,CCL3L3,CCL4,CD44,CD58,CXCL2,CXCL3,CXCL8,FLT1,FPR1,FPR2,HCK,HIF1A,ICAM1,IL1B,IL1RN,ITGB2,KLF6,LDLR,LGALS1,NLRP3,PDE4B,PTEN,PTGS2,S100A8,S100A9,TLR4,TNF,TYROBP	32
Cellular Movement,Hematological System Development and Function,Immune Cell Trafficking,Inflammatory Response	Cell movement of monocytes	8.11e-11		1.352	AIF1,APOE,CCL20,CCL3,CCL4,CXCL3,CXCL8,DUSP1,FLT1,FPR1,FPR2,ICAM1,IL1B,ITGB2,KDM6B,LDLR,LGALS1,NFKBIZ,RPS19,SFTPC,TNF,TNIP1	22
Cellular Function and Maintenance	Function of blood cells	5.6e-27		1.381	AKAP13,ANPEP,APOE,AQP9,ARHGDIB,BCL2A1,BCL6,BIRC3,CAPG,CCRL2,CD14,CD36,CD44,CD55,CD9,CXCL8,DUSP1,EGR1,FCER1G,FCGR2A,FLT1,FPR2,GADD45B,GPX1,GRN,HCK,HSP90AA1,ICAM1,IFNGR2,IL1B,IL2RA,IRAK2,IRAK3,IRF1,ITGB2,LGALS1,MALT1,N4BP1,NFE2L2,NFKB1,NFKBIA,NFKBIZ,NLRP3,NPC2,PTEN,PTGS2,PYCARD,RAPGEF2,REL,S100A4,SAMSN1,SERPINB9,SGMS2,SLAMF1,STAT3,STX11,TET2,TLR4,TNF,TNFAIP3,TP53BP2,TYROBP,ZFP36	63
Cellular Function and Maintenance	Function of leukocytes	2.03e-25		1.381	AKAP13,ANPEP,APOE,ARHGDIB,BCL2A1,BCL6,BIRC3,CAPG,CCRL2,CD14,CD36,CD44,CD9,CXCL8,DUSP1,EGR1,FCER1G,FCGR2A,FLT1,FPR2,GADD45B,GRN,HCK,HSP90AA1,ICAM1,IFNGR2,IL1B,IL2RA,IRAK2,IRAK3,IRF1,ITGB2,LGALS1,MALT1,N4BP1,NFKB1,NFKBIA,NFKBIZ,NLRP3,NPC2,PTEN,PTGS2,PYCARD,REL,S100A4,SAMSN1,SERPINB9,SGMS2,SLAMF1,STAT3,STX11,TET2,TLR4,TNF,TNFAIP3,TP53BP2,TYROBP,ZFP36	58
Cellular Movement,Hematological System Development and Function,Immune Cell Trafficking	Cellular infiltration by granulocytes	2.2e-23		1.384	ADM,APOE,AREG,CCL3,CCL4,CD14,CD36,CD44,CD55,CFD,CTSB,CXCL2,CXCL3,CXCL8,DUSP1,FCER1G,FCN1,FPR1,FPR2,HCK,HIF1A,ICAM1,IL1A,IL1B,IL1RN,IL2RA,ITGB2,LGALS1,MALT1,NFE2L2,NFKBIA,NFKBIZ,NLRP3,PTGS2,S100A8,S100A9,SCGB1A1,STAT3,TLR4,TNF,TNFAIP3,TNIP1,YBX1	43
Cellular Development,Hematological System Development and Function,Lymphoid Tissue Structure and Development	Maturation of leukocytes	4.88e-11		1.386	ADM,CCL20,CD36,CD44,EGR1,FPR1,GPR132,GSTP1,HIF1A,HNRNPC,ICAM1,IL1A,IL1B,IL2RA,IRF1,ITGB2,PTEN,PTGS2,PTMA,RHOH,STAT3,THBS1,TLR4,TNF,TYROBP	25
Cellular Movement,Hematological System Development and Function,Immune Cell Trafficking	Cell movement of granulocytes	2.12e-23		1.389	ADGRE2,ADM,APOE,AQP9,AREG,CAPG,CCL3,CCL3L3,CCL4,CD14,CD36,CD44,CD55,CFD,CST3,CTSB,CXCL2,CXCL3,CXCL8,DUSP1,FCER1G,FCGR2A,FCN1,FPR1,FPR2,GRN,HCK,HIF1A,ICAM1,IL1A,IL1B,IL1RN,IL2RA,ITGB2,LGALS1,MALT1,NFE2L2,NFKBIA,NFKBIZ,NLRP3,PDE4B,PTEN,PTGS2,RPS19,S100A8,S100A9,SCGB1A1,STAT3,TLR4,TMSB10/TMSB4X,TNF,TNFAIP3,TNFAIP6,TNIP1,YBX1	55
Connective Tissue Disorders,Organismal Injury and Abnormalities,Tissue Morphology	Deterioration of connective tissue	4.61e-13		1.391	AREG,CD14,CFD,CXCL3,CXCL8,DUSP1,EGR1,FCER1G,FCGR2A,FCN1,HIF1A,IL1A,IL1B,IL1RN,NAMPT,NFE2L2,PTGS2,S100A4,SDC4,STAT3,SULF2,TLR4,TNF,TNFAIP3,TNFAIP6,TSPO	26
Cellular Function and Maintenance,Hematological System Development and Function	Function of lymphocytes	1.47e-12		1.4	AKAP13,APOE,ARHGDIB,BCL6,BIRC3,CCRL2,CD44,DUSP1,FCER1G,FCGR2A,GADD45B,ICAM1,IFNGR2,IL1B,IL2RA,IRF1,LGALS1,NFKB1,NPC2,PTEN,REL,SAMSN1,SERPINB9,SLAMF1,STAT3,STX11,TET2,TLR4,TNF,TP53BP2,TYROBP	31
Cell Death and Survival,Organismal Injury and Abnormalities	Cell viability of phagocytes	7.77e-11		1.4	ADGRE2,BCL2A1,BCL6,CCL4,CFLAR,FCER1G,HIF1A,IL1B,NFKB1,NFKBIA,REL,SERPINB9,SOD2,STAT3,TLR4,TNF,TYROBP	17
Cellular Development,Hematological System Development and Function,Lymphoid Tissue Structure and Development	Maturation of phagocytes	2.47e-11		1.41	ADM,CCL20,CD36,CD44,EGR1,FPR1,GPR132,GSTP1,HNRNPC,ICAM1,IL1A,IL1B,IL2RA,IRF1,ITGB2,STAT3,THBS1,TLR4,TNF,TYROBP	20
Cellular Function and Maintenance	Function of lymphatic system cells	4.15e-14		1.421	AKAP13,APOE,ARHGDIB,BCL6,BIRC3,CCND3,CCRL2,CD44,DUSP1,FCER1G,FCGR2A,FPR2,GADD45B,ICAM1,IFNGR2,IL1B,IL2RA,IRF1,LGALS1,NFE2L2,NFKB1,NPC2,PTEN,REL,SAMSN1,SERPINB9,SLAMF1,STAT3,STX11,TET2,TLR4,TNF,TP53BP2,TYROBP	34
Hematological System Development and Function,Tissue Morphology	Quantity of blood cells	2.12e-23		1.423	ADGRE5,AKAP13,ANPEP,APOE,ARHGDIB,BCL2A1,BCL6,BIRC3,CCL20,CCL3,CCL3L3,CCL4,CCND3,CD36,CD44,CD9,CFLAR,CLIC4,CTSB,CXCL2,CXCL8,DUSP1,EGR1,ETS2,FABP5,FCER1G,FCGR2A,FLT1,FPR1,FPR2,GPR132,GPR183,GRN,GSTP1,HCK,HIF1A,ICAM1,IL1A,IL1B,IL1RN,IL2RA,INSR,IRAK3,IRF1,ITGB2,KLF6,LCP2,LDLR,LGALS1,LITAF,MALT1,N4BP1,NFAT5,NFE2L2,NFKB1,NFKBIA,NLRP3,NPC2,PAG1,PDE4B,PELI1,PIK3AP1,PPP1R15A,PRKCE,PRKCH,PTEN,PTGS2,PTPN2,P…	92
Cellular Function and Maintenance	Function of phagocytes	7.82e-22		1.432	ANPEP,APOE,BCL2A1,BIRC3,CAPG,CD14,CD36,CD9,CXCL8,EGR1,FCER1G,FCGR2A,FLT1,FPR2,GADD45B,GRN,HCK,HSP90AA1,ICAM1,IL1B,IRAK2,IRAK3,IRF1,MALT1,N4BP1,NFKB1,NFKBIA,NLRP3,PTGS2,PYCARD,REL,SAMSN1,SGMS2,SLAMF1,STAT3,TLR4,TNF,TYROBP,ZFP36	39
Immunological Disease,Organismal Injury and Abnormalities	Allergy	9.71e-20		1.437	ACTB,ADGRE2,ALDOA,BTG2,CAPG,CCL20,CCL3,CCL4,CD44,CD63,CFL1,CST3,CXCL8,DUSP1,EGR1,EIF1,FABP5,FCER1G,FCGR2A,FPR2,GCH1,HCK,ICAM1,IL1A,IL1B,IL1RN,IL2RA,KCNMA1,LCP2,LDLR,LGALS1,MALT1,NFKBIA,NFKBIZ,PDE4B,PELI1,PFKFB3,PTEN,PTGS2,RPS14,S100A11,S100A8,S100A9,TKT,TLR4,TNF,TNFAIP3,TPI1,ZFP36	49
Cellular Movement,Hematological System Development and Function,Immune Cell Trafficking,Inflammatory Response	Cell movement of dendritic cells	1.45e-12		1.44	APOE,CCL20,CCL3,CCL3L3,CCL4,CCRL2,CD44,CD58,CXCL8,FPR1,FPR2,GPR183,HIF1A,ICAM1,IL1A,IL1B,LGALS1,MALT1,NLRP3,RPS19,SLAMF1,TLR4,TNF,TNIP1	24
Cellular Movement,Hematological System Development and Function,Immune Cell Trafficking	Cellular infiltration by lymphocytes	2.88e-10		1.451	APOE,CCL3,CCL3L3,CD44,CXCL8,GPR132,HIF1A,IL1A,IL1B,IL2RA,LDLR,LGALS1,MALT1,MAP4K3,NFKB1,NFKBIA,NLRP3,PTEN,PTGS2,S100A4,STAT3,TNF,TNIP1	23
Cellular Development,Cellular Growth and Proliferation,Hematological System Development and Function,Hematopoiesis,Lymphoid Tissue Structure and Development,Tissue Development	Hematopoiesis of mononuclear leukocytes	6.57e-13		1.468	ABL2,BCL2A1,BCL6,CCL3,CCND3,CD14,CD36,CD44,CFLAR,CST3,EGR1,EIF4E,ETS2,EZR,FCER1G,FCGR2A,FLT1,GADD45B,GPR183,HIF1A,HSP90AA1,ICAM1,IFNGR2,IL1A,IL1B,IL1RN,IL2RA,IRAK3,IRF1,ITGB2,LCP2,LGALS1,MALT1,NFKB1,NFKBIA,NFKBIZ,NLRP3,PAG1,PIK3AP1,PRKCH,PTEN,PTGS2,PTPN12,PTPN2,REL,RHOH,RPS6,SLAMF1,STAT3,TLR4,TNF,TNFAIP3,TYROBP,ZBTB16	54
Cell-To-Cell Signaling and Interaction,Inflammatory Response	Response of phagocytes	2.15e-17		1.472	ADGRE2,ANPEP,ATP1A1,CAPG,CCL3,CD14,CD36,CD44,CD9,CH25H,CLIC4,CST3,CXCL3,CXCL8,EIF4E,FCER1G,FCGR2A,FCN1,FPR1,GRN,HCK,HIF1A,HSP90AA1,ICAM1,IL1B,ITGB2,NFE2L2,PFKFB3,PRKCE,PTEN,S100A9,SERPINB9,STAT3,THBS1,TLR4,TNF,TYROBP	37
Hematological System Development and Function,Immune Cell Trafficking,Inflammatory Response,Tissue Development	Accumulation of phagocytes	1.35e-16		1.492	APOE,BCL6,CCL3,CD44,CXCL2,CXCL3,CXCL8,EGR1,ETS2,FCGR2A,GRN,HCK,HIF1A,IL1B,IL1RN,IRF1,ITGB2,LDLR,PFN1,PIK3AP1,S100A8,S100A9,STAT3,THBS1,TLR4,TNF,TYROBP	27
Post-Translational Modification	Phosphorylation of protein	2.81e-13		1.492	ABL2,ADM,AIF1,AREG,BIRC3,CCL3,CCL4,CCND3,CD36,CD44,CD55,CD9,CFL1,CXCL8,DUSP1,DUSP6,DYNLL1,EREG,FAM20A,FCER1G,FCGR2A,FLT1,FPR2,GMFG,HCK,HIPK2,HSP90AA1,HSPA8,IL1B,INSR,IRAK3,ITGB2,LGALS1,LIMK2,MAP4K3,OOEP,OXSR1,PAG1,PLK3,PRKCE,PRKCH,PTEN,PTPN1,PTPN12,PTPN2,RACK1,SAMSN1,STAT3,SYN1,THBS1,TNF,TYROBP	52
Hematological System Development and Function,Tissue Morphology	Quantity of leukocytes	1.84e-22		1.497	ADGRE5,AKAP13,ANPEP,APOE,ARHGDIB,BCL2A1,BCL6,BIRC3,CCL20,CCL3,CCL3L3,CCL4,CCND3,CD36,CD44,CFLAR,CLIC4,CTSB,CXCL2,CXCL8,DUSP1,EGR1,ETS2,FABP5,FCER1G,FCGR2A,FLT1,FPR1,FPR2,GPR132,GPR183,GRN,GSTP1,HCK,HIF1A,ICAM1,IL1A,IL1B,IL1RN,IL2RA,INSR,IRAK3,IRF1,ITGB2,KLF6,LCP2,LDLR,LGALS1,LITAF,MALT1,N4BP1,NFAT5,NFE2L2,NFKB1,NFKBIA,NLRP3,NPC2,PAG1,PDE4B,PELI1,PIK3AP1,PRKCE,PRKCH,PTEN,PTGS2,PTPN2,PYCARD,REL,RHO…	85
Cellular Movement	Cell movement of tumor cell lines	9.56e-18		1.502	ADGRE2,ADGRE5,AIF1,ALDOA,ANKRD28,ANPEP,APOC1,AREG,ARHGDIB,ARL4C,ARPC2,CCL20,CCL3,CCL3L3,CCL4,CD36,CD44,CD9,CLIC4,CST3,CTSB,CXCL2,CXCL3,CXCL8,DLGAP1,DUSP6,EGR1,EIF4E,EREG,EZR,FGD4,FLT1,FPR1,FPR2,GBP2,GMFG,GPR132,GRN,HCK,HIF1A,HSP90AA1,IL1A,IL1B,KDM6B,KLF6,KLF9,LCP2,LGALS1,LIMK2,LUCAT1,MALT1,MAP1LC3B,MBNL1,MTSS1,NAMPT,NFE2L2,NFKB1,NFKBIA,PAG1,PFN1,PRKCE,PTEN,PTGS2,PTPN1,PTPN12,RACK1,RANBP2,RNF144B,…	87
Organismal Injury and Abnormalities	Damage of genitourinary system	1e-10		1.508	ADM,ANPEP,APOE,AREG,ATP1A1,CD14,CD44,CD55,CST3,DUSP1,FCGR2A,GABPB1,GRN,HCK,HIF1A,ICAM1,KCNMA1,LCP2,NFE2L2,NLRP3,PDE4B,THBS1,TLR4,TNF,YBX1	25
Cellular Development,Cellular Growth and Proliferation,Embryonic Development,Hematological System Development and Function,Hematopoiesis,Lymphoid Tissue Structure and Development,Organ Development,Organismal Development,Tissue Development	Lymphopoiesis	1.83e-13		1.51	ABL2,BCL2A1,BCL6,CCL3,CCND3,CD14,CD36,CD44,CFLAR,EGR1,EIF4E,ETS2,EZR,FCER1G,FCGR2A,FLT1,GADD45B,GPR183,HIF1A,HSP90AA1,ICAM1,IFNGR2,IL1A,IL1B,IL1RN,IL2RA,IRAK3,IRF1,ITGB2,LCP2,LGALS1,MALT1,NFKB1,NFKBIA,NFKBIZ,NLRP3,PAG1,PIK3AP1,PRKCH,PTEN,PTGS2,PTPN12,PTPN2,REL,RHOH,RPS6,SLAMF1,STAT3,TLR4,TNF,TNFAIP3,TYROBP,ZBTB16	53
Hematological System Development and Function,Immune Cell Trafficking,Inflammatory Response,Tissue Development	Accumulation of neutrophils	5.08e-13		1.527	BCL6,CCL3,CD44,CXCL2,CXCL3,CXCL8,EGR1,FCGR2A,GRN,IL1B,IL1RN,ITGB2,PIK3AP1,S100A8,S100A9,TLR4,TNF	17
Lipid Metabolism,Small Molecule Biochemistry	Synthesis of lipid	1.14e-10		1.533	ACSL1,ADM,ALDH1A2,ANPEP,APOC1,APOE,AREG,ATF6,ATP1A1,CCL3L3,CD14,CD36,CD9,CH25H,CXCL3,CXCL8,DBI,EGR1,EREG,FABP5,FCER1G,FCGR2A,FLT1,FPR1,FPR2,GK,GPAT3,HIF1A,HSPA8,IL1A,IL1B,IL1R2,IL1RN,INSR,ITGB2,LDLR,LTA4H,MGST3,NFE2L2,NFKB1,NFKBIA,NPC2,PIGL,PKP2,PPT1,PTEN,PTGS2,SGMS2,SLC1A3,SLC27A4,SLC44A2,STAT3,TBXAS1,TLR4,TNF,TSPO,YBX1	57
Cellular Development,Cellular Growth and Proliferation,Hematological System Development and Function,Lymphoid Tissue Structure and Development	Cell proliferation of T lymphocytes	1.8e-23		1.539	AIF1,AKAP13,APOE,ARHGDIB,BIRC3,CCL4,CCND3,CD14,CD36,CD44,CD55,CD58,CFLAR,CXCL8,DUSP1,EGR1,EHD1,EIF4E,ELOB,ETS2,FCER1G,FTL,GADD45B,GCH1,HIF1A,HSPA8,ICAM1,IL1A,IL1B,IL2RA,INSR,IRF1,ISG20,ITGB2,LCP2,LGALS1,MALT1,NDUFB10,NFAT5,NFE2L2,NFKB1,NFKBIA,PAG1,PELI1,PRKCE,PRKCH,PTEN,PTGS2,PTPN2,PYCARD,REL,RHOH,RPS3,SAMSN1,SCGB1A1,SDC4,SERPINB9,SLAMF1,STAT3,THBS1,TLR4,TNF,TNFAIP3,TRAF1,TYROBP,ZBTB16	66
Cellular Movement,Hematological System Development and Function,Immune Cell Trafficking,Inflammatory Response	Infiltration by neutrophils	2.71e-23		1.541	ADM,APOE,CCL3,CCL4,CD14,CD36,CD44,CD55,CFD,CTSB,CXCL2,CXCL3,CXCL8,DUSP1,FCER1G,FCN1,FPR1,FPR2,ICAM1,IL1A,IL1B,IL1RN,IL2RA,ITGB2,LGALS1,MALT1,NFE2L2,NFKBIA,NFKBIZ,NLRP3,PTGS2,S100A8,S100A9,STAT3,TLR4,TNF,TNFAIP3,TNIP1,YBX1	39
Cellular Growth and Proliferation,Lymphoid Tissue Structure and Development	Proliferation of lymphatic system cells	4.85e-27		1.555	AIF1,AKAP13,APOE,ARHGDIB,BCL2A1,BCL6,BIRC3,CCL20,CCL3,CCL4,CCND3,CD14,CD36,CD44,CD55,CD58,CFLAR,CXCL3,CXCL8,DUSP1,EGR1,EHD1,EIF4E,ELOB,ETS2,EZR,FCER1G,FCGR2A,FTL,GADD45B,GCH1,GPR183,GSTP1,HCK,HIF1A,HSPA8,ICAM1,IL1A,IL1B,IL1RN,IL2RA,INSR,IRF1,ISG20,ITGB2,KLF9,LCP2,LGALS1,MALT1,MNDA,NDUFB10,NFAT5,NFE2L2,NFKB1,NFKBIA,OSTF1,PAG1,PELI1,PIK3AP1,PMAIP1,PRKCE,PRKCH,PTEN,PTGS2,PTPN2,PYCARD,REL,RHOH,RPS3,S…	82
Cellular Movement,Hematological System Development and Function,Immune Cell Trafficking	Cell rolling of leukocytes	2.37e-11		1.563	CD14,CD44,CD63,CXCL2,CXCL3,CXCL8,FCGR2A,FPR2,HCK,ICAM1,IL1B,ITGB2,LCP2,TLR4,TNF	15
Cellular Movement	Homing of cells	2.72e-18		1.565	ADGRE2,AIF1,APOE,AQP9,ARPC2,CAPG,CCL20,CCL3,CCL3L3,CCL4,CCRL2,CD36,CD44,CD9,CH25H,CST3,CXCL2,CXCL3,CXCL8,DUSP1,DUSP6,FCER1G,FCGR2A,FLT1,FPR1,FPR2,GPR132,GPR183,GRN,HCK,ICAM1,IL1A,IL1B,ITGB2,LDLR,LGALS1,LITAF,MTSS1,PDE4B,PFN1,PTEN,PTGS2,PTPN1,PTPN2,REL,RPS19,S100A4,S100A8,S100A9,SLAMF1,STAT3,STX3,THBS1,TLR4,TMSB10/TMSB4X,TNF,TNFAIP6	57
Cellular Movement	Cell rolling of blood cells	2.14e-12		1.577	CD14,CD36,CD44,CD63,CXCL2,CXCL3,CXCL8,FCGR2A,FPR2,HCK,ICAM1,IL1B,ITGB2,LCP2,TLR4,TNF	16
Cellular Development,Cellular Growth and Proliferation,Hematological System Development and Function,Hematopoiesis,Lymphoid Tissue Structure and Development,Tissue Development	Differentiation of mononuclear leukocytes	2.3e-13		1.583	ABL2,BCL2A1,BCL6,CCL3,CCND3,CD14,CD36,CD44,CFLAR,CST3,CXCL8,EGR1,EIF4E,ETS2,EZR,FCER1G,FCGR2A,FLT1,GADD45B,GPR183,HIF1A,HSP90AA1,ICAM1,IFNGR2,IL1A,IL1B,IL1RN,IL2RA,IRAK3,IRF1,ITGB2,LCP2,LGALS1,MALT1,NFKB1,NFKBIA,NFKBIZ,NLRP3,PAG1,PIK3AP1,PRKCH,PTEN,PTGS2,PTPN12,PTPN2,REL,RHOH,RPS6,SLAMF1,STAT3,TLR4,TNF,TNFAIP3,TYROBP,ZBTB16	55
Inflammatory Response	Immune response of cells	4.13e-24		1.585	ABL2,ANPEP,APOE,ARPC2,ATP1A1,BCL6,BIRC3,CAPG,CCL20,CCL3,CD14,CD36,CD44,CH25H,CLIC4,COX4I1,CST3,CTSB,CXCL3,CXCL8,CYBA,EHD1,EIF4E,ETS2,FCER1G,FCGR2A,FCN1,FPR1,FPR2,GRN,HCK,HIF1A,HSP90AA1,HSPA8,ICAM1,IL1B,IL2RA,IRF1,ITGB2,LAMTOR2,LCP2,LDLR,LGALS1,LITAF,MALT1,MBNL1,NAMPT,NFE2L2,NFKBIA,NLRP3,PELI1,PFKFB3,PFN1,PLEK,PRKCE,PTEN,PYCARD,RACK1,REL,S100A8,S100A9,SERPINB9,STAT3,THBS1,TLR4,TMEM165,TNF,TYROBP,V…	69
Cell-To-Cell Signaling and Interaction,Hematological System Development and Function,Immune Cell Trafficking	Adhesion of granulocytes	1.41e-10		1.61	ADGRE2,ADGRE5,CD44,CXCL2,CXCL3,CXCL8,FLT1,FPR2,HCK,ICAM1,IL1B,ITGB2,LGALS1,S100A8,S100A9,SLC44A2,TLR4,TNF	18
Cellular Movement,Hematological System Development and Function,Immune Cell Trafficking,Inflammatory Response	Cell movement of neutrophils	3.16e-23		1.614	ADM,APOE,AQP9,CAPG,CCL3,CCL3L3,CCL4,CD14,CD36,CD44,CD55,CFD,CST3,CTSB,CXCL2,CXCL3,CXCL8,DUSP1,FCER1G,FCGR2A,FCN1,FPR1,FPR2,GRN,HCK,ICAM1,IL1A,IL1B,IL1RN,IL2RA,ITGB2,LGALS1,MALT1,NFE2L2,NFKBIA,NFKBIZ,NLRP3,PDE4B,PTEN,PTGS2,S100A8,S100A9,STAT3,TLR4,TMSB10/TMSB4X,TNF,TNFAIP3,TNFAIP6,TNIP1,YBX1	50
Cellular Development,Hematological System Development and Function,Lymphoid Tissue Structure and Development	Maturation of dendritic cells	1.41e-10		1.63	ADM,CCL20,CD36,CD44,EGR1,FPR1,GSTP1,HNRNPC,ICAM1,IL1A,IL1B,IL2RA,IRF1,ITGB2,THBS1,TLR4,TNF,TYROBP	18
Cellular Movement	Extravasation of cells	3.32e-10		1.633	CCL3,CCL3L3,CCL4,CD44,CD63,CSTB,CXCL8,ICAM1,IL1A,IL1B,ITGB2,LDLR,S100A9,TNF,TNFAIP6	15
Cellular Development,Cellular Growth and Proliferation	Cell proliferation of tumor cell lines	5.24e-16		1.656	ABL2,ACTB,ADM,ALDH1A2,ALDOA,AREG,ARL4C,BACH1,BCL6,BIRC3,BTG2,CCL20,CCL3,CCND3,CD44,CD63,CD9,CFLAR,CTSB,CXCL8,CYRIA,DUSP1,DUSP6,DYNLL1,EEF1B2,EGR1,EIF1,EIF4E,EREG,ETS2,EZR,FABP5,FCER1G,FKBP5,FLT1,FPR2,FTL,GPX1,GRN,GSTP1,H2AZ1,HCK,HIF1A,HIPK2,HSP90AA1,IL1A,IL1B,IL1RN,IL2RA,INSR,IRF1,KLF6,KLF7,LCOR,LGALS1,LUCAT1,MACROH2A1,MALT1,MT2A,NACA,NAMPT,NFE2L2,NFKB1,NFKBIA,OAZ1,PAG1,PFKFB3,PFN1,PPT1,PRKCE,PRK…	117
Hematological System Development and Function,Lymphoid Tissue Structure and Development,Tissue Morphology	Quantity of T lymphocytes	1.22e-12		1.673	ANPEP,APOE,ARHGDIB,BCL2A1,CCL4,CCND3,CD44,CFLAR,ETS2,FABP5,FCER1G,GPR132,HIF1A,ICAM1,IL1RN,IL2RA,INSR,IRAK3,IRF1,ITGB2,LCP2,LDLR,LGALS1,MALT1,N4BP1,NFAT5,NFKB1,NFKBIA,NLRP3,PAG1,PELI1,PIK3AP1,PRKCH,PTEN,PTPN2,PYCARD,REL,RHOH,S100A8,S100A9,STAT3,THBS1,TLR4,TNF,TNFAIP3,TNIP1,ZFP36	47
Cellular Function and Maintenance	Homeostasis of blood cells	4.01e-12		1.675	ABL2,BCL2A1,BCL6,CCL3,CFLAR,EGR1,EIF4E,ETS2,FCER1G,FCGR2A,FLT1,GADD45B,GPR183,HIF1A,HSP90AA1,ICAM1,IFNGR2,IL1A,IL1B,IL1RN,IL2RA,IRAK3,IRF1,ITGB2,LCP2,LGALS1,MALT1,NFKBIA,NFKBIZ,NLRP3,PAG1,PDE4B,PRKCH,PTEN,PTGS2,PTPN2,REL,RHOH,RPS6,SLAMF1,STAT3,TET2,TLR4,TNF,TNFAIP3,TYROBP,ZBTB16	47
Cellular Movement,Hematological System Development and Function,Immune Cell Trafficking,Inflammatory Response	Chemokinesis of neutrophils	3.69e-10		1.706	CCL3,CCL4,CXCL3,CXCL8,S100A9,TNF	6
Cellular Movement,Hematological System Development and Function,Immune Cell Trafficking,Inflammatory Response	Chemotaxis of phagocytes	4.46e-22		1.711	AIF1,APOE,AQP9,CAPG,CCL20,CCL3,CCL3L3,CCL4,CCRL2,CD9,CST3,CXCL2,CXCL3,CXCL8,DUSP1,FCER1G,FCGR2A,FLT1,FPR1,FPR2,GPR183,GRN,HCK,ICAM1,IL1A,IL1B,ITGB2,LDLR,LGALS1,LITAF,PDE4B,PFN1,PTEN,REL,RPS19,S100A4,S100A8,S100A9,SLAMF1,THBS1,TLR4,TMSB10/TMSB4X,TNF,TNFAIP6	44
Cardiovascular Disease,Organismal Injury and Abnormalities	Infarction of heart	7.4e-11		1.712	ADM,APOE,BACH1,CCL3L3,CD14,CD36,CD44,CD55,CXCL8,CYBA,DUSP6,FCER1G,FCGR2A,FLT1,HIF1A,IL1A,IL1B,IL1RN,INSR,ITGB2,KCNJ2,LDLR,PRKCE,PTGS2,TLR4,TNF,TUBA1A	27
Cellular Movement,Hematological System Development and Function,Immune Cell Trafficking	Cell movement of mononuclear leukocytes	3.83e-20		1.713	ACTB,AIF1,APOE,CCL20,CCL3,CCL3L3,CCL4,CD44,CD55,CD58,CH25H,CXCL3,CXCL8,DUSP1,EZR,FABP5,FLT1,FPR1,FPR2,GPR132,GPR183,HCK,HIF1A,HSP90AA1,ICAM1,IL1A,IL1B,IL2RA,INSR,ITGB2,KDM6B,LCP2,LDLR,LGALS1,MALT1,MAP4K3,NFKB1,NFKBIA,NFKBIZ,NLRP3,PELI1,PFN1,PTEN,PTGS2,PTPN2,PYCARD,RPS19,S100A4,SAMSN1,SERP1,SFTPC,STAT3,THBS1,TLR4,TNF,TNIP1	56
Cell-mediated Immune Response,Cellular Movement,Hematological System Development and Function,Immune Cell Trafficking	Cell movement of T lymphocytes	5.14e-12		1.725	APOE,CCL20,CCL3,CCL3L3,CCL4,CD44,CXCL8,FABP5,HSP90AA1,ICAM1,IL1A,IL1B,IL2RA,INSR,ITGB2,LCP2,LDLR,LGALS1,MALT1,MAP4K3,NLRP3,PFN1,PTEN,PTGS2,S100A4,STAT3,THBS1,TLR4,TNF,TNIP1	30
Cellular Function and Maintenance	Homeostasis of leukocytes	6.1e-12		1.733	ABL2,BCL2A1,BCL6,CCL3,CFLAR,EGR1,EIF4E,ETS2,FCER1G,FCGR2A,FLT1,GADD45B,GPR183,HIF1A,HSP90AA1,ICAM1,IFNGR2,IL1A,IL1B,IL1RN,IL2RA,IRAK3,IRF1,ITGB2,LCP2,LGALS1,MALT1,NFKBIA,NFKBIZ,NLRP3,PAG1,PDE4B,PRKCH,PTEN,PTGS2,PTPN2,REL,RHOH,RPS6,SLAMF1,STAT3,TLR4,TNF,TNFAIP3,TYROBP,ZBTB16	46
Cellular Function and Maintenance	Lymphocyte homeostasis	1.15e-11		1.733	ABL2,BCL2A1,BCL6,CCL3,CFLAR,EGR1,EIF4E,ETS2,FCER1G,FCGR2A,FLT1,GADD45B,GPR183,HIF1A,HSP90AA1,ICAM1,IFNGR2,IL1A,IL1B,IL1RN,IL2RA,IRAK3,IRF1,ITGB2,LCP2,LGALS1,MALT1,NFKBIA,NFKBIZ,NLRP3,PAG1,PRKCH,PTEN,PTGS2,PTPN2,REL,RHOH,RPS6,SLAMF1,STAT3,TLR4,TNF,TNFAIP3,TYROBP,ZBTB16	45
Cellular Development,Cellular Growth and Proliferation,Hematological System Development and Function,Lymphoid Tissue Structure and Development	Proliferation of immune cells	7.76e-30		1.744	AIF1,AKAP13,ANPEP,APOE,ARHGDIB,BCL2A1,BCL6,BIRC3,CCL4,CCND3,CD14,CD36,CD44,CD55,CD58,CFLAR,CXCL2,CXCL3,CXCL8,DUSP1,EGR1,EHD1,EIF4E,ELOB,ETS2,EZR,FCER1G,FCGR2A,FTL,GADD45B,GCH1,GPR183,GSTP1,HCK,HIF1A,HSPA8,ICAM1,IL1A,IL1B,IL1RN,IL2RA,INSR,IRF1,ISG20,ITGB2,KLF9,LAMTOR2,LCP2,LDLR,LGALS1,MALT1,MNDA,NDUFB10,NFAT5,NFE2L2,NFKB1,NFKBIA,PAG1,PELI1,PIK3AP1,PMAIP1,PRKCE,PRKCH,PTEN,PTGS2,PTPN2,PYCARD,REL,RHO…	86
Cellular Development	Maturation of cells	2.24e-10		1.753	ABL2,ADM,AREG,CCL20,CCND3,CD36,CD44,EGR1,EREG,FPR1,GAS7,GPR132,GSTP1,HIF1A,HIPK2,HNRNPC,ICAM1,IL1A,IL1B,IL2RA,IRF1,ITGB2,KCNMA1,KLF9,PFN1,PRKCE,PTEN,PTGS2,PTMA,PTPN1,RHOH,RPS6,STAT3,THBS1,TLR4,TNF,TYROBP	37
Cardiovascular Disease,Organismal Injury and Abnormalities	Infarction	5.09e-13		1.764	ADM,APOE,ATP1A1,BACH1,CCL3L3,CD14,CD36,CD44,CD55,CST3,CXCL8,CYBA,DUSP6,EGR1,FCER1G,FCGR2A,FLT1,GPX1,GRN,HIF1A,IL1A,IL1B,IL1RN,INSR,IRF1,ITGB2,KCNJ2,LDLR,NAMPT,NFKB1,NFKBIA,NLRP3,PRKCE,PRKCH,PTGS2,TLR4,TNF,TNFAIP3,TUBA1A	39
Cell-To-Cell Signaling and Interaction	Immune response of myeloid cells	6.67e-15		1.769	ANPEP,ATP1A1,CAPG,CCL3,CD14,CD36,CD44,CH25H,CLIC4,CXCL3,CXCL8,EIF4E,FCER1G,FCGR2A,FCN1,FPR1,GRN,HCK,HIF1A,ICAM1,IL1B,ITGB2,NFE2L2,PFKFB3,PTEN,S100A9,STAT3,THBS1,TLR4,TNF,TYROBP	31
Cell Signaling,Post-Translational Modification	Tyrosine phosphorylation of protein	1.62e-13		1.769	ADM,CCL3,CCL4,CD36,CD44,CD55,CD9,DUSP1,FCER1G,FCGR2A,HCK,IL1B,INSR,ITGB2,LGALS1,PAG1,PTEN,PTPN1,PTPN2,RACK1,SAMSN1,SYN1,THBS1,TNF,TYROBP	25
Cell-To-Cell Signaling and Interaction	Adhesion of myeloid cells	3.08e-10		1.772	ADGRE2,ADGRE5,CD44,CXCL2,CXCL3,CXCL8,FLT1,FPR2,HCK,HIF1A,ICAM1,IL1A,IL1B,ITGB2,LGALS1,PTGS2,S100A8,S100A9,SLC44A2,TLR4,TNF	21
Hematological System Development and Function,Tissue Development	Accumulation of myeloid cells	5.27e-19		1.779	ADGRE5,APOE,BCL2A1,BCL6,CCL3,CCL3L3,CD44,CXCL2,CXCL3,CXCL8,EGR1,ETS2,FCGR2A,GRN,HCK,HIF1A,IL1B,IL1RN,IRF1,ITGB2,LDLR,NLRP3,PFN1,PIK3AP1,PTEN,PTGS2,S100A8,S100A9,STAT3,THBS1,TLR4,TNF	32
Cellular Movement,Skeletal and Muscular System Development and Function	Cell movement of vascular smooth muscle cells	1.28e-10		1.829	ADM,AIF1,CCL3,CD44,CLIC4,CXCL8,EGR1,FLT1,HIF1A,NAMPT,NFE2L2,PTGS2,S100A4,SDC4,STAT3,THBS1,TLR4,TNF	18
Cellular Development,Cellular Growth and Proliferation,Hematological System Development and Function,Lymphoid Tissue Structure and Development	Proliferation of mononuclear leukocytes	4.21e-28		1.83	AIF1,AKAP13,ANPEP,APOE,ARHGDIB,BCL2A1,BCL6,BIRC3,CCL4,CCND3,CD14,CD36,CD44,CD55,CD58,CFLAR,CXCL2,CXCL8,DUSP1,EGR1,EHD1,EIF4E,ELOB,ETS2,EZR,FCER1G,FCGR2A,FTL,GADD45B,GCH1,GPR183,GSTP1,HCK,HIF1A,HSPA8,ICAM1,IL1A,IL1B,IL1RN,IL2RA,INSR,IRF1,ISG20,ITGB2,KLF9,LCP2,LGALS1,MALT1,MNDA,NDUFB10,NFAT5,NFE2L2,NFKB1,NFKBIA,PAG1,PELI1,PIK3AP1,PMAIP1,PRKCE,PRKCH,PTEN,PTGS2,PTPN2,PYCARD,REL,RHOH,RPS3,SAMSN1,SCGB1…	81
Hematological System Development and Function,Lymphoid Tissue Structure and Development,Tissue Morphology	Quantity of lymphocytes	8.67e-16		1.833	AKAP13,ANPEP,APOE,ARHGDIB,BCL2A1,CCL4,CCND3,CD36,CD44,CFLAR,CTSB,EGR1,ETS2,FABP5,FCER1G,FCGR2A,FLT1,GPR132,GPR183,GSTP1,HIF1A,ICAM1,IL1B,IL1RN,IL2RA,INSR,IRAK3,IRF1,ITGB2,LCP2,LDLR,LGALS1,MALT1,N4BP1,NFAT5,NFKB1,NFKBIA,NLRP3,NPC2,PAG1,PELI1,PIK3AP1,PRKCH,PTEN,PTPN2,PYCARD,REL,RHOH,S100A8,S100A9,SAMSN1,STAT3,TET2,THBS1,TLR4,TNF,TNFAIP3,TNIP1,TRAF1,TSPO,TYROBP,ZFP36	62
Cellular Movement	Cell tethering or rolling of leukocytes	6.89e-11		1.834	CD14,CD44,CD63,CXCL2,CXCL3,CXCL8,FCGR2A,FPR2,HCK,ICAM1,IL1B,ITGB2,LCP2,LDLR,TLR4,TNF	16
Hematological System Development and Function,Tissue Morphology	Quantity of mononuclear leukocytes	5.95e-16		1.854	AKAP13,ANPEP,APOE,ARHGDIB,BCL2A1,CCL4,CCND3,CD36,CD44,CFLAR,CTSB,CXCL8,EGR1,ETS2,FABP5,FCER1G,FCGR2A,FLT1,GPR132,GPR183,GSTP1,HIF1A,ICAM1,IL1A,IL1B,IL1RN,IL2RA,INSR,IRAK3,IRF1,ITGB2,LCP2,LDLR,LGALS1,MALT1,N4BP1,NFAT5,NFKB1,NFKBIA,NLRP3,NPC2,PAG1,PELI1,PIK3AP1,PRKCH,PTEN,PTPN2,PYCARD,REL,RHOH,S100A8,S100A9,SAMSN1,STAT3,TET2,THBS1,TLR4,TNF,TNFAIP3,TNIP1,TRAF1,TSPO,TYROBP,ZFP36	64
Hematological System Development and Function,Immune Cell Trafficking,Inflammatory Response,Tissue Development	Accumulation of granulocytes	2.38e-13		1.862	ADGRE5,BCL2A1,BCL6,CCL3,CD44,CXCL2,CXCL3,CXCL8,EGR1,FCGR2A,GRN,IL1B,IL1RN,ITGB2,PIK3AP1,S100A8,S100A9,STAT3,TLR4,TNF	20
Cell Morphology	Polarization of cells	8.46e-11		1.868	ABL2,ANPEP,APOE,AQP9,CCL3,CD36,CFL1,CXCL8,FCER1G,FLT1,HIF1A,IL1A,IL1B,IL1RN,ITGB2,NAMPT,PRKCE,PTEN,REL,SAMSN1,SLAMF1,STAT3,TLR4,TNF	24
Cellular Movement	Chemotaxis	4.93e-18		1.869	ADGRE2,AIF1,APOE,AQP9,CAPG,CCL20,CCL3,CCL3L3,CCL4,CCRL2,CD36,CD44,CD9,CH25H,CST3,CXCL2,CXCL3,CXCL8,DUSP1,DUSP6,FCER1G,FCGR2A,FLT1,FPR1,FPR2,GPR132,GPR183,GRN,HCK,ICAM1,IL1A,IL1B,ITGB2,LDLR,LGALS1,LITAF,MTSS1,PDE4B,PFN1,PTEN,PTGS2,PTPN2,REL,RPS19,S100A4,S100A8,S100A9,SLAMF1,STAT3,STX3,THBS1,TLR4,TMSB10/TMSB4X,TNF,TNFAIP6	55
Cellular Movement,Hematological System Development and Function,Immune Cell Trafficking	Migration of mononuclear leukocytes	5.42e-15		1.869	ACTB,AIF1,APOE,CCL20,CCL3,CCL3L3,CCL4,CD44,CD58,CXCL3,CXCL8,EZR,FABP5,FLT1,GPR132,GPR183,HSP90AA1,ICAM1,IL1A,IL1B,IL2RA,INSR,ITGB2,LCP2,LDLR,LGALS1,MALT1,MAP4K3,NFKB1,NLRP3,PELI1,PFN1,PTEN,PTGS2,PTPN2,PYCARD,S100A4,SERP1,STAT3,THBS1,TLR4,TNF,TNIP1	43
Cell-mediated Immune Response,Cellular Development,Cellular Function and Maintenance,Cellular Growth and Proliferation,Embryonic Development,Hematological System Development and Function,Hematopoiesis,Lymphoid Tissue Structure and Development,Organ Development,Organismal Development,Tissue Development	T cell development	1.57e-11		1.87	ABL2,BCL2A1,BCL6,CCL3,CFLAR,EGR1,EIF4E,ETS2,FCER1G,FCGR2A,FLT1,GADD45B,GPR183,HIF1A,HSP90AA1,ICAM1,IFNGR2,IL1A,IL1B,IL2RA,IRAK3,IRF1,ITGB2,LCP2,LGALS1,MALT1,NFKBIA,NFKBIZ,NLRP3,PAG1,PRKCH,PTEN,PTGS2,PTPN2,REL,RHOH,RPS6,STAT3,TLR4,TNF,TNFAIP3,TYROBP,ZBTB16	43
Cellular Movement,Hematological System Development and Function,Immune Cell Trafficking,Inflammatory Response	Chemotaxis of leukocytes	6.76e-20		1.874	ADGRE2,AIF1,APOE,AQP9,CAPG,CCL20,CCL3,CCL3L3,CCL4,CCRL2,CD9,CH25H,CST3,CXCL2,CXCL3,CXCL8,DUSP1,FCER1G,FCGR2A,FLT1,FPR1,FPR2,GPR183,GRN,HCK,ICAM1,IL1A,IL1B,ITGB2,LDLR,LGALS1,LITAF,PDE4B,PFN1,PTEN,REL,RPS19,S100A4,S100A8,S100A9,SLAMF1,THBS1,TLR4,TMSB10/TMSB4X,TNF,TNFAIP6	46
Cellular Movement,Hematological System Development and Function,Immune Cell Trafficking,Inflammatory Response	Chemotaxis of neutrophils	3.01e-15		1.875	AQP9,CAPG,CCL3,CCL3L3,CCL4,CST3,CXCL2,CXCL3,CXCL8,FCER1G,FCGR2A,FPR1,FPR2,GRN,HCK,ICAM1,IL1B,ITGB2,PDE4B,PTEN,S100A8,S100A9,TLR4,TMSB10/TMSB4X,TNF,TNFAIP6	26
Cellular Movement	Cell tethering or rolling	2.09e-11		1.877	CD14,CD36,CD44,CD63,CXCL2,CXCL3,CXCL8,FCGR2A,FPR2,HCK,ICAM1,IL1B,ITGB2,LCP2,LDLR,TLR4,TNF	17
Free Radical Scavenging	Synthesis of reactive oxygen species	1.4e-17		1.882	ACTB,ADGRE2,APOE,ARHGDIB,CCL3,CCL4,CD14,CD36,CD44,CFLAR,COX4I1,COX5B,CST3,CSTB,CXCL2,CXCL8,CYBA,DBI,DUSP1,FCGR2A,FPR1,FPR2,FTL,GABARAP,GCH1,GPR132,GPX1,GRN,GSTP1,HCK,HIF1A,ICAM1,IL1B,IL1R2,INSR,ITGB2,LCP2,LUCAT1,MACROH2A1,NAMPT,NFE2L2,NFKBIA,NLRP3,PFKFB3,PRKCE,PTEN,PTGS2,PTPN1,PYCARD,RACK1,RPL29,S100A6,S100A8,SELENOT,SOD2,STAT3,TLR4,TNF,TYROBP	59
Cellular Function and Maintenance	Ion homeostasis of cells	5.08e-11		1.883	ABL2,ADM,APOE,ATP1A1,ATP6V1G1,CCL20,CCL3,CCL3L3,CCL4,CD36,CD55,CXCL2,CXCL3,CXCL8,EGR1,ETS2,EZR,FAM20A,FCGR2A,FPR1,FPR2,FTL,GPR132,GPR183,HCK,HIF1A,IL1A,IL1B,ITGB2,KCNJ2,KCNMA1,LCP2,LGALS1,MACROH2A1,MT2A,NFKB1,PAG1,PRKCE,PRKCH,PTEN,SELENOT,SLC1A3,SOD2,TBXAS1,TLR4,TMEM165,TNF	47
Cellular Growth and Proliferation,Tissue Development	Proliferation of epithelial cells	7.67e-11		1.918	AREG,BCL2A1,CCND3,CD44,CD9,CFLAR,CXCL3,CXCL8,EIF4E,EREG,EZR,FLT1,FPR2,GRN,HIF1A,IL1B,IL1RN,INSR,KLF9,MTSS1,NFE2L2,NFKB1,NFKBIA,PRKCH,PTEN,PTGS2,PTPN1,PTPN12,REL,RNF144B,S100A11,S100A8,SAV1,STAT3,SULF2,THBS1,TLR4,TNF,TNFAIP3,TNFAIP6,TNFAIP8,ZFP36	42
Organ Development,Renal and Urological System Development and Function	Growth of renal glomerulus	3.79e-10		1.924	APOE,CD36,DUSP1,FCER1G,FLT1,FPR2,ICAM1,IL1B,IRF1,NLRP3,PRKCE,STAT3,TLR4,TNF	14
Hematological System Development and Function,Immune Cell Trafficking,Inflammatory Response,Tissue Development	Accumulation of leukocytes	1.46e-17		1.939	ADGRE5,APOE,BCL2A1,BCL6,CCL3,CCL3L3,CD44,CXCL2,CXCL3,CXCL8,DUSP1,EGR1,ETS2,FCGR2A,GRN,HCK,HIF1A,ICAM1,IL1B,IL1RN,IL2RA,IRF1,ITGB2,LDLR,NFKB1,PFN1,PIK3AP1,PTEN,PTGS2,PTPN1,S100A8,S100A9,STAT3,THBS1,TLR4,TNF,TYROBP	37
Connective Tissue Disorders,Organismal Injury and Abnormalities,Tissue Morphology	Destruction of connective tissue	9.92e-13		1.957	CFD,CXCL8,EGR1,FCGR2A,FCN1,HIF1A,IL1A,IL1B,IL1RN,NAMPT,NFKBIA,PTGS2,SDC4,SULF2,TLR4,TNF,TNFAIP3,TNFAIP6	18
Cell-To-Cell Signaling and Interaction	Binding of myeloid cells	4.17e-12		1.958	ADGRE2,ADGRE5,APOE,CCL3,CD14,CD44,CD58,CXCL2,CXCL3,CXCL8,FCGR2A,FLT1,FPR1,FPR2,HCK,HIF1A,ICAM1,IL1A,IL1B,ITGB2,LGALS1,PTGS2,S100A8,S100A9,SLC44A2,TLR4,TNF	27
Cell-To-Cell Signaling and Interaction	Binding of blood cells	2.06e-15		1.959	ADGRE2,ADGRE5,APOE,CCL20,CCL3,CCL3L3,CCL4,CD14,CD36,CD44,CD58,CD9,CXCL2,CXCL3,CXCL8,EZR,FCER1G,FCGR2A,FLT1,FPR1,FPR2,GPR132,HCK,HIF1A,HSP90AA1,ICAM1,IL1A,IL1B,ITGB2,LCP2,LGALS1,NFE2L2,NFKBIA,PTGS2,REL,S100A8,S100A9,SDC4,SLC44A2,STXBP2,THBS1,TLR4,TNF,TNIP1,TYROBP	45
Inflammatory Response	Inflammatory response	3.52e-31		1.96	ADGRE2,ADGRE5,ADM,AIF1,APOE,AQP9,BCL2A1,BCL6,BIRC3,CAPG,CCL20,CCL3,CCL3L3,CCL4,CCRL2,CD14,CD36,CD44,CD63,CD9,CH25H,CST3,CTSB,CXCL2,CXCL3,CXCL8,CYBA,DUSP1,EGR1,FCER1G,FCGR2A,FLT1,FPR1,FPR2,GPR183,GPX1,GRN,HCK,ICAM1,IFNGR2,IL1A,IL1B,IL1RN,IL2RA,IRAK3,ITGB2,LDLR,LGALS1,LILRA5,LITAF,MEFV,MT-ND3,NAMPT,NFE2L2,NFKB1,NFKBIA,NFKBIZ,NLRP3,PDE4B,PELI1,PFKFB3,PFN1,PIK3AP1,PPT1,PRKCE,PTEN,PTGS2,PTPN2,PYCARD,R…	91
Cellular Movement,Hematological System Development and Function,Immune Cell Trafficking,Inflammatory Response	Chemotaxis of granulocytes	6.4e-16		1.974	ADGRE2,AQP9,CAPG,CCL3,CCL3L3,CCL4,CST3,CXCL2,CXCL3,CXCL8,FCER1G,FCGR2A,FPR1,FPR2,GRN,HCK,ICAM1,IL1B,ITGB2,LGALS1,PDE4B,PTEN,RPS19,S100A8,S100A9,TLR4,TMSB10/TMSB4X,TNF,TNFAIP6	29
Cellular Development,Cellular Growth and Proliferation,Hematological System Development and Function,Humoral Immune Response,Lymphoid Tissue Structure and Development	Proliferation of B lymphocytes	1.46e-11		1.976	ARHGDIB,BCL2A1,BCL6,CCND3,CD14,CD44,EZR,FTL,GPR183,HCK,HIF1A,IL1B,IL1RN,KLF9,MALT1,MNDA,NFKB1,NFKBIA,PELI1,PIK3AP1,PTEN,PTPN2,REL,SAMSN1,SLAMF1,TLR4,TNF,TNFAIP3,TYROBP,ZBTB16	30
Cellular Movement,Immune Cell Trafficking	Cell movement of lymphatic system cells	1.94e-16		1.983	ACTB,AIF1,APOE,CCL20,CCL3,CCL3L3,CCL4,CD44,CD58,CD9,CH25H,CXCL3,CXCL8,EZR,FABP5,GPR132,GPR183,HIF1A,HSP90AA1,ICAM1,IL1A,IL1B,IL2RA,INSR,ITGB2,LCP2,LDLR,LGALS1,MALT1,MAP4K3,NFKB1,NFKBIA,NLRP3,PELI1,PFN1,PTEN,PTGS2,PTPN2,PYCARD,S100A4,SAMSN1,SERP1,STAT3,THBS1,TLR4,TNF,TNIP1	47
Tissue Development	Accumulation of cells	3.68e-16		1.983	ADGRE5,APOE,BCL2A1,BCL6,CCL3,CCL3L3,CD44,CXCL2,CXCL3,CXCL8,DUSP1,EGR1,ETS2,FCGR2A,FLT1,GRN,HCK,HIF1A,ICAM1,IL1B,IL1RN,IL2RA,IRF1,ITGB2,LDLR,NFKB1,NLRP3,PFN1,PIK3AP1,PTEN,PTGS2,PTPN1,S100A8,S100A9,STAT3,THBS1,TLR4,TNF,TYROBP,ZBTB16	40
Cell Death and Survival	Cell viability	2.15e-18		1.99	ABL2,ADGRE2,ADM,AKAP13,ALDOA,APOE,AREG,ARPC2,ATF6,BACH1,BCL2A1,BCL6,BTG2,CCL3,CCL4,CCND3,CD44,CD9,CFLAR,CST3,CTSB,CXCL2,CXCL3,CXCL8,CYBA,DENND4A,DUSP1,DUSP6,EEF1B2,EGR1,EIF4E,ELOB,EREG,ETS2,EZR,FCER1G,FKBP5,FLT1,GADD45B,GCH1,GMFG,GPX1,GSTP1,HCK,HELB,HIF1A,HIPK2,HSPA8,ICAM1,IL1A,IL1B,IL1RN,INPP5A,INSR,ITGB2,KDM6B,KLF6,LIMK2,LUCAT1,MACROH2A1,MALT1,MAP1LC3B,MTSS1,NAMPT,NFAT5,NFE2L2,NFKB1,NFKBIA,PFDN…	105
Cell Death and Survival	Cell survival	1.1e-18		1.995	ABL2,ADGRE2,ADM,AKAP13,ALDOA,APOE,AREG,ARPC2,ATF6,BACH1,BCL2A1,BCL6,BTG2,CCL3,CCL4,CCND3,CD44,CD9,CFLAR,CST3,CTSB,CXCL2,CXCL3,CXCL8,CYBA,DENND4A,DUSP1,DUSP6,EEF1B2,EGR1,EIF4E,ELOB,EREG,ETS2,EZR,FCER1G,FKBP5,FLT1,FTL,GADD45B,GCH1,GMFG,GPX1,GSTP1,HCK,HELB,HIF1A,HIPK2,HSPA8,ICAM1,IL1A,IL1B,IL1RN,INPP5A,INSR,IRAK3,ITGB2,KDM6B,KLF6,LIMK2,LUCAT1,MACROH2A1,MALT1,MAP1LC3B,MEFV,MTSS1,NAMPT,NFAT5,NFE2L2,NF…	109
Free Radical Scavenging	Metabolism of reactive oxygen species	2.84e-17		1.997	ACTB,ADGRE2,APOE,ARHGDIB,CCL3,CCL4,CD14,CD36,CD44,CFLAR,COX4I1,COX5B,CST3,CSTB,CXCL2,CXCL8,CYBA,DBI,DUSP1,FCGR2A,FPR1,FPR2,FTL,GABARAP,GCH1,GPR132,GPX1,GRN,GSTP1,HCK,HIF1A,ICAM1,IL1B,IL1R2,INSR,ITGB2,LCP2,LUCAT1,MACROH2A1,NAMPT,NFE2L2,NFKBIA,NLRP3,PFKFB3,PMAIP1,PRKCE,PTEN,PTGS2,PTPN1,PYCARD,RACK1,RPL29,S100A6,S100A8,SELENOT,SOD2,STAT3,TLR4,TNF,TYROBP	60
Hematological System Development and Function,Tissue Development	Accumulation of blood cells	6.55e-18	Increased	2.002	ADGRE5,APOE,BCL2A1,BCL6,CCL3,CCL3L3,CD44,CXCL2,CXCL3,CXCL8,DUSP1,EGR1,ETS2,FCGR2A,GRN,HCK,HIF1A,ICAM1,IL1B,IL1RN,IL2RA,IRF1,ITGB2,LDLR,NFKB1,NLRP3,PFN1,PIK3AP1,PTEN,PTGS2,PTPN1,S100A8,S100A9,STAT3,THBS1,TLR4,TNF,TYROBP,ZBTB16	39
Lipid Metabolism,Small Molecule Biochemistry	Synthesis of prostaglandin	5.99e-11	Increased	2.002	APOE,AREG,CD14,CD36,CXCL8,EREG,FABP5,FCER1G,FCGR2A,HIF1A,IL1A,IL1B,IL1R2,IL1RN,LDLR,NFE2L2,NFKB1,NFKBIA,NPC2,PTGS2,STAT3,TBXAS1,TLR4,TNF	24
Lipid Metabolism,Small Molecule Biochemistry	Metabolism of prostaglandin	3.25e-11	Increased	2.003	APOE,AREG,CD14,CD36,CXCL8,EREG,FABP5,FCER1G,FCGR2A,GSTP1,HIF1A,IL1A,IL1B,IL1R2,IL1RN,LDLR,NFE2L2,NFKB1,NFKBIA,NPC2,PTGS2,STAT3,TBXAS1,TLR4,TNF	25
Cellular Movement,Hematological System Development and Function,Immune Cell Trafficking	Homing of leukocytes	1.63e-20	Increased	2.016	ADGRE2,AIF1,APOE,AQP9,CAPG,CCL20,CCL3,CCL3L3,CCL4,CCRL2,CD44,CD9,CH25H,CST3,CXCL2,CXCL3,CXCL8,DUSP1,FCER1G,FCGR2A,FLT1,FPR1,FPR2,GPR183,GRN,HCK,ICAM1,IL1A,IL1B,ITGB2,LDLR,LGALS1,LITAF,PDE4B,PFN1,PTEN,REL,RPS19,S100A4,S100A8,S100A9,SLAMF1,STAT3,THBS1,TLR4,TMSB10/TMSB4X,TNF,TNFAIP6	48
Free Radical Scavenging	Production of reactive oxygen species	4.66e-14	Increased	2.018	ACTB,ADGRE2,APOE,ARHGDIB,CCL3,CCL4,CD14,CD36,CD44,COX4I1,CST3,CXCL2,CXCL8,CYBA,DBI,FCGR2A,FPR1,FPR2,FTL,GCH1,GPX1,GRN,HCK,HIF1A,ICAM1,IL1B,INSR,ITGB2,LCP2,LUCAT1,NFE2L2,NFKBIA,NLRP3,PFKFB3,PRKCE,PTEN,PTGS2,RACK1,S100A6,S100A8,SELENOT,SOD2,TLR4,TNF,TYROBP	45
Cell-To-Cell Signaling and Interaction	Adhesion of blood cells	1.28e-16	Increased	2.032	ADGRE2,ADGRE5,APOE,CCL20,CCL3,CCL3L3,CCL4,CD14,CD36,CD44,CD58,CD9,CXCL2,CXCL3,CXCL8,EZR,FCER1G,FCGR2A,FLT1,FPR1,FPR2,GPR132,HCK,HIF1A,HSP90AA1,ICAM1,IL1A,IL1B,ITGB2,LCP2,LGALS1,NFKBIA,PTGS2,REL,S100A8,S100A9,SDC4,SLC44A2,STXBP2,THBS1,TLR4,TNF,TNIP1,TYROBP	44
Cell-To-Cell Signaling and Interaction	Response of myeloid cells	7.91e-16	Increased	2.037	ADGRE2,ANPEP,ATP1A1,CAPG,CCL3,CD14,CD36,CD44,CD9,CH25H,CLIC4,CXCL3,CXCL8,EIF4E,FCER1G,FCGR2A,FCN1,FPR1,GRN,HCK,HIF1A,ICAM1,IL1B,ITGB2,NFE2L2,PFKFB3,PRKCE,PTEN,S100A9,STAT3,THBS1,TLR4,TNF,TYROBP	34
Cellular Movement,Hematological System Development and Function,Immune Cell Trafficking	Lymphocyte migration	1.83e-15	Increased	2.051	ACTB,AIF1,APOE,CCL20,CCL3,CCL3L3,CCL4,CD44,CD58,CXCL3,CXCL8,EZR,FABP5,GPR132,GPR183,HSP90AA1,ICAM1,IL1A,IL1B,IL2RA,INSR,ITGB2,LCP2,LDLR,LGALS1,MALT1,MAP4K3,NFKB1,NLRP3,PELI1,PFN1,PTEN,PTGS2,PTPN2,PYCARD,S100A4,SERP1,STAT3,THBS1,TLR4,TNF,TNIP1	42
Cell Morphology	Orientation of cells	3.48e-11	Increased	2.07	ABL2,ANPEP,APOE,AQP9,CCL3,CD36,CFL1,CXCL8,FCER1G,FLT1,HIF1A,IL1A,IL1B,IL1RN,ITGB2,NAMPT,PRKCE,PTEN,REL,SAMSN1,SDC4,SLAMF1,STAT3,TLR4,TNF	25
Cellular Assembly and Organization,Tissue Development	Formation of filaments	9.38e-11	Increased	2.07	ABL2,ACTG1,AIF1,AKAP13,APOE,ARPC2,CD44,CFL1,CTSB,CXCL8,DYNLL1,FCGR2A,FMN1,GAS7,GNG2,HCK,ICAM1,IL1A,IL1B,INPP5A,LIMK2,MTSS1,PFDN5,PFN1,PKP2,PRKCE,PRKCH,PTEN,PTGS2,PYCARD,RPS3,SDC4,SFTPC,SNX9,STAT3,THBS1,TNF	37
Cell-To-Cell Signaling and Interaction,Hematological System Development and Function,Immune Cell Trafficking,Inflammatory Response	Activation of leukocytes	1.91e-19	Increased	2.078	APOE,BCL6,CCL20,CCL3,CCL4,CD14,CD36,CD44,CD55,CD58,CD63,CST3,CXCL3,CXCL8,DUSP1,FCER1G,FCGR2A,FPR1,FPR2,GRN,HCK,HIF1A,ICAM1,IFNGR2,IL1A,IL1B,IL1RN,IL2RA,IRAK3,IRF1,ITGB2,LCP2,LDLR,LGALS1,MALT1,MT-ND3,NAMPT,NFE2L2,NFKB1,NFKBIA,NFKBIZ,NLRP3,PAG1,PELI1,PFKFB3,PPT1,PRKCE,PTEN,PTGS2,PYCARD,REL,RHOH,RPS3,S100A8,S100A9,SAMSN1,SERPINB9,SLAMF1,STAT3,STX11,STXBP2,THBS1,TLR4,TNF,TNFAIP3,TRAF1,TYROBP,VAMP8	68
Cellular Movement,Hematological System Development and Function,Immune Cell Trafficking,Inflammatory Response	Chemotaxis of antigen presenting cells	1.44e-13	Increased	2.152	APOE,CCL20,CCL3,CCL3L3,CCL4,CCRL2,FLT1,FPR1,FPR2,GPR183,HCK,ICAM1,IL1A,IL1B,LDLR,LITAF,PFN1,REL,RPS19,S100A4,SLAMF1,THBS1,TLR4,TNF	24
Connective Tissue Disorders,Organismal Injury and Abnormalities,Skeletal and Muscular Disorders,Tissue Morphology	Damage of cartilage tissue	8.42e-12	Increased	2.16	CFD,CXCL8,EGR1,FCGR2A,FCN1,HIF1A,IL1A,IL1B,IL1RN,NAMPT,PTGS2,SDC4,SULF2,TLR4,TNF,TNFAIP3,TNFAIP6	17
Lymphoid Tissue Structure and Development,Tissue Morphology	Quantity of lymphatic system cells	1.03e-17	Increased	2.164	AKAP13,ANPEP,APOE,ARHGDIB,BCL2A1,BCL6,CCL4,CCND3,CD36,CD44,CD9,CFLAR,CTSB,EGR1,ETS2,FABP5,FCER1G,FCGR2A,FLT1,GPR132,GPR183,GSTP1,HCK,HIF1A,ICAM1,IL1A,IL1B,IL1RN,IL2RA,INSR,IRAK3,IRF1,ITGB2,LCP2,LDLR,LGALS1,MALT1,N4BP1,NFAT5,NFKB1,NFKBIA,NLRP3,NPC2,PAG1,PELI1,PIK3AP1,PRKCH,PTEN,PTPN2,PYCARD,RAPGEF2,REL,RHOH,S100A8,S100A9,SAMSN1,SOD2,STAT3,TET2,THBS1,TLR4,TNF,TNFAIP3,TNIP1,TRAF1,TSPO,TYROBP,ZFP36	68
Cellular Movement,Hematological System Development and Function,Immune Cell Trafficking	Cell movement of lymphocytes	3.14e-16	Increased	2.165	ACTB,AIF1,APOE,CCL20,CCL3,CCL3L3,CCL4,CD44,CD58,CH25H,CXCL3,CXCL8,EZR,FABP5,GPR132,GPR183,HIF1A,HSP90AA1,ICAM1,IL1A,IL1B,IL2RA,INSR,ITGB2,LCP2,LDLR,LGALS1,MALT1,MAP4K3,NFKB1,NFKBIA,NLRP3,PELI1,PFN1,PTEN,PTGS2,PTPN2,PYCARD,S100A4,SAMSN1,SERP1,STAT3,THBS1,TLR4,TNF,TNIP1	46
Cellular Development,Cellular Growth and Proliferation,Hematological System Development and Function,Lymphoid Tissue Structure and Development	Proliferation of lymphocytes	1.02e-25	Increased	2.169	AIF1,AKAP13,APOE,ARHGDIB,BCL2A1,BCL6,BIRC3,CCL4,CCND3,CD14,CD36,CD44,CD55,CD58,CFLAR,CXCL8,DUSP1,EGR1,EHD1,EIF4E,ELOB,ETS2,EZR,FCER1G,FCGR2A,FTL,GADD45B,GCH1,GPR183,HCK,HIF1A,HSPA8,ICAM1,IL1A,IL1B,IL1RN,IL2RA,INSR,IRF1,ISG20,ITGB2,KLF9,LCP2,LGALS1,MALT1,MNDA,NDUFB10,NFAT5,NFE2L2,NFKB1,NFKBIA,PAG1,PELI1,PIK3AP1,PMAIP1,PRKCE,PRKCH,PTEN,PTGS2,PTPN2,PYCARD,REL,RHOH,RPS3,SAMSN1,SCGB1A1,SDC4,SERPINB9,S…	77
Cellular Movement	Chemotaxis of myeloid cells	1.34e-20	Increased	2.188	ADGRE2,AIF1,APOE,AQP9,CAPG,CCL20,CCL3,CCL3L3,CCL4,CD9,CST3,CXCL2,CXCL3,CXCL8,DUSP1,FCER1G,FCGR2A,FLT1,FPR1,FPR2,GRN,HCK,ICAM1,IL1B,ITGB2,LDLR,LGALS1,LITAF,PDE4B,PFN1,PTEN,REL,RPS19,S100A4,S100A8,S100A9,SLAMF1,THBS1,TLR4,TMSB10/TMSB4X,TNF,TNFAIP6	42
Cell-To-Cell Signaling and Interaction,Hematological System Development and Function,Immune Cell Trafficking,Inflammatory Response	Activation of neutrophils	2.91e-10	Increased	2.204	CCL3,CCL4,CD14,CD63,CST3,CXCL3,CXCL8,FPR1,FPR2,GRN,IL1A,IL1B,IL1RN,ITGB2,MT-ND3,TNF	16
Tissue Morphology	Quantity of cells	1.79e-19	Increased	2.207	ABL2,ADGRE5,ADM,AKAP13,ALDH1A2,ANPEP,APOE,ARHGDIB,ARPC2,BCL2A1,BCL6,BIRC3,CCL20,CCL3,CCL3L3,CCL4,CCND3,CD36,CD44,CD63,CD9,CFLAR,CLIC4,CTSB,CXCL2,CXCL8,DENND4A,DUSP1,DUSP6,DYNLL1,EGR1,ETS2,FABP5,FCER1G,FCGR2A,FLT1,FPR1,FPR2,GPR132,GPR183,GPX1,GRN,GSTP1,HCK,HIF1A,HIPK2,ICAM1,IL1A,IL1B,IL1RAPL1,IL1RN,IL2RA,INSR,IRAK3,IRF1,ITGB2,KDM6B,KLF6,KLF7,LCP2,LDLR,LGALS1,LITAF,MACROH2A1,MALT1,MT2A,N4BP1,NACA,N…	121
Cellular Assembly and Organization,Tissue Development	Fibrogenesis	1.71e-11	Increased	2.209	ABL2,ACTG1,AIF1,AKAP13,APOE,ARPC2,CD14,CD44,CFL1,CTSB,CXCL8,DYNLL1,FCGR2A,FMN1,GAS7,GNG2,HCK,HIF1A,ICAM1,IL1A,IL1B,INPP5A,LIMK2,MTSS1,PFDN5,PFN1,PKP2,PRKCE,PRKCH,PTEN,PTGS2,PYCARD,REL,RPS3,SDC4,SFTPC,SNX9,STAT3,THBS1,TLR4,TNF	41
Cellular Function and Maintenance,Hematological System Development and Function	Function of myeloid cells	1.33e-19	Increased	2.219	ANPEP,APOE,BIRC3,CAPG,CD14,CD36,CD9,CXCL8,EGR1,FCER1G,FCGR2A,GRN,HCK,ICAM1,IL1B,IRAK2,IRF1,N4BP1,NFKB1,NFKBIA,NLRP3,PTGS2,PYCARD,REL,S100A4,SGMS2,SLAMF1,STAT3,TLR4,TNF,TYROBP,ZFP36	32
Cell-To-Cell Signaling and Interaction	Activation of cells	2.75e-19	Increased	2.249	APOE,AREG,ATF6,BCL2A1,BCL6,CCL20,CCL3,CCL3L3,CCL4,CD14,CD36,CD44,CD55,CD58,CD63,CD9,CFL1,CHST11,CST3,CXCL2,CXCL3,CXCL8,DUSP1,FCER1G,FCGR2A,FPR1,FPR2,GPX1,GRN,HCK,HIF1A,ICAM1,IFNGR2,IL1A,IL1B,IL1RN,IL2RA,INSR,IRAK3,IRF1,ITGB2,KCNJ2,KCNMA1,LCP2,LDLR,LGALS1,LILRA5,MALT1,MT-ND3,NAMPT,NFE2L2,NFKB1,NFKBIA,NFKBIZ,NLRP3,NPC2,PAG1,PELI1,PFKFB3,PLEK,PPT1,PRKCE,PTEN,PTGS2,PYCARD,REL,RHOH,RPS3,S100A8,S100A9,…	84
Cell-To-Cell Signaling and Interaction,Hematological System Development and Function,Inflammatory Response	Binding of professional phagocytic cells	2.28e-10	Increased	2.252	ADGRE2,APOE,CCL3,CD14,CD44,CD58,CXCL2,CXCL3,CXCL8,FCGR2A,FLT1,FPR1,HCK,HIF1A,ICAM1,IL1A,IL1B,ITGB2,PTGS2,S100A8,S100A9,SLC44A2,TLR4,TNF	24
Cancer,Cell Death and Survival,Organismal Injury and Abnormalities,Tumor Morphology	Cell death of tumor cells	5.01e-20	Increased	2.256	ANPEP,BIRC3,CCND3,CD14,CD44,CFLAR,CTSB,CXCL8,FLT1,GCH1,HIF1A,HIPK2,IL1A,IL1B,INSR,IRF1,LGALS1,MALT1,NAMPT,NFE2L2,NFKB1,NFKBIA,PMAIP1,PRKCE,PSMA7,PTEN,PTGS2,RACK1,REL,RPL11,RPL13,RPL19,RPL27,RPL27A,RPL3,RPL35A,RPL7,RPL7A,RPS13,RPS14,RPS18,RPS19,RPS3,RPS4Y1,RPS5,SERPINB9,STAT3,TLR4,TNF,YBX1,ZFP36	51
Cancer,Cell Death and Survival,Organismal Injury and Abnormalities,Tumor Morphology	Necrosis of tumor	2.39e-20	Increased	2.263	ANPEP,BIRC3,CCND3,CD14,CD44,CFLAR,CTSB,CXCL8,FLT1,GCH1,HIF1A,HIPK2,IL1A,IL1B,INSR,IRF1,LGALS1,MALT1,NAMPT,NFE2L2,NFKB1,NFKBIA,PMAIP1,PRKCE,PSMA7,PTEN,PTGS2,RACK1,REL,RPL11,RPL13,RPL19,RPL27,RPL27A,RPL3,RPL35A,RPL7,RPL7A,RPS13,RPS14,RPS18,RPS19,RPS3,RPS4Y1,RPS5,SERPINB9,STAT3,THBS1,TLR4,TNF,YBX1,ZFP36	52
Lipid Metabolism,Small Molecule Biochemistry	Synthesis of fatty acid	1.14e-11	Increased	2.305	ACSL1,APOC1,APOE,AREG,CCL3L3,CD14,CD36,CXCL3,CXCL8,EGR1,EREG,FABP5,FCER1G,FCGR2A,FPR1,HIF1A,IL1A,IL1B,IL1R2,IL1RN,LDLR,LTA4H,MGST3,NFE2L2,NFKB1,NFKBIA,NPC2,PPT1,PTGS2,SLC1A3,SLC27A4,STAT3,TBXAS1,TLR4,TNF	35
Connective Tissue Disorders,Organismal Injury and Abnormalities	Damage of connective tissue	1.64e-11	Increased	2.314	APOE,CFD,CXCL8,EGR1,FCGR2A,FCN1,HIF1A,IL1A,IL1B,IL1RN,NAMPT,PTGS2,SDC4,SULF2,TLR4,TNF,TNFAIP3,TNFAIP6	18
Cell-To-Cell Signaling and Interaction,Hematological System Development and Function	Activation of blood cells	2.85e-18	Increased	2.321	APOE,BCL6,CCL20,CCL3,CCL4,CD14,CD36,CD44,CD55,CD58,CD63,CST3,CXCL3,CXCL8,DUSP1,FCER1G,FCGR2A,FPR1,FPR2,GRN,HCK,HIF1A,ICAM1,IFNGR2,IL1A,IL1B,IL1RN,IL2RA,IRAK3,IRF1,ITGB2,LCP2,LDLR,LGALS1,MALT1,MT-ND3,NAMPT,NFE2L2,NFKB1,NFKBIA,NFKBIZ,NLRP3,PAG1,PELI1,PFKFB3,PLEK,PPT1,PRKCE,PTEN,PTGS2,PYCARD,REL,RHOH,RPS3,S100A8,S100A9,SAMSN1,SERPINB9,SLAMF1,STAT3,STX11,STXBP2,THBS1,TLR4,TNF,TNFAIP3,TRAF1,TYROBP,VAM…	69
Cell-To-Cell Signaling and Interaction,Cellular Movement,Hematological System Development and Function,Immune Cell Trafficking,Inflammatory Response	Recruitment of neutrophils	1.24e-15	Increased	2.335	APOE,CCL20,CCL3,CCL3L3,CCL4,CCRL2,CD14,CD44,CD55,CXCL2,CXCL3,CXCL8,FCGR2A,FPR2,HCK,ICAM1,IL1A,IL1B,IL1RN,ITGB2,NFE2L2,NLRP3,PDE4B,PTEN,PYCARD,S100A8,SOD2,TLR4,TNF	29
Cell-To-Cell Signaling and Interaction,Hematological System Development and Function,Immune Cell Trafficking	Adhesion of immune cells	3.28e-17	Increased	2.355	ADGRE2,ADGRE5,APOE,CCL20,CCL3,CCL3L3,CCL4,CD14,CD36,CD44,CD58,CD9,CXCL2,CXCL3,CXCL8,EZR,FCGR2A,FLT1,FPR1,FPR2,GPR132,HCK,HIF1A,HSP90AA1,ICAM1,IL1A,IL1B,ITGB2,LCP2,LGALS1,NFKBIA,PTGS2,REL,S100A8,S100A9,SDC4,SLC44A2,STXBP2,THBS1,TLR4,TNF,TNIP1,TYROBP	43
Connective Tissue Development and Function,Tissue Development	Growth of connective tissue	7.96e-12	Increased	2.36	ACTB,ADM,AIF1,ANPEP,AREG,CCND3,CD44,CTSB,CXCL3,CXCL8,DUSP1,EREG,FTL,GRN,GSTP1,HIF1A,HIPK2,IL1A,IL1B,IL2RA,INSR,KCNMA1,KLF9,LGALS1,NFE2L2,NFKB1,NFKBIA,PFKFB3,PRKCH,PTEN,PTGS2,PTPN1,PTPN2,REL,RNF144B,S100A11,S100A4,S100A6,S100A8,S100A9,SDC4,SOD2,STAT3,SULF2,TALDO1,TLR4,TNF,TNFAIP8,TYROBP,YBX1,ZFP36	51
Inflammatory Response	Fever	1.12e-10	Increased	2.374	CCL3,CCL3L3,CCL4,CD14,CXCL8,IL1A,IL1B,IL1RN,MEFV,PTGS2,STAT3,TNF,TUBA1A	13
Cell-To-Cell Signaling and Interaction,Hematological System Development and Function,Inflammatory Response	Immune response of neutrophils	8.77e-12	Increased	2.396	ANPEP,CD36,CD44,CXCL3,CXCL8,FCER1G,FCGR2A,FPR1,HCK,ICAM1,ITGB2,STAT3,THBS1,TLR4,TNF,TYROBP	16
Lipid Metabolism,Small Molecule Biochemistry	Metabolism of eicosanoid	4.8e-12	Increased	2.404	APOE,AREG,CCL3L3,CD14,CD36,CXCL3,CXCL8,EREG,FABP5,FCER1G,FCGR2A,FPR1,GPX1,GSTP1,HIF1A,IL1A,IL1B,IL1R2,IL1RN,LDLR,LTA4H,MGST3,NFE2L2,NFKB1,NFKBIA,NPC2,PTGS2,STAT3,TBXAS1,TLR4,TNF	31
Lipid Metabolism,Small Molecule Biochemistry	Synthesis of eicosanoid	6.05e-12	Increased	2.404	APOE,AREG,CCL3L3,CD14,CD36,CXCL3,CXCL8,EREG,FABP5,FCER1G,FCGR2A,FPR1,HIF1A,IL1A,IL1B,IL1R2,IL1RN,LDLR,LTA4H,MGST3,NFE2L2,NFKB1,NFKBIA,NPC2,PTGS2,STAT3,TBXAS1,TLR4,TNF	29
Cell-To-Cell Signaling and Interaction,Cellular Movement,Hematological System Development and Function,Immune Cell Trafficking,Inflammatory Response	Recruitment of macrophages	2.09e-13	Increased	2.452	APOE,CCL3,CCL4,CD36,CD44,CXCL8,FLT1,HCK,ICAM1,IL1B,IL1RN,ITGB2,LGALS1,NFE2L2,NFKB1,NFKBIA,S100A4,THBS1,TLR4,TNF	20
Cell-To-Cell Signaling and Interaction,Cellular Movement,Hematological System Development and Function,Immune Cell Trafficking	Recruitment of antigen presenting cells	2.81e-17	Increased	2.472	APOE,CCL20,CCL3,CCL3L3,CCL4,CD36,CD44,CXCL3,CXCL8,FLT1,FPR2,HCK,ICAM1,IL1B,IL1RN,ITGB2,LAMTOR2,LGALS1,NFE2L2,NFKB1,NFKBIA,S100A4,THBS1,TLR4,TNF	25
Gene Expression	Transcription	3.34e-10	Increased	2.473	ACTG1,AIF1,AKAP13,ALDH1A2,APOE,ATF6,BACH1,BCL6,BTG2,CCL3,CCL3L3,CCND3,CD36,CD44,CD55,CD9,CFLAR,CXCL3,CXCL8,DUSP1,EDF1,EGR1,ELL2,ELOB,EREG,ETS2,EZR,FCGR2A,GABPB1,GBP2,GNG2,GPR183,GPX1,GRN,GSTP1,H2AZ1,HELB,HIF1A,HIPK2,HNRNPC,HSPA8,IL1A,IL1B,IL1RN,INSR,IRF1,KDM6B,KLF6,KLF7,KLF9,LCOR,LCP2,LDLR,LGALS1,LITAF,MACROH2A1,MAFF,MALT1,NAMPT,NFAT5,NFE2L2,NFKB1,NFKBIA,NFKBIZ,NLRP3,PFDN5,PFN1,PLK3,PPP1R15A,PRKC…	99
Cellular Development,Cellular Growth and Proliferation,Connective Tissue Development and Function,Skeletal and Muscular System Development and Function,Tissue Development	Osteoclastogenesis	1.03e-11	Increased	2.483	ADM,BCL6,CCL3,CCL3L3,CD44,CD9,COX4I1,CST3,CXCL3,CXCL8,GPR183,ICAM1,IL1A,IL1B,IL1RN,LDLR,NFKB1,NFKBIA,PTGS2,S100A8,STAT3,TNF,TNFAIP3	23
Gene Expression	Expression of RNA	9.72e-13	Increased	2.488	ACTG1,AIF1,ALDH1A2,APOE,ATF6,BACH1,BCL6,BTG2,CCL3,CCL3L3,CCND3,CD36,CD44,CD9,CFLAR,CXCL3,CXCL8,DUSP1,EDF1,EGR1,EIF1,EIF4E,ELL2,ELOB,EREG,ETS2,EZR,FCGR2A,FPR2,GABPB1,GBP2,GNG2,GPR183,GPX1,GRN,GSTP1,H2AZ1,HELB,HIF1A,HIPK2,HNRNPC,HSPA8,IL1A,IL1B,INSR,IRAK2,IRF1,ISG20,KDM6B,KLF6,KLF7,KLF9,LCOR,LCP2,LDLR,LGALS1,LITAF,MACROH2A1,MAFF,MALT1,NAMPT,NFAT5,NFE2L2,NFKB1,NFKBIA,NFKBIZ,NLRP3,PFDN5,PFN1,PLK3,PPP…	111
Cell-To-Cell Signaling and Interaction,Cellular Movement,Hematological System Development and Function,Immune Cell Trafficking	Recruitment of mononuclear leukocytes	1.19e-12	Increased	2.511	APOE,CCL20,CCL3,CCL4,CD44,CD55,CXCL3,CXCL8,FABP5,FPR2,GPR132,HCK,ICAM1,IL1B,NFKB1,NLRP3,PELI1,PTPN2,PYCARD,STAT3,TNF	21
Cellular Movement,Skeletal and Muscular System Development and Function	Cell movement of smooth muscle cells	2.54e-13	Increased	2.524	ADM,AIF1,APOE,CCL3,CD44,CLIC4,CXCL2,CXCL3,CXCL8,DUSP1,EGR1,FLT1,HIF1A,LDLR,NAMPT,NFAT5,NFE2L2,PTGS2,PTPN1,S100A4,SDC4,STAT3,THBS1,TLR4,TNF	25
Cellular Movement	Cell movement of muscle cells	3.6e-13	Increased	2.524	ADM,AIF1,APOE,CCL3,CD44,CLIC4,CXCL2,CXCL3,CXCL8,DUSP1,EGR1,FLT1,HIF1A,LDLR,NACA,NAMPT,NFAT5,NFE2L2,PTGS2,PTPN1,S100A4,SDC4,STAT3,THBS1,TLR4,TNF	26
Cellular Growth and Proliferation,Connective Tissue Development and Function,Tissue Development	Proliferation of connective tissue cells	3.88e-10	Increased	2.575	ACTB,ADM,AIF1,AREG,CCND3,CD44,CTSB,CXCL3,CXCL8,DUSP1,EREG,GRN,GSTP1,HIF1A,IL1A,IL1B,INSR,KCNMA1,KLF9,LGALS1,NFE2L2,NFKB1,NFKBIA,PFKFB3,PRKCH,PTEN,PTGS2,PTPN1,PTPN2,REL,RNF144B,S100A11,S100A4,S100A6,S100A8,S100A9,SDC4,SOD2,STAT3,SULF2,TLR4,TNF,TNFAIP8,YBX1,ZFP36	45
Cellular Movement,Skeletal and Muscular System Development and Function	Migration of muscle cells	2.04e-12	Increased	2.607	ADM,AIF1,APOE,CD44,CLIC4,CXCL2,CXCL3,CXCL8,DUSP1,EGR1,FLT1,HIF1A,LDLR,NACA,NAMPT,NFAT5,NFE2L2,PTGS2,S100A4,SDC4,STAT3,THBS1,TLR4,TNF	24
Cellular Movement,Skeletal and Muscular System Development and Function	Migration of smooth muscle cells	2.19e-12	Increased	2.607	ADM,AIF1,APOE,CD44,CLIC4,CXCL2,CXCL3,CXCL8,DUSP1,EGR1,FLT1,HIF1A,LDLR,NAMPT,NFAT5,NFE2L2,PTGS2,S100A4,SDC4,STAT3,THBS1,TLR4,TNF	23
Cellular Function and Maintenance	Cellular homeostasis	2.57e-20	Increased	2.611	ABL2,ACSL1,ADM,ALDOA,APOE,ATF6,ATP1A1,ATP6V1G1,BCL2A1,BCL6,CCL20,CCL3,CCL3L3,CCL4,CD36,CD55,CFLAR,CLIC4,CSMD1,CSTB,CTSB,CXCL2,CXCL3,CXCL8,DLGAP1,EGR1,EIF4E,ETS2,EZR,FABP5,FAM20A,FCER1G,FCGR2A,FLT1,FPR1,FPR2,FTL,GABARAP,GADD45B,GK,GPR132,GPR183,GRN,HCK,HIF1A,HSP90AA1,HSPA8,ICAM1,IFNGR2,IL1A,IL1B,IL1RN,IL2RA,INSR,IRAK3,IRF1,ITGB2,KCNJ2,KCNMA1,KLF7,LCP2,LDLR,LGALS1,MACROH2A1,MALT1,MAP1LC3B,MEFV,MRPL…	116
Cell-To-Cell Signaling and Interaction,Cellular Movement,Hematological System Development and Function,Immune Cell Trafficking	Recruitment of granulocytes	4.47e-19	Increased	2.646	ADGRE5,APOE,CCL20,CCL3,CCL3L3,CCL4,CCRL2,CD14,CD44,CD55,CXCL2,CXCL3,CXCL8,FCGR2A,FPR2,GPR132,HCK,ICAM1,IL1A,IL1B,IL1RN,ITGB2,KDM6B,LGALS1,NFE2L2,NLRP3,PDE4B,PTEN,PYCARD,S100A8,SOD2,STAT3,THBS1,TLR4,TNF	35
Cell-To-Cell Signaling and Interaction	Response of myeloid leukocytes	8.38e-15	Increased	2.653	ADGRE2,ANPEP,CCL3,CD14,CD36,CD44,CD9,CXCL3,CXCL8,FCER1G,FCGR2A,FPR1,GRN,HCK,ICAM1,IL1B,ITGB2,S100A9,STAT3,THBS1,TLR4,TNF,TYROBP	23
Cellular Movement,Hematological System Development and Function	Mobilization of blood cells	5.29e-11	Increased	2.686	CCL20,CCL3,CCL3L3,CCL4,CXCL2,CXCL3,CXCL8,FPR1,IL1B,ITGB2,PFN1,PTEN,STAT3,TNF	14
Cell-To-Cell Signaling and Interaction,Hematological System Development and Function,Immune Cell Trafficking,Inflammatory Response	Activation of macrophages	1.27e-10	Increased	2.732	APOE,CCL3,CCL4,CD14,CD36,CD44,CXCL8,FCER1G,FPR2,GRN,HCK,ICAM1,IFNGR2,IL1B,IL1RN,ITGB2,NAMPT,PELI1,PFKFB3,PPT1,PRKCE,PTGS2,S100A9,STAT3,THBS1,TLR4,TNF,TYROBP	28
Cell-To-Cell Signaling and Interaction,Hematological System Development and Function,Inflammatory Response	Response of neutrophils	2.26e-13	Increased	2.737	ADGRE2,ANPEP,CCL3,CD36,CD44,CXCL3,CXCL8,FCER1G,FCGR2A,FPR1,HCK,ICAM1,ITGB2,STAT3,THBS1,TLR4,TNF,TYROBP	18
Cell-To-Cell Signaling and Interaction,Cellular Movement,Hematological System Development and Function,Immune Cell Trafficking,Inflammatory Response	Recruitment of monocytes	2.93e-13	Increased	2.738	APOE,CCL20,CCL3,CCL4,CD55,CXCL3,CXCL8,FPR2,GPR132,HCK,ICAM1,IL1B,NLRP3,STAT3,TNF	15
Cell-To-Cell Signaling and Interaction,Cellular Compromise	Respiratory burst of cells	1.34e-10	Increased	2.743	ANPEP,ATP1A1,CD14,CXCL2,CXCL3,CXCL8,FCER1G,FPR1,HCK,ICAM1,ITGB2,TNF,TYROBP	13
Cellular Movement,Hematological System Development and Function,Immune Cell Trafficking	Mobilization of leukocytes	3.19e-11	Increased	2.923	CCL20,CCL3,CCL3L3,CCL4,CXCL2,CXCL3,CXCL8,FPR1,IL1B,ITGB2,STAT3,TNF	12
Cellular Movement,Hematological System Development and Function,Immune Cell Trafficking,Inflammatory Response	Mobilization of neutrophils	2.07e-12	Increased	2.958	CCL3,CCL4,CXCL2,CXCL3,CXCL8,FPR1,IL1B,STAT3,TNF	9
Cell-To-Cell Signaling and Interaction,Cellular Movement,Hematological System Development and Function,Immune Cell Trafficking	Recruitment of leukocytes	2.83e-22	Increased	2.999	ADGRE5,APOE,CCL20,CCL3,CCL3L3,CCL4,CCRL2,CD14,CD36,CD44,CD55,CXCL2,CXCL3,CXCL8,EGR1,FABP5,FCGR2A,FLT1,FPR2,GPR132,HCK,HIF1A,ICAM1,IL1A,IL1B,IL1RN,IL2RA,ITGB2,KDM6B,LAMTOR2,LGALS1,NFE2L2,NFKB1,NFKBIA,NLRP3,PDE4B,PELI1,PTEN,PTPN2,PYCARD,S100A4,S100A8,SOD2,STAT3,THBS1,TLR4,TNF	47
Cell-To-Cell Signaling and Interaction,Cellular Movement	Recruitment of myeloid cells	2.34e-20	Increased	3.009	ADGRE5,APOE,CCL20,CCL3,CCL3L3,CCL4,CCRL2,CD14,CD36,CD44,CD55,CXCL2,CXCL3,CXCL8,FCGR2A,FLT1,FPR2,GPR132,HCK,ICAM1,IL1A,IL1B,IL1RN,IL2RA,ITGB2,KDM6B,LGALS1,NFE2L2,NFKB1,NFKBIA,NLRP3,PDE4B,PTEN,PYCARD,S100A4,S100A8,SOD2,STAT3,THBS1,TLR4,TNF	41
Cell-To-Cell Signaling and Interaction,Hematological System Development and Function	Activation of myeloid cells	2.49e-13	Increased	3.024	APOE,CCL3,CCL4,CD14,CD36,CD44,CD63,CST3,CXCL3,CXCL8,FCER1G,FCGR2A,FPR1,FPR2,GRN,HCK,ICAM1,IFNGR2,IL1A,IL1B,IL1RN,ITGB2,LCP2,MT-ND3,NAMPT,PELI1,PFKFB3,PPT1,PRKCE,PTGS2,RHOH,S100A8,S100A9,STAT3,THBS1,TLR4,TNF,TYROBP	38
Cellular Compromise	Respiratory burst	3.59e-11	Increased	3.075	ANPEP,ATP1A1,CD14,CXCL2,CXCL3,CXCL8,CYBA,FCER1G,FPR1,HCK,ICAM1,INSR,ITGB2,TLR4,TNF,TYROBP	16
Cell-To-Cell Signaling and Interaction,Cellular Movement,Hematological System Development and Function,Immune Cell Trafficking,Inflammatory Response	Recruitment of phagocytes	7.41e-21	Increased	3.084	APOE,CCL20,CCL3,CCL3L3,CCL4,CCRL2,CD14,CD36,CD44,CD55,CXCL2,CXCL3,CXCL8,FCGR2A,FLT1,FPR2,GPR132,HCK,ICAM1,IL1A,IL1B,IL1RN,IL2RA,ITGB2,LAMTOR2,LGALS1,NFE2L2,NFKB1,NFKBIA,NLRP3,PDE4B,PTEN,PYCARD,S100A4,S100A8,SOD2,STAT3,THBS1,TLR4,TNF	40
Cellular Movement,Hematological System Development and Function,Immune Cell Trafficking,Inflammatory Response	Mobilization of phagocytes	1.12e-11	Increased	3.109	CCL20,CCL3,CCL4,CXCL2,CXCL3,CXCL8,FPR1,IL1B,STAT3,TNF	10
Cellular Movement,Hematological System Development and Function,Immune Cell Trafficking	Mobilization of granulocytes	1.66e-11	Increased	3.116	CCL3,CCL3L3,CCL4,CXCL2,CXCL3,CXCL8,FPR1,IL1B,STAT3,TNF	10
Carbohydrate Metabolism	Metabolism of carbohydrate	1.43e-10	Increased	3.154	ALDOA,APOE,AQP9,ATF6,CCND3,CD36,CD44,CHST11,CSGALNACT2,CTSB,CXCL3,CXCL8,DBI,DUSP6,FABP5,FCGR2A,FPR1,FPR2,GK,GNG2,GPAT3,HIF1A,ICAM1,IL1A,IL1B,IL1R2,IL1RN,INPP5A,INSR,ITGB2,NFKB1,NPL,PFKFB3,PIGL,PLEK,PPP1R15A,PTEN,PTPN1,S100A11,SERP1,SGMS2,SLC44A2,STAT3,SULF2,TALDO1,TKT,TNF,TNFAIP6,TPI1	49
Cell-To-Cell Signaling and Interaction,Cellular Movement	Recruitment of cells	7.97e-23	Increased	3.321	ADGRE5,APOE,BCL6,CCL20,CCL3,CCL3L3,CCL4,CCRL2,CD14,CD36,CD44,CD55,CD63,CXCL2,CXCL3,CXCL8,EGR1,FABP5,FCGR2A,FLT1,FPR2,GPR132,HCK,HIF1A,ICAM1,IL1A,IL1B,IL1RN,IL2RA,ITGB2,KDM6B,LAMTOR2,LGALS1,NFE2L2,NFKB1,NFKBIA,NLRP3,PDE4B,PELI1,PTEN,PTGS2,PTPN2,PYCARD,S100A4,S100A8,SOD2,STAT3,THBS1,TLR4,TNF	50
Cell-To-Cell Signaling and Interaction,Hematological System Development and Function,Immune Cell Trafficking,Inflammatory Response	Activation of phagocytes	3.75e-14	Increased	3.333	APOE,CCL20,CCL3,CCL4,CD14,CD36,CD44,CD63,CST3,CXCL3,CXCL8,FCER1G,FCGR2A,FPR1,FPR2,GRN,HCK,ICAM1,IFNGR2,IL1A,IL1B,IL1RN,ITGB2,LCP2,MT-ND3,NAMPT,PELI1,PFKFB3,PPT1,PRKCE,PTGS2,PYCARD,RHOH,S100A8,S100A9,STAT3,THBS1,TLR4,TNF,TYROBP,VAMP8	41
Cancer,Cell Death and Survival,Organismal Injury and Abnormalities,Tumor Morphology	Cell death of cancer cells	1.16e-15	Increased	3.48	ANPEP,CD44,CFLAR,CTSB,CXCL8,GCH1,HIF1A,HIPK2,IRF1,LGALS1,MALT1,NAMPT,NFE2L2,NFKB1,NFKBIA,PMAIP1,PRKCE,PSMA7,PTEN,PTGS2,REL,RPL11,RPL13,RPL19,RPL27,RPL27A,RPL3,RPL35A,RPL7,RPL7A,RPS13,RPS14,RPS18,RPS19,RPS3,RPS4Y1,RPS5,STAT3,TNF,YBX1,ZFP36	41
Cancer,Cell Death and Survival,Organismal Injury and Abnormalities,Tumor Morphology	Cell death of osteosarcoma cells	5.49e-11	Increased	4.123	PSMA7,RPL11,RPL13,RPL19,RPL27,RPL27A,RPL3,RPL35A,RPL7,RPL7A,RPS13,RPS14,RPS18,RPS19,RPS3,RPS4Y1,RPS5	17
Cellular Function and Maintenance,Hematological System Development and Function	Function of macrophages	7.43e-20			ANPEP,APOE,BIRC3,CAPG,CD14,CD36,CD9,EGR1,FCER1G,FCGR2A,GRN,HCK,ICAM1,IL1B,IRAK2,IRF1,N4BP1,NFKB1,NFKBIA,NLRP3,PTGS2,PYCARD,REL,SGMS2,SLAMF1,STAT3,TLR4,TNF,TYROBP,ZFP36	30
Infectious Diseases,Organismal Injury and Abnormalities	COVID-19	1.78e-19			ACSL1,ACTB,ADM,ARL4C,CCL20,CCL3,CCL4,CCRL2,CFL1,CXCL2,CXCL8,DUSP1,EGR1,EIF1,FCGR2A,FKBP5,GADD45B,GCH1,GPX1,HSPA8,ICAM1,IFNGR2,IL1A,IL1B,IL1RN,KCNJ2,KLF6,LGALS1,NAMPT,NFKB1,PDE4B,PFN1,PLEK,PMAIP1,PTEN,PTGS2,RACK1,RNF19B,S100A8,S100A9,SAMSN1,SLC1A3,SLC25A6,SYN1,TNF,TSPO,TUBA1A,ZFP36	48
Connective Tissue Disorders,Immunological Disease,Inflammatory Disease,Inflammatory Response,Organismal Injury and Abnormalities,Skeletal and Muscular Disorders	Juvenile rheumatoid arthritis	1.64e-17			ADM,APOE,BCL6,CCL20,CCL3,CCL4,DYNLL1,EIF1,FPR2,GADD45B,HIF1A,IL1A,IL1B,IL1RN,LGALS1,NDUFB10,NFKBIA,PDE4B,PTGS2,PTMA,S100A8,S100A9,SEC62,SLC1A2,TALDO1,THBS1,TNF,TNFAIP3,TRAF1,ZFP36	30
Connective Tissue Disorders,Immunological Disease,Inflammatory Disease,Inflammatory Response,Organismal Injury and Abnormalities,Skeletal and Muscular Disorders	Polyarticular juvenile rheumatoid arthritis	3.96e-17			ADM,APOE,BCL6,CCL20,CCL3,CCL4,FPR2,GADD45B,HIF1A,IL1B,LGALS1,NFKBIA,PTGS2,PTMA,S100A8,S100A9,SLC1A2,THBS1,TNF,TNFAIP3,ZFP36	21
Organismal Injury and Abnormalities,Respiratory Disease	Respiratory distress	1.62e-16			ACSL1,ANPEP,ARL4C,BACH1,CCL3,CD14,CD63,CD9,CXCL8,EGR1,ELOB,FCGR2A,FLT1,FPR1,GPX1,ICAM1,IL1A,IL1B,LTA4H,MNDA,MYL6,NAMPT,NFE2L2,NFKBIA,PTGS2,RPS4Y1,S100A9,STAT3,STXBP2,TALDO1,TKT,TNF,TSPO	33
Infectious Diseases,Organismal Injury and Abnormalities,Respiratory Disease	Infection of respiratory tract	5.45e-16			ACSL1,ANPEP,ARL4C,BACH1,CCL20,CCL4,CD14,CD63,CD9,CXCL2,CXCL3,CXCL8,EGR1,ELOB,FPR1,GPX1,IL1A,IL1B,IL2RA,LTA4H,MNDA,MYL6,NFKBIA,PTEN,PTGS2,RPS4Y1,S100A9,STXBP2,TALDO1,TKT,TLR4,TNF	32
Organismal Injury and Abnormalities,Reproductive System Disease	Endometriosis	9.84e-16			ACTB,APOE,BCL6,CCL4,CD44,CXCL8,DUSP1,DYNLL1,EGR1,EIF1,ELL2,EZR,FLT1,FPR2,GBP2,GSTP1,HIF1A,ICAM1,IL1A,IL1B,IL1R2,IL2RA,INSR,ISG20,NFKB1,PFKFB3,PTEN,PTGS2,REL,RPL12,RPS19,RPS23,S100A8,S100A9,TMSB10/TMSB4X,TNF,TRAF1,TUBA1A,ZBTB16,ZFP36	40
Neurological Disease,Organismal Injury and Abnormalities	Progressive encephalopathy	2.04e-15			ACTB,AIF1,APOC1,APOE,ARHGDIB,ATP1A1,BACH1,CCL3,CCL3L3,CCL4,CD14,CD36,CFD,CFL1,CH25H,COPE,CST3,CSTB,CTSB,CXCL8,DBI,EEF1G,ETS2,EZR,FCGR2A,FKBP5,FLT1,FTL,GAS7,GBP2,GCH1,GPR183,GRN,GSTP1,HIF1A,ICAM1,IL1A,IL1B,IL1R2,INPP5A,INSR,LDLR,LGALS1,NFE2L2,NFKBIZ,OOEP,PDE4B,PFN1,PRKCE,PTCD1,PTEN,PTGS2,RACK1,RPL13,RPL15,RPL3,S100A4,S100A6,S100A9,SLC1A2,SLC1A3,SLC25A6,SOD2,STAT3,SYN1,TLR4,TNF,TNIP1,TSPO,TUBA1A,TY…	72
Gastrointestinal Disease,Organismal Injury and Abnormalities	Periodontal disease	1.13e-14			AREG,BTG2,CCL3,CCL3L3,CCL4L1/CCL4L2,CXCL8,EGR1,FAM20A,FPR1,GADD45B,HSP90AA1,IL1A,IL1B,IL1RN,MAFF,MTSS1,NFKBIZ,PDE4B,PFKFB3,PTGS2,SAMSN1,STAT3,TNF,TNFAIP3,TUBA1A	25
Neurological Disease,Organismal Injury and Abnormalities,Psychological Disorders	Tauopathy	1.22e-14			ACTB,AIF1,APOC1,APOE,ATP1A1,CAPG,CCL3,CCL3L3,CCL4,CD14,CD36,CD63,CD9,CFD,CFL1,CH25H,CST3,CTSB,CXCL8,EEF1G,ETS2,FCGR2A,FKBP5,FLT1,GAS7,GBP2,GPR183,GRN,HIF1A,ICAM1,IL1A,IL1B,INPP5A,INSR,LDLR,LGALS1,NFE2L2,NFKBIZ,OOEP,PRKCE,PTCD1,PTEN,PTGS2,RACK1,S100A9,SLC1A2,SLC1A3,SOD2,STAT3,TLR4,TNF,TSPO,TUBA1A,TYROBP	54
Organismal Development	Morphology of body cavity	2.25e-14			ABL2,ACSL1,ADGRE5,ADM,AKAP13,ALDH1A2,APOE,AREG,ARHGDIB,ATF6,BCL6,BIRC3,CCND3,CD14,CD36,CD44,CD55,CD9,CFLAR,CST3,CTSB,DUSP1,DUSP6,ECE1,EGR1,ETS2,EZR,FABP5,FAM20A,FCER1G,FLT1,FMN1,FPR2,GBP2,GPAT3,GPR132,GPX1,GRN,H2AZ1,HCK,HIF1A,ICAM1,IL1B,IL1RN,IL2RA,INSR,IRAK3,IRF1,ITGB2,KDM6B,KLF6,LCP2,LDLR,LIMK2,LITAF,MALT1,MBNL1,MTSS1,NFAT5,NFE2L2,NFKB1,NFKBIA,NFKBIZ,NLRP3,NPC2,PFN1,PKP2,PPP1R15A,PPT1,PRKCE,PTE…	98
Infectious Diseases,Organismal Injury and Abnormalities,Respiratory Disease	Viral respiratory infection	2.26e-14			ACSL1,ANPEP,ARL4C,BACH1,CCL20,CCL4,CD14,CD63,CD9,CXCL8,EGR1,ELOB,FPR1,GPX1,IL1A,IL1B,LTA4H,MNDA,MYL6,NFKBIA,RPS4Y1,S100A9,STXBP2,TALDO1,TKT,TNF	26
Cancer,Organismal Injury and Abnormalities	Liquid tumor	3.57e-14			ABL2,ACSL1,ACTB,ACTG1,AKAP13,ALDH1A2,ANPEP,ATF6,BCL6,BIRC3,BTG2,C1QC,CCL3,CCL4,CCND3,CD14,CD300E,CD36,CD44,CD58,CD9,CFL1,CSMD1,CXCL8,DLGAP1,DUSP1,ECE1,EGR1,FCER1G,FCGR2A,FGD4,FLT1,FMN1,GBP2,GRN,GSTP1,HCK,HOOK2,HSP90AA1,HSPA8,IL1B,IL1RAPL1,IL1RN,IL2RA,INPP5A,INSR,IRAK2,IRF1,ITGB2,LAMTOR2,LGALS1,MAFF,MAP4K3,MGST3,MIR4435-2HG,MNDA,MT-ND3,N4BP1,NAMPT,NBPF10 (includes others),NFE2L2,NFKB1,PCNX1,PDE4B,…	124
Organismal Injury and Abnormalities,Reproductive System Disease	Benign pelvic disease	4.64e-14			ACTB,ADGRE5,ALDOA,AP2S1,APOE,BCL6,CCL4,CD44,COX6B1,CXCL8,CYBA,DUSP1,DYNLL1,EGR1,EIF1,ELL2,ETS2,EZR,FLT1,FPR2,GBP2,GSTP1,HIF1A,ICAM1,IL1A,IL1B,IL1R2,IL2RA,INSR,ISG20,LDLRAD4,MYL6,NFKB1,PFKFB3,PIK3AP1,PTEN,PTGS2,REL,RPL12,RPL19,RPL27,RPS15,RPS19,RPS23,RPS25,S100A6,S100A8,S100A9,SIPA1L1,SOD2,STX3,TET2,TMEM59,TMSB10/TMSB4X,TNF,TRAF1,TUBA1A,TULP2,YBX1,ZBTB16,ZFP36	61
Organismal Injury and Abnormalities,Respiratory Disease	Severe pulmonary disease	6.92e-14			ACSL1,ANPEP,ARL4C,BACH1,CD14,CD63,CD9,CXCL8,EGR1,ELOB,FCGR2A,FPR1,GPX1,IL1A,IL1B,LTA4H,MNDA,MYL6,NFKBIA,PDE4B,RPS4Y1,S100A9,STXBP2,TALDO1,TKT,TNF	26
Infectious Diseases,Inflammatory Disease,Organismal Injury and Abnormalities,Respiratory Disease	Severe acute respiratory syndrome	1.59e-13			ACSL1,ANPEP,ARL4C,BACH1,CD14,CD63,CD9,CXCL8,EGR1,ELOB,FPR1,GPX1,IL1A,IL1B,LTA4H,MNDA,MYL6,NFKBIA,RPS4Y1,S100A9,STXBP2,TALDO1,TKT,TNF	24
Hematological Disease,Immunological Disease,Organismal Injury and Abnormalities	Histiocytosis	1.63e-13			APOE,CD14,CXCL2,CXCL3,FCGR2A,FLT1,IFNGR2,IL1A,IL1B,IL1R2,IL1RN,IL2RA,INSR,NFKB1,POLE4,PTGS2,STX11,STXBP2,THBS1,TLR4,TNF,TUBA1A	22
Metabolic Disease,Neurological Disease,Organismal Injury and Abnormalities,Psychological Disorders	Alzheimer disease	1.71e-13			ACTB,AIF1,APOC1,APOE,ATP1A1,CCL3,CCL3L3,CCL4,CD14,CD36,CFD,CFL1,CH25H,CST3,CTSB,CXCL8,EEF1G,ETS2,FCGR2A,FKBP5,FLT1,GAS7,GBP2,GPR183,GRN,HIF1A,ICAM1,IL1A,IL1B,INPP5A,INSR,LDLR,LGALS1,NFE2L2,NFKBIZ,OOEP,PRKCE,PTCD1,PTEN,PTGS2,RACK1,S100A9,SLC1A2,SLC1A3,SOD2,STAT3,TLR4,TNF,TSPO,TYROBP	50
Endocrine System Disorders,Metabolic Disease,Organismal Injury and Abnormalities	Metabolic syndrome X	1.77e-13			ACSL1,ADM,APOE,ATP5MJ,CFD,COX7C,CXCL8,ETS2,GRN,IL1A,IL1B,INSR,LDLR,NDUFA4,PFDN5,PTGS2,RPL41,RPL7,S100A8,SUB1,THBS1,TNF,TPST1	23
Hematological System Development and Function,Lymphoid Tissue Structure and Development,Tissue Morphology	Morphology of lymphoid tissue	1.99e-13			AKAP13,APOE,ARHGDIB,BCL6,CCND3,CD55,CFLAR,DUSP6,EGR1,ETS2,EZR,FCER1G,FPR2,HCK,IL1RN,IL2RA,IRAK3,IRF1,ITGB2,LCP2,MALT1,NFE2L2,NFKB1,NFKBIA,NFKBIZ,NLRP3,PPP1R15A,PPT1,PRKCE,PRKCH,PTEN,PTGS2,PTPN2,PYCARD,REL,RHOH,STAT3,TET2,TLR4,TNF,TNFAIP3,TNIP1,TRAF1,TYROBP,ZFP36	45
Organismal Development	Abnormal morphology of body cavity	2.26e-13			ABL2,ACSL1,ADM,AKAP13,ALDH1A2,APOE,AREG,ARHGDIB,ATF6,BCL6,BIRC3,CCND3,CD36,CD44,CD55,CD9,CFLAR,CST3,CTSB,DUSP1,ECE1,EGR1,EZR,FAM20A,FCER1G,FLT1,FMN1,FPR2,GBP2,GPX1,GRN,H2AZ1,HCK,HIF1A,ICAM1,IL1B,IL1RN,IL2RA,INSR,IRAK3,IRF1,ITGB2,KDM6B,LCP2,LDLR,LIMK2,LITAF,MALT1,MBNL1,MTSS1,NFAT5,NFE2L2,NFKB1,NFKBIA,NFKBIZ,NLRP3,NPC2,PFN1,PKP2,PPP1R15A,PPT1,PRKCE,PTEN,PTGS2,PTPN1,PTPN2,PYCARD,REL,RHOH,S100A6,SAV1…	87
Inflammatory Disease,Organismal Injury and Abnormalities	Severe inflammatory disorder	2.82e-13			ACSL1,ANPEP,ARL4C,BACH1,CD14,CD44,CD63,CD9,CXCL8,EGR1,ELOB,FCGR2A,FPR1,GPX1,GRN,IL1A,IL1B,IRAK3,LTA4H,MNDA,MYL6,NFKBIA,PDE4B,PTGS2,RPS4Y1,S100A9,STXBP2,TALDO1,TKT,TNF,TNFAIP3	31
Gastrointestinal Disease,Organismal Injury and Abnormalities	Chronic periodontal disease	5.59e-13			BTG2,CCL3,CCL3L3,CCL4L1/CCL4L2,CXCL8,EGR1,GADD45B,IL1A,IL1B,IL1RN,MAFF,MTSS1,NFKBIZ,PDE4B,PFKFB3,PTGS2,SAMSN1,TNFAIP3	18
Immunological Disease,Inflammatory Disease,Organismal Injury and Abnormalities	Atopic disease	5.64e-13			ACTB,ADGRE2,ALDOA,CAPG,CCL20,CD44,CFL1,CST3,CXCL8,DUSP1,EIF1,FABP5,FCER1G,FPR2,HCK,IL1A,IL1B,IL1RN,IL2RA,LGALS1,NFKBIZ,PDE4B,PTGS2,S100A11,S100A8,S100A9,TKT,TLR4,TNF,TNFAIP3,TPI1,ZFP36	32
Hematological System Development and Function,Lymphoid Tissue Structure and Development,Organ Morphology,Tissue Morphology	Morphology of lymphoid organ	5.75e-13			AKAP13,APOE,ARHGDIB,BCL6,CCND3,CD55,CFLAR,DUSP6,EGR1,ETS2,EZR,FCER1G,FPR2,HCK,IL1RN,IL2RA,IRF1,ITGB2,LCP2,MALT1,NFE2L2,NFKB1,NFKBIA,NFKBIZ,NLRP3,PPP1R15A,PPT1,PRKCE,PRKCH,PTEN,PTGS2,PTPN2,REL,RHOH,STAT3,TET2,TLR4,TNF,TNFAIP3,TNIP1,TRAF1,ZFP36	42
Cancer,Hematological Disease,Organismal Injury and Abnormalities	Myelodysplastic syndrome or leukemia	5.79e-13			ABL2,ACSL1,ACTB,ACTG1,AKAP13,ALDH1A2,ANPEP,ATF6,BCL6,BIRC3,BTG2,C1QC,CCL3,CCL4,CCND3,CD14,CD300E,CD36,CD44,CD58,CFL1,CSMD1,CXCL8,DLGAP1,DUSP1,ECE1,FCER1G,FCGR2A,FGD4,FLT1,FMN1,GBP2,GRN,GSTP1,HCK,HOOK2,HSP90AA1,HSPA8,IL1B,IL1RAPL1,IL1RN,IL2RA,INPP5A,INSR,IRF1,ITGB2,LAMTOR2,LGALS1,MAP4K3,MGST3,MIR4435-2HG,MNDA,MT-ND3,N4BP1,NAMPT,NBPF10 (includes others),NFE2L2,NFKB1,PCNX1,PDE4B,PFKFB3,PIK3AP1,POLE4…	119
Cancer,Hematological Disease,Immunological Disease,Organismal Injury and Abnormalities	Mature B-cell neoplasm	9.67e-13			ANPEP,APOE,ARMC9,ATF6,BCL6,BIRC3,BTG2,CCL3,CCL4,CCND3,CD300E,CD36,CD44,CD58,CD63,CFL1,CFLAR,CSGALNACT2,CSMD1,CST3,CXCL2,CXCL8,DENND4A,DUSP1,EGR1,EHD1,EIF4E,FCGR2A,FLT1,GBP2,HELB,HIF1A,HLA-DQA2,HSP90AA1,IL1B,IL1RN,IL2RA,INPP5A,IRF1,ITGB2,KDM6B,LCP2,MALT1,NAMPT,NBPF10 (includes others),NFE2L2,NFKB1,NFKBIA,PAG1,PFKFB3,PKP2,PMAIP1,PNRC1,POLE4,PPP1R15A,PTEN,PTGS2,PTPN1,RACK1,RASGEF1B,REL,RHOH,RPL19,RP…	84
Hematological Disease,Immunological Disease,Organismal Injury and Abnormalities	Hemophagocytic syndrome	1.13e-12			CXCL2,CXCL3,HSP90AA1,IFNGR2,IL1A,IL1B,IL1R2,IL1RN,IL2RA,NFKB1,STX11,STXBP2,TLR4,TNF	14
Cancer,Organismal Injury and Abnormalities,Renal and Urological Disease	Renal tumor	2.95e-12			ACTB,ADM,ANPEP,APOC1,AQP9,ATP5MG,BLVRB,BTG2,CCL4,CD44,CD9,CFLAR,COX5B,COX6B1,CRYBG1,CSMD1,CXCL2,CXCL8,CYRIA,DENND5A,DUSP6,EEF1B2,EREG,ETS2,FABP5,FCER1G,FLT1,GABARAP,GABPB1,GBP2,GPR132,GPX1,GSTP1,HIF1A,HSP90AA1,IL1B,IL1RAPL1,IL1RN,IL2RA,INSR,ITGB2,KCNMA1,KDM6B,KLF6,LTA4H,LUCAT1,MCTP1,NBPF10 (includes others),NDUFB10,NFAT5,NFE2L2,NFKB1,NFKBIA,NFKBIZ,NPL,PAG1,PDE4B,PRKCE,PRKCH,PTEN,RANBP2,RBFOX2,REL…	84
Organismal Functions,Organismal Injury and Abnormalities	Healing of lesion	3.65e-12			ADM,CCL3,CD44,CFLAR,CLIC4,EGR1,EREG,FLT1,GRN,ICAM1,IL1A,IL1B,IL1RN,ITGB2,KLF6,MT2A,NACA,NLRP3,PRKCH,PTGS2,SDC4,THBS1,TLR4,TNF	24
Organismal Injury and Abnormalities,Tissue Morphology	Morphology of lesion	3.81e-12			AKAP13,APOE,AREG,ARL4C,CD44,CST3,CSTB,CTSB,CXCL3,DUSP6,EGR1,ETS2,FCER1G,FLT1,GPX1,GRN,HIF1A,ICAM1,IL1A,IL1B,IL1RN,IRF1,KLF6,LDLR,LGALS1,NAMPT,NFE2L2,NFKBIA,NLRP3,PLK3,PRKCE,PTEN,PTGS2,PTPN2,STAT3,SULF2,THBS1,TLR4,TNF,TNFAIP3,TNFAIP8	41
Organismal Injury and Abnormalities,Tissue Morphology	Size of lesion	3.91e-12			AKAP13,APOE,AREG,ARL4C,CD44,CST3,CSTB,CTSB,CXCL3,DUSP6,EGR1,ETS2,FCER1G,FLT1,GPX1,GRN,HIF1A,ICAM1,IL1A,IL1B,IL1RN,IRF1,KLF6,LDLR,LGALS1,NAMPT,NFE2L2,NFKBIA,NLRP3,PRKCE,PTEN,PTGS2,PTPN2,STAT3,SULF2,THBS1,TLR4,TNFAIP3,TNFAIP8	39
Organismal Development,Organismal Injury and Abnormalities	Abnormal morphology of abdomen	5.17e-12			ABL2,AKAP13,APOE,AREG,ARHGDIB,BCL6,CD36,CD44,CD55,CD9,CFLAR,DUSP1,EGR1,EZR,FAM20A,FCER1G,FMN1,FPR2,GPX1,GRN,HCK,ICAM1,IL2RA,INSR,IRAK3,IRF1,ITGB2,LCP2,LDLR,LIMK2,MALT1,MTSS1,NFAT5,NFE2L2,NFKB1,NFKBIA,NFKBIZ,NLRP3,PPP1R15A,PPT1,PRKCE,PTEN,PTGS2,PTPN1,PTPN2,PYCARD,REL,RHOH,SAV1,SCGB1A1,SDC4,SERP1,SESTD1,SOD2,THBS1,TLR4,TNF,TNFAIP3,TNIP1,YBX1,ZFP36	61
Hematological Disease,Immunological Disease,Organismal Injury and Abnormalities	Hemophagocytic lymphohistiocytosis	6.73e-12			CXCL2,CXCL3,IFNGR2,IL1A,IL1B,IL1R2,IL1RN,IL2RA,NFKB1,STX11,STXBP2,TLR4,TNF	13
Dermatological Diseases and Conditions,Immunological Disease,Inflammatory Disease,Inflammatory Response,Organismal Injury and Abnormalities	Atopic dermatitis	1.07e-11			CAPG,CCL20,CD44,CFL1,CST3,CXCL8,DUSP1,EIF1,FABP5,FCER1G,HCK,IL1A,IL1B,IL1RN,IL2RA,LGALS1,NFKBIZ,PDE4B,PTGS2,S100A11,S100A8,S100A9,TLR4,TNF,TNFAIP3,TPI1,ZFP36	27
Organismal Development,Organismal Injury and Abnormalities	Abnormal morphology of thoracic cavity	1.52e-11			ABL2,ACSL1,ADM,AKAP13,ALDH1A2,APOE,ARHGDIB,ATF6,BCL6,BIRC3,CCND3,CD36,CD9,CFLAR,CST3,CTSB,DUSP1,ECE1,FAM20A,FLT1,GBP2,GPX1,H2AZ1,HCK,HIF1A,IL1B,IL1RN,IL2RA,INSR,IRF1,KDM6B,LCP2,LITAF,MALT1,MBNL1,NFAT5,NFE2L2,NFKB1,NFKBIA,NPC2,PFN1,PKP2,PRKCE,PTEN,PTGS2,REL,RHOH,S100A6,SAV1,SFTPC,SLC1A3,SLC27A4,SOD2,STAT3,THBS1,TLR4,TNF,TNFAIP3,TPI1,ZFP36	60
Cancer,Organismal Injury and Abnormalities,Renal and Urological Disease	Renal cancer	1.56e-11			ACTB,ADM,ANPEP,APOC1,AQP9,ATP5MG,BLVRB,BTG2,CCL4,CD44,CD9,CFLAR,COX5B,COX6B1,CRYBG1,CSMD1,CXCL2,CXCL8,CYRIA,DENND5A,DUSP6,EEF1B2,EREG,ETS2,FABP5,FCER1G,FLT1,GABARAP,GABPB1,GBP2,GPX1,GSTP1,HIF1A,HSP90AA1,IL1B,IL1RAPL1,IL1RN,IL2RA,INSR,ITGB2,KCNMA1,KDM6B,KLF6,LTA4H,LUCAT1,MCTP1,NBPF10 (includes others),NDUFB10,NFAT5,NFE2L2,NFKB1,NFKBIA,NFKBIZ,NPL,PAG1,PDE4B,PRKCE,PRKCH,PTEN,RANBP2,RBFOX2,REL,RIN2,R…	81
Neurological Disease,Organismal Injury and Abnormalities	Progressive motor neuropathy	1.71e-11			ACTB,APOE,AREG,ARHGDIB,BACH1,CD36,CD44,CFLAR,COPE,CST3,CTSB,DBI,EGR1,ETS2,EZR,FCGR2A,FTL,GCH1,GPR132,GRN,GSTP1,HLA-DQA2,IL1A,IL1B,IL1R2,IL2RA,KCNMA1,LDLR,NLRP3,PDE4B,PFN1,POLE4,PTGS2,RPL13,RPL15,RPL3,RPS6,S100A4,S100A6,SLC1A2,SLC1A3,SLC25A6,SOD2,SYN1,TLR4,TNF,TNIP1,TP53BP2,TSPO,TUBA1A,USP36	51
Cancer,Hematological Disease,Immunological Disease,Organismal Injury and Abnormalities	Mature B cell malignant tumor	2.3e-11			ANPEP,APOE,ARMC9,BCL6,BIRC3,BTG2,CCL3,CCL4,CCND3,CD36,CD44,CD58,CD63,CFLAR,CSGALNACT2,CSMD1,CST3,CXCL2,CXCL8,DENND4A,EGR1,EHD1,EIF4E,FCGR2A,FLT1,GBP2,HELB,HIF1A,HLA-DQA2,HSP90AA1,IL1B,IL1RN,IL2RA,IRF1,ITGB2,KDM6B,LCP2,MALT1,NBPF10 (includes others),NFKB1,NFKBIA,PAG1,PKP2,PMAIP1,PNRC1,POLE4,PTEN,PTGS2,PTPN1,RACK1,REL,RPL19,RPS15,RPS2,RPS20,RPS6,S100A4,SERP1,SOD2,STAT3,STX11,TET2,TEX14,TLR4,TNF,TNF…	69
Cell Morphology	Morphology of blood cells	2.46e-11			APOE,CCL4,CCND3,CD36,CXCL8,EGR1,EIF4E,ETS2,FCER1G,FTL,HCK,ICAM1,IL1RN,IL2RA,IRF1,ITGB2,LAMTOR2,LCP2,LDLR,MALT1,NFE2L2,NFKBIA,NFKBIZ,NPC2,PIK3AP1,PPP1R15A,PRKCE,PRKCH,PTEN,RAPGEF2,REL,RHOH,SERPINB9,SGMS2,THBS1,TLR4,TNF	37
Immunological Disease,Organismal Injury and Abnormalities	Abnormal morphology of immune system	2.67e-11			APOE,BCL6,CD36,EGR1,FCER1G,FTL,HCK,ICAM1,IL1RN,IL2RA,IRAK3,IRF1,ITGB2,LAMTOR2,LCP2,LDLR,MALT1,NFKBIA,NFKBIZ,NPC2,PIK3AP1,PRKCH,REL,RHOH,SERPINB9,SGMS2,TLR4,TNF,TNIP1	29
Cell Morphology	Morphology of leukocytes	3.81e-11			APOE,CCL4,CD36,CXCL8,EGR1,EIF4E,ETS2,FCER1G,FTL,HCK,ICAM1,IL1RN,IL2RA,IRF1,ITGB2,LAMTOR2,LCP2,LDLR,MALT1,NFKBIA,NFKBIZ,NPC2,PIK3AP1,PRKCH,PTEN,REL,RHOH,SERPINB9,SGMS2,TLR4,TNF	31
Hematological Disease,Hereditary Disorder,Immunological Disease,Organismal Injury and Abnormalities	Familial hemophagocytic lymphohistiocytosis	4.08e-11			CXCL2,CXCL3,IFNGR2,IL1A,IL1B,IL1R2,IL1RN,NFKB1,STX11,STXBP2,TLR4	11
Cell Morphology	Size of cells	5.25e-11			ABL2,ADM,AKAP13,APOC1,APOE,CCND3,CD44,CFL1,CST3,DUSP1,EGR1,EHD1,EIF4E,GABARAP,GPX1,HIF1A,ICAM1,IL1B,INSR,IRAK2,KCNMA1,LAMTOR4,LDLR,MAP1LC3B,NFE2L2,NFKB1,OXSR1,PPP1R15A,PRKCH,PTEN,PTPN1,PTPN12,PYCARD,RPS14,RPS6,SIPA1L1,SLC27A4,SOD2,SYN1,TLR4,TNF,USP36,ZBTB16,ZFYVE16	44
Cancer,Organismal Injury and Abnormalities,Renal and Urological Disease	Kidney carcinoma	5.44e-11			ADM,ANPEP,APOC1,AQP9,ATP5MG,BLVRB,CCL4,CD44,CD9,CFLAR,COX5B,COX6B1,CRYBG1,CSMD1,CXCL2,CXCL8,CYRIA,DENND5A,DUSP6,EEF1B2,EREG,ETS2,FABP5,FCER1G,FLT1,GABPB1,GBP2,GPX1,GSTP1,HIF1A,HSP90AA1,IL1B,IL1RAPL1,IL1RN,IL2RA,INSR,ITGB2,KCNMA1,KDM6B,KLF6,LTA4H,LUCAT1,MCTP1,NBPF10 (includes others),NDUFB10,NFAT5,NFE2L2,NFKBIA,NFKBIZ,NPL,PAG1,PDE4B,PRKCE,PRKCH,PTEN,RANBP2,RBFOX2,REL,RIN2,RIPOR3,S100A11,SAV1,SDHD,…	76
Hematological System Development and Function,Immunological Disease,Lymphoid Tissue Structure and Development,Organ Morphology,Organismal Injury and Abnormalities,Tissue Morphology	Abnormal morphology of lymphoid organ	7.12e-11			AKAP13,ARHGDIB,BCL6,CCND3,CFLAR,EZR,FCER1G,FPR2,HCK,IL1RN,IL2RA,IRF1,ITGB2,LCP2,MALT1,NFE2L2,NFKB1,NFKBIA,NFKBIZ,NLRP3,PPP1R15A,PPT1,PRKCH,PTEN,PTGS2,PTPN2,REL,RHOH,TLR4,TNF,TNFAIP3,TNIP1,TRAF1,ZFP36	34
Hematological System Development and Function,Lymphoid Tissue Structure and Development,Organ Morphology,Organismal Development,Tissue Morphology	Morphology of spleen	7.38e-11			AKAP13,APOE,BCL6,CD55,CFLAR,DUSP6,EGR1,EZR,FCER1G,HCK,IL2RA,IRF1,ITGB2,LCP2,MALT1,NFE2L2,NFKB1,NFKBIA,NFKBIZ,NLRP3,PPP1R15A,PPT1,PRKCE,PTEN,PTGS2,PTPN2,REL,RHOH,TET2,TNF,TNFAIP3,TNIP1,ZFP36	33
Cancer,Organismal Injury and Abnormalities,Renal and Urological Disease	Renal cell carcinoma	8.41e-11			ADM,ANPEP,APOC1,AQP9,ATP5MG,BLVRB,CCL4,CD44,CD9,CFLAR,COX5B,COX6B1,CRYBG1,CSMD1,CXCL2,CXCL8,CYRIA,DENND5A,DUSP6,EEF1B2,EREG,ETS2,FABP5,FCER1G,FLT1,GABPB1,GBP2,GPX1,GSTP1,HIF1A,HSP90AA1,IL1B,IL1RAPL1,IL1RN,IL2RA,INSR,ITGB2,KCNMA1,KDM6B,KLF6,LTA4H,LUCAT1,MCTP1,NBPF10 (includes others),NDUFB10,NFAT5,NFE2L2,NFKBIA,NFKBIZ,NPL,PAG1,PDE4B,PRKCE,PRKCH,PTEN,RANBP2,RBFOX2,REL,RIN2,RIPOR3,S100A11,SAV1,SDHD,…	75
Cancer,Hematological Disease,Immunological Disease,Organismal Injury and Abnormalities	B-cell neoplasm	1.19e-10			ABL2,ALDH1A2,ANPEP,APOE,ARMC9,ATF6,BCL6,BIRC3,BTG2,C1QC,CCL3,CCL4,CCND3,CD300E,CD36,CD44,CD58,CD63,CFL1,CFLAR,CSGALNACT2,CSMD1,CST3,CXCL2,CXCL8,DENND4A,DLGAP1,DUSP1,EGR1,EHD1,EIF4E,FCGR2A,FLT1,GBP2,HCK,HELB,HIF1A,HLA-DQA2,HOOK2,HSP90AA1,ICAM1,IL1B,IL1RAPL1,IL1RN,IL2RA,INPP5A,IRF1,ITGB2,KDM6B,LCP2,LGALS1,MALT1,MT-ND3,N4BP1,NAMPT,NBPF10 (includes others),NFE2L2,NFKB1,NFKBIA,PAG1,PFKFB3,PKP2,PMAIP1,…	98
Gastrointestinal Disease,Organismal Injury and Abnormalities	Benign oral disorder	1.35e-10			ACTB,AREG,BTG2,CCL20,CCL3,CCL3L3,CCL4,CCL4L1/CCL4L2,CD44,CST3,CXCL3,CXCL8,EGR1,FAM20A,FCGR2A,FPR1,GADD45B,GBP2,HSP90AA1,IL1A,IL1B,IL1R2,IL1RN,IRF1,KCNJ2,LGALS1,MAFF,MTSS1,NAMPT,NFKBIA,NFKBIZ,PDE4B,PFKFB3,PTGS2,SAMSN1,SLC27A4,STAT3,TLR4,TNF,TNFAIP3,TSPO,TUBA1A	42
Dermatological Diseases and Conditions,Organismal Injury and Abnormalities	Chronic skin disorder	1.76e-10			APOE,CCL20,CFLAR,CSTB,CTSB,CXCL8,ELL2,EREG,FABP5,FCGR2A,GSTP1,H2AZ1,HIF1A,HSPA8,IL1A,IL2RA,KYNU,LDLR,PDE4B,S100A11,S100A8,S100A9,SOD2,TNF,ZFP36	25
Gastrointestinal Disease,Immunological Disease,Organismal Injury and Abnormalities	Gastrointestinal autoimmune disorder	1.85e-10			BTG2,CCL3,EGR1,GCH1,IL1B,IL2RA,LDLR,NFKBIA,PELI1,PFKFB3,PTGS2,RPS14,TNFAIP3,ZFP36	14
Cancer,Organismal Injury and Abnormalities	Head and neck carcinoma	2.23e-10			ABL2,ACSL1,ACTB,ACTG1,ADGRE2,ADGRE5,AIF1,AKAP13,ALDH1A2,ALDOA,ANKRD28,ANPEP,AP2S1,APOC1,APOE,APOO,AREG,ARHGDIB,ARL4C,ARMC9,ARPC2,ATF6,ATP1A1,ATP6V0B,ATP6V0E1,BACH1,BAZ1A,BCL6,BIRC3,BLVRB,BTG2,C1QB,CAPG,CCL20,CCND3,CCSER1,CD36,CD44,CD55,CD58,CFD,CFL1,CFLAR,CH25H,CLIC4,COPE,CRYBG1,CSGALNACT2,CSMD1,CSTB,CTSB,CXCL2,CXCL3,CXCL8,CYBA,CYRIA,DDAH2,DENND4A,DENND5A,DLGAP1,DUSP1,DUSP6,ECE1,EDF1,EEF1B2,EEF1G…	287
Cancer,Hematological Disease,Immunological Disease,Organismal Injury and Abnormalities	B cell cancer	2.24e-10			ABL2,ALDH1A2,ANPEP,APOE,ARMC9,ATF6,BCL6,BIRC3,BTG2,C1QC,CCL3,CCL4,CCND3,CD36,CD44,CD58,CD63,CFLAR,CSGALNACT2,CSMD1,CST3,CXCL2,CXCL8,DENND4A,DLGAP1,DUSP1,EGR1,EHD1,EIF4E,FCGR2A,FLT1,GBP2,HCK,HELB,HIF1A,HLA-DQA2,HOOK2,HSP90AA1,ICAM1,IL1B,IL1RAPL1,IL1RN,IL2RA,INPP5A,IRF1,ITGB2,KDM6B,LCP2,LGALS1,MALT1,MT-ND3,N4BP1,NAMPT,NBPF10 (includes others),NFE2L2,NFKB1,NFKBIA,PAG1,PFKFB3,PKP2,PMAIP1,PNRC1,POLE4,…	92
Cancer,Hematological Disease,Immunological Disease,Organismal Injury and Abnormalities	High-grade lymphoma	2.63e-10			ABL2,BCL6,BIRC3,BTG2,CCND3,CD36,CD44,CD58,CD63,CFLAR,EGR1,EIF4E,HCK,HELB,HLA-DQA2,HSP90AA1,ICAM1,IL2RA,IRF1,NFKB1,NFKBIA,PAG1,PMAIP1,POLE4,PTEN,PTPN1,REL,RPL3,STAT3,TET2,TNF,TNFAIP3,TNIP1,TUBA1A	34
Organismal Injury and Abnormalities	Visceromegaly	2.65e-10			ACSL1,ADM,AKAP13,ALDH1A2,APOE,ATF6,CD36,CFLAR,CTSB,DUSP1,ECE1,EZR,FCER1G,FLT1,GBP2,GPX1,GRN,H2AZ1,HCK,HIF1A,ICAM1,IL1B,IL2RA,INSR,IRF1,ITGB2,LCP2,LITAF,MALT1,MBNL1,NFE2L2,NFKB1,NFKBIA,NFKBIZ,NLRP3,PFN1,PKP2,PRKCE,PTEN,PTGS2,PTPN2,REL,S100A6,SAV1,SLC1A3,SOD2,STAT3,TLR4,TNF,TNFAIP3,TNIP1,TPI1,ZFP36	53
Cancer,Hematological Disease,Immunological Disease,Organismal Injury and Abnormalities	Lymphocytic leukemia	2.84e-10			ABL2,ACTG1,ALDH1A2,ANPEP,ATF6,BCL6,BIRC3,BTG2,C1QC,CCL3,CCL4,CCND3,CD14,CD300E,CD36,CD44,CD58,CFL1,CXCL8,DLGAP1,DUSP1,FCGR2A,FLT1,GBP2,HCK,HOOK2,HSP90AA1,HSPA8,IL1B,IL1RAPL1,IL1RN,IL2RA,INPP5A,IRF1,ITGB2,LGALS1,MT-ND3,N4BP1,NAMPT,NFE2L2,NFKB1,PDE4B,PFKFB3,POLE4,PPP1R15A,PRKCE,PTEN,PTPN1,PTPN2,RASGEF1B,REL,RHOH,RPL3,RPL7A,S100A9,SIPA1L1,SLC1A2,SLC44A2,ST6GALNAC3,STAT3,STX11,SYN1,TET2,TEX14,TLR4,TN…	70
Infectious Diseases,Organismal Injury and Abnormalities	Severe COVID-19	3.69e-10			ACSL1,ACTB,ARL4C,CCL3,CCL4,CXCL8,DUSP1,EIF1,FCGR2A,IL1B,IL1RN,LGALS1,PFN1,PLEK,RACK1,S100A8,S100A9,SLC25A6,TNF,TUBA1A	20

## Sheet: Bio Functions 2 (COPD vs ctl)
© 2000-2022 QIAGEN. All rights reserved.
Categories	Diseases or Functions Annotation	p-value	Predicted Activation State	Activation z-score	Molecules	# Molecules
Connective Tissue Disorders,Inflammatory Disease,Inflammatory Response,Organismal Injury and Abnormalities,Skeletal and Muscular Disorders	Inflammation of joint	9.08e-23		0.658	ADAMTS2,ADGRE5,AREG,C1QA,CD74,CFD,CH25H,CTSB,FCGR3A/FCGR3B,FKBP5,FOXO3,FTL,HIF1A,HLA-DPA1,HLA-DPB1,HLA-DQA1,HLA-DQA2,HLA-DQB1,HLA-DRA,HLA-DRB1,HLA-DRB5,HMOX1,HSPA1A/HSPA1B,HSPD1,IL10,IL1B,LDLR,LY6E,MAP4K4,MSR1,NFKBIA,NLRP3,PPARD,PPARG,PTEN,PTPN1,RETN,S100A12,S100A8,S100A9,SLC1A3,SLC39A8,STAT3,STK17B,TNFAIP3,TNFSF13B,TPST1,VSIG4	48
Connective Tissue Disorders,Inflammatory Disease,Organismal Injury and Abnormalities,Skeletal and Muscular Disorders	Rheumatic Disease	2.29e-22		0.658	ADAMTS2,ADGRE5,AREG,C1QA,CD74,CFD,CH25H,CTSB,FCGR3A/FCGR3B,FKBP5,FOXO3,FTL,HIF1A,HLA-DPA1,HLA-DPB1,HLA-DQA1,HLA-DQA2,HLA-DQB1,HLA-DRA,HLA-DRB1,HLA-DRB5,HMOX1,HSPA1A/HSPA1B,HSPD1,IL10,IL1B,JUN,LDLR,LY6E,MAP4K4,MSR1,NFKBIA,NLRP3,PPARD,PPARG,PTEN,PTPN1,RETN,S100A12,S100A8,S100A9,SLC1A3,SLC39A8,STAT3,STK17B,TNFAIP3,TNFSF13B,TPST1,VSIG4	49
Immunological Disease,Inflammatory Disease,Organismal Injury and Abnormalities	Immune mediated inflammatory disease	6.36e-22	Increased	2.002	ABCA1,ADAMTS2,ADGRE5,APOBEC3A,AREG,C1QA,C1QB,CD52,CD74,CFD,CTSB,EEF1A1,FCGR3A/FCGR3B,FKBP5,FOXO3,HIF1A,HLA-DPA1,HLA-DPB1,HLA-DQA1,HLA-DQA2,HLA-DQB1,HLA-DRA,HLA-DRB1,HLA-DRB5,HMOX1,HSPA1A/HSPA1B,HSPD1,IFI6,IL10,IL1B,JUN,KCNMA1,LY6E,MAP4K4,MT2A,NFKBIA,NLRP3,PDK4,PPARG,PTEN,PTPN1,PTPN2,RNASE2,S100A12,S100A8,S100A9,STAT3,STK17B,TNFAIP3,TNFSF13B,TPST1,VCL,VSIG4,WARS1	54
Immunological Disease,Organismal Injury and Abnormalities	Systemic autoimmune syndrome	1.22e-21		0.849	ABCA1,ADAMTS2,ADGRE5,APOBEC3A,AREG,C1QA,CD14,CD52,CD74,CFD,CTSB,FCGR3A/FCGR3B,FKBP5,FOXO3,HIF1A,HLA-DPA1,HLA-DPB1,HLA-DQA1,HLA-DQA2,HLA-DQB1,HLA-DRA,HLA-DRB1,HLA-DRB5,HMOX1,HSPA1A/HSPA1B,HSPD1,IFI6,IL10,IL1B,INSR,JUN,LY6E,MAP4K4,MT2A,NFKBIA,NLRP3,PPARG,PTPN1,PTPN2,RETN,RNASE2,S100A12,S100A4,S100A8,S100A9,SNHG32,STAT3,STK17B,TNFAIP3,TNFSF13B,TPST1,VSIG4,WARS1	53
Connective Tissue Disorders,Organismal Injury and Abnormalities,Skeletal and Muscular Disorders	Non-traumatic arthropathy	3.97e-21	Increased	2.228	ADAMTS2,ADGRE5,AREG,C1QA,CD74,CFD,CH25H,CTSB,FCGR3A/FCGR3B,FKBP5,FOXO3,HIF1A,HLA-DPA1,HLA-DPB1,HLA-DQA1,HLA-DQA2,HLA-DQB1,HLA-DRA,HLA-DRB1,HLA-DRB5,HMOX1,HSPA1A/HSPA1B,HSPD1,IL10,IL1B,LY6E,MAP4K4,NFKBIA,PPARD,PPARG,PTPN1,RETN,S100A12,S100A8,S100A9,SLC1A3,SLC39A8,STAT3,STK17B,TNFAIP3,TNFSF13B,TPST1,VSIG4	43
Infectious Diseases,Organismal Injury and Abnormalities	Viral Infection	1.22e-20		-1.398	ADAMTS2,ADGRE5,AMPH,ANPEP,AP1S2,CD14,CD74,CH25H,CTSB,DLGAP1,DNAJB1,EEF1A1,FCGR3A/FCGR3B,FKBP5,FOXO3,FTL,HIF1A,HLA-DPA1,HLA-DPB1,HLA-DQA1,HLA-DQB1,HLA-DRA,HLA-DRB1,HLA-DRB5,HMOX1,HSP90AA1,HSPA1A/HSPA1B,HSPD1,IFI6,IL10,IL1B,INSR,JUN,LDLR,LY6E,MAP4K4,MSR1,MT2A,NFKBIA,OXSR1,PELI1,PPARG,PRKCH,PTEN,PTPN1,RANBP2,RETN,RNASE2,RPS23,S100A12,S100A4,S100A8,S100A9,SERPINB9,SLC1A3,SNHG32,STAT3,TNFAIP3,TNFSF13B…	61
Connective Tissue Disorders,Immunological Disease,Inflammatory Disease,Inflammatory Response,Organismal Injury and Abnormalities,Skeletal and Muscular Disorders	Rheumatoid arthritis	4.43e-20		1.536	ADAMTS2,ADGRE5,AREG,C1QA,CD74,CFD,CTSB,FCGR3A/FCGR3B,FKBP5,FOXO3,HIF1A,HLA-DPA1,HLA-DPB1,HLA-DQA1,HLA-DQA2,HLA-DQB1,HLA-DRA,HLA-DRB1,HLA-DRB5,HMOX1,HSPA1A/HSPA1B,HSPD1,IL10,IL1B,LY6E,MAP4K4,NFKBIA,PPARG,PTPN1,S100A12,S100A8,S100A9,STAT3,STK17B,TNFAIP3,TNFSF13B,TPST1,VSIG4	38
Cell-To-Cell Signaling and Interaction,Hematological System Development and Function,Immune Cell Trafficking,Inflammatory Response	Activation of leukocytes	1.27e-18		-0.103	C1QA,CD14,CD74,FCGR3A/FCGR3B,FOXO3,HIF1A,HLA-DPA1,HLA-DPB1,HLA-DQA1,HLA-DQB1,HLA-DRA,HLA-DRB1,HMOX1,HSPA1A/HSPA1B,HSPD1,HSPH1,IL10,IL1B,JUN,LDLR,MSR1,NFKBIA,NLRP3,PDK4,PELI1,PPARG,PSME1,PTEN,RNASE2,S100A12,S100A8,S100A9,SERPINB9,STAT3,TNFAIP3,TNFSF13B,TXNIP,VAMP8	38
Inflammatory Disease,Organismal Injury and Abnormalities	Chronic inflammatory disorder	1.39e-18		0.309	ABCA1,ADAMTS2,ADGRE5,AREG,C1QA,CD52,CD74,CFD,CTSB,FCGR3A/FCGR3B,FKBP5,FOXO3,HIF1A,HLA-DPA1,HLA-DPB1,HLA-DQA1,HLA-DQA2,HLA-DQB1,HLA-DRA,HLA-DRB1,HLA-DRB5,HMOX1,HSPA1A/HSPA1B,HSPD1,IL10,IL1B,INSR,JUN,LY6E,MAP4K4,NFKBIA,NLRP3,PPARG,PTPN1,PTPN2,S100A12,S100A4,S100A8,S100A9,SLC1A3,STAT3,STK17B,TNFAIP3,TNFSF13B,TPST1,VSIG4	46
Cell-To-Cell Signaling and Interaction,Hematological System Development and Function	Activation of blood cells	2.35e-18		-0.098	C1QA,CD14,CD74,FCGR3A/FCGR3B,FOXO3,HIF1A,HLA-DPA1,HLA-DPB1,HLA-DQA1,HLA-DQB1,HLA-DRA,HLA-DRB1,HMOX1,HSPA1A/HSPA1B,HSPD1,HSPH1,IL10,IL1B,JUN,LDLR,MSR1,NFKBIA,NLRP3,PDK4,PELI1,PPARG,PSME1,PTEN,RETN,RNASE2,S100A12,S100A8,S100A9,SERPINB9,STAT3,TNFAIP3,TNFSF13B,TXNIP,VAMP8	39
Cellular Movement,Immune Cell Trafficking	Leukocyte migration	1.03e-17		-1.088	ABCA1,ADGRE5,AREG,CD14,CD74,CFD,CH25H,CTSB,FCGR3A/FCGR3B,HIF1A,HLA-DQB1,HMOX1,HSP90AA1,HSPA1A/HSPA1B,HSPD1,IL10,IL1B,INSR,JUN,LDLR,LITAF,MAP4K3,MSR1,MYO9B,NFKBIA,NLRP3,PDK4,PELI1,PPARD,PPARG,PTEN,PTPN1,PTPN2,RETN,RNASE2,S100A12,S100A4,S100A8,S100A9,STAT3,TNFAIP3,TNFSF13B	42
Cell-To-Cell Signaling and Interaction	Activation of cells	5.96e-17		-0.669	AREG,ATF6,C1QA,CD14,CD74,FCGR3A/FCGR3B,FOXO3,HIF1A,HLA-DPA1,HLA-DPB1,HLA-DQA1,HLA-DQB1,HLA-DRA,HLA-DRB1,HMOX1,HSPA1A/HSPA1B,HSPD1,HSPH1,IL10,IL1B,INSR,JUN,KCNMA1,LDLR,MSR1,NFKBIA,NLRP3,PDK4,PELI1,PPARG,PSME1,PTEN,RETN,RNASE2,S100A12,S100A8,S100A9,SERPINB9,STAT3,TNFAIP3,TNFSF13B,TXNIP,VAMP8	43
Cellular Movement,Hematological System Development and Function,Immune Cell Trafficking	Cell movement of leukocytes	8.2e-17		-0.673	ABCA1,AREG,CD14,CD74,CFD,CH25H,CTSB,HIF1A,HLA-DQB1,HMOX1,HSP90AA1,HSPD1,IL10,IL1B,INSR,JUN,LDLR,LITAF,MAP4K3,MSR1,MYO9B,NFKBIA,NLRP3,PDK4,PELI1,PPARD,PPARG,PTEN,PTPN1,PTPN2,RETN,RNASE2,S100A12,S100A4,S100A8,S100A9,STAT3,TNFAIP3,TNFSF13B	39
Cell-To-Cell Signaling and Interaction,Hematological System Development and Function,Immune Cell Trafficking,Inflammatory Response	Activation of mononuclear leukocytes	1.01e-16		-0.007	C1QA,CD14,CD74,FCGR3A/FCGR3B,FOXO3,HIF1A,HLA-DPA1,HLA-DPB1,HLA-DQB1,HLA-DRA,HLA-DRB1,HSPA1A/HSPA1B,HSPD1,HSPH1,IL10,IL1B,LDLR,NFKBIA,NLRP3,PELI1,PPARG,PTEN,S100A12,S100A9,SERPINB9,STAT3,TNFAIP3,TNFSF13B,TXNIP,VAMP8	30
Inflammatory Response	Immune response of cells	1.77e-16		-0.727	ABCA1,ANPEP,C1QA,CD14,CD74,CH25H,CTSB,FCGR3A/FCGR3B,HIF1A,HLA-DQB1,HMOX1,HSP90AA1,IGHA1,IL10,IL1B,IL1RAP,JUN,LDLR,LITAF,MBNL1,MSR1,MYO9B,NFKBIA,NLRP3,PELI1,PPARG,PTEN,S100A12,S100A8,S100A9,SERPINB9,STAT3,VAMP8	33
Cellular Development,Cellular Growth and Proliferation,Hematological System Development and Function,Lymphoid Tissue Structure and Development	Cell proliferation of T lymphocytes	2.3e-16		1.201	CD14,CD74,FOXO3,FTL,HIF1A,HLA-DPA1,HLA-DPB1,HLA-DQA1,HLA-DQB1,HLA-DRB1,HMOX1,HSPA1A/HSPA1B,HSPD1,IL10,IL1B,INSR,JUN,NFKBIA,PELI1,PPARD,PPARG,PRKCH,PTEN,PTPN2,SERPINB9,STAT3,STK17B,TNFAIP3,TNFSF13B,TXNIP,VSIG4,ZBTB16	32
Infectious Diseases,Organismal Injury and Abnormalities	Severe COVID-19	2.52e-16			AP1S2,CD74,EEF1A1,FCGR3A/FCGR3B,HLA-DPA1,HLA-DPB1,HLA-DQB1,HLA-DRA,HLA-DRB1,HLA-DRB5,IFI6,IL10,IL1B,RNASE2,S100A12,S100A8,S100A9,TXNIP	18
Cancer,Organismal Injury and Abnormalities	Malignant genitourinary solid tumor	3.86e-16		-1.685	ABCA1,ACOT7,ADAMTS2,ADGRE5,AGTPBP1,AMPH,ANKRD28,ANPEP,AP1S2,APOBEC3A,AREG,ARHGAP26,ATF6,BAIAP2L1,BLVRB,C1QA,C1QC,CD14,CD163L1,CD52,CD74,CH25H,CMIP,CRYBG1,CTSB,DENND4A,DLGAP1,EEF1A1,FAM20A,FCGR3A/FCGR3B,FKBP5,FLVCR2,FNDC3A,FOXO3,GAS7,HIF1A,HLA-DPA1,HLA-DPB1,HLA-DQA1,HLA-DQA2,HLA-DQB1,HLA-DRA,HLA-DRB1,HLA-DRB5,HMOX1,HSP90AA1,HSPA1A/HSPA1B,HSPD1,HSPH1,IFI6,IL10,IL1B,IL1RAP,INSR,JARID2,JUN,KCNMA1,LDL…	117
Cellular Development,Cellular Growth and Proliferation,Hematological System Development and Function,Lymphoid Tissue Structure and Development	Proliferation of immune cells	5.31e-16		0.653	ANPEP,CD14,CD74,FCGR3A/FCGR3B,FOXO3,FTL,HIF1A,HLA-DPA1,HLA-DPB1,HLA-DQA1,HLA-DQB1,HLA-DRB1,HMOX1,HSPA1A/HSPA1B,HSPD1,IL10,IL1B,INSR,JUN,LDLR,NFKBIA,PELI1,PPARD,PPARG,PRKCH,PTEN,PTPN2,S100A9,SERPINB9,STAT3,STK17B,TNFAIP3,TNFSF13B,TXNIP,VSIG4,ZBTB16	36
Infectious Diseases,Organismal Injury and Abnormalities	Infection by coronavirus	5.6e-16			ADAMTS2,ANPEP,AP1S2,CD74,EEF1A1,FCGR3A/FCGR3B,FKBP5,HLA-DPA1,HLA-DPB1,HLA-DQB1,HLA-DRA,HLA-DRB1,HLA-DRB5,HSPA1A/HSPA1B,IFI6,IL10,IL1B,PPARG,PTEN,RNASE2,S100A12,S100A8,S100A9,SLC1A3,TNFAIP3,TNFSF13B,TXNIP	27
Endocrine System Disorders,Gastrointestinal Disease,Metabolic Disease,Organismal Injury and Abnormalities	Diabetes mellitus	6.42e-16		-1.429	ABCA1,ADAMTS2,ANPEP,APOO,ATF6,CD52,CD74,CFD,CTSB,FCGR3A/FCGR3B,FKBP5,FOXO3,HLA-DPA1,HLA-DPB1,HLA-DQA1,HLA-DQA2,HLA-DQB1,HLA-DRA,HLA-DRB5,HSPA1A/HSPA1B,IL10,IL1B,INSR,JUN,KCNMA1,LDLR,MSR1,MT-TE,MT2A,NFKBIA,NLRP3,NPL,PDK4,PPARD,PPARG,PTEN,PTPN1,PTPN2,RETN,S100A4,SLC1A3,SLC39A8,SNHG32,SRGAP2,STAT3,TNFSF13B,TXNIP,ZBTB16	48
Neurological Disease,Organismal Injury and Abnormalities	Progressive neurological disorder	7.79e-16			ABCA1,AMPH,AP1S2,AREG,CD14,CD52,CD74,CFD,CH25H,CTSB,EEF1A1,FCGR3A/FCGR3B,FKBP5,FOXO3,FTL,GAS7,HIF1A,HLA-DQA1,HLA-DQA2,HLA-DQB1,HLA-DRA,HLA-DRB1,HMOX1,HSP90AA1,HSPA1A/HSPA1B,HSPD1,IL10,IL1B,INSR,JUN,KCNMA1,LDLR,LY6E,MT-TP,NLRP3,OOEP,PPARG,PTEN,S100A4,S100A9,SLC1A3,STAT3,USP36	43
Metabolic Disease,Organismal Injury and Abnormalities	Glucose metabolism disorder	1.34e-15		-1.307	ABCA1,ADAMTS2,ANPEP,APOO,ATF6,BAIAP2L1,C1QA,CD52,CD74,CFD,CTSB,FCGR3A/FCGR3B,FKBP5,FOXO3,HLA-DPA1,HLA-DPB1,HLA-DQA1,HLA-DQA2,HLA-DQB1,HLA-DRA,HLA-DRB5,HSPA1A/HSPA1B,IL10,IL1B,INSR,JUN,KCNMA1,LDLR,MSR1,MT-TE,MT2A,NFKBIA,NLRP3,NPL,PDK4,PPARD,PPARG,PTEN,PTPN1,PTPN2,RETN,S100A4,S100A8,SLC1A3,SLC39A8,SNHG32,SRGAP2,STAT3,TNFSF13B,TPST1,TXNIP,ZBTB16	52
Infectious Diseases,Organismal Injury and Abnormalities	Infection by RNA virus	1.4e-15		0.004	ADAMTS2,ADGRE5,AMPH,ANPEP,AP1S2,CD14,CD74,CTSB,DLGAP1,DNAJB1,EEF1A1,FCGR3A/FCGR3B,FKBP5,HIF1A,HLA-DPA1,HLA-DPB1,HLA-DQB1,HLA-DRA,HLA-DRB1,HLA-DRB5,HSPA1A/HSPA1B,IFI6,IL10,IL1B,INSR,MT2A,PELI1,PPARG,PRKCH,PTEN,RANBP2,RNASE2,S100A12,S100A4,S100A8,S100A9,SERPINB9,SLC1A3,SNHG32,TNFAIP3,TNFSF13B,TXNIP	42
Immunological Disease,Organismal Injury and Abnormalities	Allergy	1.55e-15		0.4	ABCA1,CD74,EEF1A1,HLA-DPB1,HLA-DQA1,HLA-DQB1,HLA-DRA,HLA-DRB1,HLA-DRB5,IFI6,IL10,IL1B,JUN,KCNMA1,LDLR,MYO9B,NFKBIA,PDK4,PELI1,PPARG,PTEN,S100A8,S100A9,TNFAIP3,VCL,WARS1	26
Cellular Function and Maintenance	Cellular homeostasis	1.77e-15		-0.313	ABCA1,ATF6,CD52,CD74,CTSB,DLGAP1,DNAJB1,FAM20A,FCGR3A/FCGR3B,FOXO3,FTL,HIF1A,HLA-DQA1,HLA-DQB1,HLA-DRA,HLA-DRB1,HMOX1,HSP90AA1,HSPD1,IFI6,IL10,IL1B,INSR,JUN,KCNMA1,LDLR,LGALS2,MSR1,MT-TE,MT2A,NFKBIA,NLRP3,PDK4,PID1,PPARD,PPARG,PRKCH,PTEN,PTPN2,RETN,RNASE1,S100A4,S100A8,S100A9,SLC1A3,SLC39A8,STAT3,TBC1D14,TNFAIP3,TNFSF13B,TXNIP,USP36,ZBTB16	53
Cell-To-Cell Signaling and Interaction,Hematological System Development and Function,Immune Cell Trafficking,Inflammatory Response	Activation of lymphocytes	2.05e-15		0.302	C1QA,CD74,FCGR3A/FCGR3B,FOXO3,HIF1A,HLA-DPA1,HLA-DPB1,HLA-DQB1,HLA-DRA,HLA-DRB1,HSPA1A/HSPA1B,HSPD1,HSPH1,IL10,IL1B,LDLR,NFKBIA,NLRP3,PELI1,PPARG,PTEN,S100A9,SERPINB9,STAT3,TNFAIP3,TNFSF13B,TXNIP,VAMP8	28
Hematological System Development and Function,Tissue Morphology	Quantity of leukocytes	2.89e-15		-0.431	ABCA1,ADGRE5,ANPEP,C1QA,CD74,CTSB,FOXO3,HIF1A,HLA-DQA1,HLA-DQB1,HLA-DRB1,HMOX1,HSPD1,IGHA1,IL10,IL1B,INSR,JARID2,LDLR,LGALS2,LITAF,MYO9B,NFKBIA,NLRP3,PELI1,PPARD,PPARG,PRKCH,PTEN,PTPN2,S100A8,S100A9,SLC39A8,STAT3,STK17B,TNFAIP3,TNFSF13B,TXNIP,VSIG4	39
Cellular Development,Cellular Growth and Proliferation,Hematological System Development and Function,Lymphoid Tissue Structure and Development	Proliferation of mononuclear leukocytes	3.58e-15		0.675	ANPEP,CD14,CD74,FCGR3A/FCGR3B,FOXO3,FTL,HIF1A,HLA-DPA1,HLA-DPB1,HLA-DQA1,HLA-DQB1,HLA-DRB1,HMOX1,HSPA1A/HSPA1B,HSPD1,IL10,IL1B,INSR,JUN,NFKBIA,PELI1,PPARD,PPARG,PRKCH,PTEN,PTPN2,SERPINB9,STAT3,STK17B,TNFAIP3,TNFSF13B,TXNIP,VSIG4,ZBTB16	34
Hematological System Development and Function,Tissue Morphology	Quantity of blood cells	3.7e-15		-0.423	ABCA1,ADGRE5,ANPEP,C1QA,CD74,CTSB,FOXO3,HIF1A,HLA-DQA1,HLA-DQB1,HLA-DRB1,HMOX1,HSPD1,IGHA1,IL10,IL1B,INSR,JARID2,JUN,LDLR,LGALS2,LITAF,MYO9B,NFKBIA,NLRP3,PELI1,PPARD,PPARG,PRKCH,PTEN,PTPN2,S100A8,S100A9,SLC39A8,STAT3,STK17B,TNFAIP3,TNFSF13B,TXNIP,VSIG4,ZBTB16	41
Cancer,Organismal Injury and Abnormalities,Reproductive System Disease	Breast or gynecological cancer	4.32e-15		-1.553	ABCA1,ADAMTS2,AGTPBP1,AMPH,ANKRD28,ANPEP,AP1S2,APOBEC3A,AREG,ARHGAP26,ATF6,BAIAP2L1,C1QA,C1QC,CD14,CD163L1,CD74,CRYBG1,CTSB,DENND4A,DLGAP1,FAM20A,FCGR3A/FCGR3B,FKBP5,FLVCR2,FNDC3A,FOXO3,GAS7,HIF1A,HLA-DPA1,HLA-DPB1,HLA-DQA1,HLA-DQA2,HLA-DRB1,HLA-DRB5,HMOX1,HSP90AA1,HSPA1A/HSPA1B,HSPD1,HSPH1,IFI6,IL10,IL1B,IL1RAP,INSR,JARID2,JUN,KCNMA1,LDLR,LGALS2,LRRFIP1,LY6E,MAP4K3,MAP4K4,MBNL1,MSR1,MT-TE,MT2A,M…	103
Dermatological Diseases and Conditions,Inflammatory Disease,Inflammatory Response,Organismal Injury and Abnormalities	Dermatitis	4.83e-15		-0.343	ABCA1,APOBEC3A,AREG,CD74,EEF1A1,FOXO3,HLA-DQA1,HLA-DQB1,HLA-DRA,HLA-DRB1,HLA-DRB5,IFI6,IL10,IL1B,INSR,JUN,LDLR,NFKBIA,NLRP3,PDK4,PPARD,PPARG,S100A8,S100A9,TNFAIP3,VCL,WARS1	27
Infectious Diseases,Organismal Injury and Abnormalities	COVID-19	7.53e-15			ADAMTS2,AP1S2,CD74,EEF1A1,FCGR3A/FCGR3B,FKBP5,HLA-DPA1,HLA-DPB1,HLA-DQB1,HLA-DRA,HLA-DRB1,HLA-DRB5,HSPA1A/HSPA1B,IFI6,IL10,IL1B,PPARG,PTEN,RNASE2,S100A12,S100A8,S100A9,SLC1A3,TNFSF13B,TXNIP	25
Hematological System Development and Function,Lymphoid Tissue Structure and Development,Tissue Morphology	Quantity of T lymphocytes	1.25e-14		0.828	ANPEP,CD74,FOXO3,HIF1A,HLA-DQA1,HLA-DQB1,HLA-DRB1,HSPD1,IL10,INSR,LDLR,LGALS2,MYO9B,NFKBIA,NLRP3,PELI1,PPARD,PPARG,PRKCH,PTEN,PTPN2,S100A8,S100A9,STAT3,STK17B,TNFAIP3,TNFSF13B,TXNIP,VSIG4	29
Cellular Development,Cellular Growth and Proliferation,Hematological System Development and Function,Lymphoid Tissue Structure and Development	Proliferation of lymphocytes	1.48e-14		0.909	CD14,CD74,FCGR3A/FCGR3B,FOXO3,FTL,HIF1A,HLA-DPA1,HLA-DPB1,HLA-DQA1,HLA-DQB1,HLA-DRB1,HMOX1,HSPA1A/HSPA1B,HSPD1,IL10,IL1B,INSR,JUN,NFKBIA,PELI1,PPARD,PPARG,PRKCH,PTEN,PTPN2,SERPINB9,STAT3,STK17B,TNFAIP3,TNFSF13B,TXNIP,VSIG4,ZBTB16	33
Dermatological Diseases and Conditions,Immunological Disease,Inflammatory Disease,Organismal Injury and Abnormalities	Lichen planus	1.6e-14			CD52,CD74,CFD,EEF1A1,HLA-DPA1,HLA-DPB1,HLA-DQB1,HLA-DRA,HLA-DRB1,IFI6,JUN,S100A8,S100A9	13
Hematological System Development and Function,Lymphoid Tissue Structure and Development,Tissue Morphology	Quantity of CD4+ T-lymphocytes	2.59e-14		1.512	ANPEP,CD74,HIF1A,HLA-DQA1,HLA-DQB1,IL10,LDLR,LGALS2,MYO9B,PELI1,PPARD,PRKCH,PTEN,PTPN2,S100A8,S100A9,STAT3,STK17B,VSIG4	19
Inflammatory Response	Inflammatory response	2.85e-14		-0.906	ADGRE5,C1QA,CD14,CD74,CH25H,CTSB,FCGR3A/FCGR3B,FOXO3,HMOX1,HSPD1,IL10,IL1B,JUN,LDLR,LGALS2,LITAF,MSR1,MYO9B,NFKBIA,NLRP3,PDK4,PELI1,PPARD,PPARG,PTEN,PTPN2,RNASE2,S100A12,S100A4,S100A8,S100A9,STAT3,TNFAIP3,TPST1,ZBTB16	35
Inflammatory Response,Organismal Injury and Abnormalities	Inflammation of organ	3.42e-14		0.517	ABCA1,APOBEC3A,AREG,C1QA,CD14,CD74,CH25H,CTSB,EEF1A1,FCGR3A/FCGR3B,FOXO3,HIF1A,HLA-DQA1,HLA-DQB1,HLA-DRA,HLA-DRB1,HLA-DRB5,HMOX1,HSPD1,IFI6,IL10,IL1B,INSR,JUN,KCNMA1,LDLR,LGALS2,NFKBIA,NLRP3,PDK4,PELI1,PPARD,PPARG,PTEN,PTPN1,PTPN2,S100A4,S100A8,S100A9,SLC1A3,SLC39A8,STAT3,STK17B,TNFAIP3,TNFSF13B,VCL,VSIG4,WARS1	48
Cellular Movement	Cellular infiltration	4.43e-14		0.395	AREG,CD14,CFD,CTSB,HIF1A,HMOX1,HSPD1,IL10,IL1B,IL1RAP,JUN,LDLR,MAP4K3,MSR1,NFKBIA,NLRP3,PDK4,PELI1,PPARG,PTEN,PTPN1,RETN,S100A4,S100A8,S100A9,STAT3,TNFAIP3,TNFSF13B	28
Cancer,Organismal Injury and Abnormalities	Pelvic cancer	4.45e-14			ABCA1,ACOT7,ADAMTS2,ADGRE5,AGTPBP1,AMPH,ANKRD28,ANPEP,AP1S2,APOBEC3A,ARHGAP26,ATF6,BAIAP2L1,C1QC,CD14,CD163L1,CD52,CD74,CH25H,CMIP,CRYBG1,CTSB,DENND4A,DLGAP1,EEF1A1,FAM20A,FCGR3A/FCGR3B,FKBP5,FLVCR2,FNDC3A,FOXO3,HIF1A,HLA-DPA1,HLA-DPB1,HLA-DQA1,HLA-DQA2,HLA-DQB1,HLA-DRA,HLA-DRB1,HMOX1,HSP90AA1,HSPA1A/HSPA1B,HSPD1,HSPH1,IFI6,IL10,IL1B,IL1RAP,INSR,JARID2,JUN,KCNMA1,LDLR,LITAF,LRRFIP1,LY6E,MAP4K3,MA…	107
Cellular Movement,Hematological System Development and Function,Immune Cell Trafficking,Inflammatory Response	Cell movement of macrophages	4.68e-14		-0.679	AREG,CD14,CD74,CFD,HIF1A,HMOX1,IL10,IL1B,LDLR,LITAF,MYO9B,NLRP3,PDK4,PPARD,PPARG,PTEN,PTPN1,RETN,S100A4,S100A8,STAT3,TNFAIP3	22
Metabolic Disease,Neurological Disease,Organismal Injury and Abnormalities,Psychological Disorders	Alzheimer disease	5.13e-14			ABCA1,AMPH,CD14,CD74,CFD,CH25H,CTSB,FCGR3A/FCGR3B,FKBP5,FOXO3,GAS7,HIF1A,HLA-DQA1,HLA-DQB1,HMOX1,HSPA1A/HSPA1B,HSPD1,IL10,IL1B,INSR,JUN,LDLR,LY6E,OOEP,PPARG,PTEN,S100A9,SLC1A3,STAT3	29
Neurological Disease,Organismal Injury and Abnormalities,Psychological Disorders	Dementia	6.06e-14			ABCA1,AMPH,CD14,CD74,CFD,CH25H,CTSB,FCGR3A/FCGR3B,FKBP5,FOXO3,GAS7,HIF1A,HLA-DQA1,HLA-DQB1,HMOX1,HSPA1A/HSPA1B,HSPD1,IL10,IL1B,INSR,JUN,LDLR,LY6E,MT-TE,MT-TP,OOEP,PPARG,PTEN,S100A9,SLC1A3,STAT3	31
Cancer,Organismal Injury and Abnormalities	Lymphoreticular neoplasm	7.53e-14		0.365	ABCA1,AMPH,ANPEP,APOBEC3A,ARHGAP26,CD14,CD52,CD74,CMIP,CRYBG1,DENND4A,EEF1A1,FCGR3A/FCGR3B,FOXO3,HIF1A,HLA-DPB1,HLA-DQA1,HLA-DQA2,HLA-DQB1,HLA-DRA,HLA-DRB1,HMOX1,HSP90AA1,HSPA1A/HSPA1B,HSPD1,HSPH1,IFI6,IGHA1,IL10,IL1B,IL1RAP,INSR,JARID2,JUN,LDLR,LRRFIP1,LY6E,MAP4K3,MAP4K4,MSR1,NFKBIA,NLRP3,PCNX1,PDK4,PKP2,POLR2J2/POLR2J3,PPARG,PSME1,PTEN,PTPN1,RANBP2,RPS23,S100A4,SNHG5,STAT3,STK17B,TAOK3,TEX14,TN…	63
Hematological System Development and Function,Tissue Morphology	Quantity of mononuclear leukocytes	8.84e-14		0.582	ANPEP,CD74,CTSB,FOXO3,HIF1A,HLA-DQA1,HLA-DQB1,HLA-DRB1,HSPD1,IGHA1,IL10,IL1B,INSR,JARID2,LDLR,LGALS2,MYO9B,NFKBIA,NLRP3,PELI1,PPARD,PPARG,PRKCH,PTEN,PTPN2,S100A8,S100A9,STAT3,STK17B,TNFAIP3,TNFSF13B,TXNIP,VSIG4	33
Cellular Movement	Migration of cells	1.36e-13		-1.773	ABCA1,ADGRE5,ANKRD28,ANPEP,AP1S2,AREG,CD14,CD74,CFD,CH25H,CTSB,DLGAP1,FCGR3A/FCGR3B,FOXO3,HIF1A,HLA-DQB1,HMOX1,HSP90AA1,HSPA1A/HSPA1B,HSPD1,IL10,IL1B,INSR,JUN,KCNMA1,LDLR,LITAF,MAP4K3,MAP4K4,MBNL1,MSR1,MYO9B,NFKBIA,NLRP3,PDK4,PELI1,PKP2,PPARD,PPARG,PTEN,PTPN1,PTPN2,RANBP2,RETN,RNASE2,S100A12,S100A4,S100A8,S100A9,SLC1A3,SRGAP2,STAT3,TNFAIP3,TNFSF13B,VCL,WARS1,ZBTB16	57
Cancer,Organismal Injury and Abnormalities	Anogenital cancer	1.38e-13		-1.82	ABCA1,ACOT7,ADAMTS2,ADGRE5,AGTPBP1,AMPH,ANKRD28,ANPEP,AP1S2,APOBEC3A,AREG,ARHGAP26,ATF6,BAIAP2L1,C1QA,C1QC,CD14,CD163L1,CD52,CD74,CMIP,CRYBG1,CTSB,DENND4A,DLGAP1,FAM20A,FCGR3A/FCGR3B,FKBP5,FLVCR2,FNDC3A,FOXO3,GAS7,HIF1A,HLA-DPA1,HLA-DPB1,HLA-DQA1,HLA-DQA2,HLA-DRB1,HLA-DRB5,HMOX1,HSP90AA1,HSPA1A/HSPA1B,HSPD1,HSPH1,IFI6,IL10,IL1B,IL1RAP,INSR,JARID2,JUN,KCNMA1,LDLR,LGALS2,LITAF,LRRFIP1,LY6E,MAP4K3,M…	109
Hematological System Development and Function,Lymphoid Tissue Structure and Development,Tissue Morphology	Quantity of lymphocytes	1.43e-13		0.917	ANPEP,CD74,CTSB,FOXO3,HIF1A,HLA-DQA1,HLA-DQB1,HLA-DRB1,HSPD1,IGHA1,IL10,IL1B,INSR,LDLR,LGALS2,MYO9B,NFKBIA,NLRP3,PELI1,PPARD,PPARG,PRKCH,PTEN,PTPN2,S100A8,S100A9,STAT3,STK17B,TNFAIP3,TNFSF13B,TXNIP,VSIG4	32
Cellular Movement,Hematological System Development and Function,Immune Cell Trafficking	Cell movement of antigen presenting cells	1.44e-13		-1.137	AREG,CD14,CD74,CFD,HIF1A,HLA-DQB1,HMOX1,IL10,IL1B,LDLR,LITAF,MYO9B,NLRP3,PDK4,PPARD,PPARG,PTEN,PTPN1,RETN,RNASE2,S100A4,S100A8,STAT3,TNFAIP3	24
Cancer,Organismal Injury and Abnormalities	Hematological or lymphatic system tumor	1.53e-13		0.702	ABCA1,AMPH,ANPEP,APOBEC3A,ARHGAP26,ATF6,C1QC,CD14,CD163L1,CD52,CD74,CMIP,CRYBG1,DENND4A,DLGAP1,EEF1A1,FCGR3A/FCGR3B,FOXO3,HIF1A,HLA-DPB1,HLA-DQA1,HLA-DQA2,HLA-DQB1,HLA-DRA,HLA-DRB1,HMOX1,HSP90AA1,HSPA1A/HSPA1B,HSPD1,HSPH1,IFI6,IGHA1,IL10,IL1B,IL1RAP,INSR,JARID2,JUN,KCNMA1,LDLR,LRRFIP1,LY6E,MAP4K3,MAP4K4,MSR1,NFKBIA,NLRP3,NOCT,PCNX1,PDK4,PELI1,PKP2,POLR2J2/POLR2J3,PPARG,PSME1,PTEN,PTPN1,PTPN2,RANB…	74
Connective Tissue Disorders,Inflammatory Disease,Inflammatory Response,Organismal Injury and Abnormalities,Skeletal and Muscular Disorders	Polyarthritis	1.57e-13		0	ADGRE5,CD74,HIF1A,HLA-DQA1,HLA-DRA,HSPA1A/HSPA1B,IL10,IL1B,NFKBIA,PTEN,S100A12,S100A8,S100A9,STAT3,TNFAIP3,TNFSF13B	16
Cell Death and Survival,Organismal Injury and Abnormalities	Apoptosis of tumor cell lines	1.76e-13		0.5	ABCA1,APOBEC3A,AREG,ATF6,CD14,CD74,CTSB,DNAJB1,EEF1A1,FKBP5,FNDC3A,FOXO3,GAS7,HIF1A,HLA-DQB1,HMOX1,HSPA1A/HSPA1B,HSPD1,IFI6,IL10,IL1B,INSR,JUN,MSR1,MT2A,NFKBIA,PPARD,PPARG,PTEN,PTPN1,PTPN2,RETN,RNASE1,S100A4,S100A8,S100A9,SERPINB9,SNHG5,STAT3,TAOK3,TNFAIP3,TNFSF13B,USP36,ZBTB16	44
Cellular Movement,Hematological System Development and Function,Immune Cell Trafficking	Cellular infiltration by leukocytes	1.95e-13		0.422	AREG,CD14,CFD,CTSB,HIF1A,HMOX1,HSPD1,IL10,IL1B,LDLR,MAP4K3,MSR1,NFKBIA,NLRP3,PDK4,PELI1,PPARG,PTEN,PTPN1,RETN,S100A4,S100A8,S100A9,STAT3,TNFAIP3,TNFSF13B	26
Cancer,Hematological Disease,Organismal Injury and Abnormalities	Myeloid or lymphoid neoplasm	2.01e-13		0.926	ABCA1,AMPH,ANPEP,APOBEC3A,ARHGAP26,ATF6,C1QC,CD14,CD163L1,CD52,CD74,CMIP,CRYBG1,DENND4A,DLGAP1,EEF1A1,FCGR3A/FCGR3B,FOXO3,HIF1A,HLA-DPB1,HLA-DQA1,HLA-DQA2,HLA-DQB1,HLA-DRA,HLA-DRB1,HMOX1,HSP90AA1,HSPA1A/HSPA1B,HSPD1,HSPH1,IFI6,IGHA1,IL10,IL1B,IL1RAP,INSR,JARID2,JUN,KCNMA1,LDLR,LRRFIP1,LY6E,MAP4K3,MAP4K4,MSR1,NFKBIA,NOCT,PCNX1,PDK4,PELI1,PKP2,POLR2J2/POLR2J3,PPARG,PSME1,PTEN,PTPN1,PTPN2,RANBP2,RPS…	73
Neurological Disease,Organismal Injury and Abnormalities	Progressive encephalopathy	3.4e-13			ABCA1,AMPH,AP1S2,CD14,CD74,CFD,CH25H,CTSB,EEF1A1,FCGR3A/FCGR3B,FKBP5,FOXO3,FTL,GAS7,HIF1A,HLA-DQA1,HLA-DQB1,HLA-DRA,HMOX1,HSPA1A/HSPA1B,HSPD1,IL10,IL1B,INSR,JUN,LDLR,LY6E,MT-TP,OOEP,PPARG,PTEN,S100A4,S100A9,SLC1A3,STAT3,USP36	36
Cell Death and Survival,Organismal Injury and Abnormalities	Cell death of tumor cell lines	3.66e-13		0.893	ABCA1,APOBEC3A,AREG,ATF6,CD14,CD74,CTSB,DNAJB1,EEF1A1,FKBP5,FNDC3A,FOXO3,GAS7,HIF1A,HLA-DQB1,HMOX1,HSP90AA1,HSPA1A/HSPA1B,HSPD1,HSPH1,IFI6,IL10,IL1B,INSR,JUN,MSR1,MT2A,NFKBIA,NLRP3,PELI1,PPARD,PPARG,PRKCH,PTEN,PTPN1,PTPN2,RETN,RNASE1,S100A4,S100A8,S100A9,SERPINB9,SNHG5,STAT3,TAOK3,TNFAIP3,TNFSF13B,USP36,ZBTB16	49
Cell Death and Survival,Organismal Injury and Abnormalities	Cell death of macrophages	4e-13		0.374	C1QA,CD14,CTSB,HIF1A,HMOX1,IL10,IL1B,LDLR,MSR1,NFKBIA,NLRP3,PPARG,PTEN,STAT3,TNFAIP3	15
Cellular Movement,Hematological System Development and Function,Immune Cell Trafficking,Inflammatory Response	Cell movement of phagocytes	4.73e-13		-0.997	ABCA1,AREG,CD14,CD74,CFD,CTSB,HIF1A,HLA-DQB1,HMOX1,IL10,IL1B,LDLR,LITAF,MYO9B,NFKBIA,NLRP3,PDK4,PPARD,PPARG,PTEN,PTPN1,RETN,RNASE2,S100A12,S100A4,S100A8,S100A9,STAT3,TNFAIP3	29
Cancer,Hematological Disease,Organismal Injury and Abnormalities	Hematologic cancer	4.86e-13		0.736	ABCA1,AMPH,ANPEP,APOBEC3A,ARHGAP26,ATF6,C1QC,CD14,CD163L1,CD52,CD74,CMIP,CRYBG1,DENND4A,DLGAP1,EEF1A1,FCGR3A/FCGR3B,FOXO3,HIF1A,HLA-DPB1,HLA-DQA1,HLA-DQA2,HLA-DQB1,HLA-DRA,HLA-DRB1,HMOX1,HSP90AA1,HSPA1A/HSPA1B,HSPD1,HSPH1,IFI6,IGHA1,IL10,IL1B,IL1RAP,INSR,JARID2,JUN,LDLR,LRRFIP1,LY6E,MAP4K3,MAP4K4,MSR1,NFKBIA,NOCT,PCNX1,PDK4,PELI1,PKP2,POLR2J2/POLR2J3,PPARG,PSME1,PTEN,PTPN1,PTPN2,RANBP2,RPS23,S100…	72
Cancer,Organismal Injury and Abnormalities,Reproductive System Disease	Breast cancer	5.21e-13		-1.522	ABCA1,ADAMTS2,AGTPBP1,AMPH,ANPEP,AREG,BAIAP2L1,C1QA,CD14,CTSB,FCGR3A/FCGR3B,FKBP5,FNDC3A,FOXO3,GAS7,HIF1A,HLA-DQA1,HLA-DRB1,HLA-DRB5,HMOX1,HSP90AA1,HSPD1,IL1B,IL1RAP,INSR,JARID2,JUN,KCNMA1,LGALS2,LRRFIP1,LY6E,MAP4K3,MBNL1,MT-TE,MT2A,MYO9B,NFKBIA,NLRP3,NOCT,OOEP,OXSR1,PDK4,PELI1,PID1,PKP2,POLR2J2/POLR2J3,PPARG,PRKCH,PTEN,PTPN1,RANBP2,RBM47,S100A4,S100A8,S100A9,SRGAP2,STAT3,STK17B,TAOK3,TEX14,UBC,U…	65
Cell Death and Survival	Apoptosis	5.6e-13		0.615	ABCA1,ANPEP,APOBEC3A,AREG,ATF6,C1QA,CD14,CD74,CMIP,CTSB,DNAJB1,EEF1A1,FCGR3A/FCGR3B,FKBP5,FNDC3A,FOXO3,GAS7,HIF1A,HLA-DQB1,HMOX1,HSP90AA1,HSPA1A/HSPA1B,HSPD1,HSPH1,IFI6,IL10,IL1B,INSR,JUN,KCNMA1,LDLR,LGALS2,MAP4K4,MSR1,MT2A,NFKBIA,NLRP3,PDK4,PELI1,PKP2,PPARD,PPARG,PRKCH,PTEN,PTPN1,PTPN2,RETN,RNASE1,S100A4,S100A8,S100A9,SERPINB9,SLC1A3,SNHG5,STAT3,STK17B,TAOK3,TNFAIP3,TNFSF13B,TXNIP,USP36,VCL,ZBTB…	63
Cancer,Organismal Injury and Abnormalities,Reproductive System Disease	Genital tract cancer	5.61e-13			ABCA1,ACOT7,ADAMTS2,ADGRE5,AGTPBP1,AMPH,ANKRD28,AP1S2,APOBEC3A,ARHGAP26,ATF6,BAIAP2L1,C1QC,CD14,CD163L1,CD52,CD74,CMIP,CRYBG1,CTSB,DENND4A,DLGAP1,FAM20A,FCGR3A/FCGR3B,FKBP5,FLVCR2,FNDC3A,FOXO3,HIF1A,HLA-DPA1,HLA-DPB1,HLA-DQA1,HLA-DQA2,HLA-DRB1,HMOX1,HSP90AA1,HSPA1A/HSPA1B,HSPD1,HSPH1,IFI6,IL10,IL1B,IL1RAP,INSR,JARID2,JUN,KCNMA1,LDLR,LITAF,LRRFIP1,LY6E,MAP4K3,MAP4K4,MBNL1,MSR1,MYO9B,NFKBIA,NLRP3,N…	101
Cancer,Hematological Disease,Organismal Injury and Abnormalities	Neoplasia of blood cells	8.03e-13		1.256	ABCA1,AMPH,ANPEP,APOBEC3A,ARHGAP26,ATF6,C1QC,CD14,CD52,CD74,CMIP,CRYBG1,DENND4A,DLGAP1,EEF1A1,FCGR3A/FCGR3B,FOXO3,HIF1A,HLA-DPB1,HLA-DQA1,HLA-DQA2,HLA-DQB1,HLA-DRA,HLA-DRB1,HMOX1,HSP90AA1,HSPA1A/HSPA1B,HSPD1,HSPH1,IFI6,IGHA1,IL10,IL1B,IL1RAP,INSR,JARID2,JUN,KCNMA1,LDLR,LRRFIP1,LY6E,MAP4K3,MAP4K4,MSR1,NFKBIA,PCNX1,PDK4,PKP2,POLR2J2/POLR2J3,PPARG,PSME1,PTEN,PTPN1,PTPN2,RANBP2,RPS23,S100A4,S100A9,SN…	70
Connective Tissue Disorders,Immunological Disease,Inflammatory Disease,Inflammatory Response,Organismal Injury and Abnormalities,Skeletal and Muscular Disorders	Polyarticular juvenile rheumatoid arthritis	8.92e-13			CD74,HIF1A,HLA-DQA1,HLA-DRA,HSPA1A/HSPA1B,IL1B,NFKBIA,S100A12,S100A8,S100A9,TNFAIP3,TNFSF13B	12
Cellular Movement	Cell movement	9.05e-13		-1.373	ABCA1,ADGRE5,ANKRD28,ANPEP,AP1S2,AREG,BAIAP2L1,CD14,CD74,CFD,CH25H,CTSB,DLGAP1,FCGR3A/FCGR3B,FOXO3,HIF1A,HLA-DQB1,HMOX1,HSP90AA1,HSPA1A/HSPA1B,HSPD1,IL10,IL1B,IL1RAP,INSR,JUN,KCNMA1,LDLR,LITAF,MAP4K3,MAP4K4,MBNL1,MSR1,MYO9B,NFKBIA,NLRP3,PDK4,PELI1,PKP2,PPARD,PPARG,PTEN,PTPN1,PTPN2,RANBP2,RETN,RNASE2,S100A12,S100A4,S100A8,S100A9,SLC1A3,SRGAP2,STAT3,TNFAIP3,TNFSF13B,VCL,WARS1,ZBTB16	59
Connective Tissue Disorders,Immunological Disease,Inflammatory Disease,Inflammatory Response,Organismal Injury and Abnormalities,Skeletal and Muscular Disorders	Juvenile rheumatoid arthritis	9.56e-13			CD74,FOXO3,HIF1A,HLA-DQA1,HLA-DRA,HLA-DRB1,HSPA1A/HSPA1B,IL1B,LY6E,NFKBIA,PPARG,S100A12,S100A8,S100A9,TNFAIP3,TNFSF13B	16
Gastrointestinal Disease,Immunological Disease,Organismal Injury and Abnormalities	Celiac disease	9.56e-13			HLA-DQA1,HLA-DQB1,IFI6,IL1B,JUN,LDLR,MYO9B,NFKBIA,PELI1,TNFAIP3,WARS1	11
Cancer,Organismal Injury and Abnormalities,Reproductive System Disease	Mammary tumor	9.58e-13		-1.814	ABCA1,ADAMTS2,AGTPBP1,AMPH,ANPEP,AREG,BAIAP2L1,C1QA,CD14,CTSB,FCGR3A/FCGR3B,FKBP5,FNDC3A,FOXO3,GAS7,HIF1A,HLA-DQA1,HLA-DRB1,HLA-DRB5,HMOX1,HSP90AA1,HSPD1,IL1B,IL1RAP,INSR,JARID2,JUN,KCNMA1,LGALS2,LRRFIP1,LY6E,MAP4K3,MBNL1,MSR1,MT-TE,MT2A,MYO9B,NFKBIA,NLRP3,NOCT,OOEP,OXSR1,PDK4,PELI1,PID1,PKP2,POLR2J2/POLR2J3,PPARG,PRKCH,PTEN,PTPN1,RANBP2,RBM47,S100A4,S100A8,S100A9,SRGAP2,STAT3,STK17B,TAOK3,TEX14,…	66
Immunological Disease,Inflammatory Disease,Organismal Injury and Abnormalities	Lupus erythematosus	1.33e-12			APOBEC3A,C1QA,C1QB,FCGR3A/FCGR3B,FOXO3,HLA-DQB1,HLA-DRA,HLA-DRB1,IFI6,IL10,IL1B,LY6E,MT2A,NLRP3,PTPN1,RNASE2,S100A8,S100A9,STAT3,STK17B,TNFAIP3,TNFSF13B,WARS1	23
Cell Death and Survival,Organismal Injury and Abnormalities	Cell death of phagocytes	1.51e-12		0.941	ANPEP,C1QA,CD14,CTSB,FOXO3,HIF1A,HMOX1,IL10,IL1B,LDLR,MSR1,NFKBIA,NLRP3,PPARG,PTEN,S100A8,STAT3,TNFAIP3	18
Connective Tissue Development and Function,Tissue Development	Growth of connective tissue	1.59e-12		0.171	ANPEP,AREG,CD74,CTSB,FTL,HIF1A,HMOX1,HSPA1A/HSPA1B,IL10,IL1B,INSR,JUN,KCNMA1,NFKBIA,PID1,PPARD,PPARG,PRKCH,PTEN,PTPN1,PTPN2,RETN,S100A4,S100A8,S100A9,STAT3,TNFSF13B,TXNIP,VCL	29
Cell Death and Survival,Organismal Injury and Abnormalities	Apoptosis of leukocytes	1.73e-12		0.6	ANPEP,C1QA,CD14,FCGR3A/FCGR3B,FOXO3,HIF1A,IL10,IL1B,INSR,JUN,LDLR,LGALS2,MSR1,NFKBIA,NLRP3,PPARG,PTEN,S100A8,SERPINB9,STAT3,STK17B,TNFAIP3,TNFSF13B,ZBTB16	24
Cancer,Organismal Injury and Abnormalities,Reproductive System Disease	Breast or ovarian cancer	1.79e-12		-1.543	ABCA1,ADAMTS2,AGTPBP1,AMPH,ANPEP,AREG,BAIAP2L1,C1QA,CD14,CD163L1,CD74,CTSB,FCGR3A/FCGR3B,FKBP5,FNDC3A,FOXO3,GAS7,HIF1A,HLA-DQA1,HLA-DQA2,HLA-DRB1,HLA-DRB5,HMOX1,HSP90AA1,HSPD1,IL10,IL1B,IL1RAP,INSR,JARID2,JUN,KCNMA1,LDLR,LGALS2,LRRFIP1,LY6E,MAP4K3,MAP4K4,MBNL1,MSR1,MT-TE,MT2A,MYO9B,NFKBIA,NLRP3,NOCT,OOEP,OXSR1,PDK4,PELI1,PID1,PKP2,POLR2J2/POLR2J3,PPARD,PPARG,PRKCH,PTEN,PTPN1,RANBP2,RBM47,RNASE2,S…	75
Cancer,Organismal Injury and Abnormalities,Reproductive System Disease	Genital tumor	1.9e-12		-0.119	ABCA1,ACOT7,ADAMTS2,ADGRE5,AGTPBP1,AMPH,ANKRD28,AP1S2,APOBEC3A,ARHGAP26,ATF6,BAIAP2L1,C1QC,CD14,CD163L1,CD52,CD74,CMIP,CRYBG1,CTSB,DENND4A,DLGAP1,FAM20A,FCGR3A/FCGR3B,FKBP5,FLVCR2,FNDC3A,FOXO3,HIF1A,HLA-DPA1,HLA-DPB1,HLA-DQA1,HLA-DQA2,HLA-DRB1,HMOX1,HSP90AA1,HSPA1A/HSPA1B,HSPD1,HSPH1,IFI6,IL10,IL1B,IL1RAP,INSR,JARID2,JUN,KCNMA1,LDLR,LITAF,LRRFIP1,LY6E,MAP4K3,MAP4K4,MBNL1,MSR1,MYO9B,NFKBIA,NLRP3,N…	101
Cell-To-Cell Signaling and Interaction,Inflammatory Response	Immune response of leukocytes	1.93e-12		-1.134	ABCA1,ANPEP,CD14,CD74,CH25H,FCGR3A/FCGR3B,HIF1A,HLA-DQB1,HMOX1,HSP90AA1,IGHA1,IL10,IL1B,IL1RAP,JUN,MSR1,PPARG,PTEN,S100A9,SERPINB9,STAT3	21
Organismal Survival	Survival of organism	2.77e-12		0.879	AREG,ATF6,CD14,CD74,CH25H,CTSB,FCGR3A/FCGR3B,FTL,HIF1A,HLA-DRA,HLA-DRB1,HMOX1,HSPA1A/HSPA1B,IL10,IL1B,INSR,LDLR,LITAF,NFKBIA,NLRP3,PPARD,PPARG,PTEN,PTPN1,PTPN2,S100A9,SERPINB9,STAT3,TNFAIP3,TNFSF13B,VCL,WARS1	32
Cancer,Organismal Injury and Abnormalities	Genitourinary carcinoma	2.82e-12		-1.783	ABCA1,ACOT7,ADAMTS2,ADGRE5,AGTPBP1,AMPH,ANKRD28,ANPEP,AP1S2,APOBEC3A,AREG,ARHGAP26,ATF6,BAIAP2L1,BLVRB,C1QA,C1QC,CD14,CD163L1,CH25H,CMIP,CRYBG1,CTSB,DENND4A,DLGAP1,EEF1A1,FAM20A,FCGR3A/FCGR3B,FKBP5,FLVCR2,FNDC3A,FOXO3,GAS7,HIF1A,HLA-DPA1,HLA-DPB1,HLA-DQA1,HLA-DQA2,HLA-DQB1,HLA-DRA,HLA-DRB1,HLA-DRB5,HSP90AA1,HSPA1A/HSPA1B,HSPD1,HSPH1,IFI6,IL10,IL1B,IL1RAP,INSR,JARID2,JUN,KCNMA1,LDLR,LITAF,LRRFIP1,…	107
Cellular Movement	Cell movement of myeloid cells	2.82e-12		-0.476	ABCA1,AREG,CD14,CD74,CFD,CTSB,HIF1A,HMOX1,IL10,IL1B,LDLR,LITAF,MSR1,MYO9B,NFKBIA,NLRP3,PDK4,PPARD,PPARG,PTEN,PTPN1,RETN,S100A12,S100A4,S100A8,S100A9,STAT3,TNFAIP3	28
Cancer,Organismal Injury and Abnormalities	Extrapancreatic malignant tumor	2.94e-12		0.311	ABCA1,ACOT7,ADAMTS2,ADGRE5,AGTPBP1,AMPH,ANKRD28,ANPEP,AP1S2,APOBEC3A,AREG,ARHGAP26,ATF6,BAIAP2L1,BLVRB,C1QA,C1QB,C1QC,CD14,CD163L1,CD52,CD74,CFD,CH25H,CMIP,CRYBG1,CTSB,DENND4A,DLGAP1,DNAJB1,EEF1A1,EEPD1,FAM20A,FCGR3A/FCGR3B,FKBP5,FLVCR2,FNDC3A,FOXO3,FTL,GAS7,HIF1A,HLA-DPA1,HLA-DPB1,HLA-DQA1,HLA-DQA2,HLA-DQB1,HLA-DRA,HLA-DRB1,HLA-DRB5,HMOX1,HSP90AA1,HSPA1A/HSPA1B,HSPD1,HSPH1,IFI6,IFITM10,IGHA1,IL1…	131
Immunological Disease,Organismal Injury and Abnormalities	Hypersensitive reaction	3.17e-12		0.333	ABCA1,CD74,EEF1A1,FCGR3A/FCGR3B,HLA-DQA1,HLA-DQB1,HLA-DRA,HLA-DRB1,HLA-DRB5,HSPA1A/HSPA1B,IL10,IL1B,JUN,LGALS2,NFKBIA,NLRP3,PDK4,PPARG,PTEN,S100A8,S100A9,TNFAIP3,VCL	23
Cellular Movement,Hematological System Development and Function,Immune Cell Trafficking	Cell movement of mononuclear leukocytes	3.41e-12		0.49	ABCA1,CD74,CH25H,HIF1A,HMOX1,HSP90AA1,HSPD1,IL10,IL1B,INSR,JUN,LDLR,MAP4K3,MYO9B,NFKBIA,NLRP3,PELI1,PPARG,PTEN,PTPN2,RETN,S100A12,S100A4,STAT3,TNFSF13B	25
Cell Death and Survival,Organismal Injury and Abnormalities	Necrosis	4.63e-12		1.491	ABCA1,AGTPBP1,ANPEP,APOBEC3A,AREG,ATF6,C1QA,CD14,CD74,CTSB,DENND4A,DNAJB1,EEF1A1,FCGR3A/FCGR3B,FKBP5,FNDC3A,FOXO3,GAS7,HIF1A,HLA-DQB1,HMOX1,HSP90AA1,HSPA1A/HSPA1B,HSPD1,HSPH1,IFI6,IL10,IL1B,INSR,JUN,KCNMA1,LDLR,LGALS2,MAP4K4,MSR1,MT2A,NFKBIA,NLRP3,PELI1,PKP2,PPARD,PPARG,PRKCH,PTEN,PTPN1,PTPN2,RANBP2,RETN,RNASE1,S100A4,S100A8,S100A9,SERPINB9,SLC1A3,SNHG5,STAT3,STK17B,TAOK3,TNFAIP3,TNFSF13B,TXNIP,U…	63
Cell Death and Survival,Organismal Injury and Abnormalities	Cell death of myeloid cells	4.91e-12		0.751	ANPEP,C1QA,CD14,CTSB,FOXO3,HIF1A,HMOX1,IL10,IL1B,LDLR,MSR1,NFKBIA,NLRP3,PPARG,PTEN,S100A8,STAT3,TNFAIP3	18
Cell Death and Survival,Organismal Injury and Abnormalities	Cell death of immune cells	5.92e-12		1.402	ANPEP,C1QA,CD14,CD74,CTSB,FCGR3A/FCGR3B,FOXO3,HIF1A,HMOX1,IL10,IL1B,INSR,JUN,LDLR,LGALS2,MSR1,NFKBIA,NLRP3,PELI1,PPARG,PTEN,S100A8,SERPINB9,STAT3,STK17B,TNFAIP3,TNFSF13B,ZBTB16	28
Cancer,Organismal Injury and Abnormalities	Growth of tumor	6.2e-12		-0.465	ANPEP,AREG,CTSB,EEF1A1,FCGR3A/FCGR3B,FOXO3,HIF1A,HLA-DQB1,HMOX1,HSP90AA1,HSPA1A/HSPA1B,HSPD1,HSPH1,IL10,IL1B,INSR,JUN,LITAF,LY6E,MSR1,NFKBIA,NLRP3,PDK4,PELI1,PPARD,PPARG,PTEN,PTPN2,S100A9,SERPINB9,SNHG5,STAT3,TAOK3,TNFAIP3,TNFSF13B,TXNIP,VAMP8	37
Neurological Disease,Organismal Injury and Abnormalities,Skeletal and Muscular Disorders	Neuromuscular disease	6.69e-12			AP1S2,AREG,CD52,CD74,CTSB,DNAJB1,EEF1A1,FCGR3A/FCGR3B,FNDC3A,FOXO3,FTL,HLA-DQA1,HLA-DQA2,HLA-DQB1,HLA-DRA,HLA-DRB1,HLA-DRB5,HMOX1,HSP90AA1,HSPA1A/HSPA1B,IL10,IL1B,JUN,KCNMA1,LDLR,LY6E,MT-TE,MT-TP,MT2A,NLRP3,PPARG,PSME1,RANBP2,SLC1A3,SLC39A8,USP36,ZBTB16	37
Cell Death and Survival	Cell survival	6.71e-12		-0.877	ABCA1,AGTPBP1,APOBEC3A,AREG,ATF6,CD74,CTSB,DENND4A,FCGR3A/FCGR3B,FKBP5,FOXO3,FTL,HIF1A,HMOX1,HSPA1A/HSPA1B,HSPD1,HSPH1,IL10,IL1B,INSR,JUN,MAP4K4,MSR1,NFKBIA,PDK4,PPARD,PPARG,PRKCH,PTEN,PTPN1,PTPN2,RANBP2,RNASE2,S100A4,S100A8,S100A9,SERPINB9,SLC1A3,STAT3,TAOK3,TNFAIP3,TNFSF13B,TXNIP,USP36,VCL,ZBTB16	46
Cell Death and Survival,Organismal Injury and Abnormalities	Apoptosis of phagocytes	7.1e-12		0.569	ANPEP,C1QA,CD14,FOXO3,HIF1A,IL10,IL1B,LDLR,MSR1,NFKBIA,NLRP3,PPARG,PTEN,S100A8,STAT3,TNFAIP3	16
Cell-To-Cell Signaling and Interaction,Cellular Movement,Hematological System Development and Function,Immune Cell Trafficking	Recruitment of leukocytes	7.33e-12		0.251	ADGRE5,CD14,CD74,FCGR3A/FCGR3B,HIF1A,HMOX1,HSPA1A/HSPA1B,IL10,IL1B,JUN,MYO9B,NFKBIA,NLRP3,PELI1,PPARG,PTEN,PTPN2,S100A4,S100A8,STAT3	20
Cell-mediated Immune Response,Cellular Function and Maintenance,Hematological System Development and Function	T cell homeostasis	7.62e-12		0.637	CD74,DNAJB1,FOXO3,HIF1A,HLA-DQA1,HLA-DQB1,HLA-DRA,HLA-DRB1,HSP90AA1,HSPD1,IL10,IL1B,JUN,LGALS2,MSR1,NFKBIA,NLRP3,PPARG,PRKCH,PTEN,PTPN2,STAT3,TNFAIP3,TNFSF13B,ZBTB16	25
Inflammatory Response,Organismal Injury and Abnormalities	Inflammation of absolute anatomical region	8.55e-12		1.029	ABCA1,AREG,C1QA,CD14,CD74,CH25H,CTSB,FCGR3A/FCGR3B,FOXO3,HIF1A,HLA-DQA1,HLA-DQB1,HLA-DRB5,HMOX1,HSPD1,IL10,IL1B,INSR,JUN,KCNMA1,LDLR,LGALS2,LITAF,NFKBIA,NLRP3,PELI1,PPARD,PPARG,PTEN,PTPN1,PTPN2,S100A4,S100A8,S100A9,SLC1A3,SLC39A8,STAT3,STK17B,TNFAIP3,TNFSF13B,VSIG4	41
Cellular Function and Maintenance	Homeostasis of blood cells	8.98e-12		0.574	CD74,DNAJB1,FOXO3,HIF1A,HLA-DQA1,HLA-DQB1,HLA-DRA,HLA-DRB1,HMOX1,HSP90AA1,HSPD1,IL10,IL1B,JUN,LGALS2,MSR1,NFKBIA,NLRP3,PPARG,PRKCH,PTEN,PTPN2,STAT3,TNFAIP3,TNFSF13B,ZBTB16	26
Cellular Movement	Cellular infiltration by myeloid cells	1.03e-11		0.812	AREG,CD14,CFD,CTSB,HIF1A,HMOX1,IL10,IL1B,LDLR,MSR1,NFKBIA,NLRP3,PDK4,PPARG,PTEN,PTPN1,RETN,S100A8,S100A9,STAT3,TNFAIP3	21
Gastrointestinal Disease,Hepatic System Disease,Metabolic Disease,Organismal Injury and Abnormalities	Hepatic steatosis	1.44e-11		-1.753	ABCA1,ATF6,CD14,FKBP5,FOXO3,HLA-DQA1,HMOX1,IL10,IL1B,INSR,JUN,LDLR,NOCT,PPARD,PPARG,PTEN,PTPN2,S100A4,STAT3,TXNIP,VSIG4	21
Cardiovascular System Development and Function,Organ Morphology,Organismal Development	Morphology of heart	1.51e-11			ABCA1,ADAMTS2,ATF6,CTSB,FOXO3,HIF1A,HLA-DQA1,HMOX1,IL10,IL1B,INSR,JARID2,JUN,LDLR,LITAF,LY6E,MBNL1,NFKBIA,NLRP3,PKP2,PPARD,PPARG,PTEN,SLC1A3,SLC39A8,STAT3,TNFAIP3,TXNIP,VCL,ZBTB16	30
Cellular Movement,Hematological System Development and Function,Immune Cell Trafficking,Inflammatory Response	Cellular infiltration by phagocytes	1.58e-11		0.642	AREG,CD14,CFD,CTSB,HIF1A,HMOX1,IL10,IL1B,LDLR,NFKBIA,NLRP3,PDK4,PPARG,PTEN,PTPN1,RETN,S100A8,S100A9,STAT3,TNFAIP3	20
Cell-To-Cell Signaling and Interaction,Hematological System Development and Function,Immune Cell Trafficking,Inflammatory Response	Activation of T lymphocytes	1.78e-11		0.807	CD74,FOXO3,HLA-DPA1,HLA-DPB1,HLA-DQB1,HLA-DRA,HLA-DRB1,HSPA1A/HSPA1B,HSPD1,HSPH1,IL10,IL1B,LDLR,NFKBIA,NLRP3,PELI1,PPARG,PTEN,SERPINB9,STAT3,VAMP8	21
Organismal Injury and Abnormalities,Tissue Morphology	Size of lesion	1.82e-11			AREG,C1QA,CD74,CTSB,FOXO3,HIF1A,HMOX1,HSPA1A/HSPA1B,HSPH1,IL10,IL1B,JUN,LDLR,LGALS2,MSR1,NFKBIA,NLRP3,PPARD,PTEN,PTPN2,STAT3,TNFAIP3	22
Cell Death and Survival	Cell viability	1.83e-11		-0.576	ABCA1,AGTPBP1,APOBEC3A,AREG,ATF6,CD74,CTSB,DENND4A,FCGR3A/FCGR3B,FKBP5,FOXO3,HIF1A,HMOX1,HSPA1A/HSPA1B,HSPD1,HSPH1,IL10,IL1B,INSR,JUN,MAP4K4,MSR1,NFKBIA,PDK4,PPARD,PPARG,PRKCH,PTEN,PTPN1,PTPN2,RANBP2,RNASE2,S100A4,S100A8,S100A9,SERPINB9,SLC1A3,STAT3,TAOK3,TNFAIP3,TNFSF13B,TXNIP,USP36,ZBTB16	44
Dermatological Diseases and Conditions,Organismal Injury and Abnormalities	Abnormality of skin morphology	1.89e-11			CD52,CD74,CFD,EEF1A1,HLA-DPA1,HLA-DPB1,HLA-DQA1,HLA-DQB1,HLA-DRA,HLA-DRB1,IFI6,IL10,IL1B,INSR,JUN,NFKBIA,PPARG,PRKCH,PTEN,S100A8,S100A9	21
Cell-To-Cell Signaling and Interaction,Hematological System Development and Function,Immune Cell Trafficking,Inflammatory Response	Activation of antigen presenting cells	1.93e-11		-0.289	C1QA,CD14,CD74,FCGR3A/FCGR3B,HLA-DQA1,HLA-DQB1,HMOX1,HSPD1,IL10,IL1B,JUN,MSR1,PDK4,PELI1,PPARG,PSME1,RNASE2,S100A9,STAT3,VAMP8	20
Tissue Morphology	Quantity of cells	2.1e-11		-0.968	ABCA1,ADGRE5,ANPEP,C1QA,CD74,CTSB,DENND4A,FOXO3,HIF1A,HLA-DQA1,HLA-DQB1,HLA-DRB1,HMOX1,HSPD1,IGHA1,IL10,IL1B,IL1RAP,INSR,JARID2,JUN,LDLR,LGALS2,LITAF,MSR1,MT2A,MYO9B,NFKBIA,NLRP3,PDK4,PELI1,PPARD,PPARG,PRKCH,PTEN,PTPN2,S100A8,S100A9,SLC1A3,SLC39A8,SNHG5,STAT3,STK17B,TNFAIP3,TNFSF13B,TXNIP,VCL,VSIG4,ZBTB16	49
Cancer,Organismal Injury and Abnormalities,Reproductive System Disease	Breast adenocarcinoma	2.17e-11			ABCA1,AMPH,CD14,FNDC3A,FOXO3,HIF1A,HLA-DQA1,HLA-DRB5,HSP90AA1,HSPD1,IL1RAP,INSR,JARID2,JUN,LY6E,MAP4K3,MBNL1,MT2A,MYO9B,NFKBIA,NOCT,OXSR1,PDK4,PPARG,PRKCH,PTEN,PTPN1,RANBP2,S100A4,SRGAP2,STAT3,TAOK3,TEX14,VRK2	34
Cancer,Organismal Injury and Abnormalities	Lymphatic system tumor	2.54e-11		-0.069	ABCA1,AMPH,ANPEP,APOBEC3A,ARHGAP26,ATF6,C1QC,CD14,CD163L1,CD52,CD74,CMIP,CRYBG1,DENND4A,DLGAP1,EEF1A1,FCGR3A/FCGR3B,FOXO3,HIF1A,HLA-DPB1,HLA-DQA1,HLA-DQA2,HLA-DRA,HLA-DRB1,HMOX1,HSP90AA1,HSPH1,IFI6,IGHA1,IL10,IL1B,INSR,JARID2,JUN,LDLR,LRRFIP1,LY6E,MAP4K4,NFKBIA,NLRP3,NOCT,PDK4,PELI1,PKP2,PPARG,PTEN,PTPN1,PTPN2,S100A4,S100A9,ST6GALNAC3,STAT3,STK17B,TEX14,TNFAIP3,TNFSF13B,VCL,WDR74,ZBTB16	59
Cardiovascular Disease,Organismal Injury and Abnormalities	Peripheral vascular disease	2.55e-11		0.555	ABCA1,ADGRE5,AMPH,ATF6,CTSB,DNAJB1,FCGR3A/FCGR3B,HIF1A,HLA-DRB1,HSPA1A/HSPA1B,HSPH1,INSR,LDLR,MAP4K4,MSR1,NPL,PPARD,PPARG,PRKCH,RNASE2,S100A12,S100A9,VSIG4	23
Cancer,Organismal Injury and Abnormalities,Reproductive System Disease	Breast carcinoma	2.81e-11		-1.522	ABCA1,AGTPBP1,AMPH,ANPEP,AREG,BAIAP2L1,C1QA,CD14,CTSB,FCGR3A/FCGR3B,FKBP5,FNDC3A,FOXO3,GAS7,HIF1A,HLA-DQA1,HLA-DRB1,HLA-DRB5,HSP90AA1,HSPD1,IL1RAP,INSR,JARID2,JUN,KCNMA1,LY6E,MAP4K3,MBNL1,MT2A,MYO9B,NFKBIA,NLRP3,NOCT,OOEP,OXSR1,PDK4,PID1,PKP2,POLR2J2/POLR2J3,PPARG,PRKCH,PTEN,PTPN1,RANBP2,RBM47,S100A4,SRGAP2,STAT3,STK17B,TAOK3,TEX14,UBC,USP36,VRK2	54
Cancer,Hematological Disease,Immunological Disease,Organismal Injury and Abnormalities	Neoplasia of leukocytes	2.82e-11		0.257	ABCA1,AMPH,ANPEP,APOBEC3A,ARHGAP26,ATF6,C1QC,CD14,CD52,CD74,CMIP,CRYBG1,DENND4A,DLGAP1,EEF1A1,FCGR3A/FCGR3B,FOXO3,HIF1A,HLA-DPB1,HLA-DQA1,HLA-DQA2,HLA-DRA,HLA-DRB1,HMOX1,HSP90AA1,HSPH1,IFI6,IGHA1,IL10,IL1B,INSR,JARID2,JUN,KCNMA1,LDLR,LRRFIP1,LY6E,MAP4K4,NFKBIA,PDK4,PKP2,PPARG,PTEN,PTPN1,PTPN2,S100A4,S100A9,ST6GALNAC3,STAT3,STK17B,TEX14,TNFAIP3,TNFSF13B,VCL,WDR74,ZBTB16	56
Cellular Movement,Hematological System Development and Function,Immune Cell Trafficking,Inflammatory Response	Cellular infiltration by macrophages	2.84e-11		-0.007	AREG,CD14,CFD,HIF1A,HMOX1,IL10,IL1B,LDLR,NLRP3,PDK4,PPARG,PTEN,PTPN1,RETN,STAT3,TNFAIP3	16
Cell-mediated Immune Response,Cellular Development,Cellular Function and Maintenance,Cellular Growth and Proliferation,Embryonic Development,Hematological System Development and Function,Hematopoiesis,Lymphoid Tissue Structure and Development,Organ Development,Organismal Development,Tissue Development	T cell development	3.12e-11		0.637	CD74,DNAJB1,FOXO3,HIF1A,HLA-DQA1,HLA-DQB1,HLA-DRA,HLA-DRB1,HSP90AA1,HSPD1,IL10,IL1B,JUN,MSR1,NFKBIA,NLRP3,PPARG,PRKCH,PTEN,PTPN2,STAT3,TNFAIP3,TNFSF13B,ZBTB16	24
Cell-To-Cell Signaling and Interaction,Inflammatory Response	Immune response of phagocytes	3.15e-11		-0.772	ABCA1,ANPEP,CD14,CD74,CH25H,FCGR3A/FCGR3B,HIF1A,HMOX1,HSP90AA1,IGHA1,IL10,IL1B,PPARG,PTEN,S100A9,SERPINB9,STAT3	17
Cellular Movement,Hematological System Development and Function,Immune Cell Trafficking	Cell movement of lymphocytes	3.52e-11		0.769	CD74,CH25H,HIF1A,HMOX1,HSP90AA1,HSPD1,IL10,IL1B,INSR,JUN,LDLR,MAP4K3,MYO9B,NFKBIA,NLRP3,PELI1,PPARG,PTEN,PTPN2,S100A4,STAT3,TNFSF13B	22
Cellular Growth and Proliferation,Connective Tissue Development and Function,Tissue Development	Proliferation of connective tissue cells	3.64e-11		0.551	AREG,CD74,CTSB,HIF1A,HMOX1,HSPA1A/HSPA1B,IL10,IL1B,INSR,JUN,KCNMA1,NFKBIA,PID1,PPARD,PPARG,PRKCH,PTEN,PTPN1,PTPN2,RETN,S100A4,S100A8,S100A9,STAT3,TXNIP,VCL	26
Free Radical Scavenging	Metabolism of reactive oxygen species	3.72e-11		0.193	ABCA1,CD14,CD52,EEF1A1,FCGR3A/FCGR3B,FOXO3,FTL,HIF1A,HMOX1,HSPD1,IFI6,IL10,IL1B,INSR,MSR1,MT-TE,NFKBIA,NLRP3,PDK4,PPARD,PPARG,PTEN,PTPN1,RETN,S100A8,STAT3,TXNIP	27
Immunological Disease,Inflammatory Disease,Organismal Injury and Abnormalities	Systemic lupus erythematosus	4.29e-11			APOBEC3A,C1QA,FCGR3A/FCGR3B,FOXO3,HLA-DQB1,HLA-DRA,HLA-DRB1,IFI6,IL10,IL1B,LY6E,MT2A,NLRP3,PTPN1,RNASE2,S100A9,STAT3,STK17B,TNFAIP3,TNFSF13B,WARS1	21
Cardiovascular Disease,Cardiovascular System Development and Function,Organ Morphology,Organismal Development,Organismal Injury and Abnormalities	Enlargement of heart	4.5e-11			ABCA1,ADAMTS2,ATF6,CTSB,FOXO3,HIF1A,HLA-DQA1,HMOX1,IL10,IL1B,INSR,JARID2,JUN,LITAF,LY6E,MBNL1,NFKBIA,PKP2,PPARD,PPARG,PTEN,SLC1A3,STAT3,TNFAIP3,VCL	25
Infectious Diseases,Organismal Injury and Abnormalities	Replication of RNA virus	5.56e-11	Decreased	-2.253	AMPH,ANPEP,CH25H,EEF1A1,HMOX1,HSP90AA1,HSPD1,IFI6,IL10,IL1B,JUN,LY6E,MAP4K4,MSR1,NFKBIA,OXSR1,PTPN1,RETN,S100A12,S100A8,S100A9,STAT3,TXNIP	23
Inflammatory Response,Organismal Injury and Abnormalities	Inflammation of body cavity	6.27e-11		0.744	ABCA1,AREG,C1QA,CD14,CD74,CH25H,CTSB,FCGR3A/FCGR3B,FOXO3,HIF1A,HLA-DQA1,HLA-DQB1,HLA-DRB5,HMOX1,IL10,IL1B,INSR,JUN,KCNMA1,LDLR,LGALS2,NFKBIA,NLRP3,PPARG,PTEN,PTPN1,PTPN2,S100A4,S100A8,S100A9,SLC39A8,STAT3,TNFAIP3,TNFSF13B,VSIG4	35
Cancer,Hematological Disease,Organismal Injury and Abnormalities	Hematologic cancer of cells	6.64e-11		-0.075	ABCA1,AMPH,ANPEP,APOBEC3A,ARHGAP26,ATF6,C1QC,CD14,CD52,CD74,CMIP,CRYBG1,DENND4A,DLGAP1,EEF1A1,FCGR3A/FCGR3B,FOXO3,HIF1A,HLA-DPB1,HLA-DQA1,HLA-DQA2,HLA-DRA,HMOX1,HSP90AA1,HSPH1,IFI6,IGHA1,IL10,IL1B,JARID2,JUN,LDLR,LRRFIP1,LY6E,MAP4K4,NFKBIA,PDK4,PKP2,PPARG,PTEN,PTPN1,PTPN2,S100A4,S100A9,ST6GALNAC3,STAT3,STK17B,TEX14,TNFAIP3,TNFSF13B,VCL,WDR74,ZBTB16	53
Cellular Movement,Hematological System Development and Function,Immune Cell Trafficking	Cellular infiltration by granulocytes	6.67e-11		1.806	AREG,CD14,CFD,CTSB,HIF1A,HMOX1,IL10,IL1B,MSR1,NFKBIA,NLRP3,PDK4,PPARG,S100A8,S100A9,STAT3,TNFAIP3	17
Cellular Development,Cellular Growth and Proliferation,Hematological System Development and Function,Hematopoiesis,Lymphoid Tissue Structure and Development,Tissue Development	Leukopoiesis	6.7e-11		0.573	ABCA1,C1QC,CD14,CD74,DNAJB1,FOXO3,HIF1A,HLA-DQA1,HLA-DQB1,HLA-DRA,HLA-DRB1,HSP90AA1,HSPD1,IGHA1,IL10,IL1B,JUN,LDLR,MSR1,NFKBIA,NLRP3,PPARG,PRKCH,PTEN,PTPN2,S100A9,STAT3,TNFAIP3,TNFSF13B,ZBTB16	30
Cancer,Organismal Injury and Abnormalities	Abdominal cancer	7.44e-11		0.642	ABCA1,ACOT7,ADAMTS2,ADGRE5,AGTPBP1,AMPH,ANKRD28,ANPEP,AP1S2,APOBEC3A,AREG,ARHGAP26,ATF6,BAIAP2L1,BLVRB,C1QA,C1QB,C1QC,CD14,CD163L1,CD52,CD74,CFD,CH25H,CMIP,CRYBG1,CTSB,DENND4A,DLGAP1,EEF1A1,EEPD1,FAM20A,FCGR3A/FCGR3B,FKBP5,FLVCR2,FNDC3A,FOXO3,FTL,GAS7,HIF1A,HLA-DPA1,HLA-DPB1,HLA-DQA1,HLA-DQA2,HLA-DQB1,HLA-DRA,HLA-DRB1,HLA-DRB5,HMOX1,HSP90AA1,HSPA1A/HSPA1B,HSPD1,HSPH1,IFI6,IFITM10,IL10,IL1B,IL1RAP…	126
Dermatological Diseases and Conditions,Immunological Disease,Inflammatory Disease,Inflammatory Response,Organismal Injury and Abnormalities	Atopic dermatitis	7.77e-11			ABCA1,CD74,EEF1A1,HLA-DQA1,HLA-DRA,HLA-DRB1,HLA-DRB5,IL10,IL1B,JUN,PDK4,PPARG,S100A8,S100A9,TNFAIP3,VCL	16
Cellular Function and Maintenance,Inflammatory Response	Phagocytosis	8.16e-11	Decreased	-2.258	ABCA1,AMPH,ANPEP,C1QA,CD14,CH25H,FCGR3A/FCGR3B,HIF1A,HMOX1,IL10,IL1B,KCNMA1,LDLR,MBNL1,MSR1,MYO9B,PELI1,PPARG,PTEN,S100A9,VAMP8	21
Gastrointestinal Disease,Organismal Injury and Abnormalities	Damage of digestive system	8.71e-11		-0.033	AREG,CD14,CTSB,HIF1A,HLA-DRA,HLA-DRB1,HMOX1,IL10,IL1B,JUN,NLRP3,PPARD,PTEN,PTPN1,STAT3,TNFAIP3,VAMP8	17
Gastrointestinal Disease,Inflammatory Disease,Inflammatory Response,Organismal Injury and Abnormalities	Experimental colitis	1e-10		-0.323	AREG,CD74,HLA-DQA1,HLA-DQB1,HLA-DRB5,IL10,IL1B,LGALS2,NLRP3,PPARG,S100A8,S100A9,STAT3,TNFAIP3	14
Dermatological Diseases and Conditions,Organismal Injury and Abnormalities	Psoriasis	1.09e-10			ADGRE5,APOBEC3A,CFD,CRYBG1,CTSB,EEF1A1,FCGR3A/FCGR3B,HIF1A,HMOX1,HSPH1,IFI6,IL10,IL1B,JUN,LDLR,PPARD,PPARG,S100A12,S100A8,S100A9,TNFAIP3,TXNIP,ZBTB16	23
Cell Death and Survival,Organismal Injury and Abnormalities	Apoptosis of antigen presenting cells	1.14e-10		0.044	C1QA,CD14,HIF1A,IL10,IL1B,LDLR,MSR1,NFKBIA,NLRP3,PPARG,PTEN,STAT3,TNFAIP3	13
Cardiovascular System Development and Function,Organismal Development	Vasculogenesis	1.21e-10		-0.579	ADAMTS2,ANPEP,AP1S2,C1QA,CTSB,FOXO3,HIF1A,HLA-DQB1,HMOX1,HSPD1,IL10,IL1B,INSR,JUN,KCNMA1,LDLR,LRRFIP1,MYO9B,NFKBIA,PPARD,PPARG,PTEN,PTPN1,RETN,S100A4,S100A8,S100A9,STAT3,TNFAIP3,WARS1	30
Cancer,Hematological Disease,Immunological Disease,Organismal Injury and Abnormalities	B-cell lymphoma	1.23e-10			AMPH,ANPEP,APOBEC3A,CD52,CD74,CMIP,DENND4A,EEF1A1,FCGR3A/FCGR3B,FOXO3,HIF1A,HLA-DQA1,HLA-DQA2,HMOX1,HSP90AA1,HSPH1,IGHA1,IL10,IL1B,JUN,LRRFIP1,MAP4K4,NFKBIA,PKP2,PTEN,PTPN1,S100A4,STAT3,STK17B,TEX14,TNFAIP3,VCL	32
Cancer,Hematological Disease,Immunological Disease,Organismal Injury and Abnormalities	Lymphocytic cancer	1.4e-10		0.257	ABCA1,AMPH,ANPEP,APOBEC3A,ARHGAP26,ATF6,C1QC,CD14,CD163L1,CD52,CD74,CMIP,CRYBG1,DENND4A,DLGAP1,EEF1A1,FCGR3A/FCGR3B,FOXO3,HIF1A,HLA-DPB1,HLA-DQA1,HLA-DQA2,HLA-DRA,HLA-DRB1,HMOX1,HSP90AA1,HSPH1,IFI6,IGHA1,IL10,IL1B,JARID2,JUN,LDLR,LRRFIP1,LY6E,MAP4K4,NFKBIA,NOCT,PDK4,PELI1,PKP2,PPARG,PTEN,PTPN1,PTPN2,S100A4,S100A9,ST6GALNAC3,STAT3,STK17B,TEX14,TNFAIP3,TNFSF13B,VCL,WDR74,ZBTB16	57
Cancer,Hematological Disease,Organismal Injury and Abnormalities	Malignant lymphocytic neoplasm	1.4e-10		0.257	ABCA1,AMPH,ANPEP,APOBEC3A,ARHGAP26,ATF6,C1QC,CD14,CD163L1,CD52,CD74,CMIP,CRYBG1,DENND4A,DLGAP1,EEF1A1,FCGR3A/FCGR3B,FOXO3,HIF1A,HLA-DPB1,HLA-DQA1,HLA-DQA2,HLA-DRA,HLA-DRB1,HMOX1,HSP90AA1,HSPH1,IFI6,IGHA1,IL10,IL1B,JARID2,JUN,LDLR,LRRFIP1,LY6E,MAP4K4,NFKBIA,NOCT,PDK4,PELI1,PKP2,PPARG,PTEN,PTPN1,PTPN2,S100A4,S100A9,ST6GALNAC3,STAT3,STK17B,TEX14,TNFAIP3,TNFSF13B,VCL,WDR74,ZBTB16	57
Cellular Development,Cellular Growth and Proliferation,Embryonic Development,Hematological System Development and Function,Hematopoiesis,Lymphoid Tissue Structure and Development,Organ Development,Organismal Development,Tissue Development	Lymphopoiesis	1.41e-10		0.796	CD14,CD74,DNAJB1,FOXO3,HIF1A,HLA-DQA1,HLA-DQB1,HLA-DRA,HLA-DRB1,HSP90AA1,HSPD1,IGHA1,IL10,IL1B,JUN,MSR1,NFKBIA,NLRP3,PPARG,PRKCH,PTEN,PTPN2,STAT3,TNFAIP3,TNFSF13B,ZBTB16	26
Gastrointestinal Disease,Inflammatory Response,Organismal Injury and Abnormalities	Inflammation of gastrointestinal tract	1.45e-10		0.995	APOBEC3A,AREG,CD74,CTSB,FOXO3,HIF1A,HLA-DQA1,HLA-DQB1,HLA-DRB5,HMOX1,IL10,IL1B,KCNMA1,LGALS2,NFKBIA,NLRP3,PPARG,PTPN2,S100A8,S100A9,STAT3,TNFAIP3,TNFSF13B,VSIG4	24
Organismal Injury and Abnormalities,Respiratory Disease	Acute respiratory disorder	1.55e-10			ANPEP,ATF6,CD14,FCGR3A/FCGR3B,FOXO3,HLA-DQA1,IL10,IL1B,KCNMA1,LY6E,NFKBIA,NLRP3,PPARG,RETN,RNASE2,S100A12,S100A9,STAT3	18
Organismal Development	Morphology of body cavity	1.75e-10			ABCA1,ADAMTS2,ADGRE5,AREG,ATF6,CD14,CMIP,CTSB,FAM20A,FOXO3,HIF1A,HLA-DQA1,HLA-DQB1,HMOX1,IL10,IL1B,INSR,JARID2,JUN,LDLR,LITAF,LY6E,MAP4K4,MBNL1,MSR1,NFKBIA,NLRP3,PKP2,PPARD,PPARG,PTEN,PTPN1,PTPN2,RETN,SLC1A3,SLC39A8,STAT3,STK17B,TNFAIP3,TNFSF13B,TXNIP,VCL,ZBTB16	43
Cancer,Organismal Injury and Abnormalities	Pelvic carcinoma	1.76e-10			ABCA1,ACOT7,ADAMTS2,ADGRE5,AGTPBP1,AMPH,ANKRD28,ANPEP,AP1S2,APOBEC3A,ARHGAP26,ATF6,BAIAP2L1,C1QC,CD14,CD163L1,CH25H,CMIP,CRYBG1,CTSB,DENND4A,DLGAP1,EEF1A1,FAM20A,FKBP5,FLVCR2,FNDC3A,FOXO3,HIF1A,HLA-DPA1,HLA-DPB1,HLA-DQA1,HLA-DQA2,HLA-DQB1,HLA-DRA,HLA-DRB1,HSP90AA1,HSPA1A/HSPA1B,HSPD1,HSPH1,IFI6,IL10,IL1B,IL1RAP,INSR,JARID2,JUN,KCNMA1,LDLR,LITAF,LRRFIP1,MAP4K3,MAP4K4,MBNL1,MSR1,MYO9B,NFKBIA,NLRP3,…	97
Cancer,Organismal Injury and Abnormalities	Tumorigenesis of tissue	1.83e-10		0.191	ABCA1,ACOT7,ADAMTS2,ADGRE5,AGTPBP1,AMPH,ANKRD28,ANPEP,AP1S2,APOBEC3A,APOO,AREG,ARHGAP26,ATF6,BAIAP2L1,BLVRB,C1QA,C1QB,C1QC,CD14,CD163L1,CD52,CD74,CFD,CH25H,CMIP,CRYBG1,CTSB,DENND4A,DLGAP1,DNAJB1,EEF1A1,EEPD1,FAM20A,FCGR3A/FCGR3B,FKBP5,FLVCR2,FNDC3A,FOXO3,FTL,GAS7,HIF1A,HLA-DPA1,HLA-DPB1,HLA-DQA1,HLA-DQA2,HLA-DQB1,HLA-DRA,HLA-DRB1,HLA-DRB5,HMOX1,HSP90AA1,HSPA1A/HSPA1B,HSPD1,HSPH1,IFI6,IFITM10,IL10…	129
Endocrine System Disorders,Metabolic Disease,Organismal Injury and Abnormalities	Insulin resistance	1.89e-10		-0.834	BAIAP2L1,C1QA,CFD,FKBP5,IL10,IL1B,INSR,LDLR,MT-TE,NFKBIA,NLRP3,PPARD,PPARG,PTEN,PTPN1,RETN,S100A8,STAT3,TPST1	19
Cancer,Hematological Disease,Immunological Disease,Organismal Injury and Abnormalities	B-cell non-Hodgkin lymphoma	1.9e-10			AMPH,ANPEP,APOBEC3A,CD52,DENND4A,EEF1A1,FCGR3A/FCGR3B,FOXO3,HIF1A,HLA-DQA1,HLA-DQA2,HMOX1,HSP90AA1,HSPH1,IGHA1,IL10,IL1B,JUN,LRRFIP1,MAP4K4,NFKBIA,PKP2,PTEN,PTPN1,S100A4,STAT3,STK17B,TEX14,TNFAIP3,VCL	30
Cell Death and Survival,Organismal Injury and Abnormalities	Cell death of connective tissue cells	2.14e-10		0.872	ATF6,CTSB,DENND4A,EEF1A1,FOXO3,HIF1A,HMOX1,HSPD1,IL10,IL1B,INSR,JUN,NFKBIA,NLRP3,PELI1,PPARG,PTEN,PTPN1,RANBP2,S100A8,STAT3,STK17B,TNFAIP3,TXNIP	24
Cardiovascular System Development and Function,Organismal Development	Angiogenesis	2.2e-10		-0.95	ADAMTS2,ANPEP,AP1S2,AREG,C1QA,CTSB,FOXO3,HIF1A,HLA-DQB1,HMOX1,HSP90AA1,HSPD1,IL10,IL1B,INSR,JUN,KCNMA1,LDLR,LRRFIP1,MYO9B,NFKBIA,PPARD,PPARG,PTEN,PTPN1,RETN,S100A12,S100A4,S100A8,S100A9,STAT3,TNFAIP3,WARS1	33
Cancer,Organismal Injury and Abnormalities	Malignant solid tumor	2.43e-10		0.128	ABCA1,ACOT7,ADAMTS2,ADGRE5,AGTPBP1,AMPH,ANKRD28,ANPEP,AP1S2,APOBEC3A,APOO,AREG,ARHGAP26,ATF6,BAIAP2L1,BLVRB,C1QA,C1QB,C1QC,CD14,CD163L1,CD52,CD74,CFD,CH25H,CMIP,CRYBG1,CTSB,DENND4A,DLGAP1,DNAJB1,EEF1A1,EEPD1,FAM20A,FCGR3A/FCGR3B,FKBP5,FLVCR2,FNDC3A,FOXO3,FTL,GAS7,HIF1A,HLA-DPA1,HLA-DPB1,HLA-DQA1,HLA-DQA2,HLA-DQB1,HLA-DRA,HLA-DRB1,HLA-DRB5,HMOX1,HSP90AA1,HSPA1A/HSPA1B,HSPD1,HSPH1,IFI6,IFITM10,IGHA…	131
Cancer,Organismal Injury and Abnormalities	Breast or pancreatic cancer	2.53e-10		-0.677	ABCA1,ADAMTS2,AGTPBP1,AMPH,ANPEP,AREG,BAIAP2L1,C1QA,CD14,CD163L1,CD74,CRYBG1,CTSB,DLGAP1,EEF1A1,FCGR3A/FCGR3B,FKBP5,FNDC3A,FOXO3,GAS7,HIF1A,HLA-DQA1,HLA-DQA2,HLA-DRA,HLA-DRB1,HLA-DRB5,HMOX1,HSP90AA1,HSPD1,IL10,IL1B,IL1RAP,INSR,JARID2,JUN,KCNMA1,LDLR,LGALS2,LRRFIP1,LY6E,MAP4K3,MAP4K4,MBNL1,MSR1,MT-TE,MT2A,MYO9B,NFKBIA,NLRP3,NOCT,OOEP,OXSR1,PDK4,PELI1,PID1,PKP2,POLR2J2/POLR2J3,PPARD,PPARG,PRKCH,PTE…	82
Cancer,Organismal Injury and Abnormalities	Abdominal adenocarcinoma	2.59e-10		0.501	ABCA1,ACOT7,ADAMTS2,ADGRE5,AGTPBP1,AMPH,ANKRD28,ANPEP,AP1S2,APOBEC3A,AREG,ARHGAP26,ATF6,BAIAP2L1,BLVRB,C1QB,C1QC,CD14,CD163L1,CD74,CFD,CH25H,CMIP,CRYBG1,CTSB,DENND4A,DLGAP1,EEF1A1,EEPD1,FAM20A,FCGR3A/FCGR3B,FKBP5,FLVCR2,FNDC3A,FOXO3,GAS7,HIF1A,HLA-DPA1,HLA-DPB1,HLA-DQA1,HLA-DQA2,HLA-DQB1,HLA-DRA,HLA-DRB1,HLA-DRB5,HMOX1,HSP90AA1,HSPA1A/HSPA1B,HSPD1,HSPH1,IFI6,IL10,IL1B,IL1RAP,INSR,JARID2,JUN,KCNMA…	119
Cardiovascular Disease,Cardiovascular System Development and Function,Organ Morphology,Organismal Development,Organismal Injury and Abnormalities	Abnormal morphology of heart	3.12e-10			ABCA1,ADAMTS2,ATF6,CTSB,FOXO3,HIF1A,HLA-DQA1,HMOX1,IL10,IL1B,INSR,JARID2,JUN,LITAF,LY6E,MBNL1,NFKBIA,PKP2,PPARD,PPARG,PTEN,SLC1A3,SLC39A8,STAT3,TNFAIP3,TXNIP,VCL	27
Cancer,Organismal Injury and Abnormalities	Cancer of cells	3.15e-10		-1.308	ABCA1,ADGRE5,AMPH,ANPEP,APOBEC3A,ARHGAP26,ATF6,C1QC,CD14,CD163L1,CD52,CD74,CFD,CMIP,CRYBG1,CTSB,DENND4A,DLGAP1,EEF1A1,FCGR3A/FCGR3B,FLVCR2,FNDC3A,FOXO3,HIF1A,HLA-DPB1,HLA-DQA1,HLA-DQA2,HLA-DQB1,HLA-DRA,HLA-DRB1,HLA-DRB5,HMOX1,HSP90AA1,HSPA1A/HSPA1B,HSPH1,IFI6,IGHA1,IL10,IL1B,IL1RAP,INSR,JARID2,JUN,KCNMA1,LDLR,LRRFIP1,LY6E,MAP4K3,MAP4K4,MBNL1,MSR1,MYO9B,NFKBIA,OXSR1,PCNX1,PDK4,PKP2,POLR2J2/POLR2J3…	82
Gastrointestinal Disease,Hepatic System Disease,Organismal Injury and Abnormalities	Liver Damage	3.41e-10		0.509	AREG,CD14,CTSB,HLA-DRA,HLA-DRB1,HMOX1,IL10,IL1B,JUN,NLRP3,PPARD,PTEN,PTPN1,STAT3,TNFAIP3	15
Cell Death and Survival,Organismal Injury and Abnormalities	Apoptosis of macrophages	3.66e-10		0	C1QA,CD14,HIF1A,IL10,IL1B,LDLR,MSR1,NFKBIA,PPARG,PTEN,STAT3	11
Cancer,Organismal Injury and Abnormalities	Neoplasia of cells	3.67e-10		-0.322	ABCA1,ADGRE5,AMPH,ANPEP,APOBEC3A,AREG,ARHGAP26,ATF6,C1QC,CD14,CD163L1,CD52,CD74,CFD,CMIP,CRYBG1,CTSB,DENND4A,DLGAP1,EEF1A1,FCGR3A/FCGR3B,FLVCR2,FNDC3A,FOXO3,HIF1A,HLA-DPB1,HLA-DQA1,HLA-DQA2,HLA-DQB1,HLA-DRA,HLA-DRB1,HLA-DRB5,HMOX1,HSP90AA1,HSPA1A/HSPA1B,HSPD1,HSPH1,IFI6,IGHA1,IL10,IL1B,IL1RAP,INSR,JARID2,JUN,KCNMA1,LDLR,LRRFIP1,LY6E,MAP4K3,MAP4K4,MBNL1,MSR1,MYO9B,NFKBIA,OXSR1,PCNX1,PDK4,PKP2,POLR…	88
Organismal Injury and Abnormalities	Visceromegaly	3.8e-10			ABCA1,ADAMTS2,ATF6,CTSB,FOXO3,HIF1A,HLA-DQA1,HMOX1,IL10,IL1B,INSR,JARID2,JUN,LITAF,LY6E,MBNL1,NFKBIA,NLRP3,PKP2,PPARD,PPARG,PTEN,PTPN2,SLC1A3,STAT3,TNFAIP3,TNFSF13B,VCL	28
Free Radical Scavenging	Synthesis of reactive oxygen species	4.18e-10		0.193	ABCA1,CD14,CD52,EEF1A1,FCGR3A/FCGR3B,FOXO3,FTL,HIF1A,HMOX1,HSPD1,IL10,IL1B,INSR,MSR1,MT-TE,NFKBIA,NLRP3,PPARD,PPARG,PTEN,PTPN1,RETN,S100A8,STAT3,TXNIP	25
Cancer,Hematological Disease,Immunological Disease,Organismal Injury and Abnormalities	Lymphoma	4.21e-10		-0.072	ABCA1,AMPH,ANPEP,APOBEC3A,CD52,CD74,CMIP,CRYBG1,DENND4A,EEF1A1,FCGR3A/FCGR3B,FOXO3,HIF1A,HLA-DPB1,HLA-DQA1,HLA-DQA2,HLA-DRA,HMOX1,HSP90AA1,HSPH1,IFI6,IGHA1,IL10,IL1B,JUN,LDLR,LRRFIP1,MAP4K4,NFKBIA,PKP2,PPARG,PTEN,PTPN1,S100A4,STAT3,STK17B,TEX14,TNFAIP3,TNFSF13B,VCL,ZBTB16	41
Cardiovascular Disease,Organismal Injury and Abnormalities	Atherosclerosis	5.08e-10		0.995	ABCA1,CD14,FOXO3,HIF1A,HMOX1,HSPD1,IL10,IL1B,INSR,JUN,LDLR,MSR1,NFKBIA,PPARG,PRKCH,RETN,S100A8,S100A9,STAT3,TNFAIP3,VSIG4	21
Cancer,Hematological Disease,Immunological Disease,Organismal Injury and Abnormalities	Mature B-cell lymphoma	5.27e-10			AMPH,CD52,EEF1A1,FCGR3A/FCGR3B,FOXO3,HIF1A,HLA-DQA1,HLA-DQA2,HMOX1,HSP90AA1,HSPH1,IGHA1,IL10,IL1B,JUN,MAP4K4,NFKBIA,PKP2,PTEN,PTPN1,STAT3,STK17B,TNFAIP3	23
Cancer,Organismal Injury and Abnormalities	Adenocarcinoma	5.34e-10		0.2	ABCA1,ACOT7,ADAMTS2,ADGRE5,AGTPBP1,AMPH,ANKRD28,ANPEP,AP1S2,APOBEC3A,AREG,ARHGAP26,ATF6,BAIAP2L1,BLVRB,C1QA,C1QB,C1QC,CD14,CD163L1,CD74,CFD,CH25H,CMIP,CRYBG1,CTSB,DENND4A,DLGAP1,EEF1A1,EEPD1,FAM20A,FCGR3A/FCGR3B,FKBP5,FLVCR2,FNDC3A,FOXO3,GAS7,HIF1A,HLA-DPA1,HLA-DPB1,HLA-DQA1,HLA-DQA2,HLA-DQB1,HLA-DRA,HLA-DRB1,HLA-DRB5,HMOX1,HSP90AA1,HSPA1A/HSPA1B,HSPD1,HSPH1,IFI6,IL10,IL1B,IL1RAP,INSR,JARID2,JUN,…	120
Cell-To-Cell Signaling and Interaction,Cellular Function and Maintenance,Inflammatory Response	Phagocytosis of cells	5.8e-10	Decreased	-2.497	ABCA1,ANPEP,C1QA,CD14,CH25H,FCGR3A/FCGR3B,HIF1A,HMOX1,IL10,IL1B,LDLR,MBNL1,MSR1,MYO9B,PELI1,PPARG,PTEN,S100A9,VAMP8	19
Cancer,Organismal Injury and Abnormalities,Reproductive System Disease	Ductal breast carcinoma	6.16e-10			ABCA1,AMPH,CD14,FNDC3A,FOXO3,HIF1A,HLA-DQA1,HLA-DRB5,HSP90AA1,IL1RAP,INSR,JARID2,LY6E,MAP4K3,MT2A,MYO9B,NFKBIA,OXSR1,PDK4,PPARG,PRKCH,PTEN,PTPN1,RANBP2,SRGAP2,STAT3,TAOK3,TEX14,VRK2	29
Cancer,Organismal Injury and Abnormalities,Reproductive System Disease	Genital carcinoma	6.66e-10			ABCA1,ACOT7,ADAMTS2,ADGRE5,AGTPBP1,AMPH,ANKRD28,AP1S2,APOBEC3A,ARHGAP26,ATF6,BAIAP2L1,C1QC,CD14,CD163L1,CMIP,CRYBG1,CTSB,DENND4A,DLGAP1,FAM20A,FCGR3A/FCGR3B,FKBP5,FLVCR2,FNDC3A,FOXO3,HIF1A,HLA-DPA1,HLA-DPB1,HLA-DQA1,HLA-DQA2,HLA-DRB1,HSP90AA1,HSPA1A/HSPA1B,HSPD1,HSPH1,IFI6,IL10,IL1B,IL1RAP,INSR,JARID2,JUN,KCNMA1,LDLR,LITAF,LRRFIP1,MAP4K3,MAP4K4,MBNL1,MSR1,MYO9B,NFKBIA,NLRP3,NOCT,OOEP,OXSR1,PCNX1,…	91
Nutritional Disease,Organismal Injury and Abnormalities	Obesity	6.82e-10		-0.481	CD14,CMIP,HIF1A,HLA-DQA1,HMOX1,HSPA1A/HSPA1B,IL10,IL1B,IL1RAP,INSR,KCNMA1,LDLR,NLRP3,NOCT,PDK4,PPARD,PPARG,PTEN,PTPN1,PTPN2,RETN,STAT3,TNFAIP3,TXNIP	24
Cancer,Hematological Disease,Immunological Disease,Organismal Injury and Abnormalities	Mature B-cell neoplasm	7.14e-10			AMPH,ANPEP,APOBEC3A,ATF6,CD52,CD74,DENND4A,EEF1A1,FCGR3A/FCGR3B,FOXO3,HIF1A,HLA-DQA1,HLA-DQA2,HLA-DRB1,HMOX1,HSP90AA1,HSPH1,IGHA1,IL10,IL1B,JARID2,JUN,LRRFIP1,LY6E,MAP4K4,NFKBIA,PKP2,PTEN,PTPN1,S100A4,S100A9,STAT3,STK17B,TEX14,TNFAIP3,VCL,WDR74,ZBTB16	38
Cancer,Cellular Development,Cellular Growth and Proliferation,Organismal Injury and Abnormalities,Tumor Morphology	Proliferation of tumor cells	8.57e-10		-0.423	AREG,CTSB,EEF1A1,FOXO3,HIF1A,HMOX1,HSPA1A/HSPA1B,IL10,IL1B,INSR,JUN,LITAF,NFKBIA,PPARD,PPARG,PTEN,PTPN2,S100A9,STAT3,TNFSF13B,TXNIP	21
Infectious Diseases,Organismal Injury and Abnormalities	Streptococcal infection	8.66e-10		0.44	C1QA,CTSB,FCGR3A/FCGR3B,IL10,IL1B,NLRP3,PTEN,RETN	8
Organismal Injury and Abnormalities,Organismal Survival	Organismal death	8.73e-10		1.295	ABCA1,AMPH,AREG,ATF6,C1QA,C1QB,C1QC,CD14,CD74,CFD,CTSB,DNAJB1,FAM20A,FOXO3,FTL,HIF1A,HMOX1,HSP90AA1,IL10,IL1B,INSR,JUN,KCNMA1,LDLR,LGALS2,LY6E,MAP4K4,MBNL1,MSR1,NFKBIA,NLRP3,OXSR1,PELI1,PKP2,PPARD,PPARG,PRKCH,PTEN,PTPN1,PTPN2,S100A4,S100A8,S100A9,SLC1A3,SLC39A8,STAT3,TNFAIP3,TNFSF13B,TXNIP,UBC,USP36,VCL,VRK2,VSIG4	54
Cancer,Organismal Injury and Abnormalities,Reproductive System Disease	Female genital tract cancer	8.81e-10			ABCA1,ADAMTS2,AGTPBP1,AMPH,ANKRD28,AP1S2,APOBEC3A,ARHGAP26,ATF6,C1QC,CD163L1,CD74,CRYBG1,CTSB,DENND4A,DLGAP1,FAM20A,FCGR3A/FCGR3B,FKBP5,FLVCR2,FNDC3A,FOXO3,HIF1A,HLA-DPA1,HLA-DPB1,HLA-DQA1,HLA-DQA2,HMOX1,HSP90AA1,HSPA1A/HSPA1B,HSPD1,HSPH1,IFI6,IL10,IL1B,IL1RAP,INSR,JARID2,JUN,KCNMA1,LDLR,MAP4K3,MAP4K4,MBNL1,MSR1,MYO9B,NLRP3,NOCT,OOEP,PCNX1,PDK4,PID1,PKP2,POLR2J2/POLR2J3,PPARD,PPARG,PSME1,PTEN,PTP…	82
Organismal Injury and Abnormalities,Respiratory Disease	Lung injury	8.94e-10		0.624	ATF6,CD14,FCGR3A/FCGR3B,FOXO3,HIF1A,HLA-DQA1,HMOX1,IL10,IL1B,LY6E,NLRP3,PPARG,RETN,S100A8,STAT3	15
Cancer,Organismal Injury and Abnormalities	Invasive tumor	9.23e-10		-1.454	ABCA1,ADGRE5,ANPEP,CRYBG1,CTSB,EEF1A1,FCGR3A/FCGR3B,FNDC3A,FOXO3,FTL,GAS7,HIF1A,HLA-DQA1,HLA-DRB1,HMOX1,HSP90AA1,HSPA1A/HSPA1B,IL1B,INSR,JARID2,JUN,LGALS2,LY6E,MAP4K3,NFKBIA,NOCT,OXSR1,PDK4,PPARD,PPARG,PTEN,PTPN1,RNASE1,S100A4,SNHG5,STAT3,TNFAIP3,TXNIP	38
Cardiovascular System Development and Function,Organismal Development	Growth of blood vessel	9.65e-10		0.304	CTSB,HIF1A,HMOX1,HSPD1,IL10,IL1B,INSR,JUN,LRRFIP1,PPARD,PPARG,PTEN,PTPN1,RETN,STAT3	15
Cellular Movement,Hematological System Development and Function,Immune Cell Trafficking	Cell movement of granulocytes	1e-09		0.759	AREG,CD14,CD74,CFD,CTSB,HIF1A,HMOX1,IL10,IL1B,MSR1,NFKBIA,NLRP3,PDK4,PPARG,PTEN,S100A12,S100A8,S100A9,STAT3,TNFAIP3	20
Cancer,Organismal Injury and Abnormalities	Genitourinary adenocarcinoma	1.05e-09		-1.125	ABCA1,ACOT7,ADAMTS2,ADGRE5,AGTPBP1,AMPH,ANKRD28,ANPEP,AP1S2,APOBEC3A,ARHGAP26,ATF6,BAIAP2L1,BLVRB,C1QC,CD14,CD163L1,CMIP,CRYBG1,DENND4A,DLGAP1,FAM20A,FKBP5,FLVCR2,FNDC3A,FOXO3,HIF1A,HLA-DPA1,HLA-DPB1,HLA-DQA1,HLA-DQA2,HLA-DQB1,HLA-DRB1,HLA-DRB5,HSP90AA1,HSPA1A/HSPA1B,HSPD1,HSPH1,IFI6,IL10,IL1B,IL1RAP,INSR,JARID2,JUN,KCNMA1,LDLR,LITAF,LRRFIP1,LY6E,MAP4K3,MAP4K4,MBNL1,MSR1,MT2A,MYO9B,NFKBIA,NLRP3,N…	94
Cancer,Organismal Injury and Abnormalities,Reproductive System Disease	Female genital neoplasm	1.15e-09			ABCA1,ADAMTS2,ADGRE5,AGTPBP1,AMPH,ANKRD28,AP1S2,APOBEC3A,ARHGAP26,ATF6,C1QC,CD163L1,CD74,CRYBG1,CTSB,DENND4A,DLGAP1,FAM20A,FCGR3A/FCGR3B,FKBP5,FLVCR2,FNDC3A,FOXO3,HIF1A,HLA-DPA1,HLA-DPB1,HLA-DQA1,HLA-DQA2,HMOX1,HSP90AA1,HSPA1A/HSPA1B,HSPD1,HSPH1,IFI6,IL10,IL1B,IL1RAP,INSR,JARID2,JUN,KCNMA1,LDLR,MAP4K3,MAP4K4,MBNL1,MSR1,MYO9B,NLRP3,NOCT,OOEP,PCNX1,PDK4,PID1,PKP2,POLR2J2/POLR2J3,PPARD,PPARG,PSME1,P…	83
Hematological System Development and Function,Inflammatory Response,Tissue Morphology	Quantity of phagocytes	1.16e-09		-0.962	ABCA1,C1QA,CTSB,HMOX1,IL10,IL1B,INSR,JARID2,LDLR,LGALS2,LITAF,NFKBIA,NLRP3,PPARG,PTEN,PTPN2,S100A8,S100A9,SLC39A8,STAT3,TNFAIP3	21
Immunological Disease,Organismal Injury and Abnormalities	Immediate hypersensitivity	1.17e-09			ABCA1,CD74,EEF1A1,HLA-DQA1,HLA-DRA,HLA-DRB1,HLA-DRB5,IL10,IL1B,JUN,PDK4,PPARG,PTEN,S100A8,S100A9,TNFAIP3,VCL	17
Cancer,Organismal Injury and Abnormalities	Intraabdominal organ tumor	1.17e-09		0.416	ABCA1,ACOT7,ADAMTS2,ADGRE5,AGTPBP1,AMPH,ANKRD28,ANPEP,AP1S2,APOBEC3A,AREG,ARHGAP26,ATF6,BAIAP2L1,BLVRB,C1QA,C1QB,C1QC,CD163L1,CD52,CD74,CFD,CH25H,CMIP,CRYBG1,CTSB,DENND4A,DLGAP1,EEF1A1,EEPD1,FAM20A,FCGR3A/FCGR3B,FKBP5,FLVCR2,FNDC3A,FOXO3,FTL,GAS7,HIF1A,HLA-DPA1,HLA-DPB1,HLA-DQA1,HLA-DQA2,HLA-DQB1,HLA-DRA,HLA-DRB1,HLA-DRB5,HMOX1,HSP90AA1,HSPA1A/HSPA1B,HSPD1,HSPH1,IFI6,IFITM10,IL10,IL1B,IL1RAP,INSR…	124
Cancer,Organismal Injury and Abnormalities	Abdominal carcinoma	1.17e-09		0.638	ABCA1,ACOT7,ADAMTS2,ADGRE5,AGTPBP1,AMPH,ANKRD28,ANPEP,AP1S2,APOBEC3A,AREG,ARHGAP26,ATF6,BAIAP2L1,BLVRB,C1QB,C1QC,CD14,CD163L1,CD74,CFD,CH25H,CMIP,CRYBG1,CTSB,DENND4A,DLGAP1,EEF1A1,EEPD1,FAM20A,FCGR3A/FCGR3B,FKBP5,FLVCR2,FNDC3A,FOXO3,FTL,GAS7,HIF1A,HLA-DPA1,HLA-DPB1,HLA-DQA1,HLA-DQA2,HLA-DQB1,HLA-DRA,HLA-DRB1,HLA-DRB5,HMOX1,HSP90AA1,HSPA1A/HSPA1B,HSPD1,HSPH1,IFI6,IFITM10,IL10,IL1B,IL1RAP,INSR,JARI…	122
Protein Synthesis	Metabolism of protein	1.19e-09		-0.151	ABCA1,ATF6,CD74,CTSB,DLGAP1,EEF1A1,FOXO3,HSP90AA1,HSPA1A/HSPA1B,HSPD1,IL1B,INSR,JUN,LDLR,MAP4K4,MT-TE,MT-TP,PPARD,PPARG,PTEN,PTPN2,RPL30,RPS23,S100A4,S100A9,ST6GALNAC3,STAT3,TNFAIP3,UBC,USP36,WARS1	31
Cancer,Organismal Injury and Abnormalities	Extracranial solid tumor	1.29e-09		-0.51	ABCA1,ACOT7,ADAMTS2,ADGRE5,AGTPBP1,AMPH,ANKRD28,ANPEP,AP1S2,APOBEC3A,APOO,AREG,ARHGAP26,ATF6,BAIAP2L1,BLVRB,C1QA,C1QB,C1QC,CD14,CD163L1,CD52,CD74,CFD,CH25H,CMIP,CRYBG1,CTSB,DENND4A,DLGAP1,DNAJB1,EEF1A1,EEPD1,FAM20A,FCGR3A/FCGR3B,FKBP5,FLVCR2,FNDC3A,FOXO3,FTL,GAS7,HIF1A,HLA-DPA1,HLA-DPB1,HLA-DQA1,HLA-DQA2,HLA-DQB1,HLA-DRA,HLA-DRB1,HLA-DRB5,HMOX1,HSP90AA1,HSPA1A/HSPA1B,HSPD1,HSPH1,IFI6,IFITM10,IL10…	130
Cardiovascular Disease,Cardiovascular System Development and Function,Organismal Injury and Abnormalities	Abnormal morphology of cardiovascular system	1.31e-09			ABCA1,ADAMTS2,ATF6,CTSB,FOXO3,HIF1A,HLA-DQA1,HMOX1,IL10,IL1B,INSR,JARID2,JUN,LDLR,LITAF,LY6E,MBNL1,NFKBIA,PKP2,PPARD,PPARG,PTEN,SLC1A3,SLC39A8,STAT3,TNFAIP3,TXNIP,VCL	28
Cardiovascular Disease,Organismal Injury and Abnormalities	Occlusion of artery	1.32e-09		0.995	ABCA1,CD14,FOXO3,HIF1A,HMOX1,HSPD1,IL10,IL1B,INSR,JUN,LDLR,MSR1,NFKBIA,PPARD,PPARG,PRKCH,RETN,S100A8,S100A9,STAT3,TNFAIP3,VSIG4	22
Cellular Function and Maintenance	Function of leukocytes	1.38e-09		1.489	ANPEP,CD14,CD74,HLA-DQB1,HSP90AA1,IL10,IL1B,MSR1,MYO9B,NFKBIA,NLRP3,PPARG,PTEN,S100A4,SERPINB9,STAT3,TNFAIP3,TNFSF13B,TXNIP,VSIG4	20
Cellular Development,Cellular Growth and Proliferation,Hematological System Development and Function,Lymphoid Tissue Structure and Development	Expansion of lymphocytes	1.38e-09		0.284	FOXO3,HIF1A,HSPD1,IL10,IL1B,PPARG,PTEN,PTPN2,SERPINB9,STAT3,TNFAIP3,TNFSF13B,ZBTB16	13
Cellular Function and Maintenance	Function of blood cells	1.49e-09		1.489	ABCA1,ANPEP,CD14,CD74,HLA-DQB1,HSP90AA1,IL10,IL1B,MSR1,MYO9B,NFKBIA,NLRP3,PPARG,PTEN,S100A4,SERPINB9,STAT3,TNFAIP3,TNFSF13B,TXNIP,VSIG4	21
Cellular Function and Maintenance	Function of antigen presenting cells	1.55e-09			ANPEP,CD14,CD74,HSP90AA1,IL10,IL1B,MSR1,MYO9B,NFKBIA,NLRP3,PPARG,STAT3,TNFSF13B,VSIG4	14
Cancer,Hematological Disease,Organismal Injury and Abnormalities	Mature lymphocytic neoplasm	1.68e-09			ABCA1,AMPH,ANPEP,APOBEC3A,ATF6,CD52,CD74,CRYBG1,DENND4A,EEF1A1,FCGR3A/FCGR3B,FOXO3,HIF1A,HLA-DPB1,HLA-DQA1,HLA-DQA2,HLA-DRA,HLA-DRB1,HMOX1,HSP90AA1,HSPH1,IFI6,IGHA1,IL10,IL1B,JARID2,JUN,LRRFIP1,LY6E,MAP4K4,NFKBIA,PKP2,PTEN,PTPN1,S100A4,S100A9,STAT3,STK17B,TEX14,TNFAIP3,VCL,WDR74,ZBTB16	43
Cellular Development,Cellular Growth and Proliferation,Connective Tissue Development and Function,Tissue Development	Cell proliferation of fibroblasts	1.79e-09		0.523	AREG,CD74,CTSB,HIF1A,HMOX1,IL10,IL1B,JUN,KCNMA1,NFKBIA,PPARD,PPARG,PTEN,PTPN2,S100A9,STAT3,TXNIP,VCL	18
Cancer,Organismal Injury and Abnormalities	Advanced malignant tumor	1.79e-09		-1.309	ABCA1,ADGRE5,ANPEP,CD52,CD74,CRYBG1,CTSB,EEF1A1,FCGR3A/FCGR3B,FOXO3,FTL,GAS7,HIF1A,HLA-DRB1,HMOX1,HSP90AA1,HSPA1A/HSPA1B,IL1B,INSR,JARID2,JUN,KCNMA1,LGALS2,MAP4K3,NFKBIA,OXSR1,PPARD,PTEN,RNASE1,S100A4,SNHG5,STAT3,TNFAIP3,TXNIP	34
Cardiovascular Disease,Organismal Injury and Abnormalities	Infarction	1.86e-09		1.741	C1QA,CD14,CD74,FCGR3A/FCGR3B,FOXO3,HIF1A,HMOX1,HSPH1,IL10,IL1B,INSR,LDLR,LGALS2,NFKBIA,NLRP3,PPARD,PPARG,PRKCH,TNFAIP3	19
Cell Death and Survival,Organismal Injury and Abnormalities	Apoptosis of myeloid cells	1.9e-09		0.552	ANPEP,C1QA,CD14,FOXO3,HIF1A,IL10,IL1B,LDLR,MSR1,NFKBIA,PPARG,PTEN,S100A8,STAT3	14
Cell Death and Survival,Organismal Injury and Abnormalities	Apoptosis of carcinoma cell lines	1.94e-09		0.36	AREG,ATF6,CTSB,FOXO3,HIF1A,HMOX1,JUN,NFKBIA,PPARD,PPARG,PTEN,PTPN1,PTPN2,S100A4,SNHG5,STAT3,TNFAIP3,ZBTB16	18
Cellular Development,Cellular Growth and Proliferation,Hematological System Development and Function,Lymphoid Tissue Structure and Development	Expansion of T lymphocytes	1.99e-09		0.696	FOXO3,HIF1A,HSPD1,IL10,IL1B,PPARG,PTEN,PTPN2,SERPINB9,STAT3,TNFSF13B,ZBTB16	12
Cellular Development,Cellular Growth and Proliferation,Hematological System Development and Function,Humoral Immune Response,Lymphoid Tissue Structure and Development	Proliferation of B lymphocytes	2.01e-09		-0.051	CD14,CD74,FCGR3A/FCGR3B,FTL,HIF1A,HSPD1,IL10,IL1B,NFKBIA,PELI1,PPARG,PTEN,PTPN2,TNFAIP3,TNFSF13B,ZBTB16	16
Cancer,Hematological Disease,Immunological Disease,Organismal Injury and Abnormalities	Low-grade lymphoma	2.04e-09			AMPH,ANPEP,APOBEC3A,CD52,DENND4A,FOXO3,HIF1A,HMOX1,HSP90AA1,IGHA1,IL10,JUN,LRRFIP1,MAP4K4,PKP2,PTEN,PTPN1,S100A4,STAT3,STK17B,TEX14,TNFAIP3,VCL	23
Lipid Metabolism,Molecular Transport,Small Molecule Biochemistry	Efflux of lipid	2.1e-09		-0.7	ABCA1,CD14,EEPD1,IL10,IL1B,LDLR,MSR1,NFKBIA,PPARG,S100A12,S100A8,S100A9	12
Cellular Function and Maintenance	Engulfment of cells	2.18e-09	Decreased	-2.947	ABCA1,AMPH,ANPEP,C1QA,CD14,CH25H,FCGR3A/FCGR3B,HIF1A,HMOX1,HSP90AA1,IL10,IL1B,LDLR,MBNL1,MSR1,MYO9B,PELI1,PPARG,PTEN,PTPN1,S100A9,VAMP8	22
Endocrine System Development and Function	Glucose tolerance	2.36e-09		1.015	ABCA1,BAIAP2L1,FOXO3,HIF1A,INSR,LDLR,NLRP3,NOCT,PDK4,PPARD,PPARG,PTEN,PTPN1,RETN,STAT3,TXNIP	16
Organismal Development	Growth of vessel	2.36e-09		0.304	CTSB,HIF1A,HMOX1,HSPD1,IL10,IL1B,INSR,JUN,LRRFIP1,PPARD,PPARG,PTEN,PTPN1,RETN,S100A9,STAT3	16
Hematological System Development and Function,Inflammatory Response,Tissue Morphology	Quantity of macrophages	2.43e-09		-0.331	ABCA1,HMOX1,IL10,IL1B,INSR,LDLR,LITAF,NFKBIA,NLRP3,PPARG,PTEN,PTPN2,SLC39A8,STAT3,TNFAIP3	15
Cancer,Cellular Development,Cellular Growth and Proliferation,Organismal Injury and Abnormalities,Tumor Morphology	Proliferation of cancer cells	2.48e-09		0.443	AREG,CTSB,EEF1A1,FOXO3,HIF1A,IL10,IL1B,INSR,JUN,LITAF,PPARD,PPARG,PTEN,PTPN2,S100A9,STAT3,TNFSF13B,TXNIP	18
Hematological System Development and Function,Tissue Morphology	Quantity of myeloid cells	2.53e-09		-0.706	ABCA1,ADGRE5,C1QA,CTSB,FOXO3,HMOX1,IL10,IL1B,INSR,JARID2,LDLR,LGALS2,LITAF,NFKBIA,NLRP3,PPARG,PTEN,PTPN2,S100A8,S100A9,SLC39A8,STAT3,TNFAIP3	23
Cancer,Hematological Disease,Immunological Disease,Organismal Injury and Abnormalities	Non-Hodgkin lymphoma	2.64e-09			ABCA1,AMPH,ANPEP,APOBEC3A,CD52,CRYBG1,DENND4A,EEF1A1,FCGR3A/FCGR3B,FOXO3,HIF1A,HLA-DPB1,HLA-DQA1,HLA-DQA2,HLA-DRA,HMOX1,HSP90AA1,HSPH1,IFI6,IGHA1,IL10,IL1B,JUN,LRRFIP1,MAP4K4,NFKBIA,PKP2,PTEN,PTPN1,S100A4,STAT3,STK17B,TEX14,TNFAIP3,VCL,ZBTB16	36
Neurological Disease,Organismal Injury and Abnormalities,Skeletal and Muscular Disorders	Progressive neuromuscular disease	2.8e-09			AP1S2,AREG,CD52,CD74,CTSB,EEF1A1,FCGR3A/FCGR3B,FTL,HLA-DQA1,HLA-DQA2,HLA-DQB1,HLA-DRA,HLA-DRB1,IL10,IL1B,KCNMA1,LY6E,MT-TP,NLRP3,USP36	20
Endocrine System Disorders,Gastrointestinal Disease,Immunological Disease,Metabolic Disease,Organismal Injury and Abnormalities	Insulin-dependent diabetes mellitus	2.85e-09			ABCA1,CD74,CTSB,HLA-DPA1,HLA-DPB1,HLA-DQA1,HLA-DQA2,HLA-DQB1,HLA-DRA,HLA-DRB5,HSPA1A/HSPA1B,IL1B,INSR,PPARG,PTPN2,RETN,S100A4,SNHG32,TNFSF13B	19
Cancer,Organismal Injury and Abnormalities	Breast or gastric cancer	2.91e-09		-0.796	ABCA1,ADAMTS2,AGTPBP1,AMPH,ANKRD28,ANPEP,AREG,ARHGAP26,BAIAP2L1,C1QA,C1QC,CD14,CD163L1,CD74,CMIP,CRYBG1,CTSB,DLGAP1,EEF1A1,FCGR3A/FCGR3B,FKBP5,FNDC3A,FOXO3,GAS7,HIF1A,HLA-DQA1,HLA-DQA2,HLA-DRB1,HLA-DRB5,HMOX1,HSP90AA1,HSPD1,IL10,IL1B,IL1RAP,INSR,JARID2,JUN,KCNMA1,LDLR,LGALS2,LRRFIP1,LY6E,MAP4K3,MAP4K4,MBNL1,MSR1,MT-TE,MT2A,MYO9B,NFKBIA,NLRP3,NOCT,OOEP,OXSR1,PCNX1,PDK4,PELI1,PID1,PKP2,POLR2J2/POLR…	87
Cancer,Organismal Injury and Abnormalities,Respiratory Disease	Advanced lung cancer	3e-09		-1.029	ANPEP,CTSB,EEF1A1,FCGR3A/FCGR3B,FTL,HIF1A,HSP90AA1,HSPA1A/HSPA1B,IL1B,INSR,KCNMA1,PTEN,RNASE1,SNHG5,STAT3	15
Cancer,Organismal Injury and Abnormalities,Reproductive System Disease	Tumorigenesis of reproductive tract	3.01e-09			ABCA1,ADAMTS2,ADGRE5,AGTPBP1,AMPH,ANKRD28,AP1S2,APOBEC3A,ARHGAP26,ATF6,C1QC,CD163L1,CD74,CRYBG1,CTSB,DENND4A,DLGAP1,FAM20A,FKBP5,FLVCR2,FNDC3A,FOXO3,HIF1A,HLA-DPA1,HLA-DPB1,HLA-DQA1,HLA-DQA2,HMOX1,HSP90AA1,HSPA1A/HSPA1B,HSPD1,HSPH1,IFI6,IL10,IL1B,IL1RAP,INSR,JARID2,JUN,KCNMA1,LDLR,MAP4K3,MAP4K4,MBNL1,MSR1,MYO9B,NLRP3,NOCT,OOEP,PCNX1,PDK4,PID1,PKP2,POLR2J2/POLR2J3,PPARD,PPARG,PSME1,PTEN,PTPN1,RANB…	82
Gastrointestinal Disease,Inflammatory Disease,Inflammatory Response,Organismal Injury and Abnormalities	Dextran sodium sulfate-induced colitis	3.02e-09			AREG,CD74,HLA-DQA1,HLA-DQB1,HLA-DRB5,IL10,IL1B,LGALS2,NLRP3,S100A8,S100A9,STAT3	12
Cancer,Organismal Injury and Abnormalities	Non-melanoma solid tumor	3.14e-09		0.188	ABCA1,ACOT7,ADAMTS2,ADGRE5,AGTPBP1,AMPH,ANKRD28,ANPEP,AP1S2,APOBEC3A,APOO,AREG,ARHGAP26,ATF6,BAIAP2L1,BLVRB,C1QA,C1QB,C1QC,CD14,CD163L1,CD52,CD74,CFD,CH25H,CMIP,CRYBG1,CTSB,DENND4A,DLGAP1,DNAJB1,EEF1A1,EEPD1,FAM20A,FCGR3A/FCGR3B,FKBP5,FLVCR2,FNDC3A,FOXO3,FTL,GAS7,HIF1A,HLA-DPA1,HLA-DPB1,HLA-DQA1,HLA-DQA2,HLA-DQB1,HLA-DRA,HLA-DRB1,HLA-DRB5,HMOX1,HSP90AA1,HSPA1A/HSPA1B,HSPD1,HSPH1,IFI6,IFITM10,IGHA…	128
Carbohydrate Metabolism,Molecular Transport,Small Molecule Biochemistry	Concentration of D-glucose	3.23e-09		-1.285	ATF6,C1QA,FOXO3,GAS7,HIF1A,IL1B,INSR,LDLR,NOCT,PDK4,PPARD,PPARG,PTEN,PTPN1,RETN,STAT3,TXNIP,ZBTB16	18
Organismal Injury and Abnormalities	Fibrosis	3.44e-09	Decreased	-2.164	ATF6,CD74,CTSB,HIF1A,HLA-DPB1,HLA-DQA1,HLA-DQB1,HLA-DRA,HMOX1,IL10,IL1B,JARID2,JUN,LDLR,LY6E,MBNL1,MSR1,NFKBIA,NLRP3,PPARD,PPARG,PTEN,PTPN2,RETN,STAT3,TNFAIP3,ZBTB16	27
Hematological System Development and Function,Tissue Development	Accumulation of blood cells	3.56e-09		-0.822	ADGRE5,FCGR3A/FCGR3B,FOXO3,HIF1A,HMOX1,IL10,IL1B,LDLR,NLRP3,PPARD,PTEN,PTPN1,S100A8,S100A9,STAT3,ZBTB16	16
Infectious Diseases,Inflammatory Disease,Organismal Injury and Abnormalities,Respiratory Disease	Severe acute respiratory syndrome	3.69e-09			ANPEP,CD14,FCGR3A/FCGR3B,FOXO3,HLA-DQA1,IL10,IL1B,NFKBIA,PPARG,RNASE2,S100A12,S100A9	12
Connective Tissue Disorders,Inflammatory Disease,Inflammatory Response,Organismal Injury and Abnormalities,Skeletal and Muscular Disorders	Experimentally-induced arthritis	3.69e-09		-0.151	ADGRE5,CH25H,FCGR3A/FCGR3B,FOXO3,HMOX1,IL10,IL1B,MSR1,NFKBIA,PTEN,STAT3,TNFSF13B	12
Lipid Metabolism,Molecular Transport,Small Molecule Biochemistry	Cholesterol transport	3.88e-09		0.133	ABCA1,EEPD1,IL10,IL1B,LDLR,MSR1,NFKBIA,PPARD,PPARG,S100A12,S100A8,S100A9	12
Cellular Movement,Hematological System Development and Function,Immune Cell Trafficking	Cellular infiltration by mononuclear leukocytes	4.01e-09		0.41	HIF1A,HMOX1,IL10,IL1B,LDLR,MAP4K3,NFKBIA,NLRP3,PPARG,PTEN,RETN,S100A4,STAT3,TNFSF13B	14
Cellular Movement,Hematological System Development and Function,Immune Cell Trafficking	Migration of mononuclear leukocytes	4.11e-09		0.793	ABCA1,CD74,HSP90AA1,HSPD1,IL10,IL1B,INSR,JUN,LDLR,MAP4K3,MYO9B,NLRP3,PELI1,PPARG,PTEN,PTPN2,S100A4,STAT3,TNFSF13B	19
Cancer,Organismal Injury and Abnormalities	Melanoma	4.26e-09		0.083	ABCA1,ADAMTS2,ADGRE5,AMPH,ANKRD28,ANPEP,APOBEC3A,APOO,AREG,ARHGAP26,ATF6,BAIAP2L1,BLVRB,C1QA,C1QC,CD14,CD163L1,CD52,CD74,CH25H,CMIP,CRYBG1,DENND4A,DLGAP1,DNAJB1,EEF1A1,EEPD1,FAM20A,FCGR3A/FCGR3B,FKBP5,FLVCR2,FNDC3A,FOXO3,FTL,HIF1A,HLA-DPB1,HLA-DQA1,HLA-DQA2,HLA-DQB1,HLA-DRA,HLA-DRB1,HLA-DRB5,HMOX1,HSP90AA1,HSPA1A/HSPA1B,HSPD1,HSPH1,IL10,IL1B,IL1RAP,INSR,JARID2,JUN,KCNMA1,LDLR,LRRFIP1,LY6E,MAP4K3,…	103
Lipid Metabolism,Molecular Transport,Small Molecule Biochemistry	Concentration of triacylglycerol	4.3e-09		1.115	ABCA1,C1QA,FKBP5,FOXO3,GAS7,IL10,IL1B,INSR,JUN,LDLR,PDK4,PPARD,PPARG,PTEN,PTPN1,RETN,TXNIP,ZBTB16	18
Cancer,Hematological Disease,Immunological Disease,Organismal Injury and Abnormalities	Mature B cell malignant tumor	4.35e-09			AMPH,ANPEP,APOBEC3A,CD52,DENND4A,EEF1A1,FCGR3A/FCGR3B,FOXO3,HIF1A,HLA-DQA1,HLA-DQA2,HLA-DRB1,HMOX1,HSP90AA1,HSPH1,IGHA1,IL10,IL1B,JUN,LRRFIP1,LY6E,MAP4K4,NFKBIA,PKP2,PTEN,PTPN1,S100A4,STAT3,STK17B,TEX14,TNFAIP3,VCL	32
Inflammatory Response,Organismal Injury and Abnormalities,Respiratory Disease	Inflammation of respiratory system component	4.6e-09		1.816	CD14,CH25H,FCGR3A/FCGR3B,FOXO3,HIF1A,HLA-DPB1,HLA-DQA1,HMOX1,IL10,IL1B,INSR,KCNMA1,LDLR,LY6E,NFKBIA,NLRP3,PPARG,PTEN,RETN,S100A4,SLC39A8,STAT3	22
Cancer,Organismal Injury and Abnormalities,Reproductive System Disease	Breast or ovarian carcinoma	4.63e-09		-1.543	ABCA1,ADAMTS2,AGTPBP1,AMPH,ANPEP,AREG,BAIAP2L1,C1QA,CD14,CD163L1,CTSB,FCGR3A/FCGR3B,FKBP5,FNDC3A,FOXO3,GAS7,HIF1A,HLA-DQA1,HLA-DQA2,HLA-DRB1,HLA-DRB5,HSP90AA1,HSPD1,IL1RAP,INSR,JARID2,JUN,KCNMA1,LDLR,LY6E,MAP4K3,MAP4K4,MBNL1,MT2A,MYO9B,NFKBIA,NLRP3,NOCT,OOEP,OXSR1,PDK4,PID1,PKP2,POLR2J2/POLR2J3,PPARD,PPARG,PRKCH,PTEN,PTPN1,RANBP2,RBM47,S100A4,SRGAP2,STAT3,STK17B,TAOK3,TEX14,TXNIP,UBC,USP36,VRK2	61
Cellular Development,Cellular Growth and Proliferation	Expansion of blood cells	5.22e-09		0.063	FOXO3,HIF1A,HMOX1,HSPD1,IL10,IL1B,PPARG,PTEN,PTPN2,SERPINB9,STAT3,TNFAIP3,TNFSF13B,ZBTB16	14
Digestive System Development and Function,Hepatic System Development and Function,Organ Development	Response of liver	5.42e-09		-1.771	CD14,FCGR3A/FCGR3B,HIF1A,HLA-DQA1,HMOX1,IL10,IL1B,INSR,JUN,LDLR,NLRP3,PPARG,PTEN,PTPN2,S100A4,STAT3,TNFAIP3,ZBTB16	18
Cell Morphology,Cellular Function and Maintenance	Transmembrane potential	5.63e-09		-1.677	DNAJB1,FOXO3,HIF1A,HMOX1,HSPD1,IFI6,IL1B,KCNMA1,LGALS2,MT-TE,NFKBIA,PID1,PPARD,PPARG,SLC39A8,ZBTB16	16
Organismal Development	Abnormal morphology of body cavity	5.69e-09			ABCA1,ADAMTS2,AREG,ATF6,CMIP,CTSB,FAM20A,FOXO3,HIF1A,HLA-DQA1,HLA-DQB1,HMOX1,IL10,IL1B,INSR,JARID2,JUN,LDLR,LITAF,LY6E,MBNL1,MSR1,NFKBIA,NLRP3,PKP2,PPARD,PPARG,PTEN,PTPN1,PTPN2,SLC1A3,SLC39A8,STAT3,TNFAIP3,TNFSF13B,TXNIP,VCL	37
Cancer,Gastrointestinal Disease,Organismal Injury and Abnormalities	Digestive system cancer	5.87e-09		1.094	ABCA1,ACOT7,ADAMTS2,ADGRE5,AGTPBP1,AMPH,ANKRD28,ANPEP,AP1S2,APOBEC3A,AREG,ARHGAP26,ATF6,BAIAP2L1,BLVRB,C1QA,C1QB,C1QC,CD14,CD163L1,CD74,CFD,CH25H,CMIP,CRYBG1,CTSB,DENND4A,DLGAP1,EEF1A1,EEPD1,FAM20A,FCGR3A/FCGR3B,FKBP5,FLVCR2,FNDC3A,FOXO3,FTL,GAS7,HIF1A,HLA-DPA1,HLA-DPB1,HLA-DQA1,HLA-DQA2,HLA-DQB1,HLA-DRA,HLA-DRB1,HLA-DRB5,HMOX1,HSP90AA1,HSPA1A/HSPA1B,HSPD1,HSPH1,IFI6,IFITM10,IL10,IL1B,IL1RAP,INSR…	119
Cellular Growth and Proliferation	Expansion of cells	5.98e-09		-0.145	AREG,FOXO3,HIF1A,HMOX1,HSPD1,IL10,IL1B,NLRP3,PPARG,PTEN,PTPN2,SERPINB9,STAT3,TNFAIP3,TNFSF13B,ZBTB16	16
Organismal Development,Organismal Injury and Abnormalities	Abnormal morphology of thoracic cavity	6.07e-09			ABCA1,ADAMTS2,ATF6,CTSB,FAM20A,FOXO3,HIF1A,HLA-DQA1,HMOX1,IL10,IL1B,INSR,JARID2,JUN,LITAF,LY6E,MBNL1,NFKBIA,PKP2,PPARD,PPARG,PTEN,SLC1A3,SLC39A8,STAT3,TNFAIP3,TXNIP,VCL	28
Cancer,Cellular Movement,Organismal Injury and Abnormalities,Tumor Morphology	Invasion of tumor cells	6.3e-09		-1.289	ADGRE5,AREG,CD14,CTSB,FOXO3,HIF1A,HMOX1,PTEN,S100A8,S100A9,STAT3,ZBTB16	12
Inflammatory Response	Inflammatory response of cells	6.34e-09		0.748	CD14,CTSB,IL10,IL1B,LITAF,S100A8,S100A9,STAT3	8
Cancer,Gastrointestinal Disease,Organismal Injury and Abnormalities	Digestive organ tumor	6.7e-09		0.231	ABCA1,ACOT7,ADAMTS2,ADGRE5,AGTPBP1,AMPH,ANKRD28,ANPEP,AP1S2,APOBEC3A,AREG,ARHGAP26,ATF6,BAIAP2L1,BLVRB,C1QA,C1QB,C1QC,CD14,CD163L1,CD74,CFD,CH25H,CMIP,CRYBG1,CTSB,DENND4A,DLGAP1,EEF1A1,EEPD1,FAM20A,FCGR3A/FCGR3B,FKBP5,FLVCR2,FNDC3A,FOXO3,FTL,GAS7,HIF1A,HLA-DPA1,HLA-DPB1,HLA-DQA1,HLA-DQA2,HLA-DQB1,HLA-DRA,HLA-DRB1,HLA-DRB5,HMOX1,HSP90AA1,HSPA1A/HSPA1B,HSPD1,HSPH1,IFI6,IFITM10,IL10,IL1B,IL1RAP,INSR…	120
Cell-To-Cell Signaling and Interaction	Immune response of myeloid cells	6.74e-09		-0.39	ABCA1,ANPEP,CD14,CH25H,FCGR3A/FCGR3B,HIF1A,HMOX1,IGHA1,IL10,IL1B,PPARG,PTEN,S100A9,STAT3	14
Cancer,Organismal Injury and Abnormalities	Development of adenocarcinoma	7.02e-09		0.079	ABCA1,ACOT7,ADAMTS2,AGTPBP1,AMPH,ANKRD28,ANPEP,AP1S2,APOBEC3A,AREG,ARHGAP26,ATF6,BLVRB,C1QA,C1QC,CD163L1,CRYBG1,DENND4A,DLGAP1,FAM20A,FKBP5,FLVCR2,FNDC3A,FOXO3,HIF1A,HLA-DPA1,HLA-DPB1,HLA-DQA1,HLA-DQA2,HLA-DQB1,HLA-DRB1,HSP90AA1,HSPA1A/HSPA1B,HSPD1,HSPH1,IFI6,IL10,IL1B,IL1RAP,INSR,JARID2,KCNMA1,LDLR,LY6E,MAP4K3,MAP4K4,MBNL1,MSR1,MYO9B,NFKBIA,NLRP3,NOCT,NPL,OOEP,PCNX1,PDK4,PID1,PKP2,POLR2J2/POLR2J…	85
Cardiovascular Disease,Organismal Injury and Abnormalities	Vascular lesion	7.14e-09		-0.918	ABCA1,C1QA,FTL,HIF1A,HMOX1,IL10,IL1B,LDLR,MSR1,NFKBIA,PPARG,RETN,S100A12,S100A4,STAT3,TNFAIP3	16
Cancer,Organismal Injury and Abnormalities	Generation of tumor	7.29e-09		0.418	ABCA1,ACOT7,ADAMTS2,ADGRE5,AGTPBP1,AMPH,ANKRD28,ANPEP,AP1S2,APOBEC3A,AREG,ARHGAP26,ATF6,BAIAP2L1,BLVRB,C1QA,C1QB,C1QC,CD14,CD163L1,CD74,CMIP,CRYBG1,CTSB,DENND4A,DLGAP1,DNAJB1,EEF1A1,EEPD1,FAM20A,FCGR3A/FCGR3B,FKBP5,FLVCR2,FNDC3A,FOXO3,GAS7,HIF1A,HLA-DPA1,HLA-DPB1,HLA-DQA1,HLA-DQA2,HLA-DQB1,HLA-DRB1,HMOX1,HSP90AA1,HSPA1A/HSPA1B,HSPD1,HSPH1,IFI6,IL10,IL1B,IL1RAP,INSR,JARID2,JUN,KCNMA1,LDLR,LRRFIP1,…	115
Lipid Metabolism,Molecular Transport,Small Molecule Biochemistry	Concentration of lipid	7.34e-09		-0.162	ABCA1,C1QA,CD14,CFD,EEF1A1,FKBP5,FOXO3,GAS7,HIF1A,HMOX1,IL10,IL1B,INSR,JUN,KCNMA1,LDLR,MSR1,PDK4,PPARD,PPARG,PTEN,PTPN1,RETN,S100A12,S100A8,S100A9,STAT3,TXNIP,ZBTB16	29
Cell Death and Survival	Cell viability of tumor cell lines	7.56e-09	Decreased	-2.371	ABCA1,APOBEC3A,AREG,ATF6,DENND4A,FKBP5,FOXO3,HIF1A,HMOX1,HSPA1A/HSPA1B,HSPH1,IL10,IL1B,INSR,JUN,NFKBIA,PPARD,PRKCH,PTEN,PTPN1,PTPN2,RANBP2,RNASE2,S100A4,S100A8,S100A9,STAT3,TAOK3,TNFSF13B,USP36,ZBTB16	31
Cellular Movement,Hematological System Development and Function,Immune Cell Trafficking	Cellular infiltration by lymphocytes	7.61e-09		0.744	HIF1A,HMOX1,IL10,IL1B,LDLR,MAP4K3,NFKBIA,NLRP3,PPARG,PTEN,S100A4,STAT3,TNFSF13B	13
Free Radical Scavenging	Production of reactive oxygen species	7.78e-09		0.226	ABCA1,CD14,CD52,FCGR3A/FCGR3B,FOXO3,FTL,HIF1A,HMOX1,IL10,IL1B,INSR,MSR1,MT-TE,NFKBIA,NLRP3,PPARG,PTEN,RETN,S100A8,TXNIP	20
Cancer,Hematological Disease,Immunological Disease,Organismal Injury and Abnormalities	Waldenström macroglobulinemia	7.79e-09			AMPH,CD52,FOXO3,HIF1A,HMOX1,IGHA1,JUN,MAP4K4,PKP2,PTEN,PTPN1,STAT3,STK17B,TNFAIP3	14
Cancer,Cell Death and Survival,Organismal Injury and Abnormalities,Tumor Morphology	Cell death of tumor cells	7.92e-09		-1.286	ANPEP,CD14,CD74,CTSB,EEF1A1,HIF1A,HMOX1,HSPA1A/HSPA1B,IL10,IL1B,INSR,JUN,NFKBIA,PPARD,PPARG,PTEN,SERPINB9,STAT3,TNFSF13B	19
Lipid Metabolism,Molecular Transport,Small Molecule Biochemistry	Efflux of cholesterol	8.59e-09		-0.387	ABCA1,EEPD1,IL10,IL1B,LDLR,MSR1,NFKBIA,PPARG,S100A12,S100A8,S100A9	11
Cancer,Organismal Injury and Abnormalities	Benign solid tumor	8.81e-09		-0.482	ABCA1,ADGRE5,CFD,CTSB,FAM20A,FOXO3,HIF1A,HLA-DQA1,HMOX1,INSR,JUN,LY6E,NFKBIA,PDK4,PPARD,PPARG,PRKCH,PTEN,PTPN2,RNASE1,S100A4,S100A8,S100A9,STAT3,TAOK3,TNFAIP3,TNFSF13B,VSIG4	28
Cellular Movement	Homing of cells	8.84e-09		-1.008	BAIAP2L1,CD74,CH25H,HSPD1,IL10,IL1B,JUN,LDLR,LITAF,MYO9B,PPARD,PPARG,PTEN,PTPN1,PTPN2,RNASE2,S100A12,S100A4,S100A8,S100A9,STAT3,WARS1	22
Neurological Disease,Organismal Injury and Abnormalities,Psychological Disorders	Disorder of basal ganglia	9.06e-09			AP1S2,CD74,CTSB,DNAJB1,EEF1A1,FOXO3,FTL,HLA-DQA1,HLA-DQB1,HLA-DRA,HLA-DRB5,HMOX1,HSP90AA1,HSPA1A/HSPA1B,IL10,IL1B,JUN,KCNMA1,LDLR,LY6E,MT-TP,MT2A,PPARD,PPARG,PSME1,SLC1A3,USP36,ZBTB16	28
Cell-To-Cell Signaling and Interaction	Response of antigen presenting cells	9.3e-09		-1.462	ABCA1,CD14,CD74,CH25H,HIF1A,HMOX1,HSP90AA1,IL10,IL1B,PPARG,PTEN,S100A9,SERPINB9,STAT3	14
Cell Death and Survival,Organismal Injury and Abnormalities	Cell death of leukemia cell lines	9.61e-09		0.012	CTSB,FKBP5,FOXO3,HMOX1,HSPA1A/HSPA1B,IL1B,JUN,MSR1,NFKBIA,NLRP3,PTEN,S100A8,S100A9,STAT3,TNFAIP3,TNFSF13B,ZBTB16	17
Neurological Disease,Organismal Injury and Abnormalities,Skeletal and Muscular Disorders	Neuromuscular disease with neuropathy	1.05e-08			AP1S2,AREG,CD52,CD74,CTSB,EEF1A1,FCGR3A/FCGR3B,FTL,HLA-DQA1,HLA-DQA2,HLA-DQB1,HLA-DRA,HLA-DRB1,IL10,IL1B,KCNMA1,LY6E,MT-TP,NLRP3,USP36	20
Molecular Transport	Export of molecule	1.07e-08		-0.933	ABCA1,CD14,EEPD1,HMOX1,IL10,IL1B,LDLR,MSR1,NFKBIA,PPARG,RANBP2,S100A12,S100A8,S100A9,STAT3,XPO6	16
Cell Death and Survival,Organismal Injury and Abnormalities	Cell death of mononuclear leukocytes	1.08e-08		-0.207	CTSB,FCGR3A/FCGR3B,FOXO3,HIF1A,IL10,IL1B,INSR,JUN,LGALS2,NFKBIA,PTEN,S100A8,SERPINB9,STAT3,STK17B,TNFAIP3,TNFSF13B,ZBTB16	18
Cancer,Organismal Injury and Abnormalities,Reproductive System Disease	Prostate cancer	1.1e-08			ABCA1,ACOT7,ADAMTS2,ADGRE5,ATF6,BAIAP2L1,CD14,CD163L1,CD52,CD74,CMIP,CRYBG1,DLGAP1,FCGR3A/FCGR3B,FOXO3,HIF1A,HLA-DQA1,HLA-DRB1,HMOX1,HSP90AA1,HSPH1,IL10,IL1B,IL1RAP,INSR,JARID2,JUN,KCNMA1,LDLR,LITAF,LRRFIP1,LY6E,MAP4K3,MBNL1,MSR1,NFKBIA,NLRP3,OXSR1,PCNX1,PDK4,PELI1,PID1,PPARD,PPARG,PRKCH,PTEN,PTPN1,RANBP2,RBM47,RFX2,S100A8,S100A9,SLC1A3,STAT3,TAOK3,TEX14,TNFAIP3,TNFSF13B,UBC,VCL,ZBTB16	61
Cellular Development	Maturation of cells	1.11e-08		0.548	AREG,FOXO3,GAS7,HIF1A,HLA-DRA,HMOX1,HSPA1A/HSPA1B,HSPD1,IL10,IL1B,KCNMA1,PPARD,PPARG,PTEN,PTPN1,RNASE1,RNASE2,STAT3,TNFSF13B	19
Organismal Injury and Abnormalities	Non-malignant disorder	1.27e-08		-1.009	ABCA1,ADAMTS2,ADGRE5,AREG,CD14,CD52,CFD,CTSB,FAM20A,FCGR3A/FCGR3B,FOXO3,FTL,HIF1A,HLA-DPB1,HLA-DQA1,HMOX1,HSP90AA1,HSPA1A/HSPA1B,IL10,IL1B,IL1RAP,INSR,JUN,LY6E,NFKBIA,PDK4,PPARD,PPARG,PRKCH,PTEN,PTPN2,RNASE1,RPS23,S100A4,S100A8,S100A9,STAT3,TAOK3,TNFAIP3,TNFSF13B,VSIG4,ZBTB16	42
Inflammatory Disease,Inflammatory Response,Organismal Injury and Abnormalities,Respiratory Disease	Inflammation of lung	1.31e-08	Increased	2.151	CD14,CH25H,FCGR3A/FCGR3B,FOXO3,HIF1A,HLA-DQA1,HMOX1,IL10,IL1B,KCNMA1,LDLR,NLRP3,PPARG,PTEN,S100A4,SLC39A8,STAT3	17
Cancer,Organismal Injury and Abnormalities	Growth of malignant tumor	1.31e-08		0.629	AREG,CTSB,EEF1A1,FOXO3,HIF1A,HMOX1,IL10,IL1B,INSR,JUN,LITAF,MSR1,PPARD,PPARG,PTEN,PTPN2,S100A9,STAT3,TNFSF13B,TXNIP	20
Cell Morphology,Cellular Function and Maintenance	Transmembrane potential of mitochondria	1.31e-08		-1.677	DNAJB1,FOXO3,HIF1A,HMOX1,HSPD1,IFI6,IL1B,LGALS2,MT-TE,NFKBIA,PID1,PPARD,PPARG,ZBTB16	14
Cancer,Organismal Injury and Abnormalities	Metastasis	1.33e-08		-1.309	ABCA1,ADGRE5,ANPEP,CRYBG1,CTSB,EEF1A1,FCGR3A/FCGR3B,FOXO3,FTL,GAS7,HIF1A,HLA-DRB1,HMOX1,HSP90AA1,HSPA1A/HSPA1B,IL1B,INSR,JARID2,JUN,LGALS2,MAP4K3,NFKBIA,OXSR1,PPARD,PTEN,RNASE1,S100A4,SNHG5,STAT3,TNFAIP3,TXNIP	31
Cancer,Organismal Injury and Abnormalities,Reproductive System Disease	Male genital neoplasm	1.37e-08			ABCA1,ACOT7,ADAMTS2,ADGRE5,AMPH,ATF6,BAIAP2L1,CD14,CD163L1,CD52,CD74,CMIP,CRYBG1,DLGAP1,FCGR3A/FCGR3B,FOXO3,HIF1A,HLA-DQA1,HLA-DRB1,HMOX1,HSP90AA1,HSPH1,IL10,IL1B,IL1RAP,INSR,JARID2,JUN,KCNMA1,LDLR,LITAF,LRRFIP1,LY6E,MAP4K3,MBNL1,MSR1,NFKBIA,NLRP3,OXSR1,PCNX1,PDK4,PELI1,PID1,PPARD,PPARG,PRKCH,PTEN,PTPN1,RANBP2,RBM47,RFX2,S100A8,S100A9,SLC1A3,STAT3,TAOK3,TEX14,TNFAIP3,TNFSF13B,UBC,VCL,ZBTB16	62
Cell-To-Cell Signaling and Interaction,Cellular Movement	Recruitment of myeloid cells	1.39e-08		0.138	ADGRE5,CD14,CD74,FCGR3A/FCGR3B,HSPA1A/HSPA1B,IL10,IL1B,MYO9B,NFKBIA,NLRP3,PPARG,PTEN,S100A4,S100A8,STAT3	15
Cardiovascular Disease,Organismal Injury and Abnormalities	Peripheral arterial disease	1.43e-08			ADGRE5,AMPH,ATF6,CTSB,DNAJB1,FCGR3A/FCGR3B,HLA-DRB1,HSPA1A/HSPA1B,HSPH1,MAP4K4,MSR1,PPARD,VSIG4	13
Cancer,Organismal Injury and Abnormalities	Carcinoma	1.45e-08		0.091	ABCA1,ACOT7,ADAMTS2,ADGRE5,AGTPBP1,AMPH,ANKRD28,ANPEP,AP1S2,APOBEC3A,APOO,AREG,ARHGAP26,ATF6,BAIAP2L1,BLVRB,C1QA,C1QB,C1QC,CD14,CD163L1,CD74,CFD,CH25H,CMIP,CRYBG1,CTSB,DENND4A,DLGAP1,DNAJB1,EEF1A1,EEPD1,FAM20A,FCGR3A/FCGR3B,FKBP5,FLVCR2,FNDC3A,FOXO3,FTL,GAS7,HIF1A,HLA-DPA1,HLA-DPB1,HLA-DQA1,HLA-DQA2,HLA-DQB1,HLA-DRA,HLA-DRB1,HLA-DRB5,HMOX1,HSP90AA1,HSPA1A/HSPA1B,HSPD1,HSPH1,IFI6,IFITM10,IL10,IL1B…	126
Cell-To-Cell Signaling and Interaction,Hematological System Development and Function,Immune Cell Trafficking,Inflammatory Response	Activation of phagocytes	1.47e-08		-0.029	C1QA,CD14,FCGR3A/FCGR3B,HMOX1,HSPD1,IL10,IL1B,JUN,MSR1,PDK4,PELI1,PPARG,RNASE2,S100A12,S100A8,S100A9,STAT3,VAMP8	18
Cardiovascular System Development and Function,Organ Morphology,Organismal Development,Skeletal and Muscular System Development and Function	Morphology of cardiac muscle	1.52e-08			FOXO3,HIF1A,IL1B,INSR,JUN,NFKBIA,PKP2,PPARD,PPARG,PTEN,SLC39A8,STAT3,TNFAIP3,VCL,ZBTB16	15
Cell Death and Survival,Organismal Injury and Abnormalities	Cell death of endothelial cells	1.66e-08		-0.206	CD74,FOXO3,HMOX1,HSPD1,IL1B,NFKBIA,NLRP3,PPARD,PPARG,PTEN,S100A8,STAT3,TNFAIP3	13
Cancer,Organismal Injury and Abnormalities	Nonhematologic malignant neoplasm	1.67e-08		-0.134	ABCA1,ACOT7,ADAMTS2,ADGRE5,AGTPBP1,AMPH,ANKRD28,ANPEP,AP1S2,APOBEC3A,APOO,AREG,ARHGAP26,ATF6,BAIAP2L1,BLVRB,C1QA,C1QB,C1QC,CD14,CD163L1,CD52,CD74,CFD,CH25H,CMIP,CRYBG1,CTSB,DENND4A,DLGAP1,DNAJB1,EEF1A1,EEPD1,FAM20A,FCGR3A/FCGR3B,FKBP5,FLVCR2,FNDC3A,FOXO3,FTL,GAS7,HIF1A,HLA-DPA1,HLA-DPB1,HLA-DQA1,HLA-DQA2,HLA-DQB1,HLA-DRA,HLA-DRB1,HLA-DRB5,HMOX1,HSP90AA1,HSPA1A/HSPA1B,HSPD1,HSPH1,IFI6,IFITM10,IL10…	127
Cellular Function and Maintenance,Hematological System Development and Function	Function of myeloid cells	1.7e-08		1.96	ANPEP,CD14,IL10,IL1B,MSR1,MYO9B,NFKBIA,NLRP3,PPARG,S100A4,STAT3,VSIG4	12
Cellular Development,Skeletal and Muscular System Development and Function,Tissue Development	Differentiation of muscle	1.72e-08		0.221	AREG,ARHGAP26,CFD,FOXO3,HMOX1,IL1B,JUN,LDLR,MBNL1,NFKBIA,PDK4,PPARD,PPARG,RNASE2,STAT3,TNFAIP3	16
Cardiovascular Disease,Cardiovascular System Development and Function,Organ Morphology,Organismal Development,Organismal Injury and Abnormalities	Hypertrophy of heart	1.73e-08			ABCA1,ADAMTS2,ATF6,CTSB,FOXO3,HIF1A,HMOX1,IL1B,JARID2,JUN,MBNL1,NFKBIA,PPARD,PPARG,PTEN,STAT3,TNFAIP3	17
Lipid Metabolism,Small Molecule Biochemistry	Synthesis of fatty acid	1.73e-08		-0.078	ABCA1,ACOT7,AREG,CD14,CD74,FOXO3,HIF1A,HMOX1,IL10,IL1B,LDLR,NFKBIA,PDK4,PPARD,PPARG,SLC1A3,STAT3	17
Cellular Movement	Chemotaxis	1.74e-08		-0.803	BAIAP2L1,CD74,CH25H,HSPD1,IL10,IL1B,JUN,LDLR,LITAF,MYO9B,PPARD,PPARG,PTEN,PTPN2,RNASE2,S100A12,S100A4,S100A8,S100A9,STAT3,WARS1	21
Cancer,Hematological Disease,Immunological Disease,Organismal Injury and Abnormalities	Tumorigenesis of lymphocytes	1.76e-08		0.26	ABCA1,AMPH,ANPEP,APOBEC3A,ATF6,C1QC,CD52,CD74,CMIP,CRYBG1,DENND4A,DLGAP1,EEF1A1,FCGR3A/FCGR3B,FOXO3,HIF1A,HLA-DPB1,HLA-DQA1,HLA-DQA2,HLA-DRA,HLA-DRB1,HMOX1,HSP90AA1,HSPH1,IFI6,IGHA1,IL10,IL1B,JARID2,JUN,LDLR,LRRFIP1,LY6E,MAP4K4,NFKBIA,PKP2,PPARG,PTEN,PTPN1,S100A4,S100A9,STAT3,STK17B,TEX14,TNFAIP3,TNFSF13B,VCL,WDR74,ZBTB16	49
Hematological System Development and Function,Lymphoid Tissue Structure and Development,Organ Morphology,Tissue Morphology	Morphology of lymphoid organ	1.84e-08			ABCA1,CD74,FOXO3,HLA-DQA1,HLA-DQB1,HMOX1,IL10,MSR1,NFKBIA,NLRP3,PPARG,PRKCH,PTEN,PTPN2,STAT3,STK17B,TNFAIP3,TNFSF13B,TXNIP	19
Digestive System Development and Function,Gastrointestinal Disease,Hepatic System Development and Function,Hepatic System Disease,Inflammatory Disease,Inflammatory Response,Organ Development,Organismal Injury and Abnormalities	Inflammation of liver	1.87e-08		-1.39	CD14,FCGR3A/FCGR3B,HIF1A,HLA-DQA1,HMOX1,IL10,IL1B,INSR,JUN,LDLR,NLRP3,PPARG,PTEN,PTPN2,S100A4,STAT3,TNFAIP3	17
Cell Death and Survival,Organismal Injury and Abnormalities	Apoptosis of connective tissue cells	1.87e-08		0.581	ATF6,FOXO3,IL10,IL1B,INSR,JUN,NFKBIA,NLRP3,PELI1,PPARG,PTEN,PTPN1,S100A8,STAT3,TXNIP	15
Organismal Injury and Abnormalities	Benign lesion	1.91e-08		-0.748	ABCA1,ADGRE5,CFD,CTSB,FAM20A,FOXO3,HIF1A,HLA-DQA1,HMOX1,IL10,INSR,JUN,LDLR,LY6E,NFKBIA,PDK4,PPARD,PPARG,PRKCH,PTEN,PTPN2,RNASE1,S100A4,S100A8,S100A9,STAT3,TAOK3,TNFAIP3,TNFSF13B,VSIG4	30
Carbohydrate Metabolism	Quantity of carbohydrate	1.97e-08		-1.278	ABCA1,ATF6,C1QA,CD14,EEF1A1,FOXO3,GAS7,HIF1A,IL1B,INSR,JUN,LDLR,NOCT,PDK4,PPARD,PPARG,PTEN,PTPN1,RETN,STAT3,TXNIP,ZBTB16	22
Cellular Movement,Hematological System Development and Function,Immune Cell Trafficking,Inflammatory Response	Infiltration by neutrophils	2.23e-08		1.571	CD14,CFD,CTSB,HMOX1,IL10,IL1B,NFKBIA,NLRP3,PDK4,S100A8,S100A9,STAT3,TNFAIP3	13
Hematological System Development and Function,Tissue Morphology	Quantity of antigen presenting cells	2.31e-08		-0.449	ABCA1,HIF1A,HMOX1,IL10,IL1B,INSR,LDLR,LITAF,NFKBIA,NLRP3,PPARG,PTEN,PTPN2,SLC39A8,STAT3,TNFAIP3	16
Cancer,Gastrointestinal Disease,Organismal Injury and Abnormalities	Hepato-pancreato-biliary cancer	2.32e-08		0.68	ABCA1,ACOT7,ADAMTS2,AGTPBP1,AMPH,ANPEP,AP1S2,AREG,ATF6,BAIAP2L1,CD14,CD163L1,CD74,CH25H,CRYBG1,CTSB,DENND4A,DLGAP1,EEF1A1,FTL,GAS7,HIF1A,HLA-DPA1,HLA-DQA1,HLA-DQA2,HLA-DRA,HLA-DRB1,HLA-DRB5,HMOX1,HSP90AA1,HSPA1A/HSPA1B,HSPD1,HSPH1,IFITM10,IL10,IL1B,IL1RAP,INSR,JARID2,JUN,KCNMA1,LDLR,LRRFIP1,LY6E,MAP4K3,MAP4K4,MSR1,MT2A,MYO9B,NLRP3,NOCT,NPL,OOEP,PDK4,PELI1,PID1,PKP2,PPARG,PRKCH,PTEN,PTPN1,PTPN2,RA…	84
Cancer,Hematological Disease,Organismal Injury and Abnormalities	Myelodysplastic syndrome or leukemia	2.59e-08			ANPEP,ARHGAP26,ATF6,C1QC,CD14,CD52,CD74,DLGAP1,EEF1A1,FCGR3A/FCGR3B,FOXO3,HLA-DQA1,HLA-DQB1,HLA-DRA,HLA-DRB1,HSP90AA1,HSPA1A/HSPA1B,HSPD1,HSPH1,IL10,IL1B,IL1RAP,INSR,JARID2,JUN,LY6E,MAP4K3,MSR1,PCNX1,PDK4,POLR2J2/POLR2J3,PSME1,PTEN,PTPN1,PTPN2,RANBP2,RPS23,S100A9,SNHG5,ST6GALNAC3,STAT3,TAOK3,TEX14,TNFAIP3,TNFSF13B,UBC,WDR74,ZBTB16	48
Cell Death and Survival,Organismal Injury and Abnormalities	Apoptosis of neuroblastoma cell lines	2.64e-08		1.394	DNAJB1,FOXO3,GAS7,HSPA1A/HSPA1B,IL1B,JUN,NFKBIA,PPARD,PPARG,STAT3	10
Cell-To-Cell Signaling and Interaction,Inflammatory Response	Immune response of antigen presenting cells	2.67e-08		-1.404	ABCA1,CD14,CD74,CH25H,HIF1A,HMOX1,HSP90AA1,IL10,IL1B,PPARG,PTEN,S100A9,SERPINB9	13
Cellular Function and Maintenance,Hematological System Development and Function	Function of macrophages	2.74e-08			ANPEP,CD14,IL10,IL1B,MSR1,MYO9B,NFKBIA,NLRP3,PPARG,STAT3,VSIG4	11
Hematological System Development and Function,Tissue Development	Accumulation of myeloid cells	2.8e-08		-0.706	ADGRE5,FCGR3A/FCGR3B,HIF1A,HMOX1,IL10,IL1B,LDLR,NLRP3,PTEN,S100A8,S100A9,STAT3	12
Cell Signaling,Small Molecule Biochemistry	Synthesis of nitric oxide	2.85e-08		0.213	CD14,DNAJB1,HIF1A,HLA-DRB1,HMOX1,HSP90AA1,HSPD1,IL10,IL1B,INSR,JUN,NFKBIA,PTPN2,RETN,S100A9,TNFAIP3	16
Cellular Movement,Hematological System Development and Function,Immune Cell Trafficking	Homing of leukocytes	2.9e-08		-0.994	CD74,CH25H,HSPD1,IL10,IL1B,LDLR,LITAF,MYO9B,PPARD,PPARG,PTEN,RNASE2,S100A12,S100A4,S100A8,S100A9,STAT3	17
Organismal Development	Mass of organism	2.9e-08		-0.619	ABCA1,GAS7,HIF1A,HSPA1A/HSPA1B,IL10,IL1B,INSR,LDLR,MSR1,PPARD,PPARG,PTPN1,PTPN2,RETN,STAT3,TPST1,ZBTB16	17
Organismal Injury and Abnormalities,Respiratory Disease	Acute lung injury	3.01e-08			ATF6,CD14,FCGR3A/FCGR3B,FOXO3,HLA-DQA1,IL10,IL1B,LY6E,NLRP3,RETN,STAT3	11
Cellular Movement	Invasion of cells	3.27e-08	Decreased	-2.315	ADGRE5,ANPEP,AREG,CD14,CD74,CTSB,DLGAP1,FOXO3,HIF1A,HMOX1,HSP90AA1,HSPA1A/HSPA1B,IL10,IL1B,JUN,KCNMA1,MAP4K4,MBNL1,NFKBIA,PPARD,PPARG,PTEN,PTPN1,RANBP2,S100A12,S100A4,S100A8,S100A9,STAT3,VCL,VRK2,ZBTB16	32
Cell-To-Cell Signaling and Interaction	Response of bacteria	3.31e-08		-1.664	CD14,HIF1A,IL10,MSR1,PELI1,PTEN,RETN,S100A9	8
Infectious Diseases,Organismal Injury and Abnormalities	Infection of mammalia	3.44e-08		-0.723	ADGRE5,C1QA,CD14,CD74,CFD,CH25H,HLA-DQB1,HMOX1,IL10,IL1B,MSR1,NLRP3,S100A9,SERPINB9,VSIG4	15
Cell-To-Cell Signaling and Interaction,Cellular Movement,Hematological System Development and Function,Immune Cell Trafficking,Inflammatory Response	Recruitment of phagocytes	3.49e-08		0.264	CD14,CD74,FCGR3A/FCGR3B,HSPA1A/HSPA1B,IL10,IL1B,MYO9B,NFKBIA,NLRP3,PPARG,PTEN,S100A4,S100A8,STAT3	14
Cell Death and Survival,Organismal Injury and Abnormalities	Cell death of lymphocytes	3.59e-08		-0.334	CTSB,FCGR3A/FCGR3B,FOXO3,HIF1A,IL10,IL1B,INSR,JUN,LGALS2,NFKBIA,PTEN,SERPINB9,STAT3,STK17B,TNFAIP3,TNFSF13B,ZBTB16	17
Cell-mediated Immune Response,Cellular Development,Cellular Function and Maintenance,Cellular Growth and Proliferation,Embryonic Development,Hematological System Development and Function,Hematopoiesis,Lymphoid Tissue Structure and Development,Organ Development,Organismal Development,Tissue Development	Differentiation of T lymphocytes	3.67e-08		0.91	CD74,DNAJB1,FOXO3,HIF1A,HLA-DQA1,HLA-DRA,HLA-DRB1,HSP90AA1,HSPD1,IL10,IL1B,PPARG,PTPN2,STAT3,TNFAIP3,TNFSF13B,ZBTB16	17
Inflammatory Disease,Organismal Injury and Abnormalities	Severe inflammatory disorder	3.83e-08			ANPEP,CD14,CD52,FCGR3A/FCGR3B,FOXO3,HLA-DQA1,IL10,IL1B,NFKBIA,PPARG,RNASE2,S100A12,S100A9,TNFAIP3	14
Cell Morphology,Tissue Morphology	Morphology of epithelial cells	4.08e-08			ABCA1,AMPH,AREG,CTSB,FAM20A,HIF1A,IL10,JUN,NFKBIA,PRKCH,PTEN,STAT3,TEX14,TNFAIP3	14
Cancer,Organismal Injury and Abnormalities	Incidence of tumor	4.1e-08		0.349	ABCA1,ACOT7,ADAMTS2,ADGRE5,AGTPBP1,AMPH,ANKRD28,ANPEP,AP1S2,APOBEC3A,AREG,ARHGAP26,ATF6,BAIAP2L1,BLVRB,C1QA,C1QC,CD163L1,CD74,CMIP,CRYBG1,CTSB,DENND4A,DLGAP1,EEF1A1,FAM20A,FCGR3A/FCGR3B,FKBP5,FLVCR2,FNDC3A,FOXO3,GAS7,HIF1A,HLA-DPA1,HLA-DPB1,HLA-DQA1,HLA-DQA2,HLA-DQB1,HLA-DRB1,HMOX1,HSP90AA1,HSPA1A/HSPA1B,HSPD1,HSPH1,IFI6,IL10,IL1B,IL1RAP,INSR,JARID2,JUN,KCNMA1,LDLR,LRRFIP1,LY6E,MAP4K3,MAP4K4,MBNL…	107
Cancer,Hematological Disease,Immunological Disease,Organismal Injury and Abnormalities	T-cell malignant neoplasm	4.28e-08			ABCA1,ANPEP,CD14,CD163L1,CD52,CRYBG1,FOXO3,HIF1A,HLA-DPB1,HLA-DQA1,HLA-DRA,HSP90AA1,HSPH1,IFI6,IL10,JARID2,JUN,LDLR,NFKBIA,NOCT,PELI1,PTEN,PTPN1,PTPN2,STAT3,STK17B,TNFAIP3,TNFSF13B,ZBTB16	29
Cancer,Organismal Injury and Abnormalities	Development of benign tumor	4.35e-08		-0.475	ABCA1,CTSB,FOXO3,HLA-DQA1,HMOX1,INSR,JUN,LY6E,NFKBIA,PDK4,PPARD,PPARG,PRKCH,PTEN,RNASE1,S100A4,S100A8,S100A9,STAT3,TNFAIP3,VSIG4	21
Connective Tissue Disorders,Organismal Injury and Abnormalities,Tissue Morphology	Deterioration of connective tissue	4.5e-08		0.943	AREG,CD14,CFD,FOXO3,HIF1A,IL10,IL1B,JUN,S100A4,SLC39A8,STAT3,TNFAIP3	12
Infectious Diseases,Organismal Injury and Abnormalities,Respiratory Disease	Infection of respiratory tract	4.51e-08			ANPEP,CD14,FCGR3A/FCGR3B,FOXO3,HLA-DQA1,IL10,IL1B,NFKBIA,PPARG,PTEN,RNASE2,S100A12,S100A9	13
[truncated: 200 more rows]
