# Supplementary material for: Single-Cell Sequencing of Lung Macrophages and Monocytes Reveals Novel Therapeutic Targets in COPD
Source: Cells. 2023 Dec 5;12(24):2771. doi: 10.3390/cells12242771 (PMC10741950; doi:10.3390/cells12242771)
Supplement: Supplementary file 1 [file cells-12-02771-s001.zip › Table S2_Canonical pathways- Full list.xlsx]

## Sheet: Cluster 0 vs 12
© 2000-2022 QIAGEN. All rights reserved.
Ingenuity Canonical Pathways	-log(p-value)	Ratio	z-score	Molecules
Aldosterone Signaling in Epithelial Cells	5.06	0.046	#NUM!	DNAJB1,HSPA1A/HSPA1B,HSPA4,HSPA9,HSPB1,HSPD1,HSPE1,HSPH1
NRF2-mediated Oxidative Stress Response	4.96	0.038	-1	DNAJA4,DNAJB1,FTL,HMOX1,JUND,MGST1,MGST3,SOD2,STIP1
LXR/RXR Activation	4.94	0.0538	-2.236	APOC1,APOE,CD36,MSR1,RBP4,S100A8,SCD
Acute Phase Response Signaling	4.84	0.0428	#NUM!	C1QB,C1QC,FTL,HMOX1,RBP4,SERPING1,SOD2,STAT3
Unfolded protein response	4.83	0.0667	#NUM!	DNAJA4,DNAJB1,HSPA1A/HSPA1B,HSPA4,HSPA9,HSPH1
Clathrin-mediated Endocytosis Signaling	4.69	0.0408	#NUM!	APOC1,APOE,ARF6,ARPC2,FGF18,RBP4,S100A8,UBC
Protein Ubiquitination Pathway	4.4	0.0323	#NUM!	DNAJB1,HSPA1A/HSPA1B,HSPA4,HSPA9,HSPB1,HSPD1,HSPE1,HSPH1,UBC
mTOR Signaling	4.36	0.0367	#NUM!	HMOX1,PLD3,RND3,RPS12,RPS23,RPS27,RPS4Y1,RPS8
SPINK1 General Cancer Pathway	4.28	0.0725	-1.342	MT1E,MT1G,MT1X,MT2A,STAT3
EIF2 Signaling	4.24	0.0352	#NUM!	PABPC1,RPL30,RPL41,RPS12,RPS23,RPS27,RPS4Y1,RPS8
Complement System	4.15	0.105	-1	C1QB,C1QC,CFD,SERPING1
Atherosclerosis Signaling	3.9	0.0455	#NUM!	APOC1,APOE,CD36,MSR1,RBP4,S100A8
Role of PKR in Interferon Induction and Antiviral Response	3.81	0.0438	2	COLEC12,HSPA1A/HSPA1B,HSPA4,HSPA9,MSR1,STAT3
Coronavirus Pathogenesis Pathway	3.71	0.0345	-2.449	CTSL,RPS12,RPS23,RPS27,RPS4Y1,RPS8,STAT3
Regulation of eIF4 and p70S6K Signaling	3.14	0.0328	#NUM!	PABPC1,RPS12,RPS23,RPS27,RPS4Y1,RPS8
Inhibition of Angiogenesis by TSP1	2.82	0.0769	#NUM!	CD36,SDC2,THBS1
HIF1α Signaling	2.79	0.028	0.816	HMOX1,HSPA1A/HSPA1B,HSPA4,HSPA9,MMP2,STAT3
BAG2 Signaling Pathway	2.79	0.0465	-1	HSPA1A/HSPA1B,HSPA4,HSPA9,PSME4
Glucocorticoid Receptor Signaling	2.6	0.0169	#NUM!	HLA-DRA,HLA-DRB5,HSPA1A/HSPA1B,HSPA4,HSPA9,IL2RG,MMP2,MT-ND3,SCGB1A1,STAT3
Ferroptosis Signaling Pathway	2.58	0.0309	0.447	ARF6,FTL,HMOX1,HSPB1,STAT3
Fcγ Receptor-mediated Phagocytosis in Macrophages and Monocytes	2.55	0.04	0	ARF6,ARPC2,HMOX1,PLD3
Phagosome Maturation	2.53	0.0301	#NUM!	CTSA,CTSC,CTSL,HLA-DRA,HLA-DRB5
Estrogen Biosynthesis	2.37	0.0536	#NUM!	AKR1C1/AKR1C2,AKR1C3,POR
Bladder Cancer Signaling	2.32	0.0345	#NUM!	DAPK1,FGF18,MMP2,THBS1
Production of Nitric Oxide and Reactive Oxygen Species in Macrophages	2.22	0.0254	-1.342	APOC1,APOE,RBP4,RND3,S100A8
Huntington's Disease Signaling	2.15	0.0208	#NUM!	DNAJB1,HSPA1A/HSPA1B,HSPA4,HSPA9,PSME4,UBC
IL-8 Signaling	2.07	0.0234	-2.236	CSTB,HMOX1,MMP2,PLD3,RND3
Integrin Signaling	2.07	0.0234	-1	ARF6,ARHGAP26,ARPC2,NEDD9,RND3
Choline Biosynthesis III	2.07	0.0833	#NUM!	HMOX1,PLD3
IL-12 Signaling and Production in Macrophages	2.04	0.0286	#NUM!	APOC1,APOE,RBP4,S100A8
Glioma Invasiveness Signaling	2.03	0.0405	#NUM!	CD44,MMP2,RND3
Leukotriene Biosynthesis	2	0.0769	#NUM!	LTA4H,MGST3
Xenobiotic Metabolism General Signaling Pathway	1.96	0.0272	-2	FTL,HMOX1,MGST1,MGST3
Iron homeostasis signaling pathway	1.9	0.026	#NUM!	FTL,HMOX1,HSPA9,STAT3
BEX2 Signaling Pathway	1.9	0.0361	#NUM!	LGALS1,MMP2,STAT3
Crosstalk between Dendritic Cells and Natural Killer Cells	1.78	0.0326	#NUM!	HLA-DRA,HLA-DRB5,IL2RG
Role of JAK2 in Hormone-like Cytokine Signaling	1.77	0.0588	#NUM!	PTPN1,STAT3
IL-9 Signaling	1.75	0.0571	#NUM!	IL2RG,STAT3
Glutathione Redox Reactions I	1.75	0.0571	#NUM!	MGST1,MGST3
LPS/IL-1 Mediated Inhibition of RXR Function	1.74	0.0193	#NUM!	APOC1,APOE,FABP4,MGST1,MGST3
IL-4 Signaling	1.74	0.0316	#NUM!	HLA-DRA,HLA-DRB5,IL2RG
Th1 and Th2 Activation Pathway	1.73	0.0231	#NUM!	HLA-DRA,HLA-DRB5,IL2RG,STAT3
Gαq Signaling	1.69	0.0225	-2	HMOX1,HRH1,PLD3,RND3
Methylglyoxal Degradation III	1.68	0.0526	#NUM!	AKR1C1/AKR1C2,AKR1C3
Antigen Presentation Pathway	1.66	0.0513	#NUM!	HLA-DRA,HLA-DRB5
Phagosome Formation	1.66	0.0128	-0.333	ADGRE5,ARF6,ARPC2,CD36,COLEC12,HMOX1,HRH1,MSR1,PLD3
Inhibition of Matrix Metalloproteases	1.64	0.05	#NUM!	MMP2,SDC2
IGF-1 Signaling	1.62	0.0283	#NUM!	IGFBP2,STAT3,YWHAZ
Mitochondrial Dysfunction	1.61	0.0213	#NUM!	APP,MT-ND3,SOD2,UQCRQ
Tumor Microenvironment Pathway	1.61	0.0213	0	CD44,FGF18,MMP2,STAT3
PD-1, PD-L1 cancer immunotherapy pathway	1.61	0.028	#NUM!	HLA-DRA,HLA-DRB5,IL2RG
Oncostatin M Signaling	1.58	0.0465	#NUM!	MT2A,STAT3
B Cell Development	1.57	0.0455	#NUM!	HLA-DRA,HLA-DRB5
Regulation of the Epithelial-Mesenchymal Transition Pathway	1.56	0.0205	#NUM!	FGF18,MMP2,RBPJ,STAT3
Retinoate Biosynthesis I	1.53	0.0435	#NUM!	AKR1C1/AKR1C2,AKR1C3
Coronavirus Replication Pathway	1.53	0.0435	#NUM!	CTSL,IFITM10
Pulmonary Healing Signaling Pathway	1.52	0.0199	1	MMP2,RBPJ,STAT3,THBS1
ID1 Signaling Pathway	1.52	0.0199	0	APP,MMP2,PLAC8,STAT3
IL-13 Signaling Pathway	1.52	0.0259	#NUM!	CD36,DEFB1,STAT3
Natural Killer Cell Signaling	1.5	0.0196	-2	HSPA1A/HSPA1B,HSPA4,HSPA9,PVR
Airway Pathology in Chronic Obstructive Pulmonary Disease	1.5	0.0254	#NUM!	FGF18,MMP2,RBP4
Glutathione-mediated Detoxification	1.46	0.04	#NUM!	MGST1,MGST3
MSP-RON Signaling In Macrophages Pathway	1.46	0.0246	#NUM!	HLA-DRA,HLA-DRB5,STAT3
Th1 Pathway	1.45	0.0244	#NUM!	HLA-DRA,HLA-DRB5,STAT3
Pancreatic Adenocarcinoma Signaling	1.41	0.0234	#NUM!	HMOX1,PLD3,STAT3
CSDE1 Signaling Pathway	1.37	0.0357	#NUM!	PABPC1,PABPC4
Pulmonary Fibrosis Idiopathic Signaling Pathway	1.37	0.0153	0.447	FGF18,MMP2,RBPJ,STAT3,THBS1
Neuroinflammation Signaling Pathway	1.34	0.0151	0.447	APP,HLA-DRA,HLA-DRB5,HMOX1,SOD2
FXR/RXR Activation	1.33	0.0219	#NUM!	APOC1,APOE,RBP4
Th2 Pathway	1.33	0.0219	#NUM!	HLA-DRA,HLA-DRB5,IL2RG
Bile Acid Biosynthesis, Neutral Pathway	1.33	0.0339	#NUM!	AKR1C1/AKR1C2,AKR1C3
Reelin Signaling in Neurons	1.31	0.0214	#NUM!	APOE,APP,ARPC2
Semaphorin Signaling in Neurons	1.29	0.0323	#NUM!	DPYSL2,RND3
1,25-dihydroxyvitamin D3 Biosynthesis	1.29	0.111	#NUM!	POR
Osteoarthritis Pathway	1.27	0.0165	#NUM!	FGF18,RBP4,RBPJ,S100A8
Superoxide Radicals Degradation	1.25	0.1	#NUM!	SOD2
CD40 Signaling	1.23	0.0299	#NUM!	STAT3,TNFAIP3
Remodeling of Epithelial Adherens Junctions	1.22	0.0294	#NUM!	ARF6,ARPC2
Semaphorin Neuronal Repulsive Signaling Pathway	1.22	0.0196	#NUM!	CD44,DPYSL2,PDE4B
Role of JAK1 and JAK3 in γc Cytokine Signaling	1.21	0.029	#NUM!	IL2RG,STAT3
Heme Degradation	1.21	0.0909	#NUM!	HMOX1
Inhibition of ARE-Mediated mRNA Degradation Pathway	1.17	0.0186	#NUM!	PSME4,YWHAZ,ZNF331
Necroptosis Signaling Pathway	1.17	0.0186	#NUM!	DAPK1,PELI1,UBC
Aryl Hydrocarbon Receptor Signaling	1.14	0.0182	#NUM!	HSPB1,MGST1,MGST3
HOTAIR Regulatory Pathway	1.14	0.0182	#NUM!	CD44,MMP2,STAT3
IL-10 Signaling	1.14	0.0263	#NUM!	HMOX1,STAT3
Phospholipases	1.13	0.026	#NUM!	HMOX1,PLD3
TREM1 Signaling	1.12	0.0256	#NUM!	STAT3,TREM1
VDR/RXR Activation	1.11	0.0253	#NUM!	CAMP,KLF4
Toll-like Receptor Signaling	1.11	0.0253	#NUM!	TNFAIP3,UBC
Role of IL-17A in Psoriasis	1.1	0.0714	#NUM!	S100A8
eNOS Signaling	1.1	0.0174	#NUM!	HSPA1A/HSPA1B,HSPA4,HSPA9
Maturity Onset Diabetes of Young (MODY) Signaling	1.08	0.0244	#NUM!	APOC1,APOE
JAK/STAT Signaling	1.08	0.0244	#NUM!	PTPN1,STAT3
HIPPO signaling	1.05	0.0233	#NUM!	CD44,YWHAZ
Eicosanoid Signaling	1.05	0.0233	#NUM!	AKR1C3,LTA4H
Xenobiotic Metabolism Signaling	1.03	0.0137	#NUM!	FTL,HMOX1,MGST1,MGST3
Xenobiotic Metabolism AHR Signaling Pathway	1.03	0.0227	#NUM!	MGST1,MGST3
FGF Signaling	1.01	0.0222	#NUM!	FGF18,STAT3
TR/RXR Activation	1	0.022	#NUM!	AKR1C1/AKR1C2,AKR1C3
Apelin Adipocyte Signaling Pathway	1	0.022	#NUM!	MGST1,MGST3
Granulocyte Adhesion and Diapedesis	0.996	0.0157	#NUM!	HRH1,MMP2,SDC2
Regulation Of The Epithelial Mesenchymal Transition By Growth Factors Pathway	0.991	0.0156	#NUM!	FGF18,MMP2,STAT3
Actin Nucleation by ARP-WASP Complex	0.987	0.0215	#NUM!	ARPC2,RND3
Oleate Biosynthesis II (Animals)	0.979	0.0526	#NUM!	SCD
p53 Signaling	0.951	0.0204	#NUM!	SERPINB5,THBS1
Ephrin Receptor Signaling	0.924	0.0146	#NUM!	ARPC2,SDC2,STAT3
Sirtuin Signaling Pathway	0.91	0.0123	#NUM!	APP,MT-ND3,SOD2,STAT3
Synaptogenesis Signaling Pathway	0.91	0.0123	0	APOE,ARPC2,STXBP2,THBS1
RAR Activation	0.9	0.0142	#NUM!	AKR1C1/AKR1C2,AKR1C3,RBP4
Differential Regulation of Cytokine Production in Intestinal Epithelial Cells by IL-17A and IL-17F	0.9	0.0435	#NUM!	DEFB1
IL-22 Signaling	0.883	0.0417	#NUM!	STAT3
Role of JAK family kinases in IL-6-type Cytokine Signaling	0.866	0.04	#NUM!	STAT3
ERK/MAPK Signaling	0.86	0.0136	#NUM!	HSPB1,STAT3,YWHAZ
RHOGDI Signaling	0.857	0.0136	#NUM!	ARPC2,CD44,RND3
Role of JAK1, JAK2 and TYK2 in Interferon Signaling	0.851	0.0385	#NUM!	STAT3
Bupropion Degradation	0.836	0.037	#NUM!	POR
HER-2 Signaling in Breast Cancer	0.83	0.0132	#NUM!	ARF6,MMP2,STAT3
Regulation of Actin-based Motility by Rho	0.821	0.0169	#NUM!	ARPC2,RND3
Antioxidant Action of Vitamin C	0.821	0.0169	#NUM!	HMOX1,PLD3
Oxidative Phosphorylation	0.804	0.0165	#NUM!	MT-ND3,UQCRQ
RHOA Signaling	0.777	0.0159	#NUM!	ARPC2,RND3
Neuroprotective Role of THOP1 in Alzheimer's Disease	0.777	0.0159	#NUM!	APP,CFD
TNFR2 Signaling	0.767	0.0312	#NUM!	TNFAIP3
IL-6 Signaling	0.764	0.0156	#NUM!	HSPB1,STAT3
Androgen Biosynthesis	0.754	0.0303	#NUM!	AKR1C3
The Visual Cycle	0.733	0.0286	#NUM!	AKR1C3
STAT3 Pathway	0.726	0.0147	#NUM!	IL2RG,STAT3
Interferon Signaling	0.721	0.0278	#NUM!	IFI6
p70S6K Signaling	0.717	0.0145	#NUM!	IL2RG,YWHAZ
MSP-RON Signaling In Cancer Cells Pathway	0.706	0.0143	#NUM!	STAT3,YWHAZ
RAC Signaling	0.701	0.0142	#NUM!	ARPC2,CD44
Notch Signaling	0.701	0.0263	#NUM!	RBPJ
Colorectal Cancer Metastasis Signaling	0.662	0.0109	#NUM!	MMP2,RND3,STAT3
Cardiac Hypertrophy Signaling (Enhanced)	0.65	0.00901	0.447	FGF18,HSPB1,IL2RG,PDE4B,STAT3
Endocannabinoid Cancer Inhibition Pathway	0.646	0.013	#NUM!	MMP2,NUPR1
Docosahexaenoic Acid (DHA) Signaling	0.644	0.0227	#NUM!	APP
Role of Pattern Recognition Receptors in Recognition of Bacteria and Viruses	0.636	0.0128	#NUM!	C1QB,C1QC
IL-23 Signaling Pathway	0.627	0.0217	#NUM!	STAT3
Ovarian Cancer Signaling	0.622	0.0125	#NUM!	CD44,MMP2
Epithelial Adherens Junction Signaling	0.622	0.0125	#NUM!	ARPC2,YWHAZ
CLEAR Signaling Pathway	0.62	0.0103	#NUM!	CD63,CTSA,YWHAZ
Hepatic Fibrosis Signaling Pathway	0.611	0.00926	-1	FTL,RND3,SOD2,STAT3
Cellular Effects of Sildenafil (Viagra)	0.609	0.0123	#NUM!	PABPC4,PDE4B
Acetone Degradation I (to Methylglyoxal)	0.604	0.0204	#NUM!	POR
Cell Cycle: G2/M DNA Damage Checkpoint Regulation	0.595	0.02	#NUM!	YWHAZ
FAT10 Cancer Signaling Pathway	0.595	0.02	#NUM!	STAT3
NAD Signaling Pathway	0.587	0.0118	#NUM!	HSPD1,SOD2
TNFR1 Signaling	0.582	0.0192	#NUM!	TNFAIP3
Amyloid Processing	0.582	0.0192	#NUM!	APP
Androgen Signaling	0.577	0.0116	#NUM!	DNAJB1,HSPA4
tRNA Splicing	0.573	0.0189	#NUM!	PDE4B
WNT/β-catenin Signaling	0.569	0.0115	#NUM!	CD44,UBC
Transcriptional Regulatory Network in Embryonic Stem Cells	0.567	0.0185	#NUM!	STAT3
Primary Immunodeficiency Signaling	0.554	0.0179	#NUM!	IL2RG
Retinol Biosynthesis	0.554	0.0179	#NUM!	AKR1C3
CNTF Signaling	0.547	0.0175	#NUM!	STAT3
EGF Signaling	0.535	0.0169	#NUM!	STAT3
FAT10 Signaling Pathway	0.535	0.0169	#NUM!	PSME4
PCP (Planar Cell Polarity) Pathway	0.529	0.0167	#NUM!	JUND
SPINK1 Pancreatic Cancer Pathway	0.529	0.0167	#NUM!	CTSA
T Helper Cell Differentiation	0.527	0.00847	#NUM!	HLA-DRA,HLA-DRB5,IL2RG,STAT3
IL-17 Signaling	0.52	0.0106	#NUM!	DEFB1,MMP2
Xenobiotic Metabolism CAR Signaling Pathway	0.517	0.0105	#NUM!	MGST1,MGST3
Nicotine Degradation III	0.511	0.0159	#NUM!	POR
Triacylglycerol Biosynthesis	0.511	0.0159	#NUM!	MOGAT1
IL-2 Signaling	0.511	0.0159	#NUM!	IL2RG
Xenobiotic Metabolism PXR Signaling Pathway	0.504	0.0103	#NUM!	MGST1,MGST3
ERB2-ERBB3 Signaling	0.5	0.0154	#NUM!	STAT3
Leukocyte Extravasation Signaling	0.491	0.0101	#NUM!	CD44,MMP2
Thrombopoietin Signaling	0.489	0.0149	#NUM!	STAT3
Systemic Lupus Erythematosus In T Cell Signaling Pathway	0.485	0.00772	1.342	CD44,HLA-DRA,HLA-DRB5,RND3,STAT3
Role of PI3K/AKT Signaling in the Pathogenesis of Influenza	0.484	0.0147	#NUM!	PLAC8
IL-17A Signaling in Airway Cells	0.479	0.0145	#NUM!	STAT3
PI3K/AKT Signaling	0.476	0.0098	#NUM!	IL2RG,YWHAZ
PXR/RXR Activation	0.474	0.0143	#NUM!	SCD
Endothelin-1 Signaling	0.469	0.00966	#NUM!	HMOX1,PLD3
GM-CSF Signaling	0.469	0.0141	#NUM!	STAT3
Melatonin Degradation I	0.458	0.0137	#NUM!	POR
Axonal Guidance Signaling	0.452	0.00777	#NUM!	ARPC2,DPYSL2,MMP2,SDC2
Growth Hormone Signaling	0.45	0.0133	#NUM!	STAT3
ERK5 Signaling	0.45	0.0133	#NUM!	YWHAZ
Agranulocyte Adhesion and Diapedesis	0.447	0.0093	#NUM!	HRH1,MMP2
Pyridoxal 5'-phosphate Salvage Pathway	0.445	0.0132	#NUM!	DAPK1
Nicotine Degradation II	0.445	0.0132	#NUM!	POR
Macropinocytosis Signaling	0.445	0.0132	#NUM!	ARF6
Caveolar-mediated Endocytosis Signaling	0.44	0.013	#NUM!	PTPN1
IL-3 Signaling	0.432	0.0127	#NUM!	STAT3
Leptin Signaling in Obesity	0.427	0.0125	#NUM!	STAT3
IL-7 Signaling Pathway	0.427	0.0125	#NUM!	IL2RG
FLT3 Signaling in Hematopoietic Progenitor Cells	0.419	0.0122	#NUM!	STAT3
Renal Cell Carcinoma Signaling	0.419	0.0122	#NUM!	UBC
PEDF Signaling	0.41	0.0119	#NUM!	SOD2
Estrogen-Dependent Breast Cancer Signaling	0.407	0.0118	#NUM!	AKR1C1/AKR1C2
Regulation Of The Epithelial Mesenchymal Transition In Development Pathway	0.399	0.0115	#NUM!	RBPJ
Superpathway of Melatonin Degradation	0.395	0.0114	#NUM!	POR
Prolactin Signaling	0.391	0.0112	#NUM!	STAT3
cAMP-mediated signaling	0.39	0.00837	#NUM!	PDE4B,STAT3
PDGF Signaling	0.38	0.0109	#NUM!	STAT3
Acute Myeloid Leukemia Signaling	0.374	0.0106	#NUM!	STAT3
Actin Cytoskeleton Signaling	0.37	0.00803	#NUM!	ARPC2,FGF18
Death Receptor Signaling	0.367	0.0104	#NUM!	HSPB1
Estrogen Receptor Signaling	0.362	0.00725	#NUM!	MMP2,MT-ND3,SOD2
Protein Kinase A Signaling	0.351	0.00713	#NUM!	PDE4B,PTPN1,YWHAZ
Mouse Embryonic Stem Cell Pluripotency	0.341	0.00962	#NUM!	STAT3
Breast Cancer Regulation by Stathmin1	0.336	0.0067	-1	ADGRE5,HRH1,MMP2,STAT3
Telomerase Signaling	0.332	0.00935	#NUM!	IL2RG
Cardiac Hypertrophy Signaling	0.33	0.00741	#NUM!	HSPB1,RND3
Signaling by Rho Family GTPases	0.33	0.00741	#NUM!	ARPC2,RND3
Sperm Motility	0.33	0.00741	#NUM!	PDE4B,SLC16A10
Paxillin Signaling	0.329	0.00926	#NUM!	ARF6
Sumoylation Pathway	0.326	0.00917	#NUM!	RND3
Kinetochore Metaphase Signaling Pathway	0.321	0.00901	#NUM!	CENPU
Salvage Pathways of Pyrimidine Ribonucleotides	0.31	0.0087	#NUM!	DAPK1
Role of NANOG in Mammalian Embryonic Stem Cell Pluripotency	0.297	0.00833	#NUM!	STAT3
p38 MAPK Signaling	0.297	0.00833	#NUM!	HSPB1
Oxytocin Signaling Pathway	0.296	0.0069	#NUM!	CD36,HSPB1
Cholecystokinin/Gastrin-mediated Signaling	0.287	0.00806	#NUM!	RND3
Sphingosine-1-phosphate Signaling	0.287	0.00806	#NUM!	RND3
Insulin Secretion Signaling Pathway	0.287	0.00676	#NUM!	PABPC1,STAT3
Endocannabinoid Developing Neuron Pathway	0.277	0.00781	#NUM!	STAT3
14-3-3-mediated Signaling	0.276	0.00775	#NUM!	YWHAZ
Renin-Angiotensin Signaling	0.271	0.00763	#NUM!	STAT3
HGF Signaling	0.262	0.00741	#NUM!	STAT3
Adipogenesis pathway	0.26	0.00735	#NUM!	FABP4
fMLP Signaling in Neutrophils	0.256	0.00725	#NUM!	ARPC2
GABA Receptor Signaling	0.254	0.00719	#NUM!	UBC
SNARE Signaling Pathway	0.252	0.00714	#NUM!	STXBP2
Gαi Signaling	0.246	0.00699	#NUM!	STAT3
Hereditary Breast Cancer Signaling	0.244	0.00694	#NUM!	UBC
Type I Diabetes Mellitus Signaling	0.241	0.00588	#NUM!	HLA-DRA,HLA-DRB5,HSPD1
Insulin Receptor Signaling	0.24	0.00685	#NUM!	PTPN1
ICOS-ICOSL Signaling in T Helper Cells	0.24	0.00586	#NUM!	HLA-DRA,HLA-DRB5,IL2RG
White Adipose Tissue Browning Pathway	0.229	0.00658	#NUM!	CAMP
Corticotropin Releasing Hormone Signaling	0.214	0.00621	#NUM!	JUND
Relaxin Signaling	0.208	0.00606	#NUM!	PDE4B
HMGB1 Signaling	0.204	0.00599	#NUM!	RND3
Neurovascular Coupling Signaling Pathway	0	0.00398	#NUM!	APP
Oxytocin In Brain Signaling Pathway	0	0.00495	#NUM!	PTPN1
PPARα/RXRα Activation	0	0.005	#NUM!	CD36
Hepatic Fibrosis / Hepatic Stellate Cell Activation	0	0.00505	#NUM!	MMP2
Role of NFAT in Regulation of the Immune Response	0	0.00336	#NUM!	HLA-DRA,HLA-DRB5
Calcium-induced T Lymphocyte Apoptosis	0	0.00431	#NUM!	HLA-DRA,HLA-DRB5
CXCR4 Signaling	0	0.00565	#NUM!	RND3
CD28 Signaling in T Helper Cells	0	0.00575	#NUM!	ARPC2,HLA-DRA,HLA-DRB5
IL-15 Signaling	0	0.00379	#NUM!	IL2RG,STAT3
Dendritic Cell Maturation	0	0.00337	#NUM!	HLA-DRA,HLA-DRB5
Thrombin Signaling	0	0.00433	#NUM!	RND3
Molecular Mechanisms of Cancer	0	0.0044	#NUM!	RBPJ,RND3
Lipid Antigen Presentation by CD1	0	0.0024	#NUM!	ARF6
GNRH Signaling	0	0.00505	#NUM!	MMP2
Germ Cell-Sertoli Cell Junction Signaling	0	0.00575	#NUM!	RND3
CREB Signaling in Neurons	0	0.00326	#NUM!	ADGRE5,HRH1
Allograft Rejection Signaling	0	0.00412	#NUM!	HLA-DRA,HLA-DRB5
Autoimmune Thyroid Disease Signaling	0	0.00439	#NUM!	HLA-DRA,HLA-DRB5
Graft-versus-Host Disease Signaling	0	0.00447	#NUM!	HLA-DRA,HLA-DRB5
Type II Diabetes Mellitus Signaling	0	0.00575	#NUM!	CD36
Communication between Innate and Adaptive Immune Cells	0	0.00215	#NUM!	HLA-DRA,HLA-DRB5
CDC42 Signaling	0	0.0052	#NUM!	ARPC2,HLA-DRA,HLA-DRB5
ILK Signaling	0	0.00495	#NUM!	RND3
FAK Signaling	0	0.00575	0.816	ADGRE5,ARPC2,HRH1,IL2RG,MMP2,NEDD9
Phospholipase C Signaling	0	0.00437	#NUM!	HMOX1,PLD3,RND3
Altered T Cell and B Cell Signaling in Rheumatoid Arthritis	0	0.00407	#NUM!	HLA-DRA,HLA-DRB5
Role of Macrophages, Fibroblasts and Endothelial Cells in Rheumatoid Arthritis	0	0.00299	#NUM!	STAT3
Glioblastoma Multiforme Signaling	0	0.00568	#NUM!	RND3
Regulation of IL-2 Expression in Activated and Anergic T Lymphocytes	0	0.00216	#NUM!	PABPC4
NUR77 Signaling in T Lymphocytes	0	0.0039	#NUM!	HLA-DRA,HLA-DRB5
PKCθ Signaling in T Lymphocytes	0	0.00356	#NUM!	HLA-DRA,HLA-DRB5
Antiproliferative Role of TOB in T Cell Signaling	0	0.00469	#NUM!	PABPC1,PABPC4
OX40 Signaling Pathway	0	0.00418	#NUM!	HLA-DRA,HLA-DRB5
D-myo-inositol-5-phosphate Metabolism	0	0.00488	#NUM!	PTPN1
D-myo-inositol (1,4,5,6)-Tetrakisphosphate Biosynthesis	0	0.00529	#NUM!	PTPN1
Superpathway of Inositol Phosphate Compounds	0	0.00382	#NUM!	PTPN1
D-myo-inositol (3,4,5,6)-tetrakisphosphate Biosynthesis	0	0.00529	#NUM!	PTPN1
3-phosphoinositide Degradation	0	0.00498	#NUM!	PTPN1
3-phosphoinositide Biosynthesis	0	0.00452	#NUM!	PTPN1
TEC Kinase Signaling	0	0.00344	#NUM!	RND3,STAT3
Cardiac β-adrenergic Signaling	0	0.00535	#NUM!	PDE4B
NF-κB Signaling	0	0.00351	#NUM!	PELI1,TNFAIP3
T Cell Receptor Signaling	0	0.00323	#NUM!	HLA-DRA,HLA-DRB5
G-Protein Coupled Receptor Signaling	0	0.0056	0	ADGRE5,HRH1,PDE4B,STAT3
Gustation Pathway	0	0.00448	#NUM!	CD36
Autophagy	0	0.00442	#NUM!	DAPK1
Adrenomedullin signaling pathway	0	0.00483	#NUM!	MMP2
Th17 Activation Pathway	0	0.00412	#NUM!	DEFB1,STAT3
T Cell Exhaustion Signaling Pathway	0	0.00526	#NUM!	HLA-DRA,HLA-DRB5,STAT3
Systemic Lupus Erythematosus In B Cell Signaling Pathway	0	0.00137	#NUM!	STAT3
Senescence Pathway	0	0.0033	#NUM!	SOD2

## Sheet: Cluster 2 (COPD vs ctl)
© 2000-2022 QIAGEN. All rights reserved.
Ingenuity Canonical Pathways	-log(p-value)	Ratio	z-score	Molecules
Multiple Sclerosis Signaling Pathway	15.3	0.0776	1.886	C1QA,C1QB,C1QC,HLA-DPA1,HLA-DPB1,HLA-DQA1,HLA-DQA2,HLA-DQB1,HLA-DRA,HLA-DRB1,HLA-DRB5,IL10,IL1B,JARID2,NLRP3,PPARD,PPARG,TNFSF13B
Macrophage Classical Activation Signaling Pathway	15.3	0.0867	2	CD14,HIF1A,HLA-DPA1,HLA-DPB1,HLA-DQA1,HLA-DQA2,HLA-DQB1,HLA-DRA,HLA-DRB1,HLA-DRB5,IL10,IL1B,JARID2,NFKBIA,PPARG,STAT3,TNFSF13B
Antigen Presentation Pathway	12.3	0.231	#NUM!	CD74,HLA-DPA1,HLA-DPB1,HLA-DQA1,HLA-DQA2,HLA-DQB1,HLA-DRA,HLA-DRB1,HLA-DRB5
IL-10 Signaling	11	0.132	#NUM!	BLVRB,CD14,HMOX1,IL10,IL1B,IL1RAP,JUN,MAP4K4,NFKBIA,STAT3
MSP-RON Signaling In Macrophages Pathway	10.2	0.0902	-2.714	HLA-DPA1,HLA-DPB1,HLA-DQA1,HLA-DQA2,HLA-DQB1,HLA-DRA,HLA-DRB1,HLA-DRB5,IL10,JUN,STAT3
Glucocorticoid Receptor Signaling	10.2	0.0337	#NUM!	FKBP5,FOXO3,HLA-DPA1,HLA-DPB1,HLA-DQA1,HLA-DQA2,HLA-DQB1,HLA-DRA,HLA-DRB1,HLA-DRB5,HSP90AA1,HSPA1A/HSPA1B,IL10,IL1B,JUN,NFKBIA,PDK4,POLR2J2/POLR2J3,PPARG,STAT3
B Cell Development	9.91	0.174	#NUM!	HLA-DPA1,HLA-DPB1,HLA-DQA1,HLA-DQA2,HLA-DQB1,HLA-DRA,HLA-DRB1,HLA-DRB5
Pathogen Induced Cytokine Storm Signaling Pathway	9.67	0.0426	2.5	FTL,HLA-DPA1,HLA-DPB1,HLA-DQA1,HLA-DQA2,HLA-DQB1,HLA-DRA,HLA-DRB1,HLA-DRB5,IL10,IL1B,IL1RAP,JUN,NLRP3,STAT3,TNFSF13B
Th1 Pathway	8.89	0.0813	2.646	HLA-DPA1,HLA-DPB1,HLA-DQA1,HLA-DQA2,HLA-DQB1,HLA-DRA,HLA-DRB1,HLA-DRB5,IL10,STAT3
Th1 and Th2 Activation Pathway	8.59	0.0636	#NUM!	HLA-DPA1,HLA-DPB1,HLA-DQA1,HLA-DQA2,HLA-DQB1,HLA-DRA,HLA-DRB1,HLA-DRB5,IL10,JUN,STAT3
Neuroinflammation Signaling Pathway	8.46	0.0422	1.265	HLA-DPA1,HLA-DPB1,HLA-DQA1,HLA-DQA2,HLA-DQB1,HLA-DRA,HLA-DRB1,HLA-DRB5,HMOX1,IL10,IL1B,JUN,NLRP3,SLC1A3
Th2 Pathway	8.43	0.073	#NUM!	HLA-DPA1,HLA-DPB1,HLA-DQA1,HLA-DQA2,HLA-DQB1,HLA-DRA,HLA-DRB1,HLA-DRB5,IL10,JUN
PPAR Signaling	8.18	0.0841	-1	HSP90AA1,IL1B,IL1RAP,INSR,JUN,MAP4K4,NFKBIA,PPARD,PPARG
PD-1, PD-L1 cancer immunotherapy pathway	8.18	0.0841	-1.633	HLA-DPA1,HLA-DPB1,HLA-DQA1,HLA-DQA2,HLA-DQB1,HLA-DRA,HLA-DRB1,HLA-DRB5,PTEN
IL-4 Signaling	7.33	0.0842	#NUM!	HLA-DPA1,HLA-DPB1,HLA-DQA1,HLA-DQA2,HLA-DQB1,HLA-DRA,HLA-DRB1,HLA-DRB5
Acute Phase Response Signaling	7.14	0.0535	0.816	C1QA,C1QB,C1QC,FTL,HMOX1,IL1B,IL1RAP,JUN,NFKBIA,STAT3
Toll-like Receptor Signaling	6.63	0.0886	-0.816	CD14,IL1B,JUN,MAP4K4,NFKBIA,TNFAIP3,UBC
Role of PKR in Interferon Induction and Antiviral Response	6.1	0.0584	0.816	HSP90AA1,HSPA1A/HSPA1B,IL1B,JUN,MSR1,NFKBIA,NLRP3,STAT3
Role of Pattern Recognition Receptors in Recognition of Bacteria and Viruses	5.68	0.0513	0.378	C1QA,C1QB,C1QC,IL10,IL1B,NLRP3,PRKCH,TNFSF13B
IL-6 Signaling	5.21	0.0547	0.816	CD14,IL1B,IL1RAP,JUN,MAP4K4,NFKBIA,STAT3
LXR/RXR Activation	5.17	0.0538	0.816	ABCA1,CD14,IL1B,IL1RAP,LDLR,MSR1,S100A8
Osteoarthritis Pathway	5.16	0.037	2.449	FOXO3,HIF1A,IL1B,IL1RAP,PPARD,PPARG,S100A8,S100A9,SLC39A8
PPARα/RXRα Activation	4.88	0.04	-0.378	ABCA1,HSP90AA1,IL1B,IL1RAP,INSR,JUN,MAP4K4,NFKBIA
Coronavirus Pathogenesis Pathway	4.82	0.0392	-0.707	EEF1A1,HIF1A,IL1B,JUN,NFKBIA,NLRP3,RPS23,STAT3
Hepatic Cholestasis	4.79	0.0388	#NUM!	CD14,IL1B,IL1RAP,INSR,JUN,NFKBIA,PRKCH,TNFSF13B
Type I Diabetes Mellitus Signaling	4.68	0.0235	#NUM!	HLA-DPA1,HLA-DPB1,HLA-DQA1,HLA-DQA2,HLA-DQB1,HLA-DRA,HLA-DRB1,HLA-DRB5,HSPD1,IL1B,IL1RAP,NFKBIA
Complement System	4.29	0.105	-1	C1QA,C1QB,C1QC,CFD
Aldosterone Signaling in Epithelial Cells	4.29	0.0393	#NUM!	DNAJB1,HSP90AA1,HSPA1A/HSPA1B,HSPD1,HSPH1,KCNMA1,PRKCH
Hypoxia Signaling in the Cardiovascular System	4.25	0.0658	-1	HIF1A,HSP90AA1,JUN,NFKBIA,PTEN
Erythropoietin Signaling Pathway	4.21	0.0383	-1.134	FOXO3,HIF1A,IL1B,JUN,NFKBIA,PRKCH,TNFSF13B
Altered T Cell and B Cell Signaling in Rheumatoid Arthritis	4.12	0.0223	#NUM!	HLA-DPA1,HLA-DPB1,HLA-DQA1,HLA-DQA2,HLA-DQB1,HLA-DRA,HLA-DRB1,HLA-DRB5,IL10,IL1B,TNFSF13B
BEX2 Signaling Pathway	4.04	0.0595	-1	HIF1A,JUN,NFKBIA,PTEN,STAT3
Role of Macrophages, Fibroblasts and Endothelial Cells in Rheumatoid Arthritis	4.03	0.0266	#NUM!	FCGR3A/FCGR3B,IL10,IL1B,IL1RAP,JUN,NFKBIA,PRKCH,STAT3,TNFSF13B
Dendritic Cell Maturation	4.02	0.0201	2.309	FCGR3A/FCGR3B,HLA-DPA1,HLA-DPB1,HLA-DQA1,HLA-DQA2,HLA-DQB1,HLA-DRA,HLA-DRB1,HLA-DRB5,IL10,IL1B,NFKBIA
IL-23 Signaling Pathway	3.96	0.087	0	HIF1A,IL1B,NFKBIA,STAT3
IL-12 Signaling and Production in Macrophages	3.95	0.0429	#NUM!	IL10,JUN,NFKBIA,PPARG,PRKCH,S100A8
MIF Regulation of Innate Immunity	3.92	0.0851	0	CD14,CD74,JUN,NFKBIA
Hepatic Fibrosis Signaling Pathway	3.91	0.0231	0	FTL,HIF1A,IL1B,IL1RAP,JUN,NFKBIA,PPARG,PRKCH,PTEN,STAT3
Unfolded protein response	3.9	0.0556	#NUM!	ATF6,DNAJB1,HSPA1A/HSPA1B,HSPH1,PPARG
Role Of Chondrocytes In Rheumatoid Arthritis Signaling Pathway	3.88	0.0417	0.816	FOXO3,IL1B,IL1RAP,JUN,NLRP3,STAT3
Protein Ubiquitination Pathway	3.87	0.0288	#NUM!	DNAJB1,HSP90AA1,HSPA1A/HSPA1B,HSPD1,HSPH1,PSME1,UBC,USP36
HIF1α Signaling	3.79	0.0327	-0.378	HIF1A,HMOX1,HSP90AA1,HSPA1A/HSPA1B,JUN,PRKCH,STAT3
Inflammasome pathway	3.66	0.136	#NUM!	CTSB,IL1B,NLRP3
HER-2 Signaling in Breast Cancer	3.62	0.0307	0.378	AREG,FOXO3,JUN,NFKBIA,PRKCH,PTEN,STAT3
T Helper Cell Differentiation	3.61	0.0212	#NUM!	HLA-DPA1,HLA-DPB1,HLA-DQA1,HLA-DQA2,HLA-DQB1,HLA-DRA,HLA-DRB1,HLA-DRB5,IL10,STAT3
Ferroptosis Signaling Pathway	3.6	0.037	-1.633	ABCA1,CTSB,FTL,HMOX1,SLC39A8,STAT3
T Cell Exhaustion Signaling Pathway	3.57	0.0193	#NUM!	HLA-DPA1,HLA-DPB1,HLA-DQA1,HLA-DQA2,HLA-DQB1,HLA-DRA,HLA-DRB1,HLA-DRB5,IL10,JUN,STAT3
OX40 Signaling Pathway	3.56	0.0209	#NUM!	HLA-DPA1,HLA-DPB1,HLA-DQA1,HLA-DQA2,HLA-DQB1,HLA-DRA,HLA-DRB1,HLA-DRB5,JUN,NFKBIA
Role Of Osteoclasts In Rheumatoid Arthritis Signaling Pathway	3.54	0.0257	0.707	FCGR3A/FCGR3B,FOXO3,IL10,IL1B,IL1RAP,JUN,NFKBIA,PTPN1
NRF2-mediated Oxidative Stress Response	3.52	0.0295	-1	DNAJB1,FKBP5,FTL,HMOX1,HSP90AA1,JUN,PRKCH
Role of NFAT in Regulation of the Immune Response	3.41	0.0184	1.134	FCGR3A/FCGR3B,HLA-DPA1,HLA-DPB1,HLA-DQA1,HLA-DQA2,HLA-DQB1,HLA-DRA,HLA-DRB1,HLA-DRB5,JUN,NFKBIA
ICOS-ICOSL Signaling in T Helper Cells	3.34	0.0195	1.633	HLA-DPA1,HLA-DPB1,HLA-DQA1,HLA-DQA2,HLA-DQB1,HLA-DRA,HLA-DRB1,HLA-DRB5,NFKBIA,PTEN
CD40 Signaling	3.33	0.0597	-1	JUN,NFKBIA,STAT3,TNFAIP3
CTLA4 Signaling in Cytotoxic T Lymphocytes	3.31	0.0179	-2.111	AP1S2,HLA-DPA1,HLA-DPB1,HLA-DQA1,HLA-DQA2,HLA-DQB1,HLA-DRA,HLA-DRB1,HLA-DRB5,HMOX1,JUN
CD28 Signaling in T Helper Cells	3.27	0.0192	#NUM!	HLA-DPA1,HLA-DPB1,HLA-DQA1,HLA-DQA2,HLA-DQB1,HLA-DRA,HLA-DRB1,HLA-DRB5,JUN,NFKBIA
T Cell Receptor Signaling	3.26	0.0177	2.111	FOXO3,HLA-DPA1,HLA-DPB1,HLA-DQA1,HLA-DQA2,HLA-DQB1,HLA-DRA,HLA-DRB1,HLA-DRB5,JUN,NFKBIA
Tumor Microenvironment Pathway	3.26	0.0319	0	FOXO3,HIF1A,IL10,IL1B,JUN,STAT3
TNFR2 Signaling	3.17	0.0938	#NUM!	JUN,NFKBIA,TNFAIP3
Graft-versus-Host Disease Signaling	3.14	0.0201	#NUM!	HLA-DPA1,HLA-DPB1,HLA-DQA1,HLA-DQA2,HLA-DQB1,HLA-DRA,HLA-DRB1,HLA-DRB5,IL1B
ID1 Signaling Pathway	3.1	0.0297	0.816	ATF6,FOXO3,HIF1A,PTEN,S100A9,STAT3
Systemic Lupus Erythematosus In T Cell Signaling Pathway	3.09	0.0169	2.714	HLA-DPA1,HLA-DPB1,HLA-DQA1,HLA-DQA2,HLA-DQB1,HLA-DRA,HLA-DRB1,HLA-DRB5,IL10,JUN,STAT3
TREM1 Signaling	3.08	0.0513	1	IL10,IL1B,NLRP3,STAT3
Autoimmune Thyroid Disease Signaling	3.06	0.0196	#NUM!	HLA-DPA1,HLA-DPB1,HLA-DQA1,HLA-DQA2,HLA-DQB1,HLA-DRA,HLA-DRB1,HLA-DRB5,IL10
Calcium-induced T Lymphocyte Apoptosis	3.03	0.0194	2.449	HLA-DPA1,HLA-DPB1,HLA-DQA1,HLA-DQA2,HLA-DQB1,HLA-DRA,HLA-DRB1,HLA-DRB5,PRKCH
PKCθ Signaling in T Lymphocytes	3.03	0.0178	1.89	HLA-DPA1,HLA-DPB1,HLA-DQA1,HLA-DQA2,HLA-DQB1,HLA-DRA,HLA-DRB1,HLA-DRB5,JUN,NFKBIA
Huntington's Disease Signaling	3.01	0.0242	-1	DNAJB1,HSPA1A/HSPA1B,JUN,POLR2J2/POLR2J3,PRKCH,PSME1,UBC
MIF-mediated Glucocorticoid Regulation	2.95	0.0789	#NUM!	CD14,CD74,NFKBIA
LPS-stimulated MAPK Signaling	2.94	0.0471	0	CD14,JUN,NFKBIA,PRKCH
BAG2 Signaling Pathway	2.92	0.0465	-2	CTSB,HSP90AA1,HSPA1A/HSPA1B,PSME1
Role of Hypercytokinemia/hyperchemokinemia in the Pathogenesis of Influenza	2.9	0.046	1	AREG,IL10,IL1B,NLRP3
PI3K Signaling in B Lymphocytes	2.88	0.0333	0	ATF6,FOXO3,JUN,NFKBIA,PTEN
Allograft Rejection Signaling	2.87	0.0184	#NUM!	HLA-DPA1,HLA-DPB1,HLA-DQA1,HLA-DQA2,HLA-DQB1,HLA-DRA,HLA-DRB1,HLA-DRB5,IL10
Autophagy	2.84	0.0264	-1.633	FOXO3,HIF1A,INSR,JUN,PTEN,VAMP8
Heme Degradation	2.82	0.182	#NUM!	BLVRB,HMOX1
B Cell Activating Factor Signaling	2.8	0.0698	#NUM!	JUN,NFKBIA,TNFSF13B
Immunogenic Cell Death Signaling Pathway	2.77	0.0426	0	HSP90AA1,HSPA1A/HSPA1B,IL1B,NLRP3
Prolactin Signaling	2.77	0.0426	#NUM!	JUN,KCNMA1,PRKCH,STAT3
Pyroptosis Signaling Pathway	2.73	0.0412	1	FOXO3,IL1B,NLRP3,TXNIP
NUR77 Signaling in T Lymphocytes	2.72	0.0175	#NUM!	HLA-DPA1,HLA-DPB1,HLA-DQA1,HLA-DQA2,HLA-DQB1,HLA-DRA,HLA-DRB1,HLA-DRB5,PRKCH
Pulmonary Fibrosis Idiopathic Signaling Pathway	2.7	0.0214	0.378	AREG,FOXO3,IL1B,JARID2,JUN,PTEN,STAT3
Fcγ Receptor-mediated Phagocytosis in Macrophages and Monocytes	2.68	0.04	0	FCGR3A/FCGR3B,HMOX1,PRKCH,PTEN
Androgen Signaling	2.62	0.0291	#NUM!	DNAJB1,HSP90AA1,JUN,POLR2J2/POLR2J3,PRKCH
iNOS Signaling	2.61	0.06	#NUM!	CD14,JUN,NFKBIA
FAT10 Cancer Signaling Pathway	2.61	0.06	#NUM!	EEF1A1,NFKBIA,STAT3
Role of IL-17A in Psoriasis	2.6	0.143	#NUM!	S100A8,S100A9
TNFR1 Signaling	2.58	0.0588	#NUM!	JUN,NFKBIA,TNFAIP3
Differential Regulation of Cytokine Production in Macrophages and T Helper Cells by IL-17A and IL-17F	2.38	0.111	#NUM!	IL10,IL1B
CDC42 Signaling	2.38	0.0155	#NUM!	HLA-DPA1,HLA-DPB1,HLA-DQA1,HLA-DQA2,HLA-DQB1,HLA-DRA,HLA-DRB1,HLA-DRB5,JUN
Clathrin-mediated Endocytosis Signaling	2.38	0.0255	#NUM!	AMPH,AP1S2,LDLR,S100A8,UBC
Neuregulin Signaling	2.37	0.0328	#NUM!	AREG,HSP90AA1,PRKCH,PTEN
CDX Gastrointestinal Cancer Signaling Pathway	2.28	0.0243	-0.447	IL1B,JUN,PTEN,STAT3,TNFSF13B
Activation of IRF by Cytosolic Pattern Recognition Receptors	2.28	0.0462	#NUM!	IL10,JUN,NFKBIA
ERB2-ERBB3 Signaling	2.28	0.0462	#NUM!	JUN,PTEN,STAT3
Endoplasmic Reticulum Stress Pathway	2.25	0.0952	#NUM!	ATF6,TAOK3
Thrombopoietin Signaling	2.25	0.0448	#NUM!	JUN,PRKCH,STAT3
IL-8 Signaling	2.22	0.0234	-1	HMOX1,JUN,MAP4K4,NFKBIA,PRKCH
IL-17A Signaling in Airway Cells	2.21	0.0435	#NUM!	NFKBIA,PTEN,STAT3
STAT3 Pathway	2.2	0.0294	1	IL1B,INSR,PTPN2,STAT3
Adipogenesis pathway	2.2	0.0294	#NUM!	HIF1A,NOCT,PPARG,TXNIP
Differential Regulation of Cytokine Production in Intestinal Epithelial Cells by IL-17A and IL-17F	2.17	0.087	#NUM!	IL10,IL1B
mTOR Signaling	2.17	0.0227	0	HIF1A,HMOX1,INSR,PRKCH,RPS23
MSP-RON Signaling In Cancer Cells Pathway	2.16	0.0286	-1	HIF1A,JUN,NFKBIA,STAT3
Insulin Receptor Signaling	2.09	0.0274	0	FOXO3,INSR,PTEN,PTPN1
Role of Osteoblasts, Osteoclasts and Chondrocytes in Rheumatoid Arthritis	2.09	0.0217	#NUM!	IL10,IL1B,IL1RAP,JUN,NFKBIA
Sirtuin Signaling Pathway	2.07	0.0184	-0.447	ABCA1,FOXO3,HIF1A,JUN,PPARG,STAT3
Role of JAK1, JAK2 and TYK2 in Interferon Signaling	2.07	0.0769	#NUM!	PTPN2,STAT3
VDR/RXR Activation	2.05	0.038	#NUM!	CD14,PPARD,PRKCH
IL-3 Signaling	2.05	0.038	#NUM!	JUN,PRKCH,STAT3
Role of MAPK Signaling in Inhibiting the Pathogenesis of Influenza	2.03	0.0375	#NUM!	IL1B,JUN,NFKBIA
Iron homeostasis signaling pathway	2.02	0.0261	#NUM!	FTL,HIF1A,HMOX1,STAT3
Renal Cell Carcinoma Signaling	2.02	0.037	#NUM!	HIF1A,JUN,UBC
Thyroid Cancer Signaling	2.02	0.037	#NUM!	INSR,JUN,PTEN
JAK/STAT Signaling	2.01	0.0366	#NUM!	JUN,PTPN1,STAT3
Phagosome Maturation	1.91	0.0242	#NUM!	CTSB,HLA-DRA,HLA-DRB1,HLA-DRB5
HOTAIR Regulatory Pathway	1.91	0.0242	-1	JARID2,NFKBIA,PTEN,STAT3
Wound Healing Signaling Pathway	1.9	0.0195	0.447	IL1B,IL1RAP,JUN,NFKBIA,TNFSF13B
LPS/IL-1 Mediated Inhibition of RXR Function	1.88	0.0193	0.447	ABCA1,CD14,IL1B,IL1RAP,JUN
Crosstalk between Dendritic Cells and Natural Killer Cells	1.87	0.0326	#NUM!	HLA-DRA,HLA-DRB1,HLA-DRB5
ERBB Signaling	1.86	0.0323	#NUM!	AREG,JUN,PRKCH
Ribonucleotide Reductase Signaling Pathway	1.85	0.0233	-1	FOXO3,HIF1A,JUN,STAT3
4-1BB Signaling in T Lymphocytes	1.84	0.0588	#NUM!	JUN,NFKBIA
Role of JAK2 in Hormone-like Cytokine Signaling	1.84	0.0588	#NUM!	PTPN1,STAT3
Type II Diabetes Mellitus Signaling	1.84	0.023	#NUM!	INSR,NFKBIA,PPARG,PRKCH
Airway Inflammation in Asthma	1.82	0.0571	#NUM!	IL10,RNASE2
p53 Signaling	1.8	0.0306	#NUM!	HIF1A,JUN,PTEN
Interferon Signaling	1.8	0.0556	#NUM!	IFI6,PTPN2
IL-1 Signaling	1.79	0.0303	#NUM!	IL1RAP,JUN,NFKBIA
Systemic Lupus Erythematosus In B Cell Signaling Pathway	1.76	0.0123	1	FOXO3,IGHA1,IL10,IL1B,JUN,MAP4K4,PRKCH,STAT3,TNFSF13B
IL-17A Signaling in Fibroblasts	1.75	0.0526	#NUM!	JUN,NFKBIA
VEGF Signaling	1.72	0.0286	#NUM!	FOXO3,HIF1A,VCL
IL-17 Signaling	1.72	0.0212	0	HSP90AA1,IL1B,JUN,TNFSF13B
D-myo-inositol (1,4,5,6)-Tetrakisphosphate Biosynthesis	1.71	0.0211	#NUM!	NOCT,PTEN,PTPN1,PTPN2
D-myo-inositol (3,4,5,6)-tetrakisphosphate Biosynthesis	1.71	0.0211	#NUM!	NOCT,PTEN,PTPN1,PTPN2
IGF-1 Signaling	1.71	0.0283	#NUM!	FOXO3,JUN,STAT3
CLEAR Signaling Pathway	1.69	0.0172	-0.447	CTSB,HIF1A,INSR,MAP4K3,PRKCH
Sumoylation Pathway	1.68	0.0275	#NUM!	JUN,NFKBIA,RANBP2
April Mediated Signaling	1.67	0.0476	#NUM!	JUN,NFKBIA
Xenobiotic Metabolism Signaling	1.67	0.017	#NUM!	FTL,HMOX1,HSP90AA1,IL1B,PRKCH
Production of Nitric Oxide and Reactive Oxygen Species in Macrophages	1.66	0.0203	0	JUN,NFKBIA,PRKCH,S100A8
MicroRNA Biogenesis Signaling Pathway	1.65	0.0202	-1	DNAJB1,HMOX1,HSP90AA1,POLR2J2/POLR2J3
Hepatic Fibrosis / Hepatic Stellate Cell Activation	1.65	0.0202	#NUM!	CD14,IL10,IL1B,IL1RAP
Oncostatin M Signaling	1.65	0.0465	#NUM!	MT2A,STAT3
Pulmonary Healing Signaling Pathway	1.63	0.0199	1	HIF1A,NFKBIA,PRKCH,STAT3
Oxytocin In Brain Signaling Pathway	1.62	0.0198	-1	IL1B,NLRP3,PRKCH,PTPN1
3-phosphoinositide Degradation	1.62	0.0198	#NUM!	NOCT,PTEN,PTPN1,PTPN2
ILK Signaling	1.62	0.0197	-2	HIF1A,JUN,PTEN,VCL
Estrogen Receptor Signaling	1.61	0.0145	-1.342	FOXO3,HIF1A,HSP90AA1,JUN,PRKCH,PTEN
IL-13 Signaling Pathway	1.61	0.0259	#NUM!	IL10,JUN,STAT3
PI3K/AKT Signaling	1.6	0.0195	#NUM!	FOXO3,HSP90AA1,NFKBIA,PTEN
D-myo-inositol-5-phosphate Metabolism	1.6	0.0194	#NUM!	NOCT,PTEN,PTPN1,PTPN2
Prostate Cancer Signaling	1.59	0.0254	#NUM!	HSP90AA1,NFKBIA,PTEN
RAR Activation	1.56	0.019	#NUM!	JUN,PRKCH,PTEN,ZBTB16
Cholecystokinin/Gastrin-mediated Signaling	1.53	0.0242	#NUM!	IL1B,JUN,PRKCH
Cardiac Hypertrophy Signaling (Enhanced)	1.52	0.0126	1.633	ATF6,IL1B,JUN,PRKCH,PTEN,STAT3,TNFSF13B
UVC-Induced MAPK Signaling	1.51	0.0392	#NUM!	JUN,PRKCH
UVB-Induced MAPK Signaling	1.5	0.0385	#NUM!	JUN,PRKCH
3-phosphoinositide Biosynthesis	1.49	0.018	#NUM!	NOCT,PTEN,PTPN1,PTPN2
Renin-Angiotensin Signaling	1.48	0.0231	#NUM!	JUN,PRKCH,STAT3
Role of Cytokines in Mediating Communication between Immune Cells	1.47	0.037	#NUM!	IL10,IL1B
Atherosclerosis Signaling	1.46	0.0227	#NUM!	IL1B,MSR1,S100A8
NF-κB Signaling	1.46	0.0123	0.378	IL1B,INSR,MAP4K4,NFKBIA,PELI1,TNFAIP3,TNFSF13B
EIF2 Signaling	1.44	0.0174	#NUM!	INSR,RPL30,RPS23,WARS1
HGF Signaling	1.44	0.0222	#NUM!	JUN,PRKCH,STAT3
Phagosome Formation	1.44	0.0114	0	ADGRE5,AP1S2,CD14,FCGR3A/FCGR3B,HMOX1,IGHA1,MSR1,PRKCH
CD27 Signaling in Lymphocytes	1.42	0.0351	#NUM!	JUN,NFKBIA
EGF Signaling	1.4	0.0339	#NUM!	JUN,STAT3
Role Of Osteoblasts In Rheumatoid Arthritis Signaling Pathway	1.38	0.0166	1	CTSB,IL1B,STAT3,TNFSF13B
GADD45 Signaling	1.38	0.0333	#NUM!	FOXO3,IL1B
Hereditary Breast Cancer Signaling	1.37	0.0208	#NUM!	POLR2J2/POLR2J3,PTEN,UBC
Endometrial Cancer Signaling	1.36	0.0323	#NUM!	FOXO3,PTEN
Xenobiotic Metabolism General Signaling Pathway	1.35	0.0204	#NUM!	FTL,HMOX1,PRKCH
Apelin Endothelial Signaling Pathway	1.33	0.0201	#NUM!	HIF1A,JUN,PRKCH
Creatine-phosphate Biosynthesis	1.32	0.111	#NUM!	MAP4K4
Cancer Drug Resistance By Drug Efflux	1.32	0.0308	#NUM!	FOXO3,PTEN
PTEN Signaling	1.31	0.0197	#NUM!	FOXO3,INSR,PTEN
Polyamine Regulation in Colon Cancer	1.3	0.0299	#NUM!	JUN,PPARG
SPINK1 General Cancer Pathway	1.27	0.029	#NUM!	MT2A,STAT3
Superpathway of Inositol Phosphate Compounds	1.27	0.0152	#NUM!	NOCT,PTEN,PTPN1,PTPN2
Necroptosis Signaling Pathway	1.25	0.0186	#NUM!	NLRP3,PELI1,UBC
Aryl Hydrocarbon Receptor Signaling	1.22	0.0182	#NUM!	HSP90AA1,IL1B,JUN
HMGB1 Signaling	1.21	0.018	#NUM!	IL1B,JUN,TNFSF13B
Growth Hormone Signaling	1.21	0.0267	#NUM!	PRKCH,STAT3
eNOS Signaling	1.2	0.0178	#NUM!	HSP90AA1,HSPA1A/HSPA1B,PRKCH
Macropinocytosis Signaling	1.2	0.0263	#NUM!	CD14,PRKCH
NAD Signaling Pathway	1.19	0.0176	#NUM!	HIF1A,HSPD1,POLR2J2/POLR2J3
Caveolar-mediated Endocytosis Signaling	1.19	0.026	#NUM!	INSR,PTPN1
NF-κB Activation by Viruses	1.17	0.0253	#NUM!	NFKBIA,PRKCH
WNT/β-catenin Signaling	1.16	0.0171	#NUM!	JUN,PPARD,UBC
IL-7 Signaling Pathway	1.16	0.025	#NUM!	FOXO3,JUN
Gαq Signaling	1.15	0.0169	#NUM!	HMOX1,NFKBIA,PRKCH
Maturity Onset Diabetes of Young (MODY) Signaling	1.14	0.0244	#NUM!	APOO,INSR
Tight Junction Signaling	1.14	0.0168	#NUM!	JUN,PTEN,VCL
PEDF Signaling	1.12	0.0238	#NUM!	NFKBIA,PPARG
Protein Kinase A Signaling	1.11	0.0118	-1	NFKBIA,PRKCH,PTEN,PTPN1,PTPN2
Regulation Of The Epithelial Mesenchymal Transition In Development Pathway	1.1	0.023	#NUM!	HIF1A,S100A4
Xenobiotic Metabolism AHR Signaling Pathway	1.09	0.0227	#NUM!	HSP90AA1,IL1B
Senescence Pathway	1.09	0.0132	-1	FOXO3,JUN,PDK4,PTEN
Acyl-CoA Hydrolysis	1.08	0.0625	#NUM!	ACOT7
Regulation Of The Epithelial Mesenchymal Transition By Growth Factors Pathway	1.07	0.0156	#NUM!	JUN,STAT3,TNFSF13B
TR/RXR Activation	1.06	0.022	#NUM!	HIF1A,LDLR
RANK Signaling in Osteoclasts	1.06	0.0217	#NUM!	JUN,NFKBIA
PDGF Signaling	1.06	0.0217	#NUM!	JUN,STAT3
Death Receptor Signaling	1.03	0.0208	#NUM!	MAP4K4,NFKBIA
RAN Signaling	1.01	0.0526	#NUM!	RANBP2
Small Cell Lung Cancer Signaling	1	0.0202	#NUM!	NFKBIA,PTEN
Endothelin-1 Signaling	0.996	0.0145	#NUM!	HMOX1,JUN,PRKCH
ATM Signaling	0.996	0.02	#NUM!	JUN,NFKBIA
Adrenomedullin signaling pathway	0.996	0.0145	#NUM!	HIF1A,IL1B,PPARG
Salvage Pathways of Pyrimidine Deoxyribonucleotides	0.971	0.0476	#NUM!	APOBEC3A
Integrin Signaling	0.967	0.0141	#NUM!	ARHGAP26,PTEN,VCL
Apoptosis Signaling	0.967	0.0192	#NUM!	MAP4K4,NFKBIA
Apelin Cardiomyocyte Signaling Pathway	0.967	0.0192	#NUM!	HIF1A,PRKCH
Sertoli Cell-Sertoli Cell Junction Signaling	0.963	0.014	#NUM!	JUN,PTEN,VCL
ERK/MAPK Signaling	0.943	0.0137	#NUM!	PPARG,STAT3,VRK2
D-myo-inositol (1,3,4)-trisphosphate Biosynthesis	0.932	0.0435	#NUM!	PTEN
Virus Entry via Endocytic Pathways	0.928	0.0182	#NUM!	AP1S2,PRKCH
IL-22 Signaling	0.917	0.0417	#NUM!	STAT3
Tumoricidal Function of Hepatic Natural Killer Cells	0.917	0.0417	#NUM!	SERPINB9
Choline Biosynthesis III	0.917	0.0417	#NUM!	HMOX1
Th17 Activation Pathway	0.914	0.0103	1.342	HIF1A,HSP90AA1,IL10,IL1B,STAT3
Role of JAK family kinases in IL-6-type Cytokine Signaling	0.9	0.04	#NUM!	STAT3
Salvage Pathways of Pyrimidine Ribonucleotides	0.9	0.0175	#NUM!	APOBEC3A,PRKCH
Role of MAPK Signaling in Promoting the Pathogenesis of Influenza	0.896	0.0174	#NUM!	JUN,NFKBIA
IL-17A Signaling in Gastric Cells	0.883	0.0385	#NUM!	JUN
γ-glutamyl Cycle	0.883	0.0385	#NUM!	ANPEP
Airway Pathology in Chronic Obstructive Pulmonary Disease	0.876	0.0169	#NUM!	IL1B,TNFSF13B
Role of Tissue Factor in Cancer	0.876	0.0169	#NUM!	IL1B,PTEN
Antioxidant Action of Vitamin C	0.876	0.0169	#NUM!	HMOX1,NFKBIA
p38 MAPK Signaling	0.866	0.0167	#NUM!	IL1B,IL1RAP
Pancreatic Adenocarcinoma Signaling	0.821	0.0156	#NUM!	HMOX1,STAT3
14-3-3-mediated Signaling	0.815	0.0155	#NUM!	JUN,PRKCH
Superpathway of D-myo-inositol (1,4,5)-trisphosphate Metabolism	0.812	0.0323	#NUM!	PTEN
Glioma Signaling	0.799	0.0152	#NUM!	PRKCH,PTEN
Nitric Oxide Signaling in the Cardiovascular System	0.796	0.015	#NUM!	HSP90AA1,PRKCH
Gα12/13 Signaling	0.79	0.0149	#NUM!	JUN,NFKBIA
FXR/RXR Activation	0.775	0.0146	#NUM!	IL1B,PPARG
fMLP Signaling in Neutrophils	0.77	0.0145	#NUM!	NFKBIA,PRKCH
IL-9 Signaling	0.764	0.0286	#NUM!	STAT3
Nucleotide Excision Repair Pathway	0.764	0.0286	#NUM!	POLR2J2/POLR2J3
P2Y Purigenic Receptor Signaling Pathway	0.745	0.014	#NUM!	JUN,PRKCH
TWEAK Signaling	0.742	0.027	#NUM!	NFKBIA
Cell Cycle Regulation by BTG Family Proteins	0.733	0.0263	#NUM!	NOCT
Inhibition of Angiogenesis by TSP1	0.721	0.0256	#NUM!	JUN
Mechanisms of Viral Exit from Host Cells	0.703	0.0244	#NUM!	PRKCH
Oxytocin Signaling Pathway	0.688	0.0103	#NUM!	PPARD,PPARG,PRKCH
Docosahexaenoic Acid (DHA) Signaling	0.676	0.0227	#NUM!	IL1B
Insulin Secretion Signaling Pathway	0.674	0.0102	#NUM!	INSR,PRKCH,STAT3
Epithelial Adherens Junction Signaling	0.672	0.0125	#NUM!	PTEN,VCL
Corticotropin Releasing Hormone Signaling	0.668	0.0124	#NUM!	JUN,PRKCH
Inhibition of ARE-Mediated mRNA Degradation Pathway	0.664	0.0123	#NUM!	PSME1,TNFSF13B
Breast Cancer Regulation by Stathmin1	0.66	0.00838	-0.447	ADGRE5,HIF1A,JUN,PRKCH,STAT3
Role of RIG1-like Receptors in Antiviral Innate Immunity	0.658	0.0217	#NUM!	NFKBIA
Role of OCT4 in Mammalian Embryonic Stem Cell Pluripotency	0.658	0.0217	#NUM!	JARID2
Coronavirus Replication Pathway	0.658	0.0217	#NUM!	IFITM10
Relaxin Signaling	0.652	0.0121	#NUM!	JUN,NFKBIA
G Protein Signaling Mediated by Tubby	0.65	0.0213	#NUM!	INSR
Role of IL-17F in Allergic Inflammatory Airway Diseases	0.65	0.0213	#NUM!	IL1B
Molecular Mechanisms of Cancer	0.642	0.00881	#NUM!	HIF1A,JUN,NFKBIA,PRKCH
Assembly of RNA Polymerase II Complex	0.627	0.02	#NUM!	POLR2J2/POLR2J3
Glutathione-mediated Detoxification	0.627	0.02	#NUM!	ANPEP
Communication between Innate and Adaptive Immune Cells	0.623	0.00749	#NUM!	HLA-DRA,HLA-DRB1,HLA-DRB5,IGHA1,IL10,IL1B,TNFSF13B
CXCR4 Signaling	0.613	0.0114	#NUM!	JUN,PRKCH
Melanoma Signaling	0.611	0.0192	#NUM!	PTEN
nNOS Signaling in Neurons	0.611	0.0192	#NUM!	PRKCH
Transcriptional Regulatory Network in Embryonic Stem Cells	0.597	0.0185	#NUM!	STAT3
Systemic Lupus Erythematosus Signaling	0.59	0.00787	#NUM!	FCGR3A/FCGR3B,IL10,IL1B,JUN,TNFSF13B
CSDE1 Signaling Pathway	0.583	0.0179	#NUM!	PTEN
Lymphotoxin β Receptor Signaling	0.577	0.0175	#NUM!	NFKBIA
CNTF Signaling	0.577	0.0175	#NUM!	STAT3
Primary Immunodeficiency Signaling	0.564	0.0169	#NUM!	IGHA1
Role of IL-17A in Arthritis	0.564	0.0169	#NUM!	NFKBIA
FAT10 Signaling Pathway	0.564	0.0169	#NUM!	PSME1
Granulocyte Adhesion and Diapedesis	0.562	0.0105	#NUM!	IL1B,IL1RAP
Xenobiotic Metabolism CAR Signaling Pathway	0.562	0.0105	#NUM!	HSP90AA1,PRKCH
PCP (Planar Cell Polarity) Pathway	0.558	0.0167	#NUM!	JUN
SPINK1 Pancreatic Cancer Pathway	0.558	0.0167	#NUM!	CTSB
Xenobiotic Metabolism PXR Signaling Pathway	0.556	0.0104	#NUM!	HSP90AA1,PRKCH
Regulation of the Epithelial-Mesenchymal Transition Pathway	0.55	0.0103	#NUM!	HIF1A,STAT3
GNRH Signaling	0.544	0.0102	#NUM!	JUN,PRKCH
IL-2 Signaling	0.541	0.0159	#NUM!	JUN
Leukocyte Extravasation Signaling	0.538	0.0101	#NUM!	PRKCH,VCL
Induction of Apoptosis by HIV1	0.529	0.0154	#NUM!	NFKBIA
Natural Killer Cell Signaling	0.526	0.00985	#NUM!	FCGR3A/FCGR3B,HSPA1A/HSPA1B
Ephrin Receptor Signaling	0.52	0.00976	#NUM!	MAP4K4,STAT3
Mitotic Roles of Polo-Like Kinase	0.519	0.0149	#NUM!	HSP90AA1
Role of PI3K/AKT Signaling in the Pathogenesis of Influenza	0.513	0.0147	#NUM!	NFKBIA
Remodeling of Epithelial Adherens Junctions	0.513	0.0147	#NUM!	VCL
Role of JAK1 and JAK3 in γc Cytokine Signaling	0.507	0.0145	#NUM!	STAT3
PXR/RXR Activation	0.502	0.0143	#NUM!	INSR
Agrin Interactions at Neuromuscular Junction	0.502	0.0143	#NUM!	JUN
ERBB4 Signaling	0.502	0.0143	#NUM!	PRKCH
GM-CSF Signaling	0.498	0.0141	#NUM!	STAT3
Glutamate Receptor Signaling	0.487	0.0137	#NUM!	SLC1A3
ERK5 Signaling	0.478	0.0133	#NUM!	FOXO3
Granzyme A Signaling	0.478	0.0133	#NUM!	IL1B
Pyridoxal 5'-phosphate Salvage Pathway	0.478	0.0133	#NUM!	PRKCH
G-Protein Coupled Receptor Signaling	0.471	0.00701	1.342	ADGRE5,FOXO3,JUN,NFKBIA,STAT3
Phospholipases	0.469	0.013	#NUM!	HMOX1
Melatonin Signaling	0.463	0.0128	#NUM!	PRKCH
Angiopoietin Signaling	0.463	0.0128	#NUM!	NFKBIA
GDNF Family Ligand-Receptor Interactions	0.46	0.0127	#NUM!	JUN
Leptin Signaling in Obesity	0.455	0.0125	#NUM!	STAT3
Stearate Biosynthesis I (Animals)	0.451	0.0123	#NUM!	ACOT7
FLT3 Signaling in Hematopoietic Progenitor Cells	0.446	0.0122	#NUM!	STAT3
tRNA Charging	0.446	0.0122	#NUM!	WARS1
Neurotrophin/TRK Signaling	0.442	0.012	#NUM!	JUN
Chemokine Signaling	0.438	0.0119	#NUM!	JUN
Estrogen-Dependent Breast Cancer Signaling	0.434	0.0118	#NUM!	JUN
BMP signaling pathway	0.423	0.0114	#NUM!	JUN
VEGF Family Ligand-Receptor Interactions	0.415	0.0111	#NUM!	PRKCH
Regulation of Cellular Mechanics by Calpain Protease	0.415	0.0111	#NUM!	VCL
FGF Signaling	0.415	0.0111	#NUM!	STAT3
Actin Cytoskeleton Signaling	0.413	0.00806	#NUM!	CD14,VCL
Apelin Adipocyte Signaling Pathway	0.411	0.011	#NUM!	HIF1A
Neurovascular Coupling Signaling Pathway	0.406	0.00794	#NUM!	KCNMA1,SLC1A3
Acute Myeloid Leukemia Signaling	0.4	0.0106	#NUM!	STAT3
Ceramide Signaling	0.397	0.0105	#NUM!	JUN
AMPK Signaling	0.393	0.00775	#NUM!	FOXO3,INSR
TGF-β Signaling	0.393	0.0104	#NUM!	JUN
UVA-Induced MAPK Signaling	0.383	0.0101	#NUM!	JUN
Non-Small Cell Lung Cancer Signaling	0.38	0.01	#NUM!	FOXO3
CREB Signaling in Neurons	0.376	0.00651	#NUM!	ADGRE5,INSR,POLR2J2/POLR2J3,PRKCH
Sperm Motility	0.37	0.00741	#NUM!	INSR,PRKCH
Mouse Embryonic Stem Cell Pluripotency	0.367	0.00962	#NUM!	STAT3
Neuropathic Pain Signaling In Dorsal Horn Neurons	0.364	0.00952	#NUM!	PRKCH
Colorectal Cancer Metastasis Signaling	0.359	0.00725	#NUM!	JUN,STAT3
Paxillin Signaling	0.358	0.00935	#NUM!	VCL
Telomerase Signaling	0.355	0.00926	#NUM!	HSP90AA1
NER (Nucleotide Excision Repair, Enhanced Pathway)	0.355	0.00926	#NUM!	POLR2J2/POLR2J3
Circadian Rhythm Signaling	0.35	0.00712	#NUM!	HIF1A,PRKCH
B Cell Receptor Signaling	0.345	0.00625	#NUM!	IGHA1,JUN,NFKBIA,PTEN
Opioid Signaling Pathway	0.336	0.00692	#NUM!	NFKBIA,PRKCH
α-Adrenergic Signaling	0.327	0.00847	#NUM!	PRKCH
Role of NANOG in Mammalian Embryonic Stem Cell Pluripotency	0.321	0.00833	#NUM!	STAT3
IL-15 Production	0.313	0.00813	#NUM!	INSR
Fc Epsilon RI Signaling	0.312	0.00806	#NUM!	PRKCH
GPCR-Mediated Nutrient Sensing in Enteroendocrine Cells	0.309	0.008	#NUM!	PRKCH
Neuroprotective Role of THOP1 in Alzheimer's Disease	0.304	0.00787	#NUM!	CFD
Endocannabinoid Developing Neuron Pathway	0.302	0.00781	#NUM!	STAT3
SAPK/JNK Signaling	0.292	0.00596	#NUM!	JUN,MAP4K3,MAP4K4
GP6 Signaling Pathway	0.292	0.00758	#NUM!	PRKCH
Axonal Guidance Signaling	0.28	0.00583	#NUM!	ADAMTS2,PRKCH,SRGAP2
GABA Receptor Signaling	0.279	0.00725	#NUM!	UBC
Synaptic Long Term Potentiation	0.277	0.00719	#NUM!	PRKCH
CCR3 Signaling in Eosinophils	0.277	0.00719	#NUM!	PRKCH
Reelin Signaling in Neurons	0.277	0.00719	#NUM!	PDK4
G Beta Gamma Signaling	0.277	0.00719	#NUM!	PRKCH
RAC Signaling	0.275	0.00714	#NUM!	JUN
p70S6K Signaling	0.273	0.00709	#NUM!	PRKCH
Gαi Signaling	0.269	0.00699	#NUM!	STAT3
White Adipose Tissue Browning Pathway	0.252	0.00658	#NUM!	PPARG
Factors Promoting Cardiogenesis in Vertebrates	0.249	0.00654	#NUM!	PRKCH
Endocannabinoid Cancer Inhibition Pathway	0.248	0.00649	#NUM!	HIF1A
Ovarian Cancer Signaling	0.237	0.00625	#NUM!	PTEN
Germ Cell-Sertoli Cell Junction Signaling	0.216	0.00578	#NUM!	VCL
Glioblastoma Multiforme Signaling	0.212	0.00568	#NUM!	PTEN
Regulation of eIF4 and p70S6K Signaling	0.199	0.00541	#NUM!	RPS23
Synaptic Long Term Depression	0	0.00488	#NUM!	PRKCH
CCR5 Signaling in Macrophages	0	0.00397	#NUM!	JUN,PRKCH
IL-15 Signaling	0	0.00378	#NUM!	IGHA1,STAT3
Thrombin Signaling	0	0.00433	#NUM!	PRKCH
Cardiac Hypertrophy Signaling	0	0.0037	#NUM!	JUN
FAK Signaling	0	0.00288	#NUM!	ADGRE5,JUN,PTEN
Phospholipase C Signaling	0	0.0029	#NUM!	HMOX1,PRKCH
Role of NFAT in Cardiac Hypertrophy	0	0.00437	#NUM!	PRKCH
Regulation of IL-2 Expression in Activated and Anergic T Lymphocytes	0	0.00431	#NUM!	JUN,NFKBIA
Dopamine-DARPP32 Feedback in cAMP Signaling	0	0.00503	#NUM!	PRKCH
Signaling by Rho Family GTPases	0	0.00372	#NUM!	JUN
Gap Junction Signaling	0	0.00474	#NUM!	PRKCH
Hematopoiesis from Pluripotent Stem Cells	0	0.00449	#NUM!	IGHA1,IL10
Agranulocyte Adhesion and Diapedesis	0	0.00474	#NUM!	IL1B
TEC Kinase Signaling	0	0.00344	#NUM!	PRKCH,STAT3
cAMP-mediated signaling	0	0.00418	#NUM!	STAT3

## Sheet: Cluster 15 vs 11
© 2000-2022 QIAGEN. All rights reserved.
Ingenuity Canonical Pathways	-log(p-value)	Ratio	z-score	Molecules
EIF2 Signaling	33	0.187	-3.53	ACTB,EIF1,EIF4E,INSR,PPP1R15A,RPL10A,RPL11,RPL12,RPL13,RPL15,RPL18,RPL18A,RPL19,RPL27,RPL27A,RPL28,RPL29,RPL3,RPL30,RPL35A,RPL36AL,RPL4,RPL41,RPL7,RPL7A,RPL8,RPLP1,RPS13,RPS14,RPS15,RPS18,RPS19,RPS2,RPS20,RPS23,RPS25,RPS26,RPS3,RPS4Y1,RPS5,RPS6,RPS9,UBA52
Coronavirus Pathogenesis Pathway	15.8	0.127	3.138	CXCL8,EIF4E,HIF1A,IL1B,NFKB1,NFKBIA,NLRP3,PTGS2,PYCARD,REL,RPS13,RPS14,RPS15,RPS18,RPS19,RPS2,RPS20,RPS23,RPS25,RPS26,RPS3,RPS4Y1,RPS5,RPS6,RPS9,STAT3
Toll-like Receptor Signaling	10.7	0.177	1.667	CD14,IL1A,IL1B,IL1RN,IRAK2,IRAK3,NFKB1,NFKBIA,REL,TLR4,TNF,TNFAIP3,TRAF1,UBA52
Granulocyte Adhesion and Diapedesis	10.6	0.105	#NUM!	CCL20,CCL3,CCL3L3,CCL4,CCL4L1/CCL4L2,CXCL2,CXCL3,CXCL8,EZR,FPR1,FPR2,ICAM1,IL1A,IL1B,IL1R2,IL1RAPL1,IL1RN,ITGB2,SDC4,TNF
mTOR Signaling	10.4	0.0955	1.134	EIF4E,HIF1A,INSR,PRKCE,PRKCH,RHOH,RPS13,RPS14,RPS15,RPS18,RPS19,RPS2,RPS20,RPS23,RPS25,RPS26,RPS3,RPS4Y1,RPS5,RPS6,RPS9
Role of Hypercytokinemia/hyperchemokinemia in the Pathogenesis of Influenza	10.1	0.161	3.207	AREG,CCL3,CCL4,CXCL3,CXCL8,IL1A,IL1B,IL1RN,ISG20,NFKB1,NLRP3,PYCARD,TLR4,TNF
IL-10 Signaling	9.8	0.171	#NUM!	BLVRB,CD14,FCGR2A,IL1A,IL1B,IL1R2,IL1RAPL1,IL1RN,NFKB1,NFKBIA,REL,STAT3,TNF
LXR/RXR Activation	9.69	0.123	-2.324	APOC1,APOE,CD14,CD36,IL1A,IL1B,IL1R2,IL1RAPL1,IL1RN,LDLR,NFKB1,PTGS2,REL,S100A8,TLR4,TNF
Hepatic Fibrosis Signaling Pathway	9.6	0.0647	2.6	CCL3,CXCL8,FLT1,FTL,HIF1A,ICAM1,IL1A,IL1B,IL1R2,IL1RAPL1,IL1RN,IRAK2,IRAK3,ITGB2,KLF9,MYL6,NFKB1,NFKBIA,PRKCE,PRKCH,PTEN,REL,RHOH,SDHD,SOD2,STAT3,TLR4,TNF
HER-2 Signaling in Breast Cancer	9.26	0.0877	2.236	AREG,COX4I1,COX5B,COX6A1,COX6B1,COX7C,ETS2,FCER1G,HCK,IL1A,ITGB2,NFKB1,NFKBIA,PRKCE,PRKCH,PTEN,PTGS2,REL,RPS6,STAT3
Regulation of eIF4 and p70S6K Signaling	9.12	0.0973	#NUM!	EIF1,EIF4E,ITGB2,RPS13,RPS14,RPS15,RPS18,RPS19,RPS2,RPS20,RPS23,RPS25,RPS26,RPS3,RPS4Y1,RPS5,RPS6,RPS9
Agranulocyte Adhesion and Diapedesis	9.02	0.09	#NUM!	ACTB,ACTG1,CCL20,CCL3,CCL3L3,CCL4,CCL4L1/CCL4L2,CXCL2,CXCL3,CXCL8,EZR,ICAM1,IL1A,IL1B,IL1RN,ITGB2,MYL6,SDC4,TNF
Pathogen Induced Cytokine Storm Signaling Pathway	8.87	0.0665	3.8	CCL20,CCL3,CCL3L3,CCL4,CCL4L1/CCL4L2,CXCL2,CXCL3,CXCL8,FTL,HLA-DQA2,IFNGR2,IL1A,IL1B,IL1R2,IL1RAPL1,IL1RN,IRF1,NFKB1,NLRP3,PYCARD,STAT3,STX11,STXBP2,TLR4,TNF
Neuroinflammation Signaling Pathway	8.55	0.0693	2.828	BIRC3,CCL3,CFLAR,CXCL8,HLA-DQA2,ICAM1,IFNGR2,IL1B,IRAK2,IRAK3,NFAT5,NFE2L2,NFKB1,NLRP3,PTGS2,PYCARD,REL,SLC1A2,SLC1A3,SOD2,TLR4,TNF,TYROBP
TREM1 Signaling	8.54	0.154	2.714	CCL3,CXCL3,CXCL8,ICAM1,IL1B,NFKB1,NLRP3,REL,STAT3,TLR4,TNF,TYROBP
Sirtuin Signaling Pathway	7.99	0.0675	-0.243	CXCL8,DUSP6,GABARAP,GABPB1,GADD45B,HIF1A,MAP1LC3B,MT-ND3,NAMPT,NDUFA4,NDUFB10,NFE2L2,NFKB1,PFKFB3,REL,SDHD,SLC25A6,SOD2,STAT3,TNF,TSPO,TUBA1A
PPAR Signaling	7.91	0.121	-2.887	HSP90AA1,IL1A,IL1B,IL1R2,IL1RAPL1,IL1RN,INSR,NFKB1,NFKBIA,PTGS2,REL,SCAND1,TNF
Hepatic Fibrosis / Hepatic Stellate Cell Activation	7.82	0.0859	#NUM!	CD14,CXCL3,CXCL8,ECE1,FLT1,ICAM1,IFNGR2,IL1A,IL1B,IL1R2,IL1RAPL1,KLF6,MYL6,NFKB1,REL,TLR4,TNF
Hepatic Cholestasis	7.57	0.0825	#NUM!	CD14,CXCL8,IL1A,IL1B,IL1R2,IL1RAPL1,IL1RN,INSR,IRAK2,IRAK3,NFKB1,NFKBIA,PRKCE,PRKCH,REL,TLR4,TNF
Role Of Chondrocytes In Rheumatoid Arthritis Signaling Pathway	7.22	0.0972	3.207	CFLAR,CXCL8,EGR1,IL1A,IL1B,IL1R2,IL1RAPL1,IL1RN,NFKB1,NLRP3,PTGS2,PYCARD,STAT3,TNF
iNOS Signaling	7.16	0.18	1.89	CD14,IFNGR2,IRAK2,IRAK3,IRF1,NFKB1,NFKBIA,REL,TLR4
Macrophage Classical Activation Signaling Pathway	7.09	0.0816	1.5	CCL20,CD14,CXCL8,GBP2,HIF1A,HLA-DQA2,IFNGR2,IL1A,IL1B,IRF1,NFKB1,NFKBIA,SDHD,STAT3,TLR4,TNF
IL-6 Signaling	6.97	0.102	3.317	CD14,CXCL8,IL1A,IL1B,IL1R2,IL1RAPL1,IL1RN,NFKB1,NFKBIA,REL,STAT3,TNF,TNFAIP6
Atherosclerosis Signaling	6.82	0.0985	#NUM!	APOC1,APOE,CD36,CXCL8,ICAM1,IL1A,IL1B,IL1RN,ITGB2,NFKB1,REL,S100A8,TNF
Role of PKR in Interferon Induction and Antiviral Response	6.63	0.0949	2.53	HSP90AA1,HSPA8,IFNGR2,IL1B,IRF1,NFKB1,NFKBIA,NLRP3,PYCARD,REL,STAT3,TLR4,TNF
Immunogenic Cell Death Signaling Pathway	6.62	0.117	1.508	CFLAR,FPR1,HSP90AA1,HSPA8,IFNGR2,IL1B,NFKB1,NLRP3,PYCARD,TLR4,TNF
IL-8 Signaling	6.57	0.0748	2.673	CCND3,CSTB,CXCL8,FLT1,GNG2,ICAM1,IRAK2,IRAK3,ITGB2,LIMK2,NFKB1,NFKBIA,PRKCE,PRKCH,PTGS2,RHOH
Oxidative Phosphorylation	6.37	0.0992	-2.309	ATP5MG,COX4I1,COX5B,COX6A1,COX6B1,COX7C,MT-ND3,NDUFA4,NDUFB10,SDHD,UQCR10,UQCRB
TNFR2 Signaling	6.3	0.219	1	BIRC3,NFKB1,NFKBIA,REL,TNF,TNFAIP3,TRAF1
LPS/IL-1 Mediated Inhibition of RXR Function	6.14	0.0656	1.89	ACSL1,ALDH1A2,APOC1,APOE,CD14,CHST11,FABP5,GSTP1,IL1A,IL1B,IL1R2,IL1RAPL1,IL1RN,MGST3,SLC27A4,TLR4,TNF
Glucocorticoid Receptor Signaling	6.12	0.0455	#NUM!	ACTB,CCL3,CXCL3,CXCL8,DUSP1,FKBP5,GABPB1,HLA-DQA2,HSP90AA1,HSPA8,ICAM1,IL1A,IL1B,IL1R2,IL1RN,IL2RA,MT-ND3,NDUFA4,NDUFB10,NFAT5,NFKB1,NFKBIA,PTGS2,SCGB1A1,SDHD,STAT3,TNF
CLEAR Signaling Pathway	6.11	0.0621	0.943	ATP6V0B,ATP6V0E1,ATP6V1F,ATP6V1G1,CD63,CTSB,FLT1,GABARAP,HIF1A,INSR,LAMTOR2,LAMTOR4,MAP4K3,PRKCE,PRKCH,TLR4,TNF,YWHAB
Multiple Sclerosis Signaling Pathway	6.1	0.069	1.5	C1QB,C1QC,CXCL8,DUSP1,DUSP6,HLA-DQA2,IFNGR2,IL1A,IL1B,IL2RA,IRF1,NFKB1,NLRP3,PYCARD,TLR4,TNF
Inflammasome pathway	6.09	0.273	1.633	CTSB,IL1B,NFKB1,NLRP3,PYCARD,TLR4
Role of IL-17A in Psoriasis	5.8	0.357	0.447	CCL20,CXCL3,CXCL8,S100A8,S100A9
Production of Nitric Oxide and Reactive Oxygen Species in Macrophages	5.56	0.0711	1.387	APOC1,APOE,CYBA,IFNGR2,IRF1,NFKB1,NFKBIA,PRKCE,PRKCH,REL,RHOH,S100A8,TLR4,TNF
Fcγ Receptor-mediated Phagocytosis in Macrophages and Monocytes	5.44	0.1	0.632	ACTB,ACTG1,ARPC2,EZR,FCGR2A,HCK,LCP2,PRKCE,PRKCH,PTEN
ILK Signaling	5.41	0.069	-1.387	ACTB,ACTG1,CFL1,HIF1A,ITGB2,MYL6,NACA,NFKB1,PTEN,PTGS2,REL,RHOH,TMSB10/TMSB4X,TNF
Role of Pattern Recognition Receptors in Recognition of Bacteria and Viruses	5.2	0.0769	1.667	C1QB,C1QC,CXCL8,IL1A,IL1B,NFKB1,NLRP3,PRKCE,PRKCH,REL,TLR4,TNF
IL-23 Signaling Pathway	5.18	0.152	0.816	HIF1A,IL1B,NFKB1,NFKBIA,REL,STAT3,TNF
Role of Macrophages, Fibroblasts and Endothelial Cells in Rheumatoid Arthritis	5.18	0.0533	#NUM!	CXCL8,ICAM1,IL1A,IL1B,IL1R2,IL1RAPL1,IL1RN,IRAK2,IRAK3,NFAT5,NFKB1,NFKBIA,PRKCE,PRKCH,STAT3,TLR4,TNF,TRAF1
Osteoarthritis Pathway	5.16	0.0617	3.162	CXCL8,HIF1A,IL1B,IL1R2,IL1RAPL1,ITGB2,NAMPT,NFKB1,PTGS2,REL,S100A8,S100A9,SDC4,TLR4,TNF
Mitochondrial Dysfunction	5.08	0.0691	#NUM!	ATP5MG,COX4I1,COX5B,COX6A1,COX6B1,COX7C,MT-ND3,NDUFA4,NDUFB10,SDHD,SOD2,UQCR10,UQCRB
CD40 Signaling	5.03	0.119	0.816	ICAM1,NFKB1,NFKBIA,PTGS2,REL,STAT3,TNFAIP3,TRAF1
Xenobiotic Metabolism AHR Signaling Pathway	5.03	0.102	1.414	ALDH1A2,GSTP1,HSP90AA1,IL1A,IL1B,MGST3,NFKB1,REL,TNF
IL-12 Signaling and Production in Macrophages	4.9	0.0786	#NUM!	APOC1,APOE,IRF1,NFKB1,NFKBIA,PRKCE,PRKCH,REL,S100A8,TLR4,TNF
Death Receptor Signaling	4.72	0.0938	-1.414	ACTB,ACTG1,ARHGDIB,BIRC3,CFLAR,NFKB1,NFKBIA,REL,TNF
Pyroptosis Signaling Pathway	4.69	0.0928	2.333	GBP2,IL1A,IL1B,MEFV,NFKB1,NLRP3,PYCARD,TLR4,TNF
MSP-RON Signaling In Macrophages Pathway	4.67	0.082	-2.333	HLA-DQA2,IFNGR2,ITGB2,NFKB1,NFKBIZ,PTGS2,REL,STAT3,TLR4,TNF
Differential Regulation of Cytokine Production in Intestinal Epithelial Cells by IL-17A and IL-17F	4.63	0.217	2.236	CCL3,CCL4,IL1A,IL1B,TNF
MIF-mediated Glucocorticoid Regulation	4.61	0.158	1.342	CD14,NFKB1,NFKBIA,PTGS2,REL,TLR4
RHOA Signaling	4.55	0.0794	-1.667	ABL2,ACTB,ACTG1,ARPC2,CFL1,EZR,LIMK2,MYL6,PFN1,RAPGEF2
RAR Activation	4.54	0.0616	#NUM!	ACTB,ALDH1A2,DUSP1,NFKB1,PNRC1,PRKCE,PRKCH,PTEN,REL,RPL7A,SCAND1,TNIP1,ZBTB16
Role of IL-17A in Arthritis	4.45	0.119	#NUM!	CCL20,CXCL3,CXCL8,NFKB1,NFKBIA,PTGS2,REL
Acute Phase Response Signaling	4.41	0.0642	2.333	C1QB,C1QC,FTL,IL1A,IL1B,IL1RN,NFKB1,NFKBIA,REL,SOD2,STAT3,TNF
Protein Kinase A Signaling	4.41	0.045	0	AKAP13,DUSP1,DUSP6,GNG2,MYL6,NFAT5,NFKB1,NFKBIA,PDE4B,PRKCE,PRKCH,PTEN,PTGS2,PTPN1,PTPN12,PTPN2,REL,TULP2,YWHAB
Role of JAK1, JAK2 and TYK2 in Interferon Signaling	4.35	0.192	#NUM!	IFNGR2,NFKB1,PTPN2,REL,STAT3
Aryl Hydrocarbon Receptor Signaling	4.24	0.0667	2.646	ALDH1A2,CCND3,GSTP1,HSP90AA1,IL1A,IL1B,MGST3,NFE2L2,NFKB1,REL,TNF
Clathrin-mediated Endocytosis Signaling	4.21	0.0612	#NUM!	ACTB,ACTG1,AP2S1,APOC1,APOE,ARPC2,HSPA8,ITGB2,LDLR,S100A8,SNX9,UBA52
fMLP Signaling in Neutrophils	4.21	0.0725	1.134	ARPC2,FPR1,FPR2,GNG2,NFAT5,NFKB1,NFKBIA,PRKCE,PRKCH,REL
Xenobiotic Metabolism Signaling	4.2	0.051	#NUM!	ALDH1A2,CHST11,FTL,GSTP1,HSP90AA1,IL1A,IL1B,MGST3,NFE2L2,NFKB1,PRKCE,PRKCH,REL,SCAND1,TNF
Cardiac Hypertrophy Signaling (Enhanced)	4.19	0.0397	4.025	AKAP13,ATF6,CXCL8,EIF4E,GNG2,IL1A,IL1B,IL1R2,IL2RA,ITGB2,NFAT5,NFKB1,PDE4B,PRKCE,PRKCH,PTEN,PTGS2,REL,RPS6,STAT3,TNF,TULP2
Induction of Apoptosis by HIV1	4.18	0.108	0	BIRC3,NFKB1,NFKBIA,REL,SLC25A6,TNF,TRAF1
MIF Regulation of Innate Immunity	4.07	0.128	1.342	CD14,NFKB1,NFKBIA,PTGS2,REL,TLR4
NRF2-mediated Oxidative Stress Response	4.03	0.0549	0.816	ACTB,ACTG1,BACH1,FKBP5,FTL,GSTP1,HSP90AA1,MAFF,MGST3,NFE2L2,PRKCE,PRKCH,SOD2
Estrogen Receptor Signaling	4.02	0.0435	1.387	CFL1,EIF4E,GNG2,HIF1A,HSP90AA1,LIMK2,MT-ND3,MYL6,NDUFA4,NDUFB10,NFKB1,PRKCE,PRKCH,PTEN,RBFOX2,REL,SDHD,SOD2
IL-17A Signaling in Airway Cells	4.01	0.101	0.447	CCL20,CXCL3,NFKB1,NFKBIA,PTEN,REL,STAT3
p38 MAPK Signaling	3.96	0.075	2.333	DUSP1,IL1A,IL1B,IL1R2,IL1RAPL1,IL1RN,IRAK2,IRAK3,TNF
TNFR1 Signaling	3.87	0.118	1	BIRC3,NFKB1,NFKBIA,REL,TNF,TNFAIP3
HIF1α Signaling	3.85	0.0561	1.732	ADM,EIF4E,ELOB,FLT1,HIF1A,HSP90AA1,HSPA8,PRKCE,PRKCH,RACK1,RPS6,STAT3
Erythropoietin Signaling Pathway	3.84	0.0601	-0.632	BIRC3,CXCL8,HIF1A,IL1A,IL1B,NFKB1,NFKBIA,PRKCE,PRKCH,REL,TNF
Differential Regulation of Cytokine Production in Macrophages and T Helper Cells by IL-17A and IL-17F	3.83	0.222	2	CCL3,CCL4,IL1B,TNF
Tumor Microenvironment Pathway	3.74	0.0585	2.53	CD44,CFLAR,CXCL8,HIF1A,ICAM1,IL1B,NFKB1,PTGS2,REL,STAT3,TNF
Caveolar-mediated Endocytosis Signaling	3.71	0.0909	#NUM!	ACTB,ACTG1,CD55,COPE,INSR,ITGB2,PTPN1
Necroptosis Signaling Pathway	3.65	0.0621	1.265	BIRC3,CFLAR,NLRP3,PELI1,PYCARD,SLC25A6,TLR4,TNF,TNIP1,TSPO
RHOGDI Signaling	3.63	0.0531	0	ACTB,ACTG1,ARHGDIB,ARPC2,CD44,CFL1,EZR,GNG2,ITGB2,LIMK2,MYL6,RHOH
Role of MAPK Signaling in Inhibiting the Pathogenesis of Influenza	3.61	0.0875	1.89	CXCL8,IL1B,NFKB1,NFKBIA,PTGS2,TLR4,TNF
TWEAK Signaling	3.59	0.135	-1	BIRC3,NFKB1,NFKBIA,REL,TRAF1
Complement System	3.54	0.132	-2	C1QB,C1QC,CD55,CFD,ITGB2
HMGB1 Signaling	3.53	0.0599	2.828	CXCL8,ICAM1,IFNGR2,IL1A,IL1B,NFKB1,REL,RHOH,TLR4,TNF
Leukocyte Extravasation Signaling	3.52	0.0553	-0.632	ACTB,ACTG1,CD44,CYBA,EZR,ICAM1,ITGB2,MYL6,PRKCE,PRKCH,RHOH
Pulmonary Healing Signaling Pathway	3.49	0.0547	2.111	CFL1,HCK,HIF1A,NFKB1,NFKBIA,PRKCE,PRKCH,STAT3,THBS1,TLR4,TNF
GADD45 Signaling	3.48	0.1	-2.449	CCND3,GADD45B,IL1B,NFKB1,REL,TNF
BEX2 Signaling Pathway	3.47	0.0833	-0.447	HIF1A,LGALS1,NFKB1,NFKBIA,PTEN,REL,STAT3
Oxytocin In Brain Signaling Pathway	3.47	0.0545	-0.302	GNG2,IL1B,NFKB1,NLRP3,PRKCE,PRKCH,PTGS2,PTPN1,PYCARD,TLR4,TNF
LPS-stimulated MAPK Signaling	3.44	0.0824	0.816	CD14,NFKB1,NFKBIA,PRKCE,PRKCH,REL,TLR4
PI3K/AKT Signaling	3.41	0.0537	0.378	EIF4E,HSP90AA1,IL1R2,IL2RA,ITGB2,NFKB1,NFKBIA,PTEN,PTGS2,REL,YWHAB
Type II Diabetes Mellitus Signaling	3.39	0.0575	1.633	ACSL1,CD36,INSR,NFKB1,NFKBIA,PRKCE,PRKCH,REL,SLC27A4,TNF
April Mediated Signaling	3.33	0.119	1	NFAT5,NFKB1,NFKBIA,REL,TRAF1
B Cell Activating Factor Signaling	3.28	0.116	#NUM!	NFAT5,NFKB1,NFKBIA,REL,TRAF1
Role of Tissue Factor in Cancer	3.28	0.0678	#NUM!	CFL1,CXCL8,EGR1,EIF4E,HCK,IL1B,LIMK2,PTEN
PI3K Signaling in B Lymphocytes	3.23	0.06	1.414	ATF6,MALT1,NFAT5,NFKB1,NFKBIA,PIK3AP1,PTEN,REL,TLR4
Crosstalk between Dendritic Cells and Natural Killer Cells	3.23	0.0761	1	ACTB,ACTG1,NFKB1,REL,TLR4,TNF,TYROBP
Neuregulin Signaling	3.19	0.0656	0.816	AREG,EREG,HSP90AA1,ITGB2,PRKCE,PRKCH,PTEN,RPS6
IL-17A Signaling in Gastric Cells	3.18	0.154	#NUM!	CCL20,CXCL8,NFKB1,TNF
Cholecystokinin/Gastrin-mediated Signaling	3.14	0.0645	2.828	IL1A,IL1B,IL1RN,PRKCE,PRKCH,PTGS2,RHOH,TNF
Role of IL-17F in Allergic Inflammatory Airway Diseases	3.1	0.106	2	CCL4,CXCL8,IL1B,NFKB1,REL
p53 Signaling	3.07	0.0714	2.236	GADD45B,HIF1A,HIPK2,PMAIP1,PTEN,THBS1,TP53BP2
Small Cell Lung Cancer Signaling	3.04	0.0707	#NUM!	CCND3,NFKB1,NFKBIA,PTEN,PTGS2,REL,TRAF1
IL-1 Signaling	3.04	0.0707	2.236	GNG2,IL1A,IRAK2,IRAK3,NFKB1,NFKBIA,REL
FAT10 Cancer Signaling Pathway	2.98	0.1	2	NFKB1,NFKBIA,REL,STAT3,TNF
Signaling by Rho Family GTPases	2.96	0.0446	-0.707	ACTB,ACTG1,ARPC2,CFL1,EZR,GNG2,ITGB2,LIMK2,MYL6,NFKB1,REL,RHOH
HOTAIR Regulatory Pathway	2.94	0.0545	0.707	CD44,ICAM1,IRF1,NFKB1,NFKBIA,PTEN,REL,STAT3,TLR4
PPARα/RXRα Activation	2.92	0.05	-2.121	CD36,GK,HSP90AA1,IL1B,IL1R2,IL1RAPL1,INSR,NFKB1,NFKBIA,REL
Apoptosis Signaling	2.92	0.0673	-0.816	BCL2A1,BIRC3,NFKB1,NFKBIA,PRKCE,REL,TNF
Role Of Osteoclasts In Rheumatoid Arthritis Signaling Pathway	2.9	0.0418	2.309	BIRC3,FCGR2A,IL1B,IL1R2,IL1RAPL1,LCP2,NFKB1,NFKBIA,PTPN1,RHOH,TLR4,TNF,TYROBP
STAT3 Pathway	2.88	0.0588	1.633	FLT1,IL1A,IL1B,IL1R2,IL2RA,INSR,PTPN2,STAT3
Natural Killer Cell Signaling	2.87	0.0493	1	CFL1,FCER1G,FCGR2A,HSPA8,LCP2,LIMK2,NFAT5,NFKB1,REL,TYROBP
Role of Cytokines in Mediating Communication between Immune Cells	2.83	0.0926	#NUM!	CXCL8,IL1A,IL1B,IL1RN,TNF
Virus Entry via Endocytic Pathways	2.78	0.0636	#NUM!	ACTB,ACTG1,AP2S1,CD55,ITGB2,PRKCE,PRKCH
Actin Cytoskeleton Signaling	2.74	0.0444	-1.667	ACTB,ACTG1,ARPC2,CD14,CFL1,EZR,ITGB2,LIMK2,MYL6,PFN1,TMSB10/TMSB4X
4-1BB Signaling in T Lymphocytes	2.74	0.118	#NUM!	NFKB1,NFKBIA,REL,TRAF1
IL-9 Signaling	2.69	0.114	#NUM!	NFKB1,REL,STAT3,TNF
Role of MAPK Signaling in Promoting the Pathogenesis of Influenza	2.67	0.0609	-1.134	ATP6V0B,ATP6V0E1,ATP6V1F,ATP6V1G1,NFKB1,NFKBIA,PTGS2
MSP-RON Signaling Pathway	2.65	0.0847	#NUM!	ACTB,ACTG1,ITGB2,TLR4,TNF
BAG2 Signaling Pathway	2.65	0.0698	-1	CTSB,HSP90AA1,HSPA8,NFKB1,PSMA7,REL
Regulation of Actin-based Motility by Rho	2.62	0.0598	-1.342	ACTB,ARPC2,CFL1,ITGB2,MYL6,PFN1,RHOH
Iron homeostasis signaling pathway	2.56	0.0523	#NUM!	ATP6V0B,ATP6V0E1,ATP6V1F,ATP6V1G1,CIAO2B,FTL,HIF1A,STAT3
IL-17A Signaling in Fibroblasts	2.55	0.105	#NUM!	NFKB1,NFKBIA,NFKBIZ,REL
IL-17 Signaling	2.54	0.0476	2.333	CCL20,CXCL3,CXCL8,HSP90AA1,IL1A,IL1B,NFKB1,PTGS2,TNF
Xenobiotic Metabolism CAR Signaling Pathway	2.51	0.0471	-1.667	ALDH1A2,CHST11,GSTP1,HSP90AA1,MGST3,PRKCE,PRKCH,RACK1,SCAND1
IL-15 Production	2.5	0.0569	2.449	ABL2,FLT1,HCK,INSR,IRF1,NFKB1,REL
Th1 Pathway	2.5	0.0569	1	HLA-DQA2,ICAM1,IFNGR2,IRF1,ITGB2,NFKB1,STAT3
Role of Osteoblasts, Osteoclasts and Chondrocytes in Rheumatoid Arthritis	2.47	0.0435	#NUM!	BIRC3,IL1A,IL1B,IL1R2,IL1RAPL1,IL1RN,NFAT5,NFKB1,NFKBIA,TNF
Phagosome Formation	2.45	0.0298	1.528	ADGRE2,ADGRE5,ARPC2,CCRL2,CD14,CD36,CFL1,FCER1G,FCGR2A,FPR1,FPR2,GPR132,GPR183,HCK,ITGB2,LIMK2,MALT1,MYL6,PRKCE,PRKCH,TLR4
Mechanisms of Viral Exit from Host Cells	2.43	0.0976	#NUM!	ACTB,ACTG1,PRKCE,PRKCH
ID1 Signaling Pathway	2.35	0.0446	1	ATF6,EGR1,HCK,HIF1A,NFKB1,PTEN,S100A9,STAT3,TNF
CDX Gastrointestinal Cancer Signaling Pathway	2.29	0.0437	-0.707	CXCL8,IL1A,IL1B,NFKB1,PTEN,PTGS2,REL,STAT3,TNF
Pulmonary Fibrosis Idiopathic Signaling Pathway	2.27	0.0367	2.53	ACTB,ACTG1,AREG,EGR1,IL1B,NFKB1,PMAIP1,PTEN,REL,SFTPC,STAT3,THBS1
Th1 and Th2 Activation Pathway	2.24	0.0462	#NUM!	HLA-DQA2,ICAM1,IFNGR2,IL2RA,IRF1,ITGB2,NFKB1,STAT3
RAC Signaling	2.2	0.05	0.447	ARPC2,CD44,CFL1,ITGB2,LIMK2,NFKB1,REL
MSP-RON Signaling In Cancer Cells Pathway	2.2	0.05	0	ETS2,HIF1A,NFKB1,NFKBIA,REL,STAT3,YWHAB
PD-1, PD-L1 cancer immunotherapy pathway	2.18	0.0561	0.447	HLA-DQA2,IFNGR2,IL2RA,LCP2,PTEN,TNF
Wound Healing Signaling Pathway	2.15	0.0391	2.53	CXCL8,IFNGR2,IL1A,IL1B,IL1R2,IL1RAPL1,IL1RN,NFKB1,NFKBIA,TNF
Sumoylation Pathway	2.14	0.055	#NUM!	ARHGDIB,ISG20,NFKB1,NFKBIA,RANBP2,RHOH
NF-κB Activation by Viruses	2.11	0.0633	2	NFKB1,NFKBIA,PRKCE,PRKCH,REL
Pathogenesis of Multiple Sclerosis	2.09	0.222	#NUM!	CCL3,CCL4
MYC Mediated Apoptosis Signaling	2.09	0.0784	0	CFLAR,NFKB1,PMAIP1,TNF
Senescence Pathway	2.08	0.0362	1.897	CCND3,CXCL8,EIF4E,ETS2,GADD45B,HIPK2,IL1A,NFAT5,NFKB1,PTEN,SOD2
Apelin Endothelial Signaling Pathway	2.05	0.047	1.342	GNG2,HIF1A,ICAM1,NFKB1,PRKCE,PRKCH,REL
Maturity Onset Diabetes of Young (MODY) Signaling	2.04	0.061	#NUM!	APOC1,APOE,APOO,INSR,NFKB1
Autophagy	2.03	0.0396	-0.333	GABARAP,HIF1A,INSR,MAP1LC3B,NFKB1,PTEN,TLR4,TNF,VAMP8
PEDF Signaling	2	0.0595	#NUM!	CFLAR,NFKB1,NFKBIA,REL,SOD2
Airway Pathology in Chronic Obstructive Pulmonary Disease	1.98	0.0508	#NUM!	CCL20,CXCL3,CXCL8,IL1A,IL1B,TNF
Prostate Cancer Signaling	1.98	0.0508	#NUM!	GSTP1,HSP90AA1,NFKB1,NFKBIA,PTEN,REL
Xenobiotic Metabolism PXR Signaling Pathway	1.96	0.0415	-0.707	ALDH1A2,CHST11,GSTP1,HSP90AA1,MGST3,PRKCE,PRKCH,SCAND1
CSDE1 Signaling Pathway	1.95	0.0714	1	CCND3,HNRNPC,PTEN,SDC4
Molecular Mechanisms of Cancer	1.92	0.0308	#NUM!	BIRC3,CCND3,CFLAR,GNG2,HIF1A,HIPK2,ITGB2,NFKB1,NFKBIA,PMAIP1,PRKCE,PRKCH,REL,RHOH
Ferroptosis Signaling Pathway	1.87	0.0432	0.378	CTSB,FTL,GCH1,H2AZ1,MACROH2A1,NFE2L2,STAT3
Phagosome Maturation	1.83	0.0424	#NUM!	ATP6V0B,ATP6V0E1,ATP6V1F,ATP6V1G1,CTSB,DYNLL1,TUBA1A
Prolactin Signaling	1.8	0.0532	2	IRF1,KCNMA1,PRKCE,PRKCH,STAT3
Oxytocin Signaling Pathway	1.8	0.0345	1.897	CD36,CXCL8,GNG2,MYL6,NFE2L2,NFKB1,PRKCE,PRKCH,PTGS2,REL
Adrenomedullin signaling pathway	1.8	0.0386	1.89	ADM,HIF1A,IL1A,IL1B,IL1RN,NFKB1,REL,TNF
Renin-Angiotensin Signaling	1.79	0.0462	2	NFKB1,PRKCE,PRKCH,REL,STAT3,TNF
G-Protein Coupled Receptor Signaling	1.78	0.0266	2.065	ADGRE2,ADGRE5,CCRL2,DUSP1,DUSP6,FPR1,FPR2,GNG2,GPR132,GPR183,MYL6,NFAT5,NFKB1,NFKBIA,PDE4B,PRKCE,REL,STAT3,TULP2
Pentose Phosphate Pathway (Non-oxidative Branch)	1.77	0.154	#NUM!	TALDO1,TKT
Airway Inflammation in Asthma	1.77	0.0857	#NUM!	CCL20,CXCL8,IFNGR2
Glutathione Redox Reactions I	1.77	0.0857	#NUM!	GPX1,GSTP1,MGST3
NF-κB Signaling	1.76	0.0281	1	FCER1G,FLT1,IL1A,IL1B,IL1R2,IL1RN,INSR,IRAK3,MALT1,NFKB1,NFKBIA,PELI1,TLR4,TNF,TNFAIP3,TNIP1
Interferon Signaling	1.74	0.0833	#NUM!	IFNGR2,IRF1,PTPN2
Ribonucleotide Reductase Signaling Pathway	1.74	0.0407	-0.378	ACTB,EIF4E,HIF1A,NFKB1,STAT3,THBS1,YBX1
Activation of IRF by Cytosolic Pattern Recognition Receptors	1.73	0.0615	#NUM!	NFKB1,NFKBIA,REL,TNF
Cancer Drug Resistance By Drug Efflux	1.73	0.0615	#NUM!	NFKB1,PTEN,PTGS2,YBX1
Germ Cell-Sertoli Cell Junction Signaling	1.73	0.0405	#NUM!	ACTB,ACTG1,CFL1,LIMK2,RHOH,TNF,TUBA1A
HGF Signaling	1.72	0.0444	#NUM!	ETS2,ITGB2,PRKCE,PRKCH,PTGS2,STAT3
FXR/RXR Activation	1.69	0.0438	#NUM!	APOC1,APOE,IL1A,IL1B,IL1RN,TNF
Systemic Lupus Erythematosus In B Cell Signaling Pathway	1.69	0.026	2.828	CCND3,CXCL8,FCGR2A,HCK,IFNGR2,IL1A,IL1B,ISG20,MALT1,NFAT5,NFKB1,PAG1,PIK3AP1,PRKCE,PRKCH,REL,STAT3,TNF,TRAF1
Remodeling of Epithelial Adherens Junctions	1.67	0.0588	#NUM!	ACTB,ACTG1,ARPC2,TUBA1A
Gαq Signaling	1.67	0.0393	2.236	GNG2,NFKB1,NFKBIA,PRKCE,PRKCH,REL,RHOH
ERK/MAPK Signaling	1.67	0.0365	0.816	DUSP1,DUSP6,EIF4E,ETS2,ITGB2,PRKCE,STAT3,YWHAB
Tight Junction Signaling	1.65	0.0391	#NUM!	ACTB,ACTG1,MYL6,NFKB1,PTEN,REL,TNF
VEGF Signaling	1.62	0.0476	-1	ACTB,ACTG1,EIF1,FLT1,HIF1A
GM-CSF Signaling	1.61	0.0563	1	BCL2A1,HCK,RACK1,STAT3
Prostanoid Biosynthesis	1.6	0.125	#NUM!	PTGS2,TBXAS1
Xenobiotic Metabolism General Signaling Pathway	1.56	0.0408	0	FTL,GSTP1,MGST3,NFE2L2,PRKCE,PRKCH
Granzyme A Signaling	1.53	0.0533	1	IL1B,MT-ND3,NDUFA4,NDUFB10
D-myo-inositol (1,4,5,6)-Tetrakisphosphate Biosynthesis	1.53	0.0368	2.449	ATP1A1,DUSP1,DUSP6,PTEN,PTPN1,PTPN12,PTPN2
D-myo-inositol (3,4,5,6)-tetrakisphosphate Biosynthesis	1.53	0.0368	2.449	ATP1A1,DUSP1,DUSP6,PTEN,PTPN1,PTPN12,PTPN2
Synaptogenesis Signaling Pathway	1.52	0.031	0.632	AP2S1,APOE,ARPC2,CFL1,HCK,HSPA8,PRKCE,STXBP2,SYN1,THBS1
Hypoxia Signaling in the Cardiovascular System	1.51	0.0526	#NUM!	HIF1A,HSP90AA1,NFKBIA,PTEN
Macropinocytosis Signaling	1.51	0.0526	#NUM!	CD14,ITGB2,PRKCE,PRKCH
PTEN Signaling	1.5	0.0395	-1	FLT1,INSR,ITGB2,NFKB1,PTEN,REL
Semaphorin Neuronal Repulsive Signaling Pathway	1.5	0.0395	1.633	CD44,CFL1,ITGB2,LIMK2,MYL6,PDE4B
Angiopoietin Signaling	1.48	0.0513	#NUM!	NFKB1,NFKBIA,REL,TNIP1
cAMP-mediated signaling	1.47	0.0335	1.134	AKAP13,DUSP1,DUSP6,FPR1,FPR2,PDE4B,STAT3,TULP2
Role of RIG1-like Receptors in Antiviral Innate Immunity	1.46	0.0652	#NUM!	NFKB1,NFKBIA,REL
Coronavirus Replication Pathway	1.46	0.0652	#NUM!	COPE,IFITM10,TUBA1A
Antioxidant Action of Vitamin C	1.43	0.0424	#NUM!	NFKB1,NFKBIA,REL,SELENOT,TNF
Stearate Biosynthesis I (Animals)	1.43	0.0494	0	ACSL1,PPT1,SLC27A4,TBXAS1
PAK Signaling	1.42	0.042	#NUM!	CFL1,ITGB2,LIMK2,MYL6,TNF
3-phosphoinositide Degradation	1.41	0.0347	2.449	ATP1A1,DUSP1,DUSP6,PTEN,PTPN1,PTPN12,PTPN2
JAK/STAT Signaling	1.41	0.0488	#NUM!	NFKB1,PTPN1,REL,STAT3
Fatty Acid Activation	1.38	0.0952	#NUM!	ACSL1,SLC27A4
Sucrose Degradation V (Mammalian)	1.38	0.0952	#NUM!	ALDOA,TPI1
Insulin Secretion Signaling Pathway	1.38	0.0305	1	EIF1,EIF4E,HCK,INSR,PRKCE,PRKCH,SRP14,SSR4,STAT3
D-myo-inositol-5-phosphate Metabolism	1.37	0.034	2.449	ATP1A1,DUSP1,DUSP6,PTEN,PTPN1,PTPN12,PTPN2
Glutathione-mediated Detoxification	1.37	0.06	#NUM!	ANPEP,GSTP1,MGST3
Fc Epsilon RI Signaling	1.35	0.0403	1	FCER1G,LCP2,PRKCE,PRKCH,TNF
Relaxin Signaling	1.35	0.0364	#NUM!	GNG2,NFKB1,NFKBIA,PDE4B,REL,TULP2
Eicosanoid Signaling	1.35	0.0465	#NUM!	FPR2,LTA4H,PTGS2,TBXAS1
HIPPO signaling	1.33	0.046	2	CD44,SAV1,TP53BP2,YWHAB
Regulation Of The Epithelial Mesenchymal Transition In Development Pathway	1.33	0.046	#NUM!	HIF1A,NFKB1,REL,S100A4
UVB-Induced MAPK Signaling	1.33	0.0577	#NUM!	EIF4E,PRKCE,PRKCH
Breast Cancer Regulation by Stathmin1	1.32	0.0251	2.673	ADGRE2,ADGRE5,CCND3,CCRL2,FPR1,FPR2,GNG2,GPR132,GPR183,HIF1A,NFKB1,PRKCE,PRKCH,STAT3,TUBA1A
eNOS Signaling	1.31	0.0355	2	AQP9,FLT1,HSP90AA1,HSPA8,PRKCE,PRKCH
Pentose Phosphate Pathway	1.31	0.087	#NUM!	TALDO1,TKT
Mitochondrial L-carnitine Shuttle Pathway	1.31	0.087	#NUM!	ACSL1,SLC27A4
D-myo-inositol (1,3,4)-trisphosphate Biosynthesis	1.31	0.087	#NUM!	INPP5A,PTEN
Integrin Signaling	1.31	0.0329	-1.89	ACTB,ACTG1,ARPC2,ITGB2,PFN1,PTEN,RHOH
14-3-3-mediated Signaling	1.29	0.0388	1	PRKCE,PRKCH,TNF,TUBA1A,YWHAB
Unfolded protein response	1.29	0.0444	1	ATF6,HSPA8,NFE2L2,PPP1R15A
Androgen Signaling	1.28	0.0349	#NUM!	GNG2,HSP90AA1,NFKB1,PRKCE,PRKCH,REL
Tumoricidal Function of Hepatic Natural Killer Cells	1.27	0.0833	#NUM!	ICAM1,SERPINB9
Fatty Acid α-oxidation	1.27	0.0833	#NUM!	ALDH1A2,PTGS2
Apelin Adipocyte Signaling Pathway	1.27	0.044	-2	GPX1,GSTP1,HIF1A,MGST3
Superpathway of Inositol Phosphate Compounds	1.27	0.0304	1.89	ATP1A1,DUSP1,DUSP6,INPP5A,PTEN,PTPN1,PTPN12,PTPN2
RANK Signaling in Osteoclasts	1.26	0.0435	#NUM!	BIRC3,NFKB1,NFKBIA,REL
ERBB Signaling	1.24	0.043	2	AREG,EREG,PRKCE,PRKCH
CXCR4 Signaling	1.24	0.0341	1.633	EGR1,GNG2,MYL6,PRKCE,PRKCH,RHOH
CD27 Signaling in Lymphocytes	1.23	0.0526	#NUM!	NFKB1,NFKBIA,REL
Lymphotoxin β Receptor Signaling	1.23	0.0526	#NUM!	NFKB1,NFKBIA,TRAF1
3-phosphoinositide Biosynthesis	1.23	0.0315	2.449	ATP1A1,DUSP1,DUSP6,PTEN,PTPN1,PTPN12,PTPN2
Aldosterone Signaling in Epithelial Cells	1.22	0.0337	#NUM!	DUSP1,HSP90AA1,HSPA8,KCNMA1,PRKCE,PRKCH
Axonal Guidance Signaling	1.22	0.0252	#NUM!	ARPC2,CFL1,EIF4E,GNG2,ITGB2,LIMK2,MYL6,NFAT5,PFN1,PRKCE,PRKCH,SRGAP1,TUBA1A
Sperm Motility	1.21	0.0296	#NUM!	ABL2,FLT1,GNG2,HCK,INSR,PDE4B,PRKCE,PRKCH
γ-linolenate Biosynthesis II (Animals)	1.21	0.0769	#NUM!	ACSL1,SLC27A4
Leukotriene Biosynthesis	1.21	0.0769	#NUM!	LTA4H,MGST3
Th2 Pathway	1.2	0.0365	#NUM!	HLA-DQA2,ICAM1,IL2RA,ITGB2,NFKB1
FAT10 Signaling Pathway	1.19	0.0508	#NUM!	MAP1LC3B,PSMA7,TNF
CCR3 Signaling in Eosinophils	1.18	0.036	#NUM!	CFL1,GNG2,LIMK2,PRKCE,PRKCH
Colorectal Cancer Metastasis Signaling	1.17	0.029	2.646	GNG2,NFKB1,PTGS2,REL,RHOH,STAT3,TLR4,TNF
Semaphorin Signaling in Neurons	1.16	0.0492	#NUM!	CFL1,LIMK2,RHOH
Thrombin Signaling	1.16	0.0303	2	GNG2,MYL6,NFKB1,PRKCE,PRKCH,REL,RHOH
TEC Kinase Signaling	1.15	0.0241	1.265	ACTB,ACTG1,FCER1G,GNG2,HCK,ITGB2,NFKB1,PRKCE,PRKCH,REL,RHOH,STAT3,TLR4,TNF
P2Y Purigenic Receptor Signaling Pathway	1.14	0.035	2	GNG2,NFKB1,PRKCE,PRKCH,REL
Hereditary Breast Cancer Signaling	1.13	0.0347	#NUM!	ACTB,CCND3,GADD45B,PTEN,UBA52
Apelin Cardiomyocyte Signaling Pathway	1.1	0.0385	0	HIF1A,MYL6,PRKCE,PRKCH
Role Of Osteoblasts In Rheumatoid Arthritis Signaling Pathway	1.08	0.029	2.646	CTSB,CXCL8,IL1A,IL1B,PTGS2,STAT3,TNF
Superpathway of D-myo-inositol (1,4,5)-trisphosphate Metabolism	1.08	0.0645	#NUM!	INPP5A,PTEN
Dendritic Cell Maturation	1.07	0.0235	3.051	CD58,FCER1G,FCGR2A,HLA-DQA2,ICAM1,IL1A,IL1B,IL1RN,NFKB1,NFKBIA,REL,TLR4,TNF,TYROBP
Paxillin Signaling	1.07	0.0374	#NUM!	ACTB,ACTG1,ITGB2,PTPN12
Thrombopoietin Signaling	1.06	0.0448	#NUM!	PRKCE,PRKCH,STAT3
GNRH Signaling	1.06	0.0305	1.342	EGR1,GNG2,NFKB1,PRKCE,PRKCH,REL
Role of PI3K/AKT Signaling in the Pathogenesis of Influenza	1.05	0.0441	#NUM!	NFKB1,NFKBIA,REL
WNT/Ca+ pathway	1.03	0.0435	#NUM!	NFAT5,NFKB1,REL
Agrin Interactions at Neuromuscular Junction	1.02	0.0429	#NUM!	ACTB,ACTG1,GABPB1
Role of JAK2 in Hormone-like Cytokine Signaling	1.01	0.0588	#NUM!	PTPN1,STAT3
Ephrin Receptor Signaling	0.996	0.0293	0.447	ARPC2,CFL1,GNG2,ITGB2,LIMK2,STAT3
Epithelial Adherens Junction Signaling	0.979	0.0312	0.447	ARPC2,CFL1,LIMK2,PTEN,YWHAB
Glutamate Receptor Signaling	0.979	0.0411	#NUM!	GNG2,SLC1A2,SLC1A3
IL-13 Signaling Pathway	0.971	0.0345	1	CD36,DUSP1,HCK,STAT3
Ethanol Degradation IV	0.971	0.0556	#NUM!	ACSL1,ALDH1A2
Growth Hormone Signaling	0.955	0.04	#NUM!	PRKCE,PRKCH,STAT3
Pyridoxal 5'-phosphate Salvage Pathway	0.955	0.04	#NUM!	LIMK2,PRKCE,PRKCH
Sertoli Cell-Sertoli Cell Junction Signaling	0.928	0.028	#NUM!	ACTB,ACTG1,ITGB2,PTEN,TNF,TUBA1A
Inhibition of Angiogenesis by TSP1	0.91	0.0513	#NUM!	CD36,THBS1
VDR/RXR Activation	0.903	0.038	#NUM!	CD14,PRKCE,PRKCH
IL-3 Signaling	0.903	0.038	#NUM!	PRKCE,PRKCH,STAT3
Amyotrophic Lateral Sclerosis Signaling	0.883	0.032	0	BIRC3,GPX1,SLC1A2,SSR4
Thioredoxin Pathway	0.883	0.111	#NUM!	SELENOT
Renal Cell Carcinoma Signaling	0.879	0.037	#NUM!	ELOB,HIF1A,UBA52
Thyroid Cancer Signaling	0.879	0.037	#NUM!	CXCL8,INSR,PTEN
Th17 Activation Pathway	0.86	0.0226	1.897	CCL20,FCER1G,HIF1A,HSP90AA1,IL1B,IRAK2,IRAK3,NFAT5,NFKB1,REL,STAT3
Pancreatic Adenocarcinoma Signaling	0.857	0.0312	#NUM!	NFKB1,PTGS2,REL,STAT3
Chemokine Signaling	0.848	0.0357	#NUM!	CCL4,CFL1,LIMK2
Oncostatin M Signaling	0.842	0.0465	#NUM!	MT2A,STAT3
Glycolysis I	0.842	0.0465	#NUM!	ALDOA,TPI1
Protein Ubiquitination Pathway	0.842	0.0252	#NUM!	BIRC3,ELOB,HSP90AA1,HSPA8,PSMA7,UBA52,USP36
Superoxide Radicals Degradation	0.839	0.1	#NUM!	SOD2
Circadian Rhythm Signaling	0.827	0.0249	#NUM!	EIF4E,GNG2,HCK,HIF1A,PRKCE,PRKCH,RACK1
Docosahexaenoic Acid (DHA) Signaling	0.827	0.0455	#NUM!	BCL2A1,IL1B
Glioma Signaling	0.824	0.0303	#NUM!	CCND3,PRKCE,PRKCH,PTEN
GP6 Signaling Pathway	0.824	0.0303	1	FCER1G,LCP2,PRKCE,PRKCH
Nitric Oxide Signaling in the Cardiovascular System	0.815	0.0301	1	FLT1,HSP90AA1,PRKCE,PRKCH
Ethanol Degradation II	0.81	0.0444	#NUM!	ACSL1,ALDH1A2
Gα12/13 Signaling	0.807	0.0299	#NUM!	MYL6,NFKB1,NFKBIA,REL
Heme Degradation	0.801	0.0909	#NUM!	BLVRB
Tetrahydrobiopterin Biosynthesis I	0.801	0.0909	#NUM!	GCH1
Acetate Conversion to Acetyl-CoA	0.801	0.0909	#NUM!	ACSL1
Huntington's Disease Signaling	0.783	0.0242	1	GNG2,HSPA8,PRKCE,PRKCH,PSMA7,SDHD,UBA52
G Protein Signaling Mediated by Tubby	0.783	0.0426	#NUM!	GNG2,INSR
VEGF Family Ligand-Receptor Interactions	0.783	0.0333	#NUM!	FLT1,PRKCE,PRKCH
Regulation of Cellular Mechanics by Calpain Protease	0.783	0.0333	#NUM!	CCND3,EZR,ITGB2
Opioid Signaling Pathway	0.783	0.0242	1.134	AP2S1,GNG2,HCK,NFKB1,NFKBIA,PRKCE,PRKCH
Apelin Pancreas Signaling Pathway	0.783	0.0426	#NUM!	NFKB1,REL
TR/RXR Activation	0.775	0.033	#NUM!	HIF1A,KLF9,LDLR
GABA Receptor Signaling	0.775	0.029	#NUM!	AP2S1,GABARAP,GNG2,UBA52
Reelin Signaling in Neurons	0.767	0.0288	#NUM!	APOE,ARPC2,CFL1,HCK
Serine Biosynthesis	0.767	0.0833	#NUM!	UBAC2
Tetrahydrobiopterin Biosynthesis II	0.767	0.0833	#NUM!	GCH1
NAD Biosynthesis III	0.767	0.0833	#NUM!	NAMPT
Fatty Acid β-oxidation I	0.767	0.0417	#NUM!	ACSL1,SLC27A4
T Cell Receptor Signaling	0.764	0.0209	0	DUSP6,FCER1G,HLA-DQA2,ICAM1,ITGB2,LCP2,MALT1,NFAT5,NFKB1,NFKBIA,PAG1,REL,TNF
SNARE Signaling Pathway	0.759	0.0286	-2	HSPA8,MYL6,STXBP2,SYN1
Actin Nucleation by ARP-WASP Complex	0.754	0.0323	#NUM!	ARPC2,ITGB2,RHOH
p70S6K Signaling	0.752	0.0284	#NUM!	PRKCE,PRKCH,RPS6,YWHAB
Acute Myeloid Leukemia Signaling	0.745	0.0319	#NUM!	NFKB1,REL,STAT3
Regulation Of The Epithelial Mesenchymal Transition By Growth Factors Pathway	0.745	0.026	2	EGR1,NFKB1,REL,STAT3,TNF
Cell Cycle: G2/M DNA Damage Checkpoint Regulation	0.74	0.04	#NUM!	HIPK2,YWHAB
Gαi Signaling	0.738	0.028	2	FPR1,FPR2,GNG2,STAT3
Ceramide Signaling	0.735	0.0316	#NUM!	NFKB1,REL,TNF
Chondroitin and Dermatan Biosynthesis	0.735	0.0769	#NUM!	CSGALNACT2
Glycerol Degradation I	0.735	0.0769	#NUM!	GK
Tryptophan Degradation III (Eukaryotic)	0.726	0.0392	#NUM!	KYNU,TBXAS1
Regulation of the Epithelial-Mesenchymal Transition Pathway	0.726	0.0256	#NUM!	EGR1,HIF1A,NFKB1,REL,STAT3
UVC-Induced MAPK Signaling	0.726	0.0392	#NUM!	PRKCE,PRKCH
nNOS Signaling in Neurons	0.714	0.0385	#NUM!	PRKCE,PRKCH
Insulin Receptor Signaling	0.714	0.0274	0	EIF4E,INSR,PTEN,PTPN1
tRNA Splicing	0.701	0.0377	#NUM!	PDE4B,TULP2
B Cell Receptor Signaling	0.701	0.0203	1.508	BCL2A1,BCL6,CFL1,EGR1,FCGR2A,MALT1,NFAT5,NFKB1,NFKBIA,PAG1,PIK3AP1,PTEN,REL
Sphingomyelin Metabolism	0.68	0.0667	#NUM!	SGMS2
Dilated Cardiomyopathy Signaling Pathway	0.674	0.0263	#NUM!	ACTB,ACTG1,MYL6,PRKCE
Acyl-CoA Hydrolysis	0.654	0.0625	#NUM!	PPT1
Tryptophan Degradation to 2-amino-3-carboxymuconate Semialdehyde	0.654	0.0625	#NUM!	KYNU
Chronic Myeloid Leukemia Signaling	0.635	0.028	#NUM!	CCND3,NFKB1,REL
Gap Junction Signaling	0.635	0.0237	#NUM!	ACTB,ACTG1,PRKCE,PRKCH,TUBA1A
Chondroitin Sulfate Biosynthesis (Late Stages)	0.633	0.0339	#NUM!	CHST11,CSGALNACT2
Superpathway of Serine and Glycine Biosynthesis I	0.631	0.0588	#NUM!	UBAC2
Telomerase Signaling	0.627	0.0278	#NUM!	ETS2,HSP90AA1,IL2RA
Altered T Cell and B Cell Signaling in Rheumatoid Arthritis	0.618	0.0202	#NUM!	FCER1G,HLA-DQA2,IL1A,IL1B,IL1RN,NFKB1,REL,SLAMF1,TLR4,TNF
Inhibition of ARE-Mediated mRNA Degradation Pathway	0.611	0.0247	#NUM!	PSMA7,TNF,YWHAB,ZFP36
Cellular Effects of Sildenafil (Viagra)	0.606	0.0245	#NUM!	ACTB,ACTG1,MYL6,PDE4B
Kinetochore Metaphase Signaling Pathway	0.606	0.027	#NUM!	ENSA,H2AZ1,MACROH2A1
CREB Signaling in Neurons	0.604	0.0195	3.317	ADGRE2,ADGRE5,CCRL2,FLT1,FPR1,FPR2,GNG2,GPR132,GPR183,INSR,PRKCE,PRKCH
Retinoic acid Mediated Apoptosis Signaling	0.592	0.0317	#NUM!	CFLAR,IRF1
RAN Signaling	0.59	0.0526	#NUM!	RANBP2
Salvage Pathways of Pyrimidine Ribonucleotides	0.583	0.0263	#NUM!	LIMK2,PRKCE,PRKCH
ERB2-ERBB3 Signaling	0.572	0.0308	#NUM!	PTEN,STAT3
NAD Signaling Pathway	0.565	0.0235	1	HIF1A,NAMPT,NFKB1,SOD2
α-Adrenergic Signaling	0.556	0.0254	#NUM!	GNG2,PRKCE,PRKCH
Mitotic Roles of Polo-Like Kinase	0.554	0.0299	#NUM!	HSP90AA1,PLK3
D-myo-inositol (1,4,5)-trisphosphate Degradation	0.553	0.0476	#NUM!	INPP5A
Endoplasmic Reticulum Stress Pathway	0.553	0.0476	#NUM!	ATF6
Cell Cycle: G1/S Checkpoint Regulation	0.545	0.0294	#NUM!	CCND3,RPL11
Role of JAK1 and JAK3 in γc Cytokine Signaling	0.536	0.029	#NUM!	IL2RA,STAT3
Oxidative Ethanol Degradation III	0.536	0.029	#NUM!	ACSL1,ALDH1A2
SPINK1 General Cancer Pathway	0.536	0.029	#NUM!	MT2A,STAT3
PXR/RXR Activation	0.527	0.0286	#NUM!	INSR,TNF
ERBB4 Signaling	0.527	0.0286	#NUM!	PRKCE,PRKCH
GPCR-Mediated Nutrient Sensing in Enteroendocrine Cells	0.513	0.024	#NUM!	GNG2,PRKCE,PRKCH
IL-22 Signaling	0.504	0.0417	#NUM!	STAT3
Glioma Invasiveness Signaling	0.495	0.027	#NUM!	CD44,RHOH
Ephrin B Signaling	0.495	0.027	#NUM!	CFL1,GNG2
Chondroitin Sulfate Biosynthesis	0.495	0.027	#NUM!	CHST11,CSGALNACT2
Role of JAK family kinases in IL-6-type Cytokine Signaling	0.489	0.04	#NUM!	STAT3
1D-myo-inositol Hexakisphosphate Biosynthesis II (Mammalian)	0.489	0.04	#NUM!	INPP5A
Gαs Signaling	0.489	0.0233	#NUM!	GNG2,HCK,RAPGEF2
Dermatan Sulfate Biosynthesis	0.488	0.0267	#NUM!	CHST11,CSGALNACT2
γ-glutamyl Cycle	0.475	0.0385	#NUM!	ANPEP
Cardiac β-adrenergic Signaling	0.475	0.0213	#NUM!	AKAP13,GNG2,PDE4B,TULP2
Melatonin Signaling	0.466	0.0256	#NUM!	PRKCE,PRKCH
Apelin Liver Signaling Pathway	0.462	0.037	#NUM!	TNF
Neurovascular Coupling Signaling Pathway	0.451	0.0198	2.236	KCNJ2,KCNMA1,PTGS2,SLC1A2,SLC1A3
IL-7 Signaling Pathway	0.451	0.025	#NUM!	BCL6,CCND3
FLT3 Signaling in Hematopoietic Progenitor Cells	0.438	0.0244	#NUM!	EIF4E,STAT3
G Beta Gamma Signaling	0.435	0.0216	#NUM!	GNG2,PRKCE,PRKCH
Glutaryl-CoA Degradation	0.426	0.0333	#NUM!	TBXAS1
Estrogen-Dependent Breast Cancer Signaling	0.419	0.0235	#NUM!	NFKB1,REL
Role of MAPK Signaling in the Pathogenesis of Influenza	0.419	0.0235	#NUM!	PTGS2,TNF
Phospholipase C Signaling	0.413	0.0174	2.333	FCER1G,FCGR2A,GNG2,ITGB2,LCP2,MYL6,NFAT5,NFKB1,PRKCE,PRKCH,REL,RHOH
Type I Diabetes Mellitus Signaling	0.402	0.0176	1.89	FCER1G,HLA-DQA2,IFNGR2,IL1B,IRF1,NFKB1,NFKBIA,REL,TNF
BMP signaling pathway	0.4	0.0227	#NUM!	NFKB1,REL
ICOS-ICOSL Signaling in T Helper Cells	0.397	0.0176	1.342	FCER1G,HLA-DQA2,IL2RA,LCP2,NFAT5,NFKB1,NFKBIA,PTEN,REL
Endothelin-1 Signaling	0.396	0.0193	#NUM!	ECE1,PRKCE,PRKCH,PTGS2
NAD biosynthesis II (from tryptophan)	0.394	0.0303	#NUM!	KYNU
Vitamin-C Transport	0.394	0.0303	#NUM!	SELENOT
Heparan Sulfate Biosynthesis (Late Stages)	0.388	0.0222	#NUM!	CHST11,TNFAIP6
Putrescine Degradation III	0.384	0.0294	#NUM!	ALDH1A2
PDGF Signaling	0.377	0.0217	#NUM!	ABL2,STAT3
Histamine Degradation	0.375	0.0286	#NUM!	ALDH1A2
CD28 Signaling in T Helper Cells	0.374	0.0172	0.447	ARPC2,FCER1G,HLA-DQA2,LCP2,MALT1,NFAT5,NFKB1,NFKBIA,REL
CDP-diacylglycerol Biosynthesis I	0.366	0.0278	#NUM!	GPAT3
IL-4 Signaling	0.361	0.0211	#NUM!	HLA-DQA2,NFAT5
Tryptophan Degradation X (Mammalian, via Tryptamine)	0.357	0.027	#NUM!	ALDH1A2
Cell Cycle Regulation by BTG Family Proteins	0.348	0.0263	#NUM!	BTG2
Ovarian Cancer Signaling	0.343	0.0187	#NUM!	CD44,PTEN,PTGS2
FAK Signaling	0.342	0.0163	1.698	ADGRE2,ADGRE5,ARPC2,CCRL2,ETS2,FCER1G,FLT1,FPR1,FPR2,GPR132,GPR183,IL1R2,IL2RA,ITGB2,NFKB1,PTEN,PTPN12
Antigen Presentation Pathway	0.34	0.0256	#NUM!	HLA-DQA2
Corticotropin Releasing Hormone Signaling	0.339	0.0186	#NUM!	PRKCE,PRKCH,PTGS2
ATM Signaling	0.335	0.02	#NUM!	GADD45B,NFKBIA
Heparan Sulfate Biosynthesis	0.331	0.0198	#NUM!	CHST11,TNFAIP6
TCA Cycle II (Eukaryotic)	0.324	0.0244	#NUM!	SDHD
Phosphatidylglycerol Biosynthesis II (Non-plastidic)	0.317	0.0238	#NUM!	GPAT3
Neuropathic Pain Signaling In Dorsal Horn Neurons	0.312	0.019	#NUM!	PRKCE,PRKCH
IGF-1 Signaling	0.308	0.0189	#NUM!	STAT3,YWHAB
Role of OCT4 in Mammalian Embryonic Stem Cell Pluripotency	0.289	0.0217	#NUM!	ETS2
B Cell Development	0.289	0.0217	#NUM!	HLA-DQA2
Retinoate Biosynthesis I	0.289	0.0217	#NUM!	ALDH1A2
Dopamine Degradation	0.289	0.0217	#NUM!	ALDH1A2
Glioblastoma Multiforme Signaling	0.287	0.017	#NUM!	CCND3,PTEN,RHOH
Gluconeogenesis I	0.277	0.0208	#NUM!	ALDOA
Ephrin A Signaling	0.271	0.0204	#NUM!	CFL1
Bladder Cancer Signaling	0.268	0.0172	#NUM!	CXCL8,THBS1
Apelin Muscle Signaling Pathway	0.26	0.0196	#NUM!	GNG2
Melanoma Signaling	0.254	0.0192	#NUM!	PTEN
Dermatan Sulfate Biosynthesis (Late Stages)	0.254	0.0192	#NUM!	CHST11
Amyloid Processing	0.254	0.0192	#NUM!	PRKCE
DNA Methylation and Transcriptional Repression Signaling	0.249	0.0165	#NUM!	GADD45B,TET2
Spliceosomal Cycle	0.249	0.0189	#NUM!	HSPA8
Transcriptional Regulatory Network in Embryonic Stem Cells	0.243	0.0185	#NUM!	STAT3
Noradrenaline and Adrenaline Degradation	0.243	0.0185	#NUM!	ALDH1A2
Serotonin Receptor Signaling	0.238	0.0182	#NUM!	GCH1
NGF Signaling	0.233	0.0159	#NUM!	NFKB1,REL
Neuroprotective Role of THOP1 in Alzheimer's Disease	0.23	0.0157	#NUM!	CFD,ECE1
CNTF Signaling	0.228	0.0175	#NUM!	STAT3
Endocannabinoid Developing Neuron Pathway	0.226	0.0156	#NUM!	GNG2,STAT3
EGF Signaling	0.22	0.0169	#NUM!	STAT3
PCP (Planar Cell Polarity) Pathway	0.215	0.0167	#NUM!	PFN1
SPINK1 Pancreatic Cancer Pathway	0.215	0.0167	#NUM!	CTSB
Endometrial Cancer Signaling	0.206	0.0161	#NUM!	PTEN
IL-2 Signaling	0.202	0.0159	#NUM!	IL2RA
Triacylglycerol Biosynthesis	0.199	0.0156	#NUM!	GPAT3
PFKFB4 Signaling Pathway	0.199	0.0156	#NUM!	TKT
MicroRNA Biogenesis Signaling Pathway	0	0.0101	#NUM!	HSP90AA1,HSPA8
Synaptic Long Term Potentiation	0	0.0144	#NUM!	PRKCE,PRKCH
Synaptic Long Term Depression	0	0.00976	#NUM!	PRKCE,PRKCH
Role of BRCA1 in DNA Damage Response	0	0.0125	#NUM!	ACTB
Role of NFAT in Regulation of the Immune Response	0	0.0151	1.342	FCER1G,FCGR2A,GNG2,HLA-DQA2,LCP2,NFAT5,NFKB1,NFKBIA,REL
CCR5 Signaling in Macrophages	0	0.0119	1	CCL3,CCL4,FCER1G,GNG2,PRKCE,PRKCH
Calcium-induced T Lymphocyte Apoptosis	0	0.00862	#NUM!	FCER1G,HLA-DQA2,PRKCE,PRKCH
Cytotoxic T Lymphocyte-mediated Apoptosis of Target Cells	0	0.00235	#NUM!	FCER1G
CTLA4 Signaling in Cytotoxic T Lymphocytes	0	0.0147	-1.667	AP2S1,FCER1G,HCK,HLA-DQA2,ITGB2,LCP2,MALT1,NFAT5,NFKB1
T Helper Cell Differentiation	0	0.0148	#NUM!	BCL6,FCER1G,HLA-DQA2,IFNGR2,IL2RA,STAT3,TNF
IL-15 Signaling	0	0.00756	#NUM!	CXCL8,NFKB1,REL,STAT3
Factors Promoting Cardiogenesis in Vertebrates	0	0.0131	#NUM!	PRKCE,PRKCH
Cardiac Hypertrophy Signaling	0	0.0148	1	EIF4E,GNG2,MYL6,RHOH
CDK5 Signaling	0	0.0084	#NUM!	EGR1
Lipid Antigen Presentation by CD1	0	0.00482	#NUM!	AP2S1,FCER1G
Polyamine Regulation in Colon Cancer	0	0.0149	#NUM!	OAZ1
Human Embryonic Stem Cell Pluripotency	0	0.00585	#NUM!	GNG2
Antiproliferative Role of Somatostatin Receptor 2	0	0.0123	#NUM!	GNG2
Role of NANOG in Mammalian Embryonic Stem Cell Pluripotency	0	0.00833	#NUM!	STAT3
Allograft Rejection Signaling	0	0.00613	#NUM!	FCER1G,HLA-DQA2,TNF
Autoimmune Thyroid Disease Signaling	0	0.00435	#NUM!	FCER1G,HLA-DQA2
Graft-versus-Host Disease Signaling	0	0.0134	#NUM!	FCER1G,HLA-DQA2,IL1A,IL1B,IL1RN,TNF
Non-Small Cell Lung Cancer Signaling	0	0.01	#NUM!	CCND3
ERK5 Signaling	0	0.0133	#NUM!	YWHAB
Communication between Innate and Adaptive Immune Cells	0	0.0107	#NUM!	CCL3,CCL3L3,CCL4,CXCL8,FCER1G,IL1A,IL1B,IL1RN,TLR4,TNF
Sphingosine-1-phosphate Signaling	0	0.00806	#NUM!	RHOH
Systemic Lupus Erythematosus Signaling	0	0.0126	#NUM!	FCER1G,FCGR2A,HNRNPC,IL1A,IL1B,IL1RN,NFAT5,TNF
CDC42 Signaling	0	0.0121	-1.342	ARPC2,CFL1,FCER1G,HLA-DQA2,ITGB2,LIMK2,MYL6
AMPK Signaling	0	0.0155	#NUM!	ACTB,GNG2,INSR,PFKFB3
Leptin Signaling in Obesity	0	0.0125	#NUM!	STAT3
Role of NFAT in Cardiac Hypertrophy	0	0.0131	#NUM!	GNG2,PRKCE,PRKCH
Regulation of IL-2 Expression in Activated and Anergic T Lymphocytes	0	0.0129	0.816	FCER1G,MALT1,NFAT5,NFKB1,NFKBIA,REL
NUR77 Signaling in T Lymphocytes	0	0.00777	#NUM!	FCER1G,HLA-DQA2,PRKCE,PRKCH
PKCθ Signaling in T Lymphocytes	0	0.0142	0.816	FCER1G,HLA-DQA2,LCP2,MALT1,NFAT5,NFKB1,NFKBIA,REL
Antiproliferative Role of TOB in T Cell Signaling	0	0.00235	#NUM!	FCER1G
OX40 Signaling Pathway	0	0.0104	#NUM!	FCER1G,HLA-DQA2,NFKB1,NFKBIA,REL
Cyclins and Cell Cycle Regulation	0	0.0118	#NUM!	CCND3
Dopamine-DARPP32 Feedback in cAMP Signaling	0	0.0151	#NUM!	KCNJ2,PRKCE,PRKCH
Mouse Embryonic Stem Cell Pluripotency	0	0.00962	#NUM!	STAT3
Hematopoiesis from Pluripotent Stem Cells	0	0.00674	#NUM!	CXCL8,FCER1G,IL1A
Netrin Signaling	0	0.013	#NUM!	NFAT5
Triacylglycerol Degradation	0	0.0154	#NUM!	TNFAIP6
Serotonin Degradation	0	0.0114	#NUM!	ALDH1A2
Adipogenesis pathway	0	0.0147	#NUM!	HIF1A,TNF
SAPK/JNK Signaling	0	0.00596	#NUM!	FCER1G,GNG2,MAP4K3
FGF Signaling	0	0.0111	#NUM!	STAT3
WNT/β-catenin Signaling	0	0.0114	#NUM!	CD44,UBA52
Dopamine Receptor Signaling	0	0.0106	#NUM!	GCH1
Gustation Pathway	0	0.00448	#NUM!	CD36
NER (Nucleotide Excision Repair, Enhanced Pathway)	0	0.00926	#NUM!	POLE4
Endocannabinoid Neuronal Synapse Pathway	0	0.0123	#NUM!	GNG2,PTGS2
Endocannabinoid Cancer Inhibition Pathway	0	0.013	#NUM!	CCND3,HIF1A
T Cell Exhaustion Signaling Pathway	0	0.00876	0	BCL6,FCER1G,HLA-DQA2,NFAT5,STAT3
Systemic Lupus Erythematosus In T Cell Signaling Pathway	0	0.0108	1.134	BCL6,CD44,EZR,FCER1G,HLA-DQA2,RHOH,STAT3
White Adipose Tissue Browning Pathway	0	0.00658	#NUM!	FCER1G
Calcium Signaling	0	0.00881	#NUM!	MYL6,NFAT5
