# Supplementary material for: Single-Cell Sequencing of Lung Macrophages and Monocytes Reveals Novel Therapeutic Targets in COPD
Source: Cells. 2023 Dec 5;12(24):2771. doi: 10.3390/cells12242771 (PMC10741950; doi:10.3390/cells12242771)
Supplement: Supplementary file 1 [file cells-12-02771-s001.zip › Table S3_ All fluticasone - Upstream regulators lfc 0.5 (bio chem drugs)-FINAL.xlsx]

## Sheet: 15 vs 11
© 2000-2022 QIAGEN. All rights reserved.
Upstream Regulator	Expr Log Ratio	Molecule Type	Predicted Activation State	Activation z-score	p-value of overlap	Target Molecules in Dataset	Mechanistic Network
lipopolysaccharide		chemical drug	Activated	5.975	1.68e-54	ACSL1,ACTB,ADGRE2,ADM,AIF1,AKAP13,ALDH1A2,ALDOA,APOC1,APOE,AREG,ARL4C,ATP1A1,BCL2A1,BCL6,BIRC3,C1QC,CAPG,CCL20,CCL3,CCL3L3,CCL4,CCND3,CCRL2,CD14,CD36,CD44,CD55,CD58,CD63,CD9,CFD,CFLAR,CH25H,CLIC4,COX4I1,CST3,CSTB,CTSB,CXCL2,CXCL3,CXCL8,CYBA,DUSP1,EGR1,EHD1,ELL2,EREG,ETS2,FABP5,FCER1G,FLT1,FNDC3A,FPR1,FPR2,GABARAP,GADD45B,GBP2,GCH1,GK,GMFG,GPR183,GPX1,GSTP1,HCK,HIF1A,HIPK2,HSP90AA1,HSPA8,ICAM1,IFN…	228 (14)
acyline		biologic drug			2.86e-33	BCL6,DUSP1,EEF1B2,EGR1,GADD45B,LDLR,RPL10A,RPL12,RPL13,RPL15,RPL18A,RPL27,RPL27A,RPL28,RPL3,RPL30,RPL35A,RPL7,RPL8,RPS13,RPS15,RPS18,RPS19,RPS2,RPS20,RPS23,RPS25,RPS26,RPS4Y1,RPS5,RPS6,RPS9,ZBTB16
poly rI:rC-RNA		biologic drug	Activated	5.851	2.88e-32	ATP5MG,BIRC3,CCL20,CCL3,CCL3L3,CCL4,CCND3,CD14,CD36,CD44,CFLAR,CXCL2,CXCL3,CXCL8,DUSP1,EEF1G,EGR1,EREG,EZR,FCN1,FPR1,GADD45B,GBP2,GCH1,HIF1A,ICAM1,IL1A,IL1B,IL2RA,IRAK2,IRF1,ISG20,KLF6,KYNU,LTA4H,MIR155HG,NAMPT,NFKB1,NFKBIA,NFKBIZ,NLRP3,PMAIP1,PPP1R15A,PTGS2,PTPN2,REL,RPL10A,RPL11,RPL12,RPL15,RPL19,RPL3,RPL30,RPS13,RPS2,SDC4,SLAMF1,SOD2,TET2,THBS1,TLR4,TNF,TNFAIP3,TNFAIP6,TNIP3,TRAF1,ZFP36	170 (11)
sirolimus		chemical drug	Activated	3.067	1.21e-31	ACTB,ADM,ARHGDIB,ATP1A1,ATP5MG,ATP6V0B,ATP6V1G1,BCL2A1,CCL20,CCL3L3,CCND3,CD36,CFD,CFLAR,COX6A1,COX6B1,EGR1,FPR1,GSTP1,HIF1A,HSP90AA1,ICAM1,IL1B,IL2RA,INSR,MAP1LC3B,NFKB1,NLRP3,OAZ1,PTMA,RACK1,RPL10A,RPL13,RPL15,RPL18,RPL18A,RPL19,RPL27,RPL27A,RPL29,RPL3,RPL30,RPL41,RPL7A,RPL8,RPS13,RPS14,RPS15,RPS18,RPS19,RPS2,RPS20,RPS23,RPS26,RPS3,RPS4Y1,RPS5,RPS6,RPS9,S100A4,SLC1A2,SLC27A4,TNF,TPI1,UBA52,VMP1…	251 (24)
resiquimod		chemical drug	Activated	3.7	9.82e-31	AIF1,ATF6,BCL2A1,CCL20,CCL3,CCL3L3,CCL4,CCL4L1/CCL4L2,CCRL2,CD44,CXCL2,CXCL3,CXCL8,ETS2,FCER1G,FCGR2A,GNG2,GPX1,HCK,ICAM1,IL1A,IL1B,IL2RA,IRAK2,IRAK3,ISG20,KCNMA1,NAMPT,NFE2L2,NFKB1,NFKBIA,NFKBIZ,NLRP3,PMAIP1,PTGS2,PYCARD,REL,RPS6,SOD2,TLR4,TNF,TNFAIP3,TNIP1,TNIP3,YWHAB	143 (16)
dexamethasone		chemical drug		0.471	5.02e-30	ACSL1,ACTB,ACTG1,ADM,AIF1,AKAP13,ANPEP,APOE,AREG,ARL4C,ATP1A1,BCL2A1,BCL6,BIRC3,BLVRB,BTG2,C1QB,CCL20,CCL3,CCL3L3,CCL4,CCND3,CD36,CD44,CD55,CFD,CFL1,CFLAR,CLIC4,COX4I1,CRYBG1,CST3,CTSB,CXCL2,CXCL3,CXCL8,DDAH2,DUSP1,EGR1,EIF4E,EREG,ETS2,EZR,FABP5,FCER1G,FGD4,FKBP5,FPR2,FTL,GADD45B,GBP2,GPR183,GPX1,GRN,GSTP1,HIF1A,HIPK2,HSPA8,ICAM1,IFNGR2,IL1A,IL1B,IL1R2,IL1RN,IL2RA,INSR,IRAK3,IRF1,ISG20,KLF6,KLF9,…	216 (15)
tetradecanoylphorbol acetate		chemical drug	Activated	4.718	1.44e-27	ACTB,ADM,AREG,BCL2A1,BIRC3,BTG2,CAPG,CCL20,CCL3,CCL3L3,CCL4,CCND3,CD14,CD36,CD44,CD55,CFLAR,CH25H,CTSB,CXCL2,CXCL3,CXCL8,CYBA,DUSP1,DUSP6,ECE1,EDF1,EGR1,EIF4E,ETS2,EZR,FCER1G,FKBP5,FLT1,GADD45B,GSTP1,HIF1A,HNRNPC,ICAM1,IFNGR2,IL1A,IL1B,IL1RN,IL2RA,IRAK3,IRF1,ITGB2,KLF6,LDLR,MEFV,MT2A,NFAT5,NFKB1,NFKBIA,NLRP3,PPP1R15A,PRKCE,PRKCH,PTEN,PTGS2,PTPN1,RACK1,REL,RHOH,RPL19,S100A8,S100A9,SDC4,SERPINB9,SL…	196 (14)
5-fluorouracil		chemical drug	Activated	4.597	4.98e-26	ALDOA,BTG2,CFLAR,COX6A1,COX6B1,CSTB,EEF1G,EGR1,EIF1,ELOB,GPR132,HNRNPC,HSPA8,IL1A,IL1B,MT-ND3,NACA,NDUFA4,OAZ1,PLK3,PPP1R15A,PSMA7,PTGS2,RNF19B,RPL10A,RPL11,RPL15,RPL18,RPL19,RPL27A,RPL30,RPL35A,RPL7,RPL7A,RPS13,RPS23,RPS4Y1,SLC25A6,SSR4,SUB1,THBS1,TLR4,TMSB10/TMSB4X,TPI1,YBX1	90 (4)
ST1926		chemical drug	Activated	4.849	2.04e-24	ACTB,AP2S1,ARPC2,CFL1,COX5B,COX7C,DYNLL1,FKBP5,H2AZ1,HSP90AA1,LGALS1,NACA,NOP10,PFN1,RPL13,RPL18A,RPL19,RPL29,RPL36AL,RPL41,RPL8,RPLP1,RPS15,RPS2,RPS26,SLC25A6,TMSB10/TMSB4X,UBA52,UQCRB,VAMP8,YBX1
camptothecin		chemical drug		1.757	1.95e-23	ALDOA,APOE,AREG,BCL2A1,BIRC3,BTG2,CCL20,CCL3,CCRL2,CFLAR,CHST11,CRYBG1,CXCL2,CXCL3,CXCL8,DUSP6,EEF1B2,FLT1,FNDC3A,FPR1,GADD45B,GBP2,HIF1A,HSP90AA1,HSPA8,ICAM1,IL1A,IL1B,IL2RA,IRF1,LDLR,LDLRAD4,LITAF,MAFF,NFKB1,NFKBIA,NLRP3,OSTF1,PMAIP1,PTEN,PTGS2,PTPN1,PYCARD,RPL3,SDC4,SERPINB9,SFTPC,SIPA1L1,SOD2,STX11,TNF,TNFAIP3,TNFAIP6,TRAF1	200 (16)
LY294002		chemical drug	Inhibited	-3.515	2.36e-20	ANPEP,APOE,BCL6,BIRC3,CCL20,CCND3,CD14,CD36,CD44,CFLAR,CST3,CXCL2,CXCL3,CXCL8,DUSP1,DUSP6,EGR1,EREG,ETS2,FLT1,GK,GPR183,GRN,GSTP1,HIF1A,ICAM1,IL1A,IL1B,IL1R2,IL1RN,INSR,IRF1,ISG20,MT2A,NFE2L2,NFKBIA,PDE4B,PMAIP1,PTEN,PTGS2,PTPN1,PTPN2,THBS1,TNF,TNFAIP3,ZBTB16,ZFP36	232 (21)
SB203580		chemical drug	Inhibited	-4.839	8.36e-20	AQP9,AREG,ARHGDIB,ATF6,CCL20,CCL3,CCL4,CCRL2,CD55,CXCL2,CXCL3,CXCL8,DUSP1,EGR1,EREG,ETS2,FLT1,FPR2,GBP2,GK,GSTP1,HIF1A,ICAM1,IL1A,IL1B,IL1RN,IL2RA,IRF1,ISG20,NAMPT,NFKB1,NFKBIA,PDE4B,PPP1R15A,PTGS2,REL,SERPINB9,SGMS2,SOD2,THBS1,TLR4,TNF,TNFAIP6,TRAF1	168 (13)
interferon beta-1a		biologic drug			2.33e-19	ATP5MG,COX5B,COX6A1,EEF1G,FCER1G,FPR1,GADD45B,GSTP1,IL1RN,IRF1,LGALS1,NFKBIA,PFDN5,RPL18,RPL19,RPL27,RPL27A,RPL3,RPL36AL,RPS19,S100A9,SLC25A6,TBXAS1,TNFAIP6
CD 437		chemical drug	Activated	4.154	4e-19	ALDOA,AP2S1,ARHGDIB,ARPC2,ATP5MG,COX7C,FKBP5,FTL,HNRNPC,HSP90AA1,HSPA8,LGALS1,NACA,NFKBIA,NOP10,PFN1,RPL11,RPL13,RPL19,RPL36AL,RPL8,RPLP1,RPS15,RPS2,SLC25A6,TMSB10/TMSB4X,TUBA1A,UBA52,YBX1
methylprednisolone		chemical drug		-0.106	9.87e-19	ACSL1,ANPEP,ATP1A1,C1QB,CCL3,CCL4,CD36,CD44,CD9,COX6A1,CST3,CXCL3,DUSP1,DUSP6,DYNLL1,ECE1,FABP5,FCGR2A,GBP2,GCH1,GSTP1,IL1A,IL1B,IL1RN,IRAK3,IRF1,KLF9,LDLR,MAP1LC3B,NFE2L2,NFKB1,NFKBIA,PIK3AP1,PNRC1,PTPN1,REL,SDC4,SERPINB9,STAT3,TLR4,TMSB10/TMSB4X,TNF,TNFAIP3,TNIP1,TNIP3,VMP1,WDR74,ZFP36	200 (18)
filgrastim		biologic drug		1.889	3.25e-17	ACSL1,ATP1A1,BIRC3,BTG2,CCL3,CCL3L3,CCL4,CCND3,CD44,CD55,CRYBG1,CST3,CXCL8,DDAH2,ETS2,FABP5,FCER1G,FKBP5,GPR183,HIPK2,IL1R2,IRAK3,KLF6,KLF9,LDLR,LILRA5,MAFF,NLRP3,PDE4B,PFKFB3,PMAIP1,PTGS2,S100A4,SAMSN1,SLC1A3,ST6GALNAC3,SULF2,TLR4
N-acetyl-L-cysteine		chemical drug		-1.686	3.64e-16	ADM,ATP1A1,BACH1,BCL2A1,BIRC3,CCL20,CD36,CFLAR,CXCL3,CXCL8,CYBA,DUSP1,DUSP6,EGR1,GSTP1,HIF1A,ICAM1,IL1A,IL1B,IL2RA,MAP1LC3B,NFE2L2,NFKBIA,NFKBIZ,NLRP3,PTGS2,PYCARD,SOD2,TLR4,TNF	203 (17)
fluticasone propionate		chemical drug	Activated	2.534	6.85e-16	ADM,AQP9,C1QB,CCL20,CCL4L1/CCL4L2,CD36,CXCL2,CXCL8,FCN1,FKBP5,GADD45B,IL1A,IL1B,IL1R2,IL1RN,KLF9,MT2A,NAMPT,S100A8,SDC4,SLAMF1,SLC1A3,THBS1,TPST1	214 (15)
laminaran		chemical drug	Activated	3.729	8.98e-16	CCL20,CCL4,CCL4L1/CCL4L2,CXCL8,EREG,GCH1,IL1A,IL1B,IL2RA,MT2A,PTGS2,TNFAIP6,TNIP3,TRAF1	107 (14)
prexasertib		chemical drug	Activated	4.077	9.69e-16	ADM,BCL6,BIRC3,BTG2,DUSP1,EGR1,GADD45B,ICAM1,IL1B,NFKBIA,PMAIP1,PPP1R15A,PTGS2,TNF,TNFAIP3,TRAF1,ZFP36	207 (21)
wortmannin		chemical drug		-0.09	1.15e-15	ANPEP,CCL4,CCND3,CD14,CD36,CD44,CFLAR,CXCL8,EGR1,EZR,GSTP1,HIF1A,ICAM1,IL1B,IL2RA,INSR,IRF1,MAP1LC3B,MT2A,NFE2L2,NFKB1,NFKBIA,PTEN,PTGS2,SAMSN1,TNF,TPI1	189 (21)
trichostatin A		chemical drug	Inhibited	-2.562	1.38e-15	ACTB,APOE,AREG,BCL2A1,BLVRB,CCL20,CCL3,CD14,CD36,CD44,CD58,CD9,CFLAR,CTSB,CXCL2,CXCL3,CXCL8,DUSP1,EHD1,EIF4E,EREG,EZR,FLT1,FTL,GSTP1,HIF1A,ICAM1,IL1A,IL1B,IL2RA,IRF1,LDLR,LGALS1,MAP1LC3B,MBNL1,MGST3,MNDA,NFE2L2,NFKBIA,PMAIP1,PTEN,PTGS2,RAPGEF2,REL,RPL13,SELENOT,SLC1A2,SOD2,STAT3,TALDO1,THBS1,TKT,TLR4,TMSB10/TMSB4X,TNF	249 (22)
topotecan		chemical drug	Inhibited	-2.092	3.46e-15	ACSL1,ACTB,AIF1,BCL2A1,BIRC3,CCL4,CD14,CFLAR,CSMD1,CXCL3,EGR1,GADD45B,GCH1,GPX1,HIF1A,HSPA8,ICAM1,IL1A,IL1B,IL1RAPL1,IRF1,KCNMA1,MALT1,NFKBIA,PDE4B,PLK3,PMAIP1,PTGS2,TNF,TNFAIP3,YBX1,ZFP36	198 (23)
cyclosporin A		biologic drug	Inhibited	-2.907	4.54e-15	APOE,ATP1A1,BIRC3,CCL4,CD14,CD44,CD55,CFLAR,CXCL8,CYBA,EGR1,ELL2,FCGR2A,FKBP5,FLT1,FXYD5,HIF1A,HSP90AA1,ICAM1,IL1A,IL1B,IL2RA,LDLR,NFAT5,NFKB1,NFKBIA,PRKCH,PTEN,PTGS2,REL,S100A11,S100A9,SLAMF1,SRP14,SSR4,TMSB10/TMSB4X,TNF	188 (16)
entolimod		biologic drug	Activated	2.969	5.68e-15	BCL2A1,CCL4,CXCL2,CXCL3,DUSP1,IL1A,IL1B,IRF1,NFKBIA,NFKBIZ,TNF,TNFAIP3	100 (10)
concanavalin a		chemical drug	Activated	3.069	9.27e-15	BCL2A1,CCL3,CCL3L3,CCL4,CFLAR,CXCL2,CXCL8,EGR1,GSTP1,HIF1A,ICAM1,IL1B,IL1RN,IL2RA,IRF1,ITGB2,LGALS1,NFAT5,PTGS2,SDC4,TNF	116 (13)
trovafloxacin		chemical drug	Activated	3.011	1.18e-14	BIRC3,CXCL2,CXCL3,ETS2,ICAM1,IRF1,ISG20,LDLR,NFKBIA,PDE4B,PTEN,PTPN2,SOD2,STAT3,THBS1,TNFAIP3	188 (14)
SP600125		chemical drug	Inhibited	-3.25	1.66e-14	ADM,APOE,AREG,ATF6,BTG2,CCL20,CCL3,CCL4,CD44,CXCL2,CXCL3,CXCL8,DUSP1,EGR1,FABP5,GBP2,ICAM1,IL1A,IL1B,IL1RN,IL2RA,LDLR,MAP1LC3B,NFKBIA,PTGS2,SOD2,THBS1,TLR4,TNF,TNFAIP3,ZFP36	171 (13)
U0126		chemical drug	Inhibited	-3.446	1.79e-14	AREG,BIRC3,CCL3,CCL3L3,CCL4,CCND3,CD36,CD44,CFLAR,CXCL2,CXCL3,CXCL8,DUSP1,DUSP6,EGR1,EREG,FKBP5,GADD45B,GRN,HIF1A,ICAM1,IL1A,IL1B,IL1R2,IRF1,KDM6B,LDLR,NFE2L2,PTGS2,PTPN12,RPS6,S100A9,SFTPC,SOD2,STAT3,THBS1,TNF,TRAF1,YBX1,ZFP36	201 (19)
prednisolone		chemical drug		1.358	8.37e-14	APOE,BIRC3,CFLAR,CTSB,DUSP1,FKBP5,GABARAP,GABPB1,GK,HIF1A,HSP90AA1,HSPA8,IL1B,INSR,ISG20,KLF9,LDLRAD4,LIMK2,MAP1LC3B,NFKB1,PTEN,PTGS2,SOD2,TNF,TNFAIP3,ZBTB16	198 (18)
doxorubicin		chemical drug	Activated	2.188	1.42e-13	ADM,AREG,BCL2A1,BIRC3,BTG2,CD14,CD44,CFLAR,CTSB,CXCL2,CXCL3,CXCL8,DUSP1,EEF1B2,EGR1,GPR132,HIF1A,HIPK2,HSP90AA1,IL1B,IRF1,MT-ND3,NFE2L2,NFKB1,NFKBIA,NLRP3,PMAIP1,PTEN,PTGS2,S100A11,S100A8,S100A9,SOD2,STAT3,TLR4,TNF,TP53BP2,YBX1	136 (13)
CFI-402257		chemical drug	Activated	2.091	2.08e-13	AREG,CCL20,CD55,CXCL2,CXCL3,CXCL8,EREG,GMFG,ICAM1,IL1A,IL1B,S100A9	143 (16)
arsenic trioxide		chemical drug		1.22	2.92e-13	ATF6,ATP6V0B,ATP6V1F,BACH1,BCL2A1,BLVRB,CD44,CFLAR,COX5B,COX6B1,COX7C,CST3,CXCL8,HIF1A,HSPA8,IRF1,MT2A,NDUFA4,NFE2L2,NFKBIA,PTEN,PTGS2,S100A8,SDHD,SLC25A6,STAT3,TNF,TNFAIP3,UQCR10	175 (19)
triamcinolone acetonide		chemical drug	Activated	2.07	3.89e-13	ACSL1,AKAP13,ARL4C,BCL2A1,BTG2,CAPG,CD44,CRYBG1,DUSP1,EGR1,FKBP5,HCK,HIPK2,KLF9,LDLR,MT2A,NFKBIA,RAPGEF2,SLAMF1,SOD2,TNFAIP8,ZBTB16,ZFAND5	148 (18)
mycophenolic acid		chemical drug	Activated	2.034	4.68e-13	ADM,ANPEP,BIRC3,CCL20,CCND3,CD55,CD63,CSGALNACT2,CXCL3,CXCL8,DUSP1,IL1B,LDLR,PTGS2,SOD2,TNFAIP3	200 (21)
paclitaxel		chemical drug	Activated	2.049	6.91e-13	ADM,AREG,BIRC3,BTG2,CD44,CFLAR,CXCL2,CXCL8,DUSP6,EGR1,EREG,GADD45B,GPR132,HIF1A,ICAM1,IL1B,KDM6B,LCP2,NFKBIA,PTGS2,PTPN12,S100A9,SOD2,STAT3,THBS1,TNF,TRAF1,YBX1	188 (18)
calcitriol		chemical drug		1.208	1.64e-12	ACSL1,ALDH1A2,AREG,BACH1,CCL20,CCND3,CD14,CD44,CFD,CXCL2,CXCL3,CXCL8,DUSP1,EGR1,EIF1,FTL,H2AZ1,HIF1A,HIPK2,IL1A,IL1B,IL1RN,IL2RA,LGALS1,NDUFA4,NFKB1,NFKBIA,PIK3AP1,PTEN,PTGS2,REL,S100A8,S100A9,SERPINB9,SLC25A6,STAT3,THBS1,TLR4,TNF,TNFAIP3,TSPO	161 (18)
cisplatin		chemical drug	Activated	2.467	2.02e-12	ACTB,ANPEP,BCL2A1,BIRC3,BTG2,CD14,CD44,CFLAR,CTSB,CXCL3,CXCL8,DUSP1,DUSP6,ECE1,EGR1,FCGR2A,FLT1,FXYD5,GSTP1,HIF1A,HIPK2,ICAM1,IL1A,IL1B,MAP1LC3B,MT2A,NAMPT,NFKBIA,PLK3,PMAIP1,PTEN,PTGS2,RNF144B,RPS5,RPS9,S100A11,S100A8,S100A9,STAT3,SULF2,THBS1,TLR4,TMSB10/TMSB4X,TNF,TNFAIP3,TNFAIP8,YBX1	212 (20)
decitabine		chemical drug		0.275	2.27e-12	ADGRE2,ALDH1A2,APOE,ARHGDIB,ARPC2,BIRC3,CCND3,CD44,CD55,CD58,CD9,CFLAR,CXCL3,DUSP1,EEF1B2,EEF1G,EHD1,EIF4E,EZR,GADD45B,GPX1,GSTP1,ICAM1,IL1B,KLF6,LDLR,LGALS1,MGST3,NFKBIA,PKP2,PTEN,PTGS2,RAPGEF2,REL,RPL11,RPL4,RPS13,RPS25,RPS6,SFTPC,SLC1A2,STAT3,THBS1,TMSB10/TMSB4X,TNF,TP53BP2	220 (21)
CpG oligonucleotide		chemical drug	Activated	3.401	2.5e-12	BCL2A1,CCL3L3,CCL4,CD14,CD36,CD58,CD63,CXCL2,CXCL8,DUSP1,EGR1,ETS2,ICAM1,IL1B,IL2RA,NFKBIZ,PTGS2,SAMSN1,SOD2,THBS1,TNF	166 (16)
caffeic acid phenethyl ester		chemical drug	Inhibited	-2.848	2.77e-12	BIRC3,CD44,CTSB,CXCL3,CXCL8,EGR1,FTL,ICAM1,IL1B,KLF6,NFE2L2,NFKB1,NFKBIA,PTGS2,S100A6,STAT3,TNF	186 (18)
resveratrol		chemical drug	Inhibited	-2.125	2.91e-12	AIF1,BCL2A1,BIRC3,CCL3,CCL3L3,CD14,CD36,CFLAR,COX4I1,CXCL2,CXCL3,CXCL8,DYNLL1,ECE1,EGR1,GPX1,HIF1A,ICAM1,IL1B,IL2RA,LDLR,LITAF,NFKBIA,PPP1R15A,PTGS2,SOD2,TNF,TNFAIP6	149 (15)
genistein		chemical drug	Inhibited	-2.073	3.03e-12	ADM,ATP6V0B,ATP6V1G1,CD44,CFD,CFLAR,CTSB,CXCL2,CXCL3,CXCL8,DUSP1,EREG,FXYD5,GABARAP,GPX1,HIF1A,ICAM1,IL1B,ITGB2,KCNJ2,LCP2,LDLR,NFE2L2,NFKB1,NPC2,PLK3,PPT1,PTEN,PTGS2,SOD2,TNF	204 (19)
deferoxamine		chemical drug		1.282	3.23e-12	ADM,ALDOA,BACH1,CCL20,CCL3L3,CCL4,CCND3,CD14,CFLAR,CXCL8,DUSP1,FLT1,GADD45B,GAS7,HIF1A,ICAM1,ISG20,ITGB2,MAP1LC3B,NFKB1,PFKFB3,PMAIP1,SULF2	210 (23)
semaxinib		chemical drug		1.592	1.13e-11	AIF1,ALDOA,C1QB,C1QC,CCL20,CCL3L3,CXCL2,CXCL3,EGR1,EREG,HIF1A,IL1B,IL1R2,NFE2L2,NFKBIA,NLRP3,PTGS2,THBS1	207 (19)
cerivastatin		chemical drug		-0.181	1.86e-11	CCL3,CD36,CXCL8,DBI,GCH1,GPX1,ICAM1,INSR,ITGB2,PTGS2,PTMA,S100A8,S100A9,TMSB10/TMSB4X,TNF	217 (22)
simvastatin		chemical drug		-1.47	2.3e-11	APOE,CCL20,CCL3,CD14,CD55,CD9,CFLAR,CXCL2,CXCL3,CXCL8,ICAM1,IL1B,IRF1,ITGB2,LDLR,MAP1LC3B,NFKBIA,PTGS2,S100A6,SDC4,SOD2,TLR4,TNF	143 (13)
imiquimod		chemical drug	Activated	2.238	3e-11	BTG2,CCL3,CCL3L3,CCL4,CXCL2,CXCL3,CXCL8,HCK,ICAM1,IL1A,IL1B,IL1RN,IL2RA,ISG20,ITGB2,PELI1,PTGS2,RPS6,S100A8,S100A9,SOD2,TNF	127 (15)
tributyrin		chemical drug	Activated	3.569	3.47e-11	ADM,BCL2A1,BIRC3,CCL20,CD55,CSGALNACT2,CXCL3,CXCL8,DUSP1,IL1B,PTGS2,SOD2,TNFAIP3	126 (11)
curcumin		chemical drug	Inhibited	-3.018	4.15e-11	APOE,BIRC3,CCND3,CD36,CD44,CFLAR,CXCL3,CXCL8,EGR1,EIF4E,ELOB,FTL,GSTP1,HIF1A,HSPA8,ICAM1,IL1B,KLF9,NAMPT,NFE2L2,NFKB1,NFKBIA,PTEN,PTGS2,STAT3,SYN1,TLR4,TNF,TRAF1	164 (20)
budesonide		chemical drug		-0.269	4.18e-11	ACTG1,AREG,CCL3L3,CXCL2,CXCL8,DYNLL1,EREG,HIF1A,IL1RN,KLF9,LCP2,LIMK2,NAMPT,OSTF1,PELI1,PFKFB3,RASGEF1B,S100A9,SAMSN1,SNX9,SRGAP1,TNF,TNFAIP6,TP53BP2,ZFAND5	196 (19)
indomethacin		chemical drug		-0.378	4.21e-11	ACSL1,ATP6V0B,BIRC3,BTG2,CCL3L3,CD14,CD44,CD55,DYNLL1,FCGR2A,FLT1,FXYD5,HIF1A,ICAM1,IL1A,IL1B,INSR,LDLR,PTGS2,S100A11,S100A8,TMSB10/TMSB4X,TNF,UQCR10	203 (20)
rosiglitazone		chemical drug	Inhibited	-2.442	8.11e-11	ACSL1,APOC1,APOE,ATP1A1,C1QB,C1QC,CCL3L3,CCRL2,CD36,CFD,COX4I1,CXCL8,FABP5,GBP2,GK,GPAT3,ICAM1,IL1A,IL1B,IL1RN,INSR,IRF1,PTEN,PTGS2,PTPN1,S100A8,S100A9,SLC27A4,SOD2,THBS1,TLR4,TNF	206 (25)
bryostatin 1		chemical drug	Activated	2.406	9.04e-11	AREG,BIRC3,CCL3,CD44,CXCL8,ICAM1,IFNGR2,IL1B,TNF,TRAF1	193 (15)
actinomycin D		biologic drug		-1.257	1.28e-10	ACTB,ADM,ATP1A1,BCL2A1,BIRC3,CD55,CFLAR,CXCL8,DUSP1,FPR1,GCH1,GSTP1,HIF1A,IL1R2,IRF1,PFKFB3,PMAIP1,PTGS2,SCGB3A1,TNF,TP53BP2,TRAF1	228 (16)
acetaminophen		chemical drug		1.641	1.87e-10	ACTB,ACTG1,BLVRB,BTG2,CCL3L3,CXCL2,CXCL3,FLT1,FTL,GPX1,GSTP1,HIF1A,ICAM1,IL1A,IL1B,NFE2L2,PTGS2,PTPN1,TALDO1,TKT,TNF,TUBA1A	203 (20)
nitrofurantoin		chemical drug		-0.471	2e-10	ACTB,ACTG1,APOE,BTG2,CCL3L3,CST3,CTSB,CXCL3,DBI,EIF4E,GSTP1,IL1B,NFKBIA,RPL13,RPL27,RPS9,S100A11,TUBA1A
carrageenan		chemical drug	Activated	2.942	2.02e-10	CCL3L3,CXCL2,CXCL3,CXCL8,EGR1,ICAM1,IL1B,NFKB1,NFKBIA,PTGS2,RPS6,TNF	131 (13)
nicotine		chemical drug		0.016	2.52e-10	ALDOA,CCL3,CCL4,CD44,CFLAR,CXCL3,CXCL8,DBI,EGR1,GCH1,HIF1A,HSPA8,ICAM1,IL1A,IL1B,LDLR,LITAF,NFKB1,PTGS2,STAT3,TNF,ZFP36	192 (17)
etoposide		chemical drug	Activated	3.095	4.35e-10	BCL2A1,BIRC3,CCL3,CFLAR,CXCL2,CXCL3,CXCL8,DUSP1,EEF1B2,GPR132,HIF1A,ICAM1,IL1A,IL1B,IRF1,REL,RNF144B,SOD2,TNF,TNFAIP3	140 (12)
vancomycin		biologic drug		-0.139	4.35e-10	BACH1,BIRC3,C1QB,CD14,CD44,CD63,CD9,CST3,CTSB,CXCL2,EEF1G,FCGR2A,FXYD5,IL1B,LGALS1,S100A11,SOD2,STAT3,TMSB10/TMSB4X,TNF	153 (11)
rabeprazole		chemical drug	Inhibited	-2.438	4.37e-10	CCL3L3,CXCL3,FLT1,ICAM1,IL1B,TNF
epigallocatechin-gallate		chemical drug	Inhibited	-2.668	7.4e-10	CCL3L3,CFLAR,CXCL3,CXCL8,EGR1,GADD45B,HIF1A,ICAM1,IL1A,IL1B,IRF1,LDLR,NFE2L2,NFKBIA,PRKCE,PTGS2,REL,STAT3,TLR4,TNF,TRAF1	203 (17)
methotrexate		chemical drug		-1.571	1.31e-09	ACTB,ACTG1,ALDOA,BTG2,C1QB,CCL3,CCL4,CXCL8,DUSP1,FPR1,FPR2,ICAM1,IL1A,IL1B,INSR,OSTF1,PTGS2,S100A11,SFTPC,THBS1,TNF	179 (18)
glucocorticoid		chemical drug		-0.437	1.77e-09	CCL3,CCND3,CD44,CXCL2,CXCL8,DUSP1,FNDC3A,GCH1,GRN,ICAM1,IL1A,IL1B,IL1R2,IL1RN,IL2RA,INSR,MT2A,NFKBIA,PTGS2,SCGB1A1,STX11,TNF,ZBTB16	127 (13)
Ro31-8220		chemical drug	Inhibited	-2.606	4.58e-09	CCL20,CD55,CXCL8,DUSP1,EGR1,HIF1A,ICAM1,IL1B,PTGS2,TRAF1	217 (21)
tanespimycin		chemical drug		-1.484	4.69e-09	BCL2A1,BIRC3,CFLAR,CXCL8,HNRNPC,HSPA8,PSMA7,PTMA,RPL27A,RPL30,SLC1A2,SOD2,STAT3,SYN1,TNFAIP3	188 (17)
AGN194204		chemical drug		1.974	4.75e-09	ARL4C,ATP1A1,BCL2A1,CCL3L3,CCL4,CLIC4,CRYBG1,CST3,DENND5A,DUSP1,GBP2,H2AZ1,IL1R2,IL2RA,IRF1,ITGB2,KLF6,LGALS1,NPC2
ebselen		chemical drug		-1.937	6.9e-09	DUSP1,HIF1A,ICAM1,IL1B,PTGS2,TLR4,TNF	196 (22)
ruxolitinib		chemical drug		-1.136	7.12e-09	CD44,COX4I1,COX6B1,IL1B,MAP1LC3B,MT-ND3,NAMPT,NLRP3,PTGS2,PYCARD,SLAMF1,STAT3	124 (13)
mifepristone		chemical drug		-0.485	8.96e-09	ADM,APOE,AREG,C1QB,CD14,CYBA,DUSP1,EGR1,FKBP5,ICAM1,IL1B,LDLR,NFE2L2,NFKBIA,NPL,PELI1,PFKFB3,PTGS2,S100A6,SLC1A2,STXBP2,TNF,TNFAIP6	208 (24)
erlotinib		chemical drug		1.211	9.07e-09	AREG,CCL20,CD14,CD36,CXCL3,CXCL8,EGR1,ICAM1,IL1A,IL1B,NFKBIA,PTEN,TLR4,TNF	167 (17)
bisindolylmaleimide I		chemical drug	Inhibited	-3.115	1.01e-08	BCL2A1,BIRC3,CD44,CD55,CXCL8,EGR1,ICAM1,NFKBIA,PRKCE,PTGS2,SAMSN1,SOD2,TNF,TRAF1	215 (17)
thalidomide		chemical drug	Inhibited	-2.922	1.38e-08	BIRC3,CFLAR,CXCL8,GADD45B,ICAM1,IL1B,KCNMA1,TNF,TRAF1	125 (19)
infliximab		biologic drug	Inhibited	-3.293	1.41e-08	CCL20,CXCL8,FCGR2A,IL1B,IL2RA,NAMPT,NFKBIA,PTGS2,SLAMF1,TNF,TRAF1	171 (22)
Go 6976		chemical drug	Inhibited	-3.263	1.41e-08	CCL4,CD55,CXCL2,CXCL3,CXCL8,FLT1,NFKBIA,PTGS2,SOD2,TNF,TRAF1	175 (14)
romidepsin		biologic drug		0.244	1.42e-08	BCL2A1,CFLAR,CXCL8,DUSP1,DUSP6,EGR1,HIF1A,ICAM1,INSR,PTGS2,SLC1A2,TNFAIP6	156 (16)
bortezomib		chemical drug		-0.307	1.62e-08	BCL2A1,BIRC3,CCL4,CFLAR,CXCL2,CXCL8,GADD45B,HIF1A,HSP90AA1,ICAM1,IL1B,IL2RA,KLF9,NFKB1,PMAIP1,PPP1R15A,PSMA7,PTGS2,TNF,TP53BP2	174 (18)
bardoxolone methyl		chemical drug	Inhibited	-2.778	1.71e-08	BIRC3,CCL3L3,CCL4,CFLAR,IL1B,PTGS2,TNF,TRAF1	171 (18)
gefitinib		chemical drug		-0.895	1.95e-08	AREG,BTG2,CFLAR,CTSB,CXCL2,CXCL8,EHD1,FLT1,GADD45B,HIF1A,IL1B,IL1R2,MAFF,PTGS2,S100A9,TNF,TRAF1	198 (22)
lisinopril		biologic drug		-1.556	2.17e-08	ARHGDIB,GBP2,IL1B,ITGB2,LDLR,S100A6,S100A8,S100A9,TNF	180 (14)
PF-562271		chemical drug	Inhibited	-2.646	2.42e-08	CCL3L3,CCL4,GBP2,IL1A,IL1B,NFKB1,TNF	172 (16)
H89		chemical drug	Inhibited	-2.249	2.85e-08	AREG,CCL3,CD14,CD55,CXCL8,DUSP1,EGR1,EREG,GSTP1,IL1B,NFKBIA,PTGS2,S100A8,SOD2,TNF,TNFAIP6	211 (27)
phytohemagglutinin		chemical drug	Activated	3.622	3.17e-08	AIF1,CCL3,CCL4,CCND3,CD44,CXCL8,EGR1,HSP90AA1,ICAM1,IFNGR2,IL1B,IL1R2,IL2RA,NFKB1,PTPN1,PTPN12,SRP14,STAT3,TNF,TRAF1,ZFX	215 (18)
resatorvid		chemical drug		-1.5	3.31e-08	ALDOA,CCL20,CXCL3,CXCL8,IL1B,NLRP3,PTGS2,TLR4,TNF	134 (16)
corticosteroid		chemical drug		-0.128	3.42e-08	ARL4C,CST3,CXCL8,DUSP1,FKBP5,HIPK2,IL1R2,IL1RN,MAFF,SSR4,TNF	143 (18)
cis-urocanic acid		chemical drug	Activated	2.621	3.5e-08	CD55,CXCL8,GADD45B,PMAIP1,PTGS2,TNF,TNFAIP3	108 (8)
salicylic acid		chemical drug	Inhibited	-2.092	4.23e-08	CCL3,CCL4,CFLAR,CXCL8,FKBP5,IL1A,IL1B,PTGS2,TLR4,TNF	191 (19)
belnacasan		chemical drug	Inhibited	-2.433	4.32e-08	CCL3L3,CXCL3,IL1B,MEFV,NLRP3,TNF	130 (13)
losartan potassium		chemical drug		-1.541	5.62e-08	ARHGDIB,ATP1A1,CD36,CST3,CXCL3,CXCL8,EGR1,GBP2,IL1B,ITGB2,PTGS2,S100A8,S100A9,STAT3,TNF	192 (20)
4-hydroxytamoxifen		chemical drug		1.846	5.72e-08	AREG,CD55,DUSP1,DYNLL1,EGR1,H2AZ1,MT2A,NFKBIA,PMAIP1,PPP1R15A,PRKCH,S100A9,SERPINB9,TNF,TNFAIP3,ZFP36	157 (17)
hydroxyurea		chemical drug	Activated	2.891	6.97e-08	CCL3,CCND3,CXCL2,CXCL3,CXCL8,GPR132,GPX1,IL1A,ISG20,TNF,TNFAIP3,TRAF1	133 (15)
herbimycin		chemical drug	Inhibited	-2.413	7.25e-08	CCND3,CXCL8,DUSP1,ICAM1,IL1B,IL2RA,PTGS2,SOD2,TNF	171 (17)
vorinostat		chemical drug		-1.329	7.45e-08	BIRC3,CCL3L3,CFLAR,CXCL8,DUSP1,EGR1,GRN,ICAM1,IL1A,IL1B,IRF1,LDLR,NFKBIA,PMAIP1,PTGS2,S100A8,S100A9,SLC1A2,TNF,TRAF1	216 (18)
estrogen		chemical drug		0.593	7.45e-08	APOE,AREG,DUSP1,EGR1,FLT1,HIF1A,ICAM1,IL1A,IL1B,LDLR,LGALS1,NAMPT,PTEN,PTGS2,PTMA,SCGB1A1,SERPINB9,STAT3,TNF,ZFP36	171 (19)
N-nitro-L-arginine methyl ester		chemical drug		0.126	7.53e-08	ADM,CXCL2,CXCL3,CXCL8,CYBA,HIF1A,ICAM1,IL1B,LDLR,NFKBIA,PTGS2,TLR4,TNF	191 (19)
sulforafan		chemical drug		-1.146	8.87e-08	CD44,CXCL8,FTL,GABARAP,GABPB1,GPX1,GSTP1,HIF1A,HIPK2,ICAM1,IL1B,MACROH2A1,NFE2L2,NFKBIA,PTGS2,SULF2,TALDO1,TKT,TNF	152 (19)
troglitazone		chemical drug	Inhibited	-3.209	8.97e-08	ACSL1,BIRC3,CCL3,CCND3,CD36,CFD,CFL1,CFLAR,CXCL3,CXCL8,DBI,EGR1,FABP5,GBP2,HIPK2,ICAM1,IL1B,NFKB1,NFKBIA,PTEN,PTGS2,TALDO1,TBXAS1,TNF	204 (18)
MLN120B		chemical drug	Inhibited	-2.619	9.47e-08	CTSB,CXCL2,CXCL8,ICAM1,IL1B,PTGS2,TNF	132 (17)
cyclophosphamide		chemical drug	Activated	2.209	1.08e-07	CD44,CXCL2,CXCL3,FCGR2A,ICAM1,IL1B,IL1R2,LGALS1,PTGS2,S100A11,THBS1,TNF	197 (20)
diclofenac		chemical drug		1.416	1.34e-07	AREG,ATF6,BACH1,HIF1A,IL1A,IL2RA,KLF9,MAP1LC3B,PPP1R15A,PTGS2,SOD2,TNF	193 (21)
calphostin C		chemical drug	Inhibited	-2.325	1.64e-07	CD36,CXCL8,DUSP1,ECE1,ICAM1,LDLR,PTGS2,S100A8,SOD2,TNF	200 (23)
tyrphostin AG490		chemical drug	Inhibited	-2.818	1.65e-07	BIRC3,CCND3,CXCL2,CXCL8,HIF1A,ICAM1,IL1B,IRF1,PTGS2,SOD2,STAT3,TNF	199 (22)
parthenolide		chemical drug		-1.809	1.95e-07	CXCL2,CXCL3,CXCL8,IL1B,NFE2L2,PTGS2,SOD2,TNF	151 (19)
sorafenib		chemical drug	Inhibited	-2.02	3.31e-07	CCL3,CCND3,CFLAR,CXCL8,HIF1A,IL1B,IL2RA,PPP1R15A,TNF	187 (21)
PS-1145		chemical drug	Inhibited	-2.401	3.65e-07	CXCL8,ICAM1,IRF1,NFKBIA,PTGS2,TNFAIP3	150 (20)
tacrolimus		chemical drug	Inhibited	-2.461	3.66e-07	AREG,CAPG,CCL4,CD36,CXCL2,CXCL8,EGR1,ELL2,FKBP5,IL1B,IL1R2,IL2RA,NFAT5,NFKBIA,PTGS2,SLAMF1,SOD2,TNF	126 (14)
medroxyprogesterone acetate		chemical drug		-1.39	4.11e-07	ACTG1,BIRC3,BTG2,CCL3,CCL4,CD44,CFD,CTSB,EZR,GCH1,HIF1A,ICAM1,IL1A,IL1B,IL2RA,ITGB2,NFKBIA,PMAIP1,PPT1,S100A11,STAT3,THBS1,TMSB10/TMSB4X,TNF,ZBTB16	226 (20)
methapyrilene		chemical drug		-0.632	4.19e-07	ACTG1,ALDOA,APOE,BTG2,CD36,CST3,CTSB,CXCL3,DBI,KYNU,RPL27,RPS9,SERP1
vinpocetine		chemical drug	Inhibited	-2.19	4.34e-07	CXCL3,CXCL8,ICAM1,IL1B,TNF	115 (15)
gentamicin		chemical drug		1.632	4.52e-07	BACH1,BTG2,C1QB,CD63,CD9,CST3,CTSB,EGR1,FXYD5,HSP90AA1,ICAM1,IL1B,IRF1,KLF6,KYNU,LGALS1,LITAF,PTPN1,ST6GALNAC3,STAT3,TNF	182 (12)
adavosertib		chemical drug	Activated	3.275	4.88e-07	ADGRE2,CCL20,CXCL8,ICAM1,IL1A,IRAK2,IRF1,ISG20,THBS1,TNF,TNFAIP3	191 (19)
atorvastatin		chemical drug		1.57	4.91e-07	APOE,CD36,CD55,CXCL8,CYBA,DUSP1,EGR1,FLT1,GADD45B,ICAM1,IL2RA,INSR,ITGB2,LDLR,PTGS2,TLR4,ZFP36	224 (22)
Sb202190		chemical drug		-1.578	4.94e-07	CCL3,CCND3,CD55,CXCL8,EGR1,FPR2,HIF1A,ICAM1,IL1B,LDLR,PTGS2,S100A8,TNF	196 (19)
BAY 61-3606		chemical drug		-0.94	5.14e-07	AIF1,CXCL2,IL1B,NLRP3,PYCARD,TNF	148 (16)
dalfampridine		chemical drug	Activated	2.343	5.17e-07	BTG2,DUSP1,DUSP6,EGR1,GADD45B,HSPA8,MAFF,PFKFB3,PTGS2	191 (20)
hydroxypropyl-beta-cyclodextrin		chemical drug	Inhibited	-3.162	6e-07	APOE,CCL3L3,CD44,CTSB,IL1A,IL1B,LDLR,NPC2,STAT3,TLR4,TNF	170 (17)
PLX5622		chemical drug		1.873	6.32e-07	ACTB,AIF1,C1QC,CCL20,CCL3L3,CCL4,CD14,CD9,GRN,IL1A,IL1B,IL1RN,NAMPT,TLR4,TNF
bexarotene		chemical drug		-1.93	6.74e-07	ALDH1A2,APOE,CFD,COX6A1,CST3,DUSP1,EIF1,ICAM1,IL1B,IL2RA,MAFF,PNRC1,PTGS2,S100A9,VAMP8	196 (23)
nitroprusside		chemical drug		0.896	6.86e-07	ADM,CFLAR,CXCL3,DUSP6,EGR1,FLT1,IFNGR2,PTGS2,TNF	216 (22)
TAS4464		chemical drug		1.572	7.54e-07	BCL2A1,BCL6,CFLAR,EGR1,KLF6,PMAIP1,TNF	176 (7)
pinaverium		chemical drug		-1.982	9.39e-07	CXCL2,ICAM1,IL1B,TNF
roflumilast		chemical drug		-0.18	9.39e-07	CXCL2,IL1B,PDE4B,TNF	137 (16)
grepafloxacin		chemical drug		-1.98	9.39e-07	CXCL8,IL1A,IL1B,TNF	92 (7)
salinosporamide A		chemical drug		-1.633	9.64e-07	BIRC3,CFLAR,HIF1A,ICAM1,PTGS2,TRAF1	120 (10)
triptolide		chemical drug	Inhibited	-2.928	1.16e-06	ADM,CXCL8,DUSP1,FLT1,ICAM1,IL1A,NFE2L2,NFKB1,PMAIP1,PTGS2,SERPINB9,TLR4,TNF	196 (22)
mitomycin C		chemical drug		1.813	1.17e-06	ATF6,BTG2,CXCL8,EGR1,PMAIP1,PPP1R15A,PRKCE,PYCARD,VMP1	179 (15)
SRT1720		chemical drug		-1.109	1.18e-06	CXCL8,HIF1A,IL1B,TNF,TNFAIP6	201 (22)
cyclomaltodextrin		chemical drug	Inhibited	-2.219	1.18e-06	CCL3L3,CXCL3,IL1B,S100A8,TNF	116 (13)
rottlerin		chemical drug	Inhibited	-2.908	1.3e-06	BIRC3,CCND3,CXCL3,CXCL8,ECE1,FKBP5,ICAM1,PTGS2,TNF,ZFP36	181 (20)
bezafibrate		chemical drug		-0.425	1.3e-06	ACSL1,ALDH1A2,APOE,CD36,COX4I1,DBI,ICAM1,NPC2,PTGS2,TNF,TSPO	199 (20)
trans-hydroxytamoxifen		chemical drug		-1.457	1.49e-06	ADM,APOE,AREG,CXCL8,CYBA,DUSP1,EGR1,GSTP1,HIF1A,KLF6,KYNU,LITAF,PTEN,SERPINB9	191 (13)
zoledronic acid		chemical drug		0.6	1.61e-06	CXCL8,FLT1,IL1B,IL2RA,IRAK3,PTGS2,TLR4,TNF	149 (15)
propofol		chemical drug		-0.059	1.61e-06	CD14,EGR1,IL1B,SOD2,THBS1,TLR4,TNF,ZFP36	204 (24)
vitamin K3		chemical drug		0.659	1.72e-06	CCL20,CFLAR,EGR1,IL1A,KLF6,MAP1LC3B,NAMPT	189 (19)
PP2/AG1879 tyrosine kinase inhibitor		chemical drug		-1.528	1.78e-06	BIRC3,CXCL8,DUSP1,HIF1A,ICAM1,IL1B,IL2RA,PTGS2,SOD2,TNF	214 (20)
noscapine		chemical drug	Inhibited	-2.213	1.81e-06	BIRC3,CFLAR,ICAM1,PTGS2,TRAF1	190 (17)
triamcinolone hexacetonide		chemical drug		-1.982	2.16e-06	ICAM1,IL1A,IL1B,TNF
Org 48762-0		chemical drug	Inhibited	-2	2.16e-06	CCL3L3,CCL4,IL1B,TNF
fenretinide		chemical drug		-0.931	2.66e-06	BCL2A1,CFLAR,HIF1A,IL1B,NFE2L2,NFKBIA,PMAIP1,PPP1R15A,PTGS2,TRAF1	182 (15)
amphotericin B		chemical drug		0.826	2.67e-06	CCL4,CXCL8,IL1B,IL1RN,TNF	142 (16)
TPCA-1		chemical drug	Inhibited	-2.2	2.67e-06	CXCL8,IL1A,IL1B,TNF,TRAF1	134 (15)
desmopressin		biologic drug		0.225	2.93e-06	ACTB,ADM,ATP1A1,CAPG,CYBA,HSPA8,NFAT5,RPS3,S100A11,YWHAB
rolipram		chemical drug		-0.68	2.99e-06	AREG,DUSP1,IL1B,PDE4B,PTGS2,PTPN1,TNF	189 (20)
alpha-tocopherol		chemical drug		-1.309	3.57e-06	CD36,CXCL3,IL1A,IL1B,PMAIP1,TNF	185 (18)
nystatin		chemical drug		1.71	3.84e-06	CCL3L3,CXCL8,ICAM1,IL1B,TNF	138 (17)
metronidazole		chemical drug		0.302	4.7e-06	BACH1,C1QB,CD63,CD9,CST3,CTSB,FXYD5,IL1B,LGALS1,STAT3,TNF
lonafarnib		chemical drug	Inhibited	-2.236	5.37e-06	BCL2A1,BIRC3,CFLAR,PTGS2,TRAF1	155 (21)
as605240		chemical drug		-1.432	5.37e-06	CXCL2,CXCL3,IL1B,IL2RA,TNF	117 (10)
vadimezan		chemical drug	Activated	2.198	5.37e-06	ICAM1,IRF1,NFKB1,NFKBIA,TNF	186 (17)
gamma-tocotrienol		chemical drug		-0.518	5.37e-06	IL1B,NFKBIA,NLRP3,TNF,TNFAIP3	128 (17)
bempedoic acid		chemical drug	Inhibited	-2.236	5.37e-06	CCL4,CXCL8,ICAM1,IL1B,TNF	210 (24)
androgen		chemical drug		0.788	5.52e-06	BTG2,CCND3,CD44,CTSB,NFKBIA,PTEN,PTGS2,PTPN1,SDC4,STAT3,TNFAIP8,VMP1,YBX1	186 (21)
KN-62		chemical drug		-1.664	5.58e-06	CXCL8,EGR1,IL1B,PPP1R15A,PTGS2,TNF	212 (25)
enterotoxin B		biologic drug	Activated	2.775	5.87e-06	CCL3L3,CCL4,CXCL2,CXCL3,ICAM1,IL1B,IL2RA,TNF,TNFAIP3	184 (12)
GW501516		chemical drug		0.555	5.94e-06	ACSL1,CFD,FLT1,ICAM1,IL1A,IL1B,PTEN,PTGS2,S100A8,S100A9,THBS1	174 (19)
fulvestrant		chemical drug		0.148	6.17e-06	AREG,DYNLL1,EGR1,FLT1,GSTP1,H2AZ1,ICAM1,IL1B,IRF1,LDLR,PMAIP1,PTEN,PTGS2,SERPINB9,STAT3,TNF,ZFX	216 (22)
Go6983		chemical drug		-0.714	7.34e-06	CD36,FLT1,PRKCE,PTGS2,TRAF1	148 (17)
ivermectin		chemical drug	Activated	2	7.6e-06	CXCL2,CXCL8,IL1B,NLRP3	73 (5)
RWJ 67657		chemical drug		-1.941	7.6e-06	CXCL8,IL1B,PTGS2,TNF	179 (15)
conjugated linoleic acid		chemical drug		0.092	7.9e-06	CXCL8,DUSP1,IL1RN,ITGB2,LTA4H,PTGS2,TNF	183 (18)
fasudil		chemical drug		-1.383	7.9e-06	CD14,ICAM1,IL1B,SLC1A2,SLC1A3,TLR4,TNF	147 (18)
dextran sulfate		chemical drug	Activated	2.155	7.98e-06	CCL20,CCL3L3,CCL4,CD14,CD36,CXCL2,CXCL3,CXCL8,ICAM1,IL1B,NLRP3,PTGS2,S100A8,S100A9,STAT3,THBS1,TLR4,TNF	145 (15)
silicon dioxide		chemical drug		1.484	8.42e-06	CST3,CXCL8,EGR1,IL1B,MAP1LC3B,TNF	199 (22)
allopurinol		chemical drug		-1.32	8.6e-06	BIRC3,CD14,CD44,FCGR2A,FXYD5,IL1B,PTGS2,S100A11,TLR4,TMSB10/TMSB4X	116 (14)
streptozocin		chemical drug		1.164	9.77e-06	AQP9,ATF6,ATP1A1,CCL3L3,CCND3,CXCL2,HIF1A,ICAM1,IL1B,INSR,MAP1LC3B,PTEN,PTGS2,SLC1A2,SLC1A3,SOD2,TNF,YBX1	169 (24)
triflusal		chemical drug	Inhibited	-2.198	9.82e-06	CCL3,CCL4,CXCL8,PTGS2,TNF	122 (10)
bleomycin		biologic drug		1.071	9.97e-06	APOE,CCL3L3,CXCL2,CXCL3,HIF1A,HSP90AA1,ICAM1,IL1A,IL1B,MAFF,MAP1LC3B,PTEN,S100A4,SDC4,STAT3,THBS1,TNF	197 (19)
anakinra		biologic drug	Inhibited	-2.391	1.02e-05	CCL4,ICAM1,IL1A,IL1B,PTGS2,TNF	196 (20)
tempol		chemical drug		-0.655	1.06e-05	CXCL2,CXCL8,CYBA,GCH1,ICAM1,PTGS2,SOD2	161 (19)
ketorolac		chemical drug		1.103	1.25e-05	CXCL8,HIF1A,NFKBIA,PTGS2	120 (11)
tin mesoporphyrin		chemical drug	Activated	2	1.25e-05	CCL3L3,ICAM1,IL1B,TNF	102 (7)
polymyxin B		biologic drug		-1.964	1.25e-05	CXCL8,IL1B,LDLR,TNF	119 (15)
ethylenediaminetetraacetic acid		chemical drug	Inhibited	-2.236	1.29e-05	BCL2A1,CXCL8,EGR1,IL1B,TNF	198 (22)
imatinib		chemical drug		-1.969	1.39e-05	ATF6,ATP6V0B,ATP6V1F,CFLAR,COX5B,COX6B1,COX7C,HSPA8,IL1B,IRF1,MT2A,NDUFA4,SDHD,SLC25A6,STAT3,TNF,TNFAIP3,UQCR10	133 (19)
ammonium chloride		chemical drug		-0.128	1.48e-05	ATP1A1,CD9,CTSB,GRN,IL1B,LDLR	168 (16)
(+)-epicatechin		chemical drug			1.6e-05	IL1B,PTGS2,TNF
senexin B		chemical drug			1.6e-05	CXCL2,CXCL8,STAT3
eicosapentenoic acid		chemical drug		-1.558	1.62e-05	APOE,CD36,CD44,IL1B,IL1R2,IL2RA,LDLR,NFE2L2,NFKB1,PTGS2,TNF	182 (23)
ABT-737		chemical drug	Activated	2.236	1.67e-05	BCL2A1,CXCL3,CXCL8,IRF1,PMAIP1	191 (20)
interferon alfacon-1		biologic drug		1.633	1.76e-05	ARL4C,CXCL8,HIPK2,IL1R2,MAFF,SSR4
methamphetamine		chemical drug	Activated	2.198	1.99e-05	ALDH1A2,EGR1,GBP2,ICAM1,IL1A,IL1B,LGALS1,NDUFA4,NDUFB10,PTPN12,SLC1A2,TNF	202 (25)
promegestone		chemical drug	Activated	2.763	1.99e-05	AREG,BCL6,BIRC3,BTG2,FKBP5,MT2A,NFKBIA,STAT3,ZBTB16	208 (21)
butaprost		chemical drug		0.154	2.14e-05	CCL3L3,CCL4,IL1B,PTGS2,TNF	143 (18)
quercetin		chemical drug		-0.159	2.33e-05	BIRC3,CD44,CD63,CXCL8,EGR1,GSTP1,HIF1A,HIPK2,ICAM1,IL1B,LDLR,NFE2L2,PPP1R15A,PTGS2,TNF	188 (21)
fingolimod		chemical drug		-0.714	2.36e-05	CCL20,CCL4,CCND3,CD36,CXCL2,ICAM1,IL1B,PTEN,TNF,TSPO	162 (21)
sodium tungstate		chemical drug		0	2.45e-05	ACTB,HSPA8,INSR,SOD2,TPI1,TUBA1A	115 (7)
caffeic acid		chemical drug		-1	2.7e-05	CXCL8,NFE2L2,PTGS2,TLR4,TNF	180 (23)
PF-4878691		chemical drug	Activated	2.423	2.87e-05	CCL3,CCL4,CXCL8,IL1B,PTGS2,TNF	87 (7)
buthionine sulfoximine		chemical drug		-0.182	2.87e-05	CD36,IL2RA,NFE2L2,NFKBIA,PTGS2,TNFAIP3	155 (20)
eplerenone		chemical drug		-1.445	2.87e-05	CYBA,ICAM1,IL1B,NFKB1,PTGS2,TNF	207 (21)
ciglitazone		chemical drug		-0.171	2.91e-05	APOE,CD36,CFLAR,CXCL8,FLT1,ICAM1,NFKBIA,PTEN,PTGS2,SCGB1A1,TNF	164 (19)
aprepitant		chemical drug		0	3.35e-05	CXCL8,EGR1,S100A8,S100A9,SULF2,TNFAIP3
vinblastine		chemical drug		1.382	3.35e-05	HIF1A,IL1B,PMAIP1,PTGS2,SOD2,TNF	185 (19)
dexamethasone phosphate		chemical drug		1.342	3.36e-05	BCL6,DUSP1,IL1B,NFKBIA,THBS1	152 (7)
docosahexaenoic acid		chemical drug	Inhibited	-2.717	3.74e-05	APOE,BACH1,BCL2A1,CCL3,CCL4,CD44,CXCL8,IL1B,LDLR,NFE2L2,NFKB1,PTEN,PTGS2,THBS1,TNF	185 (17)
tamoxifen		chemical drug		1.254	3.83e-05	ADM,AQP9,CD36,CFLAR,CXCL8,HIF1A,IL1RN,IRF1,ISG20,LDLR,MAFF,PFN1,PTGS2,SLC1A2,SOD2,TLR4,TNF	159 (21)
eritoran		chemical drug			3.95e-05	CXCL8,IL1B,TNF	110 (9)
tranexamic acid		chemical drug			3.95e-05	IL1A,IL1B,TNF	119 (11)
aspirin		chemical drug	Inhibited	-2.739	4.01e-05	ADM,CCL3,CCL4,CXCL8,FLT1,ICAM1,IL1A,IL1B,PMAIP1,PTGS2,SERPINB9,THBS1,TNF	161 (18)
etanercept		biologic drug	Inhibited	-2.425	4.49e-05	CCL20,CXCL8,ICAM1,IL1B,PTGS2,TNF	195 (18)
vismodegib		chemical drug		-0.942	4.7e-05	CD14,GPX1,IL1A,IL1B,MTSS1,NFE2L2,TNF
plumbagin		chemical drug	Inhibited	-2.236	5.07e-05	BCL2A1,BIRC3,CFLAR,PRKCE,PTGS2	147 (19)
1-chloro-2,4-dinitrobenzene		chemical drug	Activated	2.2	5.07e-05	CCL20,CCL4,IL1B,IL1R2,TNF	159 (10)
morphine		chemical drug		0.26	5.28e-05	ADM,AIF1,CCL3L3,CXCL8,IL1B,PTEN,PTGS2,SLC1A2,THBS1,TLR4,TNF	129 (16)
vitamin E		chemical drug		-1.316	5.5e-05	CD36,CD44,EGR1,IL1A,IL1B,KLF6,PTGS2,TNF	183 (21)
pioglitazone		chemical drug	Inhibited	-2.146	5.6e-05	APOE,CD36,CFD,COX4I1,CXCL8,EGR1,ICAM1,IL1B,IL1RN,LDLR,PTGS2,SOD2,TNF	177 (20)
zileuton		chemical drug		-0.849	5.66e-05	CCL3L3,ICAM1,PTGS2,TNF	191 (18)
loxoribine		chemical drug		0.569	5.66e-05	CXCL8,PTGS2,TLR4,TNF	142 (22)
fenofibrate		chemical drug		-1.089	5.87e-05	ACSL1,ALDH1A2,CD36,CXCL8,DBI,HIF1A,ICAM1,LDLR,NFKB1,PTGS2,RBFOX2,SLC27A4,SOD2,STAT3,TNF	156 (19)
paricalcitol		chemical drug		-1.342	5.93e-05	ICAM1,IL1B,NLRP3,PTGS2,PYCARD,TNF	131 (14)
colistin		biologic drug		1	6.48e-05	BACH1,C1QB,CD63,CD9,CST3,CTSB,FXYD5,LGALS1,STAT3
2-deoxyglucose		chemical drug		-0.542	6.48e-05	CFLAR,CXCL8,GPX1,HIF1A,IL1B,INSR,PTGS2,SOD2,TNF	173 (24)
PP1		chemical drug	Inhibited	-2.39	6.78e-05	CXCL8,IL1A,IL1B,IL1RN,PTGS2,TNF	138 (19)
fisetin		chemical drug	Inhibited	-2.449	6.78e-05	BIRC3,CCL3L3,ICAM1,NFKBIA,PTGS2,TRAF1	190 (20)
geldanamycin		chemical drug		-1.778	7.15e-05	CCND3,CFLAR,CXCL8,ELOB,FKBP5,GSTP1,HIF1A,HSP90AA1,IRF1,NFKB1,NLRP3,PFN1,PTGS2,SLC1A2,TNF	192 (21)
17-alpha-ethinylestradiol		chemical drug		-1.299	7.39e-05	ADGRE5,APOE,AQP9,C1QB,C1QC,CCL3L3,CXCL3,INPP5A,LDLR,PLK3,TNF	195 (18)
kanamycin A		chemical drug		1	7.47e-05	BACH1,C1QB,CD63,CD9,CST3,CTSB,FXYD5,LGALS1,STAT3
monophosphoryl lipid A		chemical drug		1.965	7.63e-05	IL1A,IL1B,IL1RN,TNF	135 (16)
pituitary adenylate cyclase-activating polypeptide		biologic drug			7.71e-05	ADM,CCND3,DUSP6,EGR1,GCH1,SELENOT	77 (7)
ceruletide		biologic drug	Activated	2.219	7.71e-05	ACTG1,CFLAR,CXCL2,CXCL3,PTGS2,TNF	186 (16)
pentoxifylline		chemical drug		-1.72	7.71e-05	CXCL3,ICAM1,IL1B,NFKBIA,REL,TNF	194 (18)
obinutuzumab		biologic drug			7.82e-05	CCL3,CCL4,TNF
taselisib		chemical drug			7.82e-05	CCL3,CCL4,TNF
sunitinib		chemical drug		-1.709	7.92e-05	CCND3,CD44,CXCL3,ECE1,ICAM1,IL2RA,ITGB2	131 (17)
lomustine		chemical drug		-0.378	7.92e-05	BIRC3,CD14,CD44,FCGR2A,FXYD5,S100A11,TMSB10/TMSB4X
celecoxib		chemical drug		-1.222	8.3e-05	BCL2A1,CFLAR,HIF1A,ICAM1,IL1B,PTGS2,SLC25A6,TLR4,TNF,TRAF1	122 (17)
berberine		chemical drug		-0.939	8.3e-05	BIRC3,CFLAR,CXCL8,HIF1A,ICAM1,IL1B,INSR,LDLR,PTGS2,TNF	179 (20)
palbociclib		chemical drug	Activated	2.121	9.06e-05	ADM,DUSP1,EGR1,GADD45B,NFKB1,PPP1R15A,TET2,ZFP36	178 (15)
Y 27632		chemical drug		-0.788	9.06e-05	ACTB,ACTG1,CD44,CXCL2,ICAM1,PTGS2,THBS1,TNF	196 (20)
valproic acid		chemical drug		1.334	9.06e-05	ATF6,CD36,CD44,CH25H,CTSB,DBI,GADD45B,HIF1A,ICAM1,IL1A,LDLR,NPC2,PSMA7,PTEN,PTGS2,S100A4,SERP1,SLC1A2,STAT3,THBS1,TNF	177 (19)
sodium selenite		chemical drug		-1.536	0.000104	COX4I1,IL1B,PTGS2,TBXAS1,TNF	182 (16)
triamterene		chemical drug		-0.57	0.000106	BIRC3,CD14,CD44,FCGR2A,FXYD5,S100A11,TMSB10/TMSB4X
cytarabine		chemical drug	Activated	2.607	0.000106	ADGRE5,CCL3L3,CD55,GPR132,ICAM1,IL1B,TNF	141 (20)
chloroquine		chemical drug	Inhibited	-2.035	0.000106	ATP1A1,CD36,CXCL8,GRN,HIF1A,IL1B,MAP1LC3B,TNF	152 (18)
emodin		chemical drug	Inhibited	-2.117	0.000116	CXCL3,CXCL8,ICAM1,IL1B,SOD2,TLR4,TNF	181 (18)
vitamin D		chemical drug		-1.342	0.000127	CCL3L3,IL1B,INSR,NFKBIA,S100A8,TLR4,TNF	164 (17)
ciprofloxacin		chemical drug		-1.18	0.000128	GRN,ICAM1,LDLR,PTGS2,RPL10A,RPL12,RPL7A,RPS18,TNF	95 (8)
palmitoylethanolamide		chemical drug		-1.067	0.00013	AIF1,IL1B,PTGS2,TNF	189 (23)
5R-hydroxytriptolide		chemical drug			0.000135	CD14,IRF1,TLR4
iguratimod		chemical drug			0.000135	CXCL2,CXCL3,TNF	132 (17)
PRN694		chemical drug			0.000135	NFKBIA,NFKBIZ,TNFAIP3	75 (7)
famotidine		chemical drug			0.000135	CXCL2,ICAM1,TNF	87 (7)
autologous CD22-targeted CAR-T cells		biologic drug			0.000135	CCL3,CXCL8,IL1B
evodenoson		chemical drug			0.000135	CXCL8,PTGS2,TNF	92 (7)
lansoprazole		chemical drug			0.000135	CD14,CXCL8,PTGS2	84 (7)
dimaprit		chemical drug			0.000135	ICAM1,LDLR,TNF
raloxifene		chemical drug	Inhibited	-2.333	0.000138	AREG,DUSP1,DYNLL1,KLF6,KYNU,LDLR,LITAF,PLK3,PTGS2,TNF,ZFX	214 (24)
alitretinoin		chemical drug		0.13	0.000138	BCL2A1,CCL20,CCND3,CD14,CD36,COX4I1,DUSP1,GK,IL2RA,IRF1,PMAIP1	217 (21)
fluvastatin		chemical drug		0.364	0.000157	CD9,CXCL8,CYBA,GCH1,PTGS2,TNF	193 (25)
cocaine		chemical drug	Activated	2.755	0.000161	CXCL2,CXCL8,DUSP1,DYNLL1,EGR1,GADD45B,ICAM1,NFKB1,SLC1A2,THBS1,TNF,TSPO	207 (24)
TGAL copolymer		biologic drug		-0.345	0.000165	CXCL8,IL1B,IL1RN,TNF	132 (13)
glycyrrhetinic acid		chemical drug		-0.914	0.000165	ATP1A1,CCL3L3,ICAM1,TLR4	165 (15)
gentamicin C		chemical drug		-0.378	0.000166	BIRC3,CD14,CD44,FCGR2A,FXYD5,S100A11,TMSB10/TMSB4X
ibrutinib		chemical drug		0.905	0.000168	ALDOA,ATP6V0E1,ATP6V1F,CD44,COX6B1,COX7C,EIF4E,RPS6,SDHD,TNF,TPI1,WDR74
PC-SPES		chemical drug			0.000191	CD9,FTL,HSP90AA1,IL1B,IRF1,MYL6,PPP1R15A,TMSB10/TMSB4X
bromodeoxyuridine		chemical drug		1.524	0.000195	CXCL8,GSTP1,IL1A,IL1B,IRF1,TNF	207 (20)
obeticholic acid		chemical drug	Inhibited	-2.425	0.000195	CXCL2,CXCL3,ICAM1,IL1B,PTGS2,TNF	186 (14)
daidzein		chemical drug		-0.164	0.000205	AIF1,APOE,FXYD5,ITGB2,LCP2,LDLR,NFE2L2,PTGS2	170 (15)
CEP-1347		chemical drug		-1.969	0.000206	CCL3L3,CCL4,PTGS2,TNF	180 (16)
diethylstilbestrol		chemical drug		1.38	0.000212	AQP9,AREG,ARHGDIB,BCL6,CD14,CD55,CYRIA,DUSP6,EGR1,EREG,IL1R2,LGALS1,RIN2,S100A6,S100A8	157 (13)
AGI-1067		chemical drug			0.000214	EGR1,IL1B,TNF	206 (21)
magnesium sulfate		chemical drug			0.000214	ADM,NFKBIA,TNF	100 (7)
alpha-tocopherol succinate		chemical drug			0.000214	EGR1,IL1A,TNF	74 (7)
irbesartan		chemical drug		-1.131	0.000222	CD36,ICAM1,IL1B,INSR,TNF	214 (22)
ciprofibrate		chemical drug		-1.44	0.000226	CD36,CD63,CSTB,DBI,ETS2,GSTP1,ICAM1,NFKBIA,NPC2,RPL12	140 (12)
sodium arsenite		chemical drug		0.486	0.000232	CXCL8,EGR1,FKBP5,GADD45B,HIF1A,LITAF,NFE2L2	200 (18)
oblimersen		biologic drug	Activated	2.449	0.00024	ADM,CXCL8,DUSP1,GADD45B,MAFF,N4BP1
silibinin		chemical drug		-1.343	0.000252	CD44,CXCL8,EGR1,FLT1,HIF1A,NFKBIA,PTGS2	176 (21)
10-(6'-ubiquinonyl)decyltriphenylphosphonium		chemical drug		-1.154	0.000254	IL1A,IL1B,NFE2L2,PTGS2	184 (17)
urtica dioica extract		chemical drug			0.000255	IL1B,TNF
ATB-346		chemical drug			0.000255	IL1B,TNF
fidarestat		chemical drug			0.000255	NLRP3,PYCARD
tyrphostin B56		chemical drug			0.000255	ICAM1,TNF	94 (7)
deferasirox		chemical drug		-0.555	0.000291	CCND3,GAS7,ITGB2,SULF2,TNF	19 (3)
amiodarone		chemical drug			0.000293	CXCL8,GRN,ICAM1,LDLR,SOD2,TNF	175 (22)
bafilomycin A1		chemical drug	Inhibited	-2.407	0.000293	CD9,GRN,IL1B,NFKBIA,PTGS2,TNF	223 (27)
montelukast		chemical drug	Inhibited	-2	0.00031	ANPEP,CD63,CXCL8,NFKB1
erythromycin		chemical drug		-1.993	0.00031	CXCL8,ICAM1,IL1B,TNF	135 (19)
leptomycin B		chemical drug		-0.849	0.00031	CCL20,IL1B,PTGS2,TNF	193 (26)
metformin		chemical drug		-0.319	0.000311	ALDOA,ATF6,CCND3,CXCL8,GADD45B,HIF1A,IL1B,IL1RN,INSR,NFE2L2,NFKBIA,PTGS2,SOD2,TNF	222 (25)
CYT003-QbG10		chemical drug			0.000317	CCL3,CCL4,TNF
fish oils		chemical drug		-0.391	0.000354	ACSL1,CCL3L3,IL1A,IL1B,PTGS2,TLR4	132 (15)
sulfasalazine		chemical drug		-1.925	0.000374	CXCL8,ICAM1,IL1B,NFKBIA	168 (20)
andrographolide		chemical drug	Inhibited	-2.236	0.000374	GSTP1,ICAM1,IL1B,PTGS2,TNF	205 (24)
gemcitabine		chemical drug	Activated	2.03	0.000397	AREG,CXCL8,EGR1,HIF1A,IL1B,PTGS2,VMP1	183 (22)
phenylbutazone		chemical drug		-0.728	0.000424	CD44,FCGR2A,FXYD5,PTGS2,S100A11,TMSB10/TMSB4X
coconut oil		chemical drug			0.000447	CXCL3,PTGS2,TNF	119 (11)
dabrafenib		chemical drug			0.000447	IL1B,NLRP3,PYCARD
adapalene		chemical drug			0.000447	CCL4,CXCL2,IL1B	202 (14)
tyrphostin AG 127		chemical drug			0.000447	IL1B,PTGS2,TNF	121 (21)
2-mercaptoacetate		chemical drug		1.98	0.000447	CXCL2,CXCL3,ICAM1,IL1B	151 (11)
probenecid		chemical drug	Inhibited	-2	0.000447	CCL3L3,CXCL2,IL1B,TNF	205 (19)
mevastatin		chemical drug		1.967	0.000447	APOE,LDLR,PTGS2,TNF	133 (13)
ilomastat		chemical drug		-1.972	0.000447	CXCL3,CXCL8,IL1B,TNF	119 (17)
minocycline		chemical drug		-1.846	0.000459	CXCL8,ICAM1,IL1A,IL1B,PTGS2,TLR4,TNF	131 (20)
lovastatin		chemical drug		-0.461	0.000469	APOE,CCND3,H2AZ1,IL1A,IL1B,IRF1,LDLR,PTGS2,SDC4,TNF	167 (18)
xanthohumol		chemical drug		-1.961	0.000474	BIRC3,ICAM1,IL1B,TLR4,TNF	114 (15)
fludarabine		chemical drug		-1.172	0.000474	CXCL2,HIF1A,IL1B,IRF1,TNF	199 (25)
THZ1		chemical drug		-1	0.00053	ARL4C,BIRC3,GPR183,TRAF1
mitoxantrone		chemical drug		0.697	0.000532	CXCL8,HIF1A,IL1B,PMAIP1,TNF	195 (18)
delta-9-tetrahydrocannabinol		chemical drug		0.555	0.000604	CFLAR,DUSP6,GPX1,IL1B,RPS9,SOD2,TNF	134 (16)
coal tar		chemical drug			0.000607	GPX1,GSTP1,PTGS2
sodium dodecyl sulfate		chemical drug			0.000607	FABP5,IL1B,TNF	41 (3)
carfilzomib		biologic drug		0.924	0.000623	IL1B,PMAIP1,PSMA7,TNF	187 (18)
bisindolylmaleimide iv		chemical drug	Inhibited	-2	0.000623	CXCL8,EGR1,PRKCH,TNF	219 (26)
pemetrexed		chemical drug		1.732	0.000727	CCL20,CD14,IL1A,IL1B
daporinad		chemical drug		-1.342	0.000734	CD44,ETS2,IL1B,NAMPT,TNF	170 (15)
chlormethiazole		chemical drug			0.000756	IL1B,TNF
pycnogenols		chemical drug			0.000756	CXCL8,PTGS2	154 (7)
VX 702		chemical drug			0.000756	IL1B,TNF
CRT-0066101		chemical drug			0.000756	CXCL8,TNF	144 (8)
prinaberel		chemical drug			0.000756	CXCL2,IL1B
zunsemetinib		chemical drug			0.000756	CXCL3,IL1B	139 (7)
clobetasol propionate		chemical drug			0.0008	FABP5,ICAM1,IL2RA
lentinan		chemical drug			0.0008	CXCL8,IL1B,TNF	188 (20)
KU-60019		chemical drug			0.0008	IL1B,PYCARD,TNF	171 (17)
BQ-788		biologic drug			0.0008	AQP9,CXCL2,TNF	97 (7)
tyrphostin AG 1296		chemical drug			0.0008	CD14,ICAM1,PTGS2	172 (12)
lamivudine		chemical drug			0.0008	CXCL8,EREG,PDE4B
pembrolizumab		biologic drug	Activated	2.236	0.000813	CCL3,CCL4,IL1B,IRF1,PTGS2
stallimycin		biologic drug	Activated	2.19	0.000813	CXCL8,IL1A,IL1B,IRF1,TNF	111 (10)
cannabidiol		chemical drug		-1	0.000843	HIF1A,IL1B,PTGS2,TNF	159 (18)
doxycycline		chemical drug		1.309	0.000888	CXCL3,IL1B,IL2RA,NFE2L2,PLK3,PTGS2,SOD2	120 (15)
ribavirin		chemical drug		1.703	0.000898	CCL3L3,CXCL8,IRF1,ITGB2,TNF	124 (18)
temozolomide		chemical drug		-0.425	0.000989	CFLAR,CXCL8,NFKBIA,PMAIP1,SOD2	194 (21)
vincristine		chemical drug	Activated	2.183	0.000989	EGR1,IL1B,PMAIP1,PTGS2,SOD2	180 (16)
lithium		chemical drug		-0.275	0.001	CXCL8,EGR1,NFKB1,PTGS2,SLC1A2,SYN1,YBX1	236 (27)
isoproterenol		chemical drug		0.932	0.00101	ATP1A1,CCL3L3,FPR2,IL1B,NAMPT,NLRP3,PTGS2,SOD2,TLR4,TNF	142 (17)
6-aminopyrazolopyrimidine derivative compound II		chemical drug			0.00103	CCL3L3,IL1A,TNF	101 (13)
orlistat		chemical drug			0.00103	CCL3L3,CXCL8,ICAM1	151 (16)
(+)-MK-801		chemical drug		-0.61	0.00107	ALDOA,EGR1,ICAM1,NFKBIA,PTGS2,STAT3,TNF	205 (23)
sildenafil		chemical drug		-1.387	0.00109	AIF1,CFLAR,FLT1,PTGS2,TNF	191 (20)
5-azacytidine		chemical drug	Activated	2.322	0.00109	CD44,DUSP1,GSTP1,HSPA8,KLF6,MAFF,PMAIP1,PNRC1,PTGS2,THBS1	124 (12)
pravastatin		chemical drug		-1.067	0.00111	ICAM1,IL1B,LDLR,SDC4,TLR4,TNF	188 (18)
artesunic acid		chemical drug		-1.98	0.00111	IL1B,PTGS2,TLR4,TNF	176 (16)
choline fenofibrate		chemical drug		0.9	0.00111	ACSL1,HIF1A,NFKBIA,NPC2	106 (7)
chelerythrine		chemical drug		0	0.00111	CXCL3,CYBA,ICAM1,NFKBIA	196 (20)
CL 316243		chemical drug		0.849	0.00119	CD36,COX4I1,IL1B,PTGS2,TNF	192 (27)
olaparib		chemical drug			0.00127	BTG2,CXCL8,PTGS2,TNF	191 (21)
teriflunomide		chemical drug			0.00129	ICAM1,IL1B,TNF	191 (21)
iron dextran		chemical drug			0.00129	IL1B,NFKBIA,TNF
perilla alcohol		chemical drug			0.00129	BCL2A1,IL1B,NFKBIA	179 (13)
epicatechin		chemical drug	Inhibited	-2.591	0.00134	ACTG1,IL1B,NFE2L2,PTGS2,S100A8,SULF2,TNF	199 (19)
pimagedine		chemical drug		-1	0.00143	CFLAR,CXCL8,GADD45B,ICAM1,TNF	182 (16)
cilostazol		chemical drug	Inhibited	-2.207	0.00143	ATF6,GCH1,ICAM1,TLR4,TNF	168 (15)
trans-cinnamaldehyde		chemical drug		-0.063	0.00144	CXCL8,EGR1,NFE2L2,PTGS2	126 (12)
vemurafenib		chemical drug		-0.832	0.00144	CXCL8,DUSP6,IL1B,NAMPT	169 (21)
pevonedistat		chemical drug		-1	0.00144	CFLAR,ICAM1,PMAIP1,TNF	192 (17)
paroxetine		chemical drug		-1.131	0.00144	ADM,CD55,IL1B,TNF	133 (16)
tyrphostin AG 1478		chemical drug		-1.769	0.00146	AREG,CXCL8,HIF1A,ICAM1,PTGS2,TNFAIP6	202 (24)
treprostinil		chemical drug			0.0015	IL1B,TNF	110 (7)
dienogest		chemical drug			0.0015	CXCL8,PTGS2
CC8490		chemical drug			0.0015	CXCL8,SOD2
K-604		chemical drug			0.0015	PTGS2,TNF
ONC-201		chemical drug			0.0015	IL1B,SLC1A2	113 (7)
belumosudil		chemical drug			0.0015	BCL6,STAT3	160 (9)
gabexate		chemical drug			0.0015	CXCL3,TNF	162 (14)
etodolac		chemical drug			0.0015	CD36,THBS1
ferrous sulfate		chemical drug			0.0015	CCL3L3,CCL4	97 (7)
vapreotide		biologic drug			0.0015	CXCL8,THBS1
myristoylated protein kinase C peptide inhibitor		biologic drug			0.0015	CD36,CD55	74 (7)
Vi capsular polysaccharide		chemical drug			0.0015	CXCL8,TNF	168 (12)
ibuprofen		chemical drug		-0.87	0.00155	CD36,HIF1A,IL1B,PTGS2,TNF	216 (24)
ouabain		chemical drug		-1.086	0.00155	ACTB,ATP1A1,FLT1,HIF1A,HSPA8	169 (12)
dimethyl sulfoxide		chemical drug		0.164	0.00158	ACTB,CCND3,CXCL8,IL1B,ITGB2,MEFV,SGMS2,TNF	149 (22)
staurosporine		chemical drug		-0.675	0.00158	BTG2,CCL4,CXCL8,FCGR2A,ICAM1,IL1B,ITGB2,PTGS2	133 (20)
FLZ		chemical drug			0.0016	PMAIP1,PTGS2,TNF	161 (18)
coomassie brilliant blue		chemical drug			0.0016	IL1B,PTGS2,TNF	195 (12)
astressin 2B		biologic drug			0.0016	CXCL2,KCNMA1,SYN1
D-tubocurarine		chemical drug			0.0016	EGR1,LITAF,TNF	117 (12)
ketamine		chemical drug		0.218	0.00162	CXCL8,KLF6,PTGS2,TNF	187 (22)
shikonin		chemical drug		0	0.00182	CD36,CXCL8,IL1B,TNF	190 (22)
acetovanillone		chemical drug		-0.6	0.00183	DUSP1,GPX1,HIF1A,PTGS2,SOD2	192 (22)
salirasib		chemical drug		0.447	0.00183	ADM,HIF1A,LGALS1,PFKFB3,TPI1
azithromycin		chemical drug			0.00194	CXCL3,IL1B,TNF	182 (19)
Ginkgo biloba		chemical drug			0.00194	CCL3,CCL4,IL1B	113 (7)
IACS-010759		chemical drug			0.00194	EREG,RPL11,RPL35A
salmeterol		chemical drug			0.00194	DUSP1,TLR4,TNF
icatibant		biologic drug			0.00194	ICAM1,PTGS2,STAT3	145 (14)
baicalein		chemical drug	Inhibited	-2.213	0.00199	APOE,CCND3,CXCL8,ICAM1,PTGS2	194 (21)
caffeine		chemical drug		-0.601	0.00202	COX4I1,CXCL8,EGR1,HIF1A,PTGS2,THBS1	199 (23)
rituximab		biologic drug			0.00204	BCL2A1,CCL3,CCL4,TNF	155 (17)
hymecromone		chemical drug			0.00204	CD44,CXCL8,NFKB1,TNFAIP6	140 (14)
entinostat		chemical drug		0	0.00215	CD44,CFLAR,DUSP1,HIF1A,NFE2L2,PMAIP1	197 (23)
clofibrate		chemical drug		-0.186	0.00217	CD36,CXCL8,GSTP1,IL1RN,LDLR,PTGS2,TNF	198 (22)
verteporfin		chemical drug		-0.577	0.00227	CXCL2,IL1B,NFKBIA,TNF	174 (19)
concanamycin A		chemical drug			0.00233	GRN,ICAM1,NFKBIA	72 (5)
chlorogenic acid		chemical drug			0.00233	PTGS2,TLR4,TNF	191 (21)
auranofin		chemical drug			0.00233	CXCL8,PTGS2,TNF	132 (23)
cortisone acetate		chemical drug			0.00247	IL1A,TNF
tylophorine		chemical drug			0.00247	PTGS2,TNF	184 (15)
astaxanthin		chemical drug			0.00247	NLRP3,PTGS2	87 (7)
LY379196		chemical drug			0.00247	CD55,EGR1
CP 96345		chemical drug			0.00247	CCL4,CXCL8
SD-282		chemical drug			0.00247	CXCL8,TNF	197 (20)
incyclinide		chemical drug			0.00247	PTGS2,TNF	185 (17)
vigabatrin		chemical drug			0.00247	IL1B,RPS6
clodronic acid		chemical drug		-0.707	0.00253	CD36,ICAM1,IL1B,TNF	191 (20)
methyl-beta-cyclodextrin		chemical drug			0.00253	CXCL8,HIF1A,LDLR,NFKB1	155 (20)
ritonavir		chemical drug		-1.091	0.00257	CD36,CFL1,CXCL8,GBP2,ICAM1,IL1B,LDLR,TNF	168 (20)
nifedipine		chemical drug		-0.816	0.00257	IL1A,IL1B,INSR,LDLR,PTGS2,TNF	204 (26)
spironolactone		chemical drug		-1.947	0.00265	DUSP1,FKBP5,ICAM1,IL1B,KCNMA1,PTGS2,TNF	171 (17)
carbamazepine		chemical drug		1.172	0.0027	BACH1,KLF9,MAP1LC3B,SOD2,STAT3	109 (7)
misoprostol		chemical drug			0.00276	IL1B,PTGS2,TNF	125 (17)
BMS-345541		chemical drug			0.00276	CXCL8,IL1B,NFKBIZ	86 (12)
ghrelin		biologic drug			0.00276	EGR1,IL1B,TNF	174 (21)
premarin		chemical drug			0.00276	AREG,CXCL8,TNF	89 (7)
selenium		chemical drug			0.0028	GPX1,PTGS2,SELENOT,STAT3
captopril		chemical drug		0.842	0.00306	CD44,FCGR2A,IL1RN,PTGS2,S100A11,TMSB10/TMSB4X	151 (9)
pitavastatin		chemical drug		-0.944	0.00309	CD36,NFKB1,PTGS2,TNF	190 (18)
alvocidib		chemical drug		-1.154	0.00309	AIF1,BIRC3,CCND3,CFLAR	167 (11)
SN-38		chemical drug			0.00309	BIRC3,CCL20,IL1A,NAMPT	104 (9)
luteolin		chemical drug		-1.506	0.00312	ICAM1,PTGS2,SOD2,TLR4,TNF	202 (20)
GnRH analog		biologic drug		0.277	0.00314	BCL2A1,DUSP1,DYNLL1,ENSA,FLT1,GABARAP,HIF1A,KLF7,KYNU,N4BP1,NFKBIA,TUBA1A,UQCRB
clarithromycin		chemical drug			0.00324	CXCL8,IL1B,TNF	157 (20)
zinc		chemical drug		-0.508	0.00341	IL1B,MT2A,NFKBIA,PDE4B,PTGS2,TNF	150 (15)
beta-glucan		chemical drug			0.00366	IL1B,IL1RN
inositol		chemical drug			0.00366	CD55,GCH1
GW2580		chemical drug			0.00366	IL1B,TNF	120 (16)
aliskiren		chemical drug			0.00366	CXCL2,TNF
glycitein		chemical drug			0.00366	IL1B,TNF	124 (15)
azilsartan		chemical drug			0.00366	IL1B,TNF
peptide T		biologic drug			0.00366	ICAM1,TNF
VTX-2337		chemical drug			0.00366	IL1B,TNF	104 (13)
emricasan		chemical drug			0.00366	CXCL2,CXCL3
ranitidine		chemical drug			0.00366	CXCL2,TNF	29 (3)
praziquantel		chemical drug			0.00366	CXCL8,TNF
curcuminoids		chemical drug			0.00366	ICAM1,NFE2L2
strychnine		chemical drug			0.00366	IL1B,TNF	80 (7)
ceftriaxone		chemical drug			0.00366	SLC1A2,SLC1A3
carvedilol		chemical drug		-1.067	0.00373	CYBA,IL1B,TLR4,TNF	166 (23)
tetraethylammonium		chemical drug		1	0.00408	HNRNPC,HSPA8,SSR4,TPI1
PD 169316		chemical drug			0.00435	BIRC3,CCND3,PTGS2	157 (10)
Trolox C		chemical drug			0.00435	CCL3L3,CXCL8,HIF1A	182 (21)
iloprost		chemical drug			0.00435	CXCL8,IL1B,TNF	160 (22)
1,25-dihydroxyvitamin D		chemical drug		0.555	0.00436	CXCL8,EGR1,STAT3,TLR4,TNF	192 (19)
phenacetin		chemical drug		0	0.00445	BIRC3,CD44,S100A11,TMSB10/TMSB4X
3,3'-diindolylmethane		chemical drug		-0.849	0.00494	IL1B,MAP1LC3B,NFKBIA,PTEN,PTGS2	177 (21)
blinatumomab		biologic drug			0.00507	CCL4,CXCL8
lupeol		chemical drug			0.00507	NFKB1,PTGS2
nadifloxacin		chemical drug			0.00507	CXCL8,IL1A
fangchinoline		chemical drug			0.00507	CXCL8,IL1B
diacerein		chemical drug			0.00507	IL1B,TNF	182 (22)
manidipine		chemical drug			0.00507	CXCL8,IL1B	164 (10)
atosibanum		biologic drug			0.00507	PTGS2,SLC1A2	74 (7)
napabucasin		chemical drug		-1.387	0.00526	ACTB,CD44,CXCL8,NFKB1,STAT3	93 (7)
valsartan		chemical drug		-1.457	0.00558	CYBA,ICAM1,IL1B,PTGS2,TNF	206 (22)
epirubicin		chemical drug			0.00566	DUSP1,EZR,IL1B
memantine		chemical drug		0.32	0.00618	GSTP1,NFKBIA,SLC1A2,STAT3
phenylephrine		chemical drug	Activated	2.425	0.00625	ATF6,DUSP1,EGR1,NFE2L2,PTGS2,TNF	149 (24)
thioctic acid		chemical drug		-1.969	0.00628	CXCL8,ICAM1,NFE2L2,SOD2,TNF	186 (22)
mocetinostat		chemical drug			0.00639	FLT1,IL1B,TNF	164 (17)
edaravone		chemical drug			0.00639	CXCL3,PTGS2,TNF	176 (18)
piperine		chemical drug			0.00639	IRF1,PTGS2,TNF	151 (18)
propylthiouracil		chemical drug	Activated	2.236	0.00649	BTG2,C1QB,CCND3,CXCL2,LGALS1,MGST3,PKP2,PTEN,SLC1A2,TMEM176B
ranolazine		chemical drug			0.00669	CXCL8,ICAM1	90 (7)
saracatinib		chemical drug			0.00669	IL1B,NLRP3
sotrastaurin		chemical drug			0.00669	IL2RA,NFKBIA
filgotinib		chemical drug			0.00669	IL1B,TNF	112 (13)
verlukast		chemical drug			0.00669	CCL4,TNF	164 (13)
dimercaptopropanol		chemical drug			0.00669	CXCL2,TNF	148 (19)
mechlorethamine		chemical drug			0.00669	IL1B,NFE2L2
salvianolic acid A		chemical drug			0.00669	DUSP6,GPX1
vardenafil		chemical drug			0.00669	IL1B,TNF	81 (5)
huperzine A		chemical drug			0.00669	IL1B,TNF
PD184352		chemical drug			0.00718	CFLAR,CXCL3,EGR1	171 (15)
nimesulide		chemical drug			0.00718	AREG,EREG,PTGS2	98 (7)
UCN-01		chemical drug			0.00718	CCND3,CXCL8,IL1B	186 (25)
mibolerone		chemical drug		-0.137	0.00739	ACSL1,DBI,FKBP5,LDLR,PRKCH,SERP1,TUBA1A
phenethyl isothiocyanate		chemical drug			0.00783	ATP6V0E1,H2AZ1,HSP90AA1,MAP4K3,MGST3,RPL3
zidovudine		chemical drug			0.00802	CCL3,CXCL8,IL1B	137 (15)
gemfibrozil		chemical drug		-0.585	0.00827	APOE,IL1B,LDLR,NFKBIA,TNF	187 (22)
propranolol		chemical drug		-1.732	0.00829	DUSP1,ICAM1,NFKBIA,PTGS2	146 (22)
lenalidomide		chemical drug		-0.149	0.00848	ACTG1,CARD16,CCL3,HIPK2,KCNMA1,NFKBIZ,PTEN,REL,TLR4,TNF	166 (11)
roxithromycin		chemical drug			0.00851	IL1B,TNF
ibudilast		chemical drug			0.00851	IL1B,TNF	151 (17)
R 406		chemical drug			0.00851	NFKBIZ,TNF
olmesartan		chemical drug			0.00851	CYBA,ICAM1
HG-9-91-01		chemical drug			0.00851	IL1B,TNF
selonsertib		chemical drug			0.00851	IL1B,TNF	160 (11)
niflumic acid		chemical drug			0.00851	CFLAR,CXCL8
ambroxol		chemical drug			0.00851	ICAM1,TNF	122 (12)
GW 5074		chemical drug			0.00851	PTGS2,TNF	162 (23)
dapansutrile		chemical drug			0.00851	IL1B,NFKB1
levofloxacin		chemical drug			0.00851	CXCL8,IL1A
tyrphostin		chemical drug			0.00851	CFLAR,CXCL2
polaprezinc		biologic drug			0.00851	CXCL8,TNF	141 (13)
bosentan		chemical drug			0.00891	EZR,ICAM1,TNF	192 (16)
K-252		chemical drug			0.00891	CD14,CXCL8,SOD2	162 (11)
oxaliplatin		chemical drug		-1.067	0.00918	CFLAR,PMAIP1,RPS6,STAT3,TMSB10/TMSB4X	95 (7)
ursolic acid		chemical drug			0.00966	IL1B,PTGS2,SOD2,STAT3,TLR4	194 (17)
rifaximin		chemical drug			0.00987	HNRNPC,HSP90AA1,RACK1
epicatechin gallate		chemical drug			0.00987	CXCL8,ICAM1,PTGS2	203 (22)
UM101		chemical drug			0.00987	CXCL8,IL1A,IL1B	149 (7)
black raspberry extract		chemical drug			0.0101	ARPC2,ATP6V0E1,CD44,H2AZ1,HSP90AA1,PLK3
capsaicin		chemical drug		0.449	0.0102	CXCL3,CXCL8,IL1B,PTGS2,TNF
SB 216763		chemical drug		0.845	0.0102	CXCL8,IL1B,PTGS2,TNF
secukinumab		biologic drug			0.0105	CCL20,CXCL8
pictilisib		chemical drug			0.0105	CXCL8,HIF1A
alpelisib		chemical drug			0.0105	PMAIP1,PTEN
IKK-2 inhibitor VIII		chemical drug			0.0105	CCL20,CXCL8
diazepam		chemical drug			0.0105	CXCL8,TSPO
gossypol		chemical drug			0.0105	CXCL8,PMAIP1
erismodegib		chemical drug			0.0109	IL1A,IL1B,MTSS1
irinotecan		chemical drug			0.0109	IL1B,PMAIP1,TNF
tetrandrine		chemical drug			0.0109	CXCL8,IL1B,YBX1
halofuginone		chemical drug			0.011	CD44,CD55,EGR1,LGALS1,NFE2L2,PPT1,TNF
carbamylcholine		chemical drug		0.882	0.0115	APOE,BTG2,ECE1,EGR1
carboplatin		chemical drug		1	0.0115	CD44,FCGR2A,FXYD5,PMAIP1
trametinib		chemical drug			0.0119	KLF7,TNF,TNFAIP3
JAK inhibitor I		chemical drug			0.0119	CXCL2,CXCL3,PTGS2
potassium chloride		chemical drug		1.109	0.0123	ATP1A1,BTG2,EGR1,IL1B,PTEN,PTGS2
2-[[9-isopropyl-6-[[4-(2-pyridyl)phenyl]methylamino]purin-2-yl]amino]butan-1-ol		chemical drug			0.0127	CCL3L3,TNF
ampicillin		chemical drug			0.0127	IL1B,TNF
R59949		chemical drug			0.0127	CCND3,CXCL8
IC87114		chemical drug			0.0127	ICAM1,TNF
nigericin		chemical drug			0.0127	IL1B,TNF
SU1498		chemical drug			0.0127	CD55,ICAM1
tyrphostin AG 1024		chemical drug			0.0127	HIF1A,PTGS2
dextran		chemical drug			0.0127	APOE,ICAM1
fluocinolone acetonide		chemical drug		0	0.013	FKBP5,IL1B,TNF,ZBTB16
acadesine		chemical drug			0.0131	EGR1,LDLR,PTGS2
colchicine		chemical drug		0.604	0.0147	HIF1A,IL1B,MEFV,PTGS2
N-methyl-D-aspartate		chemical drug	Activated	2.201	0.0148	EGR1,PTGS2,SLC1A2,SLC1A3,TNF
BBP-398		chemical drug			0.0151	DUSP6,EGR1
dovitinib		chemical drug			0.0151	CCL3,DUSP6
highly active antiretroviral therapy		chemical drug			0.0151	IL2RA,TNF
buparlisib		chemical drug			0.0151	NFE2L2,RPS6
LY-2510924		biologic drug			0.0151	CD14,LILRA5
telaglenastat		chemical drug			0.0151	ICAM1,ITGB2
NCX-4040		chemical drug			0.0151	GSTP1,PTGS2
alpha-methylparatyrosine		chemical drug			0.0151	CXCL3,IL1B
BMS-690514		chemical drug			0.0155	CCND3,HSP90AA1,HSPA8
fluvoxamine		chemical drug			0.0155	ACTB,RACK1,RPS9
carteolol		chemical drug			0.016	TNF
rifamycin SV		chemical drug			0.016	BCL6
bovine testicular hyaluronidase		biologic drug			0.016	CD44
cannogenin thevetoside		chemical drug			0.016	HIF1A
canakinumab		biologic drug			0.016	IL1B
rimantadine		chemical drug			0.016	CXCL8
mapatumumab		biologic drug			0.016	CFLAR
regorafenib		chemical drug			0.016	STAT3
AT 406		chemical drug			0.016	TNF
AZD8186		chemical drug			0.016	PTEN
minozac free base		chemical drug			0.016	IL1B
diclofenac/hyaluronic acid		chemical drug			0.016	CFLAR
SRI-29132		chemical drug			0.016	TNF
erteberel		chemical drug			0.016	IL1B
beractant		chemical drug			0.016	CXCL8
merck C		chemical drug			0.016	TNF
impromidine		chemical drug			0.016	LDLR
BMS-275183		chemical drug			0.016	THBS1
deoxyspergualin		chemical drug			0.016	TNF
RP 48740		chemical drug			0.016	TNF
tolrestat		chemical drug			0.016	CXCL8
Ro 31-7549		chemical drug			0.016	PTGS2
allotrap 1258		chemical drug			0.016	TNF
leucyl-leucine-methyl ester		biologic drug			0.016	IL1B
tirofiban		chemical drug			0.016	TNF
poractant alfa		chemical drug			0.016	CXCL8
hydrocortisone phosphate		chemical drug			0.016	APOE
MK-0812		chemical drug			0.016	CD44
enalapril		biologic drug		1.172	0.0161	CYBA,PTGS2,S100A4,S100A6,SOD2
amphetamine		chemical drug			0.0168	EGR1,EZR,HSPA8,ICAM1,TNFAIP3
calcipotriene		chemical drug			0.0168	CXCL8,IL1B,PTGS2
glycyrrhizic acid		chemical drug			0.0168	AIF1,PTGS2,TNF
ulipristal acetate		chemical drug			0.0177	ADM,FLT1
darapladib		chemical drug			0.0177	IL1B,TNF
tocilizumab		biologic drug			0.0177	CCL4,CXCL8
pentylenetetrazol		chemical drug			0.0177	IL1B,SYN1
meloxicam		chemical drug			0.0177	HIF1A,PTGS2
SB 239063		chemical drug			0.0177	CXCL8,TNF
clonidine		chemical drug			0.0177	EGR1,TNF
mesalamine		chemical drug			0.0177	PTGS2,SOD2
pentazocine		chemical drug			0.0177	GPX1,NFE2L2
midostaurin		chemical drug			0.0177	CD36,PTGS2
suramin		chemical drug			0.0182	CXCL8,ICAM1,PTGS2
ramipril		chemical drug			0.0182	PTGS2,TLR4,TNF
seocalcitol		chemical drug	Activated	2	0.0183	AREG,PTEN,PTGS2,STAT3
green tea polyphenol		chemical drug			0.0196	ICAM1,IL1B,PTGS2
indole-3-carbinol		chemical drug			0.0196	NFE2L2,SFTPC,TRAF1
beraprost		chemical drug			0.0204	IL1B,TNF
IH636 grape seed proanthocyanidin extract		chemical drug			0.0204	IL1B,TNF
sevoflurane		chemical drug			0.0204	IL1B,TNF
trifluoperazine		chemical drug			0.0204	EGR1,HIF1A
muromonab-CD3		biologic drug			0.0204	IL2RA,TNF
BQ 123		biologic drug			0.0204	CXCL2,TNF
tetrathiomolybdate		chemical drug			0.0204	IL1A,IL2RA
docetaxel		chemical drug		0.115	0.0209	CCND3,GSTP1,IL1B,PTGS2,THBS1,TNF
betulinic acid		chemical drug			0.0211	CYBA,PTGS2,TLR4
dactolisib		chemical drug		1.067	0.0213	IL2RA,MAP1LC3B,RPS6,TPI1
eprenetapopt		chemical drug			0.0226	GADD45B,LIMK2,PMAIP1
linsidomine		chemical drug			0.0226	EGR1,PTGS2,TNF
triciribine		chemical drug			0.0233	CXCL3,SLC1A2
cetuximab		biologic drug			0.0233	HIF1A,STAT3
oxonic acid		chemical drug			0.0233	AREG,ICAM1
meclizine		chemical drug			0.0233	IL1A,NAMPT
geranylgeranylacetone		chemical drug			0.0233	BCL6,STAT3
pectin		chemical drug			0.0233	IL1B,TNF
imipramine		chemical drug			0.0242	EGR1,MAP1LC3B,TSPO
desipramine		chemical drug			0.0242	IL1B,PDE4B,TNF
rosuvastatin		chemical drug			0.0242	CYBA,LDLR,TNF
telmisartan		chemical drug		-0.805	0.0246	ACSL1,ICAM1,PTGS2,TNF
nitroglycerin		chemical drug			0.0264	CXCL8,FLT1
epothilone B		chemical drug			0.0264	BTG2,THBS1
clorgyline		chemical drug			0.0264	HIF1A,STAT3
indinavir		chemical drug			0.0264	CCL3,CD36
tin protoporphyrin IX		chemical drug			0.0264	FLT1,TNF
fevipiprant		chemical drug			0.0264	PTGS2,TNF
(-)-norephedrine		chemical drug			0.0264	LDLR,NPC2
cyclosporin		biologic drug			0.0264	CXCL8,ICAM1
theophylline		chemical drug			0.0264	CXCL8,THBS1
prostaglandin		chemical drug			0.0264	PTGS2,TNF
doxifluridine		chemical drug			0.0296	RPL10A,RPL3
triclosan		chemical drug			0.0296	AREG,TNF
fontolizumab		biologic drug			0.0296	NAMPT,TNF
dexmedetomidine		chemical drug			0.0296	CXCL8,PTGS2
SU5402		chemical drug			0.0296	CCL3,DUSP6
MK2206		chemical drug			0.0312	ACTB,HIF1A,PFKFB3
AZ5576		chemical drug			0.0317	BCL2A1
tenofovir		chemical drug			0.0317	CXCL8
gentamicin C1		chemical drug			0.0317	CD44
AZ26		chemical drug			0.0317	IL1B
abciximab		biologic drug			0.0317	TNF
ticagrelor		chemical drug			0.0317	ICAM1
axitinib		chemical drug			0.0317	IL2RA
CP-724,714		chemical drug			0.0317	VAMP8
alum compound		chemical drug			0.0317	IL1B
phosphodiesterase 4 inhibitor		chemical drug			0.0317	TNF
diaziquone		chemical drug			0.0317	IL1B
dalcetrapib		chemical drug			0.0317	TNF
Tpl2 kinase inhibitor		chemical drug			0.0317	PTGS2
hispidulin		chemical drug			0.0317	EGR1
(S,R)-3-phenyl-4,5-dihydro-5-isoxazole acetic acid		chemical drug			0.0317	TNF
HCV 796		chemical drug			0.0317	MAP1LC3B
dagrocorat		chemical drug			0.0317	TNF
PF-4308515		chemical drug			0.0317	TNF
5-fluorouracil/leucovorin/oxaliplatin		chemical drug			0.0317	COX4I1
lynestrenol		chemical drug			0.0317	APOE
apatinib		chemical drug			0.0317	FLT1
NU 7442		chemical drug			0.0317	EGR1
capmatinib		chemical drug			0.0317	AREG
nexrutine		chemical drug			0.0317	STAT3
indotecan		chemical drug			0.0317	HIF1A
BMS-863233		chemical drug			0.0317	STAT3
BAI		chemical drug			0.0317	CFLAR
bimekizumab		biologic drug			0.0317	CXCL8
minalrestat		chemical drug			0.0317	PRKCE
GTS 21		chemical drug			0.0317	TNF
vesnarinone		chemical drug			0.0317	TNF
primaquine		chemical drug			0.0317	GCH1
amlexanox		chemical drug			0.0317	HIF1A
cyclothiazide		chemical drug			0.0317	EGR1
L-threo-safingol		chemical drug			0.0317	CXCL8
propagermanium		chemical drug			0.0317	TNF
BIBX1522		chemical drug			0.0317	CXCL8
GYKI 52466		chemical drug			0.0317	SLC1A2
flunitrazepam		chemical drug			0.0317	CXCL8
oxazepam		chemical drug			0.0317	GADD45B
methylprednisolone acetate		chemical drug			0.0317	PTGS2
potassium iodide		chemical drug			0.0317	CXCL8
echium oil		chemical drug			0.0317	IL1B
eptifibatide		biologic drug			0.0317	TNF
brimapitide		biologic drug			0.0317	CXCL8
alpha-TEA		chemical drug			0.0317	CFLAR
KT 5926		chemical drug			0.0317	CD14
ceftazidime		chemical drug			0.0317	TNF
cladribine		chemical drug			0.0317	IL1B
WP1066		chemical drug			0.0329	HIF1A,IL1B
PI-103		chemical drug			0.0329	CFLAR,PMAIP1
pterostilbene		chemical drug			0.0329	STAT3,TNF
vinorelbine		chemical drug			0.0329	LGALS1,PMAIP1
rebamipide		chemical drug			0.0329	CXCL8,SOD2
rasagiline		chemical drug			0.0331	EGR1,PRKCE,RACK1
sulindac sulfide		chemical drug		0.883	0.0349	DYNLL1,EGR1,PTGS2,STAT3
isotretinoin		biologic drug		-1	0.0364	CXCL8,IRF1,PTGS2,S100A9
moxonidine		chemical drug			0.0364	ANPEP,INSR
picropodophyllin		chemical drug			0.0364	HIF1A,ZBTB16
pomalidomide		chemical drug			0.0364	CCL3,IL1A
amiloride		chemical drug			0.0364	ATP1A1,PTGS2
clenbuterol		chemical drug			0.0364	IL1B,IL1RN
reserpine		chemical drug			0.0364	EGR1,IL1B
melphalan		chemical drug			0.0364	FLT1,TNF
thymoquinone		chemical drug			0.0371	CD14,TLR4,TNF
crizotinib		chemical drug			0.0391	AREG,COX4I1,SOD2
chloropromazine		chemical drug			0.0391	IL1B,LDLR,TNF
aldesleukin		biologic drug			0.0391	FCGR2A,IFNGR2,IRF1
meldonium		chemical drug			0.04	CD36,LDLR
dacinostat		chemical drug			0.04	CFLAR,HIF1A
C-21		chemical drug			0.04	IL1B,TNF
ponesimod		chemical drug			0.04	MT2A,THBS1
ethyl pyruvate		chemical drug			0.04	PTGS2,TNF
cerulenin		chemical drug			0.04	IL1B,TNF
amlodipine		chemical drug			0.04	LDLR,PTGS2
rifampin		chemical drug		-1.131	0.0407	CD14,CD36,CFL1,GBP2,GSTP1,IL1B
ezetimibe		chemical drug			0.0435	CH25H,LDLR,TNF
cryptotanshinone		chemical drug			0.0438	CD14,TLR4
tranilast		chemical drug			0.0438	CXCL8,TNF
PD 153035		chemical drug			0.0438	CXCL8,PTGS2
idarubicin		chemical drug			0.0438	IL1B,TP53BP2
SB 220025		chemical drug			0.0472	CXCL8
mepazine		chemical drug			0.0472	REL
EDP-305		chemical drug			0.0472	TNF
cyanovirin-N		biologic drug			0.0472	IL2RA
MLN8054		chemical drug			0.0472	PMAIP1
hexa-D-arginine		biologic drug			0.0472	PTGS2
alpha-pinene		chemical drug			0.0472	TNF
SRT2104		chemical drug			0.0472	CD63
botulinum toxin type A		biologic drug			0.0472	S100A4
17alpha-hydroxyprogesterone caproate		chemical drug			0.0472	PTGS2
Zingiber officiale ginger extract		chemical drug			0.0472	IL1B
apitolisib		chemical drug			0.0472	RPS6
cobimetinib		chemical drug			0.0472	CD44
cetuximab/radiotherapy		biologic drug			0.0472	FLT1
anagliptin		chemical drug			0.0472	TNF
acalabrutinib		chemical drug			0.0472	TNF
LY-2584702		chemical drug			0.0472	TNF
navtemadlin		chemical drug			0.0472	SCGB1A1
beta2 adrenergic receptor agonist		chemical drug			0.0472	TNF
semapimod		chemical drug			0.0472	PTGS2
tianeptine		chemical drug			0.0472	SLC1A2
SC68376		chemical drug			0.0472	PTGS2
nitrous oxide		chemical drug			0.0472	TNF
SK & F 86002		chemical drug			0.0472	TNF
bepridil		chemical drug			0.0472	GRN
dilazep		chemical drug			0.0472	TNF
fosfomycin		chemical drug			0.0472	CXCL8
albendazole		chemical drug			0.0472	ICAM1
amifostine		chemical drug			0.0472	PTGS2
rocuronium		chemical drug			0.0472	PTGS2
minodronate		chemical drug			0.0472	ICAM1
ketotifen		chemical drug			0.0472	TNF
tropicamide		chemical drug			0.0472	TNF
AX15839		chemical drug			0.0472	CXCL8
idronoxil		chemical drug			0.0472	CFLAR
TTI-101		chemical drug			0.0472	HIF1A
serpin peptide 16		biologic drug			0.0472	TLR4
magnesium chloride		chemical drug			0.0472	TNF
procaterol		chemical drug			0.0472	ICAM1
AZD4573		chemical drug			0.0472	BCL2A1
bacitracin		biologic drug			0.0472	TNF
GNE-317		chemical drug			0.0472	RPS6
ropinirole		chemical drug			0.0472	EGR1
tenidap		chemical drug			0.0472	PTGS2
Ad-ISF35		biologic drug			0.0472	IL1A
aluminum		chemical drug			0.0472	IL1B
SR 31747		chemical drug			0.0472	TNF
GW 274150		chemical drug			0.0472	COX4I1
tibolone		chemical drug			0.0472	PFKFB3
flunisolide		chemical drug			0.0472	ICAM1
dexanabinol		chemical drug			0.0472	TNF
neomycin		chemical drug			0.0477	IL1B,TNF
INT-767		chemical drug			0.0477	IL1B,TNF
tranylcypromine		chemical drug			0.0477	HIF1A,PDE4B
lapatinib		chemical drug			0.0477	AREG,EREG

## Sheet: 0 vs 12
© 2000-2022 QIAGEN. All rights reserved.
Upstream Regulator	Expr Log Ratio	Molecule Type	Predicted Activation State	Activation z-score	p-value of overlap	Target Molecules in Dataset	Mechanistic Network
dexamethasone		chemical drug		-1.502	1.1e-20	AKR1C1/AKR1C2,AKR1C3,APOE,APP,ATP1B1,B3GNT5,C1QB,CAMP,CD36,CD44,CD52,CFD,CRIP1,CTSC,CTSL,DAPK1,DEFB1,FABP4,FGD4,FTL,HLA-DRA,HLA-DRB5,HMOX1,HPGD,HSPA9,HSPH1,IFI6,IGFBP2,JUND,KLF4,LGALS1,LST1,MGST1,MMP2,MSR1,MT1G,MT1X,OASL,PABPC1,PDE4B,PELI1,PKP2,PLIN2,POR,RBP4,RGCC,RPS23,S100A8,SAMHD1,SCD,SERPING1,SOD2,THBS1,TNFAIP3,UBC,UQCRQ	98 (24)
lipopolysaccharide		chemical drug		0.328	1.8e-18	AKR1C3,APOC1,APOE,APP,C1QC,CAMP,CD163L1,CD36,CD44,CD63,CFD,CSTB,CTSC,CTSL,CYTIP,DEFB1,DNAJB1,FABP4,HLA-DRB5,HMOX1,HPGD,HSPA1A/HSPA1B,HSPB1,IFI6,IL2RG,JUND,KLF4,LGALS1,LRRFIP1,LST1,LTA4H,MMP2,MSR1,MT2A,NCL,NUPR1,OASL,PDE4B,PELI1,PLAC8,PLIN2,PVR,RBPJ,RGCC,RND3,S100A8,SAMHD1,SLC16A10,SOD2,STAT3,STXBP2,TANC2,THBS1,TNFAIP3,TREM1,TTC39B	93 (20)
rosiglitazone		chemical drug	Inhibited	-2.914	6.31e-14	APOC1,APOE,C1QB,C1QC,CD36,CFD,FABP4,HLA-DRA,HMOX1,HPGD,HSPA9,IGFBP2,KLF4,MSR1,PLIN2,PTPN1,RBP4,S100A8,SAMHD1,SCD,SOD2,THBS1,UQCRQ	80 (17)
fluticasone propionate		chemical drug		-1.311	3.97e-11	C1QB,CAMP,CD36,FABP4,HLA-DRA,HPGD,LST1,MT1X,MT2A,PLAC8,PLIN2,S100A8,THBS1	46 (4)
trichostatin A		chemical drug		-0.375	2.52e-10	APOE,APP,CAMP,CD36,CD44,COLEC12,FABP4,FTL,HLA-DRA,HMOX1,HSPA9,IGFBP2,JUND,KLF4,LGALS1,MGST1,MGST3,MMP2,RND3,RPS27,RSF1,SDC2,SERPINB5,SOD2,STAT3,THBS1	91 (18)
tanespimycin		chemical drug	Inhibited	-2.137	5.58e-10	AHSA1,DNAJB1,HRH1,HSPA1A/HSPA1B,HSPA9,RPL30,RPS8,SCD,SOD2,STAT3,TNFAIP3
arsenic trioxide		chemical drug		0.819	2.21e-09	ATP1B1,ATP1B3,CD44,HMOX1,HSPE1,MT1E,MT1G,MT1X,MT2A,NCL,S100A8,SCD,STAT3,TNFAIP3,UQCRQ	77 (17)
pioglitazone		chemical drug		-1.473	8.46e-09	APOE,APP,CD36,CFD,FABP4,HMOX1,HPGD,KLF4,PLIN2,RBP4,SERPINB5,SOD2	87 (23)
poly rI:rC-RNA		biologic drug		-0.836	8.83e-09	APP,CAMP,CD36,CD44,DEFB1,HSPA9,HSPD1,IFI6,IL2RG,KLF4,LTA4H,MMP2,MSR1,NEDD9,OASL,RPL30,SERPING1,SOD2,THBS1,TNFAIP3	82 (20)
methylprednisolone		chemical drug		-0.282	1.25e-08	AKR1C3,ATP1B1,C1QB,CD36,CD44,CTSC,HMOX1,HSPA1A/HSPA1B,HSPH1,MGAT1,NCL,PLIN2,POR,PTPN1,RGCC,RND3,STAT3,TNFAIP3,WDR74
calcitriol		chemical drug		-0.393	1.41e-08	APP,CAMP,CD44,CFD,FABP4,FTL,HPGD,HSPA9,HSPD1,KLF4,LGALS1,NEDD9,NUPR1,POR,RGCC,S100A8,STAT3,THBS1,TNFAIP3	108 (22)
imatinib		chemical drug		-0.211	2.31e-08	APP,ATP1B1,ATP1B3,HMOX1,HSPE1,MT1E,MT1G,MT1X,MT2A,NCL,PLIN2,STAT3,TNFAIP3,UQCRQ	68 (11)
gentamicin		chemical drug		0	4.05e-08	ARF6,C1QB,CD63,HMOX1,HSPA1A/HSPA1B,HSPB1,LGALS1,MMP2,NCL,PLIN2,PTPN1,RBP4,RGCC,STAT3
motexafin gadolinium		chemical drug	Activated	2	8.37e-08	MT1E,MT1G,MT1X,MT2A
ponesimod		chemical drug		-1.342	1.02e-07	MT1E,MT1G,MT1X,MT2A,THBS1
tetradecanoylphorbol acetate		chemical drug		1.258	1.03e-07	AHSA1,APP,B3GNT5,CD36,CD44,CD52,HLA-DRA,HMOX1,HRH1,HSPA4,IGFBP2,IL2RG,JUND,KLF4,LRRFIP1,MMP2,MSR1,MT2A,PTPN1,RBPJ,S100A8,SOD2,STAT3,THBS1,TNFAIP3	72 (17)
decitabine		chemical drug		-0.094	1.63e-07	APOE,CD44,DAPK1,DEFB1,HPGD,HSPA1A/HSPA1B,HSPA9,IGFBP2,KLF4,LGALS1,MGST3,MMP2,PABPC1,PKP2,RPS27,RSF1,SDC2,SERPINB5,STAT3,THBS1	54 (7)
sirolimus		chemical drug		0.087	3.3e-07	APP,CD36,CFD,DPYSL2,HMOX1,HSPA4,HSPD1,MMP2,NCL,PLIN2,RPL30,RPL41,RPS12,RPS23,RPS27,RPS4Y1,RPS8,SCD	87 (19)
vancomycin		biologic drug		-0.095	8.63e-07	C1QB,CD44,CD63,HMOX1,LGALS1,MMP2,RBM3,SCD,SOD2,STAT3
curcumin		chemical drug		-0.745	1.4e-06	APOE,APP,CAMP,CD36,CD44,DAPK1,DNAJB1,FTL,HMOX1,HSPA1A/HSPA1B,JUND,MMP2,STAT3	61 (14)
LY294002		chemical drug		1.17	1.53e-06	AKR1C1/AKR1C2,APOE,CD36,CD44,HMOX1,IGFBP2,MMP2,MT2A,PDE4B,PTPN1,RND3,SCD,THBS1,TNFAIP3,TREM1	86 (20)
5-fluorouracil		chemical drug		-0.372	2.62e-06	AHSA1,CSTB,HMOX1,HSPE1,MT-ND3,NCL,RPL30,RPS12,RPS23,RPS4Y1,RPS8,THBS1
trovafloxacin		chemical drug		1.633	3.59e-06	HMOX1,PDE4B,SOD2,STAT3,THBS1,TNFAIP3	63 (11)
zinc oxide		chemical drug			4.11e-06	MT1E,MT1G,MT1X
triamcinolone acetonide		chemical drug		1.539	4.63e-06	CD44,CYTIP,MT1E,MT1G,MT1X,MT2A,RGCC,SCD,SOD2
ciprofibrate		chemical drug	Inhibited	-2.789	4.8e-06	CD36,CD63,CSTB,FABP4,IGFBP2,PLIN2,RBM3,SCD	79 (19)
ciprofloxacin		chemical drug		0.816	7.5e-06	APP,COLEC12,CTSA,HSPA9,HSPD1,MMP2,MSR1
troglitazone		chemical drug		-0.764	8.53e-06	CD36,CFD,CHCHD10,FABP4,HLA-DRA,HMOX1,KLF4,MSR1,MT1G,PLIN2,SCD,SERPINB5	83 (20)
GW501516		chemical drug		-0.046	1.04e-05	CAMP,CFD,IGFBP2,PLIN2,S100A8,SCD,THBS1	78 (17)
U0126		chemical drug		0.785	1.26e-05	CAMP,CD36,CD44,FABP4,HMOX1,HPGD,JUND,MMP2,PABPC1,RND3,SOD2,STAT3,THBS1,UBC	72 (16)
filgrastim		biologic drug		0	1.42e-05	CD44,CD52,HLA-DRA,HLA-DRB5,HPGD,HSPA9,IFI6,LST1,OASL,PDE4B,SAMHD1,SERPING1
4-hydroxytamoxifen		chemical drug		1.238	1.66e-05	DDX21,FABP4,MT1G,MT1X,MT2A,NEDD9,RBP4,TNFAIP3
lithium chloride		chemical drug		0.522	1.71e-05	APP,CD44,HMOX1,MMP2,MT1G,MT2A,PLIN2	85 (18)
alpha-tocopherol		chemical drug		1.953	1.92e-05	CD36,HMOX1,HSPA1A/HSPA1B,JUND	73 (15)
acetovanillone		chemical drug	Activated	2.176	1.94e-05	APP,HMOX1,MMP2,MSR1,SOD2	58 (14)
bexarotene		chemical drug		-1.947	2.42e-05	AKR1C1/AKR1C2,AKR1C3,APOE,APP,CFD,FABP4,MALAT1,SCD	68 (14)
quercetin		chemical drug		0.213	2.44e-05	CD44,CD63,CRIP1,DAPK1,HMOX1,KLF4,NEDD9,PLAC8,POR
cisplatin		chemical drug		0.577	3.29e-05	AKR1C1/AKR1C2,CD44,FABP4,HMOX1,IFI6,JUND,MMP2,MT1X,MT2A,RBM3,RBP4,S100A8,SERPINB5,STAT3,THBS1,TNFAIP3,YWHAZ	83 (19)
camptothecin		chemical drug		-1.066	3.32e-05	APOE,CTSL,HSPA1A/HSPA1B,HSPA4,HSPA9,HSPB1,HSPH1,LST1,NCL,PLAC8,PLIN2,PTPN1,SOD2,TNFAIP3	61 (10)
docosahexaenoic acid		chemical drug		-0.536	4.02e-05	APOE,APP,CD44,DPYSL2,HMOX1,HPGD,MMP2,SCD,THBS1	75 (17)
diclofenac		chemical drug		0.506	4.26e-05	APP,DNAJB1,HPGD,JUND,KLF4,SOD2
resveratrol		chemical drug		1.369	4.79e-05	APP,CD36,DAPK1,FABP4,HMOX1,JUND,MALAT1,MMP2,SERPINB5,SOD2	72 (19)
SP600125		chemical drug		-0.412	5.14e-05	AKR1C3,APOE,CD44,HMOX1,NEDD9,NUPR1,SCD,SOD2,THBS1,TNFAIP3	80 (16)
genistein		chemical drug		-0.709	5.48e-05	AKR1C3,CD44,CFD,CTSA,CTSL,HMOX1,HPGD,HSPA1A/HSPA1B,JUND,MMP2,SOD2	75 (20)
mesalamine		chemical drug			5.7e-05	HMOX1,HPGD,SOD2	55 (15)
ST1926		chemical drug		-1.134	5.73e-05	ARPC2,LGALS1,MGST1,PABPC1,RPL41,RPS27,YWHAZ
indomethacin		chemical drug		-0.656	5.76e-05	APP,CD44,FABP4,FGF18,HMOX1,MMP2,PLIN2,RBM3,S100A8	78 (19)
caffeic acid phenethyl ester		chemical drug		-1.082	5.8e-05	CD44,FTL,HMOX1,HSPB1,MMP2,STAT3	80 (16)
deferoxamine		chemical drug		-1.068	7.5e-05	APP,CAMP,FGF18,HMOX1,HSPA1A/HSPA1B,IFI6,IGFBP2,MMP2	65 (14)
interferon beta-1a		biologic drug			0.000102	DNAJB1,HLA-DRB5,IFI6,LGALS1,RPS27,SERPING1	21 (3)
isoproterenol		chemical drug		-1.611	0.000149	APP,HMOX1,MMP2,MOGAT1,PLIN2,SCD,SOD2	77 (19)
doxorubicin		chemical drug		-0.84	0.000151	APP,CD44,HMOX1,HSPH1,MMP2,MT-ND3,RBM3,S100A8,SDC2,SERPINB5,SOD2,STAT3	80 (17)
streptozocin		chemical drug		-1.154	0.000195	ATP1B1,FABP4,HMOX1,HSPD1,MMP2,MSR1,SCD,SOD2,UBC	76 (19)
Y 27632		chemical drug		-1	0.000196	CD44,DPYSL2,FABP4,MMP2,THBS1	85 (20)
methapyrilene		chemical drug		1.342	0.000199	APOE,CD36,HMOX1,RPS8,SCD,YWHAZ
sildenafil		chemical drug		1.067	0.000209	APP,HMOX1,HSPD1,HSPE1	56 (7)
(-)-isoproterenol		chemical drug			0.000211	CD44,MMP2	23 (7)
etodolac		chemical drug			0.000211	CD36,THBS1
tacrolimus		chemical drug		1.406	0.000214	APP,CD36,DAPK1,FABP4,HSPD1,PLIN2,SAMHD1,SOD2	91 (20)
propofol		chemical drug			0.000227	HMOX1,MMP2,SOD2,THBS1	70 (19)
mifepristone		chemical drug		1.765	0.000227	APOE,C1QB,HPGD,HSPA4,HSPD1,KLF4,PELI1,SERPING1,STXBP2	46 (5)
SB203580		chemical drug		1.133	0.000242	CAMP,HMOX1,JUND,MMP2,PDE4B,RBM3,SERPING1,SOD2,THBS1,TMEM52B,TREM1	73 (19)
CD 437		chemical drug		-0.378	0.000245	ARPC2,FTL,LGALS1,MGST1,PABPC1,RPS27,YWHAZ
ciglitazone		chemical drug		-1	0.000278	APOE,CD36,HLA-DRA,IGFBP2,MMP2,SCGB1A1	88 (23)
adavosertib		chemical drug		0.507	0.00028	COLEC12,OASL,SERPING1,THBS1,TNFAIP3
ibuprofen		chemical drug		-0.48	0.000284	APP,CD36,MMP2,PLIN2	84 (17)
aspirin		chemical drug		1.633	0.000292	APP,FGF18,HPGD,IGFBP2,MMP2,SERPINB5,THBS1	66 (16)
cis-urocanic acid		chemical drug			0.000295	AKR1C1/AKR1C2,HSPA1A/HSPA1B,TNFAIP3
halofuginone		chemical drug			0.000299	CD44,HSPA4,LGALS1,MMP2,POR,RGCC
roscovitine		chemical drug			0.000305	APP,CD44,CD63,FABP4	58 (10)
ziritaxestat		chemical drug	Activated	2	0.000305	AKR1C1/AKR1C2,AKR1C3,HMOX1,OASL
fenofibrate		chemical drug		-1.848	0.000317	APP,CD36,FABP4,HMOX1,POR,SCD,SOD2,STAT3	79 (21)
fluocinolone acetonide		chemical drug		1	0.000376	JUND,MT1E,MT1X,RGCC
amiodarone		chemical drug			0.000376	HMOX1,HSPD1,SCD,SOD2
losartan potassium		chemical drug		1.561	0.000435	APP,CD36,MMP2,RBP4,S100A8,STAT3	72 (20)
carbamazepine		chemical drug		1	0.000458	DNAJB1,JUND,SOD2,STAT3
colistin		biologic drug		0.447	0.000502	C1QB,CD63,LGALS1,MMP2,STAT3
kanamycin A		chemical drug		0.447	0.000546	C1QB,CD63,LGALS1,MMP2,STAT3
H89		chemical drug		0.969	0.000653	APP,HMOX1,MMP2,S100A8,SOD2,TREM1	81 (19)
dextran sulfate		chemical drug			0.000682	CD36,HMOX1,MMP2,MSR1,S100A8,SERPINB5,STAT3,THBS1	78 (20)
propylthiouracil		chemical drug			0.000709	AKR1C3,C1QB,LGALS1,MGST3,PKP2,SLC16A10,TRHDE
ethacrynic acid		chemical drug			0.000728	AKR1C1/AKR1C2,HMOX1
bisindolylmaleimide I		chemical drug		-0.776	0.000807	CD44,HMOX1,JUND,MMP2,SOD2	64 (16)
calphostin C		chemical drug		0.895	0.000823	CD36,MSR1,S100A8,SOD2	73 (17)
metronidazole		chemical drug		0.447	0.000869	C1QB,CD63,LGALS1,MMP2,STAT3
CpG oligonucleotide		chemical drug		0.059	0.000872	CD36,CD63,IFI6,MSR1,SOD2,THBS1	69 (19)
thioctic acid		chemical drug			0.000963	FABP4,HMOX1,MMP2,SOD2	70 (16)
BMS-690514		chemical drug			0.000997	HSPA4,HSPE1,HSPH1
valproic acid		chemical drug		1.463	0.00105	AKR1C3,CD36,CD44,HMOX1,JUND,MT1G,PSME4,SCD,STAT3,THBS1	72 (17)
bryostatin 1		chemical drug			0.00109	APP,CD44,IL2RG	36 (7)
gemfibrozil		chemical drug		-1.967	0.00123	APOE,APP,POR,SCD	52 (9)
clodronic acid		chemical drug			0.00129	CD36,HMOX1,MSR1	43 (9)
eicosapentenoic acid		chemical drug		-1.412	0.00136	APOE,CD36,CD44,HMOX1,PLIN2	74 (19)
asoprisnil		chemical drug			0.00139	IGFBP2,MT1G,RBP4
buthionine sulfoximine		chemical drug			0.00151	CD36,HMOX1,TNFAIP3	36 (7)
dydrogesterone		chemical drug			0.00154	AKR1C1/AKR1C2,AKR1C3
nelfinavir		chemical drug		-0.254	0.00162	FABP4,HMOX1,KLF4,NUPR1	15 (3)
aprepitant		chemical drug			0.00163	S100A8,SERPINB5,TNFAIP3
bleomycin		biologic drug		0.349	0.00173	APOE,FABP4,MMP2,OASL,RGCC,STAT3,THBS1	87 (17)
PLX5622		chemical drug		-0.447	0.00197	HLA-DRA,IL2RG,MALAT1,MMP2,NCL
captopril		chemical drug		0.152	0.00201	CD44,HMOX1,RBM3,SERPING1
carvedilol		chemical drug			0.00216	APP,HMOX1,MMP2	67 (13)
zinc		chemical drug		0.28	0.00218	HMOX1,MT2A,PDE4B,SCD	82 (16)
2-(p-hydroxyanilino)-4-(p-chlorophenyl) thiazole		chemical drug			0.00225	APP,HMOX1
enalapril		biologic drug		0.762	0.00227	HMOX1,HSPB1,MMP2,SOD2	69 (19)
cerivastatin		chemical drug			0.00227	CD36,HMOX1,HSPB1,S100A8	77 (18)
cyclosporin A		biologic drug		0.952	0.0026	APOE,APP,CAMP,CD44,HMOX1,HSPD1,MMP2,RBM3,SCD	71 (16)
phytohemagglutinin		chemical drug		1.026	0.00261	APP,CD44,HPGD,IL2RG,MT1E,PTPN1,STAT3	65 (14)
racemic flurbiprofen		chemical drug			0.00264	APP,HPGD
midostaurin		chemical drug			0.00264	CD36,HMOX1	68 (13)
imiquimod		chemical drug		-0.283	0.00281	HMOX1,OASL,PELI1,S100A8,SOD2,UBC	39 (8)
wortmannin		chemical drug		1.407	0.00281	CD36,CD44,HMOX1,MMP2,MSR1,MT2A	71 (18)
hydroxyurea		chemical drug		0	0.00285	IFI6,KLF4,OASL,TNFAIP3	18 (3)
(+)-MK-801		chemical drug		1.091	0.00296	APP,HSPA1A/HSPA1B,JUND,STAT3
tazemetostat		chemical drug		0.378	0.00306	CD44,HSPA9,KLF4,LGALS1,RSF1,SDC2,STAT3
nandrolone		chemical drug			0.00307	HMOX1,SOD2
diethylstilbestrol		chemical drug		-0.306	0.00312	DPYSL2,IGFBP2,KLF4,LGALS1,MMP2,S100A8,SERPINB5
Ro31-8220		chemical drug			0.00314	FABP4,HMOX1,MMP2	69 (15)
17-alpha-ethinylestradiol		chemical drug		-0.447	0.00316	ADGRE5,APOE,C1QB,C1QC,SERPINB5
cyclophosphamide		chemical drug		1.067	0.00353	CD44,LGALS1,RBM3,THBS1
cetuximab		biologic drug			0.00353	HSPB1,STAT3	20 (3)
geranylgeranylacetone		chemical drug			0.00353	HSPH1,STAT3
naltrindole		chemical drug			0.00353	IGFBP2,UBC
S-equol		chemical drug			0.00353	HMOX1,MMP2
SB 216763		chemical drug			0.00372	FGF18,RND3,SCD
tyrphostin AG490		chemical drug		-1.067	0.00391	AKR1C3,HPGD,SOD2,STAT3	17 (3)
epigallocatechin-gallate		chemical drug		-0.184	0.00396	APP,HMOX1,JUND,MMP2,RBP4,STAT3	80 (21)
ferric ammonium citrate		chemical drug			0.00402	FTL,HMOX1	18 (4)
indinavir		chemical drug			0.00402	CD36,FABP4	74 (13)
acyline		biologic drug			0.00404	RPL30,RPS23,RPS4Y1,RPS8
bezafibrate		chemical drug		-0.48	0.00404	APOE,CD36,FABP4,SCD	79 (18)
androgen		chemical drug			0.00416	AKR1C3,CD44,IGFBP2,PTPN1,STAT3
olanzapine		chemical drug		1	0.00417	HLA-DRB5,HMOX1,IGFBP2,S100A8
simvastatin		chemical drug		1.324	0.0042	APOE,APP,HMOX1,KLF4,MMP2,SOD2	58 (14)
alitretinoin		chemical drug		-0.166	0.00426	APP,CD36,FABP4,HLA-DRA,SCD	75 (17)
acetaminophen		chemical drug		-0.057	0.00428	FTL,HMOX1,HSPD1,MGST1,PTPN1,YWHAZ	17 (2)
ruxolitinib		chemical drug			0.00435	CD44,MSR1,STAT3	36 (7)
prednisolone		chemical drug		0	0.00445	APOE,APP,DAPK1,SDC2,SOD2,TNFAIP3	39 (10)
lenalidomide		chemical drug		-0.816	0.00445	C2orf68,IFI6,KIF16B,KLF4,PVR,YWHAZ	6 (2)
baicalein		chemical drug			0.00458	APOE,HMOX1,MMP2	62 (17)
trans-hydroxytamoxifen		chemical drug		-0.447	0.00479	APOE,CTSL,MMP2,RBPJ,RND3
5-azacytidine		chemical drug		0.625	0.00479	CD44,HSPD1,IFI6,KLF4,THBS1
artemether		chemical drug			0.00597	MMP2
bapineuzumab		biologic drug			0.00597	APP
levocetirizine		chemical drug			0.00597	MMP2
bovine testicular hyaluronidase		biologic drug			0.00597	CD44
aleplasinin		chemical drug			0.00597	APP
acetylcholinesterase inhibitor		chemical drug			0.00597	APP
CHF 5074		chemical drug			0.00597	APP
regorafenib		chemical drug			0.00597	STAT3
LY2811376		chemical drug			0.00597	APP
ginsenoside Rg3		biologic drug			0.00597	APP
sphingosine kinase inhibitor V		chemical drug			0.00597	APP
BMS-275183		chemical drug			0.00597	THBS1
4-hydroxybutanoic acid		chemical drug			0.00597	APP
pantoprazole		chemical drug			0.00597	HMOX1
IC261		chemical drug			0.00597	APP
nalidixic acid		chemical drug			0.00597	DPYSL2
2-((4-(2-hydroxypropan2-yl)phenyl)amino)-1H-benzo[d]imidazole-6-carbonitrile		chemical drug			0.00597	APP
hydrocortisone phosphate		chemical drug			0.00597	APOE
MK-0812		chemical drug			0.00597	CD44
luteolin		chemical drug			0.00609	HMOX1,MMP2,SOD2	77 (20)
napabucasin		chemical drug			0.00665	CD44,KLF4,STAT3
N-acetyl-L-cysteine		chemical drug		0.936	0.00741	CD36,HLA-DRA,HMOX1,MMP2,MSR1,SOD2	70 (19)
mevastatin		chemical drug			0.00756	APOE,KLF4
geldanamycin		chemical drug		-1.446	0.0079	AHSA1,DNAJB1,HLA-DRA,HSPA1A/HSPA1B,HSPD1,SLC16A10	17 (3)
Go 6976		chemical drug			0.00852	HMOX1,MMP2,SOD2	67 (17)
vorinostat		chemical drug		-0.928	0.0087	CAMP,HLA-DRB5,HPGD,KLF4,MMP2,S100A8	97 (16)
estrogen		chemical drug		-1.342	0.00883	APOE,HSPH1,IGFBP2,LGALS1,SCGB1A1,STAT3	33 (4)
prexasertib		chemical drug			0.00885	HMOX1,KLF4,TNFAIP3
valsartan		chemical drug			0.00885	APP,FABP4,MMP2	74 (20)
staurosporine		chemical drug			0.00904	APP,HMOX1,MMP2,NEDD9	70 (18)
alvespimycin		chemical drug			0.0097	HSPA1A/HSPA1B,SCD
semaxinib		chemical drug			0.00998	C1QB,C1QC,HMOX1,THBS1	74 (13)
dipyridamole		chemical drug			0.0105	HMOX1,MMP2
GLP-1-(7-34)-amide		biologic drug			0.0105	HMOX1,STAT3
Sb202190		chemical drug		0.686	0.0105	CAMP,HMOX1,MMP2,S100A8
sulindac sulfide		chemical drug			0.011	APP,SERPINB5,STAT3
tetracycline		chemical drug			0.011	HSPD1,PDE4B,SOD2
sodium arsenite		chemical drug			0.011	FABP4,HMOX1,HSPA4
silibinin		chemical drug			0.0114	CD44,KLF4,MMP2
AGN194204		chemical drug		-1.4	0.0116	FABP4,LGALS1,PLAC8,PLIN2,SCD
ritonavir		chemical drug			0.0118	CD36,FABP4,MT1G,SCD
tegafur		chemical drug			0.0119	POR
gentamicin C1		chemical drug			0.0119	CD44
clofazimine		chemical drug			0.0119	PLIN2
AGRO 100		chemical drug			0.0119	NCL
lynestrenol		chemical drug			0.0119	APOE
nexrutine		chemical drug			0.0119	STAT3
gimeracil		chemical drug			0.0119	POR
BMS-863233		chemical drug			0.0119	STAT3
diflunisal		chemical drug			0.0119	APP
KRP-297		chemical drug			0.0119	FABP4
fomivirsen		biologic drug			0.0119	PVR
fenoprofen		chemical drug			0.0119	APP
heme arginate		chemical drug			0.0119	HMOX1
trandolapril		chemical drug			0.0119	APP
entolimod		biologic drug			0.0121	HMOX1,TNFAIP3
ursolic acid		chemical drug			0.0127	MMP2,SOD2,STAT3
GW7647		chemical drug			0.0129	IGFBP2,PLIN2
gemcitabine		chemical drug			0.0131	HLA-DRA,HMOX1,MMP2
capsaicin		chemical drug			0.0131	APP,HMOX1,MMP2
sulforafan		chemical drug		-0.943	0.0135	AKR1C1/AKR1C2,CD44,FTL,HMOX1
vitamin E		chemical drug			0.0135	CD36,CD44,MMP2
paclitaxel		chemical drug		1.179	0.0141	CD44,JUND,RBM3,SOD2,STAT3,THBS1
rifampin		chemical drug			0.0147	AKR1C1/AKR1C2,CD36,MT1G,SCD
trans-cinnamaldehyde		chemical drug			0.0147	HMOX1,POR
mycophenolic acid		chemical drug			0.0149	CD63,SOD2,TNFAIP3
atorvastatin		chemical drug		1.213	0.0155	APOE,APP,CD36,HMOX1,MMP2
grape seed extract		chemical drug			0.0165	APP,HSPD1
hymecromone		chemical drug			0.0175	CD44,MMP2
nitrofurantoin		chemical drug	Activated	2	0.0177	APOE,HMOX1,RPS8,YWHAZ
arundic acid		chemical drug			0.0178	APP
D-4476		chemical drug			0.0178	APP
gliquidone		chemical drug			0.0178	FABP4
clobetasol		chemical drug			0.0178	CAMP
fluoroquinolone		chemical drug			0.0178	MMP2
SRT2104		chemical drug			0.0178	CD63
vistusertib		chemical drug			0.0178	HMOX1
cobimetinib		chemical drug			0.0178	CD44
3K3A-APC protein		biologic drug			0.0178	APP
navtemadlin		chemical drug			0.0178	SCGB1A1
LY3214996		chemical drug			0.0178	HMOX1
tianeptine		chemical drug			0.0178	DPYSL2
pinacidil		chemical drug			0.0178	APP
donepezil		chemical drug			0.0178	APP
silver nitrate		chemical drug			0.0178	HMOX1
(Ala9)-autocamtide-2		biologic drug			0.0178	MMP2
latanoprost		chemical drug			0.0178	MMP2
amphetamine		chemical drug			0.0183	HSPA4,STIP1,TNFAIP3
bardoxolone		chemical drug			0.0185	HMOX1,HSPA9
promegestone		chemical drug			0.0188	MT1X,MT2A,STAT3
methotrexate		chemical drug		-0.277	0.0189	C1QB,HMOX1,SCD,SERPING1,THBS1
methamphetamine		chemical drug		-1.109	0.0191	HMOX1,JUND,LGALS1,MMP2
desmopressin		biologic drug			0.0193	HSPA1A/HSPA1B,HSPH1,YWHAZ
green tea polyphenol		chemical drug			0.0195	HMOX1,MMP2
doxycycline		chemical drug			0.0199	HSPA1A/HSPA1B,MMP2,SOD2
lovastatin		chemical drug		-0.686	0.0202	APOE,DPYSL2,HMOX1,KLF4
sodium tungstate		chemical drug			0.0206	DPYSL2,SOD2
hydroxypropyl-beta-cyclodextrin		chemical drug			0.0215	APOE,CD44,STAT3
PC-SPES		chemical drug			0.0215	DNAJB1,FTL,MGST1
desipramine		chemical drug			0.0216	HMOX1,PDE4B
raloxifene		chemical drug		-1	0.0218	CTSL,HMOX1,HSPA1A/HSPA1B,MMP2
daidzein		chemical drug			0.0221	AKR1C3,APOE,HMOX1
cephaloridine		chemical drug			0.0227	HMOX1,HSPA1A/HSPA1B,HSPH1
bortezomib		chemical drug	Inhibited	-2.153	0.0229	DNAJB1,HSPA1A/HSPA1B,HSPE1,PVR,RBPJ
sofalcone		chemical drug			0.0237	HMOX1
CC8490		chemical drug			0.0237	SOD2
nintedanib		chemical drug			0.0237	RND3
AZD-1208		chemical drug			0.0237	CD44
GR-MD-02		chemical drug			0.0237	CD36
belumosudil		chemical drug			0.0237	STAT3
griseofulvin		chemical drug			0.0237	HMOX1
meclofenamic acid		chemical drug			0.0237	APP
fomepizole		chemical drug			0.0237	HMOX1
PK 11195		chemical drug			0.0237	APP
cromolyn		chemical drug			0.0237	APP
senexin B		chemical drug			0.0237	STAT3
pipoxolan		chemical drug			0.0237	MMP2
sertindole		chemical drug			0.0237	APP
vapreotide		biologic drug			0.0237	THBS1
myristoylated protein kinase C peptide inhibitor		biologic drug			0.0237	CD36
elcatonin		biologic drug			0.0237	MMP2
quinine		chemical drug			0.0237	HMOX1
tyrphostin AG 18		chemical drug			0.0237	AKR1C3
gemcabene		chemical drug			0.0237	APOE
rolipram		chemical drug			0.0238	PDE4B,PTPN1
parthenolide		chemical drug			0.0238	HMOX1,SOD2
epicatechin		chemical drug			0.0245	FABP4,PLIN2,S100A8
xanthohumol		chemical drug			0.0249	HMOX1,SCD
tetraethylammonium		chemical drug			0.0249	HSPA9,HSPB1
crizotinib		chemical drug			0.0261	SCD,SOD2
allopurinol		chemical drug			0.0263	CD44,HMOX1,RBM3
phenethyl isothiocyanate		chemical drug			0.027	MGST1,MGST3,MMP2
lisinopril		biologic drug			0.0272	MMP2,S100A8
medroxyprogesterone acetate		chemical drug		0.61	0.028	CD44,CFD,CTSL,SAMHD1,SCD,STAT3,THBS1
PP1		chemical drug			0.0284	HMOX1,MMP2
leuprolide		biologic drug			0.0284	APP,MMP2
gefitinib		chemical drug			0.0292	CTSA,FGF18,HMOX1,HSPB1
(+)-fluprostenol		chemical drug			0.0295	FABP4
ginsenoside Re		chemical drug			0.0295	FABP4
lunasin		biologic drug			0.0295	HMOX1
retaspimycin		chemical drug			0.0295	STAT3
edratide		biologic drug			0.0295	CD44
luminespib		chemical drug			0.0295	HSPA1A/HSPA1B
LY379196		chemical drug			0.0295	MSR1
amprenavir		chemical drug			0.0295	CD36
LFM-A13		chemical drug			0.0295	HMOX1
AD-5057		chemical drug			0.0295	FABP4
aurothiomalate		chemical drug			0.0295	HMOX1
lomefloxacin		chemical drug			0.0295	HMOX1
opioid		chemical drug			0.0295	HMOX1
entacapone		chemical drug			0.0295	MMP2
sodium phosphate		chemical drug			0.0295	MMP2
ampelopsin		chemical drug			0.0295	HMOX1
tiotropium		chemical drug			0.0295	MMP2
clofibrate		chemical drug			0.0296	CD36,HMOX1,SCD
black raspberry extract		chemical drug			0.0303	ARPC2,CD44,HMOX1
conjugated linoleic acid		chemical drug			0.0309	FABP4,LTA4H
memantine		chemical drug			0.0309	POR,STAT3
resiquimod		chemical drug			0.0318	CD44,HSPB1,OASL,SOD2,TNFAIP3
ribavirin		chemical drug			0.0321	IFI6,OASL
temozolomide		chemical drug			0.0334	MMP2,SOD2
omeprazole		chemical drug			0.0334	CD36,POR
herbimycin		chemical drug			0.0347	MMP2,SOD2
lumefantrine		chemical drug			0.0353	HSPB1
erismodegib		chemical drug			0.0353	MMP2
lestaurtinib		chemical drug			0.0353	SOD2
risedronic acid		chemical drug			0.0353	HSPD1
roflumilast		chemical drug			0.0353	PDE4B
aurintricarboxylic acid		chemical drug			0.0353	APP
zofenopril		chemical drug			0.0353	HMOX1
L-buthionine (SR)-sulfoximine		chemical drug			0.0353	HMOX1
CL 316243		chemical drug			0.036	CD36,SCD
eflornithine		chemical drug			0.036	APP,SOD2
fluvastatin		chemical drug			0.0373	APP,HMOX1
ibrutinib		chemical drug		0	0.0379	CD44,HSPD1,HSPE1,WDR74
PF543		chemical drug			0.0386	MT-TE,PLAC8
glucocorticoid		chemical drug		-0.152	0.0409	CD44,CRIP1,HMOX1,MT2A,SCGB1A1
PRN694		chemical drug			0.041	TNFAIP3
furosemide		chemical drug			0.041	APP
carboxyamido-triazole		chemical drug			0.041	MMP2
lansoprazole		chemical drug			0.041	APP
zonisamide		chemical drug			0.041	SOD2
alefacept		biologic drug			0.0428	AKR1C3,CD52
oblimersen		biologic drug			0.0428	IFI6,OASL
carbamylcholine		chemical drug			0.0428	APOE,APP
carboplatin		chemical drug			0.0428	CD44,RBM3
salirasib		chemical drug			0.0428	LGALS1,NCL
docetaxel		chemical drug			0.0456	CTSL,THBS1,YWHAZ
methylphenidate		chemical drug			0.0456	AHSA1,MALAT1
triamcinolone		chemical drug			0.0468	APOE
hesperidin		chemical drug			0.0468	HMOX1
ticrynafen		chemical drug			0.0468	HMOX1
antisense oligonucleotide		biologic drug			0.0468	APP
silmitasertib		chemical drug			0.0468	STAT3
tofogliflozin		chemical drug			0.0468	SCD
bisphosphonate		chemical drug			0.0468	STAT3
RO7051790		chemical drug			0.0468	YWHAZ
CHS-828		chemical drug			0.0468	CD44
exemestane		chemical drug			0.0468	HMOX1
salvianolic acid A		chemical drug			0.0468	HMOX1
saquinavir		chemical drug			0.0468	FABP4
copper sulfate		chemical drug			0.0468	HMOX1
leucine-2-alanine enkephalin		chemical drug			0.0468	APP
dihematoporphyrin ether		chemical drug			0.0468	HSPD1
dobutamine		chemical drug			0.0468	HMOX1
dimethyl sulfoxide		chemical drug			0.0481	HMOX1,JUND,NUPR1
tamoxifen		chemical drug	Activated	2.148	0.0535	CD36,FABP4,MMP2,SCD,SOD2

## Sheet: 2 (COPD vs ctl)
© 2000-2022 QIAGEN. All rights reserved.
Upstream Regulator	Expr Log Ratio	Molecule Type	Predicted Activation State	Activation z-score	p-value of overlap	Target Molecules in Dataset	Mechanistic Network
dexamethasone		chemical drug		-1.827	3.08e-27	ABCA1,ACOT7,ADAMTS2,ANPEP,AREG,BLVRB,C1QB,CD52,CD74,CFD,CRYBG1,CTSB,EEF1A1,FKBP5,FOXO3,FTL,HIF1A,HLA-DPA1,HLA-DPB1,HLA-DQB1,HLA-DRA,HLA-DRB1,HLA-DRB5,HMOX1,HSPH1,IFI6,IL10,IL1B,IL1RAP,INSR,JARID2,JUN,LDLR,LGALS2,LITAF,LY6E,MSR1,NFKBIA,NLRP3,PDK4,PELI1,PKP2,PPARD,PPARG,PSME1,RETN,RFX2,RNASE2,RPS23,S100A4,S100A8,S100A9,SERPINB9,SLC1A3,ST6GALNAC3,TNFAIP3,TXNIP,UBC,VCL,WARS1,ZBTB16	93 (23)
lipopolysaccharide		chemical drug		0.596	2.47e-25	ABCA1,APOBEC3A,AREG,C1QA,C1QC,CD14,CD163L1,CD74,CFD,CH25H,CTSB,DNAJB1,FCGR3A/FCGR3B,FNDC3A,HIF1A,HLA-DQA1,HLA-DQB1,HLA-DRB5,HMOX1,HSP90AA1,HSPA1A/HSPA1B,IFI6,IL10,IL1B,IL1RAP,INSR,JUN,LDLR,LITAF,LRRFIP1,LY6E,MAP4K4,MSR1,MT2A,NFKBIA,NLRP3,NOCT,PDK4,PELI1,PID1,PPARD,PPARG,PSME1,PTEN,PTPN2,RANBP2,RETN,RNASE2,S100A12,S100A8,S100A9,SERPINB9,SLC39A8,STAT3,TNFAIP3,TNFSF13B,TPST1,TXNIP,VAMP8,VCL,VSIG4,WA…	90 (22)
fluticasone propionate		chemical drug	Inhibited	-2.921	1.35e-19	C1QB,CD74,FKBP5,HLA-DPA1,HLA-DPB1,HLA-DQA1,HLA-DRA,IL10,IL1B,MT2A,PDK4,RNASE1,RNASE2,S100A8,SLC1A3,TNFSF13B,TPST1,VSIG4,WARS1
tetradecanoylphorbol acetate		chemical drug		-0.53	1.67e-18	ABCA1,APOBEC3A,AREG,CD14,CD52,CH25H,CTSB,FKBP5,HIF1A,HLA-DRA,HMOX1,IL10,IL1B,JUN,LDLR,LRRFIP1,MSR1,MT2A,MYO9B,NFKBIA,NLRP3,NOCT,PDK4,PPARD,PPARG,PRKCH,PTEN,PTPN1,RETN,S100A8,S100A9,SERPINB9,SLC39A8,STAT3,TNFAIP3,USP36,VCL,VSIG4	88 (23)
filgrastim		biologic drug		0	2.91e-16	CD52,CD74,CRYBG1,FKBP5,HLA-DPA1,HLA-DPB1,HLA-DQB1,HLA-DRA,HLA-DRB1,HLA-DRB5,IFI6,IL10,IL1RAP,JARID2,JUN,LDLR,LGALS2,NLRP3,PSME1,RNASE2,S100A4,SLC1A3,ST6GALNAC3
camptothecin		chemical drug		-1.349	1.49e-15	AREG,CRYBG1,EEF1A1,FNDC3A,HIF1A,HLA-DQA1,HLA-DQB1,HSP90AA1,HSPA1A/HSPA1B,HSPH1,IL10,IL1B,IL1RAP,JUN,LDLR,LITAF,MAP4K4,NFKBIA,NLRP3,PTEN,PTPN1,S100A12,SERPINB9,STK17B,TNFAIP3,VRK2	64 (18)
LY294002		chemical drug		0.964	4.9e-12	ABCA1,ANPEP,CD14,CD74,HIF1A,HLA-DRB1,HMOX1,IL10,IL1B,INSR,JUN,MT2A,NFKBIA,PPARD,PPARG,PTEN,PTPN1,PTPN2,RETN,TNFAIP3,ZBTB16	67 (17)
calcitriol		chemical drug		-0.396	6.86e-12	AREG,CD14,CFD,FOXO3,FTL,HIF1A,HSPD1,IL10,IL1B,JUN,NFKBIA,PDK4,PPARD,PPARG,PTEN,RNASE1,S100A8,S100A9,SERPINB9,STAT3,TNFAIP3,TXNIP,VCL	79 (21)
wortmannin		chemical drug	Activated	2.589	4.36e-11	ANPEP,CD14,HIF1A,HMOX1,IL10,IL1B,INSR,JUN,MSR1,MT2A,NFKBIA,PPARD,PTEN,RETN	83 (24)
streptozocin		chemical drug	Inhibited	-2.039	5.58e-11	ATF6,HIF1A,HMOX1,HSPD1,IL10,IL1B,INSR,MSR1,PDK4,PPARD,PPARG,PTEN,RETN,SLC1A3,TXNIP,UBC	70 (22)
trichostatin A		chemical drug		-0.307	1.91e-10	ABCA1,ACOT7,AREG,BLVRB,CD14,CTSB,FTL,HIF1A,HLA-DQB1,HLA-DRA,HLA-DRB1,HMOX1,IL10,IL1B,IL1RAP,LDLR,MAP4K4,MBNL1,MYO9B,NFKBIA,PPARG,PTEN,STAT3,TXNIP,VCL	73 (21)
rosiglitazone		chemical drug	Inhibited	-3.047	4.86e-10	ABCA1,C1QA,C1QB,C1QC,CFD,HLA-DRA,HMOX1,IL10,IL1B,INSR,MSR1,PDK4,PPARG,PTEN,PTPN1,RETN,S100A8,S100A9	61 (20)
U0126		chemical drug		0.186	5.99e-10	APOBEC3A,AREG,EEF1A1,FKBP5,HIF1A,HLA-DQA1,HMOX1,IGHA1,IL10,IL1B,IL1RAP,JUN,LDLR,PPARD,PPARG,RETN,S100A9,STAT3,UBC	72 (20)
mifepristone		chemical drug		-0.15	6.88e-10	AREG,C1QB,CD14,CD74,FKBP5,HLA-DQB1,HSPD1,IL10,IL1B,JUN,LDLR,NFKBIA,NPL,PELI1,RFX2	69 (23)
doxorubicin		chemical drug		-1.6	2.4e-09	AREG,CD14,CTSB,EEF1A1,FOXO3,HIF1A,HMOX1,HSP90AA1,HSPH1,IL1B,JUN,NFKBIA,NLRP3,PTEN,RETN,S100A8,S100A9,STAT3	64 (18)
4-hydroxytamoxifen		chemical drug		0.784	6.49e-09	AREG,IL10,JUN,MT2A,NFKBIA,PDK4,PRKCH,S100A9,SERPINB9,SLC39A8,TNFAIP3	68 (20)
gentamicin		chemical drug		-1.229	1.25e-08	C1QA,C1QB,CTSB,EEF1A1,HMOX1,HSP90AA1,HSPA1A/HSPA1B,IL10,IL1B,JUN,LITAF,PTPN1,ST6GALNAC3,STAT3	31 (7)
genistein		chemical drug		-0.093	1.37e-08	AP1S2,CD74,CFD,CTSB,HIF1A,HLA-DQA1,HMOX1,HSPA1A/HSPA1B,IL10,IL1B,JUN,LDLR,PPARG,PTEN,STK17B	57 (19)
gamma-tocotrienol		chemical drug		0.212	2.65e-08	IL1B,JUN,NFKBIA,NLRP3,TNFAIP3	53 (15)
interferon beta-1a		biologic drug			2.76e-08	DNAJB1,HLA-DPB1,HLA-DRB5,IFI6,NFKBIA,PSME1,S100A12,S100A9,TNFSF13B
promegestone		chemical drug		1.532	4.82e-08	AREG,FKBP5,MT2A,NFKBIA,PDK4,STAT3,TXNIP,ZBTB16	58 (13)
H89		chemical drug		0.83	5e-08	ABCA1,AREG,CD14,HMOX1,IL10,IL1B,JUN,NFKBIA,PPARD,S100A8	73 (24)
curcumin		chemical drug		-1.468	7.29e-08	ABCA1,DNAJB1,FTL,HIF1A,HMOX1,HSPA1A/HSPA1B,IL10,IL1B,JUN,NFKBIA,PPARG,PTEN,RETN,STAT3	66 (17)
SP600125		chemical drug		-0.133	7.3e-08	ABCA1,AREG,ATF6,HMOX1,IL10,IL1B,JUN,LDLR,LGALS2,NFKBIA,PPARG,RETN,TNFAIP3	73 (25)
topotecan		chemical drug		-0.082	8.32e-08	CD14,HIF1A,HLA-DQA1,HSPA1A/HSPA1B,HSPD1,IL10,IL1B,JUN,KCNMA1,NFKBIA,TNFAIP3,VCL,XPO6	52 (13)
trovafloxacin		chemical drug		0.378	1.01e-07	HMOX1,LDLR,NFKBIA,PTEN,PTPN2,STAT3,TNFAIP3	63 (11)
methylprednisolone		chemical drug		-0.125	1.01e-07	ANPEP,C1QB,CD74,HMOX1,HSPA1A/HSPA1B,HSPH1,IGHA1,IL10,IL1B,JUN,LDLR,NFKBIA,PTPN1,SERPINB9,STAT3,TNFAIP3,WDR74	83 (23)
prednisolone		chemical drug		1.687	1.71e-07	CTSB,FKBP5,HIF1A,HSP90AA1,IL10,IL1B,INSR,PTEN,TNFAIP3,TXNIP,ZBTB16	70 (16)
paclitaxel		chemical drug		-0.661	2.63e-07	APOBEC3A,AREG,FOXO3,HIF1A,IGHA1,IL10,IL1B,IL1RAP,JUN,NFKBIA,S100A9,STAT3	69 (20)
poly rI:rC-RNA		biologic drug		0.555	3.52e-07	ABCA1,CD14,CD74,HIF1A,HSPD1,IFI6,IL10,IL1B,JUN,LY6E,MSR1,NFKBIA,NLRP3,PTPN2,RPL30,TNFAIP3,TNFSF13B	76 (19)
entolimod		biologic drug		1.98	4.01e-07	HMOX1,IL10,IL1B,NFKBIA,TNFAIP3	32 (7)
cyclosporin A		biologic drug		0	4.67e-07	CD14,FKBP5,HIF1A,HMOX1,HSP90AA1,HSPD1,IL10,IL1B,JUN,LDLR,NFKBIA,PRKCH,PTEN,S100A9	63 (18)
GW501516		chemical drug		-0.806	4.7e-07	ABCA1,CFD,IL1B,PDK4,PPARD,PTEN,S100A8,S100A9	55 (19)
sirolimus		chemical drug		-0.013	4.89e-07	CFD,EEF1A1,FOXO3,HIF1A,HMOX1,HSP90AA1,HSPD1,IL10,IL1B,INSR,JUN,NLRP3,PPARD,PPARG,RPL30,RPS23,S100A4	68 (21)
N-acetyl-L-cysteine		chemical drug		0.277	4.99e-07	FOXO3,HIF1A,HLA-DRA,HMOX1,IL10,IL1B,JUN,MSR1,NFKBIA,NLRP3,TXNIP	71 (20)
geldanamycin		chemical drug		-1.793	5.73e-07	DNAJB1,EEF1A1,FKBP5,HIF1A,HLA-DQA1,HLA-DRA,HSP90AA1,HSPA1A/HSPA1B,HSPD1,JUN,NLRP3	60 (15)
resiquimod		chemical drug		0.774	6.78e-07	APOBEC3A,ATF6,IL10,IL1B,JUN,KCNMA1,NFKBIA,NLRP3,TNFAIP3,TNFSF13B,WARS1	52 (16)
estrogen		chemical drug		1.46	7.25e-07	ABCA1,AREG,HIF1A,HSPH1,IL10,IL1B,JUN,LDLR,PTEN,SERPINB9,STAT3	78 (24)
berberine		chemical drug		1.457	9.92e-07	HIF1A,HMOX1,IL10,IL1B,INSR,LDLR,PPARD,PPARG	70 (19)
semaxinib		chemical drug		0.378	1.05e-06	C1QA,C1QB,C1QC,HIF1A,HMOX1,IL1B,NFKBIA,NLRP3	73 (19)
eicosapentenoic acid		chemical drug	Inhibited	-2.045	1.05e-06	HMOX1,IL10,IL1B,IL1RAP,JUN,LDLR,PDK4,PPARG	65 (21)
glucocorticoid		chemical drug		-0.217	1.33e-06	CD74,FNDC3A,HMOX1,IL10,IL1B,INSR,MT2A,NFKBIA,PPARG,TXNIP,ZBTB16	83 (21)
acetaminophen		chemical drug		-0.121	1.51e-06	ACOT7,BLVRB,FTL,HIF1A,HMOX1,HSPD1,IL1B,JUN,PPARG,PTPN1	57 (15)
diclofenac		chemical drug		-0.16	1.93e-06	AREG,ATF6,DNAJB1,HIF1A,IL10,JUN,WARS1	58 (17)
triamcinolone acetonide		chemical drug		1.021	2.23e-06	CRYBG1,FKBP5,FOXO3,JUN,LDLR,MT2A,NFKBIA,TXNIP,ZBTB16	37 (7)
verapamil		chemical drug		0.128	2.34e-06	HLA-DPA1,HLA-DRA,IL1B,JUN,LDLR,TXNIP	79 (23)
cisplatin		chemical drug		-1.007	2.64e-06	ANPEP,CD14,CTSB,HIF1A,HMOX1,IFI6,IL1B,JUN,MT2A,NFKBIA,PDK4,PTEN,S100A8,S100A9,STAT3,STK17B,TNFAIP3,TXNIP	68 (18)
arsenic trioxide		chemical drug		0.059	2.87e-06	ATF6,BLVRB,HIF1A,HMOX1,MT2A,NFKBIA,PPARG,PTEN,S100A8,STAT3,TNFAIP3	61 (17)
resveratrol		chemical drug		-1.582	3.48e-06	CD14,FOXO3,HIF1A,HMOX1,IL1B,JUN,LDLR,LITAF,NFKBIA,PDK4,PPARG	74 (22)
troglitazone		chemical drug		0.034	3.49e-06	ABCA1,CFD,HLA-DRA,HMOX1,IL1B,JUN,MSR1,NFKBIA,PDK4,PPARG,PTEN,RETN	59 (19)
lisinopril		biologic drug		-0.44	3.67e-06	IL1B,JUN,LDLR,S100A8,S100A9	57 (11)
indomethacin		chemical drug		-0.683	3.93e-06	CD14,HIF1A,HMOX1,IL10,IL1B,INSR,LDLR,PPARD,PPARG,S100A8	69 (20)
sodium arsenite		chemical drug		-1.557	4.09e-06	FKBP5,HIF1A,HMOX1,JUN,LITAF,PPARG	65 (16)
N-nitro-L-arginine methyl ester		chemical drug		0.928	4.66e-06	HIF1A,HMOX1,IL1B,LDLR,NFKBIA,PDK4,PPARD	71 (22)
SB203580		chemical drug		0.094	4.68e-06	AREG,ATF6,HIF1A,HMOX1,IL10,IL1B,JUN,NFKBIA,PPARD,PPARG,RETN,SERPINB9,STK17B	60 (19)
fasudil		chemical drug		-0.776	5.16e-06	CD14,IL10,IL1B,JUN,SLC1A3	60 (21)
fulvestrant		chemical drug		-0.692	5.33e-06	AREG,CD74,IL1B,JUN,LDLR,PPARG,PTEN,SERPINB9,STAT3,TXNIP	72 (21)
metformin		chemical drug		1.144	5.33e-06	ABCA1,ATF6,HIF1A,HMOX1,IL10,IL1B,INSR,NFKBIA,RETN,TXNIP	80 (21)
vorinostat		chemical drug	Inhibited	-2.353	5.5e-06	CD74,HLA-DQB1,HLA-DRB5,IL10,IL1B,JUN,LDLR,NFKBIA,S100A8,S100A9	79 (22)
rottlerin		chemical drug		-0.372	8.34e-06	ABCA1,APOBEC3A,FKBP5,HMOX1,IL10,JUN	61 (21)
saracatinib		chemical drug			8.74e-06	IL10,IL1B,NLRP3	34 (7)
epigallocatechin-gallate		chemical drug	Inhibited	-2.422	9.91e-06	FOXO3,HIF1A,HMOX1,IL10,IL1B,JUN,LDLR,NFKBIA,STAT3	69 (18)
cerivastatin		chemical drug			1.15e-05	HMOX1,INSR,JUN,PPARG,S100A8,S100A9	74 (22)
gefitinib		chemical drug		-0.152	1.27e-05	AREG,CTSB,HIF1A,HMOX1,IL1B,MAP4K4,PPARG,S100A9	77 (23)
ammonium trichloro(dioxoethylene-O,O'-)tellurate		chemical drug			1.31e-05	HLA-DQB1,IL10,IL1B	41 (7)
alpha-tocopherol		chemical drug		-0.152	1.35e-05	HMOX1,HSPA1A/HSPA1B,IL1B,PPARG	63 (18)
dextran sulfate		chemical drug		0.05	1.53e-05	CD14,CD74,HMOX1,IL10,IL1B,MSR1,NLRP3,S100A8,S100A9,STAT3	80 (20)
dichloroacetic acid		chemical drug		-0.152	1.57e-05	FOXO3,HIF1A,IL10,PDK4	40 (9)
dabrafenib		chemical drug			1.86e-05	IL10,IL1B,NLRP3	36 (7)
polymyxin B		biologic drug			1.86e-05	IL10,IL1B,LDLR	14 (3)
valproic acid		chemical drug		0.769	2.58e-05	ATF6,CH25H,CTSB,HIF1A,HMOX1,JUN,LDLR,PPARG,PSME1,PTEN,S100A4,STAT3	75 (19)
pioglitazone		chemical drug		-0.926	2.82e-05	ABCA1,CFD,HMOX1,IL1B,LDLR,PPARD,PPARG,RETN	57 (19)
vancomycin		biologic drug		-1.463	2.82e-05	C1QA,C1QB,CD14,CTSB,HMOX1,IL10,IL1B,STAT3	50 (7)
acyline		biologic drug			2.88e-05	EEF1A1,JUN,LDLR,RPL30,RPS23,ZBTB16
olanzapine		chemical drug		-0.816	3.03e-05	HLA-DRB5,HMOX1,IL1RAP,LDLR,S100A8,S100A9
2-deoxyglucose		chemical drug		-1.27	3.03e-05	HIF1A,IL1B,INSR,JUN,PPARG,TXNIP	69 (18)
caffeic acid phenethyl ester		chemical drug		-1.655	3.53e-05	CTSB,FTL,HMOX1,IL1B,NFKBIA,STAT3	74 (23)
deferoxamine		chemical drug		-0.54	4e-05	CD14,GAS7,HIF1A,HMOX1,HSPA1A/HSPA1B,IFI6,JUN,PPARG	66 (16)
vitamin D		chemical drug			4.1e-05	IL10,IL1B,INSR,NFKBIA,S100A8	53 (13)
green tea polyphenol		chemical drug		-1.951	4.37e-05	HMOX1,IL1B,JUN,PPARG	62 (20)
clodronic acid		chemical drug		-0.398	4.37e-05	HMOX1,IL10,IL1B,MSR1	49 (13)
prexasertib		chemical drug		0.447	4.4e-05	HMOX1,IL1B,NFKBIA,TNFAIP3,TXNIP	67 (15)
pravastatin		chemical drug		-0.057	5.03e-05	ABCA1,HMOX1,IL10,IL1B,LDLR	67 (21)
thioctic acid		chemical drug		-0.501	5.03e-05	HMOX1,IL10,JUN,PDK4,PPARD	67 (21)
androgen		chemical drug		1.982	5.3e-05	CTSB,FOXO3,JUN,NFKBIA,PTEN,PTPN1,STAT3	55 (12)
metronidazole		chemical drug		-0.816	5.98e-05	C1QA,C1QB,CTSB,IL10,IL1B,STAT3	50 (7)
atorvastatin		chemical drug		-0.368	6.24e-05	ABCA1,HMOX1,IL10,INSR,JUN,LDLR,PPARG,S100A12	62 (20)
rolipram		chemical drug		-1.067	6.67e-05	AREG,IL10,IL1B,PTPN1	60 (18)
gemfibrozil		chemical drug		1.264	6.91e-05	IL1B,LDLR,NFKBIA,PPARD,PPARG	79 (22)
CpG oligonucleotide		chemical drug		0.081	7.26e-05	ABCA1,CD14,IFI6,IL10,IL1B,MSR1,TNFSF13B	49 (16)
medroxyprogesterone acetate		chemical drug		-0.05	8.17e-05	CFD,CTSB,HIF1A,IL10,IL1B,JUN,NFKBIA,PPARG,STAT3,VCL,ZBTB16	71 (17)
clorgyline		chemical drug			8.47e-05	HIF1A,IL10,STAT3	60 (12)
nicotine		chemical drug		0.103	9.43e-05	HIF1A,HMOX1,IL10,IL1B,LDLR,LITAF,PPARD,STAT3	63 (19)
exenatide		biologic drug			9.75e-05	ABCA1,HMOX1,IL10,TXNIP	48 (13)
gemcitabine		chemical drug			9.85e-05	AREG,HIF1A,HLA-DRA,HMOX1,IL1B	73 (20)
tanespimycin		chemical drug		-1.664	0.0001	DNAJB1,HSPA1A/HSPA1B,JUN,RPL30,STAT3,TNFAIP3	67 (15)
decitabine		chemical drug		-1.103	0.000102	ABCA1,EEF1A1,HSPA1A/HSPA1B,HSPD1,IL1B,IL1RAP,LDLR,MAP4K4,MYO9B,NFKBIA,PKP2,PPARG,PTEN,STAT3,VCL	82 (25)
triclosan		chemical drug			0.000102	AREG,HMOX1,JUN
tacrolimus		chemical drug		-1.787	0.000116	AREG,CD74,FKBP5,HSPD1,IL10,IL1B,JUN,NFKBIA	73 (21)
mibolerone		chemical drug		-0.156	0.000122	CD74,FKBP5,HLA-DQA1,JUN,LDLR,PRKCH
ebselen		chemical drug			0.000122	HIF1A,HMOX1,IL1B	53 (17)
docosahexaenoic acid		chemical drug		-1.966	0.000132	ABCA1,FOXO3,HMOX1,IL10,IL1B,LDLR,PPARG,PTEN	60 (22)
Sb202190		chemical drug		1.55	0.000132	HIF1A,HMOX1,IL10,IL1B,LDLR,S100A8	70 (24)
zinc		chemical drug		0.513	0.000144	HMOX1,IL10,IL1B,MT2A,NFKBIA	41 (13)
ezetimibe		chemical drug			0.000149	ABCA1,CH25H,LDLR,PPARG	47 (16)
BAY 61-3606		chemical drug			0.00017	IL10,IL1B,NLRP3	38 (14)
cerulenin		chemical drug			0.00017	IL10,IL1B,PPARG	71 (15)
ciglitazone		chemical drug		-0.065	0.000172	ABCA1,HLA-DRA,IL10,NFKBIA,PPARG,PTEN	62 (22)
fenofibrate		chemical drug		-1.216	0.000173	HIF1A,HMOX1,JUN,LDLR,PDK4,RETN,STAT3,TXNIP	69 (22)
enoxaparin		chemical drug			0.000176	IL10,IL1B	14 (3)
cilostazol		chemical drug		-1.982	0.000188	ABCA1,ATF6,HMOX1,IL10	66 (22)
oridonin		chemical drug			0.000197	HMOX1,IL10,TNFSF13B	59 (11)
montelukast		chemical drug			0.000197	ANPEP,IL10,RNASE2
(+)-MK-801		chemical drug		1.378	0.000214	HSPA1A/HSPA1B,IL10,JUN,NFKBIA,STAT3	62 (17)
hydroxypropyl-beta-cyclodextrin		chemical drug		-1.4	0.000224	ABCA1,CTSB,IL1B,LDLR,STAT3	80 (21)
2-mercaptoacetate		chemical drug			0.00026	IL10,IL1B,PPARG	34 (7)
amiodarone		chemical drug			0.000268	HMOX1,HSPD1,LDLR,PPARG	55 (16)
bleomycin		biologic drug		0.219	0.000286	HIF1A,HSP90AA1,IL10,IL1B,PTEN,S100A4,STAT3,STK17B	71 (21)
eritoran		chemical drug			0.000293	IL10,IL1B	36 (9)
dexamethasone phosphate		chemical drug			0.000296	IL1B,NFKBIA,PDK4
17-alpha-ethinylestradiol		chemical drug		-0.41	0.000298	ADGRE5,C1QB,C1QC,CD74,JUN,LDLR
imiquimod		chemical drug		-1.106	0.000301	HMOX1,IL10,IL1B,PELI1,S100A8,S100A9,UBC	51 (17)
nitrofurantoin		chemical drug		0.816	0.000308	CTSB,EEF1A1,HMOX1,IL10,IL1B,NFKBIA
budesonide		chemical drug		-0.053	0.000312	AREG,HIF1A,IL10,IL1RAP,JUN,PELI1,S100A12,S100A9	62 (19)
tyrphostin AG490		chemical drug		0.391	0.00032	HIF1A,IL10,IL1B,RETN,STAT3	65 (18)
lovastatin		chemical drug		1.677	0.000372	ABCA1,HMOX1,IL10,IL1B,LDLR,PPARD	78 (21)
zinc sulfate		chemical drug			0.000378	HMOX1,IL10,IL1B	66 (18)
GLP-1-(7-34)-amide		biologic drug			0.000378	HMOX1,PPARG,STAT3	57 (18)
plicamycin		chemical drug		1.521	0.000379	ABCA1,FOXO3,HIF1A,HMOX1,UBC	49 (10)
seocalcitol		chemical drug	Activated	2	0.000395	AREG,LGALS2,PTEN,STAT3
raloxifene		chemical drug		-1.633	0.000434	AREG,HMOX1,HSPA1A/HSPA1B,JUN,LDLR,LITAF	50 (11)
afamelanotide		biologic drug			0.000438	PPARD,PPARG	32 (7)
dimethyl fumarate		chemical drug			0.000472	HMOX1,IL10,JUN	65 (16)
simvastatin		chemical drug		-0.13	0.000493	ABCA1,CD14,HMOX1,IL10,IL1B,LDLR,NFKBIA	64 (19)
trans-hydroxytamoxifen		chemical drug		0.186	0.000503	AREG,HIF1A,LITAF,PTEN,SERPINB9,WARS1	58 (7)
fingolimod		chemical drug		-1.506	0.00052	HLA-DQA1,HLA-DQB1,IL10,IL1B,PTEN	49 (14)
progestin		chemical drug			0.000524	NFKBIA,PDK4,TBC1D14
lenalidomide		chemical drug	Activated	2.611	0.000529	HLA-DPB1,HLA-DQA1,HLA-DRB1,IFI6,KCNMA1,PTEN,TNFSF13B
erlotinib		chemical drug		1.342	0.00054	AREG,CD14,IL1B,NFKBIA,PTEN	60 (18)
3,3'-diindolylmethane		chemical drug			0.000559	HMOX1,IL1B,NFKBIA,PTEN	51 (16)
coenzyme Q10		chemical drug			0.00058	HMOX1,IL10,IL1B
bardoxolone methyl		chemical drug			0.00058	HMOX1,IL10,IL1B	50 (16)
selumetinib		chemical drug		-0.147	0.00059	FOXO3,HIF1A,INSR,JUN	41 (7)
calphostin C		chemical drug		0.283	0.00059	LDLR,MSR1,PPARG,S100A8	70 (17)
Go 6976		chemical drug		1	0.00059	ABCA1,HMOX1,IL10,NFKBIA	62 (20)
quercetin		chemical drug		-1.132	0.000607	ABCA1,HIF1A,HMOX1,IL1B,JUN,LDLR,RFX2	73 (20)
PRN694		chemical drug			0.000611	NFKBIA,TNFAIP3
manidipine		chemical drug			0.000611	IL1B,JUN	51 (9)
imatinib		chemical drug		-0.351	0.000657	ATF6,FOXO3,HMOX1,IL1B,MT2A,STAT3,TNFAIP3,TNFSF13B	60 (21)
PLX5622		chemical drug		1.387	0.000722	AMPH,C1QC,CD14,HLA-DRA,IL1B,TNFSF13B
bexarotene		chemical drug		-1.673	0.000741	ABCA1,CFD,IL1B,PPARG,S100A9,VAMP8	64 (21)
BMS-690514		chemical drug			0.000771	HSP90AA1,HSPH1,PPARG
corticosteroid		chemical drug			0.000805	FKBP5,IL10,PPARG,STK17B	54 (12)
calcipotriene		chemical drug			0.000842	IL10,IL1B,JUN	61 (13)
ammonium chloride		chemical drug			0.000842	CTSB,IL1B,LDLR	66 (13)
verteporfin		chemical drug			0.000917	IL10,IL1B,NFKBIA	47 (12)
CFI-402257		chemical drug			0.000997	AREG,IL1B,S100A9	29 (6)
cicaprost		chemical drug			0.000997	HIF1A,IL10,IL1B	61 (7)
methyl-beta-cyclodextrin		chemical drug			0.000997	HIF1A,LDLR,PPARG	65 (19)
celecoxib		chemical drug		0.108	0.00101	HIF1A,HMOX1,IL1B,PPARD,PPARG	69 (19)
ibudilast		chemical drug			0.00104	IL10,IL1B	40 (7)
HG-9-91-01		chemical drug			0.00104	IL10,IL1B
ivermectin		chemical drug			0.00104	IL1B,NLRP3
sivelestat		chemical drug			0.00104	IL10,TNFSF13B
ruxolitinib		chemical drug		-1.067	0.00107	IL1B,MSR1,NLRP3,STAT3	39 (9)
capsaicin		chemical drug		-0.686	0.00107	HMOX1,IL1B,PPARD,PPARG	77 (23)
deferasirox		chemical drug			0.00108	GAS7,JUN,PPARG
linsidomine		chemical drug			0.00117	HMOX1,PPARD,PPARG	32 (8)
buthionine sulfoximine		chemical drug			0.00117	HMOX1,NFKBIA,TNFAIP3	35 (10)
desipramine		chemical drug			0.00126	HMOX1,IL10,IL1B	58 (20)
aprepitant		chemical drug			0.00126	S100A8,S100A9,TNFAIP3
nifedipine		chemical drug		0	0.00128	ABCA1,IL1B,INSR,LDLR	68 (22)
mycophenolic acid		chemical drug		0	0.00128	ANPEP,IL1B,LDLR,TNFAIP3	30 (6)
borage oil		chemical drug			0.00129	IL10,IL1B
alpelisib		chemical drug			0.00129	FOXO3,PTEN	30 (7)
pranlukast		chemical drug			0.00129	IL10,RNASE2
adapalene		chemical drug			0.00129	IL10,IL1B	16 (5)
ketorolac		chemical drug			0.00129	HIF1A,NFKBIA
etoposide		chemical drug		-0.656	0.00131	EEF1A1,HIF1A,IL10,IL1B,JUN,TNFAIP3	56 (17)
parthenolide		chemical drug			0.00136	HMOX1,IL1B,PDK4	64 (21)
laminaran		chemical drug			0.00136	IL1B,MT2A,SLC39A8
fludarabine		chemical drug			0.00146	HIF1A,HLA-DRB1,IL1B
PP2/AG1879 tyrosine kinase inhibitor		chemical drug		0.849	0.00151	HIF1A,HMOX1,IL10,IL1B	53 (17)
chloroquine		chemical drug		-1.958	0.00157	FOXO3,HIF1A,IL1B,TNFSF13B	63 (18)
ampicillin		chemical drug			0.00158	IL10,IL1B	59 (11)
fenretinide		chemical drug		-0.625	0.00177	HIF1A,IL1B,JUN,NFKBIA	63 (19)
PP1		chemical drug			0.00179	HMOX1,IL1B,JUN	60 (20)
LY-2510924		biologic drug			0.00188	CD14,S100A12
tyrphostin AG 1296		chemical drug			0.00188	CD14,JUN	27 (7)
resatorvid		chemical drug			0.00191	IL1B,MAP4K4,NLRP3
pentoxifylline		chemical drug			0.00191	IL10,IL1B,NFKBIA	55 (16)
thymoquinone		chemical drug			0.00204	CD14,HMOX1,IL10	54 (12)
PC-SPES		chemical drug			0.00214	DNAJB1,FTL,HSP90AA1,IL1B
chloropromazine		chemical drug			0.00217	IL10,IL1B,LDLR	50 (16)
aldesleukin		biologic drug			0.00217	FCGR3A/FCGR3B,HLA-DRA,HLA-DRB1
darapladib		chemical drug			0.00222	IL10,IL1B
SRT1720		chemical drug			0.00222	HIF1A,IL1B	49 (10)
pentylenetetrazol		chemical drug			0.00222	IL1B,JUN	37 (10)
cysteamine		chemical drug			0.00222	CTSB,HMOX1
mesalamine		chemical drug			0.00222	HMOX1,PPARG	50 (11)
cyclomaltodextrin		chemical drug			0.00222	IL1B,S100A8	28 (7)
daidzein		chemical drug		-0.152	0.00222	ABCA1,HLA-DQA1,HMOX1,LDLR	66 (22)
Ro31-8220		chemical drug			0.00244	HIF1A,HMOX1,IL1B	54 (19)
phenylephrine		chemical drug		-0.152	0.00248	ATF6,HMOX1,JUN,PDK4	65 (22)
GnRH analog		biologic drug		0.816	0.00253	ACOT7,HIF1A,HLA-DPB1,JUN,MYO9B,NFKBIA,VCL
beraprost		chemical drug			0.00258	IL10,IL1B
belnacasan		chemical drug			0.00258	IL1B,NLRP3
iron dextran		chemical drug			0.00258	IL1B,NFKBIA
sevoflurane		chemical drug			0.00258	HMOX1,IL1B	59 (17)
perilla alcohol		chemical drug			0.00258	IL1B,NFKBIA	35 (10)
actinomycin D		biologic drug	Activated	2.399	0.00261	ABCA1,HIF1A,HMOX1,JUN,PPARG,RETN	65 (18)
allopurinol		chemical drug		0.152	0.00284	CD14,HMOX1,IL1B,TXNIP	53 (17)
propofol		chemical drug			0.00289	CD14,HMOX1,IL1B	51 (15)
monophosphoryl lipid A		chemical drug			0.00297	IL10,IL1B	71 (22)
cetuximab		biologic drug			0.00297	HIF1A,STAT3
methoxsalen		chemical drug			0.00297	IL10,STAT3	45 (13)
geranylgeranylacetone		chemical drug			0.00297	HSPH1,STAT3
mimosine		chemical drug			0.00297	HLA-DQA1,HLA-DQB1
methotrexate		chemical drug		-0.618	0.00299	ABCA1,C1QB,HMOX1,IL1B,INSR,PPARD	71 (21)
colistin		biologic drug		0	0.00304	C1QA,C1QB,CTSB,STAT3
obeticholic acid		chemical drug			0.00306	IL10,IL1B,PPARG	60 (16)
ibuprofen		chemical drug			0.00306	HIF1A,IL1B,PPARG	70 (20)
alendronic acid		chemical drug			0.00306	FCGR3A/FCGR3B,IL10,IL1B	21 (6)
kanamycin A		chemical drug		0	0.00324	C1QA,C1QB,CTSB,STAT3
Ginkgo biloba		chemical drug			0.00338	IL1B,JUN	61 (16)
ferric ammonium citrate		chemical drug			0.00338	FTL,HMOX1	15 (3)
KT5720		chemical drug			0.00338	HMOX1,NFKBIA	41 (7)
acetovanillone		chemical drug			0.0034	HIF1A,HMOX1,MSR1	55 (7)
bortezomib		chemical drug		-0.132	0.00373	DNAJB1,HIF1A,HSP90AA1,HSPA1A/HSPA1B,IL10,IL1B	73 (23)
fluocinolone acetonide		chemical drug			0.00376	FKBP5,IL1B,ZBTB16
spironolactone		chemical drug		-1	0.0038	FKBP5,IL1B,KCNMA1,PPARG	24 (8)
digoxin		chemical drug			0.00381	HIF1A,PPARD
as605240		chemical drug			0.00381	IL10,IL1B	54 (13)
concanamycin A		chemical drug			0.00381	NFKBIA,PPARG	32 (7)
isoproterenol		chemical drug		-0.461	0.00394	HMOX1,IL10,IL1B,JUN,NLRP3	72 (20)
colchicine		chemical drug			0.00414	HIF1A,IL1B,JUN	74 (23)
potassium chloride		chemical drug			0.00416	IL1B,JUN,PTEN,TXNIP	73 (22)
misoprostol		chemical drug			0.00428	IL10,IL1B	61 (7)
WP1066		chemical drug			0.00428	HIF1A,IL1B	35 (7)
TGAL copolymer		biologic drug			0.00428	IL10,IL1B	34 (8)
vismodegib		chemical drug			0.00434	CD14,IL1B,PPARG
carrageenan		chemical drug			0.00455	IL1B,JUN,NFKBIA	59 (17)
5-fluorouracil		chemical drug		-1.633	0.00475	HMOX1,IL1B,JUN,PSME1,RPL30,RPS23,TXNIP	53 (18)
moxonidine		chemical drug			0.00476	ANPEP,INSR
clarithromycin		chemical drug			0.00476	IL10,IL1B	62 (18)
picropodophyllin		chemical drug			0.00476	HIF1A,ZBTB16
PS-1145		chemical drug			0.00476	NFKBIA,TNFAIP3	33 (8)
clenbuterol		chemical drug			0.00476	IL10,IL1B	47 (13)
n-3 fatty acids		chemical drug			0.00498	HMOX1,IL1B,PPARG	50 (18)
dacinostat		chemical drug			0.00527	HIF1A,IL10	63 (16)
ponesimod		chemical drug			0.00527	IL10,MT2A
ethyl pyruvate		chemical drug			0.00527	HMOX1,IL10	64 (21)
cannogenin thevetoside		chemical drug			0.00546	HIF1A
canakinumab		biologic drug			0.00546	IL1B
GDC-0879		chemical drug			0.00546	IL10
regorafenib		chemical drug			0.00546	STAT3
AZD8186		chemical drug			0.00546	PTEN
ShK-186 peptide		biologic drug			0.00546	IL10
minozac free base		chemical drug			0.00546	IL1B
erteberel		chemical drug			0.00546	IL1B
impromidine		chemical drug			0.00546	LDLR
pantoprazole		chemical drug			0.00546	HMOX1
leucyl-leucine-methyl ester		biologic drug			0.00546	IL1B
NCB-0846		chemical drug			0.00546	JUN
CD 437		chemical drug		-0.555	0.00554	FKBP5,FTL,HSP90AA1,JUN,NFKBIA
tranilast		chemical drug			0.00581	IL10,TXNIP
erythromycin		chemical drug			0.00581	IL10,IL1B	56 (15)
iloprost		chemical drug			0.00581	IL10,IL1B	77 (24)
neomycin		chemical drug			0.00637	IL10,IL1B	70 (23)
cis-urocanic acid		chemical drug			0.00637	HSPA1A/HSPA1B,TNFAIP3
INT-767		chemical drug			0.00637	IL10,IL1B	61 (7)
sulfasalazine		chemical drug			0.00637	IL1B,NFKBIA	43 (16)
lapatinib		chemical drug			0.00637	AREG,JUN	69 (17)
arecoline		chemical drug			0.00637	HMOX1,S100A4
butaprost		chemical drug			0.00637	IL10,IL1B	70 (13)
lithium chloride		chemical drug		-1.982	0.00649	HMOX1,IL10,MT2A,PPARG	69 (21)
mevastatin		chemical drug			0.00695	ABCA1,LDLR
MLN120B		chemical drug			0.00818	CTSB,IL1B	27 (7)
glyburide		chemical drug			0.00818	HMOX1,PPARG	40 (15)
retinol		chemical drug			0.00818	JUN,PPARD	41 (7)
sulindac sulfide		chemical drug			0.00868	AGTPBP1,PPARD,STAT3
tyrphostin AG 1478		chemical drug			0.00868	AREG,FOXO3,HIF1A	59 (13)
hemocyanin		biologic drug			0.00883	CD14,IL10
1-chloro-2,4-dinitrobenzene		chemical drug			0.00883	HMOX1,IL1B
pemetrexed		chemical drug			0.00883	CD14,IL1B
silibinin		chemical drug			0.00899	HIF1A,NFKBIA,RETN
K-252		chemical drug			0.0095	CD14,JUN	12 (3)
cannabidiol		chemical drug			0.0095	HIF1A,IL1B	27 (7)
enterotoxin B		biologic drug			0.00997	IL10,IL1B,TNFAIP3
ursolic acid		chemical drug			0.00997	IL1B,PPARG,STAT3	76 (20)
urtica dioica extract		chemical drug			0.0109	IL1B
BAY 87-2243		chemical drug			0.0109	IL10
AZ26		chemical drug			0.0109	IL1B
interferon gamma-1b		biologic drug			0.0109	IL10
epratuzumab		biologic drug			0.0109	IL10
CP-724,714		chemical drug			0.0109	VAMP8
alum compound		chemical drug			0.0109	IL1B
diaziquone		chemical drug			0.0109	IL1B
alvelestat		chemical drug			0.0109	IL10
lynestrenol		chemical drug			0.0109	ABCA1
potassium nitrate		chemical drug			0.0109	IL10
capmatinib		chemical drug			0.0109	AREG
nexrutine		chemical drug			0.0109	STAT3
ATB-346		chemical drug			0.0109	IL1B
fidarestat		chemical drug			0.0109	NLRP3
indotecan		chemical drug			0.0109	HIF1A
BMS-863233		chemical drug			0.0109	STAT3
P144		biologic drug			0.0109	IL10
amsacrine		chemical drug			0.0109	JUN
ephedrine		chemical drug			0.0109	IL10
amlexanox		chemical drug			0.0109	HIF1A
trichosanthin		chemical drug			0.0109	IL10
heme arginate		chemical drug			0.0109	HMOX1
echium oil		chemical drug			0.0109	IL1B
KT 5926		chemical drug			0.0109	CD14
cladribine		chemical drug			0.0109	IL1B
ciprofibrate		chemical drug		-1.412	0.0109	IL1RAP,NFKBIA,PDK4,PPARG
choline fenofibrate		chemical drug			0.0109	HIF1A,NFKBIA
KN-62		chemical drug			0.0109	IL1B,PPARG
tetrandrine		chemical drug			0.0109	IL1B,JUN
nelfinavir		chemical drug			0.011	CH25H,HMOX1,PPARG
propylthiouracil		chemical drug	Activated	2	0.0114	C1QB,JUN,PKP2,PTEN,TXNIP
tosedostat		chemical drug			0.0116	RETN,WARS1
romidepsin		biologic drug			0.0121	HIF1A,INSR,JUN
losartan potassium		chemical drug		-1.084	0.0121	IL1B,S100A8,S100A9,STAT3
vemurafenib		chemical drug			0.0124	IL10,IL1B
citarinostat		chemical drug			0.0124	TXNIP,USP36
silicon dioxide		chemical drug			0.0124	IL1B,JUN
paroxetine		chemical drug			0.0124	ABCA1,IL1B
estradiol benzoate		chemical drug			0.0125	INSR,OXSR1,PPARD
anakinra		biologic drug			0.0132	HMOX1,IL1B
shikonin		chemical drug			0.014	ABCA1,IL1B
amphetamine		chemical drug			0.0145	IL10,JUN,TNFAIP3
bryostatin 1		chemical drug			0.0148	AREG,IL1B
irbesartan		chemical drug			0.0157	IL1B,INSR
bardoxolone		chemical drug			0.0157	HMOX1,NFKBIA
alitretinoin		chemical drug		-0.949	0.0163	ABCA1,CD14,HLA-DRA,PPARG
sangivamycin		chemical drug			0.0163	JUN
pentosan polysulfate		chemical drug			0.0163	ABCA1
chlormethiazole		chemical drug			0.0163	IL1B
botulinum toxin type A		biologic drug			0.0163	S100A4
VX 702		chemical drug			0.0163	IL1B
vistusertib		chemical drug			0.0163	HMOX1
huo-luo-xiao-ling dan		chemical drug			0.0163	IL10
Zingiber officiale ginger extract		chemical drug			0.0163	IL1B
IPI-549		chemical drug			0.0163	IL10
LY3214996		chemical drug			0.0163	HMOX1
prinaberel		chemical drug			0.0163	IL1B
ketotifen		chemical drug			0.0163	IL10
TTI-101		chemical drug			0.0163	HIF1A
silver nitrate		chemical drug			0.0163	HMOX1
zunsemetinib		chemical drug			0.0163	IL1B
gamma tocopherol		chemical drug			0.0163	PPARG
3,4-methylenedioxyamphetamine		chemical drug			0.0163	JUN
aluminum		chemical drug			0.0163	IL1B
sulforafan		chemical drug		-0.836	0.0167	FTL,HIF1A,HMOX1,IL1B,NFKBIA
isoflurane		chemical drug			0.0174	HMOX1,IL10
hydroxyurea		chemical drug			0.0175	APOBEC3A,IFI6,TNFAIP3
cephaloridine		chemical drug			0.018	HMOX1,HSPA1A/HSPA1B,HSPH1
pitavastatin		chemical drug			0.0183	ABCA1,PPARG
eplerenone		chemical drug			0.0183	IL1B,PPARG
epicatechin		chemical drug			0.0189	IL1B,PPARG,S100A8
rosuvastatin		chemical drug			0.0192	HMOX1,LDLR
andrographolide		chemical drug			0.0192	HMOX1,IL1B
vinblastine		chemical drug			0.0192	HIF1A,IL1B
cyclophosphamide		chemical drug			0.0194	CD74,IL10,IL1B
carvedilol		chemical drug			0.0202	HMOX1,IL1B
etanercept		biologic drug			0.0211	FOXO3,IL1B
xanthohumol		chemical drug			0.0211	HMOX1,IL1B
thalidomide		chemical drug			0.0211	IL1B,KCNMA1
KIN001-043		chemical drug			0.0211	IL10,IL1B
sofalcone		chemical drug			0.0217	HMOX1
treprostinil		chemical drug			0.0217	IL1B
adalimumab		biologic drug			0.0217	IL10
NU-7026		chemical drug			0.0217	FKBP5
smectite		chemical drug			0.0217	IL1B
natriuretic peptide derivative		biologic drug			0.0217	PPARD
iron sucrose		chemical drug			0.0217	IL10
alirocumab		biologic drug			0.0217	LDLR
ONC-201		chemical drug			0.0217	IL1B
(+)-epicatechin		chemical drug			0.0217	IL1B
belumosudil		chemical drug			0.0217	STAT3
griseofulvin		chemical drug			0.0217	HMOX1
fomepizole		chemical drug			0.0217	HMOX1
glipizide		chemical drug			0.0217	INSR
cromolyn		chemical drug			0.0217	IL10
salsalate		chemical drug			0.0217	NFKBIA
sodium alum		chemical drug			0.0217	IL1B
senexin B		chemical drug			0.0217	STAT3
myristoylated protein kinase C peptide inhibitor		biologic drug			0.0217	PPARG
quinine		chemical drug			0.0217	HMOX1
mercaptopropionylglycine		chemical drug			0.0217	HIF1A
senicapoc		chemical drug			0.0217	IL1B
CHIR 99021		chemical drug			0.0221	IL10,PPARG
mitoxantrone		chemical drug			0.0221	HIF1A,IL1B
paricalcitol		chemical drug			0.0231	IL1B,NLRP3
clofibrate		chemical drug			0.0236	ABCA1,HMOX1,LDLR
conjugated linoleic acid		chemical drug			0.0262	IL10,PPARG
pembrolizumab		biologic drug			0.0262	HLA-DQA1,IL1B
memantine		chemical drug			0.0262	NFKBIA,STAT3
stallimycin		biologic drug			0.0262	IFI6,IL1B
(+)-fluprostenol		chemical drug			0.027	PPARG
CF102		chemical drug			0.027	HIF1A
lunasin		biologic drug			0.027	HMOX1
qing-fei-pai-du decoction		chemical drug			0.027	IL10
retaspimycin		chemical drug			0.027	STAT3
edratide		biologic drug			0.027	FOXO3
tylophorine		chemical drug			0.027	JUN
luminespib		chemical drug			0.027	HSPA1A/HSPA1B
colestimide		chemical drug			0.027	ABCA1
WAY 200070		chemical drug			0.027	JUN
astaxanthin		chemical drug			0.027	NLRP3
LY379196		chemical drug			0.027	MSR1
tesaglitazar		chemical drug			0.027	PPARG
tranexamic acid		chemical drug			0.027	IL1B
LFM-A13		chemical drug			0.027	HMOX1
aurothiomalate		chemical drug			0.027	HMOX1
lomefloxacin		chemical drug			0.027	HMOX1
opioid		chemical drug			0.027	HMOX1
entacapone		chemical drug			0.027	JUN
ampelopsin		chemical drug			0.027	HMOX1
stavudine		chemical drug			0.027	PPARG
vigabatrin		chemical drug			0.027	IL1B
1-methyl-DL-tryptophan		chemical drug			0.027	IL10
crizotinib		chemical drug			0.0273	AREG,TXNIP
ribavirin		chemical drug			0.0273	IFI6,IL10
phytohemagglutinin		chemical drug		0.391	0.0275	HSP90AA1,IL10,IL1B,PTPN1,STAT3
ciprofloxacin		chemical drug			0.0276	HSPD1,LDLR,MSR1
vincristine		chemical drug			0.0283	IL1B,JUN
aspirin		chemical drug		-1.982	0.0292	ABCA1,IL1B,PPARD,SERPINB9
sildenafil		chemical drug			0.0294	HMOX1,HSPD1
CL 316243		chemical drug			0.0306	IL1B,PDK4
beta-glucan		chemical drug			0.0323	IL1B
pinaverium		chemical drug			0.0323	IL1B
GW2580		chemical drug			0.0323	IL1B
repertaxin		chemical drug			0.0323	IL1B
glycitein		chemical drug			0.0323	IL1B
PX 478		chemical drug			0.0323	HIF1A
GSK690693		chemical drug			0.0323	INSR
azilsartan		chemical drug			0.0323	IL1B
peptide T		biologic drug			0.0323	IL10
VTX-2337		chemical drug			0.0323	IL1B
pinometostat		chemical drug			0.0323	PTEN
LY2090314		chemical drug			0.0323	IL10
risedronic acid		chemical drug			0.0323	HSPD1
roflumilast		chemical drug			0.0323	IL1B
grepafloxacin		chemical drug			0.0323	IL1B
nitrendipine		chemical drug			0.0323	LDLR
beta-aminoarteether		chemical drug			0.0323	IL10
strychnine		chemical drug			0.0323	IL1B
ceftriaxone		chemical drug			0.0323	SLC1A3
zofenopril		chemical drug			0.0323	HMOX1
L-buthionine (SR)-sulfoximine		chemical drug			0.0323	HMOX1
drospirenone		chemical drug			0.0323	PPARG
testosterone enanthate		chemical drug			0.0323	PPARG
zoledronic acid		chemical drug			0.0329	IL1B,PPARG
bromodeoxyuridine		chemical drug			0.034	IFI6,IL1B
SB 216763		chemical drug			0.034	IL10,IL1B
roscovitine		chemical drug			0.0352	JUN,PPARG
AGN194204		chemical drug		-1.067	0.0356	ABCA1,CRYBG1,PDK4,PPARG
alefacept		biologic drug			0.0364	CD52,FCGR3A/FCGR3B
topiramate		chemical drug			0.0364	IL1B,PTPN1
GNE-495		chemical drug			0.0376	MAP4K4
blinatumomab		biologic drug			0.0376	IL10
triamcinolone hexacetonide		chemical drug			0.0376	IL1B
rh-endostatin		chemical drug			0.0376	JUN
5R-hydroxytriptolide		chemical drug			0.0376	CD14
Org 48762-0		chemical drug			0.0376	IL1B
PF-4418948		chemical drug			0.0376	IL1B
fangchinoline		chemical drug			0.0376	IL1B
nicorandil		chemical drug			0.0376	JUN
autologous CD22-targeted CAR-T cells		biologic drug			0.0376	IL1B
evodenoson		chemical drug			0.0376	IL10
lansoprazole		chemical drug			0.0376	CD14
dimaprit		chemical drug			0.0376	LDLR
ethacrynic acid		chemical drug			0.0376	HMOX1
diacerein		chemical drug			0.0376	IL1B
baicalein		chemical drug			0.0376	HMOX1,JUN
dimethyl sulfoxide		chemical drug			0.0386	HMOX1,IL1B,JUN
staurosporine		chemical drug			0.0386	HMOX1,IL1B,IL1RAP
bafilomycin A1		chemical drug			0.0389	IL1B,NFKBIA
sorafenib		chemical drug			0.0401	HIF1A,IL1B
fish oils		chemical drug			0.0414	IL10,IL1B
methapyrilene		chemical drug			0.0415	CTSB,EEF1A1,HMOX1
concanavalin a		chemical drug			0.0415	HIF1A,IL10,IL1B
carbamazepine		chemical drug			0.0426	DNAJB1,STAT3
motexafin gadolinium		chemical drug			0.0429	MT2A
hesperidin		chemical drug			0.0429	HMOX1
ticrynafen		chemical drug			0.0429	HMOX1
propolis		biologic drug			0.0429	IL10
sotrastaurin		chemical drug			0.0429	NFKBIA
silmitasertib		chemical drug			0.0429	STAT3
filgotinib		chemical drug			0.0429	IL1B
URB597		chemical drug			0.0429	IL10
mechlorethamine		chemical drug			0.0429	IL1B
bisphosphonate		chemical drug			0.0429	STAT3
clomiphene		chemical drug			0.0429	LDLR
etomidate		chemical drug			0.0429	IL10
exemestane		chemical drug			0.0429	HMOX1
salvianolic acid A		chemical drug			0.0429	HMOX1
rabeprazole		chemical drug			0.0429	IL1B
vardenafil		chemical drug			0.0429	IL1B
saquinavir		chemical drug			0.0429	NFKBIA
AGI-1067		chemical drug			0.0429	IL1B
magnesium sulfate		chemical drug			0.0429	NFKBIA
copper sulfate		chemical drug			0.0429	HMOX1
dihematoporphyrin ether		chemical drug			0.0429	HSPD1
huperzine A		chemical drug			0.0429	IL1B
dobutamine		chemical drug			0.0429	HMOX1
salicylic acid		chemical drug			0.0439	FKBP5,IL1B
luteolin		chemical drug			0.0452	HMOX1,JUN
ritonavir		chemical drug			0.0468	IL1B,LDLR,PPARG
roxithromycin		chemical drug			0.0481	IL1B
BCG vaccine		biologic drug			0.0481	IL10
levetiracetam		chemical drug			0.0481	IL1B
selonsertib		chemical drug			0.0481	IL1B
ciclopirox olamine		chemical drug			0.0481	HIF1A
RWJ 67657		chemical drug			0.0481	IL1B
dapansutrile		chemical drug			0.0481	IL1B
MK2 inhibitory peptide		biologic drug			0.0481	IL1B
acolbifene		chemical drug			0.0481	LDLR
aurothioglucose		chemical drug			0.0481	HMOX1

## Sheet: 6 (COPD vs ctl)
© 2000-2022 QIAGEN. All rights reserved.
Upstream Regulator	Expr Log Ratio	Molecule Type	Predicted Activation State	Activation z-score	p-value of overlap	Target Molecules in Dataset	Mechanistic Network
fluticasone propionate		chemical drug	Inhibited	-2.191	6.22e-13	CD83,HLA-DPA1,HLA-DPB1,HLA-DRA,MT2A,PLIN2,RNASE1,SIGLEC10,TGFB1,TPST1,VSIG4
tetradecanoylphorbol acetate		chemical drug		1.496	1.2e-09	CD44,HLA-DRA,IL18R1,ISG15,ITGAX,JUN,LRRFIP1,mir-29,MSR1,MT2A,NLRP3,PPARD,PRKCH,PTPN1,RGS1,STAT3,TGFB1,VSIG4	37 (23)
filgrastim		biologic drug		0.365	1.33e-08	CD44,CD83,HLA-DPA1,HLA-DPB1,HLA-DRA,HLA-DRB1,IL18R1,ISG15,JUN,NLRP3,RGS1
lipopolysaccharide		chemical drug		-0.248	4.39e-08	ALOX5AP,CD163L1,CD44,CD83,ELF1,HSP90AA1,HSPA1A/HSPA1B,IL18R1,ISG15,ITGAV,ITGAX,JUN,LRRFIP1,MSR1,MT2A,NLRP3,PLIN2,PPARD,RGS1,STAT3,TGFB1,TPST1,VSIG4	37 (19)
dexamethasone		chemical drug		-1.461	1.57e-07	ALOX5AP,BEST1,CD44,CD83,FTL,HLA-DPA1,HLA-DPB1,HLA-DRA,HLA-DRB1,IL18R1,ISG15,ITGAV,JUN,mir-29,MSR1,NLRP3,PABPC1,PLIN2,PPARD,RGS1,TGFB1	35 (16)
LY294002		chemical drug		-0.448	1.61e-07	ALOX5AP,CD44,CD83,HLA-DRB1,ITGAV,JUN,MT2A,PPARD,PTPN1,RGS1,TGFB1	26 (19)
caffeic acid phenethyl ester		chemical drug		-0.115	4.09e-07	CD44,CD83,FTL,S100A6,STAT3,TGFB1	29 (14)
retinol		chemical drug		0	4.6e-07	JUN,PLIN2,PPARD,TGFB1	8 (3)
camptothecin		chemical drug	Inhibited	-2.19	6.01e-07	CD83,HSP90AA1,HSPA1A/HSPA1B,IL18R1,IQGAP2,JUN,NLRP3,PLIN2,PTPN1,SIPA1L1,TGFB1	11 (2)
eicosapentenoic acid		chemical drug		-0.831	1.28e-06	CD44,CD83,ITGAX,JUN,PLIN2,TGFB1	25 (14)
poly rI:rC-RNA		biologic drug		-0.35	1.52e-06	CD44,CD83,IQGAP2,ISG15,ITGAX,JUN,MSR1,NLRP3,RGS1,TET2,TGFB1	28 (18)
cyclosporin A		biologic drug		1.423	3.05e-05	CD44,CD83,HSP90AA1,IQGAP2,ITGAV,JUN,PRKCH,TGFB1	27 (15)
verapamil		chemical drug		-1	3.06e-05	HLA-DPA1,HLA-DRA,JUN,S100A6	16 (6)
gentamicin		chemical drug		-1.195	3.72e-05	HSP90AA1,HSPA1A/HSPA1B,JUN,PLIN2,PTPN1,STAT3,TGFB1
hemocyanin		biologic drug			3.9e-05	CD83,ITGAX,TGFB1
epigallocatechin-gallate		chemical drug		-1.584	4.15e-05	ELF1,ISG15,ITGAV,JUN,STAT3,TGFB1	26 (13)
LY379196		chemical drug			6.32e-05	MSR1,TGFB1
sirolimus		chemical drug		0.647	8.3e-05	HSP90AA1,ISG15,JUN,mir-29,NLRP3,PLIN2,PPARD,RPS4Y1,TGFB1	29 (15)
peptide T		biologic drug			9.47e-05	ITGAV,TGFB1
resiquimod		chemical drug			0.000102	CD44,CD83,ISG15,ITGAX,JUN,NLRP3	26 (13)
lisinopril		biologic drug			0.000179	JUN,S100A6,TGFB1
trichostatin A		chemical drug		1.109	0.000204	CD44,ELF1,FTL,HLA-DRA,HLA-DRB1,ITGAX,mir-29,STAT3,TGFB1,ZSWIM6	33 (17)
medroxyprogesterone acetate		chemical drug		0.52	0.00024	CD44,IQGAP2,ITGAV,JUN,MYL12A,STAT3,TGFB1	31 (16)
calcitriol		chemical drug		-1.52	0.000244	CD44,FTL,ISG15,ITGAX,JUN,PPARD,STAT3,TGFB1	27 (15)
N-nitro-L-arginine methyl ester		chemical drug		1.117	0.000257	CD83,ITGAV,PPARD,TGFB1	23 (11)
decitabine		chemical drug		0.343	0.000272	CD44,HSPA1A/HSPA1B,ISG15,ITGAV,ITGAX,mir-29,PABPC1,STAT3,ZSWIM6	25 (12)
dabrafenib		chemical drug			0.000282	NLRP3,TGFB1
SB203580		chemical drug		0.436	0.000295	ALOX5AP,CD83,ISG15,JUN,mir-29,PPARD,TGFB1	29 (18)
wortmannin		chemical drug		0.391	0.000316	CD44,JUN,MSR1,MT2A,PPARD	21 (13)
valproic acid		chemical drug		0.816	0.000316	CD44,CD83,ELF1,JUN,SMIM3,STAT3,TGFB1	28 (17)
ruxolitinib		chemical drug			0.000373	CD44,MSR1,STAT3	16 (7)
tyrphostin AG 1296		chemical drug			0.000412	JUN,TGFB1	13 (6)
beta-1,3-glucan		chemical drug			0.000567	ITGAV,TGFB1	11 (7)
curcumin		chemical drug		-1.133	0.00066	CD44,FTL,HSPA1A/HSPA1B,JUN,mir-29,STAT3	25 (11)
telmisartan		chemical drug			0.000726	ITGAX,PPARD,TGFB1
icatibant		biologic drug			0.000745	STAT3,TGFB1
N-acetyl-L-cysteine		chemical drug		0.115	0.000789	HLA-DRA,JUN,MSR1,NLRP3,TGFB1	32 (16)
geldanamycin		chemical drug		-0.784	0.00084	HLA-DRA,HSP90AA1,HSPA1A/HSPA1B,JUN,NLRP3	16 (4)
gamma-tocotrienol		chemical drug			0.000843	JUN,NLRP3
androgen		chemical drug			0.00105	CD44,JUN,PTPN1,STAT3	18 (6)
alitretinoin		chemical drug		-0.684	0.00108	CD83,HLA-DRA,ISG15,TGFB1	24 (10)
entinostat		chemical drug			0.00112	CD83,ITGAX,RNASE1
phytohemagglutinin		chemical drug		1.213	0.00113	CD44,CD83,HSP90AA1,PTPN1,STAT3	24 (9)
CpG oligonucleotide		chemical drug			0.00127	CD83,ISG15,ITGAX,MSR1	16 (10)
methylprednisolone		chemical drug		-0.492	0.00128	CD44,HSPA1A/HSPA1B,JUN,PLIN2,PTPN1,STAT3,WDR74	25 (14)
4-hydroxytamoxifen		chemical drug			0.00129	JUN,mir-29,MT2A,PRKCH
dextran sulfate		chemical drug		1.969	0.0013	CD83,ISG15,MSR1,NLRP3,STAT3	26 (13)
isoproterenol		chemical drug		0.676	0.0014	JUN,NLRP3,PLIN2,TGFB1	18 (10)
branched chain amino acids		chemical drug			0.00169	CD83,TGFB1
arsenic trioxide		chemical drug		-0.14	0.00175	ALOX5AP,CD44,mir-29,MT2A,STAT3	19 (7)
CD 437		chemical drug		0	0.00188	FTL,HSP90AA1,JUN,PABPC1
imatinib		chemical drug		-0.152	0.00189	ITGAX,MT2A,PLIN2,STAT3,TGFB1	27 (12)
adavosertib		chemical drug			0.00189	CD83,IL18R1,ISG15
SP600125		chemical drug		0.668	0.00198	CD44,CD83,ISG15,JUN,TGFB1	27 (16)
(+)-MK-801		chemical drug			0.00206	HSPA1A/HSPA1B,JUN,STAT3
hydroxypropyl-beta-cyclodextrin		chemical drug			0.00206	CD44,ITGAX,STAT3
danshen extract		chemical drug			0.00254	TGFB1
bovine testicular hyaluronidase		biologic drug			0.00254	CD44
regorafenib		chemical drug			0.00254	STAT3
serelaxin		biologic drug			0.00254	TGFB1
dihydrotetrabenazine		chemical drug			0.00254	TGFB1
NCB-0846		chemical drug			0.00254	JUN
MK-0812		chemical drug			0.00254	CD44
deferoxamine		chemical drug		-0.762	0.0028	HSPA1A/HSPA1B,JUN,RGS1,TGFB1	19 (10)
irbesartan		chemical drug			0.00358	ITGAV,TGFB1	11 (8)
green tea polyphenol		chemical drug			0.00378	JUN,TGFB1	26 (13)
clodronic acid		chemical drug			0.00378	MSR1,TGFB1
acetaminophen		chemical drug			0.00399	FTL,JUN,mir-29,PTPN1
deferasirox		chemical drug			0.00399	JUN,RGS1
troglitazone		chemical drug		-1.286	0.00423	HLA-DRA,JUN,MSR1,PLIN2,TGFB1	27 (15)
genistein		chemical drug			0.00463	CD44,HSPA1A/HSPA1B,JUN,SIGLEC10,TGFB1	24 (15)
rolipram		chemical drug			0.00466	PTPN1,TGFB1
tanespimycin		chemical drug			0.00494	HSPA1A/HSPA1B,JUN,STAT3
lithium chloride		chemical drug			0.00494	CD44,MT2A,PLIN2
gentamicin C1		chemical drug			0.00507	CD44
clofazimine		chemical drug			0.00507	PLIN2
leteprinim		chemical drug			0.00507	TGFB1
nexrutine		chemical drug			0.00507	STAT3
fidarestat		chemical drug			0.00507	NLRP3
BMS-863233		chemical drug			0.00507	STAT3
amsacrine		chemical drug			0.00507	JUN
paricalcitol		chemical drug			0.00536	NLRP3,TGFB1
fasudil		chemical drug			0.00612	JUN,TGFB1	28 (15)
PLX5622		chemical drug			0.00637	BCAS2,HLA-DRA,ITGAX
aldesleukin		biologic drug			0.00638	HLA-DRA,HLA-DRB1
sulforafan		chemical drug			0.00698	CD44,FTL,mir-29
sangivamycin		chemical drug			0.0076	JUN
chlormethiazole		chemical drug			0.0076	TGFB1
2-(3-chlorophenylamino)phenylacetic acid		chemical drug			0.0076	TGFB1
cobimetinib		chemical drug			0.0076	CD44
3,4-methylenedioxyamphetamine		chemical drug			0.0076	JUN
PF543		chemical drug			0.00776	ITGAX,TGFB1
losartan potassium		chemical drug			0.00816	ITGAV,STAT3,TGFB1	29 (17)
roscovitine		chemical drug			0.00835	CD44,JUN	16 (11)
topiramate		chemical drug			0.00835	PTPN1,TGFB1
H89		chemical drug			0.0101	CD83,JUN,PPARD
rosiglitazone		chemical drug		-1.206	0.0101	GPAT3,HLA-DRA,MSR1,PLIN2,PTPN1
natriuretic peptide derivative		biologic drug			0.0101	PPARD
AZD-1208		chemical drug			0.0101	CD44
belumosudil		chemical drug			0.0101	STAT3
(-)-isoproterenol		chemical drug			0.0101	CD44
senexin B		chemical drug			0.0101	STAT3
palbociclib		chemical drug			0.0102	CD83,JUN
GnRH analog		biologic drug			0.0105	ENSA,HLA-DPB1,JUN,PABPC1
dalfampridine		chemical drug			0.0106	JUN,mir-29
napabucasin		chemical drug			0.0116	CD44,STAT3
retaspimycin		chemical drug			0.0126	STAT3
edratide		biologic drug			0.0126	CD44
tylophorine		chemical drug			0.0126	JUN
luminespib		chemical drug			0.0126	HSPA1A/HSPA1B
elocalcitol		chemical drug			0.0126	TGFB1
WAY 200070		chemical drug			0.0126	JUN
astaxanthin		chemical drug			0.0126	NLRP3
epalrestat		chemical drug			0.0126	TGFB1
pegintron		biologic drug			0.0126	ISG15
entacapone		chemical drug			0.0126	JUN
doxorubicin		chemical drug		0.398	0.0142	CD44,JUN,NLRP3,STAT3,TGFB1
thioctic acid		chemical drug			0.0149	JUN,PPARD
5-fluorouracil		chemical drug			0.015	JUN,mir-29,RPS4Y1,TGFB1
saxagliptin		chemical drug			0.0151	ITGAX
pamrevlumab		biologic drug			0.0151	TGFB1
olmesartan medoxomil		chemical drug			0.0151	TGFB1
emricasan		chemical drug			0.0151	TGFB1
eprosartan		chemical drug			0.0151	TGFB1
afamelanotide		biologic drug			0.0151	PPARD
triamcinolone acetonide		chemical drug			0.016	CD44,JUN,MT2A
sulindac sulfide		chemical drug			0.0164	PPARD,STAT3
U0126		chemical drug		-1.518	0.017	CD44,JUN,PABPC1,PPARD,STAT3
oxaliplatin		chemical drug			0.0173	mir-29,STAT3
TGX-221		chemical drug			0.0177	TGFB1
S-18886		chemical drug			0.0177	TGFB1
rh-endostatin		chemical drug			0.0177	JUN
nicorandil		chemical drug			0.0177	JUN
betaxolol		chemical drug			0.0177	TGFB1
manidipine		chemical drug			0.0177	JUN
pioglitazone		chemical drug			0.0183	PLIN2,PPARD,TGFB1
vitamin E		chemical drug			0.0189	CD44,TGFB1
motexafin gadolinium		chemical drug			0.0201	MT2A
isocoumarin NM-3		chemical drug			0.0201	TGFB1
saracatinib		chemical drug			0.0201	NLRP3
silmitasertib		chemical drug			0.0201	STAT3
bisphosphonate		chemical drug			0.0201	STAT3
CHS-828		chemical drug			0.0201	CD44
romidepsin		biologic drug			0.0207	ITGAV,JUN
estradiol benzoate		chemical drug			0.0211	PPARD,TGFB1
Y 27632		chemical drug			0.0216	CD44,TGFB1
captopril		chemical drug			0.0216	CD44,TGFB1
idelalisib		chemical drug			0.0226	TGFB1
ivermectin		chemical drug			0.0226	NLRP3
ambroxol		chemical drug			0.0226	TGFB1
enalapril		biologic drug			0.023	S100A6,TGFB1
cerivastatin		chemical drug			0.023	JUN,TGFB1
promegestone		chemical drug			0.0239	MT2A,STAT3
atorvastatin		chemical drug			0.024	JUN,RGS1,TGFB1
doxycycline		chemical drug			0.0249	HSPA1A/HSPA1B,ITGAX
INCB054329		chemical drug			0.0251	STAT3
setanaxib		chemical drug			0.0251	CD44
aplidine		biologic drug			0.0251	JUN
PC-SPES		chemical drug			0.0263	FTL,HSP90AA1
lenalidomide		chemical drug			0.0274	HLA-DPB1,HLA-DRB1,RGS1
quercetin		chemical drug			0.0274	CD44,ISG15,JUN
emactuzumab		biologic drug			0.0276	ISG15
nedocromil sodium		chemical drug			0.0276	TGFB1
benazepril		chemical drug			0.0276	TGFB1
R59949		chemical drug			0.0276	ALOX5AP
cisplatin		chemical drug		1.55	0.028	CD44,JUN,mir-29,MT2A,STAT3,TGFB1
cyclophosphamide		chemical drug			0.0288	CD44,IL18R1
sapanisertib		chemical drug			0.0301	PABPC1
carmustine		chemical drug			0.0301	HSP90AA1
trientine		chemical drug			0.0301	TGFB1
N-butyldeoxynojirimycin		chemical drug			0.0301	MSR1
acyline		biologic drug			0.0309	JUN,RPS4Y1
bortezomib		chemical drug			0.0311	HSP90AA1,HSPA1A/HSPA1B,TGFB1
laquinimod		chemical drug			0.0319	MSR1,SMIM3
docosahexaenoic acid		chemical drug			0.0323	CD44,CD83,TGFB1
6-aminopyrazolopyrimidine derivative compound II		chemical drug			0.0325	ISG15
pentylenetetrazol		chemical drug			0.0325	JUN
candesartan cilexetil		chemical drug			0.0325	TGFB1
sulpiride		chemical drug			0.0325	TGFB1
black raspberry extract		chemical drug			0.0336	CD44,HSP90AA1
belnacasan		chemical drug			0.035	NLRP3
iron dextran		chemical drug			0.035	TGFB1
brodalumab		biologic drug			0.035	CD83
diltiazem		chemical drug			0.035	JUN
onapristone		chemical drug			0.035	TGFB1
maxacalcitol		chemical drug			0.035	TGFB1
fenofibrate		chemical drug			0.0357	JUN,STAT3,TGFB1
indomethacin		chemical drug			0.0363	CD44,PLIN2,PPARD
bleomycin		biologic drug			0.0366	mir-29,STAT3,TGFB1
cetuximab		biologic drug			0.0374	STAT3
perindopril		chemical drug			0.0374	TGFB1
methoxsalen		chemical drug			0.0374	STAT3
pentobarbital		chemical drug			0.0374	JUN
triptorelin		biologic drug			0.0374	JUN
geranylgeranylacetone		chemical drug			0.0374	STAT3
fulvestrant		chemical drug			0.0392	JUN,STAT3,TGFB1
digoxin		chemical drug			0.0399	PPARD
Ginkgo biloba		chemical drug			0.0399	JUN
ferric ammonium citrate		chemical drug			0.0399	FTL
clorgyline		chemical drug			0.0399	STAT3
di-2-pyridylketone 4-cyclohexyl-4-methyl-3-thiosemicarbazone		chemical drug			0.0399	JUN
GW501516		chemical drug			0.0403	PLIN2,PPARD
as605240		chemical drug			0.0423	TGFB1
triclosan		chemical drug			0.0423	JUN
fontolizumab		biologic drug			0.0423	ISG15
vadimezan		chemical drug			0.0423	ISG15
budesonide		chemical drug			0.0444	JUN,mir-29,NHSL1
(+)-catechin		chemical drug			0.0448	JUN
SCH772984		chemical drug			0.0448	JUN
indirubin		chemical drug			0.0448	JUN
BAY 61-3606		chemical drug			0.0448	NLRP3
pterostilbene		chemical drug			0.0448	STAT3
TGAL copolymer		biologic drug			0.0448	TGFB1
docetaxel		chemical drug			0.0451	ITGAV,mir-29
glucocorticoid		chemical drug			0.0461	CD44,MT2A,TGFB1
moxonidine		chemical drug			0.0472	TGFB1
tofacitinib		chemical drug			0.0472	ISG15
ethosuximide		chemical drug			0.0472	STAT3
clioquinol		chemical drug			0.0472	JUN
triflusal		chemical drug			0.0472	TGFB1
tazemetostat		chemical drug			0.0472	CD44,STAT3,ZSWIM6
diethylstilbestrol		chemical drug			0.0476	CD83,S100A6,TGFB1
berberine		chemical drug			0.0488	PPARD,TGFB1
semaxinib		chemical drug			0.0494	NLRP3,TGFB1
mibolerone		chemical drug			0.0494	JUN,PRKCH
C-21		chemical drug			0.0496	TGFB1
ponesimod		chemical drug			0.0496	MT2A

## Sheet: 10 (COPD vs ctl)
© 2000-2022 QIAGEN. All rights reserved.
Upstream Regulator	Expr Log Ratio	Molecule Type	Predicted Activation State	Activation z-score	p-value of overlap	Target Molecules in Dataset	Mechanistic Network
lipopolysaccharide		chemical drug		0.995	5.84e-09	ABCA1,ACTB,ALDH1A2,ANXA1,CD14,CD55,CD74,CTSB,DNAJB1,HLA-DRB5,HSP90AA1,HSPA1A/HSPA1B,IGHM,IL18R1,IL6ST,IRAK2,ITGAX,KYNU,LRRFIP1,LST1,MET,MTSS1,PDE3B,PFKFB3,PIK3R5,PPIA,SIRPA,STAT3,STAT4,TMSB10/TMSB4X,TNIP1,VDR,WARS1,ZC3HAV1	62 (15)
decitabine		chemical drug		1.522	2.28e-07	ABCA1,ALDH1A2,CD55,HSP90AB1,HSPA1A/HSPA1B,HSPD1,ITGAX,MET,PABPC1,RPS13,SIRPA,STAT3,STAT4,TCF12,TGFBI,TMSB10/TMSB4X,ZSWIM6	55 (10)
ruxolitinib		chemical drug		0.64	1.47e-06	IL6ST,MT-ATP6,MT-ND3,MT-ND5,STAT3,STAT4	11 (2)
poly rI:rC-RNA		biologic drug		0.089	2.17e-06	ABCA1,ANXA1,CD14,CD74,FCN1,HSPD1,IRAK2,ITGAX,KYNU,PTPRJ,RPS13,SIRPA,TNFRSF21,ZC3HAV1	50 (7)
methylprednisolone		chemical drug		1.053	4.42e-06	ANXA1,C1QB,CD74,HSPA1A/HSPA1B,HSPH1,IGHA1,IGHM,IL6ST,PDE3B,SIRPA,STAT3,TMSB10/TMSB4X,TNIP1
dexamethasone		chemical drug		-0.899	5.02e-06	ABCA1,ACTB,ADAMTS2,ANXA1,C1QB,CD55,CD74,CFL1,CRIP1,CTSB,DPYD,FOXO3,HLA-DPA1,HLA-DRB5,HSPH1,IGHM,IL18R1,IL6ST,LST1,NF1,PABPC1,PFKFB3,TGFBI,TNFRSF21,VDR,WARS1	65 (13)
ST1926		chemical drug	Inhibited	-2.63	6.81e-06	ACTB,CFL1,HSP90AA1,PABPC1,RPL41,RPS26,TMSB10/TMSB4X
PLX5622		chemical drug		1.709	2.18e-05	ACTB,AMPH,CD14,HSP90AB1,IL6ST,ITGAX,MALAT1
topotecan		chemical drug		1.667	2.36e-05	ACTB,CD14,CHD1,HSPA1A/HSPA1B,HSPD1,KCNMA1,PIK3R5,PRNP,XPO6	39 (7)
cisplatin		chemical drug		-0.92	3.81e-05	ACTB,ANXA1,CD14,CTSB,DMXL2,IL6ST,MAML2,MET,NF1,PDE3B,PPIA,STAT3,TMSB10/TMSB4X,VDR	48 (10)
pentosan polysulfate		chemical drug			5.47e-05	ABCA1,PRNP
tetradecanoylphorbol acetate		chemical drug		0.905	8.8e-05	ABCA1,ACTB,ANXA1,CD14,CD55,CTSB,HSP90AB1,IL18R1,ITGAX,LRRFIP1,NF1,PDE3B,PRNP,PTPRJ,STAT3,VDR	60 (11)
trichostatin A		chemical drug		1.033	0.000102	ABCA1,ACTB,CD14,CDC123,CTSB,ITGAX,MAMLD1,MET,PRNP,STAT3,TCF12,TMSB10/TMSB4X,TXNRD1,ZSWIM6	57 (15)
fluticasone propionate		chemical drug	Inhibited	-2.425	0.000104	C1QB,CD74,FCN1,HLA-DPA1,LST1,WARS1
filgrastim		biologic drug		-1.066	0.000122	ANXA1,CD55,CD74,DPYD,HLA-DPA1,HLA-DRB5,IL18R1,LST1,PFKFB3
bortezomib		chemical drug		1.012	0.000169	DNAJA1,DNAJB1,HSP90AA1,HSPA1A/HSPA1B,HSPE1,IGHM,IL6ST	11 (2)
doxorubicin		chemical drug		-0.193	0.00018	ANXA1,CD14,CTSB,FOXO3,HSP90AA1,HSPH1,MET,MT-ND3,MT-ND5,STAT3	42 (9)
interferon beta-1a		biologic drug			0.0002	DNAJA1,DNAJB1,HLA-DRB5,IGHM,PPIA
geldanamycin		chemical drug	Activated	2.414	0.000255	ANXA1,DNAJB1,HSP90AA1,HSP90AB1,HSPA1A/HSPA1B,HSPD1,MET	39 (8)
tanespimycin		chemical drug		0.391	0.000297	DNAJB1,HSP90AB1,HSPA1A/HSPA1B,PTMA,STAT3
sirolimus		chemical drug	Inhibited	-2.429	0.000297	ACTB,FOXO3,HSP90AA1,HSP90AB1,HSPD1,PPIA,PRNP,PTMA,RPL41,RPS13,RPS26	41 (10)
vancomycin		biologic drug		0.128	0.000373	ANXA1,C1QB,CD14,CTSB,STAT3,TMSB10/TMSB4X
BMS-690514		chemical drug			0.000383	HSP90AA1,HSPE1,HSPH1
deferoxamine		chemical drug		-1.342	0.000483	CD14,CYTH1,HSPA1A/HSPA1B,MT-ND5,PFKFB3,VDR
camptothecin		chemical drug	Activated	2.433	0.000484	DNAJA1,HSP90AA1,HSP90AB1,HSPA1A/HSPA1B,HSPH1,IL18R1,LST1,PHF21A,PPIA,TGFBI	14 (2)
chloroquine		chemical drug		-0.152	0.000646	FOXO3,MET,PRNP,STAT4	39 (8)
mifepristone		chemical drug		-1.219	0.00071	ANXA1,C1QB,CD14,CD74,HSPD1,PFKFB3,VDR	32 (5)
desmopressin		biologic drug			0.000759	ACTB,HSPA1A/HSPA1B,HSPH1,PPIA
imatinib		chemical drug		-1.767	0.00076	CHD1,FOXO3,HSP90AB1,HSPE1,ITGAX,PRNP,STAT3	41 (5)
simvastatin		chemical drug		1.958	0.000795	ABCA1,ANXA1,CD14,CD55,COTL1,STAT4	38 (8)
PC-SPES		chemical drug			0.000886	ANXA1,DNAJB1,HSP90AA1,TMSB10/TMSB4X
hydroxypropyl-beta-cyclodextrin		chemical drug		-1.177	0.00092	ABCA1,CTSB,ITGAX,STAT3	43 (10)
H89		chemical drug		0.927	0.00101	ABCA1,ANXA1,CD14,CD55,PDE3B
memantine		chemical drug			0.00102	HSP90AB1,SIRPA,STAT3
carmustine		chemical drug			0.00117	HSP90AA1,HSP90AB1
cyclosporin A		biologic drug		-1.238	0.0012	ANXA1,CD14,CD55,HSP90AA1,HSPD1,PDE3B,PPIA,TMSB10/TMSB4X
plicamycin		chemical drug		0.392	0.0014	ABCA1,FOXO3,MET,VDR	39 (8)
indomethacin		chemical drug		0.391	0.00147	ANXA1,CD14,CD55,TMSB10/TMSB4X,TNFRSF21,VDR
geranylgeranylacetone		chemical drug			0.00185	HSPH1,STAT3
CD 437		chemical drug	Inhibited	-2.236	0.00198	DNAJA1,HSP90AA1,PABPC1,SH3BGRL3,TMSB10/TMSB4X
phytohemagglutinin		chemical drug		-0.97	0.0022	GAB2,HSP90AA1,MET,PTPRJ,STAT3,STAT4
glucocorticoid		chemical drug		0.928	0.00242	ANXA1,CD74,CRIP1,IGHM,PRNP,VDR	37 (8)
diethylstilbestrol		chemical drug		1.732	0.00258	CD14,CD55,HSP90AB1,RIN2,TGFBI,VDR
pterostilbene		chemical drug			0.00267	MET,STAT3
lomustine		chemical drug			0.00278	ANXA1,CD14,TMSB10/TMSB4X
paclitaxel		chemical drug			0.00296	FOXO3,HSP90AB1,IGHA1,IGHM,LCP1,STAT3
triamterene		chemical drug			0.00315	ANXA1,CD14,TMSB10/TMSB4X
GnRH analog		biologic drug		-0.816	0.00333	CYTH1,HSP90AB1,IGHM,KYNU,PABPC1,PPIA
calcitriol		chemical drug		-0.114	0.00364	ALDH1A2,CD14,FOXO3,HSPD1,ITGAX,MECOM,PRNP,STAT3,VDR	46 (7)
gentamicin C		chemical drug			0.00385	ANXA1,CD14,TMSB10/TMSB4X
cis-urocanic acid		chemical drug			0.00399	CD55,HSPA1A/HSPA1B
U0126		chemical drug		-0.555	0.00405	HSP90AB1,IGHA1,IGHM,MET,PABPC1,PTPRJ,SIRPA,STAT3
8-chloroadenosine		chemical drug			0.0043	MET
regorafenib		chemical drug			0.0043	STAT3
IPI 493		chemical drug			0.0043	MET
actinomycin D		biologic drug		-0.063	0.00461	ABCA1,ACTB,CD55,PFKFB3,VDR	52 (10)
gentamicin		chemical drug		0.896	0.00478	C1QB,CTSB,HSP90AA1,HSPA1A/HSPA1B,KYNU,STAT3
lenalidomide		chemical drug		0.6	0.00501	DOCK4,HS3ST3B1,KCNMA1,MAML2,TNFRSF21
methotrexate		chemical drug			0.00518	ABCA1,ACTB,C1QB,MET,PPIA
medroxyprogesterone acetate		chemical drug		-0.378	0.00527	ARSG,CTSB,IL6ST,PDE3B,STAT3,STAT4,TMSB10/TMSB4X	55 (11)
hemocyanin		biologic drug			0.00556	CD14,ITGAX
pemetrexed		chemical drug			0.00556	CD14,MET
5-fluorouracil		chemical drug		0.218	0.0058	HSP90AB1,HSPE1,MT-ND3,RPS13,TMSB10/TMSB4X,VDR
tacrolimus		chemical drug		-1.109	0.00606	CD74,HSPD1,PDE3B,PRNP,PTPRJ	21 (3)
paroxetine		chemical drug			0.00784	ABCA1,CD55
25-hydroxyvitamin D		chemical drug			0.00857	VDR
lynestrenol		chemical drug			0.00857	ABCA1
cabozantinib/erlotinib		chemical drug			0.00857	MET
nexrutine		chemical drug			0.00857	STAT3
BMS-863233		chemical drug			0.00857	STAT3
KT 5926		chemical drug			0.00857	CD14
resiquimod		chemical drug			0.00886	IRAK2,ITGAX,KCNMA1,TNIP1,WARS1
estrogen		chemical drug		1.964	0.00911	ABCA1,HSPH1,PTMA,STAT3,VDR	46 (7)
curcumin		chemical drug		0.115	0.00931	ABCA1,DNAJB1,HSPA1A/HSPA1B,PDE3B,STAT3,UBE2E2
ammonium chloride		chemical drug			0.00938	CTSB,MET
cephaloridine		chemical drug			0.00947	FCN1,HSPA1A/HSPA1B,HSPH1
CFI-402257		chemical drug			0.0105	CD55,IL6ST
indole-3-carbinol		chemical drug			0.0105	ANXA1,LCP1
selenium		chemical drug			0.011	STAT3,TXNRD1
allopurinol		chemical drug			0.0111	ANXA1,CD14,TMSB10/TMSB4X
colistin		biologic drug			0.0116	C1QB,CTSB,STAT3
aprepitant		chemical drug			0.0122	ANXA1,VDR
kanamycin A		chemical drug			0.0122	C1QB,CTSB,STAT3
tibolone		chemical drug			0.0128	PFKFB3
xanthohumol		chemical drug			0.0134	ANXA1,GAB2
phenacetin		chemical drug			0.0141	ANXA1,TMSB10/TMSB4X
dextran sulfate		chemical drug			0.0146	CD14,CD74,LCP1,STAT3,VDR
MK2206		chemical drug			0.0147	ACTB,PFKFB3
bisindolylmaleimide I		chemical drug			0.0157	CD55,HSP90AB1,MET
arsenic trioxide		chemical drug		-0.895	0.016	HSP90AB1,HSPE1,STAT3,TXNRD1,VDR
metronidazole		chemical drug			0.0161	C1QB,CTSB,STAT3
AGN194204		chemical drug		1	0.0165	ABCA1,COTL1,IGHM,PRNP
belumosudil		chemical drug			0.0171	STAT3
liarozole		chemical drug			0.0171	VDR
(S)-duloxetine		chemical drug			0.0171	ACTB
senexin B		chemical drug			0.0171	STAT3
sertindole		chemical drug			0.0171	ACTB
myristoylated protein kinase C peptide inhibitor		biologic drug			0.0171	CD55
vincristine		chemical drug			0.0181	HSP90AB1,LCP1
sildenafil		chemical drug			0.0189	HSPD1,HSPE1
dimethyl sulfoxide		chemical drug			0.0209	ACTB,ANXA1,HSP90AB1
propofol		chemical drug			0.0211	ANXA1,CD14
PF543		chemical drug			0.0211	ACTB,ITGAX
retaspimycin		chemical drug			0.0213	STAT3
edratide		biologic drug			0.0213	FOXO3
luminespib		chemical drug			0.0213	HSPA1A/HSPA1B
colestimide		chemical drug			0.0213	ABCA1
LY379196		chemical drug			0.0213	CD55
methapyrilene		chemical drug			0.0226	CTSB,KYNU,TXNRD1
mibolerone		chemical drug			0.0226	CD74,PPIA,TGFBI
inositol		chemical drug			0.0255	CD55
saxagliptin		chemical drug			0.0255	ITGAX
GSK690693		chemical drug			0.0255	MET
risedronic acid		chemical drug			0.0255	HSPD1
vismodegib		chemical drug			0.0275	CD14,MTSS1
carbamazepine		chemical drug			0.0275	DNAJB1,STAT3
phenylbutazone		chemical drug			0.0284	ANXA1,TMSB10/TMSB4X
5R-hydroxytriptolide		chemical drug			0.0297	CD14
lansoprazole		chemical drug			0.0297	CD14
seocalcitol		chemical drug			0.0301	STAT3,VDR
sunitinib		chemical drug			0.0319	MET,TGFBI
1,25-dihydroxyvitamin D		chemical drug			0.0337	STAT3,VDR
silmitasertib		chemical drug			0.0339	STAT3
bisphosphonate		chemical drug			0.0339	STAT3
dihematoporphyrin ether		chemical drug			0.0339	HSPD1
fenofibrate		chemical drug			0.0343	ALDH1A2,IL6ST,RBFOX2,STAT3
17-alpha-ethinylestradiol		chemical drug			0.0344	C1QB,CD74,MET
nitrofurantoin		chemical drug			0.0349	ACTB,CTSB,MET
LY294002		chemical drug		0.355	0.036	ABCA1,CD14,CD74,HSP90AB1,IGHM,PTPRJ
selumetinib		chemical drug			0.0365	FOXO3,MET
napabucasin		chemical drug			0.0365	ACTB,STAT3
verapamil		chemical drug			0.0365	HLA-DPA1,TXNRD1
Go 6976		chemical drug			0.0365	ABCA1,CD55
methamphetamine		chemical drug			0.037	ALDH1A2,NF1,VDR
genistein		chemical drug		-0.447	0.0375	ARSG,CD74,CTSB,HSPA1A/HSPA1B,VDR
tolfenamic acid		chemical drug			0.038	MET
raltitrexed		chemical drug			0.038	TMSB10/TMSB4X
pravastatin		chemical drug			0.0394	ABCA1,COTL1
androgen		chemical drug			0.0404	CTSB,FOXO3,STAT3
alpelisib		chemical drug			0.0421	FOXO3
ulixertinib		chemical drug			0.0421	ABCA1
INCB054329		chemical drug			0.0421	STAT3
bleomycin		biologic drug		0.13	0.0431	GAB2,HSP90AA1,SIRPA,STAT3
trans-hydroxytamoxifen		chemical drug			0.0439	EPB41L3,KYNU,WARS1
CpG oligonucleotide		chemical drug			0.0457	ABCA1,CD14,ITGAX
enoxacin		chemical drug			0.0463	LCP1
SU1498		chemical drug			0.0463	CD55
CBR-470-1		chemical drug			0.0463	TXNRD1
oxaliplatin		chemical drug			0.0465	STAT3,TMSB10/TMSB4X
tazemetostat		chemical drug		1	0.0489	MET,STAT3,TCF12,ZSWIM6
entinostat		chemical drug			0.0497	ITGAX,VDR
