# Supplementary material for: Single-Cell Sequencing of Lung Macrophages and Monocytes Reveals Novel Therapeutic Targets in COPD
Source: Cells. 2023 Dec 5;12(24):2771. doi: 10.3390/cells12242771 (PMC10741950; doi:10.3390/cells12242771)
Supplement: Supplementary file 1 [file cells-12-02771-s001.zip › Table S4 GSEA HALLMARK_012up.csv]

	ID	Description	GeneRatio	BgRatio	pvalue	p.adjust	qvalue	geneID	Count
HALLMARK_INTERFERON_GAMMA_RESPONSE	HALLMARK_INTERFERON_GAMMA_RESPONSE	HALLMARK_INTERFERON_GAMMA_RESPONSE	8/30	200/4383	4.01605632898264e-05	0.0013654591518541	0.00126822831441557	MT2A/PTPN1/TNFAIP3/PELI1/SOD2/PDE4B/STAT3/SAMHD1	8
HALLMARK_IL6_JAK_STAT3_SIGNALING	HALLMARK_IL6_JAK_STAT3_SIGNALING	HALLMARK_IL6_JAK_STAT3_SIGNALING	4/30	87/4383	0.00267641671698849	0.0454990841888043	0.0422592113208709	CD44/PTPN1/STAT3/IL2RG	4
HALLMARK_HYPOXIA	HALLMARK_HYPOXIA	HALLMARK_HYPOXIA	5/30	200/4383	0.0105561216769715	0.089727034254258	0.0833378027129332	MT2A/MT1E/TNFAIP3/PLAC8/RBPJ	5
HALLMARK_TNFA_SIGNALING_VIA_NFKB	HALLMARK_TNFA_SIGNALING_VIA_NFKB	HALLMARK_TNFA_SIGNALING_VIA_NFKB	5/30	200/4383	0.0105561216769715	0.089727034254258	0.0833378027129332	CD44/KLF4/TNFAIP3/SOD2/PDE4B	5
HALLMARK_APOPTOSIS	HALLMARK_APOPTOSIS	HALLMARK_APOPTOSIS	3/30	161/4383	0.0958924270680113	0.538263957997241	0.49993556470332	CD44/SOD2/NEDD9	3
HALLMARK_EPITHELIAL_MESENCHYMAL_TRANSITION	HALLMARK_EPITHELIAL_MESENCHYMAL_TRANSITION	HALLMARK_EPITHELIAL_MESENCHYMAL_TRANSITION	3/30	200/4383	0.154873238930921	0.538263957997241	0.49993556470332	CD44/TNFAIP3/THBS1	3
HALLMARK_KRAS_SIGNALING_UP	HALLMARK_KRAS_SIGNALING_UP	HALLMARK_KRAS_SIGNALING_UP	3/30	200/4383	0.154873238930921	0.538263957997241	0.49993556470332	KLF4/TNFAIP3/IL2RG	3
HALLMARK_MYC_TARGETS_V1	HALLMARK_MYC_TARGETS_V1	HALLMARK_MYC_TARGETS_V1	3/30	200/4383	0.154873238930921	0.538263957997241	0.49993556470332	PABPC1/PABPC4/DDX21	3
HALLMARK_P53_PATHWAY	HALLMARK_P53_PATHWAY	HALLMARK_P53_PATHWAY	3/30	200/4383	0.154873238930921	0.538263957997241	0.49993556470332	RPS12/KLF4/SERPINB5	3
HALLMARK_PEROXISOME	HALLMARK_PEROXISOME	HALLMARK_PEROXISOME	2/30	104/4383	0.158312928822718	0.538263957997241	0.49993556470332	PABPC1/SOD2	2
HALLMARK_HEDGEHOG_SIGNALING	HALLMARK_HEDGEHOG_SIGNALING	HALLMARK_HEDGEHOG_SIGNALING	1/30	36/4383	0.219834909424505	0.545049865176004	0.506238264869354	DPYSL2	1
HALLMARK_COAGULATION	HALLMARK_COAGULATION	HALLMARK_COAGULATION	2/30	138/4383	0.243381573801826	0.545049865176004	0.506238264869354	THBS1/LTA4H	2
HALLMARK_WNT_BETA_CATENIN_SIGNALING	HALLMARK_WNT_BETA_CATENIN_SIGNALING	HALLMARK_WNT_BETA_CATENIN_SIGNALING	1/30	42/4383	0.251605579288242	0.545049865176004	0.506238264869354	RBPJ	1
HALLMARK_APICAL_SURFACE	HALLMARK_APICAL_SURFACE	HALLMARK_APICAL_SURFACE	1/30	44/4383	0.261915102779682	0.545049865176004	0.506238264869354	IL2RG	1
HALLMARK_REACTIVE_OXYGEN_SPECIES_PATHWAY	HALLMARK_REACTIVE_OXYGEN_SPECIES_PATHWAY	HALLMARK_REACTIVE_OXYGEN_SPECIES_PATHWAY	1/30	49/4383	0.287091873519423	0.545049865176004	0.506238264869354	SOD2	1
HALLMARK_UV_RESPONSE_UP	HALLMARK_UV_RESPONSE_UP	HALLMARK_UV_RESPONSE_UP	2/30	158/4383	0.294745810811119	0.545049865176004	0.506238264869354	SOD2/DDX21	2
HALLMARK_TGF_BETA_SIGNALING	HALLMARK_TGF_BETA_SIGNALING	HALLMARK_TGF_BETA_SIGNALING	1/30	54/4383	0.311437520002335	0.545049865176004	0.506238264869354	THBS1	1
HALLMARK_MYC_TARGETS_V2	HALLMARK_MYC_TARGETS_V2	HALLMARK_MYC_TARGETS_V2	1/30	58/4383	0.330333477405208	0.545049865176004	0.506238264869354	WDR74	1
HALLMARK_MITOTIC_SPINDLE	HALLMARK_MITOTIC_SPINDLE	HALLMARK_MITOTIC_SPINDLE	2/30	199/4383	0.398312972480665	0.545049865176004	0.506238264869354	ARF6/NEDD9	2
HALLMARK_ALLOGRAFT_REJECTION	HALLMARK_ALLOGRAFT_REJECTION	HALLMARK_ALLOGRAFT_REJECTION	2/30	200/4383	0.400771959688238	0.545049865176004	0.506238264869354	HLA-DRA/IL2RG	2
HALLMARK_COMPLEMENT	HALLMARK_COMPLEMENT	HALLMARK_COMPLEMENT	2/30	200/4383	0.400771959688238	0.545049865176004	0.506238264869354	TNFAIP3/LTA4H	2
HALLMARK_ESTROGEN_RESPONSE_EARLY	HALLMARK_ESTROGEN_RESPONSE_EARLY	HALLMARK_ESTROGEN_RESPONSE_EARLY	2/30	200/4383	0.400771959688238	0.545049865176004	0.506238264869354	CD44/KLF4	2
HALLMARK_ESTROGEN_RESPONSE_LATE	HALLMARK_ESTROGEN_RESPONSE_LATE	HALLMARK_ESTROGEN_RESPONSE_LATE	2/30	200/4383	0.400771959688238	0.545049865176004	0.506238264869354	CD44/KLF4	2
HALLMARK_G2M_CHECKPOINT	HALLMARK_G2M_CHECKPOINT	HALLMARK_G2M_CHECKPOINT	2/30	200/4383	0.400771959688238	0.545049865176004	0.506238264869354	MT2A/NCL	2
HALLMARK_GLYCOLYSIS	HALLMARK_GLYCOLYSIS	HALLMARK_GLYCOLYSIS	2/30	200/4383	0.400771959688238	0.545049865176004	0.506238264869354	CD44/PKP2	2
HALLMARK_PI3K_AKT_MTOR_SIGNALING	HALLMARK_PI3K_AKT_MTOR_SIGNALING	HALLMARK_PI3K_AKT_MTOR_SIGNALING	1/30	105/4383	0.518033843833358	0.67742887270516	0.629190903441325	IL2RG	1
HALLMARK_UNFOLDED_PROTEIN_RESPONSE	HALLMARK_UNFOLDED_PROTEIN_RESPONSE	HALLMARK_UNFOLDED_PROTEIN_RESPONSE	1/30	113/4383	0.544439282881134	0.685590208072539	0.636771091089045	YWHAZ	1
HALLMARK_UV_RESPONSE_DN	HALLMARK_UV_RESPONSE_DN	HALLMARK_UV_RESPONSE_DN	1/30	144/4383	0.634163141669977	0.754855891328042	0.701104543029142	MT1E	1
HALLMARK_DNA_REPAIR	HALLMARK_DNA_REPAIR	HALLMARK_DNA_REPAIR	1/30	150/4383	0.649434195712723	0.754855891328042	0.701104543029142	PDE4B	1
HALLMARK_IL2_STAT5_SIGNALING	HALLMARK_IL2_STAT5_SIGNALING	HALLMARK_IL2_STAT5_SIGNALING	1/30	199/4383	0.753085471669843	0.754855891328042	0.701104543029142	CD44	1
HALLMARK_APICAL_JUNCTION	HALLMARK_APICAL_JUNCTION	HALLMARK_APICAL_JUNCTION	1/30	200/4383	0.754855891328042	0.754855891328042	0.701104543029142	ARPC2	1
HALLMARK_INFLAMMATORY_RESPONSE	HALLMARK_INFLAMMATORY_RESPONSE	HALLMARK_INFLAMMATORY_RESPONSE	1/30	200/4383	0.754855891328042	0.754855891328042	0.701104543029142	PDE4B	1
HALLMARK_MTORC1_SIGNALING	HALLMARK_MTORC1_SIGNALING	HALLMARK_MTORC1_SIGNALING	1/30	200/4383	0.754855891328042	0.754855891328042	0.701104543029142	LTA4H	1
HALLMARK_XENOBIOTIC_METABOLISM	HALLMARK_XENOBIOTIC_METABOLISM	HALLMARK_XENOBIOTIC_METABOLISM	1/30	200/4383	0.754855891328042	0.754855891328042	0.701104543029142	MT2A	1
