# Supplementary material for: Single-Cell Sequencing of Lung Macrophages and Monocytes Reveals Novel Therapeutic Targets in COPD
Source: Cells. 2023 Dec 5;12(24):2771. doi: 10.3390/cells12242771 (PMC10741950; doi:10.3390/cells12242771)
Supplement: Supplementary file 1 [file cells-12-02771-s001.zip › Table S5 GSEA HALLMARK _012down.csv]

	ID	Description	GeneRatio	BgRatio	pvalue	p.adjust	qvalue	geneID	Count
HALLMARK_ADIPOGENESIS	HALLMARK_ADIPOGENESIS	HALLMARK_ADIPOGENESIS	10/52	200/4383	9.21361320242571e-05	0.003224764620849	0.00290956206392391	APOE/CHCHD10/MGST3/ATP1B3/CD36/UQCRQ/FABP4/UBC/POR/PLIN2	10
HALLMARK_MTORC1_SIGNALING	HALLMARK_MTORC1_SIGNALING	HALLMARK_MTORC1_SIGNALING	8/52	200/4383	0.00217489054542779	0.0380605845449862	0.0343403770330703	NUPR1/HSPD1/HSPE1/SCD/CTSC/HSPA4/STIP1/HSPA9	8
HALLMARK_COMPLEMENT	HALLMARK_COMPLEMENT	HALLMARK_COMPLEMENT	7/52	200/4383	0.00864787085444042	0.0721488189905118	0.0650966787884317	HSPA1A/APOC1/C1QC/SERPING1/CTSC/CD36/CTSL	7
HALLMARK_XENOBIOTIC_METABOLISM	HALLMARK_XENOBIOTIC_METABOLISM	HALLMARK_XENOBIOTIC_METABOLISM	7/52	200/4383	0.00864787085444042	0.0721488189905118	0.0650966787884317	APOE/AKR1C2/AKR1C3/HMOX1/RBP4/CD36/POR	7
HALLMARK_UV_RESPONSE_UP	HALLMARK_UV_RESPONSE_UP	HALLMARK_UV_RESPONSE_UP	6/52	158/4383	0.0103069741415017	0.0721488189905118	0.0650966787884317	IGFBP2/DNAJB1/FGF18/HMOX1/STIP1/MGAT1	6
HALLMARK_COAGULATION	HALLMARK_COAGULATION	HALLMARK_COAGULATION	4/52	138/4383	0.0797343032058212	0.389192817812299	0.351151414567488	APOC1/SERPING1/MMP2/CFD	4
HALLMARK_OXIDATIVE_PHOSPHORYLATION	HALLMARK_OXIDATIVE_PHOSPHORYLATION	HALLMARK_OXIDATIVE_PHOSPHORYLATION	5/52	200/4383	0.0865615321084859	0.389192817812299	0.351151414567488	MGST3/UQCRQ/ATP1B1/POR/HSPA9	5
HALLMARK_APICAL_SURFACE	HALLMARK_APICAL_SURFACE	HALLMARK_APICAL_SURFACE	2/52	44/4383	0.0952899309263362	0.389192817812299	0.351151414567488	APP/HSPB1	2
HALLMARK_REACTIVE_OXYGEN_SPECIES_PATHWAY	HALLMARK_REACTIVE_OXYGEN_SPECIES_PATHWAY	HALLMARK_REACTIVE_OXYGEN_SPECIES_PATHWAY	2/52	49/4383	0.114179708001882	0.389192817812299	0.351151414567488	MGST1/FTL	2
HALLMARK_FATTY_ACID_METABOLISM	HALLMARK_FATTY_ACID_METABOLISM	HALLMARK_FATTY_ACID_METABOLISM	4/52	158/4383	0.116280842451771	0.389192817812299	0.351151414567488	HSPH1/LGALS1/HPGD/CD36	4
HALLMARK_APOPTOSIS	HALLMARK_APOPTOSIS	HALLMARK_APOPTOSIS	4/52	161/4383	0.122317742741008	0.389192817812299	0.351151414567488	APP/HMOX1/HSPB1/MMP2	4
HALLMARK_MYC_TARGETS_V2	HALLMARK_MYC_TARGETS_V2	HALLMARK_MYC_TARGETS_V2	2/52	58/4383	0.150275066033268	0.438302275930364	0.395460700087547	HSPD1/HSPE1	2
HALLMARK_EPITHELIAL_MESENCHYMAL_TRANSITION	HALLMARK_EPITHELIAL_MESENCHYMAL_TRANSITION	HALLMARK_EPITHELIAL_MESENCHYMAL_TRANSITION	4/52	200/4383	0.211642368978832	0.52910592244708	0.477388802207891	PVR/IGFBP2/LGALS1/MMP2	4
HALLMARK_MYOGENESIS	HALLMARK_MYOGENESIS	HALLMARK_MYOGENESIS	4/52	200/4383	0.211642368978832	0.52910592244708	0.477388802207891	SCD/APP/CD36/CFD	4
HALLMARK_IL6_JAK_STAT3_SIGNALING	HALLMARK_IL6_JAK_STAT3_SIGNALING	HALLMARK_IL6_JAK_STAT3_SIGNALING	2/52	87/4383	0.276204224721714	0.644476524350665	0.581482578361502	HMOX1/CD36	2
HALLMARK_PROTEIN_SECRETION	HALLMARK_PROTEIN_SECRETION	HALLMARK_PROTEIN_SECRETION	2/52	96/4383	0.316008704355401	0.677668407539751	0.611430142141129	CD63/CTSC	2
HALLMARK_ANDROGEN_RESPONSE	HALLMARK_ANDROGEN_RESPONSE	HALLMARK_ANDROGEN_RESPONSE	2/52	100/4383	0.333577991950604	0.677668407539751	0.611430142141129	SCD/HPGD	2
HALLMARK_ANGIOGENESIS	HALLMARK_ANGIOGENESIS	HALLMARK_ANGIOGENESIS	1/52	36/4383	0.350396913517803	0.677668407539751	0.611430142141129	APP	1
HALLMARK_UNFOLDED_PROTEIN_RESPONSE	HALLMARK_UNFOLDED_PROTEIN_RESPONSE	HALLMARK_UNFOLDED_PROTEIN_RESPONSE	2/52	113/4383	0.389725868167922	0.677668407539751	0.611430142141129	DNAJA4/HSPA9	2
HALLMARK_HYPOXIA	HALLMARK_HYPOXIA	HALLMARK_HYPOXIA	3/52	200/4383	0.425962999024986	0.677668407539751	0.611430142141129	HMOX1/SDC2/PLIN2	3
HALLMARK_INFLAMMATORY_RESPONSE	HALLMARK_INFLAMMATORY_RESPONSE	HALLMARK_INFLAMMATORY_RESPONSE	3/52	200/4383	0.425962999024986	0.677668407539751	0.611430142141129	PVR/MSR1/HRH1	3
HALLMARK_P53_PATHWAY	HALLMARK_P53_PATHWAY	HALLMARK_P53_PATHWAY	3/52	200/4383	0.425962999024986	0.677668407539751	0.611430142141129	NUPR1/APP/HMOX1	3
HALLMARK_UV_RESPONSE_DN	HALLMARK_UV_RESPONSE_DN	HALLMARK_UV_RESPONSE_DN	2/52	144/4383	0.514298516966419	0.782628177992377	0.706130686910416	RND3/SDC2	2
HALLMARK_CHOLESTEROL_HOMEOSTASIS	HALLMARK_CHOLESTEROL_HOMEOSTASIS	HALLMARK_CHOLESTEROL_HOMEOSTASIS	1/52	74/4383	0.589619368547569	0.834458496008281	0.752894883616494	SCD	1
HALLMARK_INTERFERON_ALPHA_RESPONSE	HALLMARK_INTERFERON_ALPHA_RESPONSE	HALLMARK_INTERFERON_ALPHA_RESPONSE	1/52	97/4383	0.689830655846046	0.834458496008281	0.752894883616494	OASL	1
HALLMARK_IL2_STAT5_SIGNALING	HALLMARK_IL2_STAT5_SIGNALING	HALLMARK_IL2_STAT5_SIGNALING	2/52	199/4383	0.691763444408227	0.834458496008281	0.752894883616494	TTC39B/PLIN2	2
HALLMARK_INTERFERON_GAMMA_RESPONSE	HALLMARK_INTERFERON_GAMMA_RESPONSE	HALLMARK_INTERFERON_GAMMA_RESPONSE	2/52	200/4383	0.694448297391896	0.834458496008281	0.752894883616494	SERPING1/OASL	2
HALLMARK_KRAS_SIGNALING_DN	HALLMARK_KRAS_SIGNALING_DN	HALLMARK_KRAS_SIGNALING_DN	2/52	200/4383	0.694448297391896	0.834458496008281	0.752894883616494	IGFBP2/SCGB1A1	2
HALLMARK_MYC_TARGETS_V1	HALLMARK_MYC_TARGETS_V1	HALLMARK_MYC_TARGETS_V1	2/52	200/4383	0.694448297391896	0.834458496008281	0.752894883616494	HSPD1/HSPE1	2
HALLMARK_PEROXISOME	HALLMARK_PEROXISOME	HALLMARK_PEROXISOME	1/52	104/4383	0.71525013943567	0.834458496008281	0.752894883616494	SCGB1A1	1
HALLMARK_MITOTIC_SPINDLE	HALLMARK_MITOTIC_SPINDLE	HALLMARK_MITOTIC_SPINDLE	1/52	199/4383	0.912026677421394	0.913120036115009	0.823867701757903	FGD4	1
HALLMARK_APICAL_JUNCTION	HALLMARK_APICAL_JUNCTION	HALLMARK_APICAL_JUNCTION	1/52	200/4383	0.913120036115009	0.913120036115009	0.823867701757903	MMP2	1
HALLMARK_GLYCOLYSIS	HALLMARK_GLYCOLYSIS	HALLMARK_GLYCOLYSIS	1/52	200/4383	0.913120036115009	0.913120036115009	0.823867701757903	SDC2	1
HALLMARK_HEME_METABOLISM	HALLMARK_HEME_METABOLISM	HALLMARK_HEME_METABOLISM	1/52	200/4383	0.913120036115009	0.913120036115009	0.823867701757903	MGST3	1
HALLMARK_KRAS_SIGNALING_UP	HALLMARK_KRAS_SIGNALING_UP	HALLMARK_KRAS_SIGNALING_UP	1/52	200/4383	0.913120036115009	0.913120036115009	0.823867701757903	RBP4	1
