# Supplementary material for: Single-Cell Sequencing of Lung Macrophages and Monocytes Reveals Novel Therapeutic Targets in COPD
Source: Cells. 2023 Dec 5;12(24):2771. doi: 10.3390/cells12242771 (PMC10741950; doi:10.3390/cells12242771)
Supplement: Supplementary file 1 [file cells-12-02771-s001.zip › Table S6_GO_BP_1511up.csv]

	ID	Description	GeneRatio	BgRatio	pvalue	p.adjust	qvalue	geneID	Count
GOBP_RESPONSE_TO_MOLECULE_OF_BACTERIAL_ORIGIN	GOBP_RESPONSE_TO_MOLECULE_OF_BACTERIAL_ORIGIN	GOBP_RESPONSE_TO_MOLECULE_OF_BACTERIAL_ORIGIN	28/201	354/17872	4.48780674159426e-16	1.33871275101757e-12	9.61335444120454e-13	NLRP3/IL1B/TNFAIP3/PELI1/NFKBIA/SOD2/IRAK3/NFKB1/GCH1/IL1A/HCK/CXCL2/ZFP36/SCGB1A1/CXCL3/PDE4B/IRAK2/TNIP3/CD55/TNF/CCL3/PRKCE/ADM/CXCL8/LITAF/PTGS2/TNIP1/TLR4	28
GOBP_CYTOKINE_MEDIATED_SIGNALING_PATHWAY	GOBP_CYTOKINE_MEDIATED_SIGNALING_PATHWAY	GOBP_CYTOKINE_MEDIATED_SIGNALING_PATHWAY	30/201	485/17872	2.77211399984365e-14	4.13460803076681e-11	2.96907999456939e-11	IL1B/TNFAIP3/NFKBIA/IRAK3/CCL4/IL1R2/ACSL1/IL1A/HCK/BIRC3/CXCL2/PTPN1/CD44/EREG/CXCL3/IL1RN/IRAK2/IFNGR2/CCL20/TNF/CCL3/PTPN2/TRAF1/CXCL8/CCRL2/STAT3/IRF1/IL2RA/LILRA5/EGR1	30
GOBP_CELLULAR_RESPONSE_TO_MOLECULE_OF_BACTERIAL_ORIGIN	GOBP_CELLULAR_RESPONSE_TO_MOLECULE_OF_BACTERIAL_ORIGIN	GOBP_CELLULAR_RESPONSE_TO_MOLECULE_OF_BACTERIAL_ORIGIN	21/201	229/17872	1.47050166450339e-13	1.46216882173787e-10	1.04998978500505e-10	NLRP3/IL1B/TNFAIP3/NFKBIA/NFKB1/IL1A/HCK/CXCL2/ZFP36/CXCL3/PDE4B/IRAK2/TNIP3/CD55/TNF/CCL3/PRKCE/CXCL8/LITAF/TNIP1/TLR4	21
GOBP_CELLULAR_RESPONSE_TO_BIOTIC_STIMULUS	GOBP_CELLULAR_RESPONSE_TO_BIOTIC_STIMULUS	GOBP_CELLULAR_RESPONSE_TO_BIOTIC_STIMULUS	21/201	256/17872	1.30106227500915e-12	9.70267191588073e-10	6.96753086748321e-10	NLRP3/IL1B/TNFAIP3/NFKBIA/NFKB1/IL1A/HCK/CXCL2/ZFP36/CXCL3/PDE4B/IRAK2/TNIP3/CD55/TNF/CCL3/PRKCE/CXCL8/LITAF/TNIP1/TLR4	21
GOBP_REGULATION_OF_INFLAMMATORY_RESPONSE	GOBP_REGULATION_OF_INFLAMMATORY_RESPONSE	GOBP_REGULATION_OF_INFLAMMATORY_RESPONSE	24/201	397/17872	2.08960352458905e-11	1.24665746276983e-08	8.95230141587100e-09	NLRP3/IL1B/TNFAIP3/NFKBIA/NFKBIZ/NFKB1/FPR2/HCK/BIRC3/ZFP36/SCGB1A1/BCL6/LDLR/TNF/PIK3AP1/CCL3/PTPN2/TNFAIP6/PTGS2/TNIP1/IL2RA/LILRA5/TLR4/MEFV	24
GOBP_POSITIVE_REGULATION_OF_MAPK_CASCADE	GOBP_POSITIVE_REGULATION_OF_MAPK_CASCADE	GOBP_POSITIVE_REGULATION_OF_MAPK_CASCADE	25/201	492/17872	3.13420203461028e-10	1.46452960710506e-07	1.05168507523644e-07	IL1B/CCL4/CFLAR/FPR2/IL1A/PTPN1/CD44/THBS1/SLAMF1/PTEN/INSR/GPR183/RAPGEF2/CCL20/HIPK2/ICAM1/TNF/CCL3/GADD45B/TRAF1/PRKCE/AKAP13/FLT1/LILRA5/TLR4	25
GOBP_LEUKOCYTE_CELL_CELL_ADHESION	GOBP_LEUKOCYTE_CELL_CELL_ADHESION	GOBP_LEUKOCYTE_CELL_CELL_ADHESION	22/201	381/17872	3.62741985478825e-10	1.46452960710506e-07	1.05168507523644e-07	NLRP3/IL1B/PELI1/ZBTB16/NFKBIZ/IL1A/CD44/SCGB1A1/RHOH/SLAMF1/BCL6/CD55/ICAM1/TNF/PTPN2/NFAT5/PAG1/SDC4/HLA-DQA2/TNIP1/IRF1/IL2RA	22
GOBP_RESPONSE_TO_TUMOR_NECROSIS_FACTOR	GOBP_RESPONSE_TO_TUMOR_NECROSIS_FACTOR	GOBP_RESPONSE_TO_TUMOR_NECROSIS_FACTOR	18/201	248/17872	4.20237306825853e-10	1.46452960710506e-07	1.05168507523644e-07	TNFAIP3/NFKBIA/CCL4/NFKB1/GCH1/BIRC3/ZFP36/THBS1/CCL20/TNF/CCL3/PTPN2/TRAF1/NFE2L2/CXCL8/PTGS2/GBP2/CD58	18
GOBP_LEUKOCYTE_MIGRATION	GOBP_LEUKOCYTE_MIGRATION	GOBP_LEUKOCYTE_MIGRATION	22/201	385/17872	4.41862771168138e-10	1.46452960710506e-07	1.05168507523644e-07	IL1B/CCL4/FPR2/IL1A/HCK/CXCL2/THBS1/RHOH/SLAMF1/CXCL3/PDE4B/ADGRE2/GPR183/CCL20/DUSP1/CH25H/ICAM1/TNF/CCL3/CXCL8/TNFAIP6/FLT1	22
GOBP_I_KAPPAB_KINASE_NF_KAPPAB_SIGNALING	GOBP_I_KAPPAB_KINASE_NF_KAPPAB_SIGNALING	GOBP_I_KAPPAB_KINASE_NF_KAPPAB_SIGNALING	19/201	288/17872	6.7769028313815e-10	2.0215501146011e-07	1.4516839223012e-07	IL1B/TNFAIP3/PELI1/NFKBIA/CFLAR/IL1A/BIRC3/RHOH/IRAK2/TNIP3/TNF/TRAF1/PRKCE/REL/AKAP13/LITAF/TNIP1/TLR4/SLC44A2	19
GOBP_MYELOID_LEUKOCYTE_MIGRATION	GOBP_MYELOID_LEUKOCYTE_MIGRATION	GOBP_MYELOID_LEUKOCYTE_MIGRATION	17/201	230/17872	9.92920416214771e-10	2.69261963778969e-07	1.93358186315508e-07	IL1B/CCL4/FPR2/IL1A/CXCL2/THBS1/RHOH/SLAMF1/CXCL3/PDE4B/ADGRE2/CCL20/DUSP1/CCL3/CXCL8/TNFAIP6/FLT1	17
GOBP_LEUKOCYTE_CHEMOTAXIS	GOBP_LEUKOCYTE_CHEMOTAXIS	GOBP_LEUKOCYTE_CHEMOTAXIS	17/201	236/17872	1.47336644006303e-09	3.66254340892334e-07	2.63008833818268e-07	IL1B/CCL4/FPR2/CXCL2/THBS1/SLAMF1/CXCL3/PDE4B/ADGRE2/GPR183/CCL20/DUSP1/CH25H/CCL3/CXCL8/TNFAIP6/FLT1	17
GOBP_LIPOPOLYSACCHARIDE_MEDIATED_SIGNALING_PATHWAY	GOBP_LIPOPOLYSACCHARIDE_MEDIATED_SIGNALING_PATHWAY	GOBP_LIPOPOLYSACCHARIDE_MEDIATED_SIGNALING_PATHWAY	10/201	62/17872	1.67335248789077e-09	3.7313559059735e-07	2.67950289135136e-07	IL1B/TNFAIP3/NFKBIA/HCK/IRAK2/CD55/TNF/CCL3/PRKCE/TLR4	10
GOBP_TOLL_LIKE_RECEPTOR_SIGNALING_PATHWAY	GOBP_TOLL_LIKE_RECEPTOR_SIGNALING_PATHWAY	GOBP_TOLL_LIKE_RECEPTOR_SIGNALING_PATHWAY	13/201	126/17872	1.7512230199004e-09	3.7313559059735e-07	2.67950289135136e-07	TNFAIP3/PELI1/NFKBIA/IRAK3/BIRC3/IRAK2/TNIP3/TNF/PIK3AP1/PRKCE/TNIP1/IRF1/TLR4	13
GOBP_GRANULOCYTE_MIGRATION	GOBP_GRANULOCYTE_MIGRATION	GOBP_GRANULOCYTE_MIGRATION	14/201	154/17872	2.17955586434221e-09	4.3344100955552e-07	3.1125587255694e-07	IL1B/CCL4/IL1A/CXCL2/THBS1/RHOH/SLAMF1/CXCL3/PDE4B/ADGRE2/CCL20/CCL3/CXCL8/TNFAIP6	14
GOBP_NEGATIVE_REGULATION_OF_IMMUNE_SYSTEM_PROCESS	GOBP_NEGATIVE_REGULATION_OF_IMMUNE_SYSTEM_PROCESS	GOBP_NEGATIVE_REGULATION_OF_IMMUNE_SYSTEM_PROCESS	22/201	425/17872	2.79021745407248e-09	5.20201166593637e-07	3.73558718357729e-07	TNFAIP3/PELI1/SAMSN1/IRAK3/SERPINB9/HCK/THBS1/SCGB1A1/SLAMF1/BCL6/LDLR/DUSP1/CD55/TNF/CCL3/PTPN2/PAG1/SDC4/TNFAIP6/IRF1/IL2RA/TLR4	22
GOBP_CELLULAR_RESPONSE_TO_INTERLEUKIN_1	GOBP_CELLULAR_RESPONSE_TO_INTERLEUKIN_1	GOBP_CELLULAR_RESPONSE_TO_INTERLEUKIN_1	12/201	110/17872	3.95449022440208e-09	6.93896725846554e-07	4.98290254282244e-07	IL1B/IRAK3/CCL4/NFKB1/IL1R2/IL1RN/IRAK2/CCL20/CCL3/CXCL8/GBP2/EGR1	12
GOBP_RESPONSE_TO_INTERFERON_GAMMA	GOBP_RESPONSE_TO_INTERFERON_GAMMA	GOBP_RESPONSE_TO_INTERFERON_GAMMA	13/201	139/17872	5.87659692358702e-09	9.73882701281116e-07	6.99349399970737e-07	CCL4/GCH1/HCK/CCL20/TNF/CCL3/PTPN2/KYNU/GBP2/IRF1/CD58/TLR4/MEFV	13
GOBP_ERK1_AND_ERK2_CASCADE	GOBP_ERK1_AND_ERK2_CASCADE	GOBP_ERK1_AND_ERK2_CASCADE	19/201	341/17872	1.09896878022259e-08	1.72538098494947e-06	1.23900358324265e-06	IL1B/CCL4/CFLAR/FPR2/IL1A/PTPN1/CD44/SLAMF1/PTEN/GPR183/RAPGEF2/CCL20/ICAM1/TNF/CCL3/PTPN2/TNIP1/DUSP6/TLR4	19
GOBP_CELL_CHEMOTAXIS	GOBP_CELL_CHEMOTAXIS	GOBP_CELL_CHEMOTAXIS	18/201	315/17872	1.84879346275403e-08	2.75747544969764e-06	1.98015510352866e-06	IL1B/CCL4/FPR2/CXCL2/THBS1/SLAMF1/CXCL3/PDE4B/ADGRE2/GPR183/CCL20/DUSP1/CH25H/CCL3/CXCL8/TNFAIP6/CCRL2/FLT1	18
GOBP_GRANULOCYTE_CHEMOTAXIS	GOBP_GRANULOCYTE_CHEMOTAXIS	GOBP_GRANULOCYTE_CHEMOTAXIS	12/201	127/17872	2.04628343338956e-08	2.90669689609575e-06	2.08731167265552e-06	IL1B/CCL4/CXCL2/THBS1/SLAMF1/CXCL3/PDE4B/ADGRE2/CCL20/CCL3/CXCL8/TNFAIP6	12
GOBP_RESPONSE_TO_PEPTIDE	GOBP_RESPONSE_TO_PEPTIDE	GOBP_RESPONSE_TO_PEPTIDE	22/201	494/17872	4.21012820449211e-08	5.70855110636362e-06	4.09933535700548e-06	IL1B/TNFAIP3/NFKBIA/CFLAR/NFKB1/FPR2/AREG/PTPN1/EREG/INSR/ICAM1/TNF/PTPN2/ADM/NFE2L2/PTGS2/NAMPT/STAT3/BTG2/TLR4/CCND3/EGR1	22
GOBP_NEGATIVE_REGULATION_OF_INTERLEUKIN_12_PRODUCTION	GOBP_NEGATIVE_REGULATION_OF_INTERLEUKIN_12_PRODUCTION	GOBP_NEGATIVE_REGULATION_OF_INTERLEUKIN_12_PRODUCTION	6/201	19/17872	4.51080872973696e-08	5.85032280035015e-06	4.20114222655135e-06	IRAK3/NFKB1/THBS1/SLAMF1/LILRA5/MEFV	6
GOBP_REGULATION_OF_CELL_CELL_ADHESION	GOBP_REGULATION_OF_CELL_CELL_ADHESION	GOBP_REGULATION_OF_CELL_CELL_ADHESION	21/201	458/17872	5.32541071738719e-08	6.61904173748583e-06	4.75316263591357e-06	NLRP3/IL1B/PELI1/ZBTB16/NFKBIZ/IL1A/CD44/SCGB1A1/RHOH/SLAMF1/IL1RN/BCL6/CD55/TNF/PTPN2/NFAT5/PAG1/SDC4/HLA-DQA2/IRF1/IL2RA	21
GOBP_RESPONSE_TO_INTERLEUKIN_1	GOBP_RESPONSE_TO_INTERLEUKIN_1	GOBP_RESPONSE_TO_INTERLEUKIN_1	12/201	140/17872	6.10612513834968e-08	7.28582851507884e-06	5.23198511854383e-06	IL1B/IRAK3/CCL4/NFKB1/IL1R2/IL1RN/IRAK2/CCL20/CCL3/CXCL8/GBP2/EGR1	12
GOBP_IMMUNE_RESPONSE_REGULATING_SIGNALING_PATHWAY	GOBP_IMMUNE_RESPONSE_REGULATING_SIGNALING_PATHWAY	GOBP_IMMUNE_RESPONSE_REGULATING_SIGNALING_PATHWAY	21/201	479/17872	1.13466447756026e-07	1.30180928329317e-05	9.34834903576972e-06	TNFAIP3/PELI1/NFKBIA/IRAK3/NFKBIZ/FPR2/LCP2/HCK/BIRC3/PDE4B/IRAK2/TNIP3/TNF/PIK3AP1/PTPN2/PRKCE/TNIP1/IRF1/FPR1/TLR4/PRKCH	21
GOBP_PATTERN_RECOGNITION_RECEPTOR_SIGNALING_PATHWAY	GOBP_PATTERN_RECOGNITION_RECEPTOR_SIGNALING_PATHWAY	GOBP_PATTERN_RECOGNITION_RECEPTOR_SIGNALING_PATHWAY	13/201	180/17872	1.29512156251375e-07	1.4308694892513e-05	1.02751359832962e-05	TNFAIP3/PELI1/NFKBIA/IRAK3/BIRC3/IRAK2/TNIP3/TNF/PIK3AP1/PRKCE/TNIP1/IRF1/TLR4	13
GOBP_NEUTROPHIL_MIGRATION	GOBP_NEUTROPHIL_MIGRATION	GOBP_NEUTROPHIL_MIGRATION	11/201	128/17872	2.1406839013708e-07	2.28059288492468e-05	1.63770366138706e-05	IL1B/CCL4/IL1A/CXCL2/RHOH/CXCL3/PDE4B/CCL20/CCL3/CXCL8/TNFAIP6	11
GOBP_POSITIVE_REGULATION_OF_ERK1_AND_ERK2_CASCADE	GOBP_POSITIVE_REGULATION_OF_ERK1_AND_ERK2_CASCADE	GOBP_POSITIVE_REGULATION_OF_ERK1_AND_ERK2_CASCADE	14/201	223/17872	2.39022380604778e-07	2.45863365980708e-05	1.76555551553801e-05	CCL4/CFLAR/FPR2/IL1A/CD44/SLAMF1/PTEN/GPR183/RAPGEF2/CCL20/ICAM1/TNF/CCL3/TLR4	14
GOBP_REGULATION_OF_T_CELL_ACTIVATION	GOBP_REGULATION_OF_T_CELL_ACTIVATION	GOBP_REGULATION_OF_T_CELL_ACTIVATION	17/201	342/17872	3.43262458764937e-07	3.41317304831936e-05	2.45101439854964e-05	NLRP3/IL1B/PELI1/ZBTB16/NFKBIZ/IL1A/SCGB1A1/RHOH/SLAMF1/BCL6/CD55/PTPN2/PAG1/SDC4/HLA-DQA2/IRF1/IL2RA	17
GOBP_POSITIVE_REGULATION_OF_CELL_ACTIVATION	GOBP_POSITIVE_REGULATION_OF_CELL_ACTIVATION	GOBP_POSITIVE_REGULATION_OF_CELL_ACTIVATION	19/201	429/17872	4.03967988013183e-07	3.88721454272041e-05	2.79142565571079e-05	NLRP3/IL1B/PELI1/ZBTB16/NFKBIZ/IL1A/THBS1/RHOH/SLAMF1/BCL6/GPR183/CD55/TNF/CCL3/HLA-DQA2/IL2RA/PLEK/LILRA5/TLR4	19
GOBP_POSITIVE_REGULATION_OF_INTERLEUKIN_1_BETA_PRODUCTION	GOBP_POSITIVE_REGULATION_OF_INTERLEUKIN_1_BETA_PRODUCTION	GOBP_POSITIVE_REGULATION_OF_INTERLEUKIN_1_BETA_PRODUCTION	8/201	62/17872	4.47506439009926e-07	4.10383918833411e-05	2.94698475510698e-05	NLRP3/TNF/CCL3/STAT3/LILRA5/TLR4/MEFV/EGR1	8
GOBP_POSITIVE_REGULATION_OF_CYTOKINE_PRODUCTION	GOBP_POSITIVE_REGULATION_OF_CYTOKINE_PRODUCTION	GOBP_POSITIVE_REGULATION_OF_CYTOKINE_PRODUCTION	20/201	476/17872	4.53994948759723e-07	4.10383918833411e-05	2.94698475510698e-05	NLRP3/IL1B/PELI1/IRAK3/IL1A/THBS1/EREG/SLAMF1/PDE4B/CD55/TNF/CCL3/PTGS2/STAT3/IRF1/CD58/LILRA5/TLR4/MEFV/EGR1	20
GOBP_INTERLEUKIN_12_PRODUCTION	GOBP_INTERLEUKIN_12_PRODUCTION	GOBP_INTERLEUKIN_12_PRODUCTION	8/201	63/17872	5.07695997408138e-07	4.45428576549552e-05	3.19864196509462e-05	IRAK3/NFKB1/THBS1/SLAMF1/IRF1/LILRA5/TLR4/MEFV	8
GOBP_TOLL_LIKE_RECEPTOR_4_SIGNALING_PATHWAY	GOBP_TOLL_LIKE_RECEPTOR_4_SIGNALING_PATHWAY	GOBP_TOLL_LIKE_RECEPTOR_4_SIGNALING_PATHWAY	7/201	44/17872	5.52219482673895e-07	4.70648776233208e-05	3.37974931501166e-05	TNFAIP3/PELI1/NFKBIA/TNIP3/PIK3AP1/PRKCE/TLR4	7
GOBP_POSITIVE_REGULATION_OF_PROTEIN_KINASE_ACTIVITY	GOBP_POSITIVE_REGULATION_OF_PROTEIN_KINASE_ACTIVITY	GOBP_POSITIVE_REGULATION_OF_PROTEIN_KINASE_ACTIVITY	18/201	397/17872	5.89784574432911e-07	4.88702051537048e-05	3.50939066950577e-05	IL1B/ACSL1/LCP2/AREG/PTPN1/THBS1/EREG/INSR/RAPGEF2/TNF/AKAP13/SDC4/SNX9/FLT1/LILRA5/TLR4/CCND3/EGR1	18
GOBP_RESPONSE_TO_OXYGEN_LEVELS	GOBP_RESPONSE_TO_OXYGEN_LEVELS	GOBP_RESPONSE_TO_OXYGEN_LEVELS	16/201	320/17872	7.12438599481443e-07	5.74379551960309e-05	4.12464452331362e-05	SOD2/CFLAR/PMAIP1/IL1A/THBS1/PTEN/HIPK2/TNF/PLK3/PRKCE/ADM/NFE2L2/PTGS2/KCNMA1/BACH1/EGR1	16
GOBP_POSITIVE_REGULATION_OF_LEUKOCYTE_CELL_CELL_ADHESION	GOBP_POSITIVE_REGULATION_OF_LEUKOCYTE_CELL_CELL_ADHESION	GOBP_POSITIVE_REGULATION_OF_LEUKOCYTE_CELL_CELL_ADHESION	14/201	245/17872	7.46758267077747e-07	5.86205239656031e-05	4.20956530056292e-05	NLRP3/IL1B/ZBTB16/NFKBIZ/IL1A/CD44/RHOH/SLAMF1/BCL6/CD55/TNF/NFAT5/HLA-DQA2/IL2RA	14
GOBP_CELLULAR_RESPONSE_TO_INTERFERON_GAMMA	GOBP_CELLULAR_RESPONSE_TO_INTERFERON_GAMMA	GOBP_CELLULAR_RESPONSE_TO_INTERFERON_GAMMA	10/201	117/17872	8.12424267347078e-07	6.21400407563163e-05	4.46230333077275e-05	CCL4/HCK/CCL20/TNF/CCL3/PTPN2/GBP2/IRF1/CD58/TLR4	10
GOBP_INTERLEUKIN_1_MEDIATED_SIGNALING_PATHWAY	GOBP_INTERLEUKIN_1_MEDIATED_SIGNALING_PATHWAY	GOBP_INTERLEUKIN_1_MEDIATED_SIGNALING_PATHWAY	6/201	30/17872	8.90459592876223e-07	6.64060241387443e-05	4.76864545132398e-05	IL1B/IRAK3/IL1R2/IL1RN/IRAK2/EGR1	6
GOBP_REGULATION_OF_LEUKOCYTE_MIGRATION	GOBP_REGULATION_OF_LEUKOCYTE_MIGRATION	GOBP_REGULATION_OF_LEUKOCYTE_MIGRATION	13/201	219/17872	1.22554333419688e-06	8.91657503880316e-05	6.40303128392979e-05	CCL4/FPR2/IL1A/THBS1/RHOH/SLAMF1/CCL20/DUSP1/ICAM1/TNF/CCL3/CXCL8/TNFAIP6	13
GOBP_POSITIVE_REGULATION_OF_I_KAPPAB_KINASE_NF_KAPPAB_SIGNALING	GOBP_POSITIVE_REGULATION_OF_I_KAPPAB_KINASE_NF_KAPPAB_SIGNALING	GOBP_POSITIVE_REGULATION_OF_I_KAPPAB_KINASE_NF_KAPPAB_SIGNALING	12/201	188/17872	1.48878058074971e-06	0.000105738868389914	7.59315408978864e-05	IL1B/PELI1/CFLAR/IL1A/BIRC3/TNF/PRKCE/REL/AKAP13/LITAF/TLR4/SLC44A2	12
GOBP_POSITIVE_REGULATION_OF_INTERLEUKIN_1_PRODUCTION	GOBP_POSITIVE_REGULATION_OF_INTERLEUKIN_1_PRODUCTION	GOBP_POSITIVE_REGULATION_OF_INTERLEUKIN_1_PRODUCTION	8/201	73/17872	1.60074200934553e-06	0.000111046823578552	7.97432065855117e-05	NLRP3/TNF/CCL3/STAT3/LILRA5/TLR4/MEFV/EGR1	8
GOBP_RESPONSE_TO_CORTICOSTEROID	GOBP_RESPONSE_TO_CORTICOSTEROID	GOBP_RESPONSE_TO_CORTICOSTEROID	11/201	157/17872	1.65731198469731e-06	0.000112358219326183	8.068492557079e-05	CFLAR/ZFP36/AREG/SCGB1A1/IL1RN/KLF9/TNF/ADM/PTGS2/MT-ND3/EIF4E	11
GOBP_POSITIVE_REGULATION_OF_KINASE_ACTIVITY	GOBP_POSITIVE_REGULATION_OF_KINASE_ACTIVITY	GOBP_POSITIVE_REGULATION_OF_KINASE_ACTIVITY	19/201	477/17872	1.97039246729134e-06	0.000130615127331779	9.37952905482542e-05	IL1B/FPR2/ACSL1/LCP2/AREG/PTPN1/THBS1/EREG/INSR/RAPGEF2/TNF/AKAP13/SDC4/SNX9/FLT1/LILRA5/TLR4/CCND3/EGR1	19
GOBP_REGULATION_OF_INNATE_IMMUNE_RESPONSE	GOBP_REGULATION_OF_INNATE_IMMUNE_RESPONSE	GOBP_REGULATION_OF_INNATE_IMMUNE_RESPONSE	13/201	230/17872	2.11757181384669e-06	0.00013571161953048	9.74551037438565e-05	TNFAIP3/IRAK3/FPR2/SERPINB9/HCK/BIRC3/PTPN1/EREG/N4BP1/PTPN2/NFE2L2/IRF1/TLR4	13
GOBP_INTERLEUKIN_1_PRODUCTION	GOBP_INTERLEUKIN_1_PRODUCTION	GOBP_INTERLEUKIN_1_PRODUCTION	10/201	130/17872	2.13826554406054e-06	0.00013571161953048	9.74551037438565e-05	NLRP3/TNFAIP3/IL1R2/TNF/CCL3/STAT3/LILRA5/TLR4/MEFV/EGR1	10
GOBP_MYELOID_LEUKOCYTE_ACTIVATION	GOBP_MYELOID_LEUKOCYTE_ACTIVATION	GOBP_MYELOID_LEUKOCYTE_ACTIVATION	13/201	234/17872	2.5630384479877e-06	0.000159282160215569	0.000114381211439802	FPR2/LCP2/THBS1/RHOH/SLAMF1/LDLR/IFNGR2/ADGRE2/TNF/CCL3/PRKCE/CXCL8/TLR4	13
GOBP_MONONUCLEAR_CELL_MIGRATION	GOBP_MONONUCLEAR_CELL_MIGRATION	GOBP_MONONUCLEAR_CELL_MIGRATION	12/201	199/17872	2.698886655817e-06	0.000164301610087798	0.000117985700205963	CCL4/FPR2/THBS1/SLAMF1/GPR183/CCL20/DUSP1/CH25H/ICAM1/TNF/CCL3/FLT1	12
GOBP_NEUTROPHIL_CHEMOTAXIS	GOBP_NEUTROPHIL_CHEMOTAXIS	GOBP_NEUTROPHIL_CHEMOTAXIS	9/201	105/17872	2.84956965603355e-06	0.000170005325678962	0.00012208156315849	IL1B/CCL4/CXCL2/CXCL3/PDE4B/CCL20/CCL3/CXCL8/TNFAIP6	9
GOBP_POSITIVE_REGULATION_OF_CELL_ADHESION	GOBP_POSITIVE_REGULATION_OF_CELL_ADHESION	GOBP_POSITIVE_REGULATION_OF_CELL_ADHESION	18/201	446/17872	3.09133186639464e-06	0.000180812607008926	0.000129842318846503	NLRP3/IL1B/ZBTB16/NFKBIZ/IL1A/CD44/RHOH/SLAMF1/FMN1/BCL6/RIN2/CD55/TNF/NFAT5/PRKCE/SDC4/HLA-DQA2/IL2RA	18
GOBP_NEGATIVE_REGULATION_OF_CYTOKINE_PRODUCTION	GOBP_NEGATIVE_REGULATION_OF_CYTOKINE_PRODUCTION	GOBP_NEGATIVE_REGULATION_OF_CYTOKINE_PRODUCTION	16/201	365/17872	3.94034541529729e-06	0.000226039430265996	0.000162319897168623	NLRP3/TNFAIP3/IRAK3/NFKB1/IL1R2/ZFP36/THBS1/SCGB1A1/SLAMF1/N4BP1/BCL6/TNF/REL/LILRA5/TLR4/MEFV	16
GOBP_REGULATION_OF_APOPTOTIC_SIGNALING_PATHWAY	GOBP_REGULATION_OF_APOPTOTIC_SIGNALING_PATHWAY	GOBP_REGULATION_OF_APOPTOTIC_SIGNALING_PATHWAY	16/201	367/17872	4.22438380758456e-06	0.000237761073547637	0.000170737260147658	IL1B/TNFAIP3/SOD2/CFLAR/PMAIP1/IL1A/PTPN1/CD44/THBS1/PTEN/ICAM1/TNF/PTPN2/TRAF1/NFE2L2/PTGS2	16
GOBP_POSITIVE_REGULATION_OF_LEUKOCYTE_MIGRATION	GOBP_POSITIVE_REGULATION_OF_LEUKOCYTE_MIGRATION	GOBP_POSITIVE_REGULATION_OF_LEUKOCYTE_MIGRATION	10/201	141/17872	4.45338358964606e-06	0.000246008208294707	0.000176659563448923	CCL4/FPR2/IL1A/THBS1/SLAMF1/CCL20/ICAM1/TNF/CCL3/CXCL8	10
GOBP_FEVER_GENERATION	GOBP_FEVER_GENERATION	GOBP_FEVER_GENERATION	4/201	11/17872	4.81731287191432e-06	0.00026127353267128	0.000187621659221926	IL1B/IL1A/TNF/PTGS2	4
GOBP_REGULATION_OF_HEMOPOIESIS	GOBP_REGULATION_OF_HEMOPOIESIS	GOBP_REGULATION_OF_HEMOPOIESIS	16/201	374/17872	5.36890939523388e-06	0.000285990298678262	0.000205370876302649	NLRP3/NFKBIA/ZBTB16/NFKBIZ/ZFP36/RHOH/BCL6/RBFOX2/TNF/CCL3/PTPN2/TNFAIP6/STAT3/IRF1/IL2RA/TLR4	16
GOBP_POSITIVE_REGULATION_OF_CELL_CELL_ADHESION	GOBP_POSITIVE_REGULATION_OF_CELL_CELL_ADHESION	GOBP_POSITIVE_REGULATION_OF_CELL_CELL_ADHESION	14/201	291/17872	5.61732923692769e-06	0.000293973563399216	0.000211103693391465	NLRP3/IL1B/ZBTB16/NFKBIZ/IL1A/CD44/RHOH/SLAMF1/BCL6/CD55/TNF/NFAT5/HLA-DQA2/IL2RA	14
GOBP_POSITIVE_REGULATION_OF_INFLAMMATORY_RESPONSE	GOBP_POSITIVE_REGULATION_OF_INFLAMMATORY_RESPONSE	GOBP_POSITIVE_REGULATION_OF_INFLAMMATORY_RESPONSE	10/201	145/17872	5.71874845330107e-06	0.00029412114889995	0.000211209675180902	IL1B/NFKBIA/NFKBIZ/LDLR/TNF/CCL3/PTGS2/TNIP1/LILRA5/TLR4	10
GOBP_MYD88_DEPENDENT_TOLL_LIKE_RECEPTOR_SIGNALING_PATHWAY	GOBP_MYD88_DEPENDENT_TOLL_LIKE_RECEPTOR_SIGNALING_PATHWAY	GOBP_MYD88_DEPENDENT_TOLL_LIKE_RECEPTOR_SIGNALING_PATHWAY	5/201	24/17872	6.11487622667342e-06	0.00030916399634181	0.000222012009300275	IRAK3/IRAK2/TNIP1/IRF1/TLR4	5
GOBP_REGULATION_OF_LEUKOCYTE_PROLIFERATION	GOBP_REGULATION_OF_LEUKOCYTE_PROLIFERATION	GOBP_REGULATION_OF_LEUKOCYTE_PROLIFERATION	13/201	254/17872	6.28656090263635e-06	0.000312546852876071	0.000224441253278333	IL1B/TNFAIP3/PELI1/IL1A/SCGB1A1/SLAMF1/BCL6/GPR183/CD55/SDC4/IRF1/IL2RA/TLR4	13
GOBP_NEGATIVE_REGULATION_OF_INFLAMMATORY_RESPONSE	GOBP_NEGATIVE_REGULATION_OF_INFLAMMATORY_RESPONSE	GOBP_NEGATIVE_REGULATION_OF_INFLAMMATORY_RESPONSE	11/201	182/17872	6.93667964027156e-06	0.000339215006015247	0.000243591769938786	NLRP3/TNFAIP3/NFKB1/FPR2/HCK/ZFP36/LDLR/PTPN2/TNFAIP6/IL2RA/MEFV	11
GOBP_NEGATIVE_REGULATION_OF_RESPONSE_TO_EXTERNAL_STIMULUS	GOBP_NEGATIVE_REGULATION_OF_RESPONSE_TO_EXTERNAL_STIMULUS	GOBP_NEGATIVE_REGULATION_OF_RESPONSE_TO_EXTERNAL_STIMULUS	17/201	429/17872	7.47121789381764e-06	0.000359461983504161	0.000258131212460423	NLRP3/TNFAIP3/IRAK3/NFKB1/FPR2/SERPINB9/HCK/ZFP36/THBS1/PTEN/LDLR/DUSP1/TNF/PTPN2/TNFAIP6/IL2RA/MEFV	17
GOBP_POSITIVE_REGULATION_OF_NITRIC_OXIDE_METABOLIC_PROCESS	GOBP_POSITIVE_REGULATION_OF_NITRIC_OXIDE_METABOLIC_PROCESS	GOBP_POSITIVE_REGULATION_OF_NITRIC_OXIDE_METABOLIC_PROCESS	6/201	43/17872	8.09558198435069e-06	0.000383319381893938	0.000275263313920696	IL1B/SOD2/INSR/TNF/PTGS2/TLR4	6
GOBP_SECOND_MESSENGER_MEDIATED_SIGNALING	GOBP_SECOND_MESSENGER_MEDIATED_SIGNALING	GOBP_SECOND_MESSENGER_MEDIATED_SIGNALING	14/201	302/17872	8.57666008771174e-06	0.000399752766275689	0.000287064198659431	CCL4/FPR2/THBS1/MCTP1/RAPGEF2/CCL20/TNF/CCL3/NFAT5/ADM/CXCL8/CCRL2/FPR1/PLEK	14
GOBP_T_CELL_DIFFERENTIATION	GOBP_T_CELL_DIFFERENTIATION	GOBP_T_CELL_DIFFERENTIATION	13/201	263/17872	9.14946887072889e-06	0.000416157230129652	0.000298844315441481	NLRP3/IL1B/ZBTB16/NFKBIZ/IL1A/RHOH/BCL6/GPR183/PTPN2/STAT3/IRF1/IL2RA/EGR1	13
GOBP_REGULATION_OF_EXTRINSIC_APOPTOTIC_SIGNALING_PATHWAY	GOBP_REGULATION_OF_EXTRINSIC_APOPTOTIC_SIGNALING_PATHWAY	GOBP_REGULATION_OF_EXTRINSIC_APOPTOTIC_SIGNALING_PATHWAY	10/201	153/17872	9.20763566495374e-06	0.000416157230129652	0.000298844315441481	IL1B/TNFAIP3/CFLAR/PMAIP1/IL1A/THBS1/PTEN/ICAM1/TNF/TRAF1	10
GOBP_POSITIVE_REGULATION_OF_DNA_BINDING_TRANSCRIPTION_FACTOR_ACTIVITY	GOBP_POSITIVE_REGULATION_OF_DNA_BINDING_TRANSCRIPTION_FACTOR_ACTIVITY	GOBP_POSITIVE_REGULATION_OF_DNA_BINDING_TRANSCRIPTION_FACTOR_ACTIVITY	13/201	264/17872	9.52946887132771e-06	0.000424274711092098	0.000304673513796573	NLRP3/IL1B/IRAK3/CFLAR/PTEN/IRAK2/HIPK2/TNF/TRAF1/STAT3/TLR4/SAV1/PRKCH	13
GOBP_POSITIVE_REGULATION_OF_NF_KAPPAB_TRANSCRIPTION_FACTOR_ACTIVITY	GOBP_POSITIVE_REGULATION_OF_NF_KAPPAB_TRANSCRIPTION_FACTOR_ACTIVITY	GOBP_POSITIVE_REGULATION_OF_NF_KAPPAB_TRANSCRIPTION_FACTOR_ACTIVITY	10/201	154/17872	9.7518871028768e-06	0.000427792341586492	0.000307199539541088	NLRP3/IL1B/IRAK3/CFLAR/IRAK2/TNF/TRAF1/STAT3/TLR4/PRKCH	10
GOBP_NEGATIVE_REGULATION_OF_APOPTOTIC_SIGNALING_PATHWAY	GOBP_NEGATIVE_REGULATION_OF_APOPTOTIC_SIGNALING_PATHWAY	GOBP_NEGATIVE_REGULATION_OF_APOPTOTIC_SIGNALING_PATHWAY	12/201	227/17872	1.03923277640038e-05	0.000444299417625097	0.000319053342578849	IL1B/TNFAIP3/SOD2/CFLAR/IL1A/PTPN1/CD44/THBS1/ICAM1/TNF/NFE2L2/PTGS2	12
GOBP_REGULATION_OF_RESPONSE_TO_BIOTIC_STIMULUS	GOBP_REGULATION_OF_RESPONSE_TO_BIOTIC_STIMULUS	GOBP_REGULATION_OF_RESPONSE_TO_BIOTIC_STIMULUS	15/201	350/17872	1.04260674601934e-05	0.000444299417625097	0.000319053342578849	IL1B/TNFAIP3/IRAK3/FPR2/SERPINB9/HCK/BIRC3/PTPN1/EREG/N4BP1/CD55/PTPN2/NFE2L2/IRF1/TLR4	15
GOBP_POSITIVE_REGULATION_OF_RESPONSE_TO_EXTERNAL_STIMULUS	GOBP_POSITIVE_REGULATION_OF_RESPONSE_TO_EXTERNAL_STIMULUS	GOBP_POSITIVE_REGULATION_OF_RESPONSE_TO_EXTERNAL_STIMULUS	17/201	441/17872	1.07064044491937e-05	0.000449819781294997	0.000323017539719928	IL1B/NFKBIA/CCL4/NFKBIZ/FPR2/HCK/THBS1/EREG/SLAMF1/LDLR/TNF/CCL3/CXCL8/PTGS2/TNIP1/LILRA5/TLR4	17
GOBP_NEGATIVE_REGULATION_OF_DEFENSE_RESPONSE	GOBP_NEGATIVE_REGULATION_OF_DEFENSE_RESPONSE	GOBP_NEGATIVE_REGULATION_OF_DEFENSE_RESPONSE	13/201	268/17872	1.11922800681658e-05	0.00046370238115748	0.000332986695010488	NLRP3/TNFAIP3/IRAK3/NFKB1/FPR2/SERPINB9/HCK/ZFP36/LDLR/PTPN2/TNFAIP6/IL2RA/MEFV	13
GOBP_POSITIVE_REGULATION_OF_JNK_CASCADE	GOBP_POSITIVE_REGULATION_OF_JNK_CASCADE	GOBP_POSITIVE_REGULATION_OF_JNK_CASCADE	8/201	95/17872	1.17210803945488e-05	0.000478958668725193	0.000343942301411778	IL1B/IL1A/SLAMF1/HIPK2/TNF/GADD45B/TRAF1/TLR4	8
GOBP_RESPONSE_TO_CHEMOKINE	GOBP_RESPONSE_TO_CHEMOKINE	GOBP_RESPONSE_TO_CHEMOKINE	8/201	96/17872	1.26646995123891e-05	0.000510524306019684	0.000366609722727052	CCL4/CXCL2/CXCL3/CCL20/DUSP1/CCL3/CXCL8/CCRL2	8
GOBP_RESPONSE_TO_PEPTIDE_HORMONE	GOBP_RESPONSE_TO_PEPTIDE_HORMONE	GOBP_RESPONSE_TO_PEPTIDE_HORMONE	16/201	404/17872	1.4077663362772e-05	0.000557872830295849	0.000400610903771213	IL1B/CFLAR/NFKB1/AREG/PTPN1/EREG/INSR/PTPN2/ADM/NFE2L2/PTGS2/NAMPT/STAT3/BTG2/CCND3/EGR1	16
GOBP_REGULATION_OF_DNA_BINDING_TRANSCRIPTION_FACTOR_ACTIVITY	GOBP_REGULATION_OF_DNA_BINDING_TRANSCRIPTION_FACTOR_ACTIVITY	GOBP_REGULATION_OF_DNA_BINDING_TRANSCRIPTION_FACTOR_ACTIVITY	17/201	451/17872	1.43055410332483e-05	0.000557872830295849	0.000400610903771213	NLRP3/IL1B/TNFAIP3/PELI1/NFKBIA/IRAK3/CFLAR/HCK/PTEN/IRAK2/HIPK2/TNF/TRAF1/STAT3/TLR4/SAV1/PRKCH	17
GOBP_NEGATIVE_REGULATION_OF_LYMPHOCYTE_ACTIVATION	GOBP_NEGATIVE_REGULATION_OF_LYMPHOCYTE_ACTIVATION	GOBP_NEGATIVE_REGULATION_OF_LYMPHOCYTE_ACTIVATION	10/201	161/17872	1.44003378923166e-05	0.000557872830295849	0.000400610903771213	TNFAIP3/PELI1/SAMSN1/SCGB1A1/BCL6/PTPN2/PAG1/SDC4/IRF1/IL2RA	10
GOBP_RESPONSE_TO_MECHANICAL_STIMULUS	GOBP_RESPONSE_TO_MECHANICAL_STIMULUS	GOBP_RESPONSE_TO_MECHANICAL_STIMULUS	11/201	201/17872	1.76989537676811e-05	0.000673254948550088	0.000483467304303132	IL1B/NFKBIA/NFKB1/THBS1/SLC1A3/TNF/PTGS2/KCNJ2/IRF1/BTG2/TLR4	11
GOBP_CELLULAR_RESPONSE_TO_OXYGEN_LEVELS	GOBP_CELLULAR_RESPONSE_TO_OXYGEN_LEVELS	GOBP_CELLULAR_RESPONSE_TO_OXYGEN_LEVELS	10/201	165/17872	1.78300841218428e-05	0.000673254948550088	0.000483467304303132	CFLAR/PMAIP1/PTEN/HIPK2/PLK3/PRKCE/NFE2L2/PTGS2/BACH1/EGR1	10
GOBP_CYTOKINE_PRODUCTION_INVOLVED_IN_IMMUNE_RESPONSE	GOBP_CYTOKINE_PRODUCTION_INVOLVED_IN_IMMUNE_RESPONSE	GOBP_CYTOKINE_PRODUCTION_INVOLVED_IN_IMMUNE_RESPONSE	8/201	101/17872	1.83994055361949e-05	0.000686067833930866	0.000492668292975744	NLRP3/IL1B/IRAK3/SLAMF1/BCL6/CD55/TNF/TLR4	8
GOBP_VIRAL_PROCESS	GOBP_VIRAL_PROCESS	GOBP_VIRAL_PROCESS	16/201	415/17872	1.95759164804827e-05	0.000719046894708769	0.00051635069983674	CCL4/ZFP36/SLAMF1/N4BP1/INSR/LDLR/ST6GALNAC3/CD55/CH25H/ISG20/ICAM1/TNF/CCL3/CXCL8/CTSB/TNIP1	16
GOBP_REGULATION_OF_EXTRINSIC_APOPTOTIC_SIGNALING_PATHWAY_VIA_DEATH_DOMAIN_RECEPTORS	GOBP_REGULATION_OF_EXTRINSIC_APOPTOTIC_SIGNALING_PATHWAY_VIA_DEATH_DOMAIN_RECEPTORS	GOBP_REGULATION_OF_EXTRINSIC_APOPTOTIC_SIGNALING_PATHWAY_VIA_DEATH_DOMAIN_RECEPTORS	6/201	50/17872	1.97659555367479e-05	0.000719046894708769	0.00051635069983674	TNFAIP3/CFLAR/PMAIP1/THBS1/PTEN/ICAM1	6
GOBP_RESPONSE_TO_STEROID_HORMONE	GOBP_RESPONSE_TO_STEROID_HORMONE	GOBP_RESPONSE_TO_STEROID_HORMONE	14/201	330/17872	2.31457458099813e-05	0.000831852527122579	0.000597356914690068	CFLAR/ZFP36/AREG/THBS1/SCGB1A1/IL1RN/ATP1A1/RBFOX2/KLF9/TNF/ADM/PTGS2/MT-ND3/EIF4E	14
GOBP_LEUKOCYTE_PROLIFERATION	GOBP_LEUKOCYTE_PROLIFERATION	GOBP_LEUKOCYTE_PROLIFERATION	14/201	331/17872	2.39319091486317e-05	0.0008382195442784	0.00060192909737867	IL1B/TNFAIP3/PELI1/IL1A/SCGB1A1/SLAMF1/BCL6/GPR183/CD55/SDC4/IRF1/IL2RA/TLR4/CCND3	14
GOBP_POSITIVE_REGULATION_OF_DEFENSE_RESPONSE	GOBP_POSITIVE_REGULATION_OF_DEFENSE_RESPONSE	GOBP_POSITIVE_REGULATION_OF_DEFENSE_RESPONSE	13/201	288/17872	2.39439831234333e-05	0.0008382195442784	0.00060192909737867	IL1B/NFKBIA/NFKBIZ/FPR2/HCK/EREG/LDLR/TNF/CCL3/PTGS2/TNIP1/LILRA5/TLR4	13
GOBP_REGULATION_OF_PROTEIN_SERINE_THREONINE_KINASE_ACTIVITY	GOBP_REGULATION_OF_PROTEIN_SERINE_THREONINE_KINASE_ACTIVITY	GOBP_REGULATION_OF_PROTEIN_SERINE_THREONINE_KINASE_ACTIVITY	15/201	376/17872	2.41659003714188e-05	0.0008382195442784	0.00060192909737867	IL1B/TNFAIP3/IRAK3/ACSL1/PTPN1/THBS1/PTEN/INSR/RAPGEF2/DUSP1/TNF/AKAP13/FLT1/TLR4/CCND3	15
GOBP_PEPTIDYL_TYROSINE_MODIFICATION	GOBP_PEPTIDYL_TYROSINE_MODIFICATION	GOBP_PEPTIDYL_TYROSINE_MODIFICATION	15/201	377/17872	2.4921150372249e-05	0.000854480362763434	0.000613606061797057	SAMSN1/HCK/AREG/PTPN1/CD44/EREG/INSR/HIPK2/TNF/PTPN2/PRKCE/TPST1/FLT1/LILRA5/ABL2	15
GOBP_HEAT_GENERATION	GOBP_HEAT_GENERATION	GOBP_HEAT_GENERATION	4/201	16/17872	2.54203419300093e-05	0.000855797851340281	0.000614552156069472	IL1B/IL1A/TNF/PTGS2	4
GOBP_INTERLEUKIN_6_PRODUCTION	GOBP_INTERLEUKIN_6_PRODUCTION	GOBP_INTERLEUKIN_6_PRODUCTION	10/201	172/17872	2.55333586219527e-05	0.000855797851340281	0.000614552156069472	IL1B/TNFAIP3/IRAK3/IL1A/EREG/SLAMF1/TNF/STAT3/LILRA5/TLR4	10
GOBP_MACROPHAGE_ACTIVATION	GOBP_MACROPHAGE_ACTIVATION	GOBP_MACROPHAGE_ACTIVATION	8/201	106/17872	2.61732792922056e-05	0.000867498801429435	0.000622954659177056	FPR2/THBS1/LDLR/IFNGR2/TNF/CCL3/PRKCE/TLR4	8
GOBP_POSITIVE_REGULATION_OF_PROTEIN_SERINE_THREONINE_KINASE_ACTIVITY	GOBP_POSITIVE_REGULATION_OF_PROTEIN_SERINE_THREONINE_KINASE_ACTIVITY	GOBP_POSITIVE_REGULATION_OF_PROTEIN_SERINE_THREONINE_KINASE_ACTIVITY	11/201	210/17872	2.65697618344942e-05	0.000870962632442814	0.000625442051280459	IL1B/ACSL1/PTPN1/THBS1/INSR/RAPGEF2/TNF/AKAP13/FLT1/TLR4/CCND3	11
GOBP_NEGATIVE_REGULATION_OF_CELL_ACTIVATION	GOBP_NEGATIVE_REGULATION_OF_CELL_ACTIVATION	GOBP_NEGATIVE_REGULATION_OF_CELL_ACTIVATION	11/201	216/17872	3.44230530263591e-05	0.00111613007801771	0.000801497859366599	TNFAIP3/PELI1/SAMSN1/SCGB1A1/BCL6/LDLR/PTPN2/PAG1/SDC4/IRF1/IL2RA	11
GOBP_NIK_NF_KAPPAB_SIGNALING	GOBP_NIK_NF_KAPPAB_SIGNALING	GOBP_NIK_NF_KAPPAB_SIGNALING	9/201	144/17872	3.69924189741982e-05	0.00118654178279606	0.000852060810554538	NLRP3/IL1B/NFKBIA/BIRC3/TNF/NFAT5/REL/LITAF/TLR4	9
GOBP_REACTIVE_NITROGEN_SPECIES_METABOLIC_PROCESS	GOBP_REACTIVE_NITROGEN_SPECIES_METABOLIC_PROCESS	GOBP_REACTIVE_NITROGEN_SPECIES_METABOLIC_PROCESS	7/201	82/17872	3.82014039226357e-05	0.00121228497767258	0.000870547110667006	IL1B/SOD2/GCH1/INSR/TNF/PTGS2/TLR4	7
GOBP_NEGATIVE_REGULATION_OF_PHOSPHORUS_METABOLIC_PROCESS	GOBP_NEGATIVE_REGULATION_OF_PHOSPHORUS_METABOLIC_PROCESS	GOBP_NEGATIVE_REGULATION_OF_PHOSPHORUS_METABOLIC_PROCESS	16/201	442/17872	4.19037130942437e-05	0.00129132772791931	0.00092730805311354	IL1B/TNFAIP3/SAMSN1/IRAK3/PTPN1/PPP1R15A/PTEN/ENSA/DUSP1/TNF/GADD45B/PTPN2/STAT3/DUSP6/PLEK/LDLRAD4	16
GOBP_PERK_MEDIATED_UNFOLDED_PROTEIN_RESPONSE	GOBP_PERK_MEDIATED_UNFOLDED_PROTEIN_RESPONSE	GOBP_PERK_MEDIATED_UNFOLDED_PROTEIN_RESPONSE	4/201	18/17872	4.19921438348612e-05	0.00129132772791931	0.00092730805311354	PTPN1/PPP1R15A/PTPN2/NFE2L2	4
GOBP_POSITIVE_REGULATION_OF_RESPONSE_TO_ENDOPLASMIC_RETICULUM_STRESS	GOBP_POSITIVE_REGULATION_OF_RESPONSE_TO_ENDOPLASMIC_RETICULUM_STRESS	GOBP_POSITIVE_REGULATION_OF_RESPONSE_TO_ENDOPLASMIC_RETICULUM_STRESS	5/201	35/17872	4.22388112838633e-05	0.00129132772791931	0.00092730805311354	PMAIP1/PTPN1/PTPN2/ATF6/NFE2L2	5
GOBP_EXTRINSIC_APOPTOTIC_SIGNALING_PATHWAY	GOBP_EXTRINSIC_APOPTOTIC_SIGNALING_PATHWAY	GOBP_EXTRINSIC_APOPTOTIC_SIGNALING_PATHWAY	11/201	221/17872	4.24237738304032e-05	0.00129132772791931	0.00092730805311354	IL1B/TNFAIP3/CFLAR/BCL2A1/PMAIP1/IL1A/THBS1/PTEN/ICAM1/TNF/TRAF1	11
GOBP_EXTRINSIC_APOPTOTIC_SIGNALING_PATHWAY_VIA_DEATH_DOMAIN_RECEPTORS	GOBP_EXTRINSIC_APOPTOTIC_SIGNALING_PATHWAY_VIA_DEATH_DOMAIN_RECEPTORS	GOBP_EXTRINSIC_APOPTOTIC_SIGNALING_PATHWAY_VIA_DEATH_DOMAIN_RECEPTORS	7/201	85/17872	4.82087524575833e-05	0.00143806708580971	0.00103268222369665	TNFAIP3/CFLAR/PMAIP1/THBS1/PTEN/ICAM1/TNF	7
GOBP_NEGATIVE_REGULATION_OF_CYSTEINE_TYPE_ENDOPEPTIDASE_ACTIVITY	GOBP_NEGATIVE_REGULATION_OF_CYSTEINE_TYPE_ENDOPEPTIDASE_ACTIVITY	GOBP_NEGATIVE_REGULATION_OF_CYSTEINE_TYPE_ENDOPEPTIDASE_ACTIVITY	7/201	85/17872	4.82087524575833e-05	0.00143806708580971	0.00103268222369665	SERPINB9/BIRC3/CD44/THBS1/TNFAIP8/TNF/PTGS2	7
GOBP_REGULATION_OF_MONONUCLEAR_CELL_MIGRATION	GOBP_REGULATION_OF_MONONUCLEAR_CELL_MIGRATION	GOBP_REGULATION_OF_MONONUCLEAR_CELL_MIGRATION	8/201	116/17872	5.01051826568092e-05	0.00147983920658675	0.00106267896515484	CCL4/FPR2/THBS1/SLAMF1/CCL20/DUSP1/TNF/CCL3	8
GOBP_POSITIVE_REGULATION_OF_NUCLEAR_DIVISION	GOBP_POSITIVE_REGULATION_OF_NUCLEAR_DIVISION	GOBP_POSITIVE_REGULATION_OF_NUCLEAR_DIVISION	6/201	59/17872	5.15325217862008e-05	0.00150707365184546	0.00108223613864725	IL1B/OOEP/IL1A/EREG/INSR/TNF	6
GOBP_REGULATION_OF_MAP_KINASE_ACTIVITY	GOBP_REGULATION_OF_MAP_KINASE_ACTIVITY	GOBP_REGULATION_OF_MAP_KINASE_ACTIVITY	10/201	187/17872	5.20611225314521e-05	0.00150775076224584	0.00108272237456827	IL1B/IRAK3/PTPN1/THBS1/INSR/DUSP1/TNF/AKAP13/FLT1/TLR4	10
GOBP_REGULATION_OF_ADAPTIVE_IMMUNE_RESPONSE	GOBP_REGULATION_OF_ADAPTIVE_IMMUNE_RESPONSE	GOBP_REGULATION_OF_ADAPTIVE_IMMUNE_RESPONSE	10/201	188/17872	5.44554804453355e-05	0.00154705426827082	0.00111094639304519	NLRP3/IL1B/TNFAIP3/SAMSN1/NFKBIZ/SLAMF1/BCL6/CD55/TNF/IRF1	10
GOBP_TUMOR_NECROSIS_FACTOR_SUPERFAMILY_CYTOKINE_PRODUCTION	GOBP_TUMOR_NECROSIS_FACTOR_SUPERFAMILY_CYTOKINE_PRODUCTION	GOBP_TUMOR_NECROSIS_FACTOR_SUPERFAMILY_CYTOKINE_PRODUCTION	10/201	188/17872	5.44554804453355e-05	0.00154705426827082	0.00111094639304519	TNFAIP3/IRAK3/IL1A/ZFP36/THBS1/SLAMF1/CCL3/STAT3/LILRA5/TLR4	10
GOBP_POSITIVE_REGULATION_OF_MAP_KINASE_ACTIVITY	GOBP_POSITIVE_REGULATION_OF_MAP_KINASE_ACTIVITY	GOBP_POSITIVE_REGULATION_OF_MAP_KINASE_ACTIVITY	8/201	118/17872	5.6601208983593e-05	0.00159284345658545	0.001143827808159	IL1B/PTPN1/THBS1/INSR/TNF/AKAP13/FLT1/TLR4	8
GOBP_POSITIVE_REGULATION_OF_LIPID_METABOLIC_PROCESS	GOBP_POSITIVE_REGULATION_OF_LIPID_METABOLIC_PROCESS	GOBP_POSITIVE_REGULATION_OF_LIPID_METABOLIC_PROCESS	9/201	153/17872	5.94346733136933e-05	0.00165694981770792	0.00118986286466666	IL1B/FPR2/IL1A/LDLR/TNF/PRKCE/ADM/PTGS2/FLT1	9
GOBP_REGULATION_OF_CYSTEINE_TYPE_ENDOPEPTIDASE_ACTIVITY	GOBP_REGULATION_OF_CYSTEINE_TYPE_ENDOPEPTIDASE_ACTIVITY	GOBP_REGULATION_OF_CYSTEINE_TYPE_ENDOPEPTIDASE_ACTIVITY	11/201	232/17872	6.58324093976515e-05	0.00181831552993699	0.0013057402838618	NLRP3/CFLAR/PMAIP1/SERPINB9/BIRC3/CD44/THBS1/TNFAIP8/TNF/PTGS2/MEFV	11
GOBP_CELLULAR_RESPONSE_TO_PEPTIDE	GOBP_CELLULAR_RESPONSE_TO_PEPTIDE	GOBP_CELLULAR_RESPONSE_TO_PEPTIDE	14/201	364/17872	6.71880780407227e-05	0.0018387342825273	0.00132040307883023	IL1B/CFLAR/NFKB1/FPR2/PTPN1/INSR/ICAM1/TNF/PTPN2/NFE2L2/NAMPT/STAT3/TLR4/CCND3	14
GOBP_HETEROTYPIC_CELL_CELL_ADHESION	GOBP_HETEROTYPIC_CELL_CELL_ADHESION	GOBP_HETEROTYPIC_CELL_CELL_ADHESION	6/201	62/17872	6.83704923250245e-05	0.00185408344186862	0.00133142537685574	IL1B/CD44/IL1RN/TNF/CD58/PKP2	6
GOBP_NEGATIVE_REGULATION_OF_MYELOID_CELL_DIFFERENTIATION	GOBP_NEGATIVE_REGULATION_OF_MYELOID_CELL_DIFFERENTIATION	GOBP_NEGATIVE_REGULATION_OF_MYELOID_CELL_DIFFERENTIATION	7/201	91/17872	7.46929248978434e-05	0.00200728824297538	0.00144144241030926	NFKBIA/ZBTB16/ZFP36/CCL3/PTPN2/TNFAIP6/TLR4	7
GOBP_POSITIVE_REGULATION_OF_LEUKOCYTE_PROLIFERATION	GOBP_POSITIVE_REGULATION_OF_LEUKOCYTE_PROLIFERATION	GOBP_POSITIVE_REGULATION_OF_LEUKOCYTE_PROLIFERATION	9/201	158/17872	7.62373985328881e-05	0.00203050142699647	0.00145811189863184	IL1B/PELI1/IL1A/SLAMF1/BCL6/GPR183/CD55/IL2RA/TLR4	9
GOBP_REGULATION_OF_LEUKOCYTE_CHEMOTAXIS	GOBP_REGULATION_OF_LEUKOCYTE_CHEMOTAXIS	GOBP_REGULATION_OF_LEUKOCYTE_CHEMOTAXIS	8/201	124/17872	8.04338282413963e-05	0.00212331070481491	0.00152475864435251	CCL4/FPR2/THBS1/SLAMF1/DUSP1/CCL3/CXCL8/TNFAIP6	8
GOBP_REGULATION_OF_NITRIC_OXIDE_METABOLIC_PROCESS	GOBP_REGULATION_OF_NITRIC_OXIDE_METABOLIC_PROCESS	GOBP_REGULATION_OF_NITRIC_OXIDE_METABOLIC_PROCESS	6/201	64/17872	8.18457027719475e-05	0.00214162922253263	0.00153791325153198	IL1B/SOD2/INSR/TNF/PTGS2/TLR4	6
GOBP_POSITIVE_REGULATION_OF_PROTEOLYSIS	GOBP_POSITIVE_REGULATION_OF_PROTEOLYSIS	GOBP_POSITIVE_REGULATION_OF_PROTEOLYSIS	14/201	373/17872	8.71251011241177e-05	0.00225994936220211	0.00162287945800988	NLRP3/IL1B/RNF144B/CFLAR/PMAIP1/RNF19B/PTEN/TNF/PLK3/NFE2L2/SNX9/TNIP1/STAT3/MEFV	14
GOBP_REGULATION_OF_LEUKOCYTE_DIFFERENTIATION	GOBP_REGULATION_OF_LEUKOCYTE_DIFFERENTIATION	GOBP_REGULATION_OF_LEUKOCYTE_DIFFERENTIATION	12/201	285/17872	9.61390395193659e-05	0.00244044213821826	0.00175249210483059	NLRP3/ZBTB16/NFKBIZ/RHOH/BCL6/TNF/CCL3/PTPN2/TNFAIP6/IRF1/IL2RA/TLR4	12
GOBP_INTEGRATED_STRESS_RESPONSE_SIGNALING	GOBP_INTEGRATED_STRESS_RESPONSE_SIGNALING	GOBP_INTEGRATED_STRESS_RESPONSE_SIGNALING	4/201	22/17872	9.69057917989458e-05	0.00244044213821826	0.00175249210483059	PTPN1/PPP1R15A/PTPN2/NFE2L2	4
GOBP_REGULATION_OF_HORMONE_BIOSYNTHETIC_PROCESS	GOBP_REGULATION_OF_HORMONE_BIOSYNTHETIC_PROCESS	GOBP_REGULATION_OF_HORMONE_BIOSYNTHETIC_PROCESS	4/201	22/17872	9.69057917989458e-05	0.00244044213821826	0.00175249210483059	NFKB1/ATP1A1/ADM/EGR1	4
GOBP_POSITIVE_REGULATION_OF_MONONUCLEAR_CELL_MIGRATION	GOBP_POSITIVE_REGULATION_OF_MONONUCLEAR_CELL_MIGRATION	GOBP_POSITIVE_REGULATION_OF_MONONUCLEAR_CELL_MIGRATION	6/201	66/17872	9.73558881823576e-05	0.00244044213821826	0.00175249210483059	CCL4/FPR2/SLAMF1/CCL20/TNF/CCL3	6
GOBP_CALCIUM_MEDIATED_SIGNALING	GOBP_CALCIUM_MEDIATED_SIGNALING	GOBP_CALCIUM_MEDIATED_SIGNALING	10/201	203/17872	0.000103334806652342	0.00256873106869948	0.00184461694331155	CCL4/FPR2/MCTP1/CCL20/TNF/CCL3/NFAT5/CXCL8/CCRL2/PLEK	10
GOBP_NEGATIVE_REGULATION_OF_EXTRINSIC_APOPTOTIC_SIGNALING_PATHWAY	GOBP_NEGATIVE_REGULATION_OF_EXTRINSIC_APOPTOTIC_SIGNALING_PATHWAY	GOBP_NEGATIVE_REGULATION_OF_EXTRINSIC_APOPTOTIC_SIGNALING_PATHWAY	7/201	97/17872	0.000112012041618696	0.00271726007265555	0.00195127626651165	IL1B/TNFAIP3/CFLAR/IL1A/THBS1/ICAM1/TNF	7
GOBP_POSITIVE_REGULATION_OF_INTERLEUKIN_6_PRODUCTION	GOBP_POSITIVE_REGULATION_OF_INTERLEUKIN_6_PRODUCTION	GOBP_POSITIVE_REGULATION_OF_INTERLEUKIN_6_PRODUCTION	7/201	97/17872	0.000112012041618696	0.00271726007265555	0.00195127626651165	IL1B/IL1A/EREG/TNF/STAT3/LILRA5/TLR4	7
GOBP_T_CELL_PROLIFERATION	GOBP_T_CELL_PROLIFERATION	GOBP_T_CELL_PROLIFERATION	10/201	205/17872	0.000112042570880534	0.00271726007265555	0.00195127626651165	IL1B/PELI1/IL1A/SCGB1A1/SLAMF1/CD55/SDC4/IRF1/IL2RA/CCND3	10
GOBP_ASTROCYTE_DEVELOPMENT	GOBP_ASTROCYTE_DEVELOPMENT	GOBP_ASTROCYTE_DEVELOPMENT	5/201	43/17872	0.000116439252802607	0.00280111525088852	0.00201149303440836	IL1B/FPR2/LDLR/TNF/TLR4	5
GOBP_REGULATION_OF_EPITHELIAL_CELL_APOPTOTIC_PROCESS	GOBP_REGULATION_OF_EPITHELIAL_CELL_APOPTOTIC_PROCESS	GOBP_REGULATION_OF_EPITHELIAL_CELL_APOPTOTIC_PROCESS	7/201	98/17872	0.000119494137596807	0.00285160809961021	0.00204775216850107	TNFAIP3/CFLAR/ZFP36/THBS1/ICAM1/TNF/NFE2L2	7
GOBP_MONONUCLEAR_CELL_DIFFERENTIATION	GOBP_MONONUCLEAR_CELL_DIFFERENTIATION	GOBP_MONONUCLEAR_CELL_DIFFERENTIATION	15/201	434/17872	0.000122148173390334	0.00289180953351879	0.00207662099289332	NLRP3/IL1B/ZBTB16/NFKBIZ/IL1A/KLF6/RHOH/SLAMF1/BCL6/GPR183/PTPN2/STAT3/IRF1/IL2RA/EGR1	15
GOBP_POSITIVE_REGULATION_OF_MITOTIC_NUCLEAR_DIVISION	GOBP_POSITIVE_REGULATION_OF_MITOTIC_NUCLEAR_DIVISION	GOBP_POSITIVE_REGULATION_OF_MITOTIC_NUCLEAR_DIVISION	5/201	44/17872	0.000130176767364293	0.00303749729041237	0.0021812400042307	IL1B/IL1A/EREG/INSR/TNF	5
GOBP_REGULATION_OF_MYELOID_CELL_DIFFERENTIATION	GOBP_REGULATION_OF_MYELOID_CELL_DIFFERENTIATION	GOBP_REGULATION_OF_MYELOID_CELL_DIFFERENTIATION	10/201	209/17872	0.000131331920989995	0.00303749729041237	0.0021812400042307	NFKBIA/ZBTB16/ZFP36/RBFOX2/TNF/CCL3/PTPN2/TNFAIP6/STAT3/TLR4	10
GOBP_POSITIVE_REGULATION_OF_STRESS_ACTIVATED_PROTEIN_KINASE_SIGNALING_CASCADE	GOBP_POSITIVE_REGULATION_OF_STRESS_ACTIVATED_PROTEIN_KINASE_SIGNALING_CASCADE	GOBP_POSITIVE_REGULATION_OF_STRESS_ACTIVATED_PROTEIN_KINASE_SIGNALING_CASCADE	8/201	133/17872	0.000131356738338316	0.00303749729041237	0.0021812400042307	IL1B/IL1A/SLAMF1/HIPK2/TNF/GADD45B/TRAF1/TLR4	8
GOBP_INTRINSIC_APOPTOTIC_SIGNALING_PATHWAY	GOBP_INTRINSIC_APOPTOTIC_SIGNALING_PATHWAY	GOBP_INTRINSIC_APOPTOTIC_SIGNALING_PATHWAY	12/201	295/17872	0.000132965191513921	0.00305103974066175	0.00219096489660591	SOD2/BCL2A1/PMAIP1/PTPN1/CD44/PPP1R15A/TP53BP2/HIPK2/TNF/PTPN2/NFE2L2/PTGS2	12
GOBP_CELLULAR_RESPONSE_TO_MECHANICAL_STIMULUS	GOBP_CELLULAR_RESPONSE_TO_MECHANICAL_STIMULUS	GOBP_CELLULAR_RESPONSE_TO_MECHANICAL_STIMULUS	6/201	70/17872	0.000135358062984051	0.00305888713546534	0.00219660014491662	IL1B/NFKB1/PTGS2/KCNJ2/IRF1/TLR4	6
GOBP_MONOCYTE_CHEMOTAXIS	GOBP_MONOCYTE_CHEMOTAXIS	GOBP_MONOCYTE_CHEMOTAXIS	6/201	70/17872	0.000135358062984051	0.00305888713546534	0.00219660014491662	CCL4/FPR2/CCL20/DUSP1/CCL3/FLT1	6
GOBP_REGULATION_OF_SMALL_MOLECULE_METABOLIC_PROCESS	GOBP_REGULATION_OF_SMALL_MOLECULE_METABOLIC_PROCESS	GOBP_REGULATION_OF_SMALL_MOLECULE_METABOLIC_PROCESS	13/201	342/17872	0.000137684307758457	0.00307897301429273	0.00221102390178933	IL1B/NFKB1/PMAIP1/INSR/LDLR/TNF/PTPN2/PRKCE/ADM/PTGS2/STAT3/PLEK/EGR1	13
GOBP_ASTROCYTE_ACTIVATION	GOBP_ASTROCYTE_ACTIVATION	GOBP_ASTROCYTE_ACTIVATION	4/201	24/17872	0.000138311224912915	0.00307897301429273	0.00221102390178933	IL1B/FPR2/LDLR/TNF	4
GOBP_STRESS_ACTIVATED_PROTEIN_KINASE_SIGNALING_CASCADE	GOBP_STRESS_ACTIVATED_PROTEIN_KINASE_SIGNALING_CASCADE	GOBP_STRESS_ACTIVATED_PROTEIN_KINASE_SIGNALING_CASCADE	11/201	253/17872	0.000142059564546593	0.00313899022994436	0.00225412252516427	IL1B/NFKB1/IL1A/ZFP36/SLAMF1/DUSP1/HIPK2/TNF/GADD45B/TRAF1/TLR4	11
GOBP_ER_NUCLEUS_SIGNALING_PATHWAY	GOBP_ER_NUCLEUS_SIGNALING_PATHWAY	GOBP_ER_NUCLEUS_SIGNALING_PATHWAY	5/201	45/17872	0.000145121900998285	0.00315984401954659	0.00226909772210149	PTPN1/PPP1R15A/PTPN2/ATF6/NFE2L2	5
GOBP_NEUROINFLAMMATORY_RESPONSE	GOBP_NEUROINFLAMMATORY_RESPONSE	GOBP_NEUROINFLAMMATORY_RESPONSE	5/201	45/17872	0.000145121900998285	0.00315984401954659	0.00226909772210149	IL1B/LDLR/TNF/CCL3/PTGS2	5
GOBP_REGULATION_OF_ACTIN_FILAMENT_BASED_PROCESS	GOBP_REGULATION_OF_ACTIN_FILAMENT_BASED_PROCESS	GOBP_REGULATION_OF_ACTIN_FILAMENT_BASED_PROCESS	14/201	392/17872	0.000146746916705101	0.00317207284442984	0.00227787929439269	IL1A/HCK/RHOH/FMN1/PDE4B/PRKCE/AKAP13/SDC4/SNX9/KCNJ2/PLEK/ABL2/MTSS1/PKP2	14
GOBP_MYELOID_CELL_DIFFERENTIATION	GOBP_MYELOID_CELL_DIFFERENTIATION	GOBP_MYELOID_CELL_DIFFERENTIATION	14/201	393/17872	0.000150683082078099	0.00323372398445302	0.00232215124595935	NFKBIA/ZBTB16/ZFP36/BCL6/RBFOX2/GPR183/HIPK2/TNF/CCL3/PTPN2/TNFAIP6/STAT3/TLR4/TET2	14
GOBP_POSITIVE_REGULATION_OF_HEPATOCYTE_PROLIFERATION	GOBP_POSITIVE_REGULATION_OF_HEPATOCYTE_PROLIFERATION	GOBP_POSITIVE_REGULATION_OF_HEPATOCYTE_PROLIFERATION	3/201	10/17872	0.000158665792776417	0.00336641259217785	0.00241743551178853	TNFAIP3/CFLAR/TNF	3
GOBP_REGULATION_OF_T_CELL_PROLIFERATION	GOBP_REGULATION_OF_T_CELL_PROLIFERATION	GOBP_REGULATION_OF_T_CELL_PROLIFERATION	9/201	174/17872	0.000159123089338611	0.00336641259217785	0.00241743551178853	IL1B/PELI1/IL1A/SCGB1A1/SLAMF1/CD55/SDC4/IRF1/IL2RA	9
GOBP_JNK_CASCADE	GOBP_JNK_CASCADE	GOBP_JNK_CASCADE	9/201	175/17872	0.000166144335737538	0.00346579408045508	0.00248880179040037	IL1B/NFKB1/IL1A/SLAMF1/HIPK2/TNF/GADD45B/TRAF1/TLR4	9
GOBP_REGULATION_OF_LIPID_BIOSYNTHETIC_PROCESS	GOBP_REGULATION_OF_LIPID_BIOSYNTHETIC_PROCESS	GOBP_REGULATION_OF_LIPID_BIOSYNTHETIC_PROCESS	9/201	175/17872	0.000166144335737538	0.00346579408045508	0.00248880179040037	IL1B/NFKB1/IL1A/ATP1A1/LDLR/TNF/ADM/PTGS2/EGR1	9
GOBP_REGULATION_OF_STEROID_BIOSYNTHETIC_PROCESS	GOBP_REGULATION_OF_STEROID_BIOSYNTHETIC_PROCESS	GOBP_REGULATION_OF_STEROID_BIOSYNTHETIC_PROCESS	6/201	73/17872	0.000170902358594067	0.00354028983115348	0.00254229751271145	NFKB1/IL1A/ATP1A1/TNF/ADM/EGR1	6
GOBP_REGULATION_OF_STEROID_METABOLIC_PROCESS	GOBP_REGULATION_OF_STEROID_METABOLIC_PROCESS	GOBP_REGULATION_OF_STEROID_METABOLIC_PROCESS	7/201	104/17872	0.000173381757452921	0.00356688125849699	0.00256139293224461	NFKB1/IL1A/ATP1A1/LDLR/TNF/ADM/EGR1	7
GOBP_REGULATION_OF_NUCLEAR_DIVISION	GOBP_REGULATION_OF_NUCLEAR_DIVISION	GOBP_REGULATION_OF_NUCLEAR_DIVISION	8/201	139/17872	0.000178232321374714	0.00362939640460483	0.00260628533033535	IL1B/OOEP/IL1A/EREG/INSR/DUSP1/TNF/TEX14	8
GOBP_MICROGLIAL_CELL_ACTIVATION	GOBP_MICROGLIAL_CELL_ACTIVATION	GOBP_MICROGLIAL_CELL_ACTIVATION	5/201	47/17872	0.000178917272407108	0.00362939640460483	0.00260628533033535	FPR2/LDLR/IFNGR2/TNF/CCL3	5
GOBP_TEMPERATURE_HOMEOSTASIS	GOBP_TEMPERATURE_HOMEOSTASIS	GOBP_TEMPERATURE_HOMEOSTASIS	9/201	177/17872	0.000180963710510824	0.00362939640460483	0.00260628533033535	IL1B/ACSL1/IL1A/TNF/PTGS2/STAT3/TLR4/KDM6B/EGR1	9
GOBP_NEGATIVE_REGULATION_OF_CELL_ADHESION	GOBP_NEGATIVE_REGULATION_OF_CELL_ADHESION	GOBP_NEGATIVE_REGULATION_OF_CELL_ADHESION	12/201	305/17872	0.000181287316220624	0.00362939640460483	0.00260628533033535	PELI1/THBS1/SCGB1A1/IL1RN/PTEN/BCL6/DUSP1/PTPN2/PAG1/SDC4/IRF1/IL2RA	12
GOBP_NUCLEOTIDE_BINDING_DOMAIN_LEUCINE_RICH_REPEAT_CONTAINING_RECEPTOR_SIGNALING_PATHWAY	GOBP_NUCLEOTIDE_BINDING_DOMAIN_LEUCINE_RICH_REPEAT_CONTAINING_RECEPTOR_SIGNALING_PATHWAY	GOBP_NUCLEOTIDE_BINDING_DOMAIN_LEUCINE_RICH_REPEAT_CONTAINING_RECEPTOR_SIGNALING_PATHWAY	4/201	26/17872	0.000191199286600092	0.0037522859995268	0.00269453288248744	TNFAIP3/NFKBIA/BIRC3/TLR4	4
GOBP_POSITIVE_REGULATION_OF_T_CELL_CYTOKINE_PRODUCTION	GOBP_POSITIVE_REGULATION_OF_T_CELL_CYTOKINE_PRODUCTION	GOBP_POSITIVE_REGULATION_OF_T_CELL_CYTOKINE_PRODUCTION	4/201	26/17872	0.000191199286600092	0.0037522859995268	0.00269453288248744	NLRP3/IL1B/SLAMF1/CD55	4
GOBP_REGULATION_OF_HETEROTYPIC_CELL_CELL_ADHESION	GOBP_REGULATION_OF_HETEROTYPIC_CELL_CELL_ADHESION	GOBP_REGULATION_OF_HETEROTYPIC_CELL_CELL_ADHESION	4/201	26/17872	0.000191199286600092	0.0037522859995268	0.00269453288248744	IL1B/CD44/IL1RN/TNF	4
GOBP_REGULATION_OF_JNK_CASCADE	GOBP_REGULATION_OF_JNK_CASCADE	GOBP_REGULATION_OF_JNK_CASCADE	8/201	141/17872	0.000196617306818326	0.00378876430568844	0.00272072811266509	IL1B/IL1A/SLAMF1/HIPK2/TNF/GADD45B/TRAF1/TLR4	8
GOBP_NEGATIVE_REGULATION_OF_IMMUNE_RESPONSE	GOBP_NEGATIVE_REGULATION_OF_IMMUNE_RESPONSE	GOBP_NEGATIVE_REGULATION_OF_IMMUNE_RESPONSE	9/201	179/17872	0.000196868410117904	0.00378876430568844	0.00272072811266509	TNFAIP3/SAMSN1/IRAK3/SERPINB9/HCK/SLAMF1/BCL6/CD55/PTPN2	9
GOBP_NEGATIVE_REGULATION_OF_MAPK_CASCADE	GOBP_NEGATIVE_REGULATION_OF_MAPK_CASCADE	GOBP_NEGATIVE_REGULATION_OF_MAPK_CASCADE	9/201	179/17872	0.000196868410117904	0.00378876430568844	0.00272072811266509	IL1B/IRAK3/PTPN1/PTEN/DUSP1/PTPN2/TNIP1/DUSP6/TLR4	9
GOBP_VASCULAR_PROCESS_IN_CIRCULATORY_SYSTEM	GOBP_VASCULAR_PROCESS_IN_CIRCULATORY_SYSTEM	GOBP_VASCULAR_PROCESS_IN_CIRCULATORY_SYSTEM	11/201	263/17872	0.000199126133317251	0.00380764907490615	0.00273428934750746	SOD2/GCH1/TBXAS1/SLC1A3/INSR/TNF/ADM/PTGS2/KCNMA1/SLC1A2/ECE1	11
GOBP_REGULATION_OF_TUBE_SIZE	GOBP_REGULATION_OF_TUBE_SIZE	GOBP_REGULATION_OF_TUBE_SIZE	8/201	142/17872	0.000206377711358307	0.00390590822394848	0.0028048496694374	SOD2/GCH1/TBXAS1/TNF/ADM/PTGS2/KCNMA1/ECE1	8
GOBP_CELLULAR_MONOVALENT_INORGANIC_CATION_HOMEOSTASIS	GOBP_CELLULAR_MONOVALENT_INORGANIC_CATION_HOMEOSTASIS	GOBP_CELLULAR_MONOVALENT_INORGANIC_CATION_HOMEOSTASIS	7/201	107/17872	0.000206883506330493	0.00390590822394848	0.0028048496694374	CLIC4/IL1A/SLC1A3/ATP1A1/TMEM165/KCNJ2/KCNMA1	7
GOBP_REGULATION_OF_PERK_MEDIATED_UNFOLDED_PROTEIN_RESPONSE	GOBP_REGULATION_OF_PERK_MEDIATED_UNFOLDED_PROTEIN_RESPONSE	GOBP_REGULATION_OF_PERK_MEDIATED_UNFOLDED_PROTEIN_RESPONSE	3/201	11/17872	0.000216358972740607	0.00405911204833478	0.0029148660015037	PTPN1/PPP1R15A/PTPN2	3
GOBP_NEGATIVE_REGULATION_OF_CYTOKINE_PRODUCTION_INVOLVED_IN_IMMUNE_RESPONSE	GOBP_NEGATIVE_REGULATION_OF_CYTOKINE_PRODUCTION_INVOLVED_IN_IMMUNE_RESPONSE	GOBP_NEGATIVE_REGULATION_OF_CYTOKINE_PRODUCTION_INVOLVED_IN_IMMUNE_RESPONSE	4/201	27/17872	0.000222486108829537	0.00414797539149068	0.00297867915439544	IRAK3/SLAMF1/BCL6/TNF	4
GOBP_NEGATIVE_REGULATION_OF_LEUKOCYTE_CELL_CELL_ADHESION	GOBP_NEGATIVE_REGULATION_OF_LEUKOCYTE_CELL_CELL_ADHESION	GOBP_NEGATIVE_REGULATION_OF_LEUKOCYTE_CELL_CELL_ADHESION	8/201	144/17872	0.000227093633502932	0.00420757955738662	0.00302148116494584	PELI1/SCGB1A1/BCL6/PTPN2/PAG1/SDC4/IRF1/IL2RA	8
GOBP_NEGATIVE_REGULATION_OF_ERK1_AND_ERK2_CASCADE	GOBP_NEGATIVE_REGULATION_OF_ERK1_AND_ERK2_CASCADE	GOBP_NEGATIVE_REGULATION_OF_ERK1_AND_ERK2_CASCADE	6/201	77/17872	0.000229342277838808	0.00422301243699485	0.00303256358285884	PTPN1/PTEN/PTPN2/TNIP1/DUSP6/TLR4	6
GOBP_POSITIVE_REGULATION_OF_VASCULATURE_DEVELOPMENT	GOBP_POSITIVE_REGULATION_OF_VASCULATURE_DEVELOPMENT	GOBP_POSITIVE_REGULATION_OF_VASCULATURE_DEVELOPMENT	9/201	183/17872	0.000232181744670724	0.00422315941678518	0.003032669129685	IL1B/IL1A/THBS1/HIPK2/ADM/NFE2L2/CXCL8/STAT3/FLT1	9
GOBP_REGULATION_OF_LIPID_LOCALIZATION	GOBP_REGULATION_OF_LIPID_LOCALIZATION	GOBP_REGULATION_OF_LIPID_LOCALIZATION	9/201	183/17872	0.000232181744670724	0.00422315941678518	0.003032669129685	IL1B/NFKBIA/NFKB1/ACSL1/IL1A/THBS1/EHD1/TNF/PTPN2	9
GOBP_POSITIVE_REGULATION_OF_SMALL_MOLECULE_METABOLIC_PROCESS	GOBP_POSITIVE_REGULATION_OF_SMALL_MOLECULE_METABOLIC_PROCESS	GOBP_POSITIVE_REGULATION_OF_SMALL_MOLECULE_METABOLIC_PROCESS	8/201	145/17872	0.000238073582898045	0.00429430719755632	0.00308376066024211	IL1B/PMAIP1/INSR/TNF/PTPN2/PRKCE/ADM/PTGS2	8
GOBP_REGULATION_OF_CHEMOTAXIS	GOBP_REGULATION_OF_CHEMOTAXIS	GOBP_REGULATION_OF_CHEMOTAXIS	10/201	225/17872	0.000238972509149966	0.00429430719755632	0.00308376066024211	CCL4/FPR2/THBS1/SLAMF1/GPR183/DUSP1/CCL3/PTPN2/CXCL8/TNFAIP6	10
GOBP_ALPHA_BETA_T_CELL_DIFFERENTIATION	GOBP_ALPHA_BETA_T_CELL_DIFFERENTIATION	GOBP_ALPHA_BETA_T_CELL_DIFFERENTIATION	7/201	111/17872	0.000259485968591642	0.0046074205018385	0.00330860868473679	NLRP3/ZBTB16/NFKBIZ/BCL6/GPR183/STAT3/IRF1	7
GOBP_REGULATION_OF_MITOTIC_NUCLEAR_DIVISION	GOBP_REGULATION_OF_MITOTIC_NUCLEAR_DIVISION	GOBP_REGULATION_OF_MITOTIC_NUCLEAR_DIVISION	7/201	111/17872	0.000259485968591642	0.0046074205018385	0.00330860868473679	IL1B/IL1A/EREG/INSR/DUSP1/TNF/TEX14	7
GOBP_REGULATION_OF_REACTIVE_OXYGEN_SPECIES_METABOLIC_PROCESS	GOBP_REGULATION_OF_REACTIVE_OXYGEN_SPECIES_METABOLIC_PROCESS	GOBP_REGULATION_OF_REACTIVE_OXYGEN_SPECIES_METABOLIC_PROCESS	8/201	147/17872	0.000261340343954839	0.00461288902968808	0.00331253565835003	SOD2/CFLAR/GCH1/FPR2/THBS1/TNF/NFE2L2/TLR4	8
GOBP_ASTROCYTE_DIFFERENTIATION	GOBP_ASTROCYTE_DIFFERENTIATION	GOBP_ASTROCYTE_DIFFERENTIATION	6/201	79/17872	0.00026392551995059	0.0046311166236036	0.00332562497275202	IL1B/FPR2/LDLR/TNF/STAT3/TLR4	6
GOBP_VIRAL_LIFE_CYCLE	GOBP_VIRAL_LIFE_CYCLE	GOBP_VIRAL_LIFE_CYCLE	12/201	318/17872	0.000265933184308106	0.00463905665959696	0.00333132674710369	SLAMF1/N4BP1/INSR/LDLR/CD55/CH25H/ISG20/ICAM1/TNF/CXCL8/CTSB/TNIP1	12
GOBP_RESPONSE_TO_OSMOTIC_STRESS	GOBP_RESPONSE_TO_OSMOTIC_STRESS	GOBP_RESPONSE_TO_OSMOTIC_STRESS	6/201	80/17872	0.000282687242776231	0.0049026514255901	0.00352061529406139	AQP9/TNF/NFAT5/PLK3/PTGS2/KCNMA1	6
GOBP_POSITIVE_REGULATION_OF_VASCULOGENESIS	GOBP_POSITIVE_REGULATION_OF_VASCULOGENESIS	GOBP_POSITIVE_REGULATION_OF_VASCULOGENESIS	3/201	12/17872	0.000286091170233481	0.00490465494716365	0.00352205403161001	RIN2/RAPGEF2/ADM	3
GOBP_REGULATION_OF_HEAT_GENERATION	GOBP_REGULATION_OF_HEAT_GENERATION	GOBP_REGULATION_OF_HEAT_GENERATION	3/201	12/17872	0.000286091170233481	0.00490465494716365	0.00352205403161001	IL1B/TNF/PTGS2	3
GOBP_REGULATION_OF_NIK_NF_KAPPAB_SIGNALING	GOBP_REGULATION_OF_NIK_NF_KAPPAB_SIGNALING	GOBP_REGULATION_OF_NIK_NF_KAPPAB_SIGNALING	7/201	113/17872	0.000289551390340737	0.00493561027077954	0.00354428318402046	NLRP3/IL1B/NFKBIA/TNF/NFAT5/LITAF/TLR4	7
GOBP_HYALURONAN_METABOLIC_PROCESS	GOBP_HYALURONAN_METABOLIC_PROCESS	GOBP_HYALURONAN_METABOLIC_PROCESS	4/201	29/17872	0.000295851009522263	0.00501433841707335	0.00360081820800122	IL1B/NFKB1/CD44/TNFAIP6	4
GOBP_REGULATION_OF_T_CELL_DIFFERENTIATION	GOBP_REGULATION_OF_T_CELL_DIFFERENTIATION	GOBP_REGULATION_OF_T_CELL_DIFFERENTIATION	8/201	151/17872	0.000313468799324442	0.00528292332420797	0.00379369019699816	NLRP3/ZBTB16/NFKBIZ/RHOH/BCL6/PTPN2/IRF1/IL2RA	8
GOBP_MUSCLE_CELL_PROLIFERATION	GOBP_MUSCLE_CELL_PROLIFERATION	GOBP_MUSCLE_CELL_PROLIFERATION	10/201	233/17872	0.000315906136419525	0.00529408991539013	0.00380170897465247	TNFAIP3/SOD2/CFLAR/THBS1/EREG/PTEN/TNF/PTGS2/TLR4/SAV1	10
GOBP_REGULATION_OF_RESPONSE_TO_ENDOPLASMIC_RETICULUM_STRESS	GOBP_REGULATION_OF_RESPONSE_TO_ENDOPLASMIC_RETICULUM_STRESS	GOBP_REGULATION_OF_RESPONSE_TO_ENDOPLASMIC_RETICULUM_STRESS	6/201	82/17872	0.000323344542529022	0.00538847357745293	0.00386948629254079	PMAIP1/PTPN1/PPP1R15A/PTPN2/ATF6/NFE2L2	6
GOBP_POSITIVE_REGULATION_OF_PROTEIN_CATABOLIC_PROCESS	GOBP_POSITIVE_REGULATION_OF_PROTEIN_CATABOLIC_PROCESS	GOBP_POSITIVE_REGULATION_OF_PROTEIN_CATABOLIC_PROCESS	10/201	234/17872	0.000326834762552054	0.00540147049621184	0.00387881943638199	IL1B/TNFAIP3/RNF144B/RNF19B/PTEN/LDLR/TNF/PLK3/NFE2L2/SNX9	10
GOBP_NEUROMUSCULAR_PROCESS	GOBP_NEUROMUSCULAR_PROCESS	GOBP_NEUROMUSCULAR_PROCESS	8/201	152/17872	0.00032774594697095	0.00540147049621184	0.00387881943638199	GCH1/PTEN/SLC1A3/RBFOX2/HIPK2/TNF/CSMD1/KCNJ2	8
GOBP_REGULATION_OF_ENDOPLASMIC_RETICULUM_UNFOLDED_PROTEIN_RESPONSE	GOBP_REGULATION_OF_ENDOPLASMIC_RETICULUM_UNFOLDED_PROTEIN_RESPONSE	GOBP_REGULATION_OF_ENDOPLASMIC_RETICULUM_UNFOLDED_PROTEIN_RESPONSE	4/201	30/17872	0.000338380743176345	0.00554609756535734	0.00398267676323807	PTPN1/PPP1R15A/PTPN2/ATF6	4
GOBP_ENTRY_INTO_HOST	GOBP_ENTRY_INTO_HOST	GOBP_ENTRY_INTO_HOST	8/201	154/17872	0.000357893486223712	0.00583385939565756	0.00418931978409695	SLAMF1/INSR/LDLR/CD55/CH25H/ICAM1/CXCL8/CTSB	8
GOBP_REGULATION_OF_LEUKOCYTE_MEDIATED_IMMUNITY	GOBP_REGULATION_OF_LEUKOCYTE_MEDIATED_IMMUNITY	GOBP_REGULATION_OF_LEUKOCYTE_MEDIATED_IMMUNITY	10/201	237/17872	0.000361533347101119	0.00586116290436217	0.00420892655234999	NLRP3/IL1B/SERPINB9/SLAMF1/BCL6/ADGRE2/CD55/ICAM1/TNF/TLR4	10
GOBP_POSITIVE_REGULATION_OF_ENDOPLASMIC_RETICULUM_UNFOLDED_PROTEIN_RESPONSE	GOBP_POSITIVE_REGULATION_OF_ENDOPLASMIC_RETICULUM_UNFOLDED_PROTEIN_RESPONSE	GOBP_POSITIVE_REGULATION_OF_ENDOPLASMIC_RETICULUM_UNFOLDED_PROTEIN_RESPONSE	3/201	13/17872	0.000368842126926818	0.00588372227070961	0.00422512653135983	PTPN1/PTPN2/ATF6	3
GOBP_REGULATION_OF_NUCLEOTIDE_BINDING_OLIGOMERIZATION_DOMAIN_CONTAINING_SIGNALING_PATHWAY	GOBP_REGULATION_OF_NUCLEOTIDE_BINDING_OLIGOMERIZATION_DOMAIN_CONTAINING_SIGNALING_PATHWAY	GOBP_REGULATION_OF_NUCLEOTIDE_BINDING_OLIGOMERIZATION_DOMAIN_CONTAINING_SIGNALING_PATHWAY	3/201	13/17872	0.000368842126926818	0.00588372227070961	0.00422512653135983	TNFAIP3/BIRC3/TLR4	3
GOBP_REGULATION_OF_TRANSCRIPTION_FROM_RNA_POLYMERASE_II_PROMOTER_IN_RESPONSE_TO_HYPOXIA	GOBP_REGULATION_OF_TRANSCRIPTION_FROM_RNA_POLYMERASE_II_PROMOTER_IN_RESPONSE_TO_HYPOXIA	GOBP_REGULATION_OF_TRANSCRIPTION_FROM_RNA_POLYMERASE_II_PROMOTER_IN_RESPONSE_TO_HYPOXIA	3/201	13/17872	0.000368842126926818	0.00588372227070961	0.00422512653135983	NFE2L2/BACH1/EGR1	3
GOBP_HOMEOSTASIS_OF_NUMBER_OF_CELLS	GOBP_HOMEOSTASIS_OF_NUMBER_OF_CELLS	GOBP_HOMEOSTASIS_OF_NUMBER_OF_CELLS	11/201	283/17872	0.000372802461726065	0.00591526459217474	0.00424777720947671	TNFAIP3/PMAIP1/ZFP36/PDE4B/BCL6/RBFOX2/GPR183/HIPK2/PTPN2/STAT3/IL2RA	11
GOBP_REGULATION_OF_LIPID_STORAGE	GOBP_REGULATION_OF_LIPID_STORAGE	GOBP_REGULATION_OF_LIPID_STORAGE	5/201	55/17872	0.000377306532157125	0.00595505494933707	0.00427635083787107	NFKBIA/NFKB1/EHD1/TNF/PTPN2	5
GOBP_POSITIVE_REGULATION_OF_LIPID_BIOSYNTHETIC_PROCESS	GOBP_POSITIVE_REGULATION_OF_LIPID_BIOSYNTHETIC_PROCESS	GOBP_POSITIVE_REGULATION_OF_LIPID_BIOSYNTHETIC_PROCESS	6/201	85/17872	0.000392769632629593	0.00616648323228461	0.00442817840665497	IL1B/IL1A/LDLR/TNF/ADM/PTGS2	6
GOBP_RESPONSE_TO_DSRNA	GOBP_RESPONSE_TO_DSRNA	GOBP_RESPONSE_TO_DSRNA	5/201	56/17872	0.000410553479486016	0.00641194256181562	0.00460444381787843	PELI1/NFKBIA/IRAK3/NFKB1/PMAIP1	5
GOBP_LIPID_STORAGE	GOBP_LIPID_STORAGE	GOBP_LIPID_STORAGE	6/201	86/17872	0.000418328390447041	0.00649091361897473	0.00466115327720718	IL1B/NFKBIA/NFKB1/EHD1/TNF/PTPN2	6
GOBP_REGULATION_OF_ANATOMICAL_STRUCTURE_SIZE	GOBP_REGULATION_OF_ANATOMICAL_STRUCTURE_SIZE	GOBP_REGULATION_OF_ANATOMICAL_STRUCTURE_SIZE	15/201	487/17872	0.000419961893550829	0.00649091361897473	0.00466115327720718	SOD2/GCH1/HCK/TBXAS1/PPP1R15A/FMN1/PTEN/TNF/PRKCE/ADM/PTGS2/SNX9/KCNMA1/PLEK/ECE1	15
GOBP_ALPHA_BETA_T_CELL_ACTIVATION	GOBP_ALPHA_BETA_T_CELL_ACTIVATION	GOBP_ALPHA_BETA_T_CELL_ACTIVATION	8/201	158/17872	0.000424977563995873	0.00653457769793655	0.0046925086420597	NLRP3/ZBTB16/NFKBIZ/BCL6/GPR183/CD55/STAT3/IRF1	8
GOBP_NEGATIVE_REGULATION_OF_CELL_CELL_ADHESION	GOBP_NEGATIVE_REGULATION_OF_CELL_CELL_ADHESION	GOBP_NEGATIVE_REGULATION_OF_CELL_CELL_ADHESION	9/201	199/17872	0.000430304530682359	0.00658255597448962	0.00472696205095061	PELI1/SCGB1A1/IL1RN/BCL6/PTPN2/PAG1/SDC4/IRF1/IL2RA	9
GOBP_RESPONSE_TO_OXIDATIVE_STRESS	GOBP_RESPONSE_TO_OXIDATIVE_STRESS	GOBP_RESPONSE_TO_OXIDATIVE_STRESS	14/201	436/17872	0.000433035556957829	0.00659053605308777	0.0047326925800708	TNFAIP3/SOD2/GCH1/IL1A/AREG/SCGB1A1/MCTP1/TNF/PLK3/NFE2L2/PTGS2/MT-ND3/TLR4/KDM6B	14
GOBP_NEGATIVE_REGULATION_OF_CELL_JUNCTION_ASSEMBLY	GOBP_NEGATIVE_REGULATION_OF_CELL_JUNCTION_ASSEMBLY	GOBP_NEGATIVE_REGULATION_OF_CELL_JUNCTION_ASSEMBLY	4/201	32/17872	0.000436283578451077	0.00660626352548001	0.00474398654634219	IL1B/THBS1/PTEN/TNF	4
GOBP_EPITHELIAL_CELL_APOPTOTIC_PROCESS	GOBP_EPITHELIAL_CELL_APOPTOTIC_PROCESS	GOBP_EPITHELIAL_CELL_APOPTOTIC_PROCESS	7/201	121/17872	0.000439017084073008	0.00661408061509991	0.0047496000323688	TNFAIP3/CFLAR/ZFP36/THBS1/ICAM1/TNF/NFE2L2	7
GOBP_REGULATION_OF_MONOOXYGENASE_ACTIVITY	GOBP_REGULATION_OF_MONOOXYGENASE_ACTIVITY	GOBP_REGULATION_OF_MONOOXYGENASE_ACTIVITY	5/201	57/17872	0.000445963987616524	0.00668497776412106	0.00480051158317708	IL1B/NFKB1/GCH1/IL1A/TNF	5
GOBP_REGULATION_OF_CELL_JUNCTION_ASSEMBLY	GOBP_REGULATION_OF_CELL_JUNCTION_ASSEMBLY	GOBP_REGULATION_OF_CELL_JUNCTION_ASSEMBLY	9/201	201/17872	0.000462732512121678	0.00678819776391765	0.0048746343135919	IL1B/THBS1/FMN1/PTEN/RAPGEF2/TNF/IL1RAPL1/SDC4/PRKCH	9
GOBP_CELLULAR_POTASSIUM_ION_HOMEOSTASIS	GOBP_CELLULAR_POTASSIUM_ION_HOMEOSTASIS	GOBP_CELLULAR_POTASSIUM_ION_HOMEOSTASIS	3/201	14/17872	0.000465554456335941	0.00678819776391765	0.0048746343135919	ATP1A1/KCNJ2/KCNMA1	3
GOBP_MYD88_INDEPENDENT_TOLL_LIKE_RECEPTOR_SIGNALING_PATHWAY	GOBP_MYD88_INDEPENDENT_TOLL_LIKE_RECEPTOR_SIGNALING_PATHWAY	GOBP_MYD88_INDEPENDENT_TOLL_LIKE_RECEPTOR_SIGNALING_PATHWAY	3/201	14/17872	0.000465554456335941	0.00678819776391765	0.0048746343135919	TNIP3/PRKCE/TLR4	3
GOBP_PLATELET_DERIVED_GROWTH_FACTOR_RECEPTOR_BETA_SIGNALING_PATHWAY	GOBP_PLATELET_DERIVED_GROWTH_FACTOR_RECEPTOR_BETA_SIGNALING_PATHWAY	GOBP_PLATELET_DERIVED_GROWTH_FACTOR_RECEPTOR_BETA_SIGNALING_PATHWAY	3/201	14/17872	0.000465554456335941	0.00678819776391765	0.0048746343135919	PTPN1/PTPN2/PTPN12	3
GOBP_POSITIVE_REGULATION_OF_EXTRINSIC_APOPTOTIC_SIGNALING_PATHWAY_VIA_DEATH_DOMAIN_RECEPTORS	GOBP_POSITIVE_REGULATION_OF_EXTRINSIC_APOPTOTIC_SIGNALING_PATHWAY_VIA_DEATH_DOMAIN_RECEPTORS	GOBP_POSITIVE_REGULATION_OF_EXTRINSIC_APOPTOTIC_SIGNALING_PATHWAY_VIA_DEATH_DOMAIN_RECEPTORS	3/201	14/17872	0.000465554456335941	0.00678819776391765	0.0048746343135919	PMAIP1/THBS1/PTEN	3
GOBP_CELL_ACTIVATION_INVOLVED_IN_IMMUNE_RESPONSE	GOBP_CELL_ACTIVATION_INVOLVED_IN_IMMUNE_RESPONSE	GOBP_CELL_ACTIVATION_INVOLVED_IN_IMMUNE_RESPONSE	11/201	291/17872	0.000471307680249404	0.00678819776391765	0.0048746343135919	NLRP3/NFKBIZ/SLAMF1/BCL6/ADGRE2/GPR183/ICAM1/CCL3/PRKCE/STAT3/TLR4	11
GOBP_GLIOGENESIS	GOBP_GLIOGENESIS	GOBP_GLIOGENESIS	11/201	291/17872	0.000471307680249404	0.00678819776391765	0.0048746343135919	IL1B/FPR2/AREG/PTEN/LDLR/GPR183/TNF/CCL3/STAT3/TLR4/PRKCH	11
GOBP_REGULATION_OF_LIPID_METABOLIC_PROCESS	GOBP_REGULATION_OF_LIPID_METABOLIC_PROCESS	GOBP_REGULATION_OF_LIPID_METABOLIC_PROCESS	12/201	339/17872	0.00047301836058604	0.00678819776391765	0.0048746343135919	IL1B/NFKB1/FPR2/IL1A/ATP1A1/LDLR/TNF/PRKCE/ADM/PTGS2/FLT1/EGR1	12
GOBP_MUCOPOLYSACCHARIDE_METABOLIC_PROCESS	GOBP_MUCOPOLYSACCHARIDE_METABOLIC_PROCESS	GOBP_MUCOPOLYSACCHARIDE_METABOLIC_PROCESS	6/201	88/17872	0.000473330584946319	0.00678819776391765	0.0048746343135919	IL1B/NFKB1/CD44/TNFAIP6/CHST11/CSGALNACT2	6
GOBP_REGULATION_OF_FATTY_ACID_TRANSPORT	GOBP_REGULATION_OF_FATTY_ACID_TRANSPORT	GOBP_REGULATION_OF_FATTY_ACID_TRANSPORT	4/201	33/17872	0.000492122801136355	0.00702393452530979	0.00504391790638369	IL1B/ACSL1/IL1A/THBS1	4
GOBP_REGULATION_OF_STRESS_ACTIVATED_PROTEIN_KINASE_SIGNALING_CASCADE	GOBP_REGULATION_OF_STRESS_ACTIVATED_PROTEIN_KINASE_SIGNALING_CASCADE	GOBP_REGULATION_OF_STRESS_ACTIVATED_PROTEIN_KINASE_SIGNALING_CASCADE	9/201	203/17872	0.000497144316456818	0.00706181664757471	0.00507112122300564	IL1B/IL1A/SLAMF1/DUSP1/HIPK2/TNF/GADD45B/TRAF1/TLR4	9
GOBP_RESPONSE_TO_REACTIVE_OXYGEN_SPECIES	GOBP_RESPONSE_TO_REACTIVE_OXYGEN_SPECIES	GOBP_RESPONSE_TO_REACTIVE_OXYGEN_SPECIES	9/201	204/17872	0.000515122632593781	0.00728251570155094	0.00522960617275303	TNFAIP3/SOD2/GCH1/IL1A/AREG/SCGB1A1/PLK3/NFE2L2/KDM6B	9
GOBP_NEGATIVE_REGULATION_OF_EPITHELIAL_CELL_PROLIFERATION	GOBP_NEGATIVE_REGULATION_OF_EPITHELIAL_CELL_PROLIFERATION	GOBP_NEGATIVE_REGULATION_OF_EPITHELIAL_CELL_PROLIFERATION	8/201	163/17872	0.000522850042953432	0.0073333741434365	0.00526612784088547	THBS1/EREG/PTEN/KLF9/TNF/FLT1/SAV1/MTSS1	8
GOBP_CELLULAR_RESPONSE_TO_CORTICOSTEROID_STIMULUS	GOBP_CELLULAR_RESPONSE_TO_CORTICOSTEROID_STIMULUS	GOBP_CELLULAR_RESPONSE_TO_CORTICOSTEROID_STIMULUS	5/201	59/17872	0.000523636839608439	0.0073333741434365	0.00526612784088547	CFLAR/ZFP36/KLF9/MT-ND3/EIF4E	5
GOBP_REGULATION_OF_PROTEIN_CATABOLIC_PROCESS	GOBP_REGULATION_OF_PROTEIN_CATABOLIC_PROCESS	GOBP_REGULATION_OF_PROTEIN_CATABOLIC_PROCESS	13/201	395/17872	0.000550645818836868	0.00767559101677746	0.005511875264796	IL1B/TNFAIP3/RNF144B/IRAK3/RNF19B/PTEN/N4BP1/LDLR/HIPK2/TNF/PLK3/NFE2L2/SNX9	13
GOBP_NEGATIVE_REGULATION_OF_VIRAL_PROCESS	GOBP_NEGATIVE_REGULATION_OF_VIRAL_PROCESS	GOBP_NEGATIVE_REGULATION_OF_VIRAL_PROCESS	6/201	91/17872	0.00056621847437542	0.00785595213517152	0.00564139336770614	ZFP36/N4BP1/CH25H/ISG20/TNF/TNIP1	6
GOBP_POSITIVE_REGULATION_OF_HETEROTYPIC_CELL_CELL_ADHESION	GOBP_POSITIVE_REGULATION_OF_HETEROTYPIC_CELL_CELL_ADHESION	GOBP_POSITIVE_REGULATION_OF_HETEROTYPIC_CELL_CELL_ADHESION	3/201	15/17872	0.000577134496668528	0.00793360462471068	0.00569715595789694	IL1B/CD44/TNF	3
GOBP_REGULATION_OF_HEPATOCYTE_PROLIFERATION	GOBP_REGULATION_OF_HEPATOCYTE_PROLIFERATION	GOBP_REGULATION_OF_HEPATOCYTE_PROLIFERATION	3/201	15/17872	0.000577134496668528	0.00793360462471068	0.00569715595789694	TNFAIP3/CFLAR/TNF	3
GOBP_EPITHELIAL_CELL_PROLIFERATION	GOBP_EPITHELIAL_CELL_PROLIFERATION	GOBP_EPITHELIAL_CELL_PROLIFERATION	14/201	451/17872	0.000604605770777555	0.00827311474417178	0.00594095965008366	TNFAIP3/ALDH1A2/CFLAR/ZFP36/AREG/THBS1/EREG/PTEN/KLF9/TNF/STAT3/FLT1/SAV1/MTSS1	14
GOBP_RELAXATION_OF_MUSCLE	GOBP_RELAXATION_OF_MUSCLE	GOBP_RELAXATION_OF_MUSCLE	4/201	35/17872	0.000618755227181032	0.00842806777479916	0.00605223209475318	PDE4B/ATP1A1/KCNJ2/KCNMA1	4
GOBP_POSITIVE_REGULATION_OF_INTERLEUKIN_8_PRODUCTION	GOBP_POSITIVE_REGULATION_OF_INTERLEUKIN_8_PRODUCTION	GOBP_POSITIVE_REGULATION_OF_INTERLEUKIN_8_PRODUCTION	5/201	62/17872	0.000658665378215213	0.00893090374189081	0.00641332078788496	IL1B/TNF/STAT3/CD58/TLR4	5
GOBP_REGULATION_OF_PRODUCTION_OF_MOLECULAR_MEDIATOR_OF_IMMUNE_RESPONSE	GOBP_REGULATION_OF_PRODUCTION_OF_MOLECULAR_MEDIATOR_OF_IMMUNE_RESPONSE	GOBP_REGULATION_OF_PRODUCTION_OF_MOLECULAR_MEDIATOR_OF_IMMUNE_RESPONSE	8/201	169/17872	0.000663609046686578	0.00895722075233513	0.00643221914745028	NLRP3/IL1B/IRAK3/SLAMF1/BCL6/CD55/TNF/TLR4	8
GOBP_POSITIVE_REGULATION_OF_LEUKOCYTE_CHEMOTAXIS	GOBP_POSITIVE_REGULATION_OF_LEUKOCYTE_CHEMOTAXIS	GOBP_POSITIVE_REGULATION_OF_LEUKOCYTE_CHEMOTAXIS	6/201	94/17872	0.000672683720374915	0.00903880872918185	0.00649080782817901	CCL4/FPR2/THBS1/SLAMF1/CCL3/CXCL8	6
GOBP_REGULATION_OF_HORMONE_METABOLIC_PROCESS	GOBP_REGULATION_OF_HORMONE_METABOLIC_PROCESS	GOBP_REGULATION_OF_HORMONE_METABOLIC_PROCESS	4/201	36/17872	0.000690023865239745	0.0091471859188075	0.00656863395902157	NFKB1/ATP1A1/ADM/EGR1	4
GOBP_L_GLUTAMATE_IMPORT_ACROSS_PLASMA_MEMBRANE	GOBP_L_GLUTAMATE_IMPORT_ACROSS_PLASMA_MEMBRANE	GOBP_L_GLUTAMATE_IMPORT_ACROSS_PLASMA_MEMBRANE	3/201	16/17872	0.000704453147762033	0.0091471859188075	0.00656863395902157	SLC1A3/TNF/SLC1A2	3
GOBP_NUCLEOTIDE_BINDING_OLIGOMERIZATION_DOMAIN_CONTAINING_2_SIGNALING_PATHWAY	GOBP_NUCLEOTIDE_BINDING_OLIGOMERIZATION_DOMAIN_CONTAINING_2_SIGNALING_PATHWAY	GOBP_NUCLEOTIDE_BINDING_OLIGOMERIZATION_DOMAIN_CONTAINING_2_SIGNALING_PATHWAY	3/201	16/17872	0.000704453147762033	0.0091471859188075	0.00656863395902157	TNFAIP3/NFKBIA/TLR4	3
GOBP_POSITIVE_REGULATION_OF_MEMBRANE_PROTEIN_ECTODOMAIN_PROTEOLYSIS	GOBP_POSITIVE_REGULATION_OF_MEMBRANE_PROTEIN_ECTODOMAIN_PROTEOLYSIS	GOBP_POSITIVE_REGULATION_OF_MEMBRANE_PROTEIN_ECTODOMAIN_PROTEOLYSIS	3/201	16/17872	0.000704453147762033	0.0091471859188075	0.00656863395902157	IL1B/TNF/SNX9	3
GOBP_REGULATION_OF_VASCULOGENESIS	GOBP_REGULATION_OF_VASCULOGENESIS	GOBP_REGULATION_OF_VASCULOGENESIS	3/201	16/17872	0.000704453147762033	0.0091471859188075	0.00656863395902157	RIN2/RAPGEF2/ADM	3
GOBP_INTERLEUKIN_2_PRODUCTION	GOBP_INTERLEUKIN_2_PRODUCTION	GOBP_INTERLEUKIN_2_PRODUCTION	5/201	63/17872	0.000708992848834535	0.0091471859188075	0.00656863395902157	IL1B/TNFAIP3/IL1A/ZFP36/PDE4B	5
GOBP_LYMPHOCYTE_CHEMOTAXIS	GOBP_LYMPHOCYTE_CHEMOTAXIS	GOBP_LYMPHOCYTE_CHEMOTAXIS	5/201	63/17872	0.000708992848834535	0.0091471859188075	0.00656863395902157	CCL4/GPR183/CCL20/CH25H/CCL3	5
GOBP_NEGATIVE_REGULATION_OF_LIPID_LOCALIZATION	GOBP_NEGATIVE_REGULATION_OF_LIPID_LOCALIZATION	GOBP_NEGATIVE_REGULATION_OF_LIPID_LOCALIZATION	5/201	63/17872	0.000708992848834535	0.0091471859188075	0.00656863395902157	NFKBIA/NFKB1/THBS1/TNF/PTPN2	5
GOBP_REGULATION_OF_IMMUNE_EFFECTOR_PROCESS	GOBP_REGULATION_OF_IMMUNE_EFFECTOR_PROCESS	GOBP_REGULATION_OF_IMMUNE_EFFECTOR_PROCESS	12/201	355/17872	0.000710318809596156	0.0091471859188075	0.00656863395902157	NLRP3/IL1B/IRAK3/NFKBIZ/SERPINB9/SLAMF1/BCL6/ADGRE2/CD55/ICAM1/TNF/TLR4	12
GOBP_NEGATIVE_REGULATION_OF_NF_KAPPAB_TRANSCRIPTION_FACTOR_ACTIVITY	GOBP_NEGATIVE_REGULATION_OF_NF_KAPPAB_TRANSCRIPTION_FACTOR_ACTIVITY	GOBP_NEGATIVE_REGULATION_OF_NF_KAPPAB_TRANSCRIPTION_FACTOR_ACTIVITY	6/201	95/17872	0.000711413722146611	0.0091471859188075	0.00656863395902157	NLRP3/TNFAIP3/PELI1/NFKBIA/IRAK3/IRAK2	6
GOBP_REGULATION_OF_BLOOD_CIRCULATION	GOBP_REGULATION_OF_BLOOD_CIRCULATION	GOBP_REGULATION_OF_BLOOD_CIRCULATION	10/201	261/17872	0.000765976938710246	0.0098064772882947	0.00704207395651842	GCH1/TBXAS1/PDE4B/ATP1A1/TNF/ADM/PTGS2/KCNJ2/ECE1/PKP2	10
GOBP_SMOOTH_MUSCLE_CELL_PROLIFERATION	GOBP_SMOOTH_MUSCLE_CELL_PROLIFERATION	GOBP_SMOOTH_MUSCLE_CELL_PROLIFERATION	8/201	173/17872	0.000773365692981159	0.00985876009471281	0.00707961846701151	TNFAIP3/SOD2/THBS1/EREG/PTEN/TNF/PTGS2/TLR4	8
GOBP_RESPONSE_TO_XENOBIOTIC_STIMULUS	GOBP_RESPONSE_TO_XENOBIOTIC_STIMULUS	GOBP_RESPONSE_TO_XENOBIOTIC_STIMULUS	13/201	411/17872	0.000795438773473835	0.0100969951543509	0.00725069609863048	IL1B/SOD2/ACSL1/THBS1/SCGB1A1/PDE4B/SLC1A3/ATP1A1/TNF/NFE2L2/PTGS2/DUSP6/SLC1A2	13
GOBP_CHRONIC_INFLAMMATORY_RESPONSE	GOBP_CHRONIC_INFLAMMATORY_RESPONSE	GOBP_CHRONIC_INFLAMMATORY_RESPONSE	3/201	17/17872	0.00084834669237347	0.0105605869157911	0.00758360335714132	TNFAIP3/THBS1/TNF	3
GOBP_POSITIVE_REGULATION_OF_GLIAL_CELL_PROLIFERATION	GOBP_POSITIVE_REGULATION_OF_GLIAL_CELL_PROLIFERATION	GOBP_POSITIVE_REGULATION_OF_GLIAL_CELL_PROLIFERATION	3/201	17/17872	0.00084834669237347	0.0105605869157911	0.00758360335714132	IL1B/TNF/PRKCH	3
GOBP_RELAXATION_OF_CARDIAC_MUSCLE	GOBP_RELAXATION_OF_CARDIAC_MUSCLE	GOBP_RELAXATION_OF_CARDIAC_MUSCLE	3/201	17/17872	0.00084834669237347	0.0105605869157911	0.00758360335714132	PDE4B/ATP1A1/KCNJ2	3
GOBP_NEGATIVE_REGULATION_OF_PRODUCTION_OF_MOLECULAR_MEDIATOR_OF_IMMUNE_RESPONSE	GOBP_NEGATIVE_REGULATION_OF_PRODUCTION_OF_MOLECULAR_MEDIATOR_OF_IMMUNE_RESPONSE	GOBP_NEGATIVE_REGULATION_OF_PRODUCTION_OF_MOLECULAR_MEDIATOR_OF_IMMUNE_RESPONSE	4/201	38/17872	0.00084966170291313	0.0105605869157911	0.00758360335714132	IRAK3/SLAMF1/BCL6/TNF	4
GOBP_T_CELL_CYTOKINE_PRODUCTION	GOBP_T_CELL_CYTOKINE_PRODUCTION	GOBP_T_CELL_CYTOKINE_PRODUCTION	4/201	38/17872	0.00084966170291313	0.0105605869157911	0.00758360335714132	NLRP3/IL1B/SLAMF1/CD55	4
GOBP_ADAPTIVE_IMMUNE_RESPONSE_BASED_ON_SOMATIC_RECOMBINATION_OF_IMMUNE_RECEPTORS_BUILT_FROM_IMMUNOGLOBULIN_SUPERFAMILY_DOMAINS	GOBP_ADAPTIVE_IMMUNE_RESPONSE_BASED_ON_SOMATIC_RECOMBINATION_OF_IMMUNE_RECEPTORS_BUILT_FROM_IMMUNOGLOBULIN_SUPERFAMILY_DOMAINS	GOBP_ADAPTIVE_IMMUNE_RESPONSE_BASED_ON_SOMATIC_RECOMBINATION_OF_IMMUNE_RECEPTORS_BUILT_FROM_IMMUNOGLOBULIN_SUPERFAMILY_DOMAINS	12/201	363/17872	0.000862177614099911	0.0106716839122823	0.00766338259311342	NLRP3/IL1B/TNFAIP3/NFKBIZ/SLAMF1/BCL6/CD55/ICAM1/TNF/HLA-DQA2/STAT3/TLR4	12
GOBP_REGULATION_OF_RESPONSE_TO_CYTOKINE_STIMULUS	GOBP_REGULATION_OF_RESPONSE_TO_CYTOKINE_STIMULUS	GOBP_REGULATION_OF_RESPONSE_TO_CYTOKINE_STIMULUS	8/201	178/17872	0.000930622640042218	0.0114712699803551	0.00823756882334021	TNFAIP3/IRAK3/IL1R2/PTPN1/IL1RN/IRAK2/PTPN2/TLR4	8
GOBP_ENDOTHELIAL_CELL_APOPTOTIC_PROCESS	GOBP_ENDOTHELIAL_CELL_APOPTOTIC_PROCESS	GOBP_ENDOTHELIAL_CELL_APOPTOTIC_PROCESS	5/201	67/17872	0.000939500394467793	0.0115330439370264	0.00828192897007563	TNFAIP3/THBS1/ICAM1/TNF/NFE2L2	5
GOBP_POSITIVE_REGULATION_OF_NEUROINFLAMMATORY_RESPONSE	GOBP_POSITIVE_REGULATION_OF_NEUROINFLAMMATORY_RESPONSE	GOBP_POSITIVE_REGULATION_OF_NEUROINFLAMMATORY_RESPONSE	3/201	18/17872	0.00100961760208119	0.0123429889631484	0.00886355401309417	IL1B/TNF/CCL3	3
GOBP_CD4_POSITIVE_ALPHA_BETA_T_CELL_ACTIVATION	GOBP_CD4_POSITIVE_ALPHA_BETA_T_CELL_ACTIVATION	GOBP_CD4_POSITIVE_ALPHA_BETA_T_CELL_ACTIVATION	6/201	102/17872	0.00103308502763319	0.012519531345919	0.00899032986535817	NLRP3/NFKBIZ/BCL6/GPR183/CD55/STAT3	6
GOBP_REGULATION_OF_RESPONSE_TO_OXIDATIVE_STRESS	GOBP_REGULATION_OF_RESPONSE_TO_OXIDATIVE_STRESS	GOBP_REGULATION_OF_RESPONSE_TO_OXIDATIVE_STRESS	6/201	102/17872	0.00103308502763319	0.012519531345919	0.00899032986535817	SOD2/GCH1/MCTP1/TNF/NFE2L2/TLR4	6
GOBP_REGULATION_OF_LYMPHOCYTE_DIFFERENTIATION	GOBP_REGULATION_OF_LYMPHOCYTE_DIFFERENTIATION	GOBP_REGULATION_OF_LYMPHOCYTE_DIFFERENTIATION	8/201	181/17872	0.00103664909233725	0.012519531345919	0.00899032986535817	NLRP3/ZBTB16/NFKBIZ/RHOH/BCL6/PTPN2/IRF1/IL2RA	8
GOBP_ENDOTHELIAL_CELL_DEVELOPMENT	GOBP_ENDOTHELIAL_CELL_DEVELOPMENT	GOBP_ENDOTHELIAL_CELL_DEVELOPMENT	5/201	69/17872	0.00107367881101478	0.0128111355730283	0.00919973212806348	IL1B/CLIC4/RAPGEF2/ICAM1/TNF	5
GOBP_NEGATIVE_REGULATION_OF_INTERLEUKIN_6_PRODUCTION	GOBP_NEGATIVE_REGULATION_OF_INTERLEUKIN_6_PRODUCTION	GOBP_NEGATIVE_REGULATION_OF_INTERLEUKIN_6_PRODUCTION	5/201	69/17872	0.00107367881101478	0.0128111355730283	0.00919973212806348	TNFAIP3/IRAK3/SLAMF1/TNF/TLR4	5
GOBP_POSITIVE_REGULATION_OF_CYTOKINE_PRODUCTION_INVOLVED_IN_IMMUNE_RESPONSE	GOBP_POSITIVE_REGULATION_OF_CYTOKINE_PRODUCTION_INVOLVED_IN_IMMUNE_RESPONSE	GOBP_POSITIVE_REGULATION_OF_CYTOKINE_PRODUCTION_INVOLVED_IN_IMMUNE_RESPONSE	5/201	69/17872	0.00107367881101478	0.0128111355730283	0.00919973212806348	NLRP3/IL1B/SLAMF1/CD55/TLR4	5
GOBP_RESPONSE_TO_EXTRACELLULAR_STIMULUS	GOBP_RESPONSE_TO_EXTRACELLULAR_STIMULUS	GOBP_RESPONSE_TO_EXTRACELLULAR_STIMULUS	14/201	479/17872	0.00108123612091034	0.0128499097556795	0.00922757603712536	SOD2/ALDH1A2/ACSL1/PMAIP1/IL1A/ZFP36/ENSA/LDLR/TNF/ADM/KYNU/NFE2L2/PTGS2/SLC1A2	14
GOBP_PEPTIDYL_TYROSINE_DEPHOSPHORYLATION	GOBP_PEPTIDYL_TYROSINE_DEPHOSPHORYLATION	GOBP_PEPTIDYL_TYROSINE_DEPHOSPHORYLATION	6/201	103/17872	0.0010868895324826	0.0128658391880777	0.00923901503175473	PTPN1/PTEN/DUSP1/PTPN2/DUSP6/PTPN12	6
GOBP_RESPONSE_TO_CARBOHYDRATE	GOBP_RESPONSE_TO_CARBOHYDRATE	GOBP_RESPONSE_TO_CARBOHYDRATE	9/201	227/17872	0.00110078205886475	0.0129523095150555	0.00930110974932967	IL1B/SOD2/IL1A/THBS1/ICAM1/PRKCE/PTGS2/KLF7/EGR1	9
GOBP_REGULATION_OF_MITOTIC_CELL_CYCLE	GOBP_REGULATION_OF_MITOTIC_CELL_CYCLE	GOBP_REGULATION_OF_MITOTIC_CELL_CYCLE	14/201	480/17872	0.00110287851720553	0.0129523095150555	0.00930110974932967	IL1B/GPR132/IL1A/EREG/PTEN/INSR/BCL6/DUSP1/TNF/PLK3/TEX14/BTG2/CCND3/EIF4E	14
GOBP_REGULATION_OF_ORGANIC_ACID_TRANSPORT	GOBP_REGULATION_OF_ORGANIC_ACID_TRANSPORT	GOBP_REGULATION_OF_ORGANIC_ACID_TRANSPORT	5/201	70/17872	0.00114585733009407	0.013404283983022	0.00962567457891197	IL1B/ACSL1/IL1A/THBS1/TNF	5
GOBP_CD4_POSITIVE_ALPHA_BETA_T_CELL_CYTOKINE_PRODUCTION	GOBP_CD4_POSITIVE_ALPHA_BETA_T_CELL_CYTOKINE_PRODUCTION	GOBP_CD4_POSITIVE_ALPHA_BETA_T_CELL_CYTOKINE_PRODUCTION	3/201	19/17872	0.00118903532805433	0.0138550483733831	0.00994937044650728	NLRP3/IL1B/SLAMF1	3
GOBP_REGULATION_OF_ALPHA_BETA_T_CELL_ACTIVATION	GOBP_REGULATION_OF_ALPHA_BETA_T_CELL_ACTIVATION	GOBP_REGULATION_OF_ALPHA_BETA_T_CELL_ACTIVATION	6/201	105/17872	0.0012009275169446	0.0139391703620457	0.0100097788121329	NLRP3/ZBTB16/NFKBIZ/BCL6/CD55/IRF1	6
GOBP_POSITIVE_REGULATION_OF_REACTIVE_OXYGEN_SPECIES_METABOLIC_PROCESS	GOBP_POSITIVE_REGULATION_OF_REACTIVE_OXYGEN_SPECIES_METABOLIC_PROCESS	GOBP_POSITIVE_REGULATION_OF_REACTIVE_OXYGEN_SPECIES_METABOLIC_PROCESS	5/201	71/17872	0.00122156745670879	0.014104582964041	0.0101285623204557	SOD2/FPR2/THBS1/NFE2L2/TLR4	5
GOBP_WOUND_HEALING	GOBP_WOUND_HEALING	GOBP_WOUND_HEALING	13/201	431/17872	0.00122463526238237	0.014104582964041	0.0101285623204557	TNFAIP3/CFLAR/IL1A/CD44/THBS1/EREG/PTEN/TNF/PRKCE/SDC4/NFE2L2/PLEK/TLR4	13
GOBP_REACTIVE_OXYGEN_SPECIES_METABOLIC_PROCESS	GOBP_REACTIVE_OXYGEN_SPECIES_METABOLIC_PROCESS	GOBP_REACTIVE_OXYGEN_SPECIES_METABOLIC_PROCESS	9/201	231/17872	0.00124327894423259	0.0141546756991183	0.0101645341312016	SOD2/CFLAR/GCH1/FPR2/PMAIP1/THBS1/TNF/NFE2L2/TLR4	9
GOBP_POSITIVE_REGULATION_OF_B_CELL_PROLIFERATION	GOBP_POSITIVE_REGULATION_OF_B_CELL_PROLIFERATION	GOBP_POSITIVE_REGULATION_OF_B_CELL_PROLIFERATION	4/201	42/17872	0.00124406524001682	0.0141546756991183	0.0101645341312016	PELI1/BCL6/GPR183/TLR4	4
GOBP_REGULATION_OF_NITRIC_OXIDE_SYNTHASE_ACTIVITY	GOBP_REGULATION_OF_NITRIC_OXIDE_SYNTHASE_ACTIVITY	GOBP_REGULATION_OF_NITRIC_OXIDE_SYNTHASE_ACTIVITY	4/201	42/17872	0.00124406524001682	0.0141546756991183	0.0101645341312016	IL1B/GCH1/IL1A/TNF	4
GOBP_ACTIVATION_OF_IMMUNE_RESPONSE	GOBP_ACTIVATION_OF_IMMUNE_RESPONSE	GOBP_ACTIVATION_OF_IMMUNE_RESPONSE	12/201	379/17872	0.00124796503817234	0.0141546756991183	0.0101645341312016	IL1B/NFKBIZ/FPR2/LCP2/HCK/PDE4B/CD55/PTPN2/PRKCE/FPR1/TLR4/PRKCH	12
GOBP_NEGATIVE_REGULATION_OF_HEMOPOIESIS	GOBP_NEGATIVE_REGULATION_OF_HEMOPOIESIS	GOBP_NEGATIVE_REGULATION_OF_HEMOPOIESIS	6/201	106/17872	0.00126127224330352	0.0141840357791836	0.010185617732286	BCL6/CCL3/PTPN2/TNFAIP6/IRF1/TLR4	6
GOBP_REGULATION_OF_OXIDOREDUCTASE_ACTIVITY	GOBP_REGULATION_OF_OXIDOREDUCTASE_ACTIVITY	GOBP_REGULATION_OF_OXIDOREDUCTASE_ACTIVITY	6/201	106/17872	0.00126127224330352	0.0141840357791836	0.010185617732286	IL1B/NFKB1/GCH1/IL1A/TNF/ABL2	6
GOBP_POSITIVE_REGULATION_OF_ORGANELLE_ORGANIZATION	GOBP_POSITIVE_REGULATION_OF_ORGANELLE_ORGANIZATION	GOBP_POSITIVE_REGULATION_OF_ORGANELLE_ORGANIZATION	14/201	487/17872	0.00126481847712466	0.0141840357791836	0.010185617732286	IL1B/OOEP/PMAIP1/IL1A/HCK/EREG/FMN1/INSR/TNF/PRKCE/SDC4/SNX9/PLEK/MTSS1	14
GOBP_POSITIVE_REGULATION_OF_LYMPHOCYTE_DIFFERENTIATION	GOBP_POSITIVE_REGULATION_OF_LYMPHOCYTE_DIFFERENTIATION	GOBP_POSITIVE_REGULATION_OF_LYMPHOCYTE_DIFFERENTIATION	6/201	107/17872	0.00132390919797518	0.0146267449539258	0.01050352911454	NLRP3/ZBTB16/NFKBIZ/RHOH/BCL6/IL2RA	6
GOBP_POSITIVE_REGULATION_OF_TUMOR_NECROSIS_FACTOR_SUPERFAMILY_CYTOKINE_PRODUCTION	GOBP_POSITIVE_REGULATION_OF_TUMOR_NECROSIS_FACTOR_SUPERFAMILY_CYTOKINE_PRODUCTION	GOBP_POSITIVE_REGULATION_OF_TUMOR_NECROSIS_FACTOR_SUPERFAMILY_CYTOKINE_PRODUCTION	6/201	107/17872	0.00132390919797518	0.0146267449539258	0.01050352911454	IL1A/THBS1/CCL3/STAT3/LILRA5/TLR4	6
GOBP_REGULATION_OF_PATTERN_RECOGNITION_RECEPTOR_SIGNALING_PATHWAY	GOBP_REGULATION_OF_PATTERN_RECOGNITION_RECEPTOR_SIGNALING_PATHWAY	GOBP_REGULATION_OF_PATTERN_RECOGNITION_RECEPTOR_SIGNALING_PATHWAY	6/201	107/17872	0.00132390919797518	0.0146267449539258	0.01050352911454	TNFAIP3/PELI1/IRAK3/BIRC3/IRF1/TLR4	6
GOBP_TUMOR_NECROSIS_FACTOR_MEDIATED_SIGNALING_PATHWAY	GOBP_TUMOR_NECROSIS_FACTOR_MEDIATED_SIGNALING_PATHWAY	GOBP_TUMOR_NECROSIS_FACTOR_MEDIATED_SIGNALING_PATHWAY	6/201	107/17872	0.00132390919797518	0.0146267449539258	0.01050352911454	TNFAIP3/NFKBIA/BIRC3/TNF/PTPN2/TRAF1	6
GOBP_NEGATIVE_REGULATION_OF_PHOSPHORYLATION	GOBP_NEGATIVE_REGULATION_OF_PHOSPHORYLATION	GOBP_NEGATIVE_REGULATION_OF_PHOSPHORYLATION	12/201	383/17872	0.00136406270210888	0.0150147566066081	0.0107821619685048	IL1B/TNFAIP3/SAMSN1/IRAK3/PTPN1/PTEN/DUSP1/GADD45B/PTPN2/STAT3/DUSP6/LDLRAD4	12
GOBP_TOLL_LIKE_RECEPTOR_3_SIGNALING_PATHWAY	GOBP_TOLL_LIKE_RECEPTOR_3_SIGNALING_PATHWAY	GOBP_TOLL_LIKE_RECEPTOR_3_SIGNALING_PATHWAY	3/201	20/17872	0.00138733707694169	0.0152148033107245	0.0109258163760694	TNFAIP3/PELI1/TNF	3
GOBP_GLIAL_CELL_PROLIFERATION	GOBP_GLIAL_CELL_PROLIFERATION	GOBP_GLIAL_CELL_PROLIFERATION	4/201	44/17872	0.00148267342942931	0.0162007869596617	0.0116338555191388	IL1B/AREG/TNF/PRKCH	4
GOBP_BIOLOGICAL_PROCESS_INVOLVED_IN_INTERACTION_WITH_HOST	GOBP_BIOLOGICAL_PROCESS_INVOLVED_IN_INTERACTION_WITH_HOST	GOBP_BIOLOGICAL_PROCESS_INVOLVED_IN_INTERACTION_WITH_HOST	8/201	192/17872	0.00151087985816036	0.0164487394777094	0.0118119112998707	SLAMF1/INSR/LDLR/CD55/CH25H/ICAM1/CXCL8/CTSB	8
GOBP_RESPONSE_TO_NUTRIENT	GOBP_RESPONSE_TO_NUTRIENT	GOBP_RESPONSE_TO_NUTRIENT	7/201	150/17872	0.00155716266209165	0.0167417277341192	0.0120223074400313	SOD2/ALDH1A2/ACSL1/IL1A/ENSA/KYNU/PTGS2	7
GOBP_CYTOKINE_PRODUCTION_INVOLVED_IN_INFLAMMATORY_RESPONSE	GOBP_CYTOKINE_PRODUCTION_INVOLVED_IN_INFLAMMATORY_RESPONSE	GOBP_CYTOKINE_PRODUCTION_INVOLVED_IN_INFLAMMATORY_RESPONSE	5/201	75/17872	0.00156183480178049	0.0167417277341192	0.0120223074400313	IL1R2/TNF/STAT3/TLR4/MEFV	5
GOBP_ENDOPLASMIC_RETICULUM_UNFOLDED_PROTEIN_RESPONSE	GOBP_ENDOPLASMIC_RETICULUM_UNFOLDED_PROTEIN_RESPONSE	GOBP_ENDOPLASMIC_RETICULUM_UNFOLDED_PROTEIN_RESPONSE	5/201	75/17872	0.00156183480178049	0.0167417277341192	0.0120223074400313	PTPN1/PPP1R15A/PTPN2/ATF6/NFE2L2	5
GOBP_REGULATION_OF_CALCIUM_MEDIATED_SIGNALING	GOBP_REGULATION_OF_CALCIUM_MEDIATED_SIGNALING	GOBP_REGULATION_OF_CALCIUM_MEDIATED_SIGNALING	5/201	75/17872	0.00156183480178049	0.0167417277341192	0.0120223074400313	CCL4/TNF/CCL3/NFAT5/PLEK	5
GOBP_BIOLOGICAL_PROCESS_INVOLVED_IN_SYMBIOTIC_INTERACTION	GOBP_BIOLOGICAL_PROCESS_INVOLVED_IN_SYMBIOTIC_INTERACTION	GOBP_BIOLOGICAL_PROCESS_INVOLVED_IN_SYMBIOTIC_INTERACTION	10/201	287/17872	0.00156585385109596	0.0167417277341192	0.0120223074400313	CCL4/SLAMF1/INSR/LDLR/CD55/CH25H/ICAM1/CCL3/CXCL8/CTSB	10
GOBP_CELLULAR_RESPONSE_TO_FLUID_SHEAR_STRESS	GOBP_CELLULAR_RESPONSE_TO_FLUID_SHEAR_STRESS	GOBP_CELLULAR_RESPONSE_TO_FLUID_SHEAR_STRESS	3/201	21/17872	0.00160522857212787	0.016995028467105	0.0122042037971518	NFE2L2/PTGS2/MTSS1	3
GOBP_REGULATION_OF_MYOBLAST_FUSION	GOBP_REGULATION_OF_MYOBLAST_FUSION	GOBP_REGULATION_OF_MYOBLAST_FUSION	3/201	21/17872	0.00160522857212787	0.016995028467105	0.0122042037971518	CFLAR/SCGB3A1/EHD1	3
GOBP_CELLULAR_CARBOHYDRATE_METABOLIC_PROCESS	GOBP_CELLULAR_CARBOHYDRATE_METABOLIC_PROCESS	GOBP_CELLULAR_CARBOHYDRATE_METABOLIC_PROCESS	10/201	288/17872	0.00160663695196902	0.016995028467105	0.0122042037971518	PFKFB3/PMAIP1/PTEN/INSR/PTPN2/PRKCE/CSGALNACT2/GK/STAT3/PLEK	10
GOBP_RESPONSE_TO_VIRUS	GOBP_RESPONSE_TO_VIRUS	GOBP_RESPONSE_TO_VIRUS	12/201	391/17872	0.00162317300700427	0.0171092759006846	0.0122862453756879	NLRP3/IL1B/TNFAIP3/IRAK3/CCL4/NFKB1/PMAIP1/BIRC3/IFNGR2/ISG20/TNF/IRF1	12
GOBP_T_CELL_DIFFERENTIATION_INVOLVED_IN_IMMUNE_RESPONSE	GOBP_T_CELL_DIFFERENTIATION_INVOLVED_IN_IMMUNE_RESPONSE	GOBP_T_CELL_DIFFERENTIATION_INVOLVED_IN_IMMUNE_RESPONSE	5/201	76/17872	0.00165679178211104	0.0174021474860466	0.012496557733862	NLRP3/NFKBIZ/BCL6/GPR183/STAT3	5
GOBP_NEGATIVE_REGULATION_OF_IMMUNE_EFFECTOR_PROCESS	GOBP_NEGATIVE_REGULATION_OF_IMMUNE_EFFECTOR_PROCESS	GOBP_NEGATIVE_REGULATION_OF_IMMUNE_EFFECTOR_PROCESS	6/201	112/17872	0.00167348873722009	0.01745460455639	0.0125342273840371	IRAK3/SERPINB9/SLAMF1/BCL6/CD55/TNF	6
GOBP_POSITIVE_REGULATION_OF_LIPID_LOCALIZATION	GOBP_POSITIVE_REGULATION_OF_LIPID_LOCALIZATION	GOBP_POSITIVE_REGULATION_OF_LIPID_LOCALIZATION	6/201	112/17872	0.00167348873722009	0.01745460455639	0.0125342273840371	IL1B/NFKBIA/NFKB1/ACSL1/IL1A/EHD1	6
GOBP_MONOVALENT_INORGANIC_CATION_HOMEOSTASIS	GOBP_MONOVALENT_INORGANIC_CATION_HOMEOSTASIS	GOBP_MONOVALENT_INORGANIC_CATION_HOMEOSTASIS	7/201	153/17872	0.00174400884765024	0.0179996907765799	0.0129256561675248	CLIC4/IL1A/SLC1A3/ATP1A1/TMEM165/KCNJ2/KCNMA1	7
GOBP_REGULATION_OF_NEUTROPHIL_MIGRATION	GOBP_REGULATION_OF_NEUTROPHIL_MIGRATION	GOBP_REGULATION_OF_NEUTROPHIL_MIGRATION	4/201	46/17872	0.00175143497679692	0.0179996907765799	0.0129256561675248	IL1A/RHOH/CXCL8/TNFAIP6	4
GOBP_POSITIVE_REGULATION_OF_CARBOHYDRATE_METABOLIC_PROCESS	GOBP_POSITIVE_REGULATION_OF_CARBOHYDRATE_METABOLIC_PROCESS	GOBP_POSITIVE_REGULATION_OF_CARBOHYDRATE_METABOLIC_PROCESS	5/201	77/17872	0.00175592021990773	0.0179996907765799	0.0129256561675248	NFKB1/PMAIP1/INSR/PTPN2/PRKCE	5
GOBP_POSITIVE_REGULATION_OF_INTERFERON_GAMMA_PRODUCTION	GOBP_POSITIVE_REGULATION_OF_INTERFERON_GAMMA_PRODUCTION	GOBP_POSITIVE_REGULATION_OF_INTERFERON_GAMMA_PRODUCTION	5/201	77/17872	0.00175592021990773	0.0179996907765799	0.0129256561675248	IL1B/SLAMF1/PDE4B/TNF/TLR4	5
GOBP_REGULATION_OF_TOLL_LIKE_RECEPTOR_SIGNALING_PATHWAY	GOBP_REGULATION_OF_TOLL_LIKE_RECEPTOR_SIGNALING_PATHWAY	GOBP_REGULATION_OF_TOLL_LIKE_RECEPTOR_SIGNALING_PATHWAY	5/201	77/17872	0.00175592021990773	0.0179996907765799	0.0129256561675248	TNFAIP3/PELI1/IRAK3/BIRC3/IRF1	5
GOBP_NEGATIVE_REGULATION_OF_LOCOMOTION	GOBP_NEGATIVE_REGULATION_OF_LOCOMOTION	GOBP_NEGATIVE_REGULATION_OF_LOCOMOTION	12/201	396/17872	0.00180481377467557	0.018437532499511	0.0132400722114808	CLIC4/THBS1/PTEN/MCTP1/SRGAP1/DUSP1/TNF/PTPN2/NFE2L2/TNFAIP6/STAT3/LDLRAD4	12
GOBP_ADENYLATE_CYCLASE_MODULATING_G_PROTEIN_COUPLED_RECEPTOR_SIGNALING_PATHWAY	GOBP_ADENYLATE_CYCLASE_MODULATING_G_PROTEIN_COUPLED_RECEPTOR_SIGNALING_PATHWAY	GOBP_ADENYLATE_CYCLASE_MODULATING_G_PROTEIN_COUPLED_RECEPTOR_SIGNALING_PATHWAY	9/201	244/17872	0.00181241400761885	0.0184519828830274	0.0132504490946806	FPR2/PDE4B/ADGRE2/RAPGEF2/ADM/AKAP13/GNG2/FPR1/ADGRE5	9
GOBP_LEUKOCYTE_MEDIATED_IMMUNITY	GOBP_LEUKOCYTE_MEDIATED_IMMUNITY	GOBP_LEUKOCYTE_MEDIATED_IMMUNITY	13/201	451/17872	0.00183212606694033	0.0185770839871363	0.0133402847411904	NLRP3/IL1B/SERPINB9/RNF19B/SLAMF1/BCL6/ADGRE2/CD55/ICAM1/TNF/CCL3/HLA-DQA2/TLR4	13
GOBP_CELLULAR_SODIUM_ION_HOMEOSTASIS	GOBP_CELLULAR_SODIUM_ION_HOMEOSTASIS	GOBP_CELLULAR_SODIUM_ION_HOMEOSTASIS	3/201	22/17872	0.00184338480060086	0.0185770839871363	0.0133402847411904	IL1A/SLC1A3/ATP1A1	3
GOBP_NEGATIVE_REGULATION_OF_LIPID_STORAGE	GOBP_NEGATIVE_REGULATION_OF_LIPID_STORAGE	GOBP_NEGATIVE_REGULATION_OF_LIPID_STORAGE	3/201	22/17872	0.00184338480060086	0.0185770839871363	0.0133402847411904	NFKBIA/TNF/PTPN2	3
GOBP_REGULATION_OF_GLUCOSE_TRANSMEMBRANE_TRANSPORT	GOBP_REGULATION_OF_GLUCOSE_TRANSMEMBRANE_TRANSPORT	GOBP_REGULATION_OF_GLUCOSE_TRANSMEMBRANE_TRANSPORT	5/201	78/17872	0.00185932869313004	0.0186746716889122	0.0134103628939204	IL1B/INSR/TNF/NFE2L2/SLC1A2	5
GOBP_CELLULAR_RESPONSE_TO_PEPTIDE_HORMONE_STIMULUS	GOBP_CELLULAR_RESPONSE_TO_PEPTIDE_HORMONE_STIMULUS	GOBP_CELLULAR_RESPONSE_TO_PEPTIDE_HORMONE_STIMULUS	10/201	294/17872	0.00186982909657162	0.0187171147485676	0.0134408414395028	IL1B/CFLAR/NFKB1/PTPN1/INSR/PTPN2/NFE2L2/NAMPT/STAT3/CCND3	10
GOBP_ADENYLATE_CYCLASE_ACTIVATING_G_PROTEIN_COUPLED_RECEPTOR_SIGNALING_PATHWAY	GOBP_ADENYLATE_CYCLASE_ACTIVATING_G_PROTEIN_COUPLED_RECEPTOR_SIGNALING_PATHWAY	GOBP_ADENYLATE_CYCLASE_ACTIVATING_G_PROTEIN_COUPLED_RECEPTOR_SIGNALING_PATHWAY	7/201	155/17872	0.00187794371849787	0.0187354719474219	0.0134540238237746	PDE4B/ADGRE2/RAPGEF2/ADM/AKAP13/GNG2/ADGRE5	7
GOBP_FIBROBLAST_MIGRATION	GOBP_FIBROBLAST_MIGRATION	GOBP_FIBROBLAST_MIGRATION	4/201	47/17872	0.00189771569348434	0.0188069299457269	0.0135053381228908	ZFAND5/THBS1/PRKCE/SDC4	4
GOBP_REGULATION_OF_ACUTE_INFLAMMATORY_RESPONSE	GOBP_REGULATION_OF_ACUTE_INFLAMMATORY_RESPONSE	GOBP_REGULATION_OF_ACUTE_INFLAMMATORY_RESPONSE	4/201	47/17872	0.00189771569348434	0.0188069299457269	0.0135053381228908	NLRP3/IL1B/TNF/PTGS2	4
GOBP_GLIAL_CELL_DEVELOPMENT	GOBP_GLIAL_CELL_DEVELOPMENT	GOBP_GLIAL_CELL_DEVELOPMENT	6/201	115/17872	0.00191446448682255	0.0188476817300054	0.0135346021562754	IL1B/FPR2/PTEN/LDLR/TNF/TLR4	6
GOBP_POSITIVE_REGULATION_OF_ADAPTIVE_IMMUNE_RESPONSE	GOBP_POSITIVE_REGULATION_OF_ADAPTIVE_IMMUNE_RESPONSE	GOBP_POSITIVE_REGULATION_OF_ADAPTIVE_IMMUNE_RESPONSE	6/201	115/17872	0.00191446448682255	0.0188476817300054	0.0135346021562754	NLRP3/IL1B/NFKBIZ/SLAMF1/CD55/TNF	6
GOBP_T_CELL_ACTIVATION_INVOLVED_IN_IMMUNE_RESPONSE	GOBP_T_CELL_ACTIVATION_INVOLVED_IN_IMMUNE_RESPONSE	GOBP_T_CELL_ACTIVATION_INVOLVED_IN_IMMUNE_RESPONSE	6/201	116/17872	0.00200035319043332	0.0195939163528824	0.0140704764818588	NLRP3/NFKBIZ/BCL6/GPR183/ICAM1/STAT3	6
GOBP_NEGATIVE_REGULATION_OF_PROTEOLYSIS	GOBP_NEGATIVE_REGULATION_OF_PROTEOLYSIS	GOBP_NEGATIVE_REGULATION_OF_PROTEOLYSIS	11/201	348/17872	0.00200340076688875	0.0195939163528824	0.0140704764818588	IL1R2/SERPINB9/BIRC3/CD44/THBS1/N4BP1/TNFAIP8/HIPK2/TNF/PTGS2/CTSB	11
GOBP_RESPONSE_TO_MONOSACCHARIDE	GOBP_RESPONSE_TO_MONOSACCHARIDE	GOBP_RESPONSE_TO_MONOSACCHARIDE	8/201	201/17872	0.00201487527315907	0.0196417416334429	0.0141048200236626	SOD2/IL1A/THBS1/ICAM1/PRKCE/PTGS2/KLF7/EGR1	8
GOBP_ACUTE_PHASE_RESPONSE	GOBP_ACUTE_PHASE_RESPONSE	GOBP_ACUTE_PHASE_RESPONSE	4/201	48/17872	0.00205224318840593	0.0197220458312491	0.0141624868170834	IL1B/IL1A/TNF/PTGS2	4
GOBP_CELLULAR_RESPONSE_TO_AMYLOID_BETA	GOBP_CELLULAR_RESPONSE_TO_AMYLOID_BETA	GOBP_CELLULAR_RESPONSE_TO_AMYLOID_BETA	4/201	48/17872	0.00205224318840593	0.0197220458312491	0.0141624868170834	FPR2/ICAM1/TNF/TLR4	4
GOBP_KERATINOCYTE_PROLIFERATION	GOBP_KERATINOCYTE_PROLIFERATION	GOBP_KERATINOCYTE_PROLIFERATION	4/201	48/17872	0.00205224318840593	0.0197220458312491	0.0141624868170834	ZFP36/AREG/EREG/KLF9	4
GOBP_VASODILATION	GOBP_VASODILATION	GOBP_VASODILATION	4/201	48/17872	0.00205224318840593	0.0197220458312491	0.0141624868170834	SOD2/GCH1/TNF/KCNMA1	4
GOBP_REGULATION_OF_PEPTIDASE_ACTIVITY	GOBP_REGULATION_OF_PEPTIDASE_ACTIVITY	GOBP_REGULATION_OF_PEPTIDASE_ACTIVITY	13/201	457/17872	0.00205674835451406	0.0197220458312491	0.0141624868170834	NLRP3/CFLAR/PMAIP1/SERPINB9/BIRC3/CD44/THBS1/TNFAIP8/TNF/PTGS2/CTSB/STAT3/MEFV	13
GOBP_REGULATION_OF_METAL_ION_TRANSPORT	GOBP_REGULATION_OF_METAL_ION_TRANSPORT	GOBP_REGULATION_OF_METAL_ION_TRANSPORT	12/201	403/17872	0.00208691819817173	0.0197220458312491	0.0141624868170834	CCL4/PDE4B/KCNIP4/SESTD1/ATP1A1/CCL3/PRKCE/PTGS2/KCNJ2/LILRA5/VMP1/PKP2	12
GOBP_INTERFERON_GAMMA_PRODUCTION	GOBP_INTERFERON_GAMMA_PRODUCTION	GOBP_INTERFERON_GAMMA_PRODUCTION	6/201	117/17872	0.00208912501875914	0.0197220458312491	0.0141624868170834	IL1B/SCGB1A1/SLAMF1/PDE4B/TNF/TLR4	6
GOBP_POSITIVE_REGULATION_OF_CELLULAR_PROTEIN_CATABOLIC_PROCESS	GOBP_POSITIVE_REGULATION_OF_CELLULAR_PROTEIN_CATABOLIC_PROCESS	GOBP_POSITIVE_REGULATION_OF_CELLULAR_PROTEIN_CATABOLIC_PROCESS	7/201	158/17872	0.0020936541364208	0.0197220458312491	0.0141624868170834	TNFAIP3/RNF144B/RNF19B/PTEN/LDLR/PLK3/NFE2L2	7
GOBP_REGULATION_OF_EPITHELIAL_CELL_DIFFERENTIATION	GOBP_REGULATION_OF_EPITHELIAL_CELL_DIFFERENTIATION	GOBP_REGULATION_OF_EPITHELIAL_CELL_DIFFERENTIATION	7/201	158/17872	0.0020936541364208	0.0197220458312491	0.0141624868170834	IL1B/IL1A/ZFP36/TNF/KLF7/MAFF/PRKCH	7
GOBP_LIVER_MORPHOGENESIS	GOBP_LIVER_MORPHOGENESIS	GOBP_LIVER_MORPHOGENESIS	3/201	23/17872	0.00210245074567121	0.0197220458312491	0.0141624868170834	TNFAIP3/CFLAR/TNF	3
GOBP_OVULATION	GOBP_OVULATION	GOBP_OVULATION	3/201	23/17872	0.00210245074567121	0.0197220458312491	0.0141624868170834	EREG/TNFAIP6/PTGS2	3
GOBP_POSITIVE_REGULATION_OF_STEROID_BIOSYNTHETIC_PROCESS	GOBP_POSITIVE_REGULATION_OF_STEROID_BIOSYNTHETIC_PROCESS	GOBP_POSITIVE_REGULATION_OF_STEROID_BIOSYNTHETIC_PROCESS	3/201	23/17872	0.00210245074567121	0.0197220458312491	0.0141624868170834	IL1A/TNF/ADM	3
GOBP_POSITIVE_REGULATION_OF_HEMOPOIESIS	GOBP_POSITIVE_REGULATION_OF_HEMOPOIESIS	GOBP_POSITIVE_REGULATION_OF_HEMOPOIESIS	7/201	159/17872	0.00216965947223985	0.0202252943927858	0.0145238717960793	NLRP3/ZBTB16/NFKBIZ/RHOH/BCL6/TNF/IL2RA	7
GOBP_REGULATION_OF_VIRAL_PROCESS	GOBP_REGULATION_OF_VIRAL_PROCESS	GOBP_REGULATION_OF_VIRAL_PROCESS	7/201	159/17872	0.00216965947223985	0.0202252943927858	0.0145238717960793	ZFP36/N4BP1/CH25H/ISG20/TNF/CXCL8/TNIP1	7
GOBP_LYMPHOCYTE_MIGRATION	GOBP_LYMPHOCYTE_MIGRATION	GOBP_LYMPHOCYTE_MIGRATION	6/201	118/17872	0.00218084138473852	0.0202661989117602	0.0145532455089126	CCL4/GPR183/CCL20/CH25H/ICAM1/CCL3	6
GOBP_NEGATIVE_REGULATION_OF_MYELOID_LEUKOCYTE_DIFFERENTIATION	GOBP_NEGATIVE_REGULATION_OF_MYELOID_LEUKOCYTE_DIFFERENTIATION	GOBP_NEGATIVE_REGULATION_OF_MYELOID_LEUKOCYTE_DIFFERENTIATION	4/201	49/17872	0.00221525073795606	0.0204584921093589	0.0146913320897526	CCL3/PTPN2/TNFAIP6/TLR4	4
GOBP_PROGRAMMED_NECROTIC_CELL_DEATH	GOBP_PROGRAMMED_NECROTIC_CELL_DEATH	GOBP_PROGRAMMED_NECROTIC_CELL_DEATH	4/201	49/17872	0.00221525073795606	0.0204584921093589	0.0146913320897526	PELI1/CFLAR/BIRC3/TNF	4
GOBP_REGULATION_OF_VASCULATURE_DEVELOPMENT	GOBP_REGULATION_OF_VASCULATURE_DEVELOPMENT	GOBP_REGULATION_OF_VASCULATURE_DEVELOPMENT	11/201	353/17872	0.00223827139751509	0.0206072949962578	0.0147981880894841	IL1B/TNFAIP3/IL1A/THBS1/HIPK2/TNF/ADM/NFE2L2/CXCL8/STAT3/FLT1	11
GOBP_EPIDERMAL_CELL_DIFFERENTIATION	GOBP_EPIDERMAL_CELL_DIFFERENTIATION	GOBP_EPIDERMAL_CELL_DIFFERENTIATION	8/201	205/17872	0.00227754621643997	0.0209043703496629	0.0150115191917582	CLIC4/IL1A/ZFP36/EREG/KLF7/MAFF/SAV1/PRKCH	8
GOBP_CD4_POSITIVE_ALPHA_BETA_T_CELL_DIFFERENTIATION	GOBP_CD4_POSITIVE_ALPHA_BETA_T_CELL_DIFFERENTIATION	GOBP_CD4_POSITIVE_ALPHA_BETA_T_CELL_DIFFERENTIATION	5/201	82/17872	0.00231794838182641	0.0212099387208226	0.0152309491669898	NLRP3/NFKBIZ/BCL6/GPR183/STAT3	5
GOBP_MYELOID_CELL_HOMEOSTASIS	GOBP_MYELOID_CELL_HOMEOSTASIS	GOBP_MYELOID_CELL_HOMEOSTASIS	7/201	161/17872	0.00232805584669239	0.021237280093833	0.0152505831257654	ZFP36/PDE4B/BCL6/RBFOX2/HIPK2/PTPN2/STAT3	7
GOBP_INSULIN_RECEPTOR_SIGNALING_PATHWAY	GOBP_INSULIN_RECEPTOR_SIGNALING_PATHWAY	GOBP_INSULIN_RECEPTOR_SIGNALING_PATHWAY	6/201	120/17872	0.00237335517038778	0.0215767618384922	0.0154943664418835	IL1B/PTPN1/INSR/PTPN2/NAMPT/CCND3	6
GOBP_REGULATION_OF_MEMBRANE_PROTEIN_ECTODOMAIN_PROTEOLYSIS	GOBP_REGULATION_OF_MEMBRANE_PROTEIN_ECTODOMAIN_PROTEOLYSIS	GOBP_REGULATION_OF_MEMBRANE_PROTEIN_ECTODOMAIN_PROTEOLYSIS	3/201	24/17872	0.00238304210577953	0.0215767618384922	0.0154943664418835	IL1B/TNF/SNX9	3
GOBP_POSITIVE_REGULATION_OF_EXTRINSIC_APOPTOTIC_SIGNALING_PATHWAY	GOBP_POSITIVE_REGULATION_OF_EXTRINSIC_APOPTOTIC_SIGNALING_PATHWAY	GOBP_POSITIVE_REGULATION_OF_EXTRINSIC_APOPTOTIC_SIGNALING_PATHWAY	4/201	50/17872	0.00238696996537125	0.0215767618384922	0.0154943664418835	PMAIP1/THBS1/PTEN/TNF	4
GOBP_PHAGOCYTOSIS	GOBP_PHAGOCYTOSIS	GOBP_PHAGOCYTOSIS	10/201	305/17872	0.00244246199878911	0.0219627770689108	0.0157715656563451	IL1B/FPR2/HCK/THBS1/RHOH/SLAMF1/LDLR/TNF/PRKCE/TLR4	10
GOBP_RESPONSE_TO_VITAMIN	GOBP_RESPONSE_TO_VITAMIN	GOBP_RESPONSE_TO_VITAMIN	5/201	83/17872	0.00244439892285565	0.0219627770689108	0.0157715656563451	SOD2/ALDH1A2/IL1A/KYNU/PTGS2	5
GOBP_RESPONSE_TO_ENDOPLASMIC_RETICULUM_STRESS	GOBP_RESPONSE_TO_ENDOPLASMIC_RETICULUM_STRESS	GOBP_RESPONSE_TO_ENDOPLASMIC_RETICULUM_STRESS	9/201	256/17872	0.00250721459760889	0.022459522956959	0.0161282810372502	PMAIP1/PTPN1/THBS1/PPP1R15A/UBAC2/PTPN2/ATF6/NFE2L2/CXCL8	9
GOBP_NEGATIVE_REGULATION_OF_I_KAPPAB_KINASE_NF_KAPPAB_SIGNALING	GOBP_NEGATIVE_REGULATION_OF_I_KAPPAB_KINASE_NF_KAPPAB_SIGNALING	GOBP_NEGATIVE_REGULATION_OF_I_KAPPAB_KINASE_NF_KAPPAB_SIGNALING	4/201	51/17872	0.00256763069447207	0.0228229842095238	0.0163892841422027	TNFAIP3/RHOH/TNIP3/TNIP1	4
GOBP_REGULATION_OF_GRANULOCYTE_CHEMOTAXIS	GOBP_REGULATION_OF_GRANULOCYTE_CHEMOTAXIS	GOBP_REGULATION_OF_GRANULOCYTE_CHEMOTAXIS	4/201	51/17872	0.00256763069447207	0.0228229842095238	0.0163892841422027	THBS1/SLAMF1/CXCL8/TNFAIP6	4
GOBP_LIPID_LOCALIZATION	GOBP_LIPID_LOCALIZATION	GOBP_LIPID_LOCALIZATION	13/201	469/17872	0.00257442638006987	0.0228229842095238	0.0163892841422027	IL1B/NFKBIA/NFKB1/ACSL1/IL1A/THBS1/AQP9/APOO/EHD1/LDLR/TNF/PTPN2/VMP1	13
GOBP_NEGATIVE_REGULATION_OF_PROTEIN_SERINE_THREONINE_KINASE_ACTIVITY	GOBP_NEGATIVE_REGULATION_OF_PROTEIN_SERINE_THREONINE_KINASE_ACTIVITY	GOBP_NEGATIVE_REGULATION_OF_PROTEIN_SERINE_THREONINE_KINASE_ACTIVITY	6/201	122/17872	0.00257839278531999	0.0228229842095238	0.0163892841422027	IL1B/TNFAIP3/IRAK3/PTPN1/PTEN/DUSP1	6
GOBP_REGULATION_OF_CELLULAR_PROTEIN_CATABOLIC_PROCESS	GOBP_REGULATION_OF_CELLULAR_PROTEIN_CATABOLIC_PROCESS	GOBP_REGULATION_OF_CELLULAR_PROTEIN_CATABOLIC_PROCESS	9/201	258/17872	0.00264119661852571	0.0232221371933877	0.0166759176345057	TNFAIP3/RNF144B/RNF19B/PTEN/N4BP1/LDLR/HIPK2/PLK3/NFE2L2	9
GOBP_CELLULAR_RESPONSE_TO_OXYGEN_RADICAL	GOBP_CELLULAR_RESPONSE_TO_OXYGEN_RADICAL	GOBP_CELLULAR_RESPONSE_TO_OXYGEN_RADICAL	3/201	25/17872	0.00268574599962525	0.0232221371933877	0.0166759176345057	SOD2/GCH1/NFE2L2	3
GOBP_INFLAMMASOME_COMPLEX_ASSEMBLY	GOBP_INFLAMMASOME_COMPLEX_ASSEMBLY	GOBP_INFLAMMASOME_COMPLEX_ASSEMBLY	3/201	25/17872	0.00268574599962525	0.0232221371933877	0.0166759176345057	NLRP3/TLR4/MEFV	3
GOBP_INTERFERON_GAMMA_MEDIATED_SIGNALING_PATHWAY	GOBP_INTERFERON_GAMMA_MEDIATED_SIGNALING_PATHWAY	GOBP_INTERFERON_GAMMA_MEDIATED_SIGNALING_PATHWAY	3/201	25/17872	0.00268574599962525	0.0232221371933877	0.0166759176345057	HCK/PTPN2/IRF1	3
GOBP_POSITIVE_REGULATION_OF_FATTY_ACID_TRANSPORT	GOBP_POSITIVE_REGULATION_OF_FATTY_ACID_TRANSPORT	GOBP_POSITIVE_REGULATION_OF_FATTY_ACID_TRANSPORT	3/201	25/17872	0.00268574599962525	0.0232221371933877	0.0166759176345057	IL1B/ACSL1/IL1A	3
GOBP_POSITIVE_REGULATION_OF_MACROPHAGE_MIGRATION	GOBP_POSITIVE_REGULATION_OF_MACROPHAGE_MIGRATION	GOBP_POSITIVE_REGULATION_OF_MACROPHAGE_MIGRATION	3/201	25/17872	0.00268574599962525	0.0232221371933877	0.0166759176345057	THBS1/SLAMF1/CCL3	3
GOBP_REGULATION_OF_CELL_MATRIX_ADHESION	GOBP_REGULATION_OF_CELL_MATRIX_ADHESION	GOBP_REGULATION_OF_CELL_MATRIX_ADHESION	6/201	123/17872	0.00268576511287924	0.0232221371933877	0.0166759176345057	THBS1/FMN1/PTEN/BCL6/RIN2/SDC4	6
GOBP_RESPONSE_TO_ESTRADIOL	GOBP_RESPONSE_TO_ESTRADIOL	GOBP_RESPONSE_TO_ESTRADIOL	6/201	123/17872	0.00268576511287924	0.0232221371933877	0.0166759176345057	ALDH1A2/CFLAR/AREG/LCOR/PTGS2/STAT3	6
GOBP_REGULATION_OF_PEPTIDYL_TYROSINE_PHOSPHORYLATION	GOBP_REGULATION_OF_PEPTIDYL_TYROSINE_PHOSPHORYLATION	GOBP_REGULATION_OF_PEPTIDYL_TYROSINE_PHOSPHORYLATION	9/201	261/17872	0.00285275452796365	0.0245238235069613	0.0176106642329927	SAMSN1/AREG/PTPN1/CD44/EREG/TNF/PTPN2/PRKCE/LILRA5	9
GOBP_RESPONSE_TO_INSULIN	GOBP_RESPONSE_TO_INSULIN	GOBP_RESPONSE_TO_INSULIN	9/201	261/17872	0.00285275452796365	0.0245238235069613	0.0176106642329927	IL1B/CFLAR/PTPN1/INSR/PTPN2/ADM/NAMPT/CCND3/EGR1	9
GOBP_MULTI_MULTICELLULAR_ORGANISM_PROCESS	GOBP_MULTI_MULTICELLULAR_ORGANISM_PROCESS	GOBP_MULTI_MULTICELLULAR_ORGANISM_PROCESS	8/201	213/17872	0.00288318861753774	0.0247142288681468	0.0177473951503004	IL1B/SCGB1A1/ADM/CSMD1/PTGS2/CTSB/MAFF/VMP1	8
GOBP_REGULATION_OF_UBIQUITIN_DEPENDENT_PROTEIN_CATABOLIC_PROCESS	GOBP_REGULATION_OF_UBIQUITIN_DEPENDENT_PROTEIN_CATABOLIC_PROCESS	GOBP_REGULATION_OF_UBIQUITIN_DEPENDENT_PROTEIN_CATABOLIC_PROCESS	7/201	168/17872	0.00295365809644078	0.0249852541132021	0.0179420195565631	RNF144B/RNF19B/PTEN/N4BP1/HIPK2/PLK3/NFE2L2	7
GOBP_ESTABLISHMENT_OF_ENDOTHELIAL_BARRIER	GOBP_ESTABLISHMENT_OF_ENDOTHELIAL_BARRIER	GOBP_ESTABLISHMENT_OF_ENDOTHELIAL_BARRIER	4/201	53/17872	0.00295668612201151	0.0249852541132021	0.0179420195565631	IL1B/RAPGEF2/ICAM1/TNF	4
GOBP_NEGATIVE_REGULATION_OF_INTERLEUKIN_1_PRODUCTION	GOBP_NEGATIVE_REGULATION_OF_INTERLEUKIN_1_PRODUCTION	GOBP_NEGATIVE_REGULATION_OF_INTERLEUKIN_1_PRODUCTION	4/201	53/17872	0.00295668612201151	0.0249852541132021	0.0179420195565631	NLRP3/TNFAIP3/IL1R2/MEFV	4
GOBP_POSITIVE_REGULATION_OF_ACTIN_FILAMENT_POLYMERIZATION	GOBP_POSITIVE_REGULATION_OF_ACTIN_FILAMENT_POLYMERIZATION	GOBP_POSITIVE_REGULATION_OF_ACTIN_FILAMENT_POLYMERIZATION	4/201	53/17872	0.00295668612201151	0.0249852541132021	0.0179420195565631	HCK/FMN1/PRKCE/SNX9	4
GOBP_REGULATION_OF_DNA_TEMPLATED_TRANSCRIPTION_IN_RESPONSE_TO_STRESS	GOBP_REGULATION_OF_DNA_TEMPLATED_TRANSCRIPTION_IN_RESPONSE_TO_STRESS	GOBP_REGULATION_OF_DNA_TEMPLATED_TRANSCRIPTION_IN_RESPONSE_TO_STRESS	4/201	53/17872	0.00295668612201151	0.0249852541132021	0.0179420195565631	ATF6/NFE2L2/BACH1/EGR1	4
GOBP_REGULATION_OF_VIRAL_GENOME_REPLICATION	GOBP_REGULATION_OF_VIRAL_GENOME_REPLICATION	GOBP_REGULATION_OF_VIRAL_GENOME_REPLICATION	5/201	87/17872	0.0030006949834167	0.0252855173320114	0.0181576398788373	N4BP1/ISG20/TNF/CXCL8/TNIP1	5
GOBP_NEGATIVE_REGULATION_OF_EPITHELIAL_CELL_APOPTOTIC_PROCESS	GOBP_NEGATIVE_REGULATION_OF_EPITHELIAL_CELL_APOPTOTIC_PROCESS	GOBP_NEGATIVE_REGULATION_OF_EPITHELIAL_CELL_APOPTOTIC_PROCESS	4/201	54/17872	0.00316553024129429	0.0265993710134673	0.019101123917076	TNFAIP3/CFLAR/ICAM1/NFE2L2	4
GOBP_DEPHOSPHORYLATION	GOBP_DEPHOSPHORYLATION	GOBP_DEPHOSPHORYLATION	12/201	425/17872	0.00321764269903891	0.0269613150877333	0.0193610375296989	PFKFB3/PTPN1/PPP1R15A/PTEN/ENSA/ATP1A1/DUSP1/TNF/PTPN2/DUSP6/PTPN12/PLEK	12
GOBP_REGULATION_OF_INTRINSIC_APOPTOTIC_SIGNALING_PATHWAY	GOBP_REGULATION_OF_INTRINSIC_APOPTOTIC_SIGNALING_PATHWAY	GOBP_REGULATION_OF_INTRINSIC_APOPTOTIC_SIGNALING_PATHWAY	7/201	171/17872	0.00325811219645627	0.0272239458880366	0.0195496338487056	SOD2/PMAIP1/PTPN1/CD44/PTPN2/NFE2L2/PTGS2	7
GOBP_LEUKOCYTE_HOMEOSTASIS	GOBP_LEUKOCYTE_HOMEOSTASIS	GOBP_LEUKOCYTE_HOMEOSTASIS	5/201	89/17872	0.00331068887721645	0.0275859913987058	0.0198096203032504	TNFAIP3/PMAIP1/PDE4B/GPR183/IL2RA	5
GOBP_ADENYLATE_CYCLASE_ACTIVATING_ADRENERGIC_RECEPTOR_SIGNALING_PATHWAY	GOBP_ADENYLATE_CYCLASE_ACTIVATING_ADRENERGIC_RECEPTOR_SIGNALING_PATHWAY	GOBP_ADENYLATE_CYCLASE_ACTIVATING_ADRENERGIC_RECEPTOR_SIGNALING_PATHWAY	3/201	27/17872	0.00335970110147299	0.0276578403167472	0.0198612153235283	PDE4B/RAPGEF2/AKAP13	3
GOBP_POSITIVE_REGULATION_OF_ACUTE_INFLAMMATORY_RESPONSE	GOBP_POSITIVE_REGULATION_OF_ACUTE_INFLAMMATORY_RESPONSE	GOBP_POSITIVE_REGULATION_OF_ACUTE_INFLAMMATORY_RESPONSE	3/201	27/17872	0.00335970110147299	0.0276578403167472	0.0198612153235283	IL1B/TNF/PTGS2	3
GOBP_POSITIVE_REGULATION_OF_CYTOKINE_PRODUCTION_INVOLVED_IN_INFLAMMATORY_RESPONSE	GOBP_POSITIVE_REGULATION_OF_CYTOKINE_PRODUCTION_INVOLVED_IN_INFLAMMATORY_RESPONSE	GOBP_POSITIVE_REGULATION_OF_CYTOKINE_PRODUCTION_INVOLVED_IN_INFLAMMATORY_RESPONSE	3/201	27/17872	0.00335970110147299	0.0276578403167472	0.0198612153235283	TNF/STAT3/TLR4	3
GOBP_NEGATIVE_REGULATION_OF_G_PROTEIN_COUPLED_RECEPTOR_SIGNALING_PATHWAY	GOBP_NEGATIVE_REGULATION_OF_G_PROTEIN_COUPLED_RECEPTOR_SIGNALING_PATHWAY	GOBP_NEGATIVE_REGULATION_OF_G_PROTEIN_COUPLED_RECEPTOR_SIGNALING_PATHWAY	4/201	55/17872	0.00338421445377564	0.0276578403167472	0.0198612153235283	PDE4B/ADM/CXCL8/PLEK	4
GOBP_NEGATIVE_REGULATION_OF_LYMPHOCYTE_MEDIATED_IMMUNITY	GOBP_NEGATIVE_REGULATION_OF_LYMPHOCYTE_MEDIATED_IMMUNITY	GOBP_NEGATIVE_REGULATION_OF_LYMPHOCYTE_MEDIATED_IMMUNITY	4/201	55/17872	0.00338421445377564	0.0276578403167472	0.0198612153235283	SERPINB9/SLAMF1/BCL6/CD55	4
GOBP_PLATELET_DERIVED_GROWTH_FACTOR_RECEPTOR_SIGNALING_PATHWAY	GOBP_PLATELET_DERIVED_GROWTH_FACTOR_RECEPTOR_SIGNALING_PATHWAY	GOBP_PLATELET_DERIVED_GROWTH_FACTOR_RECEPTOR_SIGNALING_PATHWAY	4/201	55/17872	0.00338421445377564	0.0276578403167472	0.0198612153235283	ZFAND5/PTPN1/PTPN2/PTPN12	4
GOBP_POSITIVE_REGULATION_OF_PROTEIN_TYROSINE_KINASE_ACTIVITY	GOBP_POSITIVE_REGULATION_OF_PROTEIN_TYROSINE_KINASE_ACTIVITY	GOBP_POSITIVE_REGULATION_OF_PROTEIN_TYROSINE_KINASE_ACTIVITY	4/201	55/17872	0.00338421445377564	0.0276578403167472	0.0198612153235283	AREG/PTPN1/EREG/LILRA5	4
GOBP_REGULATION_OF_TRANS_SYNAPTIC_SIGNALING	GOBP_REGULATION_OF_TRANS_SYNAPTIC_SIGNALING	GOBP_REGULATION_OF_TRANS_SYNAPTIC_SIGNALING	12/201	429/17872	0.00346858081268626	0.0282371810798902	0.0202772424431697	IL1B/SIPA1L1/DLGAP1/PTEN/MCTP1/SLC1A3/RAPGEF2/TNF/PRKCE/PTGS2/SYN1/EIF4E	12
GOBP_REGULATION_OF_PROTEIN_TYROSINE_KINASE_ACTIVITY	GOBP_REGULATION_OF_PROTEIN_TYROSINE_KINASE_ACTIVITY	GOBP_REGULATION_OF_PROTEIN_TYROSINE_KINASE_ACTIVITY	5/201	90/17872	0.00347403468197107	0.0282371810798902	0.0202772424431697	AREG/PTPN1/EREG/PTPN2/LILRA5	5
GOBP_POSITIVE_REGULATION_OF_CELLULAR_CARBOHYDRATE_METABOLIC_PROCESS	GOBP_POSITIVE_REGULATION_OF_CELLULAR_CARBOHYDRATE_METABOLIC_PROCESS	GOBP_POSITIVE_REGULATION_OF_CELLULAR_CARBOHYDRATE_METABOLIC_PROCESS	4/201	56/17872	0.00361295760564408	0.0292865558087942	0.0210308029962406	PMAIP1/INSR/PTPN2/PRKCE	4
GOBP_NEGATIVE_REGULATION_OF_LEUKOCYTE_PROLIFERATION	GOBP_NEGATIVE_REGULATION_OF_LEUKOCYTE_PROLIFERATION	GOBP_NEGATIVE_REGULATION_OF_LEUKOCYTE_PROLIFERATION	5/201	91/17872	0.00364309376380803	0.0294508094781554	0.0211487542700024	TNFAIP3/PELI1/SCGB1A1/SDC4/IL2RA	5
GOBP_AMINOGLYCAN_METABOLIC_PROCESS	GOBP_AMINOGLYCAN_METABOLIC_PROCESS	GOBP_AMINOGLYCAN_METABOLIC_PROCESS	6/201	131/17872	0.0036696373008201	0.0295852109955307	0.0212452685836953	IL1B/NFKB1/CD44/TNFAIP6/CHST11/CSGALNACT2	6
GOBP_REGULATION_OF_LYMPHOCYTE_MEDIATED_IMMUNITY	GOBP_REGULATION_OF_LYMPHOCYTE_MEDIATED_IMMUNITY	GOBP_REGULATION_OF_LYMPHOCYTE_MEDIATED_IMMUNITY	7/201	175/17872	0.00370066692722588	0.0297549580698512	0.021367164695431	NLRP3/IL1B/SERPINB9/SLAMF1/BCL6/CD55/TNF	7
GOBP_NEGATIVE_REGULATION_OF_TRANSFERASE_ACTIVITY	GOBP_NEGATIVE_REGULATION_OF_TRANSFERASE_ACTIVITY	GOBP_NEGATIVE_REGULATION_OF_TRANSFERASE_ACTIVITY	9/201	272/17872	0.00374568281538603	0.0300359458018724	0.0215689432068777	IL1B/TNFAIP3/IRAK3/ZFP36/PTPN1/PTEN/DUSP1/GADD45B/PTPN2	9
GOBP_POSITIVE_REGULATION_OF_SUPRAMOLECULAR_FIBER_ORGANIZATION	GOBP_POSITIVE_REGULATION_OF_SUPRAMOLECULAR_FIBER_ORGANIZATION	GOBP_POSITIVE_REGULATION_OF_SUPRAMOLECULAR_FIBER_ORGANIZATION	7/201	176/17872	0.00381812450893326	0.0304531160699142	0.0218685149892462	HCK/FMN1/PRKCE/SDC4/SNX9/PLEK/MTSS1	7
GOBP_STEROID_BIOSYNTHETIC_PROCESS	GOBP_STEROID_BIOSYNTHETIC_PROCESS	GOBP_STEROID_BIOSYNTHETIC_PROCESS	7/201	176/17872	0.00381812450893326	0.0304531160699142	0.0218685149892462	NFKB1/IL1A/ATP1A1/CH25H/TNF/ADM/EGR1	7
GOBP_POSITIVE_REGULATION_OF_ION_TRANSPORT	GOBP_POSITIVE_REGULATION_OF_ION_TRANSPORT	GOBP_POSITIVE_REGULATION_OF_ION_TRANSPORT	9/201	273/17872	0.00383663185624428	0.0304786323179534	0.0218868383178486	IL1B/CCL4/IL1A/IFNGR2/CCL3/KCNJ2/LILRA5/VMP1/PKP2	9
GOBP_EMBRYO_IMPLANTATION	GOBP_EMBRYO_IMPLANTATION	GOBP_EMBRYO_IMPLANTATION	4/201	57/17872	0.0038519759919103	0.0304786323179534	0.0218868383178486	IL1B/SCGB1A1/PTGS2/VMP1	4
GOBP_NEGATIVE_REGULATION_OF_VIRAL_GENOME_REPLICATION	GOBP_NEGATIVE_REGULATION_OF_VIRAL_GENOME_REPLICATION	GOBP_NEGATIVE_REGULATION_OF_VIRAL_GENOME_REPLICATION	4/201	57/17872	0.0038519759919103	0.0304786323179534	0.0218868383178486	N4BP1/ISG20/TNF/TNIP1	4
GOBP_REGULATION_OF_WOUND_HEALING	GOBP_REGULATION_OF_WOUND_HEALING	GOBP_REGULATION_OF_WOUND_HEALING	6/201	133/17872	0.00395266000177302	0.0311925523420342	0.0223995073896076	TNFAIP3/THBS1/PTEN/TNF/PRKCE/NFE2L2	6
GOBP_ERYTHROCYTE_HOMEOSTASIS	GOBP_ERYTHROCYTE_HOMEOSTASIS	GOBP_ERYTHROCYTE_HOMEOSTASIS	6/201	134/17872	0.00410008671299582	0.0320708805672419	0.0230302387050611	ZFP36/BCL6/RBFOX2/HIPK2/PTPN2/STAT3	6
GOBP_P38MAPK_CASCADE	GOBP_P38MAPK_CASCADE	GOBP_P38MAPK_CASCADE	4/201	58/17872	0.00410148325063588	0.0320708805672419	0.0230302387050611	IL1B/ZFP36/DUSP1/GADD45B	4
GOBP_RESPONSE_TO_AMYLOID_BETA	GOBP_RESPONSE_TO_AMYLOID_BETA	GOBP_RESPONSE_TO_AMYLOID_BETA	4/201	58/17872	0.00410148325063588	0.0320708805672419	0.0230302387050611	FPR2/ICAM1/TNF/TLR4	4
GOBP_L_GLUTAMATE_TRANSMEMBRANE_TRANSPORT	GOBP_L_GLUTAMATE_TRANSMEMBRANE_TRANSPORT	GOBP_L_GLUTAMATE_TRANSMEMBRANE_TRANSPORT	3/201	29/17872	0.00412846736098588	0.0320708805672419	0.0230302387050611	SLC1A3/TNF/SLC1A2	3
GOBP_POSITIVE_REGULATION_OF_VASCULAR_ENDOTHELIAL_GROWTH_FACTOR_PRODUCTION	GOBP_POSITIVE_REGULATION_OF_VASCULAR_ENDOTHELIAL_GROWTH_FACTOR_PRODUCTION	GOBP_POSITIVE_REGULATION_OF_VASCULAR_ENDOTHELIAL_GROWTH_FACTOR_PRODUCTION	3/201	29/17872	0.00412846736098588	0.0320708805672419	0.0230302387050611	IL1B/IL1A/PTGS2	3
GOBP_RESPONSE_TO_OXYGEN_RADICAL	GOBP_RESPONSE_TO_OXYGEN_RADICAL	GOBP_RESPONSE_TO_OXYGEN_RADICAL	3/201	29/17872	0.00412846736098588	0.0320708805672419	0.0230302387050611	SOD2/GCH1/NFE2L2	3
GOBP_CELLULAR_RESPONSE_TO_KETONE	GOBP_CELLULAR_RESPONSE_TO_KETONE	GOBP_CELLULAR_RESPONSE_TO_KETONE	5/201	94/17872	0.00418565296270744	0.0324306565915747	0.0232885954316053	CFLAR/KLF9/PRKCE/GNG2/EIF4E	5
GOBP_REGULATION_OF_HORMONE_LEVELS	GOBP_REGULATION_OF_HORMONE_LEVELS	GOBP_REGULATION_OF_HORMONE_LEVELS	13/201	499/17872	0.00434873467753542	0.0334471003922391	0.024018508142	IL1B/ALDH1A2/NFKB1/IL1RN/ENSA/ATP1A1/TNF/PRKCE/ADM/CTSB/KLF7/ECE1/EGR1	13
GOBP_NEGATIVE_REGULATION_OF_ADAPTIVE_IMMUNE_RESPONSE	GOBP_NEGATIVE_REGULATION_OF_ADAPTIVE_IMMUNE_RESPONSE	GOBP_NEGATIVE_REGULATION_OF_ADAPTIVE_IMMUNE_RESPONSE	4/201	59/17872	0.00436169026234697	0.0334471003922391	0.024018508142	SAMSN1/SLAMF1/BCL6/CD55	4
GOBP_POSITIVE_REGULATION_OF_OXIDOREDUCTASE_ACTIVITY	GOBP_POSITIVE_REGULATION_OF_OXIDOREDUCTASE_ACTIVITY	GOBP_POSITIVE_REGULATION_OF_OXIDOREDUCTASE_ACTIVITY	4/201	59/17872	0.00436169026234697	0.0334471003922391	0.024018508142	IL1B/GCH1/TNF/ABL2	4
GOBP_POSITIVE_REGULATION_OF_T_CELL_MEDIATED_IMMUNITY	GOBP_POSITIVE_REGULATION_OF_T_CELL_MEDIATED_IMMUNITY	GOBP_POSITIVE_REGULATION_OF_T_CELL_MEDIATED_IMMUNITY	4/201	59/17872	0.00436169026234697	0.0334471003922391	0.024018508142	NLRP3/IL1B/SLAMF1/CD55	4
GOBP_POSITIVE_REGULATION_OF_SMOOTH_MUSCLE_CELL_PROLIFERATION	GOBP_POSITIVE_REGULATION_OF_SMOOTH_MUSCLE_CELL_PROLIFERATION	GOBP_POSITIVE_REGULATION_OF_SMOOTH_MUSCLE_CELL_PROLIFERATION	5/201	95/17872	0.00437866625384971	0.0334911831672658	0.0240501641743162	THBS1/EREG/TNF/PTGS2/TLR4	5
GOBP_NEGATIVE_REGULATION_OF_CELL_CYCLE	GOBP_NEGATIVE_REGULATION_OF_CELL_CYCLE	GOBP_NEGATIVE_REGULATION_OF_CELL_CYCLE	11/201	387/17872	0.00449450888915013	0.0341849402802447	0.0245483541719914	TNFAIP3/GPR132/PTEN/TP53BP2/BCL6/DUSP1/TNF/PLK3/PTGS2/TEX14/BTG2	11
GOBP_MYELOID_LEUKOCYTE_CYTOKINE_PRODUCTION	GOBP_MYELOID_LEUKOCYTE_CYTOKINE_PRODUCTION	GOBP_MYELOID_LEUKOCYTE_CYTOKINE_PRODUCTION	3/201	30/17872	0.00454958809629806	0.0341849402802447	0.0245483541719914	IRAK3/BCL6/TLR4	3
GOBP_NEGATIVE_REGULATION_OF_OSTEOCLAST_DIFFERENTIATION	GOBP_NEGATIVE_REGULATION_OF_OSTEOCLAST_DIFFERENTIATION	GOBP_NEGATIVE_REGULATION_OF_OSTEOCLAST_DIFFERENTIATION	3/201	30/17872	0.00454958809629806	0.0341849402802447	0.0245483541719914	CCL3/TNFAIP6/TLR4	3
GOBP_POSITIVE_REGULATION_OF_MACROPHAGE_ACTIVATION	GOBP_POSITIVE_REGULATION_OF_MACROPHAGE_ACTIVATION	GOBP_POSITIVE_REGULATION_OF_MACROPHAGE_ACTIVATION	3/201	30/17872	0.00454958809629806	0.0341849402802447	0.0245483541719914	THBS1/CCL3/TLR4	3
GOBP_REGULATION_OF_GLIAL_CELL_PROLIFERATION	GOBP_REGULATION_OF_GLIAL_CELL_PROLIFERATION	GOBP_REGULATION_OF_GLIAL_CELL_PROLIFERATION	3/201	30/17872	0.00454958809629806	0.0341849402802447	0.0245483541719914	IL1B/TNF/PRKCH	3
GOBP_REGULATION_OF_SYNCYTIUM_FORMATION_BY_PLASMA_MEMBRANE_FUSION	GOBP_REGULATION_OF_SYNCYTIUM_FORMATION_BY_PLASMA_MEMBRANE_FUSION	GOBP_REGULATION_OF_SYNCYTIUM_FORMATION_BY_PLASMA_MEMBRANE_FUSION	3/201	30/17872	0.00454958809629806	0.0341849402802447	0.0245483541719914	CFLAR/SCGB3A1/EHD1	3
GOBP_RESPONSE_TO_ANGIOTENSIN	GOBP_RESPONSE_TO_ANGIOTENSIN	GOBP_RESPONSE_TO_ANGIOTENSIN	3/201	30/17872	0.00454958809629806	0.0341849402802447	0.0245483541719914	NFKB1/NFE2L2/PTGS2	3
GOBP_OSTEOCLAST_DIFFERENTIATION	GOBP_OSTEOCLAST_DIFFERENTIATION	GOBP_OSTEOCLAST_DIFFERENTIATION	5/201	96/17872	0.0045779420397611	0.0342666034776163	0.024606996868906	GPR183/TNF/CCL3/TNFAIP6/TLR4	5
GOBP_IMPORT_ACROSS_PLASMA_MEMBRANE	GOBP_IMPORT_ACROSS_PLASMA_MEMBRANE	GOBP_IMPORT_ACROSS_PLASMA_MEMBRANE	7/201	182/17872	0.00458343103840728	0.0342666034776163	0.024606996868906	ACSL1/THBS1/SLC1A3/ATP1A1/TNF/KCNJ2/SLC1A2	7
GOBP_NEGATIVE_REGULATION_OF_MAP_KINASE_ACTIVITY	GOBP_NEGATIVE_REGULATION_OF_MAP_KINASE_ACTIVITY	GOBP_NEGATIVE_REGULATION_OF_MAP_KINASE_ACTIVITY	4/201	60/17872	0.004632805054493	0.0344629862283108	0.0247480201755959	IL1B/IRAK3/PTPN1/DUSP1	4
GOBP_REGULATION_OF_GLUCOSE_IMPORT	GOBP_REGULATION_OF_GLUCOSE_IMPORT	GOBP_REGULATION_OF_GLUCOSE_IMPORT	4/201	60/17872	0.004632805054493	0.0344629862283108	0.0247480201755959	INSR/TNF/NFE2L2/SLC1A2	4
GOBP_REGULATION_OF_BLOOD_PRESSURE	GOBP_REGULATION_OF_BLOOD_PRESSURE	GOBP_REGULATION_OF_BLOOD_PRESSURE	7/201	183/17872	0.00472147748081973	0.0349303032869093	0.025083602586185	SOD2/GCH1/ATP1A1/TNF/ADM/PTGS2/ECE1	7
GOBP_REGULATION_OF_CARBOHYDRATE_METABOLIC_PROCESS	GOBP_REGULATION_OF_CARBOHYDRATE_METABOLIC_PROCESS	GOBP_REGULATION_OF_CARBOHYDRATE_METABOLIC_PROCESS	7/201	183/17872	0.00472147748081973	0.0349303032869093	0.025083602586185	NFKB1/PMAIP1/INSR/PTPN2/PRKCE/STAT3/PLEK	7
GOBP_ENDOTHELIUM_DEVELOPMENT	GOBP_ENDOTHELIUM_DEVELOPMENT	GOBP_ENDOTHELIUM_DEVELOPMENT	6/201	138/17872	0.00473075512165986	0.0349303032869093	0.025083602586185	IL1B/CLIC4/RAPGEF2/ICAM1/TNF/KDM6B	6
GOBP_EPIDERMIS_DEVELOPMENT	GOBP_EPIDERMIS_DEVELOPMENT	GOBP_EPIDERMIS_DEVELOPMENT	10/201	335/17872	0.00474279394376073	0.0349327267512055	0.0250853428864278	CLIC4/IL1A/ZFP36/EREG/INSR/TNF/KLF7/MAFF/SAV1/PRKCH	10
GOBP_CELLULAR_RESPONSE_TO_UNFOLDED_PROTEIN	GOBP_CELLULAR_RESPONSE_TO_UNFOLDED_PROTEIN	GOBP_CELLULAR_RESPONSE_TO_UNFOLDED_PROTEIN	5/201	97/17872	0.00478358922304616	0.0351464203259771	0.0252387971711147	PTPN1/PPP1R15A/PTPN2/ATF6/NFE2L2	5
GOBP_DENDRITE_MORPHOGENESIS	GOBP_DENDRITE_MORPHOGENESIS	GOBP_DENDRITE_MORPHOGENESIS	6/201	139/17872	0.0048989902632119	0.0358472923627263	0.0257420964264686	SIPA1L1/PTEN/RBFOX2/RAPGEF2/IL1RAPL1/KLF7	6
GOBP_CYTOPLASMIC_PATTERN_RECOGNITION_RECEPTOR_SIGNALING_PATHWAY	GOBP_CYTOPLASMIC_PATTERN_RECOGNITION_RECEPTOR_SIGNALING_PATHWAY	GOBP_CYTOPLASMIC_PATTERN_RECOGNITION_RECEPTOR_SIGNALING_PATHWAY	4/201	61/17872	0.00491503271081295	0.0358472923627263	0.0257420964264686	TNFAIP3/NFKBIA/BIRC3/TLR4	4
GOBP_REGULATION_OF_LIPID_CATABOLIC_PROCESS	GOBP_REGULATION_OF_LIPID_CATABOLIC_PROCESS	GOBP_REGULATION_OF_LIPID_CATABOLIC_PROCESS	4/201	61/17872	0.00491503271081295	0.0358472923627263	0.0257420964264686	IL1B/LDLR/TNF/PRKCE	4
GOBP_CHEMOKINE_PRODUCTION	GOBP_CHEMOKINE_PRODUCTION	GOBP_CHEMOKINE_PRODUCTION	5/201	98/17872	0.00499571630015514	0.0360833338544108	0.0259115988474076	IL1B/TNF/TLR4/MEFV/EGR1	5
GOBP_NEGATIVE_REGULATION_OF_EXTRINSIC_APOPTOTIC_SIGNALING_PATHWAY_VIA_DEATH_DOMAIN_RECEPTORS	GOBP_NEGATIVE_REGULATION_OF_EXTRINSIC_APOPTOTIC_SIGNALING_PATHWAY_VIA_DEATH_DOMAIN_RECEPTORS	GOBP_NEGATIVE_REGULATION_OF_EXTRINSIC_APOPTOTIC_SIGNALING_PATHWAY_VIA_DEATH_DOMAIN_RECEPTORS	3/201	31/17872	0.004995781723725	0.0360833338544108	0.0259115988474076	TNFAIP3/CFLAR/ICAM1	3
GOBP_REGULATION_OF_PROGRAMMED_NECROTIC_CELL_DEATH	GOBP_REGULATION_OF_PROGRAMMED_NECROTIC_CELL_DEATH	GOBP_REGULATION_OF_PROGRAMMED_NECROTIC_CELL_DEATH	3/201	31/17872	0.004995781723725	0.0360833338544108	0.0259115988474076	PELI1/CFLAR/BIRC3	3
GOBP_TOLERANCE_INDUCTION	GOBP_TOLERANCE_INDUCTION	GOBP_TOLERANCE_INDUCTION	3/201	31/17872	0.004995781723725	0.0360833338544108	0.0259115988474076	TNFAIP3/IRAK3/IL2RA	3
GOBP_POSITIVE_REGULATION_OF_CHEMOTAXIS	GOBP_POSITIVE_REGULATION_OF_CHEMOTAXIS	GOBP_POSITIVE_REGULATION_OF_CHEMOTAXIS	6/201	140/17872	0.00507158381711512	0.0364967047399161	0.0262084422766658	CCL4/FPR2/THBS1/SLAMF1/CCL3/CXCL8	6
GOBP_NEGATIVE_REGULATION_OF_MITOTIC_CELL_CYCLE	GOBP_NEGATIVE_REGULATION_OF_MITOTIC_CELL_CYCLE	GOBP_NEGATIVE_REGULATION_OF_MITOTIC_CELL_CYCLE	8/201	234/17872	0.00507748322730981	0.0364967047399161	0.0262084422766658	GPR132/PTEN/BCL6/DUSP1/TNF/PLK3/TEX14/BTG2	8
GOBP_REGULATION_OF_CELL_DIVISION	GOBP_REGULATION_OF_CELL_DIVISION	GOBP_REGULATION_OF_CELL_DIVISION	7/201	186/17872	0.0051544765648684	0.0369610663293328	0.0265419023519919	IL1B/OOEP/IL1A/EREG/PLK3/PRKCE/TEX14	7
GOBP_REGULATION_OF_MACROPHAGE_ACTIVATION	GOBP_REGULATION_OF_MACROPHAGE_ACTIVATION	GOBP_REGULATION_OF_MACROPHAGE_ACTIVATION	4/201	62/17872	0.00520857528547487	0.0372594246440564	0.0267561547543641	THBS1/LDLR/CCL3/TLR4	4
GOBP_IMMATURE_T_CELL_PROLIFERATION	GOBP_IMMATURE_T_CELL_PROLIFERATION	GOBP_IMMATURE_T_CELL_PROLIFERATION	2/201	10/17872	0.00533713604664747	0.0373724808149047	0.026837340881956	IL1B/IL1A	2
GOBP_LONG_CHAIN_FATTY_ACID_IMPORT_ACROSS_PLASMA_MEMBRANE	GOBP_LONG_CHAIN_FATTY_ACID_IMPORT_ACROSS_PLASMA_MEMBRANE	GOBP_LONG_CHAIN_FATTY_ACID_IMPORT_ACROSS_PLASMA_MEMBRANE	2/201	10/17872	0.00533713604664747	0.0373724808149047	0.026837340881956	ACSL1/THBS1	2
GOBP_NATURAL_KILLER_CELL_CHEMOTAXIS	GOBP_NATURAL_KILLER_CELL_CHEMOTAXIS	GOBP_NATURAL_KILLER_CELL_CHEMOTAXIS	2/201	10/17872	0.00533713604664747	0.0373724808149047	0.026837340881956	CCL4/CCL3	2
GOBP_POSITIVE_REGULATION_OF_ENDOPLASMIC_RETICULUM_STRESS_INDUCED_INTRINSIC_APOPTOTIC_SIGNALING_PATHWAY	GOBP_POSITIVE_REGULATION_OF_ENDOPLASMIC_RETICULUM_STRESS_INDUCED_INTRINSIC_APOPTOTIC_SIGNALING_PATHWAY	GOBP_POSITIVE_REGULATION_OF_ENDOPLASMIC_RETICULUM_STRESS_INDUCED_INTRINSIC_APOPTOTIC_SIGNALING_PATHWAY	2/201	10/17872	0.00533713604664747	0.0373724808149047	0.026837340881956	PMAIP1/PTPN2	2
GOBP_REGULATION_OF_CHRONIC_INFLAMMATORY_RESPONSE	GOBP_REGULATION_OF_CHRONIC_INFLAMMATORY_RESPONSE	GOBP_REGULATION_OF_CHRONIC_INFLAMMATORY_RESPONSE	2/201	10/17872	0.00533713604664747	0.0373724808149047	0.026837340881956	TNFAIP3/TNF	2
GOBP_REGULATION_OF_INTERLEUKIN_1_MEDIATED_SIGNALING_PATHWAY	GOBP_REGULATION_OF_INTERLEUKIN_1_MEDIATED_SIGNALING_PATHWAY	GOBP_REGULATION_OF_INTERLEUKIN_1_MEDIATED_SIGNALING_PATHWAY	2/201	10/17872	0.00533713604664747	0.0373724808149047	0.026837340881956	IL1R2/IL1RN	2
GOBP_REGULATION_OF_REMOVAL_OF_SUPEROXIDE_RADICALS	GOBP_REGULATION_OF_REMOVAL_OF_SUPEROXIDE_RADICALS	GOBP_REGULATION_OF_REMOVAL_OF_SUPEROXIDE_RADICALS	2/201	10/17872	0.00533713604664747	0.0373724808149047	0.026837340881956	GCH1/NFE2L2	2
GOBP_REGULATION_OF_TOLL_LIKE_RECEPTOR_3_SIGNALING_PATHWAY	GOBP_REGULATION_OF_TOLL_LIKE_RECEPTOR_3_SIGNALING_PATHWAY	GOBP_REGULATION_OF_TOLL_LIKE_RECEPTOR_3_SIGNALING_PATHWAY	2/201	10/17872	0.00533713604664747	0.0373724808149047	0.026837340881956	TNFAIP3/PELI1	2
GOBP_VITAMIN_D_BIOSYNTHETIC_PROCESS	GOBP_VITAMIN_D_BIOSYNTHETIC_PROCESS	GOBP_VITAMIN_D_BIOSYNTHETIC_PROCESS	2/201	10/17872	0.00533713604664747	0.0373724808149047	0.026837340881956	NFKB1/TNF	2
GOBP_APPENDAGE_MORPHOGENESIS	GOBP_APPENDAGE_MORPHOGENESIS	GOBP_APPENDAGE_MORPHOGENESIS	6/201	142/17872	0.00543010863487765	0.0374506100705928	0.0268934458399903	ALDH1A2/ZBTB16/MBNL1/FMN1/CHST11/ECE1	6
GOBP_KERATINOCYTE_DIFFERENTIATION	GOBP_KERATINOCYTE_DIFFERENTIATION	GOBP_KERATINOCYTE_DIFFERENTIATION	6/201	142/17872	0.00543010863487765	0.0374506100705928	0.0268934458399903	CLIC4/IL1A/ZFP36/EREG/SAV1/PRKCH	6
GOBP_REGULATION_OF_FAT_CELL_DIFFERENTIATION	GOBP_REGULATION_OF_FAT_CELL_DIFFERENTIATION	GOBP_REGULATION_OF_FAT_CELL_DIFFERENTIATION	6/201	142/17872	0.00543010863487765	0.0374506100705928	0.0268934458399903	SOD2/ZBTB16/ZFP36/TNF/PTGS2/SAV1	6
GOBP_PRODUCTION_OF_MOLECULAR_MEDIATOR_INVOLVED_IN_INFLAMMATORY_RESPONSE	GOBP_PRODUCTION_OF_MOLECULAR_MEDIATOR_INVOLVED_IN_INFLAMMATORY_RESPONSE	GOBP_PRODUCTION_OF_MOLECULAR_MEDIATOR_INVOLVED_IN_INFLAMMATORY_RESPONSE	5/201	100/17872	0.00543984186087412	0.0374506100705928	0.0268934458399903	IL1R2/TNF/STAT3/TLR4/MEFV	5
GOBP_POSITIVE_REGULATION_OF_MONOOXYGENASE_ACTIVITY	GOBP_POSITIVE_REGULATION_OF_MONOOXYGENASE_ACTIVITY	GOBP_POSITIVE_REGULATION_OF_MONOOXYGENASE_ACTIVITY	3/201	32/17872	0.00546745394564988	0.0374506100705928	0.0268934458399903	IL1B/GCH1/TNF	3
GOBP_POTASSIUM_ION_HOMEOSTASIS	GOBP_POTASSIUM_ION_HOMEOSTASIS	GOBP_POTASSIUM_ION_HOMEOSTASIS	3/201	32/17872	0.00546745394564988	0.0374506100705928	0.0268934458399903	ATP1A1/KCNJ2/KCNMA1	3
GOBP_PROSTANOID_BIOSYNTHETIC_PROCESS	GOBP_PROSTANOID_BIOSYNTHETIC_PROCESS	GOBP_PROSTANOID_BIOSYNTHETIC_PROCESS	3/201	32/17872	0.00546745394564988	0.0374506100705928	0.0268934458399903	IL1B/TBXAS1/PTGS2	3
GOBP_REGULATION_OF_ENDOPLASMIC_RETICULUM_STRESS_INDUCED_INTRINSIC_APOPTOTIC_SIGNALING_PATHWAY	GOBP_REGULATION_OF_ENDOPLASMIC_RETICULUM_STRESS_INDUCED_INTRINSIC_APOPTOTIC_SIGNALING_PATHWAY	GOBP_REGULATION_OF_ENDOPLASMIC_RETICULUM_STRESS_INDUCED_INTRINSIC_APOPTOTIC_SIGNALING_PATHWAY	3/201	32/17872	0.00546745394564988	0.0374506100705928	0.0268934458399903	PMAIP1/PTPN1/PTPN2	3
GOBP_REGULATION_OF_MACROPHAGE_DERIVED_FOAM_CELL_DIFFERENTIATION	GOBP_REGULATION_OF_MACROPHAGE_DERIVED_FOAM_CELL_DIFFERENTIATION	GOBP_REGULATION_OF_MACROPHAGE_DERIVED_FOAM_CELL_DIFFERENTIATION	3/201	32/17872	0.00546745394564988	0.0374506100705928	0.0268934458399903	NFKBIA/NFKB1/PRKCH	3
GOBP_NEGATIVE_REGULATION_OF_KINASE_ACTIVITY	GOBP_NEGATIVE_REGULATION_OF_KINASE_ACTIVITY	GOBP_NEGATIVE_REGULATION_OF_KINASE_ACTIVITY	8/201	237/17872	0.00547384042600686	0.0374506100705928	0.0268934458399903	IL1B/TNFAIP3/IRAK3/PTPN1/PTEN/DUSP1/GADD45B/PTPN2	8
GOBP_INTRINSIC_APOPTOTIC_SIGNALING_PATHWAY_IN_RESPONSE_TO_ENDOPLASMIC_RETICULUM_STRESS	GOBP_INTRINSIC_APOPTOTIC_SIGNALING_PATHWAY_IN_RESPONSE_TO_ENDOPLASMIC_RETICULUM_STRESS	GOBP_INTRINSIC_APOPTOTIC_SIGNALING_PATHWAY_IN_RESPONSE_TO_ENDOPLASMIC_RETICULUM_STRESS	4/201	63/17872	0.00551363172185726	0.0374650647523923	0.0269038258098058	PMAIP1/PTPN1/PPP1R15A/PTPN2	4
GOBP_RESPONSE_TO_FATTY_ACID	GOBP_RESPONSE_TO_FATTY_ACID	GOBP_RESPONSE_TO_FATTY_ACID	4/201	63/17872	0.00551363172185726	0.0374650647523923	0.0269038258098058	ACSL1/TBXAS1/LDLR/PTGS2	4
GOBP_VASCULAR_ENDOTHELIAL_GROWTH_FACTOR_PRODUCTION	GOBP_VASCULAR_ENDOTHELIAL_GROWTH_FACTOR_PRODUCTION	GOBP_VASCULAR_ENDOTHELIAL_GROWTH_FACTOR_PRODUCTION	4/201	63/17872	0.00551363172185726	0.0374650647523923	0.0269038258098058	IL1B/IL1A/TNF/PTGS2	4
GOBP_INTRINSIC_APOPTOTIC_SIGNALING_PATHWAY_IN_RESPONSE_TO_DNA_DAMAGE	GOBP_INTRINSIC_APOPTOTIC_SIGNALING_PATHWAY_IN_RESPONSE_TO_DNA_DAMAGE	GOBP_INTRINSIC_APOPTOTIC_SIGNALING_PATHWAY_IN_RESPONSE_TO_DNA_DAMAGE	5/201	101/17872	0.00567205496380115	0.03845395444777	0.027613951797453	SOD2/BCL2A1/CD44/HIPK2/TNF	5
GOBP_REGULATION_OF_B_CELL_PROLIFERATION	GOBP_REGULATION_OF_B_CELL_PROLIFERATION	GOBP_REGULATION_OF_B_CELL_PROLIFERATION	4/201	64/17872	0.00583039777584373	0.039259766513187	0.0281926089434287	PELI1/BCL6/GPR183/TLR4	4
GOBP_REGULATION_OF_OSTEOCLAST_DIFFERENTIATION	GOBP_REGULATION_OF_OSTEOCLAST_DIFFERENTIATION	GOBP_REGULATION_OF_OSTEOCLAST_DIFFERENTIATION	4/201	64/17872	0.00583039777584373	0.039259766513187	0.0281926089434287	TNF/CCL3/TNFAIP6/TLR4	4
GOBP_REGULATION_OF_VASOCONSTRICTION	GOBP_REGULATION_OF_VASOCONSTRICTION	GOBP_REGULATION_OF_VASOCONSTRICTION	4/201	64/17872	0.00583039777584373	0.039259766513187	0.0281926089434287	TBXAS1/ADM/PTGS2/ECE1	4
GOBP_NEGATIVE_REGULATION_OF_INTRINSIC_APOPTOTIC_SIGNALING_PATHWAY	GOBP_NEGATIVE_REGULATION_OF_INTRINSIC_APOPTOTIC_SIGNALING_PATHWAY	GOBP_NEGATIVE_REGULATION_OF_INTRINSIC_APOPTOTIC_SIGNALING_PATHWAY	5/201	102/17872	0.0059111771254593	0.0396293015596481	0.0284579736661728	SOD2/PTPN1/CD44/NFE2L2/PTGS2	5
GOBP_PROTEIN_DEPHOSPHORYLATION	GOBP_PROTEIN_DEPHOSPHORYLATION	GOBP_PROTEIN_DEPHOSPHORYLATION	9/201	292/17872	0.00591790451774507	0.0396293015596481	0.0284579736661728	PTPN1/PPP1R15A/PTEN/ENSA/DUSP1/TNF/PTPN2/DUSP6/PTPN12	9
GOBP_ADRENERGIC_RECEPTOR_SIGNALING_PATHWAY	GOBP_ADRENERGIC_RECEPTOR_SIGNALING_PATHWAY	GOBP_ADRENERGIC_RECEPTOR_SIGNALING_PATHWAY	3/201	33/17872	0.00596498706010124	0.0396293015596481	0.0284579736661728	PDE4B/RAPGEF2/AKAP13	3
GOBP_EMBRYONIC_DIGESTIVE_TRACT_DEVELOPMENT	GOBP_EMBRYONIC_DIGESTIVE_TRACT_DEVELOPMENT	GOBP_EMBRYONIC_DIGESTIVE_TRACT_DEVELOPMENT	3/201	33/17872	0.00596498706010124	0.0396293015596481	0.0284579736661728	ALDH1A2/TNF/CXCL8	3
GOBP_NEGATIVE_REGULATION_OF_SIGNAL_TRANSDUCTION_IN_ABSENCE_OF_LIGAND	GOBP_NEGATIVE_REGULATION_OF_SIGNAL_TRANSDUCTION_IN_ABSENCE_OF_LIGAND	GOBP_NEGATIVE_REGULATION_OF_SIGNAL_TRANSDUCTION_IN_ABSENCE_OF_LIGAND	3/201	33/17872	0.00596498706010124	0.0396293015596481	0.0284579736661728	IL1B/IL1A/TNF	3
GOBP_POSITIVE_REGULATION_OF_STEROID_METABOLIC_PROCESS	GOBP_POSITIVE_REGULATION_OF_STEROID_METABOLIC_PROCESS	GOBP_POSITIVE_REGULATION_OF_STEROID_METABOLIC_PROCESS	3/201	33/17872	0.00596498706010124	0.0396293015596481	0.0284579736661728	IL1A/TNF/ADM	3
GOBP_INTERLEUKIN_8_PRODUCTION	GOBP_INTERLEUKIN_8_PRODUCTION	GOBP_INTERLEUKIN_8_PRODUCTION	5/201	103/17872	0.00615731424754995	0.0405573812571198	0.0291244317300629	IL1B/TNF/STAT3/CD58/TLR4	5
GOBP_POSITIVE_REGULATION_OF_T_CELL_PROLIFERATION	GOBP_POSITIVE_REGULATION_OF_T_CELL_PROLIFERATION	GOBP_POSITIVE_REGULATION_OF_T_CELL_PROLIFERATION	5/201	103/17872	0.00615731424754995	0.0405573812571198	0.0291244317300629	IL1B/IL1A/SLAMF1/CD55/IL2RA	5
GOBP_HORMONE_BIOSYNTHETIC_PROCESS	GOBP_HORMONE_BIOSYNTHETIC_PROCESS	GOBP_HORMONE_BIOSYNTHETIC_PROCESS	4/201	65/17872	0.00615906594350495	0.0405573812571198	0.0291244317300629	NFKB1/ATP1A1/ADM/EGR1	4
GOBP_REGULATION_OF_EPIDERMIS_DEVELOPMENT	GOBP_REGULATION_OF_EPIDERMIS_DEVELOPMENT	GOBP_REGULATION_OF_EPIDERMIS_DEVELOPMENT	4/201	65/17872	0.00615906594350495	0.0405573812571198	0.0291244317300629	ZFP36/KLF7/MAFF/PRKCH	4
GOBP_MUSCLE_TISSUE_DEVELOPMENT	GOBP_MUSCLE_TISSUE_DEVELOPMENT	GOBP_MUSCLE_TISSUE_DEVELOPMENT	11/201	405/17872	0.00627067151098262	0.0412013504785488	0.0295868688264541	ALDH1A2/CFLAR/ZFAND5/PTEN/AKAP13/BTG2/MAFF/KDM6B/SAV1/PKP2/EGR1	11
GOBP_L_ASPARTATE_TRANSMEMBRANE_TRANSPORT	GOBP_L_ASPARTATE_TRANSMEMBRANE_TRANSPORT	GOBP_L_ASPARTATE_TRANSMEMBRANE_TRANSPORT	2/201	11/17872	0.00647508650751566	0.0416072513893841	0.0298783480344396	SLC1A3/SLC1A2	2
GOBP_NEGATIVE_REGULATION_OF_HORMONE_METABOLIC_PROCESS	GOBP_NEGATIVE_REGULATION_OF_HORMONE_METABOLIC_PROCESS	GOBP_NEGATIVE_REGULATION_OF_HORMONE_METABOLIC_PROCESS	2/201	11/17872	0.00647508650751566	0.0416072513893841	0.0298783480344396	NFKB1/ATP1A1	2
GOBP_NEGATIVE_REGULATION_OF_MYELINATION	GOBP_NEGATIVE_REGULATION_OF_MYELINATION	GOBP_NEGATIVE_REGULATION_OF_MYELINATION	2/201	11/17872	0.00647508650751566	0.0416072513893841	0.0298783480344396	PTEN/TNF	2
GOBP_PRESYNAPTIC_MEMBRANE_ORGANIZATION	GOBP_PRESYNAPTIC_MEMBRANE_ORGANIZATION	GOBP_PRESYNAPTIC_MEMBRANE_ORGANIZATION	2/201	11/17872	0.00647508650751566	0.0416072513893841	0.0298783480344396	PTEN/IL1RAPL1	2
GOBP_REGULATION_OF_T_HELPER_2_CELL_DIFFERENTIATION	GOBP_REGULATION_OF_T_HELPER_2_CELL_DIFFERENTIATION	GOBP_REGULATION_OF_T_HELPER_2_CELL_DIFFERENTIATION	2/201	11/17872	0.00647508650751566	0.0416072513893841	0.0298783480344396	NLRP3/BCL6	2
GOBP_NEGATIVE_REGULATION_OF_PROTEIN_DEPHOSPHORYLATION	GOBP_NEGATIVE_REGULATION_OF_PROTEIN_DEPHOSPHORYLATION	GOBP_NEGATIVE_REGULATION_OF_PROTEIN_DEPHOSPHORYLATION	3/201	34/17872	0.00648874055267948	0.0416072513893841	0.0298783480344396	PPP1R15A/ENSA/TNF	3
GOBP_POSITIVE_REGULATION_OF_CALCIUM_MEDIATED_SIGNALING	GOBP_POSITIVE_REGULATION_OF_CALCIUM_MEDIATED_SIGNALING	GOBP_POSITIVE_REGULATION_OF_CALCIUM_MEDIATED_SIGNALING	3/201	34/17872	0.00648874055267948	0.0416072513893841	0.0298783480344396	CCL4/TNF/CCL3	3
GOBP_POSITIVE_REGULATION_OF_INTERLEUKIN_2_PRODUCTION	GOBP_POSITIVE_REGULATION_OF_INTERLEUKIN_2_PRODUCTION	GOBP_POSITIVE_REGULATION_OF_INTERLEUKIN_2_PRODUCTION	3/201	34/17872	0.00648874055267948	0.0416072513893841	0.0298783480344396	IL1B/IL1A/PDE4B	3
GOBP_REGULATION_OF_SUPEROXIDE_METABOLIC_PROCESS	GOBP_REGULATION_OF_SUPEROXIDE_METABOLIC_PROCESS	GOBP_REGULATION_OF_SUPEROXIDE_METABOLIC_PROCESS	3/201	34/17872	0.00648874055267948	0.0416072513893841	0.0298783480344396	GCH1/FPR2/NFE2L2	3
GOBP_RESPONSE_TO_FLUID_SHEAR_STRESS	GOBP_RESPONSE_TO_FLUID_SHEAR_STRESS	GOBP_RESPONSE_TO_FLUID_SHEAR_STRESS	3/201	34/17872	0.00648874055267948	0.0416072513893841	0.0298783480344396	NFE2L2/PTGS2/MTSS1	3
GOBP_REGULATION_OF_CD4_POSITIVE_ALPHA_BETA_T_CELL_ACTIVATION	GOBP_REGULATION_OF_CD4_POSITIVE_ALPHA_BETA_T_CELL_ACTIVATION	GOBP_REGULATION_OF_CD4_POSITIVE_ALPHA_BETA_T_CELL_ACTIVATION	4/201	66/17872	0.00649982539304492	0.0416072513893841	0.0298783480344396	NLRP3/NFKBIZ/BCL6/CD55	4
GOBP_SIGNAL_TRANSDUCTION_IN_ABSENCE_OF_LIGAND	GOBP_SIGNAL_TRANSDUCTION_IN_ABSENCE_OF_LIGAND	GOBP_SIGNAL_TRANSDUCTION_IN_ABSENCE_OF_LIGAND	4/201	66/17872	0.00649982539304492	0.0416072513893841	0.0298783480344396	IL1B/BCL2A1/IL1A/TNF	4
GOBP_NEGATIVE_REGULATION_OF_TRANSPORT	GOBP_NEGATIVE_REGULATION_OF_TRANSPORT	GOBP_NEGATIVE_REGULATION_OF_TRANSPORT	12/201	466/17872	0.00662300843047904	0.0421847995222063	0.0302930878584575	IL1B/NFKB1/THBS1/PTEN/MCTP1/UBAC2/SESTD1/TNF/IL1RAPL1/PRKCE/PTGS2/KLF7	12
GOBP_POSITIVE_REGULATION_OF_CYTOSKELETON_ORGANIZATION	GOBP_POSITIVE_REGULATION_OF_CYTOSKELETON_ORGANIZATION	GOBP_POSITIVE_REGULATION_OF_CYTOSKELETON_ORGANIZATION	7/201	195/17872	0.00663346408296406	0.0421847995222063	0.0302930878584575	HCK/FMN1/PRKCE/SDC4/SNX9/PLEK/MTSS1	7
GOBP_POSITIVE_REGULATION_OF_PROTEIN_CONTAINING_COMPLEX_ASSEMBLY	GOBP_POSITIVE_REGULATION_OF_PROTEIN_CONTAINING_COMPLEX_ASSEMBLY	GOBP_POSITIVE_REGULATION_OF_PROTEIN_CONTAINING_COMPLEX_ASSEMBLY	7/201	195/17872	0.00663346408296406	0.0421847995222063	0.0302930878584575	HCK/FMN1/TNF/PRKCE/SNX9/PLEK/TLR4	7
GOBP_REGULATION_OF_PROTEIN_MODIFICATION_BY_SMALL_PROTEIN_CONJUGATION_OR_REMOVAL	GOBP_REGULATION_OF_PROTEIN_MODIFICATION_BY_SMALL_PROTEIN_CONJUGATION_OR_REMOVAL	GOBP_REGULATION_OF_PROTEIN_MODIFICATION_BY_SMALL_PROTEIN_CONJUGATION_OR_REMOVAL	8/201	245/17872	0.00664661608294903	0.0421847995222063	0.0302930878584575	TNFAIP3/PELI1/BIRC3/PTEN/N4BP1/PRKCE/TNIP1/EGR1	8
GOBP_REGULATION_OF_HEART_RATE	GOBP_REGULATION_OF_HEART_RATE	GOBP_REGULATION_OF_HEART_RATE	5/201	105/17872	0.00667105380887807	0.0422500074562278	0.030339913959251	GCH1/TNF/ADM/KCNJ2/PKP2	5
GOBP_NECROTIC_CELL_DEATH	GOBP_NECROTIC_CELL_DEATH	GOBP_NECROTIC_CELL_DEATH	4/201	67/17872	0.00685286190089108	0.0428555284074593	0.0307747411857296	PELI1/CFLAR/BIRC3/TNF	4
GOBP_NEGATIVE_REGULATION_OF_LEUKOCYTE_MEDIATED_IMMUNITY	GOBP_NEGATIVE_REGULATION_OF_LEUKOCYTE_MEDIATED_IMMUNITY	GOBP_NEGATIVE_REGULATION_OF_LEUKOCYTE_MEDIATED_IMMUNITY	4/201	67/17872	0.00685286190089108	0.0428555284074593	0.0307747411857296	SERPINB9/SLAMF1/BCL6/CD55	4
GOBP_POSITIVE_REGULATION_OF_FAT_CELL_DIFFERENTIATION	GOBP_POSITIVE_REGULATION_OF_FAT_CELL_DIFFERENTIATION	GOBP_POSITIVE_REGULATION_OF_FAT_CELL_DIFFERENTIATION	4/201	67/17872	0.00685286190089108	0.0428555284074593	0.0307747411857296	ZBTB16/ZFP36/PTGS2/SAV1	4
GOBP_POSITIVE_REGULATION_OF_NIK_NF_KAPPAB_SIGNALING	GOBP_POSITIVE_REGULATION_OF_NIK_NF_KAPPAB_SIGNALING	GOBP_POSITIVE_REGULATION_OF_NIK_NF_KAPPAB_SIGNALING	4/201	67/17872	0.00685286190089108	0.0428555284074593	0.0307747411857296	IL1B/TNF/NFAT5/TLR4	4
GOBP_REGULATION_OF_ALPHA_BETA_T_CELL_DIFFERENTIATION	GOBP_REGULATION_OF_ALPHA_BETA_T_CELL_DIFFERENTIATION	GOBP_REGULATION_OF_ALPHA_BETA_T_CELL_DIFFERENTIATION	4/201	67/17872	0.00685286190089108	0.0428555284074593	0.0307747411857296	NLRP3/ZBTB16/NFKBIZ/BCL6	4
GOBP_T_CELL_MIGRATION	GOBP_T_CELL_MIGRATION	GOBP_T_CELL_MIGRATION	4/201	67/17872	0.00685286190089108	0.0428555284074593	0.0307747411857296	GPR183/CCL20/ICAM1/CCL3	4
GOBP_POSITIVE_REGULATION_OF_CELL_CYCLE_PROCESS	GOBP_POSITIVE_REGULATION_OF_CELL_CYCLE_PROCESS	GOBP_POSITIVE_REGULATION_OF_CELL_CYCLE_PROCESS	8/201	247/17872	0.00696750576959568	0.0433905421935364	0.0311589369105092	IL1B/OOEP/IL1A/EREG/INSR/TNF/PRKCE/CCND3	8
GOBP_RESPONSE_TO_TOXIC_SUBSTANCE	GOBP_RESPONSE_TO_TOXIC_SUBSTANCE	GOBP_RESPONSE_TO_TOXIC_SUBSTANCE	8/201	247/17872	0.00696750576959568	0.0433905421935364	0.0311589369105092	SOD2/CCL4/GCH1/TNF/CCL3/NFE2L2/PTGS2/MT2A	8
GOBP_NEGATIVE_REGULATION_OF_B_CELL_ACTIVATION	GOBP_NEGATIVE_REGULATION_OF_B_CELL_ACTIVATION	GOBP_NEGATIVE_REGULATION_OF_B_CELL_ACTIVATION	3/201	35/17872	0.00703905167694496	0.0435508722835464	0.0312740706448884	TNFAIP3/SAMSN1/BCL6	3
GOBP_POSITIVE_REGULATION_OF_PROTEIN_CONTAINING_COMPLEX_DISASSEMBLY	GOBP_POSITIVE_REGULATION_OF_PROTEIN_CONTAINING_COMPLEX_DISASSEMBLY	GOBP_POSITIVE_REGULATION_OF_PROTEIN_CONTAINING_COMPLEX_DISASSEMBLY	3/201	35/17872	0.00703905167694496	0.0435508722835464	0.0312740706448884	INSR/TNF/PLEK	3
GOBP_REGULATION_OF_FIBROBLAST_MIGRATION	GOBP_REGULATION_OF_FIBROBLAST_MIGRATION	GOBP_REGULATION_OF_FIBROBLAST_MIGRATION	3/201	35/17872	0.00703905167694496	0.0435508722835464	0.0312740706448884	THBS1/PRKCE/SDC4	3
GOBP_REGULATION_OF_CELLULAR_CARBOHYDRATE_METABOLIC_PROCESS	GOBP_REGULATION_OF_CELLULAR_CARBOHYDRATE_METABOLIC_PROCESS	GOBP_REGULATION_OF_CELLULAR_CARBOHYDRATE_METABOLIC_PROCESS	6/201	150/17872	0.00705164978644081	0.0435508722835464	0.0312740706448884	PMAIP1/INSR/PTPN2/PRKCE/STAT3/PLEK	6
GOBP_NEGATIVE_REGULATION_OF_T_CELL_PROLIFERATION	GOBP_NEGATIVE_REGULATION_OF_T_CELL_PROLIFERATION	GOBP_NEGATIVE_REGULATION_OF_T_CELL_PROLIFERATION	4/201	68/17872	0.00721835779181043	0.0443966212226196	0.0318814066333895	PELI1/SCGB1A1/SDC4/IL2RA	4
GOBP_REGULATION_OF_CELL_SUBSTRATE_JUNCTION_ORGANIZATION	GOBP_REGULATION_OF_CELL_SUBSTRATE_JUNCTION_ORGANIZATION	GOBP_REGULATION_OF_CELL_SUBSTRATE_JUNCTION_ORGANIZATION	4/201	68/17872	0.00721835779181043	0.0443966212226196	0.0318814066333895	THBS1/FMN1/PTEN/SDC4	4
GOBP_LYMPHOCYTE_MEDIATED_IMMUNITY	GOBP_LYMPHOCYTE_MEDIATED_IMMUNITY	GOBP_LYMPHOCYTE_MEDIATED_IMMUNITY	10/201	357/17872	0.00731821665224188	0.0449181898634517	0.0322559473409405	NLRP3/IL1B/SERPINB9/RNF19B/SLAMF1/BCL6/CD55/ICAM1/TNF/HLA-DQA2	10
GOBP_POSITIVE_REGULATION_OF_IMMUNE_EFFECTOR_PROCESS	GOBP_POSITIVE_REGULATION_OF_IMMUNE_EFFECTOR_PROCESS	GOBP_POSITIVE_REGULATION_OF_IMMUNE_EFFECTOR_PROCESS	8/201	250/17872	0.00747064875341716	0.0457596411323273	0.0328601971537964	NLRP3/IL1B/NFKBIZ/SLAMF1/ADGRE2/CD55/TNF/TLR4	8
GOBP_ACTIN_CYTOSKELETON_REORGANIZATION	GOBP_ACTIN_CYTOSKELETON_REORGANIZATION	GOBP_ACTIN_CYTOSKELETON_REORGANIZATION	5/201	108/17872	0.00749688499671413	0.0458262457893407	0.0329080262474402	SIPA1L1/HCK/PTPN1/PLEK/ABL2	5
GOBP_NEGATIVE_REGULATION_OF_CHEMOTAXIS	GOBP_NEGATIVE_REGULATION_OF_CHEMOTAXIS	GOBP_NEGATIVE_REGULATION_OF_CHEMOTAXIS	4/201	69/17872	0.00759649188293632	0.0461513956961284	0.0331415178085012	THBS1/DUSP1/PTPN2/TNFAIP6	4
GOBP_POSITIVE_REGULATION_OF_ALPHA_BETA_T_CELL_ACTIVATION	GOBP_POSITIVE_REGULATION_OF_ALPHA_BETA_T_CELL_ACTIVATION	GOBP_POSITIVE_REGULATION_OF_ALPHA_BETA_T_CELL_ACTIVATION	4/201	69/17872	0.00759649188293632	0.0461513956961284	0.0331415178085012	NLRP3/ZBTB16/NFKBIZ/CD55	4
GOBP_REGULATION_OF_INSULIN_RECEPTOR_SIGNALING_PATHWAY	GOBP_REGULATION_OF_INSULIN_RECEPTOR_SIGNALING_PATHWAY	GOBP_REGULATION_OF_INSULIN_RECEPTOR_SIGNALING_PATHWAY	4/201	69/17872	0.00759649188293632	0.0461513956961284	0.0331415178085012	IL1B/PTPN1/PTPN2/CCND3	4
GOBP_NEGATIVE_REGULATION_OF_ENDOTHELIAL_CELL_APOPTOTIC_PROCESS	GOBP_NEGATIVE_REGULATION_OF_ENDOTHELIAL_CELL_APOPTOTIC_PROCESS	GOBP_NEGATIVE_REGULATION_OF_ENDOTHELIAL_CELL_APOPTOTIC_PROCESS	3/201	36/17872	0.00761623602346361	0.0461773009308779	0.0331601204701507	TNFAIP3/ICAM1/NFE2L2	3
GOBP_REGULATION_OF_CALCIUM_ION_TRANSPORT	GOBP_REGULATION_OF_CALCIUM_ION_TRANSPORT	GOBP_REGULATION_OF_CALCIUM_ION_TRANSPORT	8/201	251/17872	0.00764430684816054	0.0462534834240627	0.0332148274495713	CCL4/PDE4B/SESTD1/CCL3/PRKCE/PTGS2/LILRA5/VMP1	8
GOBP_GLOMERULAR_MESANGIAL_CELL_PROLIFERATION	GOBP_GLOMERULAR_MESANGIAL_CELL_PROLIFERATION	GOBP_GLOMERULAR_MESANGIAL_CELL_PROLIFERATION	2/201	12/17872	0.0077128855749721	0.0463725200961547	0.0333003082010956	CFLAR/EGR1	2
GOBP_NEGATIVE_REGULATION_OF_PLATELET_DERIVED_GROWTH_FACTOR_RECEPTOR_SIGNALING_PATHWAY	GOBP_NEGATIVE_REGULATION_OF_PLATELET_DERIVED_GROWTH_FACTOR_RECEPTOR_SIGNALING_PATHWAY	GOBP_NEGATIVE_REGULATION_OF_PLATELET_DERIVED_GROWTH_FACTOR_RECEPTOR_SIGNALING_PATHWAY	2/201	12/17872	0.0077128855749721	0.0463725200961547	0.0333003082010956	PTPN2/PTPN12	2
GOBP_REGULATION_OF_VITAMIN_METABOLIC_PROCESS	GOBP_REGULATION_OF_VITAMIN_METABOLIC_PROCESS	GOBP_REGULATION_OF_VITAMIN_METABOLIC_PROCESS	2/201	12/17872	0.0077128855749721	0.0463725200961547	0.0333003082010956	NFKB1/TNF	2
GOBP_ORGANIC_ACID_TRANSMEMBRANE_TRANSPORT	GOBP_ORGANIC_ACID_TRANSMEMBRANE_TRANSPORT	GOBP_ORGANIC_ACID_TRANSMEMBRANE_TRANSPORT	6/201	153/17872	0.00774170801471171	0.0463725200961547	0.0333003082010956	ACSL1/THBS1/AQP9/SLC1A3/TNF/SLC1A2	6
GOBP_REGULATION_OF_LIPID_TRANSPORT	GOBP_REGULATION_OF_LIPID_TRANSPORT	GOBP_REGULATION_OF_LIPID_TRANSPORT	6/201	153/17872	0.00774170801471171	0.0463725200961547	0.0333003082010956	IL1B/NFKBIA/NFKB1/ACSL1/IL1A/THBS1	6
GOBP_LYMPHOCYTE_ACTIVATION_INVOLVED_IN_IMMUNE_RESPONSE	GOBP_LYMPHOCYTE_ACTIVATION_INVOLVED_IN_IMMUNE_RESPONSE	GOBP_LYMPHOCYTE_ACTIVATION_INVOLVED_IN_IMMUNE_RESPONSE	7/201	202/17872	0.00798607268006028	0.0476530636488863	0.0342198720911423	NLRP3/NFKBIZ/BCL6/GPR183/ICAM1/STAT3/TLR4	7
GOBP_POSITIVE_REGULATION_OF_CHEMOKINE_PRODUCTION	GOBP_POSITIVE_REGULATION_OF_CHEMOKINE_PRODUCTION	GOBP_POSITIVE_REGULATION_OF_CHEMOKINE_PRODUCTION	4/201	70/17872	0.00798743943159342	0.0476530636488863	0.0342198720911423	IL1B/TNF/TLR4/EGR1	4
GOBP_POSITIVE_REGULATION_OF_UBIQUITIN_DEPENDENT_PROTEIN_CATABOLIC_PROCESS	GOBP_POSITIVE_REGULATION_OF_UBIQUITIN_DEPENDENT_PROTEIN_CATABOLIC_PROCESS	GOBP_POSITIVE_REGULATION_OF_UBIQUITIN_DEPENDENT_PROTEIN_CATABOLIC_PROCESS	5/201	110/17872	0.00808544843422538	0.0481415023538809	0.0345706220477963	RNF144B/RNF19B/PTEN/PLK3/NFE2L2	5
GOBP_REGULATION_OF_GTPASE_ACTIVITY	GOBP_REGULATION_OF_GTPASE_ACTIVITY	GOBP_REGULATION_OF_GTPASE_ACTIVITY	10/201	363/17872	0.00818053814328892	0.0483668919838047	0.0347324753205154	RASAL2/CCL4/SIPA1L1/RASGEF1B/BCL6/RAPGEF2/CCL20/CCL3/SNX9/FGD4	10
GOBP_CELLULAR_RESPONSE_TO_STEROID_HORMONE_STIMULUS	GOBP_CELLULAR_RESPONSE_TO_STEROID_HORMONE_STIMULUS	GOBP_CELLULAR_RESPONSE_TO_STEROID_HORMONE_STIMULUS	7/201	203/17872	0.00819475223341919	0.0483668919838047	0.0347324753205154	CFLAR/ZFP36/ATP1A1/RBFOX2/KLF9/MT-ND3/EIF4E	7
GOBP_POSITIVE_REGULATION_OF_GLUCOSE_IMPORT	GOBP_POSITIVE_REGULATION_OF_GLUCOSE_IMPORT	GOBP_POSITIVE_REGULATION_OF_GLUCOSE_IMPORT	3/201	37/17872	0.00822058807770332	0.0483668919838047	0.0347324753205154	INSR/NFE2L2/SLC1A2	3
GOBP_POSITIVE_REGULATION_OF_LYMPHOCYTE_MIGRATION	GOBP_POSITIVE_REGULATION_OF_LYMPHOCYTE_MIGRATION	GOBP_POSITIVE_REGULATION_OF_LYMPHOCYTE_MIGRATION	3/201	37/17872	0.00822058807770332	0.0483668919838047	0.0347324753205154	CCL4/CCL20/CCL3	3
GOBP_REGULATION_OF_KERATINOCYTE_PROLIFERATION	GOBP_REGULATION_OF_KERATINOCYTE_PROLIFERATION	GOBP_REGULATION_OF_KERATINOCYTE_PROLIFERATION	3/201	37/17872	0.00822058807770332	0.0483668919838047	0.0347324753205154	ZFP36/AREG/KLF9	3
GOBP_RESPIRATORY_BURST	GOBP_RESPIRATORY_BURST	GOBP_RESPIRATORY_BURST	3/201	37/17872	0.00822058807770332	0.0483668919838047	0.0347324753205154	HCK/INSR/CD55	3
GOBP_CELL_JUNCTION_ASSEMBLY	GOBP_CELL_JUNCTION_ASSEMBLY	GOBP_CELL_JUNCTION_ASSEMBLY	11/201	421/17872	0.00827573797641928	0.0485955243772809	0.0348966572358335	IL1B/THBS1/FMN1/PTEN/RAPGEF2/TNF/IL1RAPL1/SDC4/VMP1/PKP2/PRKCH	11
GOBP_REGULATION_OF_PHOSPHATIDYLINOSITOL_3_KINASE_SIGNALING	GOBP_REGULATION_OF_PHOSPHATIDYLINOSITOL_3_KINASE_SIGNALING	GOBP_REGULATION_OF_PHOSPHATIDYLINOSITOL_3_KINASE_SIGNALING	5/201	111/17872	0.00839143533358783	0.0491780974461542	0.0353150054882664	PTEN/INSR/TNF/PIK3AP1/FLT1	5
GOBP_CELLULAR_RESPONSE_TO_EXTERNAL_STIMULUS	GOBP_CELLULAR_RESPONSE_TO_EXTERNAL_STIMULUS	GOBP_CELLULAR_RESPONSE_TO_EXTERNAL_STIMULUS	9/201	309/17872	0.00843715345117597	0.0493490759703097	0.0354377859094801	IL1B/NFKB1/PMAIP1/NFE2L2/PTGS2/KCNJ2/IRF1/SLC1A2/TLR4	9
GOBP_CARBOHYDRATE_TRANSPORT	GOBP_CARBOHYDRATE_TRANSPORT	GOBP_CARBOHYDRATE_TRANSPORT	6/201	156/17872	0.0084791965630965	0.0494979321873128	0.0355446802057913	IL1B/AQP9/INSR/TNF/NFE2L2/SLC1A2	6
GOBP_T_CELL_MEDIATED_IMMUNITY	GOBP_T_CELL_MEDIATED_IMMUNITY	GOBP_T_CELL_MEDIATED_IMMUNITY	5/201	112/17872	0.00870535807173586	0.0507189123593517	0.0364214713733192	NLRP3/IL1B/SLAMF1/CD55/ICAM1	5
GOBP_DNA_DAMAGE_RESPONSE_SIGNAL_TRANSDUCTION_BY_P53_CLASS_MEDIATOR	GOBP_DNA_DAMAGE_RESPONSE_SIGNAL_TRANSDUCTION_BY_P53_CLASS_MEDIATOR	GOBP_DNA_DAMAGE_RESPONSE_SIGNAL_TRANSDUCTION_BY_P53_CLASS_MEDIATOR	4/201	72/17872	0.00880845784441263	0.0510767017618464	0.0366784014980883	PMAIP1/CD44/HIPK2/PLK3	4
GOBP_SUPEROXIDE_METABOLIC_PROCESS	GOBP_SUPEROXIDE_METABOLIC_PROCESS	GOBP_SUPEROXIDE_METABOLIC_PROCESS	4/201	72/17872	0.00880845784441263	0.0510767017618464	0.0366784014980883	SOD2/GCH1/FPR2/NFE2L2	4
GOBP_FORELIMB_MORPHOGENESIS	GOBP_FORELIMB_MORPHOGENESIS	GOBP_FORELIMB_MORPHOGENESIS	3/201	38/17872	0.00885238176697104	0.0510767017618464	0.0366784014980883	ALDH1A2/ZBTB16/FMN1	3
GOBP_MACROPHAGE_CHEMOTAXIS	GOBP_MACROPHAGE_CHEMOTAXIS	GOBP_MACROPHAGE_CHEMOTAXIS	3/201	38/17872	0.00885238176697104	0.0510767017618464	0.0366784014980883	THBS1/SLAMF1/CCL3	3
GOBP_REGULATION_OF_T_HELPER_CELL_DIFFERENTIATION	GOBP_REGULATION_OF_T_HELPER_CELL_DIFFERENTIATION	GOBP_REGULATION_OF_T_HELPER_CELL_DIFFERENTIATION	3/201	38/17872	0.00885238176697104	0.0510767017618464	0.0366784014980883	NLRP3/NFKBIZ/BCL6	3
GOBP_HEART_PROCESS	GOBP_HEART_PROCESS	GOBP_HEART_PROCESS	8/201	258/17872	0.00894642439055572	0.0511187117049927	0.0367085690208233	GCH1/PDE4B/ATP1A1/TNF/ADM/AKAP13/KCNJ2/PKP2	8
GOBP_RESPONSE_TO_TOPOLOGICALLY_INCORRECT_PROTEIN	GOBP_RESPONSE_TO_TOPOLOGICALLY_INCORRECT_PROTEIN	GOBP_RESPONSE_TO_TOPOLOGICALLY_INCORRECT_PROTEIN	6/201	158/17872	0.00899805679641382	0.0511187117049927	0.0367085690208233	PTPN1/THBS1/PPP1R15A/PTPN2/ATF6/NFE2L2	6
GOBP_ACUTE_INFLAMMATORY_RESPONSE	GOBP_ACUTE_INFLAMMATORY_RESPONSE	GOBP_ACUTE_INFLAMMATORY_RESPONSE	5/201	113/17872	0.0090273148018812	0.0511187117049927	0.0367085690208233	NLRP3/IL1B/IL1A/TNF/PTGS2	5
GOBP_CELLULAR_RESPONSE_TO_ETHANOL	GOBP_CELLULAR_RESPONSE_TO_ETHANOL	GOBP_CELLULAR_RESPONSE_TO_ETHANOL	2/201	13/17872	0.00904816620188943	0.0511187117049927	0.0367085690208233	SOD2/PRKCE	2
GOBP_COMPLEMENT_RECEPTOR_MEDIATED_SIGNALING_PATHWAY	GOBP_COMPLEMENT_RECEPTOR_MEDIATED_SIGNALING_PATHWAY	GOBP_COMPLEMENT_RECEPTOR_MEDIATED_SIGNALING_PATHWAY	2/201	13/17872	0.00904816620188943	0.0511187117049927	0.0367085690208233	FPR2/FPR1	2
GOBP_FAT_SOLUBLE_VITAMIN_BIOSYNTHETIC_PROCESS	GOBP_FAT_SOLUBLE_VITAMIN_BIOSYNTHETIC_PROCESS	GOBP_FAT_SOLUBLE_VITAMIN_BIOSYNTHETIC_PROCESS	2/201	13/17872	0.00904816620188943	0.0511187117049927	0.0367085690208233	NFKB1/TNF	2
GOBP_HEPATOCYTE_GROWTH_FACTOR_RECEPTOR_SIGNALING_PATHWAY	GOBP_HEPATOCYTE_GROWTH_FACTOR_RECEPTOR_SIGNALING_PATHWAY	GOBP_HEPATOCYTE_GROWTH_FACTOR_RECEPTOR_SIGNALING_PATHWAY	2/201	13/17872	0.00904816620188943	0.0511187117049927	0.0367085690208233	PTPN1/PTPN2	2
GOBP_LEUKOCYTE_AGGREGATION	GOBP_LEUKOCYTE_AGGREGATION	GOBP_LEUKOCYTE_AGGREGATION	2/201	13/17872	0.00904816620188943	0.0511187117049927	0.0367085690208233	IL1B/CD44	2
GOBP_POSITIVE_REGULATION_OF_EPIDERMAL_GROWTH_FACTOR_ACTIVATED_RECEPTOR_ACTIVITY	GOBP_POSITIVE_REGULATION_OF_EPIDERMAL_GROWTH_FACTOR_ACTIVATED_RECEPTOR_ACTIVITY	GOBP_POSITIVE_REGULATION_OF_EPIDERMAL_GROWTH_FACTOR_ACTIVATED_RECEPTOR_ACTIVITY	2/201	13/17872	0.00904816620188943	0.0511187117049927	0.0367085690208233	AREG/EREG	2
GOBP_PROGRAMMED_CELL_DEATH_INVOLVED_IN_CELL_DEVELOPMENT	GOBP_PROGRAMMED_CELL_DEATH_INVOLVED_IN_CELL_DEVELOPMENT	GOBP_PROGRAMMED_CELL_DEATH_INVOLVED_IN_CELL_DEVELOPMENT	2/201	13/17872	0.00904816620188943	0.0511187117049927	0.0367085690208233	IL1B/IL1A	2
GOBP_RESPONSE_TO_MACROPHAGE_COLONY_STIMULATING_FACTOR	GOBP_RESPONSE_TO_MACROPHAGE_COLONY_STIMULATING_FACTOR	GOBP_RESPONSE_TO_MACROPHAGE_COLONY_STIMULATING_FACTOR	2/201	13/17872	0.00904816620188943	0.0511187117049927	0.0367085690208233	PTPN2/TLR4	2
GOBP_CELLULAR_RESPONSE_TO_INSULIN_STIMULUS	GOBP_CELLULAR_RESPONSE_TO_INSULIN_STIMULUS	GOBP_CELLULAR_RESPONSE_TO_INSULIN_STIMULUS	7/201	207/17872	0.00906985695651064	0.0511443918738587	0.0367270100616837	IL1B/CFLAR/PTPN1/INSR/PTPN2/NAMPT/CCND3	7
GOBP_PRODUCTION_OF_MOLECULAR_MEDIATOR_OF_IMMUNE_RESPONSE	GOBP_PRODUCTION_OF_MOLECULAR_MEDIATOR_OF_IMMUNE_RESPONSE	GOBP_PRODUCTION_OF_MOLECULAR_MEDIATOR_OF_IMMUNE_RESPONSE	9/201	313/17872	0.00913356470768883	0.051406459477426	0.0369152019466669	NLRP3/IL1B/IRAK3/SLAMF1/BCL6/CD55/TNF/HLA-DQA2/TLR4	9
GOBP_NEGATIVE_REGULATION_OF_INNATE_IMMUNE_RESPONSE	GOBP_NEGATIVE_REGULATION_OF_INNATE_IMMUNE_RESPONSE	GOBP_NEGATIVE_REGULATION_OF_INNATE_IMMUNE_RESPONSE	4/201	73/17872	0.00923886100558928	0.0519011720897793	0.0372704572234596	TNFAIP3/IRAK3/SERPINB9/PTPN2	4
GOBP_EPITHELIAL_CELL_DEVELOPMENT	GOBP_EPITHELIAL_CELL_DEVELOPMENT	GOBP_EPITHELIAL_CELL_DEVELOPMENT	7/201	208/17872	0.00929894916769346	0.0521405364045669	0.0374423457781088	IL1B/CLIC4/IL1A/RAPGEF2/ICAM1/TNF/RILPL2	7
GOBP_NEGATIVE_REGULATION_OF_PEPTIDASE_ACTIVITY	GOBP_NEGATIVE_REGULATION_OF_PEPTIDASE_ACTIVITY	GOBP_NEGATIVE_REGULATION_OF_PEPTIDASE_ACTIVITY	8/201	260/17872	0.00934722993035869	0.0523129209798499	0.0375661358907474	SERPINB9/BIRC3/CD44/THBS1/TNFAIP8/TNF/PTGS2/CTSB	8
GOBP_AMYLOID_BETA_CLEARANCE	GOBP_AMYLOID_BETA_CLEARANCE	GOBP_AMYLOID_BETA_CLEARANCE	3/201	39/17872	0.00951187099657799	0.0529364014604331	0.0380138599332997	INSR/LDLR/TNF	3
GOBP_FOAM_CELL_DIFFERENTIATION	GOBP_FOAM_CELL_DIFFERENTIATION	GOBP_FOAM_CELL_DIFFERENTIATION	3/201	39/17872	0.00951187099657799	0.0529364014604331	0.0380138599332997	NFKBIA/NFKB1/PRKCH	3
GOBP_POSITIVE_REGULATION_OF_CD4_POSITIVE_ALPHA_BETA_T_CELL_ACTIVATION	GOBP_POSITIVE_REGULATION_OF_CD4_POSITIVE_ALPHA_BETA_T_CELL_ACTIVATION	GOBP_POSITIVE_REGULATION_OF_CD4_POSITIVE_ALPHA_BETA_T_CELL_ACTIVATION	3/201	39/17872	0.00951187099657799	0.0529364014604331	0.0380138599332997	NLRP3/NFKBIZ/CD55	3
GOBP_MULTICELLULAR_ORGANISMAL_RESPONSE_TO_STRESS	GOBP_MULTICELLULAR_ORGANISMAL_RESPONSE_TO_STRESS	GOBP_MULTICELLULAR_ORGANISMAL_RESPONSE_TO_STRESS	4/201	74/17872	0.00968274213883215	0.0537589723423939	0.0386045516582641	GCH1/THBS1/PTEN/EIF4E	4
GOBP_NEGATIVE_REGULATION_OF_CELLULAR_RESPONSE_TO_GROWTH_FACTOR_STIMULUS	GOBP_NEGATIVE_REGULATION_OF_CELLULAR_RESPONSE_TO_GROWTH_FACTOR_STIMULUS	GOBP_NEGATIVE_REGULATION_OF_CELLULAR_RESPONSE_TO_GROWTH_FACTOR_STIMULUS	5/201	115/17872	0.00969571810935566	0.0537589723423939	0.0386045516582641	CFLAR/PTPN1/THBS1/HIPK2/TNFAIP6	5
GOBP_CELLULAR_RESPONSE_TO_TOPOLOGICALLY_INCORRECT_PROTEIN	GOBP_CELLULAR_RESPONSE_TO_TOPOLOGICALLY_INCORRECT_PROTEIN	GOBP_CELLULAR_RESPONSE_TO_TOPOLOGICALLY_INCORRECT_PROTEIN	5/201	116/17872	0.0100423561687666	0.0555776409117452	0.0399105454612635	PTPN1/PPP1R15A/PTPN2/ATF6/NFE2L2	5
GOBP_CARDIAC_MUSCLE_CELL_CONTRACTION	GOBP_CARDIAC_MUSCLE_CELL_CONTRACTION	GOBP_CARDIAC_MUSCLE_CELL_CONTRACTION	4/201	75/17872	0.0101402580451449	0.0557224955920668	0.0400145662366943	PDE4B/ATP1A1/KCNJ2/PKP2	4
GOBP_INFLAMMATORY_RESPONSE_TO_ANTIGENIC_STIMULUS	GOBP_INFLAMMATORY_RESPONSE_TO_ANTIGENIC_STIMULUS	GOBP_INFLAMMATORY_RESPONSE_TO_ANTIGENIC_STIMULUS	4/201	75/17872	0.0101402580451449	0.0557224955920668	0.0400145662366943	HCK/IL1RN/TNF/IL2RA	4
GOBP_NEGATIVE_REGULATION_OF_CELL_MATRIX_ADHESION	GOBP_NEGATIVE_REGULATION_OF_CELL_MATRIX_ADHESION	GOBP_NEGATIVE_REGULATION_OF_CELL_MATRIX_ADHESION	3/201	40/17872	0.0101992901754169	0.0557224955920668	0.0400145662366943	THBS1/PTEN/BCL6	3
GOBP_NEGATIVE_REGULATION_OF_CELLULAR_RESPONSE_TO_INSULIN_STIMULUS	GOBP_NEGATIVE_REGULATION_OF_CELLULAR_RESPONSE_TO_INSULIN_STIMULUS	GOBP_NEGATIVE_REGULATION_OF_CELLULAR_RESPONSE_TO_INSULIN_STIMULUS	3/201	40/17872	0.0101992901754169	0.0557224955920668	0.0400145662366943	IL1B/PTPN1/PTPN2	3
GOBP_POSITIVE_REGULATION_OF_BLOOD_CIRCULATION	GOBP_POSITIVE_REGULATION_OF_BLOOD_CIRCULATION	GOBP_POSITIVE_REGULATION_OF_BLOOD_CIRCULATION	3/201	40/17872	0.0101992901754169	0.0557224955920668	0.0400145662366943	GCH1/ATP1A1/ADM	3
GOBP_REGULATION_OF_ACTIN_FILAMENT_BASED_MOVEMENT	GOBP_REGULATION_OF_ACTIN_FILAMENT_BASED_MOVEMENT	GOBP_REGULATION_OF_ACTIN_FILAMENT_BASED_MOVEMENT	3/201	40/17872	0.0101992901754169	0.0557224955920668	0.0400145662366943	PDE4B/KCNJ2/PKP2	3
GOBP_TRIGLYCERIDE_BIOSYNTHETIC_PROCESS	GOBP_TRIGLYCERIDE_BIOSYNTHETIC_PROCESS	GOBP_TRIGLYCERIDE_BIOSYNTHETIC_PROCESS	3/201	40/17872	0.0101992901754169	0.0557224955920668	0.0400145662366943	ACSL1/LDLR/GK	3
GOBP_REGULATION_OF_HEART_CONTRACTION	GOBP_REGULATION_OF_HEART_CONTRACTION	GOBP_REGULATION_OF_HEART_CONTRACTION	7/201	212/17872	0.010257892626331	0.0559402078690044	0.0401709063688706	GCH1/PDE4B/ATP1A1/TNF/ADM/KCNJ2/PKP2	7
GOBP_POSITIVE_REGULATION_OF_LYMPHOCYTE_MEDIATED_IMMUNITY	GOBP_POSITIVE_REGULATION_OF_LYMPHOCYTE_MEDIATED_IMMUNITY	GOBP_POSITIVE_REGULATION_OF_LYMPHOCYTE_MEDIATED_IMMUNITY	5/201	117/17872	0.0103974111308205	0.0562188277932862	0.0403709845472899	NLRP3/IL1B/SLAMF1/CD55/TNF	5
GOBP_REGULATION_OF_MYELOID_LEUKOCYTE_DIFFERENTIATION	GOBP_REGULATION_OF_MYELOID_LEUKOCYTE_DIFFERENTIATION	GOBP_REGULATION_OF_MYELOID_LEUKOCYTE_DIFFERENTIATION	5/201	117/17872	0.0103974111308205	0.0562188277932862	0.0403709845472899	TNF/CCL3/PTPN2/TNFAIP6/TLR4	5
GOBP_GERMINAL_CENTER_FORMATION	GOBP_GERMINAL_CENTER_FORMATION	GOBP_GERMINAL_CENTER_FORMATION	2/201	14/17872	0.010478601492815	0.0562188277932862	0.0403709845472899	TNFAIP3/BCL6	2
GOBP_HYALURONAN_BIOSYNTHETIC_PROCESS	GOBP_HYALURONAN_BIOSYNTHETIC_PROCESS	GOBP_HYALURONAN_BIOSYNTHETIC_PROCESS	2/201	14/17872	0.010478601492815	0.0562188277932862	0.0403709845472899	IL1B/NFKB1	2
GOBP_NEGATIVE_REGULATION_BY_HOST_OF_VIRAL_TRANSCRIPTION	GOBP_NEGATIVE_REGULATION_BY_HOST_OF_VIRAL_TRANSCRIPTION	GOBP_NEGATIVE_REGULATION_BY_HOST_OF_VIRAL_TRANSCRIPTION	2/201	14/17872	0.010478601492815	0.0562188277932862	0.0403709845472899	CCL4/CCL3	2
GOBP_POSITIVE_REGULATION_OF_HORMONE_METABOLIC_PROCESS	GOBP_POSITIVE_REGULATION_OF_HORMONE_METABOLIC_PROCESS	GOBP_POSITIVE_REGULATION_OF_HORMONE_METABOLIC_PROCESS	2/201	14/17872	0.010478601492815	0.0562188277932862	0.0403709845472899	ADM/EGR1	2
GOBP_REGULATION_OF_PROSTAGLANDIN_SECRETION	GOBP_REGULATION_OF_PROSTAGLANDIN_SECRETION	GOBP_REGULATION_OF_PROSTAGLANDIN_SECRETION	2/201	14/17872	0.010478601492815	0.0562188277932862	0.0403709845472899	IL1B/IL1A	2
GOBP_REGULATION_OF_VASCULAR_WOUND_HEALING	GOBP_REGULATION_OF_VASCULAR_WOUND_HEALING	GOBP_REGULATION_OF_VASCULAR_WOUND_HEALING	2/201	14/17872	0.010478601492815	0.0562188277932862	0.0403709845472899	TNFAIP3/TNF	2
GOBP_SYNAPTIC_VESICLE_CLUSTERING	GOBP_SYNAPTIC_VESICLE_CLUSTERING	GOBP_SYNAPTIC_VESICLE_CLUSTERING	2/201	14/17872	0.010478601492815	0.0562188277932862	0.0403709845472899	PTEN/SYN1	2
GOBP_POSITIVE_REGULATION_OF_TRANSMEMBRANE_TRANSPORT	GOBP_POSITIVE_REGULATION_OF_TRANSMEMBRANE_TRANSPORT	GOBP_POSITIVE_REGULATION_OF_TRANSMEMBRANE_TRANSPORT	7/201	213/17872	0.0105084893644939	0.05627796009746	0.0404134477118871	ACSL1/INSR/IFNGR2/NFE2L2/KCNJ2/SLC1A2/VMP1	7
GOBP_IMMUNE_RESPONSE_REGULATING_CELL_SURFACE_RECEPTOR_SIGNALING_PATHWAY	GOBP_IMMUNE_RESPONSE_REGULATING_CELL_SURFACE_RECEPTOR_SIGNALING_PATHWAY	GOBP_IMMUNE_RESPONSE_REGULATING_CELL_SURFACE_RECEPTOR_SIGNALING_PATHWAY	9/201	321/17872	0.0106562325702854	0.0569669207117585	0.0409081933230159	NFKBIZ/FPR2/LCP2/HCK/PDE4B/PTPN2/PRKCE/FPR1/PRKCH	9
GOBP_POSITIVE_REGULATION_OF_INTERLEUKIN_10_PRODUCTION	GOBP_POSITIVE_REGULATION_OF_INTERLEUKIN_10_PRODUCTION	GOBP_POSITIVE_REGULATION_OF_INTERLEUKIN_10_PRODUCTION	3/201	41/17872	0.0109148547311324	0.0580374539446846	0.041676947889773	STAT3/LILRA5/TLR4	3
GOBP_REGULATION_OF_MACROPHAGE_MIGRATION	GOBP_REGULATION_OF_MACROPHAGE_MIGRATION	GOBP_REGULATION_OF_MACROPHAGE_MIGRATION	3/201	41/17872	0.0109148547311324	0.0580374539446846	0.041676947889773	THBS1/SLAMF1/CCL3	3
GOBP_RESPONSE_TO_COPPER_ION	GOBP_RESPONSE_TO_COPPER_ION	GOBP_RESPONSE_TO_COPPER_ION	3/201	41/17872	0.0109148547311324	0.0580374539446846	0.041676947889773	IL1A/NFE2L2/MT2A	3
GOBP_REGULATION_OF_OXIDATIVE_STRESS_INDUCED_CELL_DEATH	GOBP_REGULATION_OF_OXIDATIVE_STRESS_INDUCED_CELL_DEATH	GOBP_REGULATION_OF_OXIDATIVE_STRESS_INDUCED_CELL_DEATH	4/201	77/17872	0.0110968023569187	0.0588832741962226	0.042284335088065	SOD2/TNF/NFE2L2/TLR4	4
GOBP_EMBRYONIC_APPENDAGE_MORPHOGENESIS	GOBP_EMBRYONIC_APPENDAGE_MORPHOGENESIS	GOBP_EMBRYONIC_APPENDAGE_MORPHOGENESIS	5/201	119/17872	0.0111331433612704	0.0588832741962226	0.042284335088065	ALDH1A2/ZBTB16/MBNL1/CHST11/ECE1	5
GOBP_RESPONSE_TO_FIBROBLAST_GROWTH_FACTOR	GOBP_RESPONSE_TO_FIBROBLAST_GROWTH_FACTOR	GOBP_RESPONSE_TO_FIBROBLAST_GROWTH_FACTOR	5/201	119/17872	0.0111331433612704	0.0588832741962226	0.042284335088065	ZFP36/CD44/THBS1/SCGB1A1/CXCL8	5
GOBP_PROTEIN_KINASE_B_SIGNALING	GOBP_PROTEIN_KINASE_B_SIGNALING	GOBP_PROTEIN_KINASE_B_SIGNALING	7/201	216/17872	0.0112870366362063	0.0595650562384934	0.0427739257354249	IL1B/THBS1/PTEN/INSR/TNF/CCL3/PLK3	7
GOBP_REGULATION_OF_RESPONSE_TO_WOUNDING	GOBP_REGULATION_OF_RESPONSE_TO_WOUNDING	GOBP_REGULATION_OF_RESPONSE_TO_WOUNDING	6/201	166/17872	0.0113019851930899	0.0595650562384934	0.0427739257354249	TNFAIP3/THBS1/PTEN/TNF/PRKCE/NFE2L2	6
GOBP_CELLULAR_RESPONSE_TO_ABIOTIC_STIMULUS	GOBP_CELLULAR_RESPONSE_TO_ABIOTIC_STIMULUS	GOBP_CELLULAR_RESPONSE_TO_ABIOTIC_STIMULUS	9/201	325/17872	0.0114856486445494	0.0604262608583615	0.0433923605154703	IL1B/NFKB1/PTEN/N4BP1/PTGS2/KCNJ2/IRF1/TLR4/EGR1	9
GOBP_REGULATION_OF_CELL_SUBSTRATE_ADHESION	GOBP_REGULATION_OF_CELL_SUBSTRATE_ADHESION	GOBP_REGULATION_OF_CELL_SUBSTRATE_ADHESION	7/201	217/17872	0.0115556143883826	0.0606873199305374	0.0435798281696785	THBS1/FMN1/PTEN/BCL6/RIN2/PRKCE/SDC4	7
GOBP_RECEPTOR_METABOLIC_PROCESS	GOBP_RECEPTOR_METABOLIC_PROCESS	GOBP_RECEPTOR_METABOLIC_PROCESS	6/201	167/17872	0.0116166983479041	0.0608008494715684	0.0436613542264557	PTPN1/INSR/LDLR/ADM/CXCL8/ECE1	6
GOBP_NEGATIVE_REGULATION_OF_INTERFERON_GAMMA_PRODUCTION	GOBP_NEGATIVE_REGULATION_OF_INTERFERON_GAMMA_PRODUCTION	GOBP_NEGATIVE_REGULATION_OF_INTERFERON_GAMMA_PRODUCTION	3/201	42/17872	0.0116587616150644	0.0608008494715684	0.0436613542264557	SCGB1A1/SLAMF1/TLR4	3
GOBP_POSITIVE_REGULATION_OF_GLUCOSE_METABOLIC_PROCESS	GOBP_POSITIVE_REGULATION_OF_GLUCOSE_METABOLIC_PROCESS	GOBP_POSITIVE_REGULATION_OF_GLUCOSE_METABOLIC_PROCESS	3/201	42/17872	0.0116587616150644	0.0608008494715684	0.0436613542264557	PMAIP1/INSR/PTPN2	3
GOBP_RESPONSE_TO_ELECTRICAL_STIMULUS	GOBP_RESPONSE_TO_ELECTRICAL_STIMULUS	GOBP_RESPONSE_TO_ELECTRICAL_STIMULUS	3/201	42/17872	0.0116587616150644	0.0608008494715684	0.0436613542264557	SOD2/PTEN/BTG2	3
GOBP_NEGATIVE_REGULATION_OF_CATABOLIC_PROCESS	GOBP_NEGATIVE_REGULATION_OF_CATABOLIC_PROCESS	GOBP_NEGATIVE_REGULATION_OF_CATABOLIC_PROCESS	9/201	326/17872	0.0117003618630873	0.0609113079190042	0.0437406749175763	IL1B/IRAK3/HNRNPC/ZFP36/N4BP1/HIPK2/TNF/STAT3/EIF4E	9
GOBP_GLIAL_CELL_DIFFERENTIATION	GOBP_GLIAL_CELL_DIFFERENTIATION	GOBP_GLIAL_CELL_DIFFERENTIATION	7/201	218/17872	0.0118287942644895	0.0613296285222246	0.0440410727606356	IL1B/FPR2/PTEN/LDLR/TNF/STAT3/TLR4	7
GOBP_CELLULAR_RESPONSE_TO_PROSTAGLANDIN_E_STIMULUS	GOBP_CELLULAR_RESPONSE_TO_PROSTAGLANDIN_E_STIMULUS	GOBP_CELLULAR_RESPONSE_TO_PROSTAGLANDIN_E_STIMULUS	2/201	15/17872	0.0120019041076068	0.0613296285222246	0.0440410727606356	PRKCE/GNG2	2
GOBP_LOCOMOTOR_RHYTHM	GOBP_LOCOMOTOR_RHYTHM	GOBP_LOCOMOTOR_RHYTHM	2/201	15/17872	0.0120019041076068	0.0613296285222246	0.0440410727606356	PTEN/EGR1	2
GOBP_NEGATIVE_REGULATION_OF_ENDOPLASMIC_RETICULUM_UNFOLDED_PROTEIN_RESPONSE	GOBP_NEGATIVE_REGULATION_OF_ENDOPLASMIC_RETICULUM_UNFOLDED_PROTEIN_RESPONSE	GOBP_NEGATIVE_REGULATION_OF_ENDOPLASMIC_RETICULUM_UNFOLDED_PROTEIN_RESPONSE	2/201	15/17872	0.0120019041076068	0.0613296285222246	0.0440410727606356	PTPN1/PPP1R15A	2
GOBP_POSITIVE_REGULATION_OF_FIBROBLAST_MIGRATION	GOBP_POSITIVE_REGULATION_OF_FIBROBLAST_MIGRATION	GOBP_POSITIVE_REGULATION_OF_FIBROBLAST_MIGRATION	2/201	15/17872	0.0120019041076068	0.0613296285222246	0.0440410727606356	THBS1/PRKCE	2
GOBP_REGULATION_OF_CELL_PROLIFERATION_INVOLVED_IN_KIDNEY_DEVELOPMENT	GOBP_REGULATION_OF_CELL_PROLIFERATION_INVOLVED_IN_KIDNEY_DEVELOPMENT	GOBP_REGULATION_OF_CELL_PROLIFERATION_INVOLVED_IN_KIDNEY_DEVELOPMENT	2/201	15/17872	0.0120019041076068	0.0613296285222246	0.0440410727606356	CFLAR/EGR1	2
GOBP_REGULATION_OF_NUCLEAR_TRANSCRIBED_MRNA_POLY_A_TAIL_SHORTENING	GOBP_REGULATION_OF_NUCLEAR_TRANSCRIBED_MRNA_POLY_A_TAIL_SHORTENING	GOBP_REGULATION_OF_NUCLEAR_TRANSCRIBED_MRNA_POLY_A_TAIL_SHORTENING	2/201	15/17872	0.0120019041076068	0.0613296285222246	0.0440410727606356	ZFP36/BTG2	2
GOBP_REGULATION_OF_PODOSOME_ASSEMBLY	GOBP_REGULATION_OF_PODOSOME_ASSEMBLY	GOBP_REGULATION_OF_PODOSOME_ASSEMBLY	2/201	15/17872	0.0120019041076068	0.0613296285222246	0.0440410727606356	HCK/TNF	2
GOBP_REGULATION_OF_UNSATURATED_FATTY_ACID_BIOSYNTHETIC_PROCESS	GOBP_REGULATION_OF_UNSATURATED_FATTY_ACID_BIOSYNTHETIC_PROCESS	GOBP_REGULATION_OF_UNSATURATED_FATTY_ACID_BIOSYNTHETIC_PROCESS	2/201	15/17872	0.0120019041076068	0.0613296285222246	0.0440410727606356	IL1B/PTGS2	2
GOBP_T_HELPER_2_CELL_DIFFERENTIATION	GOBP_T_HELPER_2_CELL_DIFFERENTIATION	GOBP_T_HELPER_2_CELL_DIFFERENTIATION	2/201	15/17872	0.0120019041076068	0.0613296285222246	0.0440410727606356	NLRP3/BCL6	2
GOBP_ANTIMICROBIAL_HUMORAL_IMMUNE_RESPONSE_MEDIATED_BY_ANTIMICROBIAL_PEPTIDE	GOBP_ANTIMICROBIAL_HUMORAL_IMMUNE_RESPONSE_MEDIATED_BY_ANTIMICROBIAL_PEPTIDE	GOBP_ANTIMICROBIAL_HUMORAL_IMMUNE_RESPONSE_MEDIATED_BY_ANTIMICROBIAL_PEPTIDE	4/201	79/17872	0.0121096718738151	0.0613296285222246	0.0440410727606356	CXCL2/CXCL3/RPL30/CXCL8	4
GOBP_GLUCOSE_IMPORT	GOBP_GLUCOSE_IMPORT	GOBP_GLUCOSE_IMPORT	4/201	79/17872	0.0121096718738151	0.0613296285222246	0.0440410727606356	INSR/TNF/NFE2L2/SLC1A2	4
GOBP_INTRINSIC_APOPTOTIC_SIGNALING_PATHWAY_BY_P53_CLASS_MEDIATOR	GOBP_INTRINSIC_APOPTOTIC_SIGNALING_PATHWAY_BY_P53_CLASS_MEDIATOR	GOBP_INTRINSIC_APOPTOTIC_SIGNALING_PATHWAY_BY_P53_CLASS_MEDIATOR	4/201	79/17872	0.0121096718738151	0.0613296285222246	0.0440410727606356	PMAIP1/CD44/TP53BP2/HIPK2	4
GOBP_NEGATIVE_REGULATION_OF_TUMOR_NECROSIS_FACTOR_SUPERFAMILY_CYTOKINE_PRODUCTION	GOBP_NEGATIVE_REGULATION_OF_TUMOR_NECROSIS_FACTOR_SUPERFAMILY_CYTOKINE_PRODUCTION	GOBP_NEGATIVE_REGULATION_OF_TUMOR_NECROSIS_FACTOR_SUPERFAMILY_CYTOKINE_PRODUCTION	4/201	79/17872	0.0121096718738151	0.0613296285222246	0.0440410727606356	TNFAIP3/IRAK3/SLAMF1/TLR4	4
GOBP_POSITIVE_REGULATION_OF_PHOSPHATIDYLINOSITOL_3_KINASE_SIGNALING	GOBP_POSITIVE_REGULATION_OF_PHOSPHATIDYLINOSITOL_3_KINASE_SIGNALING	GOBP_POSITIVE_REGULATION_OF_PHOSPHATIDYLINOSITOL_3_KINASE_SIGNALING	4/201	79/17872	0.0121096718738151	0.0613296285222246	0.0440410727606356	INSR/TNF/PIK3AP1/FLT1	4
GOBP_REGULATION_OF_ERBB_SIGNALING_PATHWAY	GOBP_REGULATION_OF_ERBB_SIGNALING_PATHWAY	GOBP_REGULATION_OF_ERBB_SIGNALING_PATHWAY	4/201	79/17872	0.0121096718738151	0.0613296285222246	0.0440410727606356	AREG/EREG/PTPN2/PTPN12	4
GOBP_CARBOHYDRATE_TRANSMEMBRANE_TRANSPORT	GOBP_CARBOHYDRATE_TRANSMEMBRANE_TRANSPORT	GOBP_CARBOHYDRATE_TRANSMEMBRANE_TRANSPORT	5/201	122/17872	0.0123021622454049	0.0620936547851823	0.0445897233402777	IL1B/INSR/TNF/NFE2L2/SLC1A2	5
GOBP_POSITIVE_REGULATION_OF_PRODUCTION_OF_MOLECULAR_MEDIATOR_OF_IMMUNE_RESPONSE	GOBP_POSITIVE_REGULATION_OF_PRODUCTION_OF_MOLECULAR_MEDIATOR_OF_IMMUNE_RESPONSE	GOBP_POSITIVE_REGULATION_OF_PRODUCTION_OF_MOLECULAR_MEDIATOR_OF_IMMUNE_RESPONSE	5/201	122/17872	0.0123021622454049	0.0620936547851823	0.0445897233402777	NLRP3/IL1B/SLAMF1/CD55/TLR4	5
GOBP_POSITIVE_REGULATION_OF_CELL_CYCLE	GOBP_POSITIVE_REGULATION_OF_CELL_CYCLE	GOBP_POSITIVE_REGULATION_OF_CELL_CYCLE	9/201	329/17872	0.0123625575785774	0.0622930899609734	0.0447329386066944	IL1B/OOEP/IL1A/EREG/INSR/TNF/PRKCE/CCND3/EIF4E	9
GOBP_FAT_SOLUBLE_VITAMIN_METABOLIC_PROCESS	GOBP_FAT_SOLUBLE_VITAMIN_METABOLIC_PROCESS	GOBP_FAT_SOLUBLE_VITAMIN_METABOLIC_PROCESS	3/201	43/17872	0.0124311897971375	0.0625332869559209	0.044905425112585	ALDH1A2/NFKB1/TNF	3
GOBP_REGULATION_OF_MUSCLE_CONTRACTION	GOBP_REGULATION_OF_MUSCLE_CONTRACTION	GOBP_REGULATION_OF_MUSCLE_CONTRACTION	6/201	170/17872	0.0125979165462416	0.0632652947094927	0.045431083061495	PDE4B/ATP1A1/PTGS2/KCNJ2/KCNMA1/PKP2	6
GOBP_AMINOGLYCAN_BIOSYNTHETIC_PROCESS	GOBP_AMINOGLYCAN_BIOSYNTHETIC_PROCESS	GOBP_AMINOGLYCAN_BIOSYNTHETIC_PROCESS	4/201	80/17872	0.0126375797547719	0.0633578158125792	0.0454975228676884	IL1B/NFKB1/CHST11/CSGALNACT2	4
GOBP_CELLULAR_RESPONSE_TO_TOXIC_SUBSTANCE	GOBP_CELLULAR_RESPONSE_TO_TOXIC_SUBSTANCE	GOBP_CELLULAR_RESPONSE_TO_TOXIC_SUBSTANCE	5/201	123/17872	0.0127096367001729	0.0635056051534603	0.04560365103562	SOD2/GCH1/TNF/NFE2L2/PTGS2	5
GOBP_GLAND_MORPHOGENESIS	GOBP_GLAND_MORPHOGENESIS	GOBP_GLAND_MORPHOGENESIS	5/201	123/17872	0.0127096367001729	0.0635056051534603	0.04560365103562	TNFAIP3/CFLAR/AREG/TNF/CSMD1	5
GOBP_POSITIVE_REGULATION_OF_GLUCOSE_TRANSMEMBRANE_TRANSPORT	GOBP_POSITIVE_REGULATION_OF_GLUCOSE_TRANSMEMBRANE_TRANSPORT	GOBP_POSITIVE_REGULATION_OF_GLUCOSE_TRANSMEMBRANE_TRANSPORT	3/201	44/17872	0.0132323007508722	0.0658964159262968	0.047320502641288	INSR/NFE2L2/SLC1A2	3
GOBP_REGULATION_OF_EXTRINSIC_APOPTOTIC_SIGNALING_PATHWAY_IN_ABSENCE_OF_LIGAND	GOBP_REGULATION_OF_EXTRINSIC_APOPTOTIC_SIGNALING_PATHWAY_IN_ABSENCE_OF_LIGAND	GOBP_REGULATION_OF_EXTRINSIC_APOPTOTIC_SIGNALING_PATHWAY_IN_ABSENCE_OF_LIGAND	3/201	44/17872	0.0132323007508722	0.0658964159262968	0.047320502641288	IL1B/IL1A/TNF	3
GOBP_CD40_SIGNALING_PATHWAY	GOBP_CD40_SIGNALING_PATHWAY	GOBP_CD40_SIGNALING_PATHWAY	2/201	16/17872	0.0136158256732989	0.0670231154842419	0.048129590490122	TNFAIP3/SLAMF1	2
GOBP_NEGATIVE_REGULATION_OF_ALCOHOL_BIOSYNTHETIC_PROCESS	GOBP_NEGATIVE_REGULATION_OF_ALCOHOL_BIOSYNTHETIC_PROCESS	GOBP_NEGATIVE_REGULATION_OF_ALCOHOL_BIOSYNTHETIC_PROCESS	2/201	16/17872	0.0136158256732989	0.0670231154842419	0.048129590490122	NFKB1/PLEK	2
GOBP_NEGATIVE_REGULATION_OF_B_CELL_MEDIATED_IMMUNITY	GOBP_NEGATIVE_REGULATION_OF_B_CELL_MEDIATED_IMMUNITY	GOBP_NEGATIVE_REGULATION_OF_B_CELL_MEDIATED_IMMUNITY	2/201	16/17872	0.0136158256732989	0.0670231154842419	0.048129590490122	BCL6/CD55	2
GOBP_NEGATIVE_REGULATION_OF_SMOOTH_MUSCLE_CONTRACTION	GOBP_NEGATIVE_REGULATION_OF_SMOOTH_MUSCLE_CONTRACTION	GOBP_NEGATIVE_REGULATION_OF_SMOOTH_MUSCLE_CONTRACTION	2/201	16/17872	0.0136158256732989	0.0670231154842419	0.048129590490122	PTGS2/KCNMA1	2
GOBP_POSITIVE_REGULATION_OF_MYOBLAST_FUSION	GOBP_POSITIVE_REGULATION_OF_MYOBLAST_FUSION	GOBP_POSITIVE_REGULATION_OF_MYOBLAST_FUSION	2/201	16/17872	0.0136158256732989	0.0670231154842419	0.048129590490122	SCGB3A1/EHD1	2
GOBP_PROGESTERONE_METABOLIC_PROCESS	GOBP_PROGESTERONE_METABOLIC_PROCESS	GOBP_PROGESTERONE_METABOLIC_PROCESS	2/201	16/17872	0.0136158256732989	0.0670231154842419	0.048129590490122	ADM/EGR1	2
GOBP_REGULATION_OF_GLIAL_CELL_MIGRATION	GOBP_REGULATION_OF_GLIAL_CELL_MIGRATION	GOBP_REGULATION_OF_GLIAL_CELL_MIGRATION	2/201	16/17872	0.0136158256732989	0.0670231154842419	0.048129590490122	GPR183/CCL3	2
GOBP_VASOCONSTRICTION	GOBP_VASOCONSTRICTION	GOBP_VASOCONSTRICTION	4/201	82/17872	0.0137370099295936	0.0674685619244139	0.0484494675145764	TBXAS1/ADM/PTGS2/ECE1	4
GOBP_SIGNAL_RELEASE	GOBP_SIGNAL_RELEASE	GOBP_SIGNAL_RELEASE	11/201	453/17872	0.0137515540228105	0.0674685619244139	0.0484494675145764	IL1B/IL1A/IL1RN/MCTP1/ENSA/TNF/PRKCE/ADM/SYN1/STX11/KLF7	11
GOBP_AMINO_ACID_IMPORT_ACROSS_PLASMA_MEMBRANE	GOBP_AMINO_ACID_IMPORT_ACROSS_PLASMA_MEMBRANE	GOBP_AMINO_ACID_IMPORT_ACROSS_PLASMA_MEMBRANE	3/201	45/17872	0.0140622389286866	0.068207575161418	0.0489801561315827	SLC1A3/TNF/SLC1A2	3
GOBP_MYOBLAST_FUSION	GOBP_MYOBLAST_FUSION	GOBP_MYOBLAST_FUSION	3/201	45/17872	0.0140622389286866	0.068207575161418	0.0489801561315827	CFLAR/SCGB3A1/EHD1	3
GOBP_NEGATIVE_REGULATION_OF_INTERLEUKIN_1_BETA_PRODUCTION	GOBP_NEGATIVE_REGULATION_OF_INTERLEUKIN_1_BETA_PRODUCTION	GOBP_NEGATIVE_REGULATION_OF_INTERLEUKIN_1_BETA_PRODUCTION	3/201	45/17872	0.0140622389286866	0.068207575161418	0.0489801561315827	NLRP3/TNFAIP3/MEFV	3
GOBP_POSITIVE_REGULATION_OF_MIRNA_TRANSCRIPTION	GOBP_POSITIVE_REGULATION_OF_MIRNA_TRANSCRIPTION	GOBP_POSITIVE_REGULATION_OF_MIRNA_TRANSCRIPTION	3/201	45/17872	0.0140622389286866	0.068207575161418	0.0489801561315827	TNF/STAT3/EGR1	3
GOBP_POSITIVE_REGULATION_OF_ORGANIC_ACID_TRANSPORT	GOBP_POSITIVE_REGULATION_OF_ORGANIC_ACID_TRANSPORT	GOBP_POSITIVE_REGULATION_OF_ORGANIC_ACID_TRANSPORT	3/201	45/17872	0.0140622389286866	0.068207575161418	0.0489801561315827	IL1B/ACSL1/IL1A	3
GOBP_POSITIVE_REGULATION_OF_SIGNALING_RECEPTOR_ACTIVITY	GOBP_POSITIVE_REGULATION_OF_SIGNALING_RECEPTOR_ACTIVITY	GOBP_POSITIVE_REGULATION_OF_SIGNALING_RECEPTOR_ACTIVITY	3/201	45/17872	0.0140622389286866	0.068207575161418	0.0489801561315827	AREG/EREG/IFNGR2	3
GOBP_T_HELPER_1_TYPE_IMMUNE_RESPONSE	GOBP_T_HELPER_1_TYPE_IMMUNE_RESPONSE	GOBP_T_HELPER_1_TYPE_IMMUNE_RESPONSE	3/201	45/17872	0.0140622389286866	0.068207575161418	0.0489801561315827	IL1B/SLAMF1/TLR4	3
GOBP_FOCAL_ADHESION_ASSEMBLY	GOBP_FOCAL_ADHESION_ASSEMBLY	GOBP_FOCAL_ADHESION_ASSEMBLY	4/201	83/17872	0.0143087877020867	0.0692907690183842	0.049758002347482	THBS1/FMN1/PTEN/SDC4	4
GOBP_RESPONSE_TO_HYDROGEN_PEROXIDE	GOBP_RESPONSE_TO_HYDROGEN_PEROXIDE	GOBP_RESPONSE_TO_HYDROGEN_PEROXIDE	5/201	128/17872	0.0148843787349766	0.0715590634004769	0.0513868744005401	TNFAIP3/SOD2/AREG/NFE2L2/KDM6B	5
GOBP_MEMBRANE_DOCKING	GOBP_MEMBRANE_DOCKING	GOBP_MEMBRANE_DOCKING	4/201	84/17872	0.0148954376751156	0.0715590634004769	0.0513868744005401	ICAM1/STX11/PLEK/VMP1	4
GOBP_CELLULAR_MODIFIED_AMINO_ACID_BIOSYNTHETIC_PROCESS	GOBP_CELLULAR_MODIFIED_AMINO_ACID_BIOSYNTHETIC_PROCESS	GOBP_CELLULAR_MODIFIED_AMINO_ACID_BIOSYNTHETIC_PROCESS	3/201	46/17872	0.0149211322276556	0.0715590634004769	0.0513868744005401	GCH1/NFE2L2/SLC1A2	3
GOBP_NEGATIVE_REGULATION_OF_T_CELL_DIFFERENTIATION	GOBP_NEGATIVE_REGULATION_OF_T_CELL_DIFFERENTIATION	GOBP_NEGATIVE_REGULATION_OF_T_CELL_DIFFERENTIATION	3/201	46/17872	0.0149211322276556	0.0715590634004769	0.0513868744005401	BCL6/PTPN2/IRF1	3
GOBP_REGULATION_OF_HUMORAL_IMMUNE_RESPONSE	GOBP_REGULATION_OF_HUMORAL_IMMUNE_RESPONSE	GOBP_REGULATION_OF_HUMORAL_IMMUNE_RESPONSE	3/201	46/17872	0.0149211322276556	0.0715590634004769	0.0513868744005401	IL1B/CD55/TNF	3
GOBP_RESPONSE_TO_INTERLEUKIN_6	GOBP_RESPONSE_TO_INTERLEUKIN_6	GOBP_RESPONSE_TO_INTERLEUKIN_6	3/201	46/17872	0.0149211322276556	0.0715590634004769	0.0513868744005401	NFKB1/PTPN2/STAT3	3
GOBP_APPENDAGE_DEVELOPMENT	GOBP_APPENDAGE_DEVELOPMENT	GOBP_APPENDAGE_DEVELOPMENT	6/201	177/17872	0.0151112139772261	0.0723007277797425	0.0519194668143254	ALDH1A2/ZBTB16/MBNL1/FMN1/CHST11/ECE1	6
GOBP_CELLULAR_RESPONSE_TO_THYROID_HORMONE_STIMULUS	GOBP_CELLULAR_RESPONSE_TO_THYROID_HORMONE_STIMULUS	GOBP_CELLULAR_RESPONSE_TO_THYROID_HORMONE_STIMULUS	2/201	17/17872	0.0153181562040889	0.0723007277797425	0.0519194668143254	KLF9/CTSB	2
GOBP_DENTATE_GYRUS_DEVELOPMENT	GOBP_DENTATE_GYRUS_DEVELOPMENT	GOBP_DENTATE_GYRUS_DEVELOPMENT	2/201	17/17872	0.0153181562040889	0.0723007277797425	0.0519194668143254	PTEN/BTG2	2
GOBP_G_PROTEIN_COUPLED_RECEPTOR_SIGNALING_PATHWAY_INVOLVED_IN_HEART_PROCESS	GOBP_G_PROTEIN_COUPLED_RECEPTOR_SIGNALING_PATHWAY_INVOLVED_IN_HEART_PROCESS	GOBP_G_PROTEIN_COUPLED_RECEPTOR_SIGNALING_PATHWAY_INVOLVED_IN_HEART_PROCESS	2/201	17/17872	0.0153181562040889	0.0723007277797425	0.0519194668143254	PDE4B/AKAP13	2
GOBP_GLOMERULAR_MESANGIUM_DEVELOPMENT	GOBP_GLOMERULAR_MESANGIUM_DEVELOPMENT	GOBP_GLOMERULAR_MESANGIUM_DEVELOPMENT	2/201	17/17872	0.0153181562040889	0.0723007277797425	0.0519194668143254	CFLAR/EGR1	2
GOBP_INFLAMMATORY_RESPONSE_TO_WOUNDING	GOBP_INFLAMMATORY_RESPONSE_TO_WOUNDING	GOBP_INFLAMMATORY_RESPONSE_TO_WOUNDING	2/201	17/17872	0.0153181562040889	0.0723007277797425	0.0519194668143254	IL1A/TLR4	2
GOBP_MACROPHAGE_CYTOKINE_PRODUCTION	GOBP_MACROPHAGE_CYTOKINE_PRODUCTION	GOBP_MACROPHAGE_CYTOKINE_PRODUCTION	2/201	17/17872	0.0153181562040889	0.0723007277797425	0.0519194668143254	IRAK3/TLR4	2
GOBP_NEGATIVE_REGULATION_OF_CELL_SUBSTRATE_JUNCTION_ORGANIZATION	GOBP_NEGATIVE_REGULATION_OF_CELL_SUBSTRATE_JUNCTION_ORGANIZATION	GOBP_NEGATIVE_REGULATION_OF_CELL_SUBSTRATE_JUNCTION_ORGANIZATION	2/201	17/17872	0.0153181562040889	0.0723007277797425	0.0519194668143254	THBS1/PTEN	2
GOBP_POSITIVE_REGULATION_OF_NITRIC_OXIDE_SYNTHASE_BIOSYNTHETIC_PROCESS	GOBP_POSITIVE_REGULATION_OF_NITRIC_OXIDE_SYNTHASE_BIOSYNTHETIC_PROCESS	GOBP_POSITIVE_REGULATION_OF_NITRIC_OXIDE_SYNTHASE_BIOSYNTHETIC_PROCESS	2/201	17/17872	0.0153181562040889	0.0723007277797425	0.0519194668143254	NAMPT/TLR4	2
GOBP_REGULATION_OF_KETONE_BIOSYNTHETIC_PROCESS	GOBP_REGULATION_OF_KETONE_BIOSYNTHETIC_PROCESS	GOBP_REGULATION_OF_KETONE_BIOSYNTHETIC_PROCESS	2/201	17/17872	0.0153181562040889	0.0723007277797425	0.0519194668143254	ADM/EGR1	2
GOBP_HORMONE_METABOLIC_PROCESS	GOBP_HORMONE_METABOLIC_PROCESS	GOBP_HORMONE_METABOLIC_PROCESS	7/201	230/17872	0.0154811887721199	0.0729547963779361	0.0523891563170598	ALDH1A2/NFKB1/ATP1A1/ADM/CTSB/ECE1/EGR1	7
GOBP_PROTEIN_LOCALIZATION_TO_PLASMA_MEMBRANE	GOBP_PROTEIN_LOCALIZATION_TO_PLASMA_MEMBRANE	GOBP_PROTEIN_LOCALIZATION_TO_PLASMA_MEMBRANE	8/201	285/17872	0.0155585648197154	0.0732037836864525	0.0525679551853242	KCNIP4/EHD1/RAPGEF2/TNF/RILPL2/PRKCE/PKP2/PRKCH	8
GOBP_MEMBRANE_PROTEIN_ECTODOMAIN_PROTEOLYSIS	GOBP_MEMBRANE_PROTEIN_ECTODOMAIN_PROTEOLYSIS	GOBP_MEMBRANE_PROTEIN_ECTODOMAIN_PROTEOLYSIS	3/201	47/17872	0.0158090924458945	0.0739161798841746	0.053079529990753	IL1B/TNF/SNX9	3
GOBP_NEGATIVE_REGULATION_OF_BLOOD_PRESSURE	GOBP_NEGATIVE_REGULATION_OF_BLOOD_PRESSURE	GOBP_NEGATIVE_REGULATION_OF_BLOOD_PRESSURE	3/201	47/17872	0.0158090924458945	0.0739161798841746	0.053079529990753	SOD2/GCH1/TNF	3
GOBP_REGULATION_OF_NECROTIC_CELL_DEATH	GOBP_REGULATION_OF_NECROTIC_CELL_DEATH	GOBP_REGULATION_OF_NECROTIC_CELL_DEATH	3/201	47/17872	0.0158090924458945	0.0739161798841746	0.053079529990753	PELI1/CFLAR/BIRC3	3
GOBP_RESPONSE_TO_EPIDERMAL_GROWTH_FACTOR	GOBP_RESPONSE_TO_EPIDERMAL_GROWTH_FACTOR	GOBP_RESPONSE_TO_EPIDERMAL_GROWTH_FACTOR	3/201	47/17872	0.0158090924458945	0.0739161798841746	0.053079529990753	CFLAR/ZFP36/PTPN12	3
GOBP_INSULIN_SECRETION	GOBP_INSULIN_SECRETION	GOBP_INSULIN_SECRETION	6/201	179/17872	0.015888892437176	0.0740571345939	0.0531807501803506	IL1B/IL1RN/ENSA/TNF/PRKCE/KLF7	6
GOBP_RESPONSE_TO_TEMPERATURE_STIMULUS	GOBP_RESPONSE_TO_TEMPERATURE_STIMULUS	GOBP_RESPONSE_TO_TEMPERATURE_STIMULUS	6/201	179/17872	0.015888892437176	0.0740571345939	0.0531807501803506	NFKBIA/SOD2/IL1A/THBS1/ADM/PTGS2	6
GOBP_IMPORT_INTO_CELL	GOBP_IMPORT_INTO_CELL	GOBP_IMPORT_INTO_CELL	7/201	232/17872	0.0161599731529979	0.0752031199928125	0.0540036872753934	ACSL1/THBS1/SLC1A3/ATP1A1/TNF/KCNJ2/SLC1A2	7
GOBP_NEGATIVE_REGULATION_OF_CELL_DEVELOPMENT	GOBP_NEGATIVE_REGULATION_OF_CELL_DEVELOPMENT	GOBP_NEGATIVE_REGULATION_OF_CELL_DEVELOPMENT	6/201	180/17872	0.0162879402095422	0.0756805695405987	0.0543465458705007	IL1B/IL1A/PTEN/LDLR/RAPGEF2/TNF	6
GOBP_GRANULOCYTE_ACTIVATION	GOBP_GRANULOCYTE_ACTIVATION	GOBP_GRANULOCYTE_ACTIVATION	3/201	48/17872	0.0167262157297271	0.0768502471545604	0.055186496448129	TNF/CCL3/CXCL8	3
GOBP_NEGATIVE_REGULATION_OF_DEPHOSPHORYLATION	GOBP_NEGATIVE_REGULATION_OF_DEPHOSPHORYLATION	GOBP_NEGATIVE_REGULATION_OF_DEPHOSPHORYLATION	3/201	48/17872	0.0167262157297271	0.0768502471545604	0.055186496448129	PPP1R15A/ENSA/TNF	3
GOBP_NEUTRAL_LIPID_BIOSYNTHETIC_PROCESS	GOBP_NEUTRAL_LIPID_BIOSYNTHETIC_PROCESS	GOBP_NEUTRAL_LIPID_BIOSYNTHETIC_PROCESS	3/201	48/17872	0.0167262157297271	0.0768502471545604	0.055186496448129	ACSL1/LDLR/GK	3
GOBP_REGULATION_OF_ERYTHROCYTE_DIFFERENTIATION	GOBP_REGULATION_OF_ERYTHROCYTE_DIFFERENTIATION	GOBP_REGULATION_OF_ERYTHROCYTE_DIFFERENTIATION	3/201	48/17872	0.0167262157297271	0.0768502471545604	0.055186496448129	ZFP36/RBFOX2/STAT3	3
GOBP_REGULATION_OF_P38MAPK_CASCADE	GOBP_REGULATION_OF_P38MAPK_CASCADE	GOBP_REGULATION_OF_P38MAPK_CASCADE	3/201	48/17872	0.0167262157297271	0.0768502471545604	0.055186496448129	IL1B/DUSP1/GADD45B	3
GOBP_REGULATION_OF_REACTIVE_OXYGEN_SPECIES_BIOSYNTHETIC_PROCESS	GOBP_REGULATION_OF_REACTIVE_OXYGEN_SPECIES_BIOSYNTHETIC_PROCESS	GOBP_REGULATION_OF_REACTIVE_OXYGEN_SPECIES_BIOSYNTHETIC_PROCESS	3/201	48/17872	0.0167262157297271	0.0768502471545604	0.055186496448129	SOD2/CFLAR/TLR4	3
GOBP_POSITIVE_REGULATION_OF_LIPID_TRANSPORT	GOBP_POSITIVE_REGULATION_OF_LIPID_TRANSPORT	GOBP_POSITIVE_REGULATION_OF_LIPID_TRANSPORT	4/201	87/17872	0.0167457796347517	0.0768502471545604	0.055186496448129	IL1B/NFKBIA/ACSL1/IL1A	4
GOBP_POSITIVE_REGULATION_OF_NEURON_DEATH	GOBP_POSITIVE_REGULATION_OF_NEURON_DEATH	GOBP_POSITIVE_REGULATION_OF_NEURON_DEATH	4/201	87/17872	0.0167457796347517	0.0768502471545604	0.055186496448129	TNF/CCL3/TLR4/EGR1	4
GOBP_REGULATION_OF_CELLULAR_KETONE_METABOLIC_PROCESS	GOBP_REGULATION_OF_CELLULAR_KETONE_METABOLIC_PROCESS	GOBP_REGULATION_OF_CELLULAR_KETONE_METABOLIC_PROCESS	5/201	132/17872	0.0167939179075888	0.0768514401928025	0.0551873531740753	IL1B/PRKCE/ADM/PTGS2/EGR1	5
GOBP_CHEMOKINE_C_X_C_MOTIF_LIGAND_2_PRODUCTION	GOBP_CHEMOKINE_C_X_C_MOTIF_LIGAND_2_PRODUCTION	GOBP_CHEMOKINE_C_X_C_MOTIF_LIGAND_2_PRODUCTION	2/201	18/17872	0.0171067235293399	0.0768514401928025	0.0551873531740753	TNF/TLR4	2
GOBP_CHONDROITIN_SULFATE_BIOSYNTHETIC_PROCESS	GOBP_CHONDROITIN_SULFATE_BIOSYNTHETIC_PROCESS	GOBP_CHONDROITIN_SULFATE_BIOSYNTHETIC_PROCESS	2/201	18/17872	0.0171067235293399	0.0768514401928025	0.0551873531740753	CHST11/CSGALNACT2	2
GOBP_EOSINOPHIL_CHEMOTAXIS	GOBP_EOSINOPHIL_CHEMOTAXIS	GOBP_EOSINOPHIL_CHEMOTAXIS	2/201	18/17872	0.0171067235293399	0.0768514401928025	0.0551873531740753	CCL4/CCL3	2
GOBP_FATTY_ACID_TRANSMEMBRANE_TRANSPORT	GOBP_FATTY_ACID_TRANSMEMBRANE_TRANSPORT	GOBP_FATTY_ACID_TRANSMEMBRANE_TRANSPORT	2/201	18/17872	0.0171067235293399	0.0768514401928025	0.0551873531740753	ACSL1/THBS1	2
GOBP_LIPID_IMPORT_INTO_CELL	GOBP_LIPID_IMPORT_INTO_CELL	GOBP_LIPID_IMPORT_INTO_CELL	2/201	18/17872	0.0171067235293399	0.0768514401928025	0.0551873531740753	ACSL1/THBS1	2
GOBP_NEGATIVE_REGULATION_OF_CARDIAC_MUSCLE_CELL_PROLIFERATION	GOBP_NEGATIVE_REGULATION_OF_CARDIAC_MUSCLE_CELL_PROLIFERATION	GOBP_NEGATIVE_REGULATION_OF_CARDIAC_MUSCLE_CELL_PROLIFERATION	2/201	18/17872	0.0171067235293399	0.0768514401928025	0.0551873531740753	PTEN/SAV1	2
GOBP_NONRIBOSOMAL_PEPTIDE_BIOSYNTHETIC_PROCESS	GOBP_NONRIBOSOMAL_PEPTIDE_BIOSYNTHETIC_PROCESS	GOBP_NONRIBOSOMAL_PEPTIDE_BIOSYNTHETIC_PROCESS	2/201	18/17872	0.0171067235293399	0.0768514401928025	0.0551873531740753	NFE2L2/SLC1A2	2
GOBP_POSITIVE_REGULATION_OF_MACROPHAGE_CHEMOTAXIS	GOBP_POSITIVE_REGULATION_OF_MACROPHAGE_CHEMOTAXIS	GOBP_POSITIVE_REGULATION_OF_MACROPHAGE_CHEMOTAXIS	2/201	18/17872	0.0171067235293399	0.0768514401928025	0.0551873531740753	THBS1/SLAMF1	2
GOBP_POSITIVE_REGULATION_OF_T_HELPER_1_TYPE_IMMUNE_RESPONSE	GOBP_POSITIVE_REGULATION_OF_T_HELPER_1_TYPE_IMMUNE_RESPONSE	GOBP_POSITIVE_REGULATION_OF_T_HELPER_1_TYPE_IMMUNE_RESPONSE	2/201	18/17872	0.0171067235293399	0.0768514401928025	0.0551873531740753	IL1B/SLAMF1	2
GOBP_REGULATION_OF_ENDOTHELIAL_CELL_DEVELOPMENT	GOBP_REGULATION_OF_ENDOTHELIAL_CELL_DEVELOPMENT	GOBP_REGULATION_OF_ENDOTHELIAL_CELL_DEVELOPMENT	2/201	18/17872	0.0171067235293399	0.0768514401928025	0.0551873531740753	IL1B/TNF	2
GOBP_REGULATION_OF_HUMORAL_IMMUNE_RESPONSE_MEDIATED_BY_CIRCULATING_IMMUNOGLOBULIN	GOBP_REGULATION_OF_HUMORAL_IMMUNE_RESPONSE_MEDIATED_BY_CIRCULATING_IMMUNOGLOBULIN	GOBP_REGULATION_OF_HUMORAL_IMMUNE_RESPONSE_MEDIATED_BY_CIRCULATING_IMMUNOGLOBULIN	2/201	18/17872	0.0171067235293399	0.0768514401928025	0.0551873531740753	CD55/TNF	2
GOBP_SEQUESTERING_OF_TRIGLYCERIDE	GOBP_SEQUESTERING_OF_TRIGLYCERIDE	GOBP_SEQUESTERING_OF_TRIGLYCERIDE	2/201	18/17872	0.0171067235293399	0.0768514401928025	0.0551873531740753	IL1B/TNF	2
GOBP_TOLL_LIKE_RECEPTOR_2_SIGNALING_PATHWAY	GOBP_TOLL_LIKE_RECEPTOR_2_SIGNALING_PATHWAY	GOBP_TOLL_LIKE_RECEPTOR_2_SIGNALING_PATHWAY	2/201	18/17872	0.0171067235293399	0.0768514401928025	0.0551873531740753	TNFAIP3/PIK3AP1	2
GOBP_REGULATION_OF_T_CELL_MEDIATED_IMMUNITY	GOBP_REGULATION_OF_T_CELL_MEDIATED_IMMUNITY	GOBP_REGULATION_OF_T_CELL_MEDIATED_IMMUNITY	4/201	88/17872	0.0173930574339877	0.0780202862038879	0.0560267065740642	NLRP3/IL1B/SLAMF1/CD55	4
GOBP_CELL_MATRIX_ADHESION	GOBP_CELL_MATRIX_ADHESION	GOBP_CELL_MATRIX_ADHESION	7/201	236/17872	0.0175804734223184	0.0786245160701284	0.0564606066668001	CD44/THBS1/FMN1/PTEN/BCL6/RIN2/SDC4	7
GOBP_RESPONSE_TO_ALCOHOL	GOBP_RESPONSE_TO_ALCOHOL	GOBP_RESPONSE_TO_ALCOHOL	7/201	236/17872	0.0175804734223184	0.0786245160701284	0.0564606066668001	SOD2/TBXAS1/KLF9/TNF/CCL3/PRKCE/GNG2	7
GOBP_POSITIVE_REGULATION_OF_APOPTOTIC_SIGNALING_PATHWAY	GOBP_POSITIVE_REGULATION_OF_APOPTOTIC_SIGNALING_PATHWAY	GOBP_POSITIVE_REGULATION_OF_APOPTOTIC_SIGNALING_PATHWAY	5/201	134/17872	0.017806980817075	0.0790472520487031	0.0567641752100891	PMAIP1/THBS1/PTEN/TNF/PTPN2	5
GOBP_REGULATION_OF_CELLULAR_RESPONSE_TO_TRANSFORMING_GROWTH_FACTOR_BETA_STIMULUS	GOBP_REGULATION_OF_CELLULAR_RESPONSE_TO_TRANSFORMING_GROWTH_FACTOR_BETA_STIMULUS	GOBP_REGULATION_OF_CELLULAR_RESPONSE_TO_TRANSFORMING_GROWTH_FACTOR_BETA_STIMULUS	5/201	134/17872	0.017806980817075	0.0790472520487031	0.0567641752100891	CFLAR/THBS1/HIPK2/CHST11/LDLRAD4	5
GOBP_RESPONSE_TO_PURINE_CONTAINING_COMPOUND	GOBP_RESPONSE_TO_PURINE_CONTAINING_COMPOUND	GOBP_RESPONSE_TO_PURINE_CONTAINING_COMPOUND	5/201	134/17872	0.017806980817075	0.0790472520487031	0.0567641752100891	IL1B/AREG/AQP9/RAPGEF2/PTGS2	5
GOBP_VIRAL_GENOME_REPLICATION	GOBP_VIRAL_GENOME_REPLICATION	GOBP_VIRAL_GENOME_REPLICATION	5/201	134/17872	0.017806980817075	0.0790472520487031	0.0567641752100891	N4BP1/ISG20/TNF/CXCL8/TNIP1	5
GOBP_RESPONSE_TO_METAL_ION	GOBP_RESPONSE_TO_METAL_ION	GOBP_RESPONSE_TO_METAL_ION	9/201	350/17872	0.0178074935892486	0.0790472520487031	0.0567641752100891	SOD2/CLIC4/IL1A/THBS1/AQP9/NFE2L2/PTGS2/KCNMA1/MT2A	9
GOBP_POSITIVE_REGULATION_OF_CELL_DIVISION	GOBP_POSITIVE_REGULATION_OF_CELL_DIVISION	GOBP_POSITIVE_REGULATION_OF_CELL_DIVISION	4/201	89/17872	0.018055757130777	0.0800301983968912	0.0574700332542914	IL1B/IL1A/EREG/PRKCE	4
GOBP_POSITIVE_REGULATION_OF_PROTEOLYSIS_INVOLVED_IN_CELLULAR_PROTEIN_CATABOLIC_PROCESS	GOBP_POSITIVE_REGULATION_OF_PROTEOLYSIS_INVOLVED_IN_CELLULAR_PROTEIN_CATABOLIC_PROCESS	GOBP_POSITIVE_REGULATION_OF_PROTEOLYSIS_INVOLVED_IN_CELLULAR_PROTEIN_CATABOLIC_PROCESS	5/201	135/17872	0.0183283437674851	0.08111787753473	0.0582511003698769	RNF144B/RNF19B/PTEN/PLK3/NFE2L2	5
GOBP_POSITIVE_REGULATION_OF_ALPHA_BETA_T_CELL_DIFFERENTIATION	GOBP_POSITIVE_REGULATION_OF_ALPHA_BETA_T_CELL_DIFFERENTIATION	GOBP_POSITIVE_REGULATION_OF_ALPHA_BETA_T_CELL_DIFFERENTIATION	3/201	50/17872	0.0186482604402945	0.0820468449755142	0.0589181959260975	NLRP3/ZBTB16/NFKBIZ	3
GOBP_PROSTANOID_METABOLIC_PROCESS	GOBP_PROSTANOID_METABOLIC_PROCESS	GOBP_PROSTANOID_METABOLIC_PROCESS	3/201	50/17872	0.0186482604402945	0.0820468449755142	0.0589181959260975	IL1B/TBXAS1/PTGS2	3
GOBP_REGULATION_OF_CD4_POSITIVE_ALPHA_BETA_T_CELL_DIFFERENTIATION	GOBP_REGULATION_OF_CD4_POSITIVE_ALPHA_BETA_T_CELL_DIFFERENTIATION	GOBP_REGULATION_OF_CD4_POSITIVE_ALPHA_BETA_T_CELL_DIFFERENTIATION	3/201	50/17872	0.0186482604402945	0.0820468449755142	0.0589181959260975	NLRP3/NFKBIZ/BCL6	3
GOBP_REGULATION_OF_GENE_SILENCING_BY_RNA	GOBP_REGULATION_OF_GENE_SILENCING_BY_RNA	GOBP_REGULATION_OF_GENE_SILENCING_BY_RNA	3/201	50/17872	0.0186482604402945	0.0820468449755142	0.0589181959260975	ZFP36/TNF/STAT3	3
GOBP_ENGULFMENT_OF_APOPTOTIC_CELL	GOBP_ENGULFMENT_OF_APOPTOTIC_CELL	GOBP_ENGULFMENT_OF_APOPTOTIC_CELL	2/201	19/17872	0.0189793927294911	0.0827712405147252	0.0594383875107948	THBS1/RHOH	2
GOBP_LEUKOCYTE_MIGRATION_INVOLVED_IN_INFLAMMATORY_RESPONSE	GOBP_LEUKOCYTE_MIGRATION_INVOLVED_IN_INFLAMMATORY_RESPONSE	GOBP_LEUKOCYTE_MIGRATION_INVOLVED_IN_INFLAMMATORY_RESPONSE	2/201	19/17872	0.0189793927294911	0.0827712405147252	0.0594383875107948	SLAMF1/TNF	2
GOBP_NEGATIVE_REGULATION_OF_NERVOUS_SYSTEM_PROCESS	GOBP_NEGATIVE_REGULATION_OF_NERVOUS_SYSTEM_PROCESS	GOBP_NEGATIVE_REGULATION_OF_NERVOUS_SYSTEM_PROCESS	2/201	19/17872	0.0189793927294911	0.0827712405147252	0.0594383875107948	PTEN/TNF	2
GOBP_PEPTIDYL_SERINE_DEPHOSPHORYLATION	GOBP_PEPTIDYL_SERINE_DEPHOSPHORYLATION	GOBP_PEPTIDYL_SERINE_DEPHOSPHORYLATION	2/201	19/17872	0.0189793927294911	0.0827712405147252	0.0594383875107948	PPP1R15A/DUSP1	2
GOBP_POSITIVE_REGULATION_OF_MACROPHAGE_DERIVED_FOAM_CELL_DIFFERENTIATION	GOBP_POSITIVE_REGULATION_OF_MACROPHAGE_DERIVED_FOAM_CELL_DIFFERENTIATION	GOBP_POSITIVE_REGULATION_OF_MACROPHAGE_DERIVED_FOAM_CELL_DIFFERENTIATION	2/201	19/17872	0.0189793927294911	0.0827712405147252	0.0594383875107948	NFKB1/PRKCH	2
GOBP_PROSTAGLANDIN_TRANSPORT	GOBP_PROSTAGLANDIN_TRANSPORT	GOBP_PROSTAGLANDIN_TRANSPORT	2/201	19/17872	0.0189793927294911	0.0827712405147252	0.0594383875107948	IL1B/IL1A	2
GOBP_HEPATICOBILIARY_SYSTEM_DEVELOPMENT	GOBP_HEPATICOBILIARY_SYSTEM_DEVELOPMENT	GOBP_HEPATICOBILIARY_SYSTEM_DEVELOPMENT	5/201	137/17872	0.0194010858683976	0.0844798231284437	0.0606653281106562	TNFAIP3/SOD2/ALDH1A2/CFLAR/TNF	5
GOBP_CELLULAR_RESPONSE_TO_ALCOHOL	GOBP_CELLULAR_RESPONSE_TO_ALCOHOL	GOBP_CELLULAR_RESPONSE_TO_ALCOHOL	4/201	91/17872	0.0194278104814322	0.0844798231284437	0.0606653281106562	SOD2/KLF9/PRKCE/GNG2	4
GOBP_NEGATIVE_REGULATION_OF_OSTEOBLAST_DIFFERENTIATION	GOBP_NEGATIVE_REGULATION_OF_OSTEOBLAST_DIFFERENTIATION	GOBP_NEGATIVE_REGULATION_OF_OSTEOBLAST_DIFFERENTIATION	3/201	51/17872	0.0196532997994085	0.0849649178284572	0.0610136767228012	AREG/TNF/TNFAIP6	3
GOBP_REGULATION_OF_MEIOTIC_CELL_CYCLE	GOBP_REGULATION_OF_MEIOTIC_CELL_CYCLE	GOBP_REGULATION_OF_MEIOTIC_CELL_CYCLE	3/201	51/17872	0.0196532997994085	0.0849649178284572	0.0610136767228012	OOEP/INSR/DUSP1	3
GOBP_RESPONSE_TO_COLD	GOBP_RESPONSE_TO_COLD	GOBP_RESPONSE_TO_COLD	3/201	51/17872	0.0196532997994085	0.0849649178284572	0.0610136767228012	NFKBIA/SOD2/ADM	3
GOBP_VIRAL_TRANSCRIPTION	GOBP_VIRAL_TRANSCRIPTION	GOBP_VIRAL_TRANSCRIPTION	3/201	51/17872	0.0196532997994085	0.0849649178284572	0.0610136767228012	CCL4/ZFP36/CCL3	3
GOBP_REGULATION_OF_NERVOUS_SYSTEM_PROCESS	GOBP_REGULATION_OF_NERVOUS_SYSTEM_PROCESS	GOBP_REGULATION_OF_NERVOUS_SYSTEM_PROCESS	5/201	138/17872	0.0199526020618841	0.0860095548419077	0.0617638351018164	IL1A/DLGAP1/PTEN/TNF/CCL3	5
GOBP_REGULATION_OF_PROTEASOMAL_UBIQUITIN_DEPENDENT_PROTEIN_CATABOLIC_PROCESS	GOBP_REGULATION_OF_PROTEASOMAL_UBIQUITIN_DEPENDENT_PROTEIN_CATABOLIC_PROCESS	GOBP_REGULATION_OF_PROTEASOMAL_UBIQUITIN_DEPENDENT_PROTEIN_CATABOLIC_PROCESS	5/201	138/17872	0.0199526020618841	0.0860095548419077	0.0617638351018164	RNF144B/RNF19B/N4BP1/PLK3/NFE2L2	5
GOBP_NEGATIVE_REGULATION_OF_RESPONSE_TO_CYTOKINE_STIMULUS	GOBP_NEGATIVE_REGULATION_OF_RESPONSE_TO_CYTOKINE_STIMULUS	GOBP_NEGATIVE_REGULATION_OF_RESPONSE_TO_CYTOKINE_STIMULUS	4/201	92/17872	0.0201373483915679	0.0866806785743826	0.0622457719705943	IRAK3/IL1R2/IL1RN/PTPN2	4
GOBP_POSITIVE_REGULATION_OF_LEUKOCYTE_MEDIATED_IMMUNITY	GOBP_POSITIVE_REGULATION_OF_LEUKOCYTE_MEDIATED_IMMUNITY	GOBP_POSITIVE_REGULATION_OF_LEUKOCYTE_MEDIATED_IMMUNITY	5/201	139/17872	0.0205143039946703	0.0873375071670868	0.0627174434373808	NLRP3/IL1B/SLAMF1/CD55/TNF	5
GOBP_PROTEIN_LOCALIZATION_TO_EXTRACELLULAR_REGION	GOBP_PROTEIN_LOCALIZATION_TO_EXTRACELLULAR_REGION	GOBP_PROTEIN_LOCALIZATION_TO_EXTRACELLULAR_REGION	9/201	359/17872	0.0206102762600138	0.0873375071670868	0.0627174434373808	IL1B/IL1A/IL1RN/ENSA/TNF/PRKCE/PLEK/KLF7/TLR4	9
GOBP_NEGATIVE_REGULATION_OF_DNA_BINDING_TRANSCRIPTION_FACTOR_ACTIVITY	GOBP_NEGATIVE_REGULATION_OF_DNA_BINDING_TRANSCRIPTION_FACTOR_ACTIVITY	GOBP_NEGATIVE_REGULATION_OF_DNA_BINDING_TRANSCRIPTION_FACTOR_ACTIVITY	6/201	190/17872	0.0206652448111438	0.0873375071670868	0.0627174434373808	NLRP3/TNFAIP3/PELI1/NFKBIA/IRAK3/IRAK2	6
GOBP_POSITIVE_REGULATION_OF_PEPTIDYL_TYROSINE_PHOSPHORYLATION	GOBP_POSITIVE_REGULATION_OF_PEPTIDYL_TYROSINE_PHOSPHORYLATION	GOBP_POSITIVE_REGULATION_OF_PEPTIDYL_TYROSINE_PHOSPHORYLATION	6/201	190/17872	0.0206652448111438	0.0873375071670868	0.0627174434373808	AREG/PTPN1/CD44/EREG/TNF/LILRA5	6
GOBP_RESPONSE_TO_KETONE	GOBP_RESPONSE_TO_KETONE	GOBP_RESPONSE_TO_KETONE	6/201	190/17872	0.0206652448111438	0.0873375071670868	0.0627174434373808	CFLAR/THBS1/KLF9/PRKCE/GNG2/EIF4E	6
GOBP_UNSATURATED_FATTY_ACID_BIOSYNTHETIC_PROCESS	GOBP_UNSATURATED_FATTY_ACID_BIOSYNTHETIC_PROCESS	GOBP_UNSATURATED_FATTY_ACID_BIOSYNTHETIC_PROCESS	3/201	52/17872	0.0206877389212298	0.0873375071670868	0.0627174434373808	IL1B/TBXAS1/PTGS2	3
GOBP_POSITIVE_REGULATION_OF_PROTEASOMAL_UBIQUITIN_DEPENDENT_PROTEIN_CATABOLIC_PROCESS	GOBP_POSITIVE_REGULATION_OF_PROTEASOMAL_UBIQUITIN_DEPENDENT_PROTEIN_CATABOLIC_PROCESS	GOBP_POSITIVE_REGULATION_OF_PROTEASOMAL_UBIQUITIN_DEPENDENT_PROTEIN_CATABOLIC_PROCESS	4/201	93/17872	0.0208626767284193	0.0873375071670868	0.0627174434373808	RNF144B/RNF19B/PLK3/NFE2L2	4
GOBP_POSITIVE_REGULATION_OF_PROTEIN_POLYMERIZATION	GOBP_POSITIVE_REGULATION_OF_PROTEIN_POLYMERIZATION	GOBP_POSITIVE_REGULATION_OF_PROTEIN_POLYMERIZATION	4/201	93/17872	0.0208626767284193	0.0873375071670868	0.0627174434373808	HCK/FMN1/PRKCE/SNX9	4
GOBP_C21_STEROID_HORMONE_BIOSYNTHETIC_PROCESS	GOBP_C21_STEROID_HORMONE_BIOSYNTHETIC_PROCESS	GOBP_C21_STEROID_HORMONE_BIOSYNTHETIC_PROCESS	2/201	20/17872	0.0209340655797744	0.0873375071670868	0.0627174434373808	ADM/EGR1	2
GOBP_CELLULAR_RESPONSE_TO_PROSTAGLANDIN_STIMULUS	GOBP_CELLULAR_RESPONSE_TO_PROSTAGLANDIN_STIMULUS	GOBP_CELLULAR_RESPONSE_TO_PROSTAGLANDIN_STIMULUS	2/201	20/17872	0.0209340655797744	0.0873375071670868	0.0627174434373808	PRKCE/GNG2	2
GOBP_INTERLEUKIN_13_PRODUCTION	GOBP_INTERLEUKIN_13_PRODUCTION	GOBP_INTERLEUKIN_13_PRODUCTION	2/201	20/17872	0.0209340655797744	0.0873375071670868	0.0627174434373808	SCGB1A1/LILRA5	2
GOBP_NEGATIVE_REGULATION_OF_OXIDATIVE_STRESS_INDUCED_INTRINSIC_APOPTOTIC_SIGNALING_PATHWAY	GOBP_NEGATIVE_REGULATION_OF_OXIDATIVE_STRESS_INDUCED_INTRINSIC_APOPTOTIC_SIGNALING_PATHWAY	GOBP_NEGATIVE_REGULATION_OF_OXIDATIVE_STRESS_INDUCED_INTRINSIC_APOPTOTIC_SIGNALING_PATHWAY	2/201	20/17872	0.0209340655797744	0.0873375071670868	0.0627174434373808	SOD2/NFE2L2	2
GOBP_NEGATIVE_REGULATION_OF_PROGRAMMED_NECROTIC_CELL_DEATH	GOBP_NEGATIVE_REGULATION_OF_PROGRAMMED_NECROTIC_CELL_DEATH	GOBP_NEGATIVE_REGULATION_OF_PROGRAMMED_NECROTIC_CELL_DEATH	2/201	20/17872	0.0209340655797744	0.0873375071670868	0.0627174434373808	PELI1/BIRC3	2
GOBP_PODOSOME_ASSEMBLY	GOBP_PODOSOME_ASSEMBLY	GOBP_PODOSOME_ASSEMBLY	2/201	20/17872	0.0209340655797744	0.0873375071670868	0.0627174434373808	HCK/TNF	2
GOBP_POSITIVE_REGULATION_OF_AMYLOID_BETA_FORMATION	GOBP_POSITIVE_REGULATION_OF_AMYLOID_BETA_FORMATION	GOBP_POSITIVE_REGULATION_OF_AMYLOID_BETA_FORMATION	2/201	20/17872	0.0209340655797744	0.0873375071670868	0.0627174434373808	TNF/GSAP	2
GOBP_POSITIVE_REGULATION_OF_LYMPHOCYTE_CHEMOTAXIS	GOBP_POSITIVE_REGULATION_OF_LYMPHOCYTE_CHEMOTAXIS	GOBP_POSITIVE_REGULATION_OF_LYMPHOCYTE_CHEMOTAXIS	2/201	20/17872	0.0209340655797744	0.0873375071670868	0.0627174434373808	CCL4/CCL3	2
GOBP_POSITIVE_REGULATION_OF_OXIDATIVE_STRESS_INDUCED_CELL_DEATH	GOBP_POSITIVE_REGULATION_OF_OXIDATIVE_STRESS_INDUCED_CELL_DEATH	GOBP_POSITIVE_REGULATION_OF_OXIDATIVE_STRESS_INDUCED_CELL_DEATH	2/201	20/17872	0.0209340655797744	0.0873375071670868	0.0627174434373808	TNF/TLR4	2
GOBP_REGULATION_OF_MICROGLIAL_CELL_ACTIVATION	GOBP_REGULATION_OF_MICROGLIAL_CELL_ACTIVATION	GOBP_REGULATION_OF_MICROGLIAL_CELL_ACTIVATION	2/201	20/17872	0.0209340655797744	0.0873375071670868	0.0627174434373808	LDLR/CCL3	2
GOBP_REGULATION_OF_TOLERANCE_INDUCTION	GOBP_REGULATION_OF_TOLERANCE_INDUCTION	GOBP_REGULATION_OF_TOLERANCE_INDUCTION	2/201	20/17872	0.0209340655797744	0.0873375071670868	0.0627174434373808	IRAK3/IL2RA	2
GOBP_RESPONSE_TO_MURAMYL_DIPEPTIDE	GOBP_RESPONSE_TO_MURAMYL_DIPEPTIDE	GOBP_RESPONSE_TO_MURAMYL_DIPEPTIDE	2/201	20/17872	0.0209340655797744	0.0873375071670868	0.0627174434373808	TNFAIP3/NFKBIA	2
GOBP_VITAMIN_BIOSYNTHETIC_PROCESS	GOBP_VITAMIN_BIOSYNTHETIC_PROCESS	GOBP_VITAMIN_BIOSYNTHETIC_PROCESS	2/201	20/17872	0.0209340655797744	0.0873375071670868	0.0627174434373808	NFKB1/TNF	2
GOBP_VITAMIN_D_METABOLIC_PROCESS	GOBP_VITAMIN_D_METABOLIC_PROCESS	GOBP_VITAMIN_D_METABOLIC_PROCESS	2/201	20/17872	0.0209340655797744	0.0873375071670868	0.0627174434373808	NFKB1/TNF	2
GOBP_CARBOHYDRATE_HOMEOSTASIS	GOBP_CARBOHYDRATE_HOMEOSTASIS	GOBP_CARBOHYDRATE_HOMEOSTASIS	7/201	247/17872	0.021937355318942	0.0913954342407878	0.0656314585034505	INSR/ICAM1/PTPN2/PRKCE/CSMD1/STAT3/KLF7	7
GOBP_REGULATION_OF_B_CELL_ACTIVATION	GOBP_REGULATION_OF_B_CELL_ACTIVATION	GOBP_REGULATION_OF_B_CELL_ACTIVATION	6/201	193/17872	0.0221201444975977	0.0920284393812191	0.0660860222456308	TNFAIP3/PELI1/SAMSN1/BCL6/GPR183/TLR4	6
GOBP_DIGESTIVE_SYSTEM_DEVELOPMENT	GOBP_DIGESTIVE_SYSTEM_DEVELOPMENT	GOBP_DIGESTIVE_SYSTEM_DEVELOPMENT	5/201	142/17872	0.0222611662007699	0.0923575226382427	0.0663223383625894	ALDH1A2/INSR/TNF/CXCL8/SAV1	5
GOBP_NEGATIVE_REGULATION_OF_TRANSMEMBRANE_TRANSPORT	GOBP_NEGATIVE_REGULATION_OF_TRANSMEMBRANE_TRANSPORT	GOBP_NEGATIVE_REGULATION_OF_TRANSMEMBRANE_TRANSPORT	5/201	142/17872	0.0222611662007699	0.0923575226382427	0.0663223383625894	IL1B/THBS1/SESTD1/TNF/PRKCE	5
GOBP_MYELOID_CELL_ACTIVATION_INVOLVED_IN_IMMUNE_RESPONSE	GOBP_MYELOID_CELL_ACTIVATION_INVOLVED_IN_IMMUNE_RESPONSE	GOBP_MYELOID_CELL_ACTIVATION_INVOLVED_IN_IMMUNE_RESPONSE	4/201	95/17872	0.0223610299398742	0.0925144969634461	0.0664350623076778	SLAMF1/ADGRE2/CCL3/PRKCE	4
GOBP_REGULATION_OF_SYSTEMIC_ARTERIAL_BLOOD_PRESSURE	GOBP_REGULATION_OF_SYSTEMIC_ARTERIAL_BLOOD_PRESSURE	GOBP_REGULATION_OF_SYSTEMIC_ARTERIAL_BLOOD_PRESSURE	4/201	95/17872	0.0223610299398742	0.0925144969634461	0.0664350623076778	SOD2/TNF/ADM/ECE1	4
GOBP_AMINO_ACID_IMPORT	GOBP_AMINO_ACID_IMPORT	GOBP_AMINO_ACID_IMPORT	3/201	54/17872	0.0228449004331763	0.0941147973143791	0.0675842449440731	SLC1A3/TNF/SLC1A2	3
GOBP_CARDIAC_MUSCLE_CELL_ACTION_POTENTIAL_INVOLVED_IN_CONTRACTION	GOBP_CARDIAC_MUSCLE_CELL_ACTION_POTENTIAL_INVOLVED_IN_CONTRACTION	GOBP_CARDIAC_MUSCLE_CELL_ACTION_POTENTIAL_INVOLVED_IN_CONTRACTION	3/201	54/17872	0.0228449004331763	0.0941147973143791	0.0675842449440731	ATP1A1/KCNJ2/PKP2	3
GOBP_I_KAPPAB_PHOSPHORYLATION	GOBP_I_KAPPAB_PHOSPHORYLATION	GOBP_I_KAPPAB_PHOSPHORYLATION	2/201	21/17872	0.0229686800016319	0.0941147973143791	0.0675842449440731	TNF/TLR4	2
GOBP_NEGATIVE_REGULATION_OF_SYSTEMIC_ARTERIAL_BLOOD_PRESSURE	GOBP_NEGATIVE_REGULATION_OF_SYSTEMIC_ARTERIAL_BLOOD_PRESSURE	GOBP_NEGATIVE_REGULATION_OF_SYSTEMIC_ARTERIAL_BLOOD_PRESSURE	2/201	21/17872	0.0229686800016319	0.0941147973143791	0.0675842449440731	SOD2/TNF	2
GOBP_NITRIC_OXIDE_SYNTHASE_BIOSYNTHETIC_PROCESS	GOBP_NITRIC_OXIDE_SYNTHASE_BIOSYNTHETIC_PROCESS	GOBP_NITRIC_OXIDE_SYNTHASE_BIOSYNTHETIC_PROCESS	2/201	21/17872	0.0229686800016319	0.0941147973143791	0.0675842449440731	NAMPT/TLR4	2
GOBP_POSITIVE_REGULATION_OF_TRANSFORMING_GROWTH_FACTOR_BETA_PRODUCTION	GOBP_POSITIVE_REGULATION_OF_TRANSFORMING_GROWTH_FACTOR_BETA_PRODUCTION	GOBP_POSITIVE_REGULATION_OF_TRANSFORMING_GROWTH_FACTOR_BETA_PRODUCTION	2/201	21/17872	0.0229686800016319	0.0941147973143791	0.0675842449440731	THBS1/PTGS2	2
GOBP_REGULATION_OF_B_CELL_APOPTOTIC_PROCESS	GOBP_REGULATION_OF_B_CELL_APOPTOTIC_PROCESS	GOBP_REGULATION_OF_B_CELL_APOPTOTIC_PROCESS	2/201	21/17872	0.0229686800016319	0.0941147973143791	0.0675842449440731	PTEN/BCL6	2
GOBP_POSITIVE_REGULATION_OF_PEPTIDASE_ACTIVITY	GOBP_POSITIVE_REGULATION_OF_PEPTIDASE_ACTIVITY	GOBP_POSITIVE_REGULATION_OF_PEPTIDASE_ACTIVITY	6/201	195/17872	0.0231276029630281	0.0944040239309382	0.06779193983431	NLRP3/CFLAR/PMAIP1/TNF/STAT3/MEFV	6
GOBP_HEART_GROWTH	GOBP_HEART_GROWTH	GOBP_HEART_GROWTH	4/201	96/17872	0.0231342076746617	0.0944040239309382	0.06779193983431	PTEN/AKAP13/DUSP6/SAV1	4
GOBP_REGULATION_OF_STRIATED_MUSCLE_CONTRACTION	GOBP_REGULATION_OF_STRIATED_MUSCLE_CONTRACTION	GOBP_REGULATION_OF_STRIATED_MUSCLE_CONTRACTION	4/201	96/17872	0.0231342076746617	0.0944040239309382	0.06779193983431	PDE4B/ATP1A1/KCNJ2/PKP2	4
GOBP_PHOSPHATIDYLINOSITOL_3_KINASE_SIGNALING	GOBP_PHOSPHATIDYLINOSITOL_3_KINASE_SIGNALING	GOBP_PHOSPHATIDYLINOSITOL_3_KINASE_SIGNALING	5/201	144/17872	0.0234778209653904	0.0956753277865569	0.0687048686577071	PTEN/INSR/TNF/PIK3AP1/FLT1	5
GOBP_ACTIN_POLYMERIZATION_OR_DEPOLYMERIZATION	GOBP_ACTIN_POLYMERIZATION_OR_DEPOLYMERIZATION	GOBP_ACTIN_POLYMERIZATION_OR_DEPOLYMERIZATION	6/201	196/17872	0.0236427246690236	0.0962158904334208	0.0690930490435313	HCK/FMN1/PRKCE/SNX9/GAS7/PLEK	6
GOBP_MACROPHAGE_MIGRATION	GOBP_MACROPHAGE_MIGRATION	GOBP_MACROPHAGE_MIGRATION	3/201	55/17872	0.0239676323166033	0.0971405532614504	0.0697570534386265	THBS1/SLAMF1/CCL3	3
GOBP_NEGATIVE_REGULATION_OF_LYMPHOCYTE_DIFFERENTIATION	GOBP_NEGATIVE_REGULATION_OF_LYMPHOCYTE_DIFFERENTIATION	GOBP_NEGATIVE_REGULATION_OF_LYMPHOCYTE_DIFFERENTIATION	3/201	55/17872	0.0239676323166033	0.0971405532614504	0.0697570534386265	BCL6/PTPN2/IRF1	3
GOBP_POSITIVE_REGULATION_OF_CELL_MATRIX_ADHESION	GOBP_POSITIVE_REGULATION_OF_CELL_MATRIX_ADHESION	GOBP_POSITIVE_REGULATION_OF_CELL_MATRIX_ADHESION	3/201	55/17872	0.0239676323166033	0.0971405532614504	0.0697570534386265	FMN1/RIN2/SDC4	3
GOBP_NEGATIVE_REGULATION_OF_HYDROLASE_ACTIVITY	GOBP_NEGATIVE_REGULATION_OF_HYDROLASE_ACTIVITY	GOBP_NEGATIVE_REGULATION_OF_HYDROLASE_ACTIVITY	9/201	369/17872	0.0240839593116594	0.097420210261251	0.0699578763454826	SERPINB9/BIRC3/CD44/THBS1/PPP1R15A/TNFAIP8/TNF/PTGS2/CTSB	9
GOBP_NEGATIVE_REGULATION_OF_NERVOUS_SYSTEM_DEVELOPMENT	GOBP_NEGATIVE_REGULATION_OF_NERVOUS_SYSTEM_DEVELOPMENT	GOBP_NEGATIVE_REGULATION_OF_NERVOUS_SYSTEM_DEVELOPMENT	5/201	145/17872	0.0241019494377483	0.097420210261251	0.0699578763454826	IL1B/PTEN/LDLR/RAPGEF2/TNF	5
GOBP_REGULATION_OF_PROTEIN_SECRETION	GOBP_REGULATION_OF_PROTEIN_SECRETION	GOBP_REGULATION_OF_PROTEIN_SECRETION	7/201	252/17872	0.0241459187084909	0.0974658667218247	0.0699906624482289	IL1B/IL1A/ENSA/TNF/PRKCE/KLF7/TLR4	7
GOBP_CELL_SUBSTRATE_JUNCTION_ORGANIZATION	GOBP_CELL_SUBSTRATE_JUNCTION_ORGANIZATION	GOBP_CELL_SUBSTRATE_JUNCTION_ORGANIZATION	4/201	98/17872	0.0247289184072572	0.0987250524675226	0.0708948892042304	THBS1/FMN1/PTEN/SDC4	4
GOBP_POSITIVE_REGULATION_OF_CYSTEINE_TYPE_ENDOPEPTIDASE_ACTIVITY	GOBP_POSITIVE_REGULATION_OF_CYSTEINE_TYPE_ENDOPEPTIDASE_ACTIVITY	GOBP_POSITIVE_REGULATION_OF_CYSTEINE_TYPE_ENDOPEPTIDASE_ACTIVITY	5/201	146/17872	0.0247366871904697	0.0987250524675226	0.0708948892042304	NLRP3/CFLAR/PMAIP1/TNF/MEFV	5
GOBP_CELL_PROLIFERATION_INVOLVED_IN_KIDNEY_DEVELOPMENT	GOBP_CELL_PROLIFERATION_INVOLVED_IN_KIDNEY_DEVELOPMENT	GOBP_CELL_PROLIFERATION_INVOLVED_IN_KIDNEY_DEVELOPMENT	2/201	22/17872	0.025081209521735	0.0987250524675226	0.0708948892042304	CFLAR/EGR1	2
GOBP_EOSINOPHIL_MIGRATION	GOBP_EOSINOPHIL_MIGRATION	GOBP_EOSINOPHIL_MIGRATION	2/201	22/17872	0.025081209521735	0.0987250524675226	0.0708948892042304	CCL4/CCL3	2
GOBP_NEGATIVE_REGULATION_OF_GLUCOSE_TRANSMEMBRANE_TRANSPORT	GOBP_NEGATIVE_REGULATION_OF_GLUCOSE_TRANSMEMBRANE_TRANSPORT	GOBP_NEGATIVE_REGULATION_OF_GLUCOSE_TRANSMEMBRANE_TRANSPORT	2/201	22/17872	0.025081209521735	0.0987250524675226	0.0708948892042304	IL1B/TNF	2
GOBP_NEGATIVE_REGULATION_OF_ORGANIC_ACID_TRANSPORT	GOBP_NEGATIVE_REGULATION_OF_ORGANIC_ACID_TRANSPORT	GOBP_NEGATIVE_REGULATION_OF_ORGANIC_ACID_TRANSPORT	2/201	22/17872	0.025081209521735	0.0987250524675226	0.0708948892042304	THBS1/TNF	2
GOBP_NEGATIVE_REGULATION_OF_RHO_PROTEIN_SIGNAL_TRANSDUCTION	GOBP_NEGATIVE_REGULATION_OF_RHO_PROTEIN_SIGNAL_TRANSDUCTION	GOBP_NEGATIVE_REGULATION_OF_RHO_PROTEIN_SIGNAL_TRANSDUCTION	2/201	22/17872	0.025081209521735	0.0987250524675226	0.0708948892042304	BCL6/ABL2	2
GOBP_POSITIVE_REGULATION_OF_NITRIC_OXIDE_SYNTHASE_ACTIVITY	GOBP_POSITIVE_REGULATION_OF_NITRIC_OXIDE_SYNTHASE_ACTIVITY	GOBP_POSITIVE_REGULATION_OF_NITRIC_OXIDE_SYNTHASE_ACTIVITY	2/201	22/17872	0.025081209521735	0.0987250524675226	0.0708948892042304	GCH1/TNF	2
GOBP_POSITIVE_REGULATION_OF_REACTIVE_OXYGEN_SPECIES_BIOSYNTHETIC_PROCESS	GOBP_POSITIVE_REGULATION_OF_REACTIVE_OXYGEN_SPECIES_BIOSYNTHETIC_PROCESS	GOBP_POSITIVE_REGULATION_OF_REACTIVE_OXYGEN_SPECIES_BIOSYNTHETIC_PROCESS	2/201	22/17872	0.025081209521735	0.0987250524675226	0.0708948892042304	SOD2/TLR4	2
GOBP_POSITIVE_REGULATION_OF_T_HELPER_CELL_DIFFERENTIATION	GOBP_POSITIVE_REGULATION_OF_T_HELPER_CELL_DIFFERENTIATION	GOBP_POSITIVE_REGULATION_OF_T_HELPER_CELL_DIFFERENTIATION	2/201	22/17872	0.025081209521735	0.0987250524675226	0.0708948892042304	NLRP3/NFKBIZ	2
GOBP_REGULATION_OF_BICELLULAR_TIGHT_JUNCTION_ASSEMBLY	GOBP_REGULATION_OF_BICELLULAR_TIGHT_JUNCTION_ASSEMBLY	GOBP_REGULATION_OF_BICELLULAR_TIGHT_JUNCTION_ASSEMBLY	2/201	22/17872	0.025081209521735	0.0987250524675226	0.0708948892042304	TNF/PRKCH	2
GOBP_REGULATION_OF_COMPLEMENT_ACTIVATION	GOBP_REGULATION_OF_COMPLEMENT_ACTIVATION	GOBP_REGULATION_OF_COMPLEMENT_ACTIVATION	2/201	22/17872	0.025081209521735	0.0987250524675226	0.0708948892042304	IL1B/CD55	2
GOBP_REGULATION_OF_ICOSANOID_SECRETION	GOBP_REGULATION_OF_ICOSANOID_SECRETION	GOBP_REGULATION_OF_ICOSANOID_SECRETION	2/201	22/17872	0.025081209521735	0.0987250524675226	0.0708948892042304	IL1B/IL1A	2
GOBP_REGULATION_OF_RECEPTOR_RECYCLING	GOBP_REGULATION_OF_RECEPTOR_RECYCLING	GOBP_REGULATION_OF_RECEPTOR_RECYCLING	2/201	22/17872	0.025081209521735	0.0987250524675226	0.0708948892042304	LDLR/ECE1	2
GOBP_RESPONSE_TO_LITHIUM_ION	GOBP_RESPONSE_TO_LITHIUM_ION	GOBP_RESPONSE_TO_LITHIUM_ION	2/201	22/17872	0.025081209521735	0.0987250524675226	0.0708948892042304	NFE2L2/PTGS2	2
GOBP_RESPONSE_TO_MANGANESE_ION	GOBP_RESPONSE_TO_MANGANESE_ION	GOBP_RESPONSE_TO_MANGANESE_ION	2/201	22/17872	0.025081209521735	0.0987250524675226	0.0708948892042304	SOD2/PTGS2	2
GOBP_VASCULAR_WOUND_HEALING	GOBP_VASCULAR_WOUND_HEALING	GOBP_VASCULAR_WOUND_HEALING	2/201	22/17872	0.025081209521735	0.0987250524675226	0.0708948892042304	TNFAIP3/TNF	2
GOBP_MULTICELLULAR_ORGANISMAL_MOVEMENT	GOBP_MULTICELLULAR_ORGANISMAL_MOVEMENT	GOBP_MULTICELLULAR_ORGANISMAL_MOVEMENT	3/201	56/17872	0.0251197837153368	0.0987250524675226	0.0708948892042304	HIPK2/TNF/KCNJ2	3
GOBP_RESPONSE_TO_GAMMA_RADIATION	GOBP_RESPONSE_TO_GAMMA_RADIATION	GOBP_RESPONSE_TO_GAMMA_RADIATION	3/201	56/17872	0.0251197837153368	0.0987250524675226	0.0708948892042304	SOD2/IL1A/EGR1	3
GOBP_SODIUM_ION_HOMEOSTASIS	GOBP_SODIUM_ION_HOMEOSTASIS	GOBP_SODIUM_ION_HOMEOSTASIS	3/201	56/17872	0.0251197837153368	0.0987250524675226	0.0708948892042304	IL1A/SLC1A3/ATP1A1	3
GOBP_HUMORAL_IMMUNE_RESPONSE	GOBP_HUMORAL_IMMUNE_RESPONSE	GOBP_HUMORAL_IMMUNE_RESPONSE	8/201	312/17872	0.0251552508558116	0.0987343596090605	0.0709015727030147	IL1B/CXCL2/CXCL3/RPL30/GPR183/CD55/TNF/CXCL8	8
GOBP_CELLULAR_RESPONSE_TO_REACTIVE_OXYGEN_SPECIES	GOBP_CELLULAR_RESPONSE_TO_REACTIVE_OXYGEN_SPECIES	GOBP_CELLULAR_RESPONSE_TO_REACTIVE_OXYGEN_SPECIES	5/201	147/17872	0.0253820887528918	0.0993632162071865	0.0713531573589374	TNFAIP3/SOD2/GCH1/NFE2L2/KDM6B	5
GOBP_REGULATION_OF_INSULIN_SECRETION	GOBP_REGULATION_OF_INSULIN_SECRETION	GOBP_REGULATION_OF_INSULIN_SECRETION	5/201	147/17872	0.0253820887528918	0.0993632162071865	0.0713531573589374	IL1B/ENSA/TNF/PRKCE/KLF7	5
GOBP_CELL_DEATH_IN_RESPONSE_TO_OXIDATIVE_STRESS	GOBP_CELL_DEATH_IN_RESPONSE_TO_OXIDATIVE_STRESS	GOBP_CELL_DEATH_IN_RESPONSE_TO_OXIDATIVE_STRESS	4/201	99/17872	0.0255505810213334	0.0995005002436521	0.0714517416221155	SOD2/TNF/NFE2L2/TLR4	4
GOBP_FATTY_ACID_TRANSPORT	GOBP_FATTY_ACID_TRANSPORT	GOBP_FATTY_ACID_TRANSPORT	4/201	99/17872	0.0255505810213334	0.0995005002436521	0.0714517416221155	IL1B/ACSL1/IL1A/THBS1	4
GOBP_SENSORY_PERCEPTION_OF_PAIN	GOBP_SENSORY_PERCEPTION_OF_PAIN	GOBP_SENSORY_PERCEPTION_OF_PAIN	4/201	99/17872	0.0255505810213334	0.0995005002436521	0.0714517416221155	IL1A/TNF/CCL3/PTGS2	4
GOBP_VIRAL_GENE_EXPRESSION	GOBP_VIRAL_GENE_EXPRESSION	GOBP_VIRAL_GENE_EXPRESSION	4/201	99/17872	0.0255505810213334	0.0995005002436521	0.0714517416221155	CCL4/ZFP36/ST6GALNAC3/CCL3	4
GOBP_REGULATION_OF_SUPRAMOLECULAR_FIBER_ORGANIZATION	GOBP_REGULATION_OF_SUPRAMOLECULAR_FIBER_ORGANIZATION	GOBP_REGULATION_OF_SUPRAMOLECULAR_FIBER_ORGANIZATION	9/201	374/17872	0.0259692924458621	0.100999216904833	0.0725279765694494	HCK/FMN1/LDLR/PRKCE/AKAP13/SDC4/SNX9/PLEK/MTSS1	9
GOBP_CYTOPLASMIC_MICROTUBULE_ORGANIZATION	GOBP_CYTOPLASMIC_MICROTUBULE_ORGANIZATION	GOBP_CYTOPLASMIC_MICROTUBULE_ORGANIZATION	3/201	57/17872	0.0263013285888605	0.101439407828337	0.0728440795845461	PLK3/LIMK2/HOOK2	3
GOBP_ICOSANOID_BIOSYNTHETIC_PROCESS	GOBP_ICOSANOID_BIOSYNTHETIC_PROCESS	GOBP_ICOSANOID_BIOSYNTHETIC_PROCESS	3/201	57/17872	0.0263013285888605	0.101439407828337	0.0728440795845461	IL1B/TBXAS1/PTGS2	3
GOBP_INTERFERON_BETA_PRODUCTION	GOBP_INTERFERON_BETA_PRODUCTION	GOBP_INTERFERON_BETA_PRODUCTION	3/201	57/17872	0.0263013285888605	0.101439407828337	0.0728440795845461	REL/IRF1/TLR4	3
GOBP_PROTEIN_HOMOTETRAMERIZATION	GOBP_PROTEIN_HOMOTETRAMERIZATION	GOBP_PROTEIN_HOMOTETRAMERIZATION	3/201	57/17872	0.0263013285888605	0.101439407828337	0.0728440795845461	SOD2/ALDH1A2/KCNJ2	3
GOBP_REGULATION_OF_ACTION_POTENTIAL	GOBP_REGULATION_OF_ACTION_POTENTIAL	GOBP_REGULATION_OF_ACTION_POTENTIAL	3/201	57/17872	0.0263013285888605	0.101439407828337	0.0728440795845461	TNF/KCNJ2/PKP2	3
GOBP_B_CELL_PROLIFERATION	GOBP_B_CELL_PROLIFERATION	GOBP_B_CELL_PROLIFERATION	4/201	100/17872	0.0263885284863525	0.101439407828337	0.0728440795845461	PELI1/BCL6/GPR183/TLR4	4
GOBP_CELLULAR_OXIDANT_DETOXIFICATION	GOBP_CELLULAR_OXIDANT_DETOXIFICATION	GOBP_CELLULAR_OXIDANT_DETOXIFICATION	4/201	100/17872	0.0263885284863525	0.101439407828337	0.0728440795845461	SOD2/GCH1/NFE2L2/PTGS2	4
GOBP_REGULATION_OF_GLIOGENESIS	GOBP_REGULATION_OF_GLIOGENESIS	GOBP_REGULATION_OF_GLIOGENESIS	4/201	100/17872	0.0263885284863525	0.101439407828337	0.0728440795845461	IL1B/LDLR/TNF/PRKCH	4
GOBP_REGULATION_OF_PHAGOCYTOSIS	GOBP_REGULATION_OF_PHAGOCYTOSIS	GOBP_REGULATION_OF_PHAGOCYTOSIS	4/201	100/17872	0.0263885284863525	0.101439407828337	0.0728440795845461	IL1B/FPR2/HCK/TNF	4
GOBP_REGULATION_OF_CELLULAR_RESPONSE_TO_GROWTH_FACTOR_STIMULUS	GOBP_REGULATION_OF_CELLULAR_RESPONSE_TO_GROWTH_FACTOR_STIMULUS	GOBP_REGULATION_OF_CELLULAR_RESPONSE_TO_GROWTH_FACTOR_STIMULUS	8/201	315/17872	0.0264306647824635	0.101470621680938	0.0728664943877441	IL1B/CFLAR/PTPN1/THBS1/HIPK2/TNFAIP6/CHST11/LDLRAD4	8
GOBP_SULFUR_COMPOUND_BIOSYNTHETIC_PROCESS	GOBP_SULFUR_COMPOUND_BIOSYNTHETIC_PROCESS	GOBP_SULFUR_COMPOUND_BIOSYNTHETIC_PROCESS	5/201	149/17872	0.0267050938330668	0.102392409902363	0.0735284345153443	ACSL1/NFE2L2/CHST11/CSGALNACT2/SLC1A2	5
GOBP_RESPONSE_TO_RADIATION	GOBP_RESPONSE_TO_RADIATION	GOBP_RESPONSE_TO_RADIATION	10/201	438/17872	0.0267620524833724	0.102479079021694	0.0735906719865724	SOD2/IL1A/SLC1A3/N4BP1/TNF/PLK3/PTGS2/MT-ND3/SLC1A2/EGR1	10
GOBP_BRANCHING_INVOLVED_IN_MAMMARY_GLAND_DUCT_MORPHOGENESIS	GOBP_BRANCHING_INVOLVED_IN_MAMMARY_GLAND_DUCT_MORPHOGENESIS	GOBP_BRANCHING_INVOLVED_IN_MAMMARY_GLAND_DUCT_MORPHOGENESIS	2/201	23/17872	0.027269662738503	0.103491777848519	0.0743178954149785	AREG/CSMD1	2
GOBP_CHONDROITIN_SULFATE_PROTEOGLYCAN_BIOSYNTHETIC_PROCESS	GOBP_CHONDROITIN_SULFATE_PROTEOGLYCAN_BIOSYNTHETIC_PROCESS	GOBP_CHONDROITIN_SULFATE_PROTEOGLYCAN_BIOSYNTHETIC_PROCESS	2/201	23/17872	0.027269662738503	0.103491777848519	0.0743178954149785	CHST11/CSGALNACT2	2
GOBP_DECIDUALIZATION	GOBP_DECIDUALIZATION	GOBP_DECIDUALIZATION	2/201	23/17872	0.027269662738503	0.103491777848519	0.0743178954149785	PTGS2/CTSB	2
GOBP_NEGATIVE_REGULATION_OF_LEUKOCYTE_CHEMOTAXIS	GOBP_NEGATIVE_REGULATION_OF_LEUKOCYTE_CHEMOTAXIS	GOBP_NEGATIVE_REGULATION_OF_LEUKOCYTE_CHEMOTAXIS	2/201	23/17872	0.027269662738503	0.103491777848519	0.0743178954149785	DUSP1/TNFAIP6	2
GOBP_POSITIVE_REGULATION_OF_FATTY_ACID_BIOSYNTHETIC_PROCESS	GOBP_POSITIVE_REGULATION_OF_FATTY_ACID_BIOSYNTHETIC_PROCESS	GOBP_POSITIVE_REGULATION_OF_FATTY_ACID_BIOSYNTHETIC_PROCESS	2/201	23/17872	0.027269662738503	0.103491777848519	0.0743178954149785	IL1B/PTGS2	2
GOBP_REGULATION_OF_PLATELET_DERIVED_GROWTH_FACTOR_RECEPTOR_SIGNALING_PATHWAY	GOBP_REGULATION_OF_PLATELET_DERIVED_GROWTH_FACTOR_RECEPTOR_SIGNALING_PATHWAY	GOBP_REGULATION_OF_PLATELET_DERIVED_GROWTH_FACTOR_RECEPTOR_SIGNALING_PATHWAY	2/201	23/17872	0.027269662738503	0.103491777848519	0.0743178954149785	PTPN2/PTPN12	2
GOBP_RESPONSE_TO_PROSTAGLANDIN_E	GOBP_RESPONSE_TO_PROSTAGLANDIN_E	GOBP_RESPONSE_TO_PROSTAGLANDIN_E	2/201	23/17872	0.027269662738503	0.103491777848519	0.0743178954149785	PRKCE/GNG2	2
GOBP_DETOXIFICATION	GOBP_DETOXIFICATION	GOBP_DETOXIFICATION	5/201	150/17872	0.0273827988001918	0.103491777848519	0.0743178954149785	SOD2/GCH1/NFE2L2/PTGS2/MT2A	5
GOBP_POSITIVE_REGULATION_OF_NEURON_PROJECTION_DEVELOPMENT	GOBP_POSITIVE_REGULATION_OF_NEURON_PROJECTION_DEVELOPMENT	GOBP_POSITIVE_REGULATION_OF_NEURON_PROJECTION_DEVELOPMENT	5/201	150/17872	0.0273827988001918	0.103491777848519	0.0743178954149785	CFLAR/EHD1/RAPGEF2/NFE2L2/ABL2	5
GOBP_EMBRYONIC_DIGIT_MORPHOGENESIS	GOBP_EMBRYONIC_DIGIT_MORPHOGENESIS	GOBP_EMBRYONIC_DIGIT_MORPHOGENESIS	3/201	58/17872	0.0275122292436728	0.103491777848519	0.0743178954149785	ZBTB16/CHST11/ECE1	3
GOBP_MATERNAL_PROCESS_INVOLVED_IN_FEMALE_PREGNANCY	GOBP_MATERNAL_PROCESS_INVOLVED_IN_FEMALE_PREGNANCY	GOBP_MATERNAL_PROCESS_INVOLVED_IN_FEMALE_PREGNANCY	3/201	58/17872	0.0275122292436728	0.103491777848519	0.0743178954149785	CSMD1/PTGS2/CTSB	3
GOBP_MEMBRANE_PROTEIN_PROTEOLYSIS	GOBP_MEMBRANE_PROTEIN_PROTEOLYSIS	GOBP_MEMBRANE_PROTEIN_PROTEOLYSIS	3/201	58/17872	0.0275122292436728	0.103491777848519	0.0743178954149785	IL1B/TNF/SNX9	3
GOBP_POSITIVE_REGULATION_OF_WOUND_HEALING	GOBP_POSITIVE_REGULATION_OF_WOUND_HEALING	GOBP_POSITIVE_REGULATION_OF_WOUND_HEALING	3/201	58/17872	0.0275122292436728	0.103491777848519	0.0743178954149785	THBS1/PRKCE/NFE2L2	3
GOBP_VASCULAR_ENDOTHELIAL_GROWTH_FACTOR_RECEPTOR_SIGNALING_PATHWAY	GOBP_VASCULAR_ENDOTHELIAL_GROWTH_FACTOR_RECEPTOR_SIGNALING_PATHWAY	GOBP_VASCULAR_ENDOTHELIAL_GROWTH_FACTOR_RECEPTOR_SIGNALING_PATHWAY	3/201	58/17872	0.0275122292436728	0.103491777848519	0.0743178954149785	IL1B/PTPN1/FLT1	3
GOBP_REGULATION_OF_CARBOHYDRATE_BIOSYNTHETIC_PROCESS	GOBP_REGULATION_OF_CARBOHYDRATE_BIOSYNTHETIC_PROCESS	GOBP_REGULATION_OF_CARBOHYDRATE_BIOSYNTHETIC_PROCESS	4/201	102/17872	0.0281134951942452	0.105620347814148	0.0758464307573763	NFKB1/INSR/PTPN2/PLEK	4
GOBP_CONNECTIVE_TISSUE_DEVELOPMENT	GOBP_CONNECTIVE_TISSUE_DEVELOPMENT	GOBP_CONNECTIVE_TISSUE_DEVELOPMENT	7/201	261/17872	0.0284985607470224	0.106932335482224	0.0767885748032977	ZBTB16/CFLAR/CD44/CHST11/NAMPT/KLF7/EGR1	7
GOBP_ACTIN_MEDIATED_CELL_CONTRACTION	GOBP_ACTIN_MEDIATED_CELL_CONTRACTION	GOBP_ACTIN_MEDIATED_CELL_CONTRACTION	4/201	103/17872	0.0290006136163339	0.108407055661058	0.0778475777723776	PDE4B/ATP1A1/KCNJ2/PKP2	4
GOBP_POSITIVE_REGULATION_OF_PROTEIN_LOCALIZATION_TO_MEMBRANE	GOBP_POSITIVE_REGULATION_OF_PROTEIN_LOCALIZATION_TO_MEMBRANE	GOBP_POSITIVE_REGULATION_OF_PROTEIN_LOCALIZATION_TO_MEMBRANE	4/201	103/17872	0.0290006136163339	0.108407055661058	0.0778475777723776	TNF/PRKCE/TNFAIP6/PRKCH	4
GOBP_REGULATION_OF_SIGNAL_TRANSDUCTION_BY_P53_CLASS_MEDIATOR	GOBP_REGULATION_OF_SIGNAL_TRANSDUCTION_BY_P53_CLASS_MEDIATOR	GOBP_REGULATION_OF_SIGNAL_TRANSDUCTION_BY_P53_CLASS_MEDIATOR	4/201	103/17872	0.0290006136163339	0.108407055661058	0.0778475777723776	PMAIP1/CD44/HIPK2/PLK3	4
GOBP_POSITIVE_REGULATION_OF_PROTEIN_LOCALIZATION	GOBP_POSITIVE_REGULATION_OF_PROTEIN_LOCALIZATION	GOBP_POSITIVE_REGULATION_OF_PROTEIN_LOCALIZATION	10/201	445/17872	0.0293941526683259	0.108624171369344	0.0780034895060127	IL1B/IL1A/TNF/PLK3/PRKCE/LIMK2/TNFAIP6/PTGS2/TLR4/PRKCH	10
GOBP_3_UTR_MEDIATED_MRNA_STABILIZATION	GOBP_3_UTR_MEDIATED_MRNA_STABILIZATION	GOBP_3_UTR_MEDIATED_MRNA_STABILIZATION	2/201	24/17872	0.0295320827960233	0.108624171369344	0.0780034895060127	HNRNPC/ZFP36	2
GOBP_CELLULAR_RESPONSE_TO_GROWTH_HORMONE_STIMULUS	GOBP_CELLULAR_RESPONSE_TO_GROWTH_HORMONE_STIMULUS	GOBP_CELLULAR_RESPONSE_TO_GROWTH_HORMONE_STIMULUS	2/201	24/17872	0.0295320827960233	0.108624171369344	0.0780034895060127	PTPN1/STAT3	2
GOBP_NEGATIVE_REGULATION_OF_NECROTIC_CELL_DEATH	GOBP_NEGATIVE_REGULATION_OF_NECROTIC_CELL_DEATH	GOBP_NEGATIVE_REGULATION_OF_NECROTIC_CELL_DEATH	2/201	24/17872	0.0295320827960233	0.108624171369344	0.0780034895060127	PELI1/BIRC3	2
GOBP_NEGATIVE_REGULATION_OF_STEM_CELL_DIFFERENTIATION	GOBP_NEGATIVE_REGULATION_OF_STEM_CELL_DIFFERENTIATION	GOBP_NEGATIVE_REGULATION_OF_STEM_CELL_DIFFERENTIATION	2/201	24/17872	0.0295320827960233	0.108624171369344	0.0780034895060127	NFE2L2/STAT3	2
GOBP_OLEFINIC_COMPOUND_BIOSYNTHETIC_PROCESS	GOBP_OLEFINIC_COMPOUND_BIOSYNTHETIC_PROCESS	GOBP_OLEFINIC_COMPOUND_BIOSYNTHETIC_PROCESS	2/201	24/17872	0.0295320827960233	0.108624171369344	0.0780034895060127	ADM/EGR1	2
GOBP_POSITIVE_REGULATION_OF_COAGULATION	GOBP_POSITIVE_REGULATION_OF_COAGULATION	GOBP_POSITIVE_REGULATION_OF_COAGULATION	2/201	24/17872	0.0295320827960233	0.108624171369344	0.0780034895060127	THBS1/NFE2L2	2
GOBP_POSITIVE_REGULATION_OF_HUMORAL_IMMUNE_RESPONSE	GOBP_POSITIVE_REGULATION_OF_HUMORAL_IMMUNE_RESPONSE	GOBP_POSITIVE_REGULATION_OF_HUMORAL_IMMUNE_RESPONSE	2/201	24/17872	0.0295320827960233	0.108624171369344	0.0780034895060127	IL1B/TNF	2
GOBP_POSITIVE_REGULATION_OF_LEUKOCYTE_ADHESION_TO_VASCULAR_ENDOTHELIAL_CELL	GOBP_POSITIVE_REGULATION_OF_LEUKOCYTE_ADHESION_TO_VASCULAR_ENDOTHELIAL_CELL	GOBP_POSITIVE_REGULATION_OF_LEUKOCYTE_ADHESION_TO_VASCULAR_ENDOTHELIAL_CELL	2/201	24/17872	0.0295320827960233	0.108624171369344	0.0780034895060127	TNF/NFAT5	2
GOBP_POSITIVE_REGULATION_OF_SYNCYTIUM_FORMATION_BY_PLASMA_MEMBRANE_FUSION	GOBP_POSITIVE_REGULATION_OF_SYNCYTIUM_FORMATION_BY_PLASMA_MEMBRANE_FUSION	GOBP_POSITIVE_REGULATION_OF_SYNCYTIUM_FORMATION_BY_PLASMA_MEMBRANE_FUSION	2/201	24/17872	0.0295320827960233	0.108624171369344	0.0780034895060127	SCGB3A1/EHD1	2
GOBP_POSITIVE_REGULATION_OF_TRANSCRIPTION_FROM_RNA_POLYMERASE_II_PROMOTER_IN_RESPONSE_TO_STRESS	GOBP_POSITIVE_REGULATION_OF_TRANSCRIPTION_FROM_RNA_POLYMERASE_II_PROMOTER_IN_RESPONSE_TO_STRESS	GOBP_POSITIVE_REGULATION_OF_TRANSCRIPTION_FROM_RNA_POLYMERASE_II_PROMOTER_IN_RESPONSE_TO_STRESS	2/201	24/17872	0.0295320827960233	0.108624171369344	0.0780034895060127	ATF6/NFE2L2	2
GOBP_RESPONSE_TO_MUSCLE_STRETCH	GOBP_RESPONSE_TO_MUSCLE_STRETCH	GOBP_RESPONSE_TO_MUSCLE_STRETCH	2/201	24/17872	0.0295320827960233	0.108624171369344	0.0780034895060127	NFKBIA/NFKB1	2
GOBP_STARTLE_RESPONSE	GOBP_STARTLE_RESPONSE	GOBP_STARTLE_RESPONSE	2/201	24/17872	0.0295320827960233	0.108624171369344	0.0780034895060127	PTEN/CSMD1	2
GOBP_REGULATION_OF_MIRNA_TRANSCRIPTION	GOBP_REGULATION_OF_MIRNA_TRANSCRIPTION	GOBP_REGULATION_OF_MIRNA_TRANSCRIPTION	3/201	60/17872	0.0300218909856592	0.110124979045545	0.0790812260203198	TNF/STAT3/EGR1	3
GOBP_ORGANIC_ACID_TRANSPORT	GOBP_ORGANIC_ACID_TRANSPORT	GOBP_ORGANIC_ACID_TRANSPORT	8/201	323/17872	0.0300508658877215	0.110124979045545	0.0790812260203198	IL1B/ACSL1/IL1A/THBS1/AQP9/SLC1A3/TNF/SLC1A2	8
GOBP_STEROID_METABOLIC_PROCESS	GOBP_STEROID_METABOLIC_PROCESS	GOBP_STEROID_METABOLIC_PROCESS	8/201	323/17872	0.0300508658877215	0.110124979045545	0.0790812260203198	NFKB1/IL1A/ATP1A1/LDLR/CH25H/TNF/ADM/EGR1	8
GOBP_INTRACELLULAR_RECEPTOR_SIGNALING_PATHWAY	GOBP_INTRACELLULAR_RECEPTOR_SIGNALING_PATHWAY	GOBP_INTRACELLULAR_RECEPTOR_SIGNALING_PATHWAY	7/201	265/17872	0.0305936370114032	0.111976465282228	0.0804107863328454	TNFAIP3/NFKBIA/ALDH1A2/BIRC3/RBFOX2/STAT3/TLR4	7
GOBP_NEGATIVE_REGULATION_OF_LIPID_METABOLIC_PROCESS	GOBP_NEGATIVE_REGULATION_OF_LIPID_METABOLIC_PROCESS	GOBP_NEGATIVE_REGULATION_OF_LIPID_METABOLIC_PROCESS	4/201	105/17872	0.03082434050425	0.11268260750512	0.0809178701317707	IL1B/NFKB1/ATP1A1/TNF	4
GOBP_ACTIN_FILAMENT_ORGANIZATION	GOBP_ACTIN_FILAMENT_ORGANIZATION	GOBP_ACTIN_FILAMENT_ORGANIZATION	10/201	449/17872	0.030978325901582	0.112968638342811	0.0811232701193147	OOEP/HCK/RHOH/FMN1/PRKCE/SDC4/SNX9/GAS7/PLEK/MTSS1	10
GOBP_MUSCLE_SYSTEM_PROCESS	GOBP_MUSCLE_SYSTEM_PROCESS	GOBP_MUSCLE_SYSTEM_PROCESS	10/201	449/17872	0.030978325901582	0.112968638342811	0.0811232701193147	IL1B/CFLAR/PDE4B/ATP1A1/TNF/AKAP13/PTGS2/KCNJ2/KCNMA1/PKP2	10
GOBP_CORTICAL_CYTOSKELETON_ORGANIZATION	GOBP_CORTICAL_CYTOSKELETON_ORGANIZATION	GOBP_CORTICAL_CYTOSKELETON_ORGANIZATION	3/201	61/17872	0.0313205215860823	0.113799166737252	0.0817196761685717	RHOH/TNF/PLEK	3
GOBP_POSITIVE_REGULATION_OF_ACTIN_FILAMENT_BUNDLE_ASSEMBLY	GOBP_POSITIVE_REGULATION_OF_ACTIN_FILAMENT_BUNDLE_ASSEMBLY	GOBP_POSITIVE_REGULATION_OF_ACTIN_FILAMENT_BUNDLE_ASSEMBLY	3/201	61/17872	0.0313205215860823	0.113799166737252	0.0817196761685717	SDC4/PLEK/MTSS1	3
GOBP_REACTIVE_OXYGEN_SPECIES_BIOSYNTHETIC_PROCESS	GOBP_REACTIVE_OXYGEN_SPECIES_BIOSYNTHETIC_PROCESS	GOBP_REACTIVE_OXYGEN_SPECIES_BIOSYNTHETIC_PROCESS	3/201	61/17872	0.0313205215860823	0.113799166737252	0.0817196761685717	SOD2/CFLAR/TLR4	3
GOBP_CARBOHYDRATE_BIOSYNTHETIC_PROCESS	GOBP_CARBOHYDRATE_BIOSYNTHETIC_PROCESS	GOBP_CARBOHYDRATE_BIOSYNTHETIC_PROCESS	6/201	210/17872	0.0316765542817147	0.114952751122086	0.0825480701284279	NFKB1/INSR/PTPN2/CHST11/CSGALNACT2/PLEK	6
GOBP_MEMBRANE_REPOLARIZATION_DURING_CARDIAC_MUSCLE_CELL_ACTION_POTENTIAL	GOBP_MEMBRANE_REPOLARIZATION_DURING_CARDIAC_MUSCLE_CELL_ACTION_POTENTIAL	GOBP_MEMBRANE_REPOLARIZATION_DURING_CARDIAC_MUSCLE_CELL_ACTION_POTENTIAL	2/201	25/17872	0.0318665468652753	0.115221708241353	0.0827412094045746	ATP1A1/KCNJ2	2
GOBP_NEGATIVE_REGULATION_OF_MUSCLE_CONTRACTION	GOBP_NEGATIVE_REGULATION_OF_MUSCLE_CONTRACTION	GOBP_NEGATIVE_REGULATION_OF_MUSCLE_CONTRACTION	2/201	25/17872	0.0318665468652753	0.115221708241353	0.0827412094045746	PTGS2/KCNMA1	2
GOBP_POSITIVE_REGULATION_OF_AMYLOID_PRECURSOR_PROTEIN_CATABOLIC_PROCESS	GOBP_POSITIVE_REGULATION_OF_AMYLOID_PRECURSOR_PROTEIN_CATABOLIC_PROCESS	GOBP_POSITIVE_REGULATION_OF_AMYLOID_PRECURSOR_PROTEIN_CATABOLIC_PROCESS	2/201	25/17872	0.0318665468652753	0.115221708241353	0.0827412094045746	TNF/GSAP	2
GOBP_REGULATION_OF_ACTIN_FILAMENT_ORGANIZATION	GOBP_REGULATION_OF_ACTIN_FILAMENT_ORGANIZATION	GOBP_REGULATION_OF_ACTIN_FILAMENT_ORGANIZATION	7/201	268/17872	0.0322314248590382	0.116399927789965	0.0835872939825954	HCK/FMN1/PRKCE/SDC4/SNX9/PLEK/MTSS1	7
GOBP_CELLULAR_KETONE_METABOLIC_PROCESS	GOBP_CELLULAR_KETONE_METABOLIC_PROCESS	GOBP_CELLULAR_KETONE_METABOLIC_PROCESS	6/201	211/17872	0.032310648058528	0.116404182558682	0.0835903493505014	IL1B/PRKCE/ADM/KYNU/PTGS2/EGR1	6
GOBP_MYELOID_LEUKOCYTE_DIFFERENTIATION	GOBP_MYELOID_LEUKOCYTE_DIFFERENTIATION	GOBP_MYELOID_LEUKOCYTE_DIFFERENTIATION	6/201	211/17872	0.032310648058528	0.116404182558682	0.0835903493505014	GPR183/TNF/CCL3/PTPN2/TNFAIP6/TLR4	6
GOBP_OLEFINIC_COMPOUND_METABOLIC_PROCESS	GOBP_OLEFINIC_COMPOUND_METABOLIC_PROCESS	GOBP_OLEFINIC_COMPOUND_METABOLIC_PROCESS	5/201	157/17872	0.0324335186022297	0.116705893836491	0.083807009530236	ALDH1A2/TBXAS1/ADM/PTGS2/EGR1	5
GOBP_EPITHELIAL_TUBE_MORPHOGENESIS	GOBP_EPITHELIAL_TUBE_MORPHOGENESIS	GOBP_EPITHELIAL_TUBE_MORPHOGENESIS	8/201	328/17872	0.0324794540341052	0.116730375161127	0.0838245896758453	CLIC4/AREG/FMN1/TNF/ADM/CSMD1/SDC4/MTSS1	8
GOBP_REGULATION_OF_B_CELL_MEDIATED_IMMUNITY	GOBP_REGULATION_OF_B_CELL_MEDIATED_IMMUNITY	GOBP_REGULATION_OF_B_CELL_MEDIATED_IMMUNITY	3/201	62/17872	0.0326482476691641	0.117195815640333	0.0841588245066171	BCL6/CD55/TNF	3
GOBP_B_CELL_ACTIVATION	GOBP_B_CELL_ACTIVATION	GOBP_B_CELL_ACTIVATION	8/201	329/17872	0.0329808097090093	0.118247302117758	0.0849139015154781	TNFAIP3/PELI1/SAMSN1/KLF6/BCL6/GPR183/PTPN2/TLR4	8
GOBP_REGULATION_OF_ACTIN_FILAMENT_LENGTH	GOBP_REGULATION_OF_ACTIN_FILAMENT_LENGTH	GOBP_REGULATION_OF_ACTIN_FILAMENT_LENGTH	5/201	158/17872	0.0331993833671256	0.118888067928134	0.0853740382284711	HCK/FMN1/PRKCE/SNX9/PLEK	5
GOBP_MAINTENANCE_OF_LOCATION	GOBP_MAINTENANCE_OF_LOCATION	GOBP_MAINTENANCE_OF_LOCATION	8/201	330/17872	0.0334874288301013	0.119775779616537	0.0860115078496227	IL1B/NFKBIA/NFKB1/EHD1/TNF/CCL3/PTPN2/PRKCE	8
GOBP_POSITIVE_REGULATION_OF_GTPASE_ACTIVITY	GOBP_POSITIVE_REGULATION_OF_GTPASE_ACTIVITY	GOBP_POSITIVE_REGULATION_OF_GTPASE_ACTIVITY	7/201	271/17872	0.0339270118732558	0.120130302093925	0.0862660919812752	CCL4/SIPA1L1/RASGEF1B/RAPGEF2/CCL20/CCL3/SNX9	7
GOBP_ACIDIC_AMINO_ACID_TRANSPORT	GOBP_ACIDIC_AMINO_ACID_TRANSPORT	GOBP_ACIDIC_AMINO_ACID_TRANSPORT	3/201	63/17872	0.0340049784665294	0.120130302093925	0.0862660919812752	SLC1A3/TNF/SLC1A2	3
GOBP_INTERLEUKIN_10_PRODUCTION	GOBP_INTERLEUKIN_10_PRODUCTION	GOBP_INTERLEUKIN_10_PRODUCTION	3/201	63/17872	0.0340049784665294	0.120130302093925	0.0862660919812752	STAT3/LILRA5/TLR4	3
GOBP_REGULATION_OF_LYMPHOCYTE_MIGRATION	GOBP_REGULATION_OF_LYMPHOCYTE_MIGRATION	GOBP_REGULATION_OF_LYMPHOCYTE_MIGRATION	3/201	63/17872	0.0340049784665294	0.120130302093925	0.0862660919812752	CCL4/CCL20/CCL3	3
GOBP_SYNCYTIUM_FORMATION	GOBP_SYNCYTIUM_FORMATION	GOBP_SYNCYTIUM_FORMATION	3/201	63/17872	0.0340049784665294	0.120130302093925	0.0862660919812752	CFLAR/SCGB3A1/EHD1	3
GOBP_B_CELL_APOPTOTIC_PROCESS	GOBP_B_CELL_APOPTOTIC_PROCESS	GOBP_B_CELL_APOPTOTIC_PROCESS	2/201	26/17872	0.0342711656325611	0.120130302093925	0.0862660919812752	PTEN/BCL6	2
GOBP_CELL_ADHESION_MOLECULE_PRODUCTION	GOBP_CELL_ADHESION_MOLECULE_PRODUCTION	GOBP_CELL_ADHESION_MOLECULE_PRODUCTION	2/201	26/17872	0.0342711656325611	0.120130302093925	0.0862660919812752	IL1B/CXCL8	2
GOBP_CELLULAR_RESPONSE_TO_DEXAMETHASONE_STIMULUS	GOBP_CELLULAR_RESPONSE_TO_DEXAMETHASONE_STIMULUS	GOBP_CELLULAR_RESPONSE_TO_DEXAMETHASONE_STIMULUS	2/201	26/17872	0.0342711656325611	0.120130302093925	0.0862660919812752	CFLAR/EIF4E	2
GOBP_DENDRITIC_CELL_CHEMOTAXIS	GOBP_DENDRITIC_CELL_CHEMOTAXIS	GOBP_DENDRITIC_CELL_CHEMOTAXIS	2/201	26/17872	0.0342711656325611	0.120130302093925	0.0862660919812752	SLAMF1/GPR183	2
GOBP_INTERLEUKIN_6_MEDIATED_SIGNALING_PATHWAY	GOBP_INTERLEUKIN_6_MEDIATED_SIGNALING_PATHWAY	GOBP_INTERLEUKIN_6_MEDIATED_SIGNALING_PATHWAY	2/201	26/17872	0.0342711656325611	0.120130302093925	0.0862660919812752	PTPN2/STAT3	2
GOBP_NEGATIVE_REGULATION_OF_LIPID_CATABOLIC_PROCESS	GOBP_NEGATIVE_REGULATION_OF_LIPID_CATABOLIC_PROCESS	GOBP_NEGATIVE_REGULATION_OF_LIPID_CATABOLIC_PROCESS	2/201	26/17872	0.0342711656325611	0.120130302093925	0.0862660919812752	IL1B/TNF	2
GOBP_NEGATIVE_REGULATION_OF_PHOSPHOPROTEIN_PHOSPHATASE_ACTIVITY	GOBP_NEGATIVE_REGULATION_OF_PHOSPHOPROTEIN_PHOSPHATASE_ACTIVITY	GOBP_NEGATIVE_REGULATION_OF_PHOSPHOPROTEIN_PHOSPHATASE_ACTIVITY	2/201	26/17872	0.0342711656325611	0.120130302093925	0.0862660919812752	PPP1R15A/TNF	2
GOBP_POSITIVE_REGULATION_OF_FOCAL_ADHESION_ASSEMBLY	GOBP_POSITIVE_REGULATION_OF_FOCAL_ADHESION_ASSEMBLY	GOBP_POSITIVE_REGULATION_OF_FOCAL_ADHESION_ASSEMBLY	2/201	26/17872	0.0342711656325611	0.120130302093925	0.0862660919812752	FMN1/SDC4	2
GOBP_POSITIVE_REGULATION_OF_MEIOTIC_CELL_CYCLE	GOBP_POSITIVE_REGULATION_OF_MEIOTIC_CELL_CYCLE	GOBP_POSITIVE_REGULATION_OF_MEIOTIC_CELL_CYCLE	2/201	26/17872	0.0342711656325611	0.120130302093925	0.0862660919812752	OOEP/INSR	2
GOBP_REGULATION_OF_LIPOPOLYSACCHARIDE_MEDIATED_SIGNALING_PATHWAY	GOBP_REGULATION_OF_LIPOPOLYSACCHARIDE_MEDIATED_SIGNALING_PATHWAY	GOBP_REGULATION_OF_LIPOPOLYSACCHARIDE_MEDIATED_SIGNALING_PATHWAY	2/201	26/17872	0.0342711656325611	0.120130302093925	0.0862660919812752	TNFAIP3/CD55	2
GOBP_REGULATION_OF_LYMPHOCYTE_CHEMOTAXIS	GOBP_REGULATION_OF_LYMPHOCYTE_CHEMOTAXIS	GOBP_REGULATION_OF_LYMPHOCYTE_CHEMOTAXIS	2/201	26/17872	0.0342711656325611	0.120130302093925	0.0862660919812752	CCL4/CCL3	2
GOBP_REGULATION_OF_THE_FORCE_OF_HEART_CONTRACTION	GOBP_REGULATION_OF_THE_FORCE_OF_HEART_CONTRACTION	GOBP_REGULATION_OF_THE_FORCE_OF_HEART_CONTRACTION	2/201	26/17872	0.0342711656325611	0.120130302093925	0.0862660919812752	ATP1A1/ADM	2
GOBP_DEVELOPMENT_OF_PRIMARY_FEMALE_SEXUAL_CHARACTERISTICS	GOBP_DEVELOPMENT_OF_PRIMARY_FEMALE_SEXUAL_CHARACTERISTICS	GOBP_DEVELOPMENT_OF_PRIMARY_FEMALE_SEXUAL_CHARACTERISTICS	4/201	109/17872	0.0346707537635478	0.121246024005467	0.0870672967345219	EREG/INSR/CSMD1/TNFAIP6	4
GOBP_LEUKOCYTE_APOPTOTIC_PROCESS	GOBP_LEUKOCYTE_APOPTOTIC_PROCESS	GOBP_LEUKOCYTE_APOPTOTIC_PROCESS	4/201	109/17872	0.0346707537635478	0.121246024005467	0.0870672967345219	PTEN/BCL6/RAPGEF2/IL2RA	4
GOBP_POSITIVE_CHEMOTAXIS	GOBP_POSITIVE_CHEMOTAXIS	GOBP_POSITIVE_CHEMOTAXIS	3/201	64/17872	0.0353906135824647	0.123185764663352	0.0884602329304375	FPR2/CCL3/CXCL8	3
GOBP_POSITIVE_REGULATION_OF_GLIOGENESIS	GOBP_POSITIVE_REGULATION_OF_GLIOGENESIS	GOBP_POSITIVE_REGULATION_OF_GLIOGENESIS	3/201	64/17872	0.0353906135824647	0.123185764663352	0.0884602329304375	IL1B/TNF/PRKCH	3
GOBP_REGULATION_OF_DENDRITE_MORPHOGENESIS	GOBP_REGULATION_OF_DENDRITE_MORPHOGENESIS	GOBP_REGULATION_OF_DENDRITE_MORPHOGENESIS	3/201	64/17872	0.0353906135824647	0.123185764663352	0.0884602329304375	SIPA1L1/RAPGEF2/IL1RAPL1	3
GOBP_RESPONSE_TO_TYPE_I_INTERFERON	GOBP_RESPONSE_TO_TYPE_I_INTERFERON	GOBP_RESPONSE_TO_TYPE_I_INTERFERON	3/201	64/17872	0.0353906135824647	0.123185764663352	0.0884602329304375	PTPN1/CH25H/PTPN2	3
GOBP_POSITIVE_REGULATION_OF_SYNAPTIC_TRANSMISSION	GOBP_POSITIVE_REGULATION_OF_SYNAPTIC_TRANSMISSION	GOBP_POSITIVE_REGULATION_OF_SYNAPTIC_TRANSMISSION	5/201	161/17872	0.0355643045388013	0.123511340104655	0.088694030069684	PTEN/SLC1A3/TNF/PRKCE/PTGS2	5
GOBP_CELLULAR_RESPONSE_TO_CHEMICAL_STRESS	GOBP_CELLULAR_RESPONSE_TO_CHEMICAL_STRESS	GOBP_CELLULAR_RESPONSE_TO_CHEMICAL_STRESS	8/201	334/17872	0.0355669598222927	0.123511340104655	0.088694030069684	TNFAIP3/SOD2/GCH1/TNF/NFE2L2/PTGS2/TLR4/KDM6B	8
GOBP_SKIN_DEVELOPMENT	GOBP_SKIN_DEVELOPMENT	GOBP_SKIN_DEVELOPMENT	7/201	274/17872	0.035681093528788	0.123763606972529	0.0888751840037743	CLIC4/IL1A/ZFP36/EREG/TNF/SAV1/PRKCH	7
GOBP_CELL_COMMUNICATION_BY_ELECTRICAL_COUPLING_INVOLVED_IN_CARDIAC_CONDUCTION	GOBP_CELL_COMMUNICATION_BY_ELECTRICAL_COUPLING_INVOLVED_IN_CARDIAC_CONDUCTION	GOBP_CELL_COMMUNICATION_BY_ELECTRICAL_COUPLING_INVOLVED_IN_CARDIAC_CONDUCTION	2/201	27/17872	0.0367440827950482	0.125330415735815	0.0900003161855367	ATP1A1/PKP2	2
GOBP_CELLULAR_RESPONSE_TO_COPPER_ION	GOBP_CELLULAR_RESPONSE_TO_COPPER_ION	GOBP_CELLULAR_RESPONSE_TO_COPPER_ION	2/201	27/17872	0.0367440827950482	0.125330415735815	0.0900003161855367	NFE2L2/MT2A	2
GOBP_EXPLORATION_BEHAVIOR	GOBP_EXPLORATION_BEHAVIOR	GOBP_EXPLORATION_BEHAVIOR	2/201	27/17872	0.0367440827950482	0.125330415735815	0.0900003161855367	PRKCE/ABL2	2
GOBP_NEGATIVE_REGULATION_OF_BLOOD_CIRCULATION	GOBP_NEGATIVE_REGULATION_OF_BLOOD_CIRCULATION	GOBP_NEGATIVE_REGULATION_OF_BLOOD_CIRCULATION	2/201	27/17872	0.0367440827950482	0.125330415735815	0.0900003161855367	ATP1A1/TNF	2
GOBP_NEGATIVE_REGULATION_OF_CELL_AGING	GOBP_NEGATIVE_REGULATION_OF_CELL_AGING	GOBP_NEGATIVE_REGULATION_OF_CELL_AGING	2/201	27/17872	0.0367440827950482	0.125330415735815	0.0900003161855367	PTEN/BCL6	2
GOBP_NEGATIVE_REGULATION_OF_RESPONSE_TO_OXIDATIVE_STRESS	GOBP_NEGATIVE_REGULATION_OF_RESPONSE_TO_OXIDATIVE_STRESS	GOBP_NEGATIVE_REGULATION_OF_RESPONSE_TO_OXIDATIVE_STRESS	2/201	27/17872	0.0367440827950482	0.125330415735815	0.0900003161855367	MCTP1/NFE2L2	2
GOBP_NITRIC_OXIDE_MEDIATED_SIGNAL_TRANSDUCTION	GOBP_NITRIC_OXIDE_MEDIATED_SIGNAL_TRANSDUCTION	GOBP_NITRIC_OXIDE_MEDIATED_SIGNAL_TRANSDUCTION	2/201	27/17872	0.0367440827950482	0.125330415735815	0.0900003161855367	THBS1/FPR1	2
GOBP_POLYOL_CATABOLIC_PROCESS	GOBP_POLYOL_CATABOLIC_PROCESS	GOBP_POLYOL_CATABOLIC_PROCESS	2/201	27/17872	0.0367440827950482	0.125330415735815	0.0900003161855367	PTEN/GK	2
GOBP_POSITIVE_REGULATION_OF_HEART_RATE	GOBP_POSITIVE_REGULATION_OF_HEART_RATE	GOBP_POSITIVE_REGULATION_OF_HEART_RATE	2/201	27/17872	0.0367440827950482	0.125330415735815	0.0900003161855367	GCH1/ADM	2
GOBP_POSITIVE_REGULATION_OF_LIPID_STORAGE	GOBP_POSITIVE_REGULATION_OF_LIPID_STORAGE	GOBP_POSITIVE_REGULATION_OF_LIPID_STORAGE	2/201	27/17872	0.0367440827950482	0.125330415735815	0.0900003161855367	NFKB1/EHD1	2
GOBP_REGULATION_OF_MACROPHAGE_CHEMOTAXIS	GOBP_REGULATION_OF_MACROPHAGE_CHEMOTAXIS	GOBP_REGULATION_OF_MACROPHAGE_CHEMOTAXIS	2/201	27/17872	0.0367440827950482	0.125330415735815	0.0900003161855367	THBS1/SLAMF1	2
GOBP_REGULATION_OF_TOLL_LIKE_RECEPTOR_4_SIGNALING_PATHWAY	GOBP_REGULATION_OF_TOLL_LIKE_RECEPTOR_4_SIGNALING_PATHWAY	GOBP_REGULATION_OF_TOLL_LIKE_RECEPTOR_4_SIGNALING_PATHWAY	2/201	27/17872	0.0367440827950482	0.125330415735815	0.0900003161855367	TNFAIP3/PELI1	2
GOBP_EXCRETION	GOBP_EXCRETION	GOBP_EXCRETION	3/201	65/17872	0.0368050433069305	0.125330415735815	0.0900003161855367	AQP9/NFAT5/KCNMA1	3
GOBP_GLUTATHIONE_METABOLIC_PROCESS	GOBP_GLUTATHIONE_METABOLIC_PROCESS	GOBP_GLUTATHIONE_METABOLIC_PROCESS	3/201	65/17872	0.0368050433069305	0.125330415735815	0.0900003161855367	SOD2/NFE2L2/SLC1A2	3
GOBP_LYMPHOCYTE_HOMEOSTASIS	GOBP_LYMPHOCYTE_HOMEOSTASIS	GOBP_LYMPHOCYTE_HOMEOSTASIS	3/201	65/17872	0.0368050433069305	0.125330415735815	0.0900003161855367	TNFAIP3/PMAIP1/IL2RA	3
GOBP_SKELETAL_MUSCLE_CELL_DIFFERENTIATION	GOBP_SKELETAL_MUSCLE_CELL_DIFFERENTIATION	GOBP_SKELETAL_MUSCLE_CELL_DIFFERENTIATION	3/201	65/17872	0.0368050433069305	0.125330415735815	0.0900003161855367	BTG2/MAFF/EGR1	3
GOBP_REGULATION_OF_PROTEIN_CONTAINING_COMPLEX_ASSEMBLY	GOBP_REGULATION_OF_PROTEIN_CONTAINING_COMPLEX_ASSEMBLY	GOBP_REGULATION_OF_PROTEIN_CONTAINING_COMPLEX_ASSEMBLY	9/201	401/17872	0.0379830854845269	0.129194462942239	0.0927751052763756	HCK/FMN1/TNF/PRKCE/SNX9/PLEK/TLR4/MEFV/LDLRAD4	9
GOBP_NEGATIVE_REGULATION_OF_CELL_SUBSTRATE_ADHESION	GOBP_NEGATIVE_REGULATION_OF_CELL_SUBSTRATE_ADHESION	GOBP_NEGATIVE_REGULATION_OF_CELL_SUBSTRATE_ADHESION	3/201	66/17872	0.0382481489218775	0.129932771320125	0.0933052877309856	THBS1/PTEN/BCL6	3
GOBP_PROTEIN_LOCALIZATION_TO_CELL_PERIPHERY	GOBP_PROTEIN_LOCALIZATION_TO_CELL_PERIPHERY	GOBP_PROTEIN_LOCALIZATION_TO_CELL_PERIPHERY	8/201	339/17872	0.038287263154673	0.129932771320125	0.0933052877309856	KCNIP4/EHD1/RAPGEF2/TNF/RILPL2/PRKCE/PKP2/PRKCH	8
GOBP_NEGATIVE_REGULATION_OF_RESPONSE_TO_BIOTIC_STIMULUS	GOBP_NEGATIVE_REGULATION_OF_RESPONSE_TO_BIOTIC_STIMULUS	GOBP_NEGATIVE_REGULATION_OF_RESPONSE_TO_BIOTIC_STIMULUS	4/201	113/17872	0.0387838203588278	0.131468336511799	0.0944079837681993	TNFAIP3/IRAK3/SERPINB9/PTPN2	4
GOBP_C4_DICARBOXYLATE_TRANSPORT	GOBP_C4_DICARBOXYLATE_TRANSPORT	GOBP_C4_DICARBOXYLATE_TRANSPORT	2/201	28/17872	0.0392834745633299	0.131665847890352	0.0945498175474587	SLC1A3/SLC1A2	2
GOBP_NEGATIVE_REGULATION_OF_INTERLEUKIN_2_PRODUCTION	GOBP_NEGATIVE_REGULATION_OF_INTERLEUKIN_2_PRODUCTION	GOBP_NEGATIVE_REGULATION_OF_INTERLEUKIN_2_PRODUCTION	2/201	28/17872	0.0392834745633299	0.131665847890352	0.0945498175474587	TNFAIP3/ZFP36	2
GOBP_NEGATIVE_REGULATION_OF_PROTEIN_MATURATION	GOBP_NEGATIVE_REGULATION_OF_PROTEIN_MATURATION	GOBP_NEGATIVE_REGULATION_OF_PROTEIN_MATURATION	2/201	28/17872	0.0392834745633299	0.131665847890352	0.0945498175474587	IL1R2/THBS1	2
GOBP_NUCLEAR_TRANSCRIBED_MRNA_POLY_A_TAIL_SHORTENING	GOBP_NUCLEAR_TRANSCRIBED_MRNA_POLY_A_TAIL_SHORTENING	GOBP_NUCLEAR_TRANSCRIBED_MRNA_POLY_A_TAIL_SHORTENING	2/201	28/17872	0.0392834745633299	0.131665847890352	0.0945498175474587	ZFP36/BTG2	2
GOBP_POSITIVE_REGULATION_OF_ACTIVATED_T_CELL_PROLIFERATION	GOBP_POSITIVE_REGULATION_OF_ACTIVATED_T_CELL_PROLIFERATION	GOBP_POSITIVE_REGULATION_OF_ACTIVATED_T_CELL_PROLIFERATION	2/201	28/17872	0.0392834745633299	0.131665847890352	0.0945498175474587	SLAMF1/IL2RA	2
GOBP_POSITIVE_REGULATION_OF_LIPID_CATABOLIC_PROCESS	GOBP_POSITIVE_REGULATION_OF_LIPID_CATABOLIC_PROCESS	GOBP_POSITIVE_REGULATION_OF_LIPID_CATABOLIC_PROCESS	2/201	28/17872	0.0392834745633299	0.131665847890352	0.0945498175474587	IL1B/PRKCE	2
GOBP_PYRIDINE_NUCLEOTIDE_BIOSYNTHETIC_PROCESS	GOBP_PYRIDINE_NUCLEOTIDE_BIOSYNTHETIC_PROCESS	GOBP_PYRIDINE_NUCLEOTIDE_BIOSYNTHETIC_PROCESS	2/201	28/17872	0.0392834745633299	0.131665847890352	0.0945498175474587	KYNU/NAMPT	2
GOBP_REGULATION_OF_MONOCYTE_CHEMOTAXIS	GOBP_REGULATION_OF_MONOCYTE_CHEMOTAXIS	GOBP_REGULATION_OF_MONOCYTE_CHEMOTAXIS	2/201	28/17872	0.0392834745633299	0.131665847890352	0.0945498175474587	FPR2/DUSP1	2
GOBP_T_CELL_CHEMOTAXIS	GOBP_T_CELL_CHEMOTAXIS	GOBP_T_CELL_CHEMOTAXIS	2/201	28/17872	0.0392834745633299	0.131665847890352	0.0945498175474587	GPR183/CCL3	2
GOBP_T_HELPER_17_CELL_DIFFERENTIATION	GOBP_T_HELPER_17_CELL_DIFFERENTIATION	GOBP_T_HELPER_17_CELL_DIFFERENTIATION	2/201	28/17872	0.0392834745633299	0.131665847890352	0.0945498175474587	NFKBIZ/STAT3	2
GOBP_CELLULAR_RESPONSE_TO_HEAT	GOBP_CELLULAR_RESPONSE_TO_HEAT	GOBP_CELLULAR_RESPONSE_TO_HEAT	3/201	67/17872	0.0397198030009862	0.132130418556567	0.0948834277617425	IL1A/THBS1/PTGS2	3
GOBP_CELLULAR_RESPONSE_TO_RETINOIC_ACID	GOBP_CELLULAR_RESPONSE_TO_RETINOIC_ACID	GOBP_CELLULAR_RESPONSE_TO_RETINOIC_ACID	3/201	67/17872	0.0397198030009862	0.132130418556567	0.0948834277617425	ALDH1A2/TNF/ABL2	3
GOBP_GLOMERULUS_DEVELOPMENT	GOBP_GLOMERULUS_DEVELOPMENT	GOBP_GLOMERULUS_DEVELOPMENT	3/201	67/17872	0.0397198030009862	0.132130418556567	0.0948834277617425	CFLAR/MTSS1/EGR1	3
GOBP_L_ALPHA_AMINO_ACID_TRANSMEMBRANE_TRANSPORT	GOBP_L_ALPHA_AMINO_ACID_TRANSMEMBRANE_TRANSPORT	GOBP_L_ALPHA_AMINO_ACID_TRANSMEMBRANE_TRANSPORT	3/201	67/17872	0.0397198030009862	0.132130418556567	0.0948834277617425	SLC1A3/TNF/SLC1A2	3
GOBP_POSITIVE_REGULATION_OF_PROTEIN_LOCALIZATION_TO_CELL_PERIPHERY	GOBP_POSITIVE_REGULATION_OF_PROTEIN_LOCALIZATION_TO_CELL_PERIPHERY	GOBP_POSITIVE_REGULATION_OF_PROTEIN_LOCALIZATION_TO_CELL_PERIPHERY	3/201	67/17872	0.0397198030009862	0.132130418556567	0.0948834277617425	TNF/PRKCE/PRKCH	3
GOBP_REGULATION_OF_CELLULAR_RESPONSE_TO_INSULIN_STIMULUS	GOBP_REGULATION_OF_CELLULAR_RESPONSE_TO_INSULIN_STIMULUS	GOBP_REGULATION_OF_CELLULAR_RESPONSE_TO_INSULIN_STIMULUS	3/201	67/17872	0.0397198030009862	0.132130418556567	0.0948834277617425	IL1B/PTPN1/PTPN2	3
GOBP_ACTIN_FILAMENT_POLYMERIZATION	GOBP_ACTIN_FILAMENT_POLYMERIZATION	GOBP_ACTIN_FILAMENT_POLYMERIZATION	5/201	166/17872	0.0397321439642107	0.132130418556567	0.0948834277617425	HCK/FMN1/PRKCE/SNX9/GAS7	5
GOBP_POSITIVE_REGULATION_OF_CELLULAR_AMIDE_METABOLIC_PROCESS	GOBP_POSITIVE_REGULATION_OF_CELLULAR_AMIDE_METABOLIC_PROCESS	GOBP_POSITIVE_REGULATION_OF_CELLULAR_AMIDE_METABOLIC_PROCESS	5/201	167/17872	0.0405999046313807	0.134865830195332	0.0968477387467585	THBS1/PPP1R15A/TNF/NFE2L2/GSAP	5
GOBP_NEGATIVE_REGULATION_OF_CARDIAC_MUSCLE_TISSUE_GROWTH	GOBP_NEGATIVE_REGULATION_OF_CARDIAC_MUSCLE_TISSUE_GROWTH	GOBP_NEGATIVE_REGULATION_OF_CARDIAC_MUSCLE_TISSUE_GROWTH	2/201	29/17872	0.0418875491709109	0.138372712266697	0.099366046001986	PTEN/SAV1	2
GOBP_REGULATION_OF_OXIDATIVE_STRESS_INDUCED_INTRINSIC_APOPTOTIC_SIGNALING_PATHWAY	GOBP_REGULATION_OF_OXIDATIVE_STRESS_INDUCED_INTRINSIC_APOPTOTIC_SIGNALING_PATHWAY	GOBP_REGULATION_OF_OXIDATIVE_STRESS_INDUCED_INTRINSIC_APOPTOTIC_SIGNALING_PATHWAY	2/201	29/17872	0.0418875491709109	0.138372712266697	0.099366046001986	SOD2/NFE2L2	2
GOBP_REGULATION_OF_T_HELPER_1_TYPE_IMMUNE_RESPONSE	GOBP_REGULATION_OF_T_HELPER_1_TYPE_IMMUNE_RESPONSE	GOBP_REGULATION_OF_T_HELPER_1_TYPE_IMMUNE_RESPONSE	2/201	29/17872	0.0418875491709109	0.138372712266697	0.099366046001986	IL1B/SLAMF1	2
GOBP_RESPONSE_TO_PAIN	GOBP_RESPONSE_TO_PAIN	GOBP_RESPONSE_TO_PAIN	2/201	29/17872	0.0418875491709109	0.138372712266697	0.099366046001986	GCH1/THBS1	2
GOBP_RESPONSE_TO_THYROID_HORMONE	GOBP_RESPONSE_TO_THYROID_HORMONE	GOBP_RESPONSE_TO_THYROID_HORMONE	2/201	29/17872	0.0418875491709109	0.138372712266697	0.099366046001986	KLF9/CTSB	2
GOBP_POLYOL_METABOLIC_PROCESS	GOBP_POLYOL_METABOLIC_PROCESS	GOBP_POLYOL_METABOLIC_PROCESS	4/201	116/17872	0.0420441627993711	0.138736435431996	0.0996272371876109	GCH1/PTEN/GK/PLEK	4
GOBP_L_AMINO_ACID_TRANSPORT	GOBP_L_AMINO_ACID_TRANSPORT	GOBP_L_AMINO_ACID_TRANSPORT	3/201	69/17872	0.0427482050584033	0.140748229237546	0.101071915061985	SLC1A3/TNF/SLC1A2	3
GOBP_MAST_CELL_ACTIVATION	GOBP_MAST_CELL_ACTIVATION	GOBP_MAST_CELL_ACTIVATION	3/201	69/17872	0.0427482050584033	0.140748229237546	0.101071915061985	LCP2/RHOH/ADGRE2	3
GOBP_MONOCARBOXYLIC_ACID_TRANSPORT	GOBP_MONOCARBOXYLIC_ACID_TRANSPORT	GOBP_MONOCARBOXYLIC_ACID_TRANSPORT	4/201	117/17872	0.0431644017964879	0.14196186390179	0.101943431388444	IL1B/IL1A/AQP9/TNF	4
GOBP_SIGNAL_TRANSDUCTION_BY_P53_CLASS_MEDIATOR	GOBP_SIGNAL_TRANSDUCTION_BY_P53_CLASS_MEDIATOR	GOBP_SIGNAL_TRANSDUCTION_BY_P53_CLASS_MEDIATOR	5/201	171/17872	0.0441856705645264	0.14493589082109	0.104079093043357	PMAIP1/CD44/TP53BP2/HIPK2/PLK3	5
GOBP_FC_GAMMA_RECEPTOR_SIGNALING_PATHWAY	GOBP_FC_GAMMA_RECEPTOR_SIGNALING_PATHWAY	GOBP_FC_GAMMA_RECEPTOR_SIGNALING_PATHWAY	2/201	30/17872	0.0445545463905261	0.14493589082109	0.104079093043357	HCK/PRKCE	2
GOBP_MAMMARY_GLAND_DUCT_MORPHOGENESIS	GOBP_MAMMARY_GLAND_DUCT_MORPHOGENESIS	GOBP_MAMMARY_GLAND_DUCT_MORPHOGENESIS	2/201	30/17872	0.0445545463905261	0.14493589082109	0.104079093043357	AREG/CSMD1	2
GOBP_MEMBRANE_REPOLARIZATION_DURING_ACTION_POTENTIAL	GOBP_MEMBRANE_REPOLARIZATION_DURING_ACTION_POTENTIAL	GOBP_MEMBRANE_REPOLARIZATION_DURING_ACTION_POTENTIAL	2/201	30/17872	0.0445545463905261	0.14493589082109	0.104079093043357	ATP1A1/KCNJ2	2
GOBP_NEGATIVE_REGULATION_OF_ATP_METABOLIC_PROCESS	GOBP_NEGATIVE_REGULATION_OF_ATP_METABOLIC_PROCESS	GOBP_NEGATIVE_REGULATION_OF_ATP_METABOLIC_PROCESS	2/201	30/17872	0.0445545463905261	0.14493589082109	0.104079093043357	TNF/STAT3	2
GOBP_NEGATIVE_REGULATION_OF_STEROID_METABOLIC_PROCESS	GOBP_NEGATIVE_REGULATION_OF_STEROID_METABOLIC_PROCESS	GOBP_NEGATIVE_REGULATION_OF_STEROID_METABOLIC_PROCESS	2/201	30/17872	0.0445545463905261	0.14493589082109	0.104079093043357	NFKB1/ATP1A1	2
GOBP_POSITIVE_REGULATION_OF_TRANSLATIONAL_INITIATION	GOBP_POSITIVE_REGULATION_OF_TRANSLATIONAL_INITIATION	GOBP_POSITIVE_REGULATION_OF_TRANSLATIONAL_INITIATION	2/201	30/17872	0.0445545463905261	0.14493589082109	0.104079093043357	PPP1R15A/TNF	2
GOBP_REGULATION_OF_EPIDERMAL_GROWTH_FACTOR_ACTIVATED_RECEPTOR_ACTIVITY	GOBP_REGULATION_OF_EPIDERMAL_GROWTH_FACTOR_ACTIVATED_RECEPTOR_ACTIVITY	GOBP_REGULATION_OF_EPIDERMAL_GROWTH_FACTOR_ACTIVATED_RECEPTOR_ACTIVITY	2/201	30/17872	0.0445545463905261	0.14493589082109	0.104079093043357	AREG/EREG	2
GOBP_RENAL_SYSTEM_VASCULATURE_DEVELOPMENT	GOBP_RENAL_SYSTEM_VASCULATURE_DEVELOPMENT	GOBP_RENAL_SYSTEM_VASCULATURE_DEVELOPMENT	2/201	30/17872	0.0445545463905261	0.14493589082109	0.104079093043357	CFLAR/EGR1	2
GOBP_RESPONSE_TO_ATP	GOBP_RESPONSE_TO_ATP	GOBP_RESPONSE_TO_ATP	2/201	30/17872	0.0445545463905261	0.14493589082109	0.104079093043357	IL1B/PTGS2	2
GOBP_REGULATION_OF_CELLULAR_COMPONENT_SIZE	GOBP_REGULATION_OF_CELLULAR_COMPONENT_SIZE	GOBP_REGULATION_OF_CELLULAR_COMPONENT_SIZE	8/201	350/17872	0.0447557076113275	0.145431672989749	0.104435116373181	HCK/PPP1R15A/FMN1/PTEN/PRKCE/SNX9/KCNMA1/PLEK	8
GOBP_POSITIVE_REGULATION_OF_CALCIUM_ION_TRANSPORT	GOBP_POSITIVE_REGULATION_OF_CALCIUM_ION_TRANSPORT	GOBP_POSITIVE_REGULATION_OF_CALCIUM_ION_TRANSPORT	4/201	119/17872	0.0454550413424531	0.147383030787541	0.105836394887748	CCL4/CCL3/LILRA5/VMP1	4
GOBP_POSITIVE_REGULATION_OF_PROTEIN_KINASE_B_SIGNALING	GOBP_POSITIVE_REGULATION_OF_PROTEIN_KINASE_B_SIGNALING	GOBP_POSITIVE_REGULATION_OF_PROTEIN_KINASE_B_SIGNALING	4/201	119/17872	0.0454550413424531	0.147383030787541	0.105836394887748	THBS1/INSR/TNF/CCL3	4
GOBP_NEGATIVE_REGULATION_OF_SYNAPTIC_TRANSMISSION	GOBP_NEGATIVE_REGULATION_OF_SYNAPTIC_TRANSMISSION	GOBP_NEGATIVE_REGULATION_OF_SYNAPTIC_TRANSMISSION	3/201	71/17872	0.0458890668902296	0.148306702636571	0.106499687656517	IL1B/PTEN/PTGS2	3
GOBP_OVULATION_CYCLE	GOBP_OVULATION_CYCLE	GOBP_OVULATION_CYCLE	3/201	71/17872	0.0458890668902296	0.148306702636571	0.106499687656517	EREG/TNFAIP6/EGR1	3
GOBP_POSITIVE_REGULATION_OF_PHAGOCYTOSIS	GOBP_POSITIVE_REGULATION_OF_PHAGOCYTOSIS	GOBP_POSITIVE_REGULATION_OF_PHAGOCYTOSIS	3/201	71/17872	0.0458890668902296	0.148306702636571	0.106499687656517	IL1B/FPR2/TNF	3
GOBP_REGULATION_OF_CYTOSOLIC_CALCIUM_ION_CONCENTRATION	GOBP_REGULATION_OF_CYTOSOLIC_CALCIUM_ION_CONCENTRATION	GOBP_REGULATION_OF_CYTOSOLIC_CALCIUM_ION_CONCENTRATION	8/201	352/17872	0.0460045834164824	0.148343406735789	0.10652604502967	FPR2/CD55/CCL3/PRKCE/ADM/CCRL2/FPR1/ABL2	8
GOBP_REGULATION_OF_SIGNALING_RECEPTOR_ACTIVITY	GOBP_REGULATION_OF_SIGNALING_RECEPTOR_ACTIVITY	GOBP_REGULATION_OF_SIGNALING_RECEPTOR_ACTIVITY	5/201	173/17872	0.0460476365558944	0.148343406735789	0.10652604502967	DLGAP1/AREG/EREG/IFNGR2/TNF	5
GOBP_AMIDE_TRANSPORT	GOBP_AMIDE_TRANSPORT	GOBP_AMIDE_TRANSPORT	7/201	290/17872	0.0460496126843247	0.148343406735789	0.10652604502967	IL1B/AQP9/IL1RN/ENSA/TNF/PRKCE/KLF7	7
GOBP_RESPONSE_TO_ETHANOL	GOBP_RESPONSE_TO_ETHANOL	GOBP_RESPONSE_TO_ETHANOL	4/201	120/17872	0.0466254219502137	0.149809801399218	0.107579069409957	SOD2/TBXAS1/TNF/PRKCE	4
GOBP_UROGENITAL_SYSTEM_DEVELOPMENT	GOBP_UROGENITAL_SYSTEM_DEVELOPMENT	GOBP_UROGENITAL_SYSTEM_DEVELOPMENT	8/201	353/17872	0.0466375295424394	0.149809801399218	0.107579069409957	ALDH1A2/ZBTB16/CFLAR/FMN1/PTEN/SDC4/MTSS1/EGR1	8
GOBP_DEFENSE_RESPONSE_TO_SYMBIONT	GOBP_DEFENSE_RESPONSE_TO_SYMBIONT	GOBP_DEFENSE_RESPONSE_TO_SYMBIONT	7/201	291/17872	0.0467554585499224	0.149809801399218	0.107579069409957	IL1B/TNFAIP3/PMAIP1/BIRC3/IFNGR2/ISG20/IRF1	7
GOBP_REGULATION_OF_EPITHELIAL_CELL_MIGRATION	GOBP_REGULATION_OF_EPITHELIAL_CELL_MIGRATION	GOBP_REGULATION_OF_EPITHELIAL_CELL_MIGRATION	7/201	291/17872	0.0467554585499224	0.149809801399218	0.107579069409957	THBS1/PTEN/RIN2/TNF/PRKCE/NFE2L2/PTGS2	7
GOBP_DENDRITE_DEVELOPMENT	GOBP_DENDRITE_DEVELOPMENT	GOBP_DENDRITE_DEVELOPMENT	6/201	231/17872	0.0467559252774628	0.149809801399218	0.107579069409957	SIPA1L1/PTEN/RBFOX2/RAPGEF2/IL1RAPL1/KLF7	6
GOBP_REGULATION_OF_ION_TRANSMEMBRANE_TRANSPORT	GOBP_REGULATION_OF_ION_TRANSMEMBRANE_TRANSPORT	GOBP_REGULATION_OF_ION_TRANSMEMBRANE_TRANSPORT	10/201	483/17872	0.046942473853392	0.150246136807584	0.107892403762879	CLIC4/PDE4B/KCNIP4/SESTD1/IFNGR2/TNF/PRKCE/KCNJ2/KCNMA1/VMP1	10
GOBP_ANGIOGENESIS_INVOLVED_IN_WOUND_HEALING	GOBP_ANGIOGENESIS_INVOLVED_IN_WOUND_HEALING	GOBP_ANGIOGENESIS_INVOLVED_IN_WOUND_HEALING	2/201	31/17872	0.0472827370572021	0.150367169127541	0.107979317597807	TNFAIP3/TNF	2
GOBP_NEGATIVE_REGULATION_OF_STRIATED_MUSCLE_CELL_APOPTOTIC_PROCESS	GOBP_NEGATIVE_REGULATION_OF_STRIATED_MUSCLE_CELL_APOPTOTIC_PROCESS	GOBP_NEGATIVE_REGULATION_OF_STRIATED_MUSCLE_CELL_APOPTOTIC_PROCESS	2/201	31/17872	0.0472827370572021	0.150367169127541	0.107979317597807	CFLAR/NFE2L2	2
GOBP_POSITIVE_REGULATION_OF_CELL_SUBSTRATE_JUNCTION_ORGANIZATION	GOBP_POSITIVE_REGULATION_OF_CELL_SUBSTRATE_JUNCTION_ORGANIZATION	GOBP_POSITIVE_REGULATION_OF_CELL_SUBSTRATE_JUNCTION_ORGANIZATION	2/201	31/17872	0.0472827370572021	0.150367169127541	0.107979317597807	FMN1/SDC4	2
GOBP_POSITIVE_REGULATION_OF_POSTTRANSCRIPTIONAL_GENE_SILENCING	GOBP_POSITIVE_REGULATION_OF_POSTTRANSCRIPTIONAL_GENE_SILENCING	GOBP_POSITIVE_REGULATION_OF_POSTTRANSCRIPTIONAL_GENE_SILENCING	2/201	31/17872	0.0472827370572021	0.150367169127541	0.107979317597807	ZFP36/STAT3	2
GOBP_PYRIDINE_CONTAINING_COMPOUND_BIOSYNTHETIC_PROCESS	GOBP_PYRIDINE_CONTAINING_COMPOUND_BIOSYNTHETIC_PROCESS	GOBP_PYRIDINE_CONTAINING_COMPOUND_BIOSYNTHETIC_PROCESS	2/201	31/17872	0.0472827370572021	0.150367169127541	0.107979317597807	KYNU/NAMPT	2
GOBP_RESPONSE_TO_PROSTAGLANDIN	GOBP_RESPONSE_TO_PROSTAGLANDIN	GOBP_RESPONSE_TO_PROSTAGLANDIN	2/201	31/17872	0.0472827370572021	0.150367169127541	0.107979317597807	PRKCE/GNG2	2
GOBP_POSITIVE_REGULATION_OF_RESPONSE_TO_WOUNDING	GOBP_POSITIVE_REGULATION_OF_RESPONSE_TO_WOUNDING	GOBP_POSITIVE_REGULATION_OF_RESPONSE_TO_WOUNDING	3/201	72/17872	0.0475012672835259	0.150740723730593	0.108247568781607	THBS1/PRKCE/NFE2L2	3
GOBP_STRIATED_MUSCLE_CELL_PROLIFERATION	GOBP_STRIATED_MUSCLE_CELL_PROLIFERATION	GOBP_STRIATED_MUSCLE_CELL_PROLIFERATION	3/201	72/17872	0.0475012672835259	0.150740723730593	0.108247568781607	CFLAR/PTEN/SAV1	3
GOBP_POSITIVE_REGULATION_OF_EPITHELIAL_CELL_MIGRATION	GOBP_POSITIVE_REGULATION_OF_EPITHELIAL_CELL_MIGRATION	GOBP_POSITIVE_REGULATION_OF_EPITHELIAL_CELL_MIGRATION	5/201	175/17872	0.0479558108901973	0.152021449400062	0.109167263450474	THBS1/RIN2/PRKCE/NFE2L2/PTGS2	5
GOBP_HORMONE_TRANSPORT	GOBP_HORMONE_TRANSPORT	GOBP_HORMONE_TRANSPORT	7/201	293/17872	0.0481878870817989	0.15259497575903	0.10957911522121	IL1B/IL1RN/ENSA/TNF/PRKCE/ADM/KLF7	7
GOBP_ERBB_SIGNALING_PATHWAY	GOBP_ERBB_SIGNALING_PATHWAY	GOBP_ERBB_SIGNALING_PATHWAY	4/201	122/17872	0.0490162311394792	0.154725309512239	0.111108917147135	AREG/EREG/PTPN2/PTPN12	4
GOBP_MEMORY	GOBP_MEMORY	GOBP_MEMORY	4/201	122/17872	0.0490162311394792	0.154725309512239	0.111108917147135	INSR/LDLR/CSMD1/PTGS2	4
GOBP_POSITIVE_REGULATION_OF_CELL_SUBSTRATE_ADHESION	GOBP_POSITIVE_REGULATION_OF_CELL_SUBSTRATE_ADHESION	GOBP_POSITIVE_REGULATION_OF_CELL_SUBSTRATE_ADHESION	4/201	122/17872	0.0490162311394792	0.154725309512239	0.111108917147135	FMN1/RIN2/PRKCE/SDC4	4
GOBP_NEGATIVE_REGULATION_OF_SMOOTH_MUSCLE_CELL_PROLIFERATION	GOBP_NEGATIVE_REGULATION_OF_SMOOTH_MUSCLE_CELL_PROLIFERATION	GOBP_NEGATIVE_REGULATION_OF_SMOOTH_MUSCLE_CELL_PROLIFERATION	3/201	73/17872	0.0491410846954375	0.154791822224382	0.111156680214767	TNFAIP3/SOD2/PTEN	3
GOBP_SMOOTH_MUSCLE_CELL_DIFFERENTIATION	GOBP_SMOOTH_MUSCLE_CELL_DIFFERENTIATION	GOBP_SMOOTH_MUSCLE_CELL_DIFFERENTIATION	3/201	73/17872	0.0491410846954375	0.154791822224382	0.111156680214767	SOD2/EREG/ADM	3
GOBP_CARDIAC_MUSCLE_TISSUE_DEVELOPMENT	GOBP_CARDIAC_MUSCLE_TISSUE_DEVELOPMENT	GOBP_CARDIAC_MUSCLE_TISSUE_DEVELOPMENT	6/201	234/17872	0.0492189293027864	0.154873487458029	0.11121532437394	ALDH1A2/PTEN/AKAP13/KDM6B/SAV1/PKP2	6
GOBP_REGULATED_EXOCYTOSIS	GOBP_REGULATED_EXOCYTOSIS	GOBP_REGULATED_EXOCYTOSIS	6/201	235/17872	0.0500573977304594	0.156234383483003	0.11219258972349	HCK/ADGRE2/CCL3/SYN1/STX11/PLEK	6
GOBP_ANIMAL_ORGAN_MATURATION	GOBP_ANIMAL_ORGAN_MATURATION	GOBP_ANIMAL_ORGAN_MATURATION	2/201	32/17872	0.0500704225979722	0.156234383483003	0.11219258972349	ALDH1A2/ZBTB16	2
GOBP_NEGATIVE_REGULATION_OF_ERBB_SIGNALING_PATHWAY	GOBP_NEGATIVE_REGULATION_OF_ERBB_SIGNALING_PATHWAY	GOBP_NEGATIVE_REGULATION_OF_ERBB_SIGNALING_PATHWAY	2/201	32/17872	0.0500704225979722	0.156234383483003	0.11219258972349	PTPN2/PTPN12	2
GOBP_POSITIVE_REGULATION_OF_CD4_POSITIVE_ALPHA_BETA_T_CELL_DIFFERENTIATION	GOBP_POSITIVE_REGULATION_OF_CD4_POSITIVE_ALPHA_BETA_T_CELL_DIFFERENTIATION	GOBP_POSITIVE_REGULATION_OF_CD4_POSITIVE_ALPHA_BETA_T_CELL_DIFFERENTIATION	2/201	32/17872	0.0500704225979722	0.156234383483003	0.11219258972349	NLRP3/NFKBIZ	2
GOBP_POSITIVE_REGULATION_OF_NEUTROPHIL_MIGRATION	GOBP_POSITIVE_REGULATION_OF_NEUTROPHIL_MIGRATION	GOBP_POSITIVE_REGULATION_OF_NEUTROPHIL_MIGRATION	2/201	32/17872	0.0500704225979722	0.156234383483003	0.11219258972349	IL1A/CXCL8	2
GOBP_POSITIVE_REGULATION_OF_P38MAPK_CASCADE	GOBP_POSITIVE_REGULATION_OF_P38MAPK_CASCADE	GOBP_POSITIVE_REGULATION_OF_P38MAPK_CASCADE	2/201	32/17872	0.0500704225979722	0.156234383483003	0.11219258972349	IL1B/GADD45B	2
GOBP_PYRIDINE_NUCLEOTIDE_METABOLIC_PROCESS	GOBP_PYRIDINE_NUCLEOTIDE_METABOLIC_PROCESS	GOBP_PYRIDINE_NUCLEOTIDE_METABOLIC_PROCESS	2/201	32/17872	0.0500704225979722	0.156234383483003	0.11219258972349	KYNU/NAMPT	2
GOBP_REGULATION_OF_VASCULAR_ENDOTHELIAL_GROWTH_FACTOR_RECEPTOR_SIGNALING_PATHWAY	GOBP_REGULATION_OF_VASCULAR_ENDOTHELIAL_GROWTH_FACTOR_RECEPTOR_SIGNALING_PATHWAY	GOBP_REGULATION_OF_VASCULAR_ENDOTHELIAL_GROWTH_FACTOR_RECEPTOR_SIGNALING_PATHWAY	2/201	32/17872	0.0500704225979722	0.156234383483003	0.11219258972349	IL1B/PTPN1	2
GOBP_ANTIMICROBIAL_HUMORAL_RESPONSE	GOBP_ANTIMICROBIAL_HUMORAL_RESPONSE	GOBP_ANTIMICROBIAL_HUMORAL_RESPONSE	4/201	123/17872	0.0502366208685315	0.15642572030358	0.112329989525834	CXCL2/CXCL3/RPL30/CXCL8	4
GOBP_HEMATOPOIETIC_PROGENITOR_CELL_DIFFERENTIATION	GOBP_HEMATOPOIETIC_PROGENITOR_CELL_DIFFERENTIATION	GOBP_HEMATOPOIETIC_PROGENITOR_CELL_DIFFERENTIATION	4/201	123/17872	0.0502366208685315	0.15642572030358	0.112329989525834	RBM47/NFE2L2/FLT1/PLEK	4
GOBP_MITOTIC_NUCLEAR_DIVISION	GOBP_MITOTIC_NUCLEAR_DIVISION	GOBP_MITOTIC_NUCLEAR_DIVISION	7/201	296/17872	0.050388593048927	0.156735321235609	0.11255231530055	IL1B/IL1A/EREG/INSR/DUSP1/TNF/TEX14	7
GOBP_REGULATION_OF_HEART_GROWTH	GOBP_REGULATION_OF_HEART_GROWTH	GOBP_REGULATION_OF_HEART_GROWTH	3/201	74/17872	0.05080833860628	0.157814203358882	0.113327065241747	PTEN/DUSP6/SAV1	3
GOBP_CALCIUM_ION_TRANSPORT	GOBP_CALCIUM_ION_TRANSPORT	GOBP_CALCIUM_ION_TRANSPORT	9/201	424/17872	0.0508412502272495	0.157814203358882	0.113327065241747	CCL4/PDE4B/SESTD1/CCL3/PRKCE/TMEM165/PTGS2/LILRA5/VMP1	9
GOBP_STRIATED_MUSCLE_CONTRACTION	GOBP_STRIATED_MUSCLE_CONTRACTION	GOBP_STRIATED_MUSCLE_CONTRACTION	5/201	178/17872	0.0509048908736904	0.157847494258023	0.113350971581092	PDE4B/ATP1A1/TNF/KCNJ2/PKP2	5
GOBP_EXOCYTOSIS	GOBP_EXOCYTOSIS	GOBP_EXOCYTOSIS	8/201	360/17872	0.0512282659009049	0.158685272255867	0.113952583602057	HCK/ADGRE2/IL1RAPL1/CCL3/SDC4/SYN1/STX11/PLEK	8
GOBP_FEMALE_SEX_DIFFERENTIATION	GOBP_FEMALE_SEX_DIFFERENTIATION	GOBP_FEMALE_SEX_DIFFERENTIATION	4/201	124/17872	0.0514736363363006	0.159279934845627	0.114379613391976	EREG/INSR/CSMD1/TNFAIP6	4
GOBP_RHYTHMIC_PROCESS	GOBP_RHYTHMIC_PROCESS	GOBP_RHYTHMIC_PROCESS	7/201	298/17872	0.0518905993836032	0.160288738745644	0.115104039856515	EREG/PTEN/KLF9/TNF/TNFAIP6/NAMPT/EGR1	7
GOBP_ALCOHOL_METABOLIC_PROCESS	GOBP_ALCOHOL_METABOLIC_PROCESS	GOBP_ALCOHOL_METABOLIC_PROCESS	8/201	361/17872	0.0519071141898398	0.160288738745644	0.115104039856515	ALDH1A2/NFKB1/GCH1/PTEN/LDLR/CH25H/GK/PLEK	8
GOBP_LYMPHOCYTE_APOPTOTIC_PROCESS	GOBP_LYMPHOCYTE_APOPTOTIC_PROCESS	GOBP_LYMPHOCYTE_APOPTOTIC_PROCESS	3/201	75/17872	0.052502841962994	0.160578059833991	0.115311802587354	PTEN/BCL6/IL2RA	3
GOBP_POLYSACCHARIDE_BIOSYNTHETIC_PROCESS	GOBP_POLYSACCHARIDE_BIOSYNTHETIC_PROCESS	GOBP_POLYSACCHARIDE_BIOSYNTHETIC_PROCESS	3/201	75/17872	0.052502841962994	0.160578059833991	0.115311802587354	NFKB1/INSR/CSGALNACT2	3
GOBP_FAT_CELL_DIFFERENTIATION	GOBP_FAT_CELL_DIFFERENTIATION	GOBP_FAT_CELL_DIFFERENTIATION	6/201	238/17872	0.0526253844457408	0.160578059833991	0.115311802587354	SOD2/ZBTB16/ZFP36/TNF/PTGS2/SAV1	6
GOBP_REGULATION_OF_PROTEIN_CONTAINING_COMPLEX_DISASSEMBLY	GOBP_REGULATION_OF_PROTEIN_CONTAINING_COMPLEX_DISASSEMBLY	GOBP_REGULATION_OF_PROTEIN_CONTAINING_COMPLEX_DISASSEMBLY	4/201	125/17872	0.0527272505025236	0.160578059833991	0.115311802587354	IRAK3/INSR/TNF/PLEK	4
GOBP_DENDRITIC_CELL_MIGRATION	GOBP_DENDRITIC_CELL_MIGRATION	GOBP_DENDRITIC_CELL_MIGRATION	2/201	33/17872	0.0529159345681574	0.160578059833991	0.115311802587354	SLAMF1/GPR183	2
GOBP_EPITHELIAL_CELL_MORPHOGENESIS	GOBP_EPITHELIAL_CELL_MORPHOGENESIS	GOBP_EPITHELIAL_CELL_MORPHOGENESIS	2/201	33/17872	0.0529159345681574	0.160578059833991	0.115311802587354	CLIC4/RILPL2	2
GOBP_FC_RECEPTOR_MEDIATED_STIMULATORY_SIGNALING_PATHWAY	GOBP_FC_RECEPTOR_MEDIATED_STIMULATORY_SIGNALING_PATHWAY	GOBP_FC_RECEPTOR_MEDIATED_STIMULATORY_SIGNALING_PATHWAY	2/201	33/17872	0.0529159345681574	0.160578059833991	0.115311802587354	HCK/PRKCE	2
GOBP_INTERLEUKIN_4_PRODUCTION	GOBP_INTERLEUKIN_4_PRODUCTION	GOBP_INTERLEUKIN_4_PRODUCTION	2/201	33/17872	0.0529159345681574	0.160578059833991	0.115311802587354	NLRP3/SCGB1A1	2
GOBP_MATERNAL_PLACENTA_DEVELOPMENT	GOBP_MATERNAL_PLACENTA_DEVELOPMENT	GOBP_MATERNAL_PLACENTA_DEVELOPMENT	2/201	33/17872	0.0529159345681574	0.160578059833991	0.115311802587354	PTGS2/CTSB	2
GOBP_NEGATIVE_REGULATION_OF_CYCLIN_DEPENDENT_PROTEIN_SERINE_THREONINE_KINASE_ACTIVITY	GOBP_NEGATIVE_REGULATION_OF_CYCLIN_DEPENDENT_PROTEIN_SERINE_THREONINE_KINASE_ACTIVITY	GOBP_NEGATIVE_REGULATION_OF_CYCLIN_DEPENDENT_PROTEIN_SERINE_THREONINE_KINASE_ACTIVITY	2/201	33/17872	0.0529159345681574	0.160578059833991	0.115311802587354	TNFAIP3/PTEN	2
GOBP_NEURON_DEATH_IN_RESPONSE_TO_OXIDATIVE_STRESS	GOBP_NEURON_DEATH_IN_RESPONSE_TO_OXIDATIVE_STRESS	GOBP_NEURON_DEATH_IN_RESPONSE_TO_OXIDATIVE_STRESS	2/201	33/17872	0.0529159345681574	0.160578059833991	0.115311802587354	TNF/TLR4	2
GOBP_POSITIVE_REGULATION_OF_CELLULAR_RESPONSE_TO_TRANSFORMING_GROWTH_FACTOR_BETA_STIMULUS	GOBP_POSITIVE_REGULATION_OF_CELLULAR_RESPONSE_TO_TRANSFORMING_GROWTH_FACTOR_BETA_STIMULUS	GOBP_POSITIVE_REGULATION_OF_CELLULAR_RESPONSE_TO_TRANSFORMING_GROWTH_FACTOR_BETA_STIMULUS	2/201	33/17872	0.0529159345681574	0.160578059833991	0.115311802587354	THBS1/HIPK2	2
GOBP_POSITIVE_REGULATION_OF_VASOCONSTRICTION	GOBP_POSITIVE_REGULATION_OF_VASOCONSTRICTION	GOBP_POSITIVE_REGULATION_OF_VASOCONSTRICTION	2/201	33/17872	0.0529159345681574	0.160578059833991	0.115311802587354	TBXAS1/PTGS2	2
GOBP_RECEPTOR_RECYCLING	GOBP_RECEPTOR_RECYCLING	GOBP_RECEPTOR_RECYCLING	2/201	33/17872	0.0529159345681574	0.160578059833991	0.115311802587354	LDLR/ECE1	2
GOBP_REGULATION_OF_NEUTROPHIL_CHEMOTAXIS	GOBP_REGULATION_OF_NEUTROPHIL_CHEMOTAXIS	GOBP_REGULATION_OF_NEUTROPHIL_CHEMOTAXIS	2/201	33/17872	0.0529159345681574	0.160578059833991	0.115311802587354	CXCL8/TNFAIP6	2
GOBP_REGULATION_OF_SENSORY_PERCEPTION	GOBP_REGULATION_OF_SENSORY_PERCEPTION	GOBP_REGULATION_OF_SENSORY_PERCEPTION	2/201	33/17872	0.0529159345681574	0.160578059833991	0.115311802587354	IL1A/CCL3	2
GOBP_TRANSEPITHELIAL_TRANSPORT	GOBP_TRANSEPITHELIAL_TRANSPORT	GOBP_TRANSEPITHELIAL_TRANSPORT	2/201	33/17872	0.0529159345681574	0.160578059833991	0.115311802587354	SLC1A3/SLC1A2	2
GOBP_POSITIVE_REGULATION_OF_CELLULAR_COMPONENT_BIOGENESIS	GOBP_POSITIVE_REGULATION_OF_CELLULAR_COMPONENT_BIOGENESIS	GOBP_POSITIVE_REGULATION_OF_CELLULAR_COMPONENT_BIOGENESIS	10/201	494/17872	0.0531180402710851	0.161027555008787	0.115634587025736	HCK/FMN1/TNF/IL1RAPL1/PRKCE/SDC4/SNX9/PLEK/TLR4/MTSS1	10
GOBP_INOSITOL_LIPID_MEDIATED_SIGNALING	GOBP_INOSITOL_LIPID_MEDIATED_SIGNALING	GOBP_INOSITOL_LIPID_MEDIATED_SIGNALING	5/201	181/17872	0.053958306680905	0.163408760232629	0.117344540844928	PTEN/INSR/TNF/PIK3AP1/FLT1	5
GOBP_NEGATIVE_REGULATION_OF_WOUND_HEALING	GOBP_NEGATIVE_REGULATION_OF_WOUND_HEALING	GOBP_NEGATIVE_REGULATION_OF_WOUND_HEALING	3/201	76/17872	0.0542244014247708	0.163881853546192	0.117684271209309	THBS1/PTEN/TNF	3
GOBP_POSITIVE_REGULATION_OF_BLOOD_VESSEL_ENDOTHELIAL_CELL_MIGRATION	GOBP_POSITIVE_REGULATION_OF_BLOOD_VESSEL_ENDOTHELIAL_CELL_MIGRATION	GOBP_POSITIVE_REGULATION_OF_BLOOD_VESSEL_ENDOTHELIAL_CELL_MIGRATION	3/201	76/17872	0.0542244014247708	0.163881853546192	0.117684271209309	THBS1/NFE2L2/PTGS2	3
GOBP_CELL_SUBSTRATE_ADHESION	GOBP_CELL_SUBSTRATE_ADHESION	GOBP_CELL_SUBSTRATE_ADHESION	8/201	365/17872	0.054680554364288	0.165093212215254	0.118554153133738	CD44/THBS1/FMN1/PTEN/BCL6/RIN2/PRKCE/SDC4	8
GOBP_REGULATION_OF_NEURON_PROJECTION_DEVELOPMENT	GOBP_REGULATION_OF_NEURON_PROJECTION_DEVELOPMENT	GOBP_REGULATION_OF_NEURON_PROJECTION_DEVELOPMENT	9/201	431/17872	0.0552626647671803	0.166578409340639	0.119620679643665	CFLAR/DENND5A/SIPA1L1/PTEN/EHD1/RAPGEF2/IL1RAPL1/NFE2L2/ABL2	9
GOBP_T_CELL_RECEPTOR_SIGNALING_PATHWAY	GOBP_T_CELL_RECEPTOR_SIGNALING_PATHWAY	GOBP_T_CELL_RECEPTOR_SIGNALING_PATHWAY	4/201	127/17872	0.0552841519434237	0.166578409340639	0.119620679643665	NFKBIZ/LCP2/PDE4B/PTPN2	4
GOBP_CELL_COMMUNICATION_BY_ELECTRICAL_COUPLING	GOBP_CELL_COMMUNICATION_BY_ELECTRICAL_COUPLING	GOBP_CELL_COMMUNICATION_BY_ELECTRICAL_COUPLING	2/201	34/17872	0.0558176341941248	0.167370239595848	0.12018929639097	ATP1A1/PKP2	2
GOBP_LOW_DENSITY_LIPOPROTEIN_PARTICLE_CLEARANCE	GOBP_LOW_DENSITY_LIPOPROTEIN_PARTICLE_CLEARANCE	GOBP_LOW_DENSITY_LIPOPROTEIN_PARTICLE_CLEARANCE	2/201	34/17872	0.0558176341941248	0.167370239595848	0.12018929639097	EHD1/LDLR	2
GOBP_REGULATION_OF_SYNAPTIC_TRANSMISSION_GABAERGIC	GOBP_REGULATION_OF_SYNAPTIC_TRANSMISSION_GABAERGIC	GOBP_REGULATION_OF_SYNAPTIC_TRANSMISSION_GABAERGIC	2/201	34/17872	0.0558176341941248	0.167370239595848	0.12018929639097	PTEN/PRKCE	2
GOBP_GLAND_DEVELOPMENT	GOBP_GLAND_DEVELOPMENT	GOBP_GLAND_DEVELOPMENT	9/201	432/17872	0.0559141187447455	0.167370239595848	0.12018929639097	TNFAIP3/SOD2/ALDH1A2/CFLAR/AREG/PTEN/INSR/TNF/CSMD1	9
GOBP_CARDIAC_MUSCLE_CELL_ACTION_POTENTIAL	GOBP_CARDIAC_MUSCLE_CELL_ACTION_POTENTIAL	GOBP_CARDIAC_MUSCLE_CELL_ACTION_POTENTIAL	3/201	77/17872	0.0559728176031972	0.167370239595848	0.12018929639097	ATP1A1/KCNJ2/PKP2	3
GOBP_NEGATIVE_REGULATION_OF_ENDOTHELIAL_CELL_PROLIFERATION	GOBP_NEGATIVE_REGULATION_OF_ENDOTHELIAL_CELL_PROLIFERATION	GOBP_NEGATIVE_REGULATION_OF_ENDOTHELIAL_CELL_PROLIFERATION	3/201	77/17872	0.0559728176031972	0.167370239595848	0.12018929639097	THBS1/TNF/FLT1	3
GOBP_REGULATION_OF_CARDIAC_MUSCLE_CONTRACTION	GOBP_REGULATION_OF_CARDIAC_MUSCLE_CONTRACTION	GOBP_REGULATION_OF_CARDIAC_MUSCLE_CONTRACTION	3/201	77/17872	0.0559728176031972	0.167370239595848	0.12018929639097	PDE4B/KCNJ2/PKP2	3
GOBP_NEGATIVE_REGULATION_OF_MITOTIC_CELL_CYCLE_PHASE_TRANSITION	GOBP_NEGATIVE_REGULATION_OF_MITOTIC_CELL_CYCLE_PHASE_TRANSITION	GOBP_NEGATIVE_REGULATION_OF_MITOTIC_CELL_CYCLE_PHASE_TRANSITION	5/201	183/17872	0.0560519173168797	0.167370239595848	0.12018929639097	GPR132/PTEN/DUSP1/PLK3/TEX14	5
GOBP_REGULATION_OF_PEPTIDE_TRANSPORT	GOBP_REGULATION_OF_PEPTIDE_TRANSPORT	GOBP_REGULATION_OF_PEPTIDE_TRANSPORT	5/201	183/17872	0.0560519173168797	0.167370239595848	0.12018929639097	IL1B/ENSA/TNF/PRKCE/KLF7	5
GOBP_ORGANIC_HYDROXY_COMPOUND_BIOSYNTHETIC_PROCESS	GOBP_ORGANIC_HYDROXY_COMPOUND_BIOSYNTHETIC_PROCESS	GOBP_ORGANIC_HYDROXY_COMPOUND_BIOSYNTHETIC_PROCESS	6/201	243/17872	0.0570812564414617	0.17027338796488	0.122274059850921	NFKB1/GCH1/RAPGEF2/CH25H/TNF/PLEK	6
GOBP_LEUKOCYTE_DEGRANULATION	GOBP_LEUKOCYTE_DEGRANULATION	GOBP_LEUKOCYTE_DEGRANULATION	3/201	78/17872	0.0577478852970185	0.171918105629747	0.123455138753475	HCK/ADGRE2/CCL3	3
GOBP_T_CELL_DIFFERENTIATION_IN_THYMUS	GOBP_T_CELL_DIFFERENTIATION_IN_THYMUS	GOBP_T_CELL_DIFFERENTIATION_IN_THYMUS	3/201	78/17872	0.0577478852970185	0.171918105629747	0.123455138753475	IL1B/IL1A/PTPN2	3
GOBP_COGNITION	GOBP_COGNITION	GOBP_COGNITION	7/201	306/17872	0.0581796271769734	0.173030735661926	0.124254123214715	PTEN/INSR/LDLR/TNF/CSMD1/PTGS2/BTG2	7
GOBP_CHONDROITIN_SULFATE_PROTEOGLYCAN_METABOLIC_PROCESS	GOBP_CHONDROITIN_SULFATE_PROTEOGLYCAN_METABOLIC_PROCESS	GOBP_CHONDROITIN_SULFATE_PROTEOGLYCAN_METABOLIC_PROCESS	2/201	35/17872	0.0587739119224387	0.174450327626502	0.125273538373567	CHST11/CSGALNACT2	2
GOBP_HINDLIMB_MORPHOGENESIS	GOBP_HINDLIMB_MORPHOGENESIS	GOBP_HINDLIMB_MORPHOGENESIS	2/201	35/17872	0.0587739119224387	0.174450327626502	0.125273538373567	ZBTB16/FMN1	2
GOBP_REGULATION_OF_DEPHOSPHORYLATION	GOBP_REGULATION_OF_DEPHOSPHORYLATION	GOBP_REGULATION_OF_DEPHOSPHORYLATION	4/201	130/17872	0.05924314955522	0.175503271278585	0.126029661785882	PPP1R15A/ENSA/TNF/PLEK	4
GOBP_REPRODUCTIVE_SYSTEM_DEVELOPMENT	GOBP_REPRODUCTIVE_SYSTEM_DEVELOPMENT	GOBP_REPRODUCTIVE_SYSTEM_DEVELOPMENT	9/201	437/17872	0.059246327246911	0.175503271278585	0.126029661785882	IL1A/EREG/PTEN/INSR/ADM/CSMD1/TNFAIP6/PTGS2/CTSB	9
GOBP_POSITIVE_REGULATION_OF_ESTABLISHMENT_OF_PROTEIN_LOCALIZATION	GOBP_POSITIVE_REGULATION_OF_ESTABLISHMENT_OF_PROTEIN_LOCALIZATION	GOBP_POSITIVE_REGULATION_OF_ESTABLISHMENT_OF_PROTEIN_LOCALIZATION	7/201	308/17872	0.0598225311317805	0.177034335680656	0.127129125786522	IL1B/IL1A/TNF/PLK3/PRKCE/PTGS2/TLR4	7
GOBP_CELL_KILLING	GOBP_CELL_KILLING	GOBP_CELL_KILLING	5/201	187/17872	0.0603782768734573	0.178325148429231	0.12805606403073	SERPINB9/RNF19B/RPL30/CD55/ICAM1	5
GOBP_PROTEIN_HOMOOLIGOMERIZATION	GOBP_PROTEIN_HOMOOLIGOMERIZATION	GOBP_PROTEIN_HOMOOLIGOMERIZATION	5/201	187/17872	0.0603782768734573	0.178325148429231	0.12805606403073	SOD2/ALDH1A2/EHD1/KCNJ2/SLC1A2	5
GOBP_MITOTIC_CELL_CYCLE_PHASE_TRANSITION	GOBP_MITOTIC_CELL_CYCLE_PHASE_TRANSITION	GOBP_MITOTIC_CELL_CYCLE_PHASE_TRANSITION	9/201	440/17872	0.0613059015714587	0.179979733151737	0.129244228510254	GPR132/PTEN/ENSA/DUSP1/PLK3/TEX14/CCND3/EIF4E/BACH1	9
GOBP_CENTRAL_NERVOUS_SYSTEM_NEURON_DEVELOPMENT	GOBP_CENTRAL_NERVOUS_SYSTEM_NEURON_DEVELOPMENT	GOBP_CENTRAL_NERVOUS_SYSTEM_NEURON_DEVELOPMENT	3/201	80/17872	0.061377126733314	0.179979733151737	0.129244228510254	PTEN/RAPGEF2/BTG2	3
GOBP_CYCLIC_NUCLEOTIDE_MEDIATED_SIGNALING	GOBP_CYCLIC_NUCLEOTIDE_MEDIATED_SIGNALING	GOBP_CYCLIC_NUCLEOTIDE_MEDIATED_SIGNALING	3/201	80/17872	0.061377126733314	0.179979733151737	0.129244228510254	THBS1/RAPGEF2/ADM	3
GOBP_VASCULOGENESIS	GOBP_VASCULOGENESIS	GOBP_VASCULOGENESIS	3/201	80/17872	0.061377126733314	0.179979733151737	0.129244228510254	RIN2/RAPGEF2/ADM	3
GOBP_REGENERATION	GOBP_REGENERATION	GOBP_REGENERATION	5/201	188/17872	0.0614888227762495	0.179979733151737	0.129244228510254	CFLAR/PTEN/TNF/ADM/PTPN12	5
GOBP_ANTIGEN_PROCESSING_AND_PRESENTATION_OF_PEPTIDE_OR_POLYSACCHARIDE_ANTIGEN_VIA_MHC_CLASS_II	GOBP_ANTIGEN_PROCESSING_AND_PRESENTATION_OF_PEPTIDE_OR_POLYSACCHARIDE_ANTIGEN_VIA_MHC_CLASS_II	GOBP_ANTIGEN_PROCESSING_AND_PRESENTATION_OF_PEPTIDE_OR_POLYSACCHARIDE_ANTIGEN_VIA_MHC_CLASS_II	2/201	36/17872	0.0617831869753196	0.179979733151737	0.129244228510254	THBS1/HLA-DQA2	2
GOBP_CELLULAR_RESPONSE_TO_ALKALOID	GOBP_CELLULAR_RESPONSE_TO_ALKALOID	GOBP_CELLULAR_RESPONSE_TO_ALKALOID	2/201	36/17872	0.0617831869753196	0.179979733151737	0.129244228510254	SLC1A3/SLC1A2	2
GOBP_CELLULAR_RESPONSE_TO_LIPOPROTEIN_PARTICLE_STIMULUS	GOBP_CELLULAR_RESPONSE_TO_LIPOPROTEIN_PARTICLE_STIMULUS	GOBP_CELLULAR_RESPONSE_TO_LIPOPROTEIN_PARTICLE_STIMULUS	2/201	36/17872	0.0617831869753196	0.179979733151737	0.129244228510254	LDLR/TLR4	2
GOBP_POSITIVE_REGULATION_OF_PHOSPHATASE_ACTIVITY	GOBP_POSITIVE_REGULATION_OF_PHOSPHATASE_ACTIVITY	GOBP_POSITIVE_REGULATION_OF_PHOSPHATASE_ACTIVITY	2/201	36/17872	0.0617831869753196	0.179979733151737	0.129244228510254	PPP1R15A/PLEK	2
GOBP_POSITIVE_T_CELL_SELECTION	GOBP_POSITIVE_T_CELL_SELECTION	GOBP_POSITIVE_T_CELL_SELECTION	2/201	36/17872	0.0617831869753196	0.179979733151737	0.129244228510254	PTPN2/STAT3	2
GOBP_REGULATION_OF_CALCINEURIN_MEDIATED_SIGNALING	GOBP_REGULATION_OF_CALCINEURIN_MEDIATED_SIGNALING	GOBP_REGULATION_OF_CALCINEURIN_MEDIATED_SIGNALING	2/201	36/17872	0.0617831869753196	0.179979733151737	0.129244228510254	TNF/NFAT5	2
GOBP_REGULATION_OF_DNA_DAMAGE_RESPONSE_SIGNAL_TRANSDUCTION_BY_P53_CLASS_MEDIATOR	GOBP_REGULATION_OF_DNA_DAMAGE_RESPONSE_SIGNAL_TRANSDUCTION_BY_P53_CLASS_MEDIATOR	GOBP_REGULATION_OF_DNA_DAMAGE_RESPONSE_SIGNAL_TRANSDUCTION_BY_P53_CLASS_MEDIATOR	2/201	36/17872	0.0617831869753196	0.179979733151737	0.129244228510254	PMAIP1/CD44	2
GOBP_REGULATORY_T_CELL_DIFFERENTIATION	GOBP_REGULATORY_T_CELL_DIFFERENTIATION	GOBP_REGULATORY_T_CELL_DIFFERENTIATION	2/201	36/17872	0.0617831869753196	0.179979733151737	0.129244228510254	BCL6/IRF1	2
GOBP_RESPONSE_TO_GROWTH_HORMONE	GOBP_RESPONSE_TO_GROWTH_HORMONE	GOBP_RESPONSE_TO_GROWTH_HORMONE	2/201	36/17872	0.0617831869753196	0.179979733151737	0.129244228510254	PTPN1/STAT3	2
GOBP_POSITIVE_REGULATION_OF_ENDOTHELIAL_CELL_MIGRATION	GOBP_POSITIVE_REGULATION_OF_ENDOTHELIAL_CELL_MIGRATION	GOBP_POSITIVE_REGULATION_OF_ENDOTHELIAL_CELL_MIGRATION	4/201	132/17872	0.0619644277523641	0.180331598034441	0.129496904211616	THBS1/RIN2/NFE2L2/PTGS2	4
GOBP_PEPTIDE_TRANSPORT	GOBP_PEPTIDE_TRANSPORT	GOBP_PEPTIDE_TRANSPORT	6/201	249/17872	0.0627196481870826	0.18235156972911	0.130947454663705	IL1B/IL1RN/ENSA/TNF/PRKCE/KLF7	6
GOBP_ACTIVATION_OF_CYSTEINE_TYPE_ENDOPEPTIDASE_ACTIVITY_INVOLVED_IN_APOPTOTIC_PROCESS	GOBP_ACTIVATION_OF_CYSTEINE_TYPE_ENDOPEPTIDASE_ACTIVITY_INVOLVED_IN_APOPTOTIC_PROCESS	GOBP_ACTIVATION_OF_CYSTEINE_TYPE_ENDOPEPTIDASE_ACTIVITY_INVOLVED_IN_APOPTOTIC_PROCESS	3/201	81/17872	0.0632308630485561	0.183658874852817	0.131886236154166	CFLAR/PMAIP1/TNF	3
GOBP_ACTIN_FILAMENT_BASED_MOVEMENT	GOBP_ACTIN_FILAMENT_BASED_MOVEMENT	GOBP_ACTIN_FILAMENT_BASED_MOVEMENT	4/201	133/17872	0.0633495098673356	0.183824501881578	0.132005173643281	PDE4B/ATP1A1/KCNJ2/PKP2	4
GOBP_REGULATION_OF_MUSCLE_SYSTEM_PROCESS	GOBP_REGULATION_OF_MUSCLE_SYSTEM_PROCESS	GOBP_REGULATION_OF_MUSCLE_SYSTEM_PROCESS	6/201	250/17872	0.0636903389439564	0.184432733036942	0.132441947079125	PDE4B/ATP1A1/PTGS2/KCNJ2/KCNMA1/PKP2	6
GOBP_CELLULAR_MODIFIED_AMINO_ACID_METABOLIC_PROCESS	GOBP_CELLULAR_MODIFIED_AMINO_ACID_METABOLIC_PROCESS	GOBP_CELLULAR_MODIFIED_AMINO_ACID_METABOLIC_PROCESS	5/201	190/17872	0.0637446019983532	0.184432733036942	0.132441947079125	SOD2/GCH1/NFE2L2/CTSB/SLC1A2	5
GOBP_REGULATION_OF_PROTEASOMAL_PROTEIN_CATABOLIC_PROCESS	GOBP_REGULATION_OF_PROTEASOMAL_PROTEIN_CATABOLIC_PROCESS	GOBP_REGULATION_OF_PROTEASOMAL_PROTEIN_CATABOLIC_PROCESS	5/201	190/17872	0.0637446019983532	0.184432733036942	0.132441947079125	RNF144B/RNF19B/N4BP1/PLK3/NFE2L2	5
GOBP_AGING	GOBP_AGING	GOBP_AGING	7/201	313/17872	0.064054099169208	0.185148621920298	0.132956029997285	SOD2/PTEN/BCL6/ADM/NFE2L2/PTGS2/SLC1A2	7
GOBP_RECEPTOR_MEDIATED_ENDOCYTOSIS	GOBP_RECEPTOR_MEDIATED_ENDOCYTOSIS	GOBP_RECEPTOR_MEDIATED_ENDOCYTOSIS	6/201	251/17872	0.064669879118694	0.185764214016368	0.133398089356638	FPR2/INSR/LDLR/ADM/CXCL8/SNX9	6
GOBP_C21_STEROID_HORMONE_METABOLIC_PROCESS	GOBP_C21_STEROID_HORMONE_METABOLIC_PROCESS	GOBP_C21_STEROID_HORMONE_METABOLIC_PROCESS	2/201	37/17872	0.0648439069123263	0.185764214016368	0.133398089356638	ADM/EGR1	2
GOBP_DETECTION_OF_BIOTIC_STIMULUS	GOBP_DETECTION_OF_BIOTIC_STIMULUS	GOBP_DETECTION_OF_BIOTIC_STIMULUS	2/201	37/17872	0.0648439069123263	0.185764214016368	0.133398089356638	NLRP3/TLR4	2
GOBP_EMBRYONIC_CAMERA_TYPE_EYE_DEVELOPMENT	GOBP_EMBRYONIC_CAMERA_TYPE_EYE_DEVELOPMENT	GOBP_EMBRYONIC_CAMERA_TYPE_EYE_DEVELOPMENT	2/201	37/17872	0.0648439069123263	0.185764214016368	0.133398089356638	ALDH1A2/HIPK2	2
GOBP_EPIBOLY	GOBP_EPIBOLY	GOBP_EPIBOLY	2/201	37/17872	0.0648439069123263	0.185764214016368	0.133398089356638	CD44/PTEN	2
GOBP_NEGATIVE_REGULATION_OF_ORGAN_GROWTH	GOBP_NEGATIVE_REGULATION_OF_ORGAN_GROWTH	GOBP_NEGATIVE_REGULATION_OF_ORGAN_GROWTH	2/201	37/17872	0.0648439069123263	0.185764214016368	0.133398089356638	PTEN/SAV1	2
GOBP_NEGATIVE_REGULATION_OF_PHOSPHATASE_ACTIVITY	GOBP_NEGATIVE_REGULATION_OF_PHOSPHATASE_ACTIVITY	GOBP_NEGATIVE_REGULATION_OF_PHOSPHATASE_ACTIVITY	2/201	37/17872	0.0648439069123263	0.185764214016368	0.133398089356638	PPP1R15A/TNF	2
GOBP_POSITIVE_REGULATION_OF_LIPID_KINASE_ACTIVITY	GOBP_POSITIVE_REGULATION_OF_LIPID_KINASE_ACTIVITY	GOBP_POSITIVE_REGULATION_OF_LIPID_KINASE_ACTIVITY	2/201	37/17872	0.0648439069123263	0.185764214016368	0.133398089356638	FPR2/FLT1	2
GOBP_TYPE_2_IMMUNE_RESPONSE	GOBP_TYPE_2_IMMUNE_RESPONSE	GOBP_TYPE_2_IMMUNE_RESPONSE	2/201	37/17872	0.0648439069123263	0.185764214016368	0.133398089356638	NLRP3/BCL6	2
GOBP_VESICLE_LOCALIZATION	GOBP_VESICLE_LOCALIZATION	GOBP_VESICLE_LOCALIZATION	5/201	191/17872	0.0648898126064552	0.185764214016368	0.133398089356638	PTEN/LIMK2/SDC4/SYN1/LINC00869	5
GOBP_NEGATIVE_REGULATION_OF_TRANSMEMBRANE_RECEPTOR_PROTEIN_SERINE_THREONINE_KINASE_SIGNALING_PATHWAY	GOBP_NEGATIVE_REGULATION_OF_TRANSMEMBRANE_RECEPTOR_PROTEIN_SERINE_THREONINE_KINASE_SIGNALING_PATHWAY	GOBP_NEGATIVE_REGULATION_OF_TRANSMEMBRANE_RECEPTOR_PROTEIN_SERINE_THREONINE_KINASE_SIGNALING_PATHWAY	4/201	135/17872	0.0661682985965819	0.189242602793484	0.135895935453443	HIPK2/TNFAIP6/CHST11/LDLRAD4	4
GOBP_GLYCEROLIPID_BIOSYNTHETIC_PROCESS	GOBP_GLYCEROLIPID_BIOSYNTHETIC_PROCESS	GOBP_GLYCEROLIPID_BIOSYNTHETIC_PROCESS	6/201	253/17872	0.0666555056549688	0.190453422767023	0.136765430538275	ACSL1/PTEN/LDLR/GK/SLC44A2/PIGL	6
GOBP_LOCOMOTORY_BEHAVIOR	GOBP_LOCOMOTORY_BEHAVIOR	GOBP_LOCOMOTORY_BEHAVIOR	5/201	193/17872	0.0672148086381801	0.19186772647626	0.137781048177987	SOD2/PTEN/HIPK2/PRKCE/EGR1	5
GOBP_NEGATIVE_REGULATION_OF_NOTCH_SIGNALING_PATHWAY	GOBP_NEGATIVE_REGULATION_OF_NOTCH_SIGNALING_PATHWAY	GOBP_NEGATIVE_REGULATION_OF_NOTCH_SIGNALING_PATHWAY	2/201	38/17872	0.0679545471981793	0.19323967044058	0.138766247100793	NFKBIA/BCL6	2
GOBP_POSITIVE_REGULATION_OF_ERBB_SIGNALING_PATHWAY	GOBP_POSITIVE_REGULATION_OF_ERBB_SIGNALING_PATHWAY	GOBP_POSITIVE_REGULATION_OF_ERBB_SIGNALING_PATHWAY	2/201	38/17872	0.0679545471981793	0.19323967044058	0.138766247100793	AREG/EREG	2
GOBP_REGULATION_OF_KERATINOCYTE_DIFFERENTIATION	GOBP_REGULATION_OF_KERATINOCYTE_DIFFERENTIATION	GOBP_REGULATION_OF_KERATINOCYTE_DIFFERENTIATION	2/201	38/17872	0.0679545471981793	0.19323967044058	0.138766247100793	ZFP36/PRKCH	2
GOBP_VASCULAR_ASSOCIATED_SMOOTH_MUSCLE_CELL_DIFFERENTIATION	GOBP_VASCULAR_ASSOCIATED_SMOOTH_MUSCLE_CELL_DIFFERENTIATION	GOBP_VASCULAR_ASSOCIATED_SMOOTH_MUSCLE_CELL_DIFFERENTIATION	2/201	38/17872	0.0679545471981793	0.19323967044058	0.138766247100793	SOD2/ADM	2
GOBP_CELL_CYCLE_G1_S_PHASE_TRANSITION	GOBP_CELL_CYCLE_G1_S_PHASE_TRANSITION	GOBP_CELL_CYCLE_G1_S_PHASE_TRANSITION	6/201	255/17872	0.0686765155817863	0.195106710457589	0.140106976650561	GPR132/PTEN/PLK3/CCND3/EIF4E/BACH1	6
GOBP_REGULATION_OF_PHOSPHATASE_ACTIVITY	GOBP_REGULATION_OF_PHOSPHATASE_ACTIVITY	GOBP_REGULATION_OF_PHOSPHATASE_ACTIVITY	3/201	84/17872	0.0689458063461694	0.195499372937855	0.140388949284025	PPP1R15A/TNF/PLEK	3
GOBP_REGULATION_OF_POSTSYNAPSE_ORGANIZATION	GOBP_REGULATION_OF_POSTSYNAPSE_ORGANIZATION	GOBP_REGULATION_OF_POSTSYNAPSE_ORGANIZATION	3/201	84/17872	0.0689458063461694	0.195499372937855	0.140388949284025	SIPA1L1/PTEN/IL1RAPL1	3
GOBP_CELLULAR_HORMONE_METABOLIC_PROCESS	GOBP_CELLULAR_HORMONE_METABOLIC_PROCESS	GOBP_CELLULAR_HORMONE_METABOLIC_PROCESS	4/201	137/17872	0.0690515411551033	0.195613245266546	0.140470721498111	ALDH1A2/ADM/ECE1/EGR1	4
GOBP_CARDIAC_MUSCLE_CONTRACTION	GOBP_CARDIAC_MUSCLE_CONTRACTION	GOBP_CARDIAC_MUSCLE_CONTRACTION	4/201	138/17872	0.0705171811280352	0.199372087355949	0.143169962337229	PDE4B/ATP1A1/KCNJ2/PKP2	4
GOBP_CELLULAR_RESPONSE_TO_VIRUS	GOBP_CELLULAR_RESPONSE_TO_VIRUS	GOBP_CELLULAR_RESPONSE_TO_VIRUS	3/201	85/17872	0.0709012476376206	0.199372087355949	0.143169962337229	NLRP3/NFKB1/BIRC3	3
GOBP_REGULATION_OF_LEUKOCYTE_APOPTOTIC_PROCESS	GOBP_REGULATION_OF_LEUKOCYTE_APOPTOTIC_PROCESS	GOBP_REGULATION_OF_LEUKOCYTE_APOPTOTIC_PROCESS	3/201	85/17872	0.0709012476376206	0.199372087355949	0.143169962337229	PTEN/BCL6/RAPGEF2	3
GOBP_NEGATIVE_REGULATION_OF_CYTOKINE_PRODUCTION_INVOLVED_IN_INFLAMMATORY_RESPONSE	GOBP_NEGATIVE_REGULATION_OF_CYTOKINE_PRODUCTION_INVOLVED_IN_INFLAMMATORY_RESPONSE	GOBP_NEGATIVE_REGULATION_OF_CYTOKINE_PRODUCTION_INVOLVED_IN_INFLAMMATORY_RESPONSE	2/201	39/17872	0.0711136107766442	0.199372087355949	0.143169962337229	IL1R2/MEFV	2
GOBP_POSITIVE_REGULATION_OF_FATTY_ACID_METABOLIC_PROCESS	GOBP_POSITIVE_REGULATION_OF_FATTY_ACID_METABOLIC_PROCESS	GOBP_POSITIVE_REGULATION_OF_FATTY_ACID_METABOLIC_PROCESS	2/201	39/17872	0.0711136107766442	0.199372087355949	0.143169962337229	IL1B/PTGS2	2
GOBP_POSITIVE_REGULATION_OF_INTERFERON_BETA_PRODUCTION	GOBP_POSITIVE_REGULATION_OF_INTERFERON_BETA_PRODUCTION	GOBP_POSITIVE_REGULATION_OF_INTERFERON_BETA_PRODUCTION	2/201	39/17872	0.0711136107766442	0.199372087355949	0.143169962337229	IRF1/TLR4	2
GOBP_PYRIDINE_CONTAINING_COMPOUND_METABOLIC_PROCESS	GOBP_PYRIDINE_CONTAINING_COMPOUND_METABOLIC_PROCESS	GOBP_PYRIDINE_CONTAINING_COMPOUND_METABOLIC_PROCESS	2/201	39/17872	0.0711136107766442	0.199372087355949	0.143169962337229	KYNU/NAMPT	2
GOBP_REGULATION_OF_ACTIN_CYTOSKELETON_REORGANIZATION	GOBP_REGULATION_OF_ACTIN_CYTOSKELETON_REORGANIZATION	GOBP_REGULATION_OF_ACTIN_CYTOSKELETON_REORGANIZATION	2/201	39/17872	0.0711136107766442	0.199372087355949	0.143169962337229	HCK/ABL2	2
GOBP_REGULATION_OF_HEART_RATE_BY_CARDIAC_CONDUCTION	GOBP_REGULATION_OF_HEART_RATE_BY_CARDIAC_CONDUCTION	GOBP_REGULATION_OF_HEART_RATE_BY_CARDIAC_CONDUCTION	2/201	39/17872	0.0711136107766442	0.199372087355949	0.143169962337229	KCNJ2/PKP2	2
GOBP_REGULATION_OF_LEUKOCYTE_ADHESION_TO_VASCULAR_ENDOTHELIAL_CELL	GOBP_REGULATION_OF_LEUKOCYTE_ADHESION_TO_VASCULAR_ENDOTHELIAL_CELL	GOBP_REGULATION_OF_LEUKOCYTE_ADHESION_TO_VASCULAR_ENDOTHELIAL_CELL	2/201	39/17872	0.0711136107766442	0.199372087355949	0.143169962337229	TNF/NFAT5	2
GOBP_T_CELL_HOMEOSTASIS	GOBP_T_CELL_HOMEOSTASIS	GOBP_T_CELL_HOMEOSTASIS	2/201	39/17872	0.0711136107766442	0.199372087355949	0.143169962337229	PMAIP1/IL2RA	2
GOBP_POSITIVE_REGULATION_OF_INNATE_IMMUNE_RESPONSE	GOBP_POSITIVE_REGULATION_OF_INNATE_IMMUNE_RESPONSE	GOBP_POSITIVE_REGULATION_OF_INNATE_IMMUNE_RESPONSE	4/201	139/17872	0.0719987478579127	0.201108490883093	0.144416881255922	FPR2/HCK/EREG/TLR4	4
GOBP_POSITIVE_REGULATION_OF_PROTEIN_MODIFICATION_BY_SMALL_PROTEIN_CONJUGATION_OR_REMOVAL	GOBP_POSITIVE_REGULATION_OF_PROTEIN_MODIFICATION_BY_SMALL_PROTEIN_CONJUGATION_OR_REMOVAL	GOBP_POSITIVE_REGULATION_OF_PROTEIN_MODIFICATION_BY_SMALL_PROTEIN_CONJUGATION_OR_REMOVAL	4/201	139/17872	0.0719987478579127	0.201108490883093	0.144416881255922	PELI1/BIRC3/PTEN/TNIP1	4
GOBP_REGULATION_OF_G_PROTEIN_COUPLED_RECEPTOR_SIGNALING_PATHWAY	GOBP_REGULATION_OF_G_PROTEIN_COUPLED_RECEPTOR_SIGNALING_PATHWAY	GOBP_REGULATION_OF_G_PROTEIN_COUPLED_RECEPTOR_SIGNALING_PATHWAY	4/201	139/17872	0.0719987478579127	0.201108490883093	0.144416881255922	PDE4B/ADM/CXCL8/PLEK	4
GOBP_REGULATION_OF_SYNAPTIC_PLASTICITY	GOBP_REGULATION_OF_SYNAPTIC_PLASTICITY	GOBP_REGULATION_OF_SYNAPTIC_PLASTICITY	5/201	197/17872	0.0720026377013556	0.201108490883093	0.144416881255922	SIPA1L1/PTEN/MCTP1/RAPGEF2/PTGS2	5
GOBP_B_CELL_ACTIVATION_INVOLVED_IN_IMMUNE_RESPONSE	GOBP_B_CELL_ACTIVATION_INVOLVED_IN_IMMUNE_RESPONSE	GOBP_B_CELL_ACTIVATION_INVOLVED_IN_IMMUNE_RESPONSE	3/201	86/17872	0.0728815160442907	0.203372836632478	0.146042917778673	BCL6/GPR183/TLR4	3
GOBP_MUSCLE_CELL_DIFFERENTIATION	GOBP_MUSCLE_CELL_DIFFERENTIATION	GOBP_MUSCLE_CELL_DIFFERENTIATION	8/201	389/17872	0.0733001994428419	0.204349995269157	0.146744619642089	SOD2/CFLAR/EREG/SCGB3A1/EHD1/ADM/AKAP13/KDM6B	8
GOBP_ALPHA_BETA_T_CELL_PROLIFERATION	GOBP_ALPHA_BETA_T_CELL_PROLIFERATION	GOBP_ALPHA_BETA_T_CELL_PROLIFERATION	2/201	40/17872	0.074319627650393	0.205273564149187	0.147407838468372	CD55/IRF1	2
GOBP_CARDIAC_MUSCLE_CELL_MEMBRANE_REPOLARIZATION	GOBP_CARDIAC_MUSCLE_CELL_MEMBRANE_REPOLARIZATION	GOBP_CARDIAC_MUSCLE_CELL_MEMBRANE_REPOLARIZATION	2/201	40/17872	0.074319627650393	0.205273564149187	0.147407838468372	ATP1A1/KCNJ2	2
GOBP_CELLULAR_RESPONSE_TO_ESTRADIOL_STIMULUS	GOBP_CELLULAR_RESPONSE_TO_ESTRADIOL_STIMULUS	GOBP_CELLULAR_RESPONSE_TO_ESTRADIOL_STIMULUS	2/201	40/17872	0.074319627650393	0.205273564149187	0.147407838468372	CFLAR/LCOR	2
GOBP_CORTICAL_ACTIN_CYTOSKELETON_ORGANIZATION	GOBP_CORTICAL_ACTIN_CYTOSKELETON_ORGANIZATION	GOBP_CORTICAL_ACTIN_CYTOSKELETON_ORGANIZATION	2/201	40/17872	0.074319627650393	0.205273564149187	0.147407838468372	TNF/PLEK	2
GOBP_METANEPHRIC_NEPHRON_DEVELOPMENT	GOBP_METANEPHRIC_NEPHRON_DEVELOPMENT	GOBP_METANEPHRIC_NEPHRON_DEVELOPMENT	2/201	40/17872	0.074319627650393	0.205273564149187	0.147407838468372	FMN1/EGR1	2
GOBP_NEGATIVE_REGULATION_OF_EPITHELIAL_TO_MESENCHYMAL_TRANSITION	GOBP_NEGATIVE_REGULATION_OF_EPITHELIAL_TO_MESENCHYMAL_TRANSITION	GOBP_NEGATIVE_REGULATION_OF_EPITHELIAL_TO_MESENCHYMAL_TRANSITION	2/201	40/17872	0.074319627650393	0.205273564149187	0.147407838468372	PTEN/LDLRAD4	2
GOBP_NEGATIVE_REGULATION_OF_NIK_NF_KAPPAB_SIGNALING	GOBP_NEGATIVE_REGULATION_OF_NIK_NF_KAPPAB_SIGNALING	GOBP_NEGATIVE_REGULATION_OF_NIK_NF_KAPPAB_SIGNALING	2/201	40/17872	0.074319627650393	0.205273564149187	0.147407838468372	NLRP3/LITAF	2
GOBP_POSITIVE_REGULATION_OF_DNA_REPLICATION	GOBP_POSITIVE_REGULATION_OF_DNA_REPLICATION	GOBP_POSITIVE_REGULATION_OF_DNA_REPLICATION	2/201	40/17872	0.074319627650393	0.205273564149187	0.147407838468372	EREG/BAZ1A	2
GOBP_REGULATION_OF_RESPONSE_TO_REACTIVE_OXYGEN_SPECIES	GOBP_REGULATION_OF_RESPONSE_TO_REACTIVE_OXYGEN_SPECIES	GOBP_REGULATION_OF_RESPONSE_TO_REACTIVE_OXYGEN_SPECIES	2/201	40/17872	0.074319627650393	0.205273564149187	0.147407838468372	GCH1/NFE2L2	2
GOBP_T_HELPER_17_TYPE_IMMUNE_RESPONSE	GOBP_T_HELPER_17_TYPE_IMMUNE_RESPONSE	GOBP_T_HELPER_17_TYPE_IMMUNE_RESPONSE	2/201	40/17872	0.074319627650393	0.205273564149187	0.147407838468372	NFKBIZ/STAT3	2
GOBP_MORPHOGENESIS_OF_A_BRANCHING_STRUCTURE	GOBP_MORPHOGENESIS_OF_A_BRANCHING_STRUCTURE	GOBP_MORPHOGENESIS_OF_A_BRANCHING_STRUCTURE	5/201	199/17872	0.0744651582556344	0.205485260940386	0.147559858854098	CLIC4/AREG/TNF/ADM/CSMD1	5
GOBP_MUSCLE_CELL_APOPTOTIC_PROCESS	GOBP_MUSCLE_CELL_APOPTOTIC_PROCESS	GOBP_MUSCLE_CELL_APOPTOTIC_PROCESS	3/201	87/17872	0.0748863637732028	0.206075667099137	0.147983832082412	SOD2/CFLAR/NFE2L2	3
GOBP_VASCULAR_ASSOCIATED_SMOOTH_MUSCLE_CELL_PROLIFERATION	GOBP_VASCULAR_ASSOCIATED_SMOOTH_MUSCLE_CELL_PROLIFERATION	GOBP_VASCULAR_ASSOCIATED_SMOOTH_MUSCLE_CELL_PROLIFERATION	3/201	87/17872	0.0748863637732028	0.206075667099137	0.147983832082412	SOD2/PTEN/TNF	3
GOBP_VASCULAR_TRANSPORT	GOBP_VASCULAR_TRANSPORT	GOBP_VASCULAR_TRANSPORT	3/201	87/17872	0.0748863637732028	0.206075667099137	0.147983832082412	SLC1A3/INSR/SLC1A2	3
GOBP_RESPONSE_TO_TRANSFORMING_GROWTH_FACTOR_BETA	GOBP_RESPONSE_TO_TRANSFORMING_GROWTH_FACTOR_BETA	GOBP_RESPONSE_TO_TRANSFORMING_GROWTH_FACTOR_BETA	6/201	262/17872	0.0760282173369626	0.209025043609364	0.150101792171447	CFLAR/THBS1/HIPK2/CHST11/STAT3/LDLRAD4	6
GOBP_B_CELL_DIFFERENTIATION	GOBP_B_CELL_DIFFERENTIATION	GOBP_B_CELL_DIFFERENTIATION	4/201	142/17872	0.0765383241792062	0.210233721018943	0.150969748671789	KLF6/BCL6/GPR183/PTPN2	4
GOBP_PROTEIN_TETRAMERIZATION	GOBP_PROTEIN_TETRAMERIZATION	GOBP_PROTEIN_TETRAMERIZATION	3/201	88/17872	0.0769155392910575	0.210845706295877	0.151409217958647	SOD2/ALDH1A2/KCNJ2	3
GOBP_REGULATION_OF_RHO_PROTEIN_SIGNAL_TRANSDUCTION	GOBP_REGULATION_OF_RHO_PROTEIN_SIGNAL_TRANSDUCTION	GOBP_REGULATION_OF_RHO_PROTEIN_SIGNAL_TRANSDUCTION	3/201	88/17872	0.0769155392910575	0.210845706295877	0.151409217958647	BCL6/AKAP13/ABL2	3
GOBP_ENDOTHELIAL_CELL_PROLIFERATION	GOBP_ENDOTHELIAL_CELL_PROLIFERATION	GOBP_ENDOTHELIAL_CELL_PROLIFERATION	5/201	201/17872	0.0769731726973552	0.210845706295877	0.151409217958647	ALDH1A2/THBS1/TNF/STAT3/FLT1	5
GOBP_MRNA_TRANSCRIPTION	GOBP_MRNA_TRANSCRIPTION	GOBP_MRNA_TRANSCRIPTION	2/201	41/17872	0.0775711544667654	0.211512572005815	0.151888097122936	EREG/STAT3	2
GOBP_NEGATIVE_REGULATION_OF_TOLL_LIKE_RECEPTOR_SIGNALING_PATHWAY	GOBP_NEGATIVE_REGULATION_OF_TOLL_LIKE_RECEPTOR_SIGNALING_PATHWAY	GOBP_NEGATIVE_REGULATION_OF_TOLL_LIKE_RECEPTOR_SIGNALING_PATHWAY	2/201	41/17872	0.0775711544667654	0.211512572005815	0.151888097122936	TNFAIP3/IRAK3	2
GOBP_RESPONSE_TO_DEXAMETHASONE	GOBP_RESPONSE_TO_DEXAMETHASONE	GOBP_RESPONSE_TO_DEXAMETHASONE	2/201	41/17872	0.0775711544667654	0.211512572005815	0.151888097122936	CFLAR/EIF4E	2
GOBP_RESPONSE_TO_TESTOSTERONE	GOBP_RESPONSE_TO_TESTOSTERONE	GOBP_RESPONSE_TO_TESTOSTERONE	2/201	41/17872	0.0775711544667654	0.211512572005815	0.151888097122936	CFLAR/THBS1	2
GOBP_STEROID_HORMONE_BIOSYNTHETIC_PROCESS	GOBP_STEROID_HORMONE_BIOSYNTHETIC_PROCESS	GOBP_STEROID_HORMONE_BIOSYNTHETIC_PROCESS	2/201	41/17872	0.0775711544667654	0.211512572005815	0.151888097122936	ADM/EGR1	2
GOBP_ACTION_POTENTIAL	GOBP_ACTION_POTENTIAL	GOBP_ACTION_POTENTIAL	4/201	143/17872	0.0780829019761945	0.212713512872135	0.152750497977944	ATP1A1/TNF/KCNJ2/PKP2	4
GOBP_NEGATIVE_REGULATION_OF_CHROMOSOME_ORGANIZATION	GOBP_NEGATIVE_REGULATION_OF_CHROMOSOME_ORGANIZATION	GOBP_NEGATIVE_REGULATION_OF_CHROMOSOME_ORGANIZATION	3/201	89/17872	0.078968787505951	0.214148993754774	0.153781323037905	HNRNPC/DUSP1/TEX14	3
GOBP_NEURON_PROJECTION_ORGANIZATION	GOBP_NEURON_PROJECTION_ORGANIZATION	GOBP_NEURON_PROJECTION_ORGANIZATION	3/201	89/17872	0.078968787505951	0.214148993754774	0.153781323037905	SIPA1L1/PTEN/INSR	3
GOBP_REGULATION_OF_ANION_TRANSPORT	GOBP_REGULATION_OF_ANION_TRANSPORT	GOBP_REGULATION_OF_ANION_TRANSPORT	3/201	89/17872	0.078968787505951	0.214148993754774	0.153781323037905	IL1B/IL1A/TNF	3
GOBP_REGULATION_OF_ATP_METABOLIC_PROCESS	GOBP_REGULATION_OF_ATP_METABOLIC_PROCESS	GOBP_REGULATION_OF_ATP_METABOLIC_PROCESS	3/201	89/17872	0.078968787505951	0.214148993754774	0.153781323037905	INSR/TNF/STAT3	3
GOBP_RESPONSE_TO_CAMP	GOBP_RESPONSE_TO_CAMP	GOBP_RESPONSE_TO_CAMP	3/201	89/17872	0.078968787505951	0.214148993754774	0.153781323037905	AREG/AQP9/RAPGEF2	3
GOBP_REGULATION_OF_PEPTIDYL_SERINE_PHOSPHORYLATION	GOBP_REGULATION_OF_PEPTIDYL_SERINE_PHOSPHORYLATION	GOBP_REGULATION_OF_PEPTIDYL_SERINE_PHOSPHORYLATION	4/201	144/17872	0.0796430471479318	0.215781298494351	0.154953488164866	CD44/PTEN/TNF/PTGS2	4
GOBP_TRANSFORMING_GROWTH_FACTOR_BETA_RECEPTOR_SIGNALING_PATHWAY	GOBP_TRANSFORMING_GROWTH_FACTOR_BETA_RECEPTOR_SIGNALING_PATHWAY	GOBP_TRANSFORMING_GROWTH_FACTOR_BETA_RECEPTOR_SIGNALING_PATHWAY	5/201	204/17872	0.0808200339980369	0.217909292834862	0.156481610148365	THBS1/HIPK2/CHST11/STAT3/LDLRAD4	5
GOBP_NEGATIVE_REGULATION_OF_METAPHASE_ANAPHASE_TRANSITION_OF_CELL_CYCLE	GOBP_NEGATIVE_REGULATION_OF_METAPHASE_ANAPHASE_TRANSITION_OF_CELL_CYCLE	GOBP_NEGATIVE_REGULATION_OF_METAPHASE_ANAPHASE_TRANSITION_OF_CELL_CYCLE	2/201	42/17872	0.0808667741093505	0.217909292834862	0.156481610148365	DUSP1/TEX14	2
GOBP_NEGATIVE_REGULATION_OF_VASCULAR_ASSOCIATED_SMOOTH_MUSCLE_CELL_PROLIFERATION	GOBP_NEGATIVE_REGULATION_OF_VASCULAR_ASSOCIATED_SMOOTH_MUSCLE_CELL_PROLIFERATION	GOBP_NEGATIVE_REGULATION_OF_VASCULAR_ASSOCIATED_SMOOTH_MUSCLE_CELL_PROLIFERATION	2/201	42/17872	0.0808667741093505	0.217909292834862	0.156481610148365	SOD2/PTEN	2
GOBP_POSITIVE_REGULATION_OF_INTERLEUKIN_12_PRODUCTION	GOBP_POSITIVE_REGULATION_OF_INTERLEUKIN_12_PRODUCTION	GOBP_POSITIVE_REGULATION_OF_INTERLEUKIN_12_PRODUCTION	2/201	42/17872	0.0808667741093505	0.217909292834862	0.156481610148365	IRF1/TLR4	2
GOBP_REGULATION_OF_DEFENSE_RESPONSE_TO_VIRUS_BY_HOST	GOBP_REGULATION_OF_DEFENSE_RESPONSE_TO_VIRUS_BY_HOST	GOBP_REGULATION_OF_DEFENSE_RESPONSE_TO_VIRUS_BY_HOST	2/201	42/17872	0.0808667741093505	0.217909292834862	0.156481610148365	IL1B/TNFAIP3	2
GOBP_REGULATION_OF_TYPE_I_INTERFERON_MEDIATED_SIGNALING_PATHWAY	GOBP_REGULATION_OF_TYPE_I_INTERFERON_MEDIATED_SIGNALING_PATHWAY	GOBP_REGULATION_OF_TYPE_I_INTERFERON_MEDIATED_SIGNALING_PATHWAY	2/201	42/17872	0.0808667741093505	0.217909292834862	0.156481610148365	PTPN1/PTPN2	2
GOBP_CELLULAR_RESPONSE_TO_HYDROGEN_PEROXIDE	GOBP_CELLULAR_RESPONSE_TO_HYDROGEN_PEROXIDE	GOBP_CELLULAR_RESPONSE_TO_HYDROGEN_PEROXIDE	3/201	90/17872	0.0810458499447921	0.217997989526884	0.156545303628354	TNFAIP3/NFE2L2/KDM6B	3
GOBP_REGULATION_OF_SODIUM_ION_TRANSPORT	GOBP_REGULATION_OF_SODIUM_ION_TRANSPORT	GOBP_REGULATION_OF_SODIUM_ION_TRANSPORT	3/201	90/17872	0.0810458499447921	0.217997989526884	0.156545303628354	ATP1A1/PRKCE/PKP2	3
GOBP_LEARNING	GOBP_LEARNING	GOBP_LEARNING	4/201	145/17872	0.0812186811255255	0.218069600177716	0.156596727547913	INSR/CSMD1/PTGS2/BTG2	4
GOBP_POSITIVE_REGULATION_OF_B_CELL_ACTIVATION	GOBP_POSITIVE_REGULATION_OF_B_CELL_ACTIVATION	GOBP_POSITIVE_REGULATION_OF_B_CELL_ACTIVATION	4/201	145/17872	0.0812186811255255	0.218069600177716	0.156596727547913	PELI1/BCL6/GPR183/TLR4	4
GOBP_NEGATIVE_REGULATION_OF_CELLULAR_CATABOLIC_PROCESS	GOBP_NEGATIVE_REGULATION_OF_CELLULAR_CATABOLIC_PROCESS	GOBP_NEGATIVE_REGULATION_OF_CELLULAR_CATABOLIC_PROCESS	6/201	267/17872	0.0815433328425954	0.21874439017038	0.157081297174064	HNRNPC/ZFP36/N4BP1/HIPK2/STAT3/EIF4E	6
GOBP_CIRCADIAN_RHYTHM	GOBP_CIRCADIAN_RHYTHM	GOBP_CIRCADIAN_RHYTHM	5/201	205/17872	0.0821248294665902	0.220106348875866	0.158059325639108	PTEN/KLF9/TNF/NAMPT/EGR1	5
GOBP_NEPHRON_DEVELOPMENT	GOBP_NEPHRON_DEVELOPMENT	GOBP_NEPHRON_DEVELOPMENT	4/201	146/17872	0.0828097232082032	0.221742732791805	0.159234420040342	CFLAR/FMN1/MTSS1/EGR1	4
GOBP_REGULATION_OF_CYTOKINESIS	GOBP_REGULATION_OF_CYTOKINESIS	GOBP_REGULATION_OF_CYTOKINESIS	3/201	91/17872	0.0831464649264976	0.222245434476472	0.159595412304681	PLK3/PRKCE/TEX14	3
GOBP_REGULATION_OF_PROTEIN_DEPHOSPHORYLATION	GOBP_REGULATION_OF_PROTEIN_DEPHOSPHORYLATION	GOBP_REGULATION_OF_PROTEIN_DEPHOSPHORYLATION	3/201	91/17872	0.0831464649264976	0.222245434476472	0.159595412304681	PPP1R15A/ENSA/TNF	3
GOBP_INTRINSIC_APOPTOTIC_SIGNALING_PATHWAY_IN_RESPONSE_TO_DNA_DAMAGE_BY_P53_CLASS_MEDIATOR	GOBP_INTRINSIC_APOPTOTIC_SIGNALING_PATHWAY_IN_RESPONSE_TO_DNA_DAMAGE_BY_P53_CLASS_MEDIATOR	GOBP_INTRINSIC_APOPTOTIC_SIGNALING_PATHWAY_IN_RESPONSE_TO_DNA_DAMAGE_BY_P53_CLASS_MEDIATOR	2/201	43/17872	0.084205095295312	0.222680673108081	0.159907959057447	CD44/HIPK2	2
GOBP_KETONE_BIOSYNTHETIC_PROCESS	GOBP_KETONE_BIOSYNTHETIC_PROCESS	GOBP_KETONE_BIOSYNTHETIC_PROCESS	2/201	43/17872	0.084205095295312	0.222680673108081	0.159907959057447	ADM/EGR1	2
GOBP_LIPID_EXPORT_FROM_CELL	GOBP_LIPID_EXPORT_FROM_CELL	GOBP_LIPID_EXPORT_FROM_CELL	2/201	43/17872	0.084205095295312	0.222680673108081	0.159907959057447	IL1B/IL1A	2
GOBP_MAMMARY_GLAND_MORPHOGENESIS	GOBP_MAMMARY_GLAND_MORPHOGENESIS	GOBP_MAMMARY_GLAND_MORPHOGENESIS	2/201	43/17872	0.084205095295312	0.222680673108081	0.159907959057447	AREG/CSMD1	2
GOBP_NEUROTRANSMITTER_UPTAKE	GOBP_NEUROTRANSMITTER_UPTAKE	GOBP_NEUROTRANSMITTER_UPTAKE	2/201	43/17872	0.084205095295312	0.222680673108081	0.159907959057447	SLC1A3/SLC1A2	2
GOBP_POSITIVE_REGULATION_OF_JUN_KINASE_ACTIVITY	GOBP_POSITIVE_REGULATION_OF_JUN_KINASE_ACTIVITY	GOBP_POSITIVE_REGULATION_OF_JUN_KINASE_ACTIVITY	2/201	43/17872	0.084205095295312	0.222680673108081	0.159907959057447	PTPN1/TNF	2
GOBP_REGULATION_OF_NEURON_MIGRATION	GOBP_REGULATION_OF_NEURON_MIGRATION	GOBP_REGULATION_OF_NEURON_MIGRATION	2/201	43/17872	0.084205095295312	0.222680673108081	0.159907959057447	RAPGEF2/STAT3	2
GOBP_REGULATION_OF_PHOSPHOLIPASE_C_ACTIVITY	GOBP_REGULATION_OF_PHOSPHOLIPASE_C_ACTIVITY	GOBP_REGULATION_OF_PHOSPHOLIPASE_C_ACTIVITY	2/201	43/17872	0.084205095295312	0.222680673108081	0.159907959057447	FLT1/ABL2	2
GOBP_REGULATION_OF_SMOOTH_MUSCLE_CELL_DIFFERENTIATION	GOBP_REGULATION_OF_SMOOTH_MUSCLE_CELL_DIFFERENTIATION	GOBP_REGULATION_OF_SMOOTH_MUSCLE_CELL_DIFFERENTIATION	2/201	43/17872	0.084205095295312	0.222680673108081	0.159907959057447	SOD2/EREG	2
GOBP_SKELETAL_MUSCLE_CONTRACTION	GOBP_SKELETAL_MUSCLE_CONTRACTION	GOBP_SKELETAL_MUSCLE_CONTRACTION	2/201	43/17872	0.084205095295312	0.222680673108081	0.159907959057447	TNF/KCNJ2	2
GOBP_SUPEROXIDE_ANION_GENERATION	GOBP_SUPEROXIDE_ANION_GENERATION	GOBP_SUPEROXIDE_ANION_GENERATION	2/201	43/17872	0.084205095295312	0.222680673108081	0.159907959057447	SOD2/FPR2	2
GOBP_TRANSFORMING_GROWTH_FACTOR_BETA_PRODUCTION	GOBP_TRANSFORMING_GROWTH_FACTOR_BETA_PRODUCTION	GOBP_TRANSFORMING_GROWTH_FACTOR_BETA_PRODUCTION	2/201	43/17872	0.084205095295312	0.222680673108081	0.159907959057447	THBS1/PTGS2	2
GOBP_CELL_CELL_JUNCTION_ORGANIZATION	GOBP_CELL_CELL_JUNCTION_ORGANIZATION	GOBP_CELL_CELL_JUNCTION_ORGANIZATION	5/201	207/17872	0.084767994841078	0.223970707361325	0.160834338260775	IL1B/TNF/MTSS1/PKP2/PRKCH	5
GOBP_DICARBOXYLIC_ACID_TRANSPORT	GOBP_DICARBOXYLIC_ACID_TRANSPORT	GOBP_DICARBOXYLIC_ACID_TRANSPORT	3/201	92/17872	0.0852703677310458	0.224899652468355	0.161501417779029	SLC1A3/TNF/SLC1A2	3
GOBP_NEGATIVE_REGULATION_OF_RESPONSE_TO_WOUNDING	GOBP_NEGATIVE_REGULATION_OF_RESPONSE_TO_WOUNDING	GOBP_NEGATIVE_REGULATION_OF_RESPONSE_TO_WOUNDING	3/201	92/17872	0.0852703677310458	0.224899652468355	0.161501417779029	THBS1/PTEN/TNF	3
GOBP_NEUROTRANSMITTER_TRANSPORT	GOBP_NEUROTRANSMITTER_TRANSPORT	GOBP_NEUROTRANSMITTER_TRANSPORT	5/201	208/17872	0.0861062978009745	0.226903786519706	0.162940595150626	MCTP1/SLC1A3/SYN1/STX11/SLC1A2	5
GOBP_POSITIVE_REGULATION_OF_EPITHELIAL_CELL_PROLIFERATION	GOBP_POSITIVE_REGULATION_OF_EPITHELIAL_CELL_PROLIFERATION	GOBP_POSITIVE_REGULATION_OF_EPITHELIAL_CELL_PROLIFERATION	5/201	209/17872	0.0874557009932214	0.229987073721927	0.165154717089515	TNFAIP3/CFLAR/AREG/TNF/STAT3	5
GOBP_NEGATIVE_REGULATION_OF_RESPONSE_TO_ENDOPLASMIC_RETICULUM_STRESS	GOBP_NEGATIVE_REGULATION_OF_RESPONSE_TO_ENDOPLASMIC_RETICULUM_STRESS	GOBP_NEGATIVE_REGULATION_OF_RESPONSE_TO_ENDOPLASMIC_RETICULUM_STRESS	2/201	44/17872	0.0875847521783806	0.229987073721927	0.165154717089515	PTPN1/PPP1R15A	2
GOBP_POSITIVE_REGULATION_OF_PATTERN_RECOGNITION_RECEPTOR_SIGNALING_PATHWAY	GOBP_POSITIVE_REGULATION_OF_PATTERN_RECOGNITION_RECEPTOR_SIGNALING_PATHWAY	GOBP_POSITIVE_REGULATION_OF_PATTERN_RECOGNITION_RECEPTOR_SIGNALING_PATHWAY	2/201	44/17872	0.0875847521783806	0.229987073721927	0.165154717089515	PELI1/TLR4	2
GOBP_REGULATION_OF_DENDRITIC_SPINE_MORPHOGENESIS	GOBP_REGULATION_OF_DENDRITIC_SPINE_MORPHOGENESIS	GOBP_REGULATION_OF_DENDRITIC_SPINE_MORPHOGENESIS	2/201	44/17872	0.0875847521783806	0.229987073721927	0.165154717089515	SIPA1L1/PTEN	2
GOBP_PEPTIDYL_SERINE_MODIFICATION	GOBP_PEPTIDYL_SERINE_MODIFICATION	GOBP_PEPTIDYL_SERINE_MODIFICATION	7/201	338/17872	0.0878859943788198	0.230575128612154	0.165577001861684	CD44/PTEN/HIPK2/TNF/PRKCE/PTGS2/PRKCH	7
GOBP_SULFUR_COMPOUND_METABOLIC_PROCESS	GOBP_SULFUR_COMPOUND_METABOLIC_PROCESS	GOBP_SULFUR_COMPOUND_METABOLIC_PROCESS	7/201	339/17872	0.088931750760052	0.233113719259433	0.167399974837393	SOD2/ACSL1/NFE2L2/CHST11/TPST1/CSGALNACT2/SLC1A2	7
GOBP_CELL_CELL_JUNCTION_ASSEMBLY	GOBP_CELL_CELL_JUNCTION_ASSEMBLY	GOBP_CELL_CELL_JUNCTION_ASSEMBLY	4/201	150/17872	0.0893262863210528	0.233942328442231	0.167995002692429	IL1B/TNF/PKP2/PRKCH	4
GOBP_REGULATION_OF_CELL_SHAPE	GOBP_REGULATION_OF_CELL_SHAPE	GOBP_REGULATION_OF_CELL_SHAPE	4/201	151/17872	0.0909930867525133	0.236468760457345	0.169809244501543	HCK/RHOH/CCL3/FGD4	4
GOBP_INTRINSIC_APOPTOTIC_SIGNALING_PATHWAY_IN_RESPONSE_TO_OXIDATIVE_STRESS	GOBP_INTRINSIC_APOPTOTIC_SIGNALING_PATHWAY_IN_RESPONSE_TO_OXIDATIVE_STRESS	GOBP_INTRINSIC_APOPTOTIC_SIGNALING_PATHWAY_IN_RESPONSE_TO_OXIDATIVE_STRESS	2/201	45/17872	0.0910044039574362	0.236468760457345	0.169809244501543	SOD2/NFE2L2	2
GOBP_NEGATIVE_REGULATION_OF_DNA_RECOMBINATION	GOBP_NEGATIVE_REGULATION_OF_DNA_RECOMBINATION	GOBP_NEGATIVE_REGULATION_OF_DNA_RECOMBINATION	2/201	45/17872	0.0910044039574362	0.236468760457345	0.169809244501543	BCL6/HELB	2
GOBP_NEGATIVE_REGULATION_OF_LIPID_TRANSPORT	GOBP_NEGATIVE_REGULATION_OF_LIPID_TRANSPORT	GOBP_NEGATIVE_REGULATION_OF_LIPID_TRANSPORT	2/201	45/17872	0.0910044039574362	0.236468760457345	0.169809244501543	NFKB1/THBS1	2
GOBP_POSITIVE_REGULATION_OF_MUSCLE_CONTRACTION	GOBP_POSITIVE_REGULATION_OF_MUSCLE_CONTRACTION	GOBP_POSITIVE_REGULATION_OF_MUSCLE_CONTRACTION	2/201	45/17872	0.0910044039574362	0.236468760457345	0.169809244501543	ATP1A1/PTGS2	2
GOBP_REGULATION_OF_GLYCOLYTIC_PROCESS	GOBP_REGULATION_OF_GLYCOLYTIC_PROCESS	GOBP_REGULATION_OF_GLYCOLYTIC_PROCESS	2/201	45/17872	0.0910044039574362	0.236468760457345	0.169809244501543	INSR/STAT3	2
GOBP_REGULATION_OF_INFLAMMATORY_RESPONSE_TO_ANTIGENIC_STIMULUS	GOBP_REGULATION_OF_INFLAMMATORY_RESPONSE_TO_ANTIGENIC_STIMULUS	GOBP_REGULATION_OF_INFLAMMATORY_RESPONSE_TO_ANTIGENIC_STIMULUS	2/201	45/17872	0.0910044039574362	0.236468760457345	0.169809244501543	HCK/TNF	2
GOBP_REGULATION_OF_POLYSACCHARIDE_METABOLIC_PROCESS	GOBP_REGULATION_OF_POLYSACCHARIDE_METABOLIC_PROCESS	GOBP_REGULATION_OF_POLYSACCHARIDE_METABOLIC_PROCESS	2/201	45/17872	0.0910044039574362	0.236468760457345	0.169809244501543	NFKB1/INSR	2
GOBP_RHYTHMIC_BEHAVIOR	GOBP_RHYTHMIC_BEHAVIOR	GOBP_RHYTHMIC_BEHAVIOR	2/201	45/17872	0.0910044039574362	0.236468760457345	0.169809244501543	PTEN/EGR1	2
GOBP_NEGATIVE_REGULATION_OF_PROTEIN_MODIFICATION_BY_SMALL_PROTEIN_CONJUGATION_OR_REMOVAL	GOBP_NEGATIVE_REGULATION_OF_PROTEIN_MODIFICATION_BY_SMALL_PROTEIN_CONJUGATION_OR_REMOVAL	GOBP_NEGATIVE_REGULATION_OF_PROTEIN_MODIFICATION_BY_SMALL_PROTEIN_CONJUGATION_OR_REMOVAL	3/201	96/17872	0.0939934655427875	0.244023070247289	0.175234027190301	TNFAIP3/N4BP1/PRKCE	3
GOBP_ANTERIOR_POSTERIOR_PATTERN_SPECIFICATION	GOBP_ANTERIOR_POSTERIOR_PATTERN_SPECIFICATION	GOBP_ANTERIOR_POSTERIOR_PATTERN_SPECIFICATION	5/201	214/17872	0.0943679050141553	0.244178801547213	0.175345858513534	ALDH1A2/ZBTB16/ETS2/HIPK2/BTG2	5
GOBP_REGULATION_OF_NEUROTRANSMITTER_LEVELS	GOBP_REGULATION_OF_NEUROTRANSMITTER_LEVELS	GOBP_REGULATION_OF_NEUROTRANSMITTER_LEVELS	5/201	214/17872	0.0943679050141553	0.244178801547213	0.175345858513534	MCTP1/SLC1A3/SYN1/STX11/SLC1A2	5
GOBP_BRANCHING_MORPHOGENESIS_OF_AN_EPITHELIAL_TUBE	GOBP_BRANCHING_MORPHOGENESIS_OF_AN_EPITHELIAL_TUBE	GOBP_BRANCHING_MORPHOGENESIS_OF_AN_EPITHELIAL_TUBE	4/201	153/17872	0.0943712376329668	0.244178801547213	0.175345858513534	CLIC4/AREG/TNF/CSMD1	4
GOBP_ADIPOSE_TISSUE_DEVELOPMENT	GOBP_ADIPOSE_TISSUE_DEVELOPMENT	GOBP_ADIPOSE_TISSUE_DEVELOPMENT	2/201	46/17872	0.094462734490608	0.244178801547213	0.175345858513534	NAMPT/KLF7	2
GOBP_REGULATION_OF_MITOTIC_SISTER_CHROMATID_SEGREGATION	GOBP_REGULATION_OF_MITOTIC_SISTER_CHROMATID_SEGREGATION	GOBP_REGULATION_OF_MITOTIC_SISTER_CHROMATID_SEGREGATION	2/201	46/17872	0.094462734490608	0.244178801547213	0.175345858513534	DUSP1/TEX14	2
GOBP_AMEBOIDAL_TYPE_CELL_MIGRATION	GOBP_AMEBOIDAL_TYPE_CELL_MIGRATION	GOBP_AMEBOIDAL_TYPE_CELL_MIGRATION	9/201	482/17872	0.0949652777014273	0.245265301630613	0.176126078945003	ZFAND5/THBS1/PTEN/RIN2/TNF/PRKCE/SDC4/NFE2L2/PTGS2	9
GOBP_REGULATION_OF_NOTCH_SIGNALING_PATHWAY	GOBP_REGULATION_OF_NOTCH_SIGNALING_PATHWAY	GOBP_REGULATION_OF_NOTCH_SIGNALING_PATHWAY	3/201	97/17872	0.096229741626497	0.24810139954351	0.178162693181023	NFKBIA/BCL6/STAT3	3
GOBP_RESPONSE_TO_ALKALOID	GOBP_RESPONSE_TO_ALKALOID	GOBP_RESPONSE_TO_ALKALOID	3/201	97/17872	0.096229741626497	0.24810139954351	0.178162693181023	SLC1A3/PRKCE/SLC1A2	3
GOBP_CARBOXYLIC_ACID_TRANSPORT	GOBP_CARBOXYLIC_ACID_TRANSPORT	GOBP_CARBOXYLIC_ACID_TRANSPORT	6/201	280/17872	0.0968996713591392	0.249612883993361	0.179248096732886	IL1B/IL1A/AQP9/SLC1A3/TNF/SLC1A2	6
GOBP_CELL_CYCLE_G2_M_PHASE_TRANSITION	GOBP_CELL_CYCLE_G2_M_PHASE_TRANSITION	GOBP_CELL_CYCLE_G2_M_PHASE_TRANSITION	4/201	155/17872	0.0978081499370304	0.251255427396303	0.180427614288504	GPR132/ENSA/PLK3/BACH1	4
GOBP_HETEROPHILIC_CELL_CELL_ADHESION_VIA_PLASMA_MEMBRANE_CELL_ADHESION_MOLECULES	GOBP_HETEROPHILIC_CELL_CELL_ADHESION_VIA_PLASMA_MEMBRANE_CELL_ADHESION_MOLECULES	GOBP_HETEROPHILIC_CELL_CELL_ADHESION_VIA_PLASMA_MEMBRANE_CELL_ADHESION_MOLECULES	2/201	47/17872	0.0979584519148175	0.251255427396303	0.180427614288504	ICAM1/IL1RAPL1	2
GOBP_PHENOL_CONTAINING_COMPOUND_BIOSYNTHETIC_PROCESS	GOBP_PHENOL_CONTAINING_COMPOUND_BIOSYNTHETIC_PROCESS	GOBP_PHENOL_CONTAINING_COMPOUND_BIOSYNTHETIC_PROCESS	2/201	47/17872	0.0979584519148175	0.251255427396303	0.180427614288504	GCH1/RAPGEF2	2
GOBP_RESPONSE_TO_COCAINE	GOBP_RESPONSE_TO_COCAINE	GOBP_RESPONSE_TO_COCAINE	2/201	47/17872	0.0979584519148175	0.251255427396303	0.180427614288504	SLC1A3/SLC1A2	2
GOBP_RESPONSE_TO_NERVE_GROWTH_FACTOR	GOBP_RESPONSE_TO_NERVE_GROWTH_FACTOR	GOBP_RESPONSE_TO_NERVE_GROWTH_FACTOR	2/201	47/17872	0.0979584519148175	0.251255427396303	0.180427614288504	EHD1/RAPGEF2	2
GOBP_ENDOTHELIAL_CELL_MIGRATION	GOBP_ENDOTHELIAL_CELL_MIGRATION	GOBP_ENDOTHELIAL_CELL_MIGRATION	6/201	281/17872	0.098141008317662	0.251507412209266	0.180608565677738	THBS1/PTEN/RIN2/TNF/NFE2L2/PTGS2	6
GOBP_REGULATION_OF_DENDRITE_DEVELOPMENT	GOBP_REGULATION_OF_DENDRITE_DEVELOPMENT	GOBP_REGULATION_OF_DENDRITE_DEVELOPMENT	3/201	98/17872	0.0984876623597362	0.251962861765946	0.180935625983627	SIPA1L1/RAPGEF2/IL1RAPL1	3
GOBP_TYPE_I_INTERFERON_PRODUCTION	GOBP_TYPE_I_INTERFERON_PRODUCTION	GOBP_TYPE_I_INTERFERON_PRODUCTION	3/201	98/17872	0.0984876623597362	0.251962861765946	0.180935625983627	REL/IRF1/TLR4	3
GOBP_RAS_PROTEIN_SIGNAL_TRANSDUCTION	GOBP_RAS_PROTEIN_SIGNAL_TRANSDUCTION	GOBP_RAS_PROTEIN_SIGNAL_TRANSDUCTION	7/201	348/17872	0.0986601869932133	0.252187950129182	0.181097262915428	RASGEF1B/RHOH/BCL6/RAPGEF2/DENND4A/AKAP13/ABL2	7
GOBP_NEGATIVE_REGULATION_OF_ION_TRANSPORT	GOBP_NEGATIVE_REGULATION_OF_ION_TRANSPORT	GOBP_NEGATIVE_REGULATION_OF_ION_TRANSPORT	4/201	156/17872	0.0995483955607521	0.253805866630533	0.182259095785992	SESTD1/TNF/PRKCE/PTGS2	4
GOBP_PLASMA_MEMBRANE_ORGANIZATION	GOBP_PLASMA_MEMBRANE_ORGANIZATION	GOBP_PLASMA_MEMBRANE_ORGANIZATION	4/201	156/17872	0.0995483955607521	0.253805866630533	0.182259095785992	PTEN/SNX9/MTSS1/VMP1	4
GOBP_REGULATION_OF_CALCIUM_ION_TRANSMEMBRANE_TRANSPORT	GOBP_REGULATION_OF_CALCIUM_ION_TRANSMEMBRANE_TRANSPORT	GOBP_REGULATION_OF_CALCIUM_ION_TRANSMEMBRANE_TRANSPORT	4/201	156/17872	0.0995483955607521	0.253805866630533	0.182259095785992	PDE4B/SESTD1/PRKCE/VMP1	4
GOBP_MUSCLE_CONTRACTION	GOBP_MUSCLE_CONTRACTION	GOBP_MUSCLE_CONTRACTION	7/201	349/17872	0.0997761024023267	0.254169183147857	0.182519994955939	PDE4B/ATP1A1/TNF/PTGS2/KCNJ2/KCNMA1/PKP2	7
GOBP_CARDIAC_CONDUCTION	GOBP_CARDIAC_CONDUCTION	GOBP_CARDIAC_CONDUCTION	3/201	99/17872	0.100766946151561	0.256255584288241	0.184018248681677	ATP1A1/KCNJ2/PKP2	3
GOBP_MESONEPHROS_DEVELOPMENT	GOBP_MESONEPHROS_DEVELOPMENT	GOBP_MESONEPHROS_DEVELOPMENT	3/201	99/17872	0.100766946151561	0.256255584288241	0.184018248681677	ZBTB16/FMN1/SDC4	3
GOBP_OSSIFICATION	GOBP_OSSIFICATION	GOBP_OSSIFICATION	8/201	419/17872	0.101403201343404	0.256346765378045	0.184083726218509	ZBTB16/HNRNPC/AREG/TNF/CCL3/TNFAIP6/PTGS2/SGMS2	8
GOBP_CALCINEURIN_MEDIATED_SIGNALING	GOBP_CALCINEURIN_MEDIATED_SIGNALING	GOBP_CALCINEURIN_MEDIATED_SIGNALING	2/201	48/17872	0.101490288270691	0.256346765378045	0.184083726218509	TNF/NFAT5	2
GOBP_EXOCRINE_SYSTEM_DEVELOPMENT	GOBP_EXOCRINE_SYSTEM_DEVELOPMENT	GOBP_EXOCRINE_SYSTEM_DEVELOPMENT	2/201	48/17872	0.101490288270691	0.256346765378045	0.184083726218509	INSR/TNF	2
GOBP_FACE_DEVELOPMENT	GOBP_FACE_DEVELOPMENT	GOBP_FACE_DEVELOPMENT	2/201	48/17872	0.101490288270691	0.256346765378045	0.184083726218509	ALDH1A2/ZFAND5	2
GOBP_REGULATION_OF_ENDOTHELIAL_CELL_DIFFERENTIATION	GOBP_REGULATION_OF_ENDOTHELIAL_CELL_DIFFERENTIATION	GOBP_REGULATION_OF_ENDOTHELIAL_CELL_DIFFERENTIATION	2/201	48/17872	0.101490288270691	0.256346765378045	0.184083726218509	IL1B/TNF	2
GOBP_REGULATION_OF_MYELINATION	GOBP_REGULATION_OF_MYELINATION	GOBP_REGULATION_OF_MYELINATION	2/201	48/17872	0.101490288270691	0.256346765378045	0.184083726218509	PTEN/TNF	2
GOBP_REGULATION_OF_PLATELET_ACTIVATION	GOBP_REGULATION_OF_PLATELET_ACTIVATION	GOBP_REGULATION_OF_PLATELET_ACTIVATION	2/201	48/17872	0.101490288270691	0.256346765378045	0.184083726218509	PLEK/TLR4	2
GOBP_REGULATION_OF_SYSTEMIC_ARTERIAL_BLOOD_PRESSURE_MEDIATED_BY_A_CHEMICAL_SIGNAL	GOBP_REGULATION_OF_SYSTEMIC_ARTERIAL_BLOOD_PRESSURE_MEDIATED_BY_A_CHEMICAL_SIGNAL	GOBP_REGULATION_OF_SYSTEMIC_ARTERIAL_BLOOD_PRESSURE_MEDIATED_BY_A_CHEMICAL_SIGNAL	2/201	48/17872	0.101490288270691	0.256346765378045	0.184083726218509	SOD2/ECE1	2
GOBP_CELLULAR_RESPONSE_TO_INORGANIC_SUBSTANCE	GOBP_CELLULAR_RESPONSE_TO_INORGANIC_SUBSTANCE	GOBP_CELLULAR_RESPONSE_TO_INORGANIC_SUBSTANCE	5/201	220/17872	0.103020519861998	0.259417908749059	0.186289127619435	CFLAR/CLIC4/NFE2L2/PTGS2/MT2A	5
GOBP_AMINO_ACID_TRANSMEMBRANE_TRANSPORT	GOBP_AMINO_ACID_TRANSMEMBRANE_TRANSPORT	GOBP_AMINO_ACID_TRANSMEMBRANE_TRANSPORT	3/201	100/17872	0.103067309584506	0.259417908749059	0.186289127619435	SLC1A3/TNF/SLC1A2	3
GOBP_NEURON_DEATH	GOBP_NEURON_DEATH	GOBP_NEURON_DEATH	7/201	352/17872	0.10316549128642	0.259417908749059	0.186289127619435	SOD2/HIPK2/TNF/CCL3/BTG2/TLR4/EGR1	7
GOBP_REGULATION_OF_CATION_TRANSMEMBRANE_TRANSPORT	GOBP_REGULATION_OF_CATION_TRANSMEMBRANE_TRANSPORT	GOBP_REGULATION_OF_CATION_TRANSMEMBRANE_TRANSPORT	7/201	353/17872	0.104309120570258	0.259417908749059	0.186289127619435	PDE4B/KCNIP4/SESTD1/IFNGR2/PRKCE/KCNJ2/VMP1	7
GOBP_NEGATIVE_REGULATION_OF_MUSCLE_CELL_APOPTOTIC_PROCESS	GOBP_NEGATIVE_REGULATION_OF_MUSCLE_CELL_APOPTOTIC_PROCESS	GOBP_NEGATIVE_REGULATION_OF_MUSCLE_CELL_APOPTOTIC_PROCESS	2/201	49/17872	0.105056999132771	0.259417908749059	0.186289127619435	CFLAR/NFE2L2	2
GOBP_NEGATIVE_REGULATION_OF_UBIQUITIN_DEPENDENT_PROTEIN_CATABOLIC_PROCESS	GOBP_NEGATIVE_REGULATION_OF_UBIQUITIN_DEPENDENT_PROTEIN_CATABOLIC_PROCESS	GOBP_NEGATIVE_REGULATION_OF_UBIQUITIN_DEPENDENT_PROTEIN_CATABOLIC_PROCESS	2/201	49/17872	0.105056999132771	0.259417908749059	0.186289127619435	N4BP1/HIPK2	2
GOBP_NEUROMUSCULAR_PROCESS_CONTROLLING_BALANCE	GOBP_NEUROMUSCULAR_PROCESS_CONTROLLING_BALANCE	GOBP_NEUROMUSCULAR_PROCESS_CONTROLLING_BALANCE	2/201	49/17872	0.105056999132771	0.259417908749059	0.186289127619435	SLC1A3/RBFOX2	2
GOBP_OVULATION_CYCLE_PROCESS	GOBP_OVULATION_CYCLE_PROCESS	GOBP_OVULATION_CYCLE_PROCESS	2/201	49/17872	0.105056999132771	0.259417908749059	0.186289127619435	EREG/TNFAIP6	2
GOBP_POSITIVE_REGULATION_OF_ANION_TRANSPORT	GOBP_POSITIVE_REGULATION_OF_ANION_TRANSPORT	GOBP_POSITIVE_REGULATION_OF_ANION_TRANSPORT	2/201	49/17872	0.105056999132771	0.259417908749059	0.186289127619435	IL1B/IL1A	2
GOBP_REGULATION_OF_CARDIAC_MUSCLE_CELL_PROLIFERATION	GOBP_REGULATION_OF_CARDIAC_MUSCLE_CELL_PROLIFERATION	GOBP_REGULATION_OF_CARDIAC_MUSCLE_CELL_PROLIFERATION	2/201	49/17872	0.105056999132771	0.259417908749059	0.186289127619435	PTEN/SAV1	2
GOBP_REGULATION_OF_FATTY_ACID_BIOSYNTHETIC_PROCESS	GOBP_REGULATION_OF_FATTY_ACID_BIOSYNTHETIC_PROCESS	GOBP_REGULATION_OF_FATTY_ACID_BIOSYNTHETIC_PROCESS	2/201	49/17872	0.105056999132771	0.259417908749059	0.186289127619435	IL1B/PTGS2	2
GOBP_RESPONSE_TO_NICOTINE	GOBP_RESPONSE_TO_NICOTINE	GOBP_RESPONSE_TO_NICOTINE	2/201	49/17872	0.105056999132771	0.259417908749059	0.186289127619435	NFKB1/TNF	2
GOBP_T_CELL_SELECTION	GOBP_T_CELL_SELECTION	GOBP_T_CELL_SELECTION	2/201	49/17872	0.105056999132771	0.259417908749059	0.186289127619435	PTPN2/STAT3	2
GOBP_VASCULAR_ENDOTHELIAL_CELL_PROLIFERATION	GOBP_VASCULAR_ENDOTHELIAL_CELL_PROLIFERATION	GOBP_VASCULAR_ENDOTHELIAL_CELL_PROLIFERATION	2/201	49/17872	0.105056999132771	0.259417908749059	0.186289127619435	STAT3/FLT1	2
GOBP_REGULATION_OF_CYCLIN_DEPENDENT_PROTEIN_KINASE_ACTIVITY	GOBP_REGULATION_OF_CYCLIN_DEPENDENT_PROTEIN_KINASE_ACTIVITY	GOBP_REGULATION_OF_CYCLIN_DEPENDENT_PROTEIN_KINASE_ACTIVITY	3/201	101/17872	0.105388467549716	0.259417908749059	0.186289127619435	TNFAIP3/PTEN/CCND3	3
GOBP_REGULATION_OF_ORGAN_GROWTH	GOBP_REGULATION_OF_ORGAN_GROWTH	GOBP_REGULATION_OF_ORGAN_GROWTH	3/201	101/17872	0.105388467549716	0.259417908749059	0.186289127619435	PTEN/DUSP6/SAV1	3
GOBP_DNA_DEPENDENT_DNA_REPLICATION	GOBP_DNA_DEPENDENT_DNA_REPLICATION	GOBP_DNA_DEPENDENT_DNA_REPLICATION	4/201	160/17872	0.106652256672638	0.259417908749059	0.186289127619435	OOEP/BCL6/BAZ1A/HELB	4
GOBP_ADENYLATE_CYCLASE_ACTIVATING_DOPAMINE_RECEPTOR_SIGNALING_PATHWAY	GOBP_ADENYLATE_CYCLASE_ACTIVATING_DOPAMINE_RECEPTOR_SIGNALING_PATHWAY	GOBP_ADENYLATE_CYCLASE_ACTIVATING_DOPAMINE_RECEPTOR_SIGNALING_PATHWAY	1/201	10/17872	0.106967491706786	0.259417908749059	0.186289127619435	GNG2	1
GOBP_ASTRAL_MICROTUBULE_ORGANIZATION	GOBP_ASTRAL_MICROTUBULE_ORGANIZATION	GOBP_ASTRAL_MICROTUBULE_ORGANIZATION	1/201	10/17872	0.106967491706786	0.259417908749059	0.186289127619435	LIMK2	1
GOBP_CELL_PROLIFERATION_INVOLVED_IN_METANEPHROS_DEVELOPMENT	GOBP_CELL_PROLIFERATION_INVOLVED_IN_METANEPHROS_DEVELOPMENT	GOBP_CELL_PROLIFERATION_INVOLVED_IN_METANEPHROS_DEVELOPMENT	1/201	10/17872	0.106967491706786	0.259417908749059	0.186289127619435	EGR1	1
GOBP_DESMOSOME_ORGANIZATION	GOBP_DESMOSOME_ORGANIZATION	GOBP_DESMOSOME_ORGANIZATION	1/201	10/17872	0.106967491706786	0.259417908749059	0.186289127619435	PKP2	1
GOBP_DNA_INTEGRATION	GOBP_DNA_INTEGRATION	GOBP_DNA_INTEGRATION	1/201	10/17872	0.106967491706786	0.259417908749059	0.186289127619435	THAP9	1
GOBP_EMBRYONIC_VISCEROCRANIUM_MORPHOGENESIS	GOBP_EMBRYONIC_VISCEROCRANIUM_MORPHOGENESIS	GOBP_EMBRYONIC_VISCEROCRANIUM_MORPHOGENESIS	1/201	10/17872	0.106967491706786	0.259417908749059	0.186289127619435	CHST11	1
GOBP_FOLIC_ACID_CONTAINING_COMPOUND_BIOSYNTHETIC_PROCESS	GOBP_FOLIC_ACID_CONTAINING_COMPOUND_BIOSYNTHETIC_PROCESS	GOBP_FOLIC_ACID_CONTAINING_COMPOUND_BIOSYNTHETIC_PROCESS	1/201	10/17872	0.106967491706786	0.259417908749059	0.186289127619435	GCH1	1
GOBP_GAS_HOMEOSTASIS	GOBP_GAS_HOMEOSTASIS	GOBP_GAS_HOMEOSTASIS	1/201	10/17872	0.106967491706786	0.259417908749059	0.186289127619435	SOD2	1
GOBP_HYALURONAN_CATABOLIC_PROCESS	GOBP_HYALURONAN_CATABOLIC_PROCESS	GOBP_HYALURONAN_CATABOLIC_PROCESS	1/201	10/17872	0.106967491706786	0.259417908749059	0.186289127619435	CD44	1
GOBP_MANGANESE_ION_TRANSMEMBRANE_TRANSPORT	GOBP_MANGANESE_ION_TRANSMEMBRANE_TRANSPORT	GOBP_MANGANESE_ION_TRANSMEMBRANE_TRANSPORT	1/201	10/17872	0.106967491706786	0.259417908749059	0.186289127619435	TMEM165	1
GOBP_NAD_BIOSYNTHESIS_VIA_NICOTINAMIDE_RIBOSIDE_SALVAGE_PATHWAY	GOBP_NAD_BIOSYNTHESIS_VIA_NICOTINAMIDE_RIBOSIDE_SALVAGE_PATHWAY	GOBP_NAD_BIOSYNTHESIS_VIA_NICOTINAMIDE_RIBOSIDE_SALVAGE_PATHWAY	1/201	10/17872	0.106967491706786	0.259417908749059	0.186289127619435	NAMPT	1
GOBP_NEGATIVE_REGULATION_OF_EXCITATORY_POSTSYNAPTIC_POTENTIAL	GOBP_NEGATIVE_REGULATION_OF_EXCITATORY_POSTSYNAPTIC_POTENTIAL	GOBP_NEGATIVE_REGULATION_OF_EXCITATORY_POSTSYNAPTIC_POTENTIAL	1/201	10/17872	0.106967491706786	0.259417908749059	0.186289127619435	PTEN	1
GOBP_NEGATIVE_REGULATION_OF_FIBRINOLYSIS	GOBP_NEGATIVE_REGULATION_OF_FIBRINOLYSIS	GOBP_NEGATIVE_REGULATION_OF_FIBRINOLYSIS	1/201	10/17872	0.106967491706786	0.259417908749059	0.186289127619435	THBS1	1
GOBP_NEGATIVE_REGULATION_OF_PROTEIN_EXIT_FROM_ENDOPLASMIC_RETICULUM	GOBP_NEGATIVE_REGULATION_OF_PROTEIN_EXIT_FROM_ENDOPLASMIC_RETICULUM	GOBP_NEGATIVE_REGULATION_OF_PROTEIN_EXIT_FROM_ENDOPLASMIC_RETICULUM	1/201	10/17872	0.106967491706786	0.259417908749059	0.186289127619435	UBAC2	1
GOBP_NEURON_PROJECTION_MAINTENANCE	GOBP_NEURON_PROJECTION_MAINTENANCE	GOBP_NEURON_PROJECTION_MAINTENANCE	1/201	10/17872	0.106967491706786	0.259417908749059	0.186289127619435	INSR	1
GOBP_NK_T_CELL_DIFFERENTIATION	GOBP_NK_T_CELL_DIFFERENTIATION	GOBP_NK_T_CELL_DIFFERENTIATION	1/201	10/17872	0.106967491706786	0.259417908749059	0.186289127619435	ZBTB16	1
GOBP_NUCLEOBASE_TRANSPORT	GOBP_NUCLEOBASE_TRANSPORT	GOBP_NUCLEOBASE_TRANSPORT	1/201	10/17872	0.106967491706786	0.259417908749059	0.186289127619435	AQP9	1
GOBP_POSITIVE_REGULATION_OF_B_CELL_RECEPTOR_SIGNALING_PATHWAY	GOBP_POSITIVE_REGULATION_OF_B_CELL_RECEPTOR_SIGNALING_PATHWAY	GOBP_POSITIVE_REGULATION_OF_B_CELL_RECEPTOR_SIGNALING_PATHWAY	1/201	10/17872	0.106967491706786	0.259417908749059	0.186289127619435	PRKCH	1
GOBP_POSITIVE_REGULATION_OF_MHC_CLASS_II_BIOSYNTHETIC_PROCESS	GOBP_POSITIVE_REGULATION_OF_MHC_CLASS_II_BIOSYNTHETIC_PROCESS	GOBP_POSITIVE_REGULATION_OF_MHC_CLASS_II_BIOSYNTHETIC_PROCESS	1/201	10/17872	0.106967491706786	0.259417908749059	0.186289127619435	TLR4	1
GOBP_POSITIVE_REGULATION_OF_MICROGLIAL_CELL_ACTIVATION	GOBP_POSITIVE_REGULATION_OF_MICROGLIAL_CELL_ACTIVATION	GOBP_POSITIVE_REGULATION_OF_MICROGLIAL_CELL_ACTIVATION	1/201	10/17872	0.106967491706786	0.259417908749059	0.186289127619435	CCL3	1
GOBP_PROTEIN_K11_LINKED_DEUBIQUITINATION	GOBP_PROTEIN_K11_LINKED_DEUBIQUITINATION	GOBP_PROTEIN_K11_LINKED_DEUBIQUITINATION	1/201	10/17872	0.106967491706786	0.259417908749059	0.186289127619435	TNFAIP3	1
GOBP_REGULATION_OF_GLUCOCORTICOID_METABOLIC_PROCESS	GOBP_REGULATION_OF_GLUCOCORTICOID_METABOLIC_PROCESS	GOBP_REGULATION_OF_GLUCOCORTICOID_METABOLIC_PROCESS	1/201	10/17872	0.106967491706786	0.259417908749059	0.186289127619435	ATP1A1	1
GOBP_REGULATION_OF_LYSOSOMAL_PROTEIN_CATABOLIC_PROCESS	GOBP_REGULATION_OF_LYSOSOMAL_PROTEIN_CATABOLIC_PROCESS	GOBP_REGULATION_OF_LYSOSOMAL_PROTEIN_CATABOLIC_PROCESS	1/201	10/17872	0.106967491706786	0.259417908749059	0.186289127619435	LDLR	1
GOBP_REGULATION_OF_MATRIX_METALLOPEPTIDASE_SECRETION	GOBP_REGULATION_OF_MATRIX_METALLOPEPTIDASE_SECRETION	GOBP_REGULATION_OF_MATRIX_METALLOPEPTIDASE_SECRETION	1/201	10/17872	0.106967491706786	0.259417908749059	0.186289127619435	TLR4	1
GOBP_REGULATION_OF_NITRIC_OXIDE_MEDIATED_SIGNAL_TRANSDUCTION	GOBP_REGULATION_OF_NITRIC_OXIDE_MEDIATED_SIGNAL_TRANSDUCTION	GOBP_REGULATION_OF_NITRIC_OXIDE_MEDIATED_SIGNAL_TRANSDUCTION	1/201	10/17872	0.106967491706786	0.259417908749059	0.186289127619435	THBS1	1
GOBP_REGULATION_OF_PHOSPHATIDYLCHOLINE_METABOLIC_PROCESS	GOBP_REGULATION_OF_PHOSPHATIDYLCHOLINE_METABOLIC_PROCESS	GOBP_REGULATION_OF_PHOSPHATIDYLCHOLINE_METABOLIC_PROCESS	1/201	10/17872	0.106967491706786	0.259417908749059	0.186289127619435	LDLR	1
GOBP_RESPONSE_TO_LIPOTEICHOIC_ACID	GOBP_RESPONSE_TO_LIPOTEICHOIC_ACID	GOBP_RESPONSE_TO_LIPOTEICHOIC_ACID	1/201	10/17872	0.106967491706786	0.259417908749059	0.186289127619435	TLR4	1
GOBP_RESPONSE_TO_NITROSATIVE_STRESS	GOBP_RESPONSE_TO_NITROSATIVE_STRESS	GOBP_RESPONSE_TO_NITROSATIVE_STRESS	1/201	10/17872	0.106967491706786	0.259417908749059	0.186289127619435	DUSP6	1
GOBP_SPHINGOMYELIN_BIOSYNTHETIC_PROCESS	GOBP_SPHINGOMYELIN_BIOSYNTHETIC_PROCESS	GOBP_SPHINGOMYELIN_BIOSYNTHETIC_PROCESS	1/201	10/17872	0.106967491706786	0.259417908749059	0.186289127619435	SGMS2	1
GOBP_T_CELL_ACTIVATION_VIA_T_CELL_RECEPTOR_CONTACT_WITH_ANTIGEN_BOUND_TO_MHC_MOLECULE_ON_ANTIGEN_PRESENTING_CELL	GOBP_T_CELL_ACTIVATION_VIA_T_CELL_RECEPTOR_CONTACT_WITH_ANTIGEN_BOUND_TO_MHC_MOLECULE_ON_ANTIGEN_PRESENTING_CELL	GOBP_T_CELL_ACTIVATION_VIA_T_CELL_RECEPTOR_CONTACT_WITH_ANTIGEN_BOUND_TO_MHC_MOLECULE_ON_ANTIGEN_PRESENTING_CELL	1/201	10/17872	0.106967491706786	0.259417908749059	0.186289127619435	ICAM1	1
GOBP_URINARY_TRACT_SMOOTH_MUSCLE_CONTRACTION	GOBP_URINARY_TRACT_SMOOTH_MUSCLE_CONTRACTION	GOBP_URINARY_TRACT_SMOOTH_MUSCLE_CONTRACTION	1/201	10/17872	0.106967491706786	0.259417908749059	0.186289127619435	KCNMA1	1
GOBP_VIRION_ATTACHMENT_TO_HOST_CELL	GOBP_VIRION_ATTACHMENT_TO_HOST_CELL	GOBP_VIRION_ATTACHMENT_TO_HOST_CELL	1/201	10/17872	0.106967491706786	0.259417908749059	0.186289127619435	ICAM1	1
GOBP_REGULATION_OF_INTRACELLULAR_PROTEIN_TRANSPORT	GOBP_REGULATION_OF_INTRACELLULAR_PROTEIN_TRANSPORT	GOBP_REGULATION_OF_INTRACELLULAR_PROTEIN_TRANSPORT	5/201	223/17872	0.107490415912195	0.260420573637417	0.187009145633024	IL1B/PTPN1/UBAC2/PLK3/PTGS2	5
GOBP_REGULATION_OF_MEMBRANE_POTENTIAL	GOBP_REGULATION_OF_MEMBRANE_POTENTIAL	GOBP_REGULATION_OF_MEMBRANE_POTENTIAL	8/201	425/17872	0.107663483125393	0.260420573637417	0.187009145633024	SOD2/PMAIP1/PTEN/ATP1A1/TNF/KCNJ2/KCNMA1/PKP2	8
GOBP_NEGATIVE_REGULATION_OF_SMALL_MOLECULE_METABOLIC_PROCESS	GOBP_NEGATIVE_REGULATION_OF_SMALL_MOLECULE_METABOLIC_PROCESS	GOBP_NEGATIVE_REGULATION_OF_SMALL_MOLECULE_METABOLIC_PROCESS	3/201	102/17872	0.10773013337867	0.260420573637417	0.187009145633024	NFKB1/STAT3/PLEK	3
GOBP_REGULATION_OF_EPITHELIAL_TO_MESENCHYMAL_TRANSITION	GOBP_REGULATION_OF_EPITHELIAL_TO_MESENCHYMAL_TRANSITION	GOBP_REGULATION_OF_EPITHELIAL_TO_MESENCHYMAL_TRANSITION	3/201	102/17872	0.10773013337867	0.260420573637417	0.187009145633024	IL1B/PTEN/LDLRAD4	3
GOBP_ACTIVATED_T_CELL_PROLIFERATION	GOBP_ACTIVATED_T_CELL_PROLIFERATION	GOBP_ACTIVATED_T_CELL_PROLIFERATION	2/201	50/17872	0.108657363244958	0.261602029507433	0.187857554227509	SLAMF1/IL2RA	2
GOBP_CAMP_MEDIATED_SIGNALING	GOBP_CAMP_MEDIATED_SIGNALING	GOBP_CAMP_MEDIATED_SIGNALING	2/201	50/17872	0.108657363244958	0.261602029507433	0.187857554227509	RAPGEF2/ADM	2
GOBP_CELLULAR_RESPONSE_TO_GLUCOSE_STARVATION	GOBP_CELLULAR_RESPONSE_TO_GLUCOSE_STARVATION	GOBP_CELLULAR_RESPONSE_TO_GLUCOSE_STARVATION	2/201	50/17872	0.108657363244958	0.261602029507433	0.187857554227509	PMAIP1/NFE2L2	2
GOBP_POTASSIUM_ION_IMPORT_ACROSS_PLASMA_MEMBRANE	GOBP_POTASSIUM_ION_IMPORT_ACROSS_PLASMA_MEMBRANE	GOBP_POTASSIUM_ION_IMPORT_ACROSS_PLASMA_MEMBRANE	2/201	50/17872	0.108657363244958	0.261602029507433	0.187857554227509	ATP1A1/KCNJ2	2
GOBP_REGULATION_OF_INSULIN_SECRETION_INVOLVED_IN_CELLULAR_RESPONSE_TO_GLUCOSE_STIMULUS	GOBP_REGULATION_OF_INSULIN_SECRETION_INVOLVED_IN_CELLULAR_RESPONSE_TO_GLUCOSE_STIMULUS	GOBP_REGULATION_OF_INSULIN_SECRETION_INVOLVED_IN_CELLULAR_RESPONSE_TO_GLUCOSE_STIMULUS	2/201	50/17872	0.108657363244958	0.261602029507433	0.187857554227509	PRKCE/KLF7	2
GOBP_REGULATION_OF_CELL_KILLING	GOBP_REGULATION_OF_CELL_KILLING	GOBP_REGULATION_OF_CELL_KILLING	3/201	103/17872	0.11009201897154	0.264415855549199	0.189878174936083	SERPINB9/CD55/ICAM1	3
GOBP_REGULATION_OF_PROTEIN_LOCALIZATION_TO_PLASMA_MEMBRANE	GOBP_REGULATION_OF_PROTEIN_LOCALIZATION_TO_PLASMA_MEMBRANE	GOBP_REGULATION_OF_PROTEIN_LOCALIZATION_TO_PLASMA_MEMBRANE	3/201	103/17872	0.11009201897154	0.264415855549199	0.189878174936083	TNF/PRKCE/PRKCH	3
GOBP_TRIGLYCERIDE_METABOLIC_PROCESS	GOBP_TRIGLYCERIDE_METABOLIC_PROCESS	GOBP_TRIGLYCERIDE_METABOLIC_PROCESS	3/201	103/17872	0.11009201897154	0.264415855549199	0.189878174936083	ACSL1/LDLR/GK	3
GOBP_POSTSYNAPSE_ORGANIZATION	GOBP_POSTSYNAPSE_ORGANIZATION	GOBP_POSTSYNAPSE_ORGANIZATION	4/201	162/17872	0.110288433703884	0.264674495364993	0.19006390531177	SIPA1L1/PTEN/INSR/IL1RAPL1	4
GOBP_GLIAL_CELL_MIGRATION	GOBP_GLIAL_CELL_MIGRATION	GOBP_GLIAL_CELL_MIGRATION	2/201	51/17872	0.112290182161103	0.267890185903518	0.192373106661841	GPR183/CCL3	2
GOBP_NEGATIVE_REGULATION_OF_CARBOHYDRATE_METABOLIC_PROCESS	GOBP_NEGATIVE_REGULATION_OF_CARBOHYDRATE_METABOLIC_PROCESS	GOBP_NEGATIVE_REGULATION_OF_CARBOHYDRATE_METABOLIC_PROCESS	2/201	51/17872	0.112290182161103	0.267890185903518	0.192373106661841	STAT3/PLEK	2
GOBP_NEUTRAL_AMINO_ACID_TRANSPORT	GOBP_NEUTRAL_AMINO_ACID_TRANSPORT	GOBP_NEUTRAL_AMINO_ACID_TRANSPORT	2/201	51/17872	0.112290182161103	0.267890185903518	0.192373106661841	SLC1A3/SLC1A2	2
GOBP_SYNAPTIC_TRANSMISSION_GABAERGIC	GOBP_SYNAPTIC_TRANSMISSION_GABAERGIC	GOBP_SYNAPTIC_TRANSMISSION_GABAERGIC	2/201	51/17872	0.112290182161103	0.267890185903518	0.192373106661841	PTEN/PRKCE	2
GOBP_POSITIVE_REGULATION_OF_CELL_JUNCTION_ASSEMBLY	GOBP_POSITIVE_REGULATION_OF_CELL_JUNCTION_ASSEMBLY	GOBP_POSITIVE_REGULATION_OF_CELL_JUNCTION_ASSEMBLY	3/201	104/17872	0.112473834922275	0.267890185903518	0.192373106661841	FMN1/IL1RAPL1/SDC4	3
GOBP_REGULATION_OF_MRNA_METABOLIC_PROCESS	GOBP_REGULATION_OF_MRNA_METABOLIC_PROCESS	GOBP_REGULATION_OF_MRNA_METABOLIC_PROCESS	6/201	293/17872	0.113691086725105	0.267890185903518	0.192373106661841	MBNL1/HNRNPC/ZFP36/SCGB1A1/RBFOX2/BTG2	6
GOBP_REGULATION_OF_NEUROGENESIS	GOBP_REGULATION_OF_NEUROGENESIS	GOBP_REGULATION_OF_NEUROGENESIS	7/201	361/17872	0.113704865588676	0.267890185903518	0.192373106661841	IL1B/PTEN/LDLR/RAPGEF2/TNF/IL1RAPL1/PRKCH	7
GOBP_NEGATIVE_REGULATION_OF_ION_TRANSMEMBRANE_TRANSPORT	GOBP_NEGATIVE_REGULATION_OF_ION_TRANSMEMBRANE_TRANSPORT	GOBP_NEGATIVE_REGULATION_OF_ION_TRANSMEMBRANE_TRANSPORT	3/201	105/17872	0.114875290640452	0.267890185903518	0.192373106661841	SESTD1/TNF/PRKCE	3
GOBP_PROTEIN_LOCALIZATION_TO_NUCLEUS	GOBP_PROTEIN_LOCALIZATION_TO_NUCLEUS	GOBP_PROTEIN_LOCALIZATION_TO_NUCLEUS	6/201	294/17872	0.115040598953947	0.267890185903518	0.192373106661841	NFKBIA/ZBTB16/LIMK2/PTGS2/GBP2/STAT3	6
GOBP_APOPTOTIC_CELL_CLEARANCE	GOBP_APOPTOTIC_CELL_CLEARANCE	GOBP_APOPTOTIC_CELL_CLEARANCE	2/201	52/17872	0.115954279890698	0.267890185903518	0.192373106661841	THBS1/RHOH	2
GOBP_ESTABLISHMENT_OR_MAINTENANCE_OF_BIPOLAR_CELL_POLARITY	GOBP_ESTABLISHMENT_OR_MAINTENANCE_OF_BIPOLAR_CELL_POLARITY	GOBP_ESTABLISHMENT_OR_MAINTENANCE_OF_BIPOLAR_CELL_POLARITY	2/201	52/17872	0.115954279890698	0.267890185903518	0.192373106661841	OOEP/CLIC4	2
GOBP_FC_RECEPTOR_SIGNALING_PATHWAY	GOBP_FC_RECEPTOR_SIGNALING_PATHWAY	GOBP_FC_RECEPTOR_SIGNALING_PATHWAY	2/201	52/17872	0.115954279890698	0.267890185903518	0.192373106661841	HCK/PRKCE	2
GOBP_MEMBRANE_REPOLARIZATION	GOBP_MEMBRANE_REPOLARIZATION	GOBP_MEMBRANE_REPOLARIZATION	2/201	52/17872	0.115954279890698	0.267890185903518	0.192373106661841	ATP1A1/KCNJ2	2
GOBP_NEGATIVE_REGULATION_OF_LEUKOCYTE_MIGRATION	GOBP_NEGATIVE_REGULATION_OF_LEUKOCYTE_MIGRATION	GOBP_NEGATIVE_REGULATION_OF_LEUKOCYTE_MIGRATION	2/201	52/17872	0.115954279890698	0.267890185903518	0.192373106661841	DUSP1/TNFAIP6	2
GOBP_POSITIVE_REGULATION_OF_NEURON_APOPTOTIC_PROCESS	GOBP_POSITIVE_REGULATION_OF_NEURON_APOPTOTIC_PROCESS	GOBP_POSITIVE_REGULATION_OF_NEURON_APOPTOTIC_PROCESS	2/201	52/17872	0.115954279890698	0.267890185903518	0.192373106661841	TNF/CCL3	2
GOBP_PRESYNAPSE_ORGANIZATION	GOBP_PRESYNAPSE_ORGANIZATION	GOBP_PRESYNAPSE_ORGANIZATION	2/201	52/17872	0.115954279890698	0.267890185903518	0.192373106661841	PTEN/IL1RAPL1	2
GOBP_SYNAPTIC_VESICLE_LOCALIZATION	GOBP_SYNAPTIC_VESICLE_LOCALIZATION	GOBP_SYNAPTIC_VESICLE_LOCALIZATION	2/201	52/17872	0.115954279890698	0.267890185903518	0.192373106661841	PTEN/SYN1	2
GOBP_ALDITOL_PHOSPHATE_METABOLIC_PROCESS	GOBP_ALDITOL_PHOSPHATE_METABOLIC_PROCESS	GOBP_ALDITOL_PHOSPHATE_METABOLIC_PROCESS	1/201	11/17872	0.117016732226713	0.267890185903518	0.192373106661841	GK	1
GOBP_CELLULAR_RESPONSE_TO_ELECTRICAL_STIMULUS	GOBP_CELLULAR_RESPONSE_TO_ELECTRICAL_STIMULUS	GOBP_CELLULAR_RESPONSE_TO_ELECTRICAL_STIMULUS	1/201	11/17872	0.117016732226713	0.267890185903518	0.192373106661841	PTEN	1
GOBP_CELLULAR_RESPONSE_TO_EPINEPHRINE_STIMULUS	GOBP_CELLULAR_RESPONSE_TO_EPINEPHRINE_STIMULUS	GOBP_CELLULAR_RESPONSE_TO_EPINEPHRINE_STIMULUS	1/201	11/17872	0.117016732226713	0.267890185903518	0.192373106661841	PDE4B	1
GOBP_CORNEA_DEVELOPMENT_IN_CAMERA_TYPE_EYE	GOBP_CORNEA_DEVELOPMENT_IN_CAMERA_TYPE_EYE	GOBP_CORNEA_DEVELOPMENT_IN_CAMERA_TYPE_EYE	1/201	11/17872	0.117016732226713	0.267890185903518	0.192373106661841	LIMK2	1
GOBP_DENDRITIC_CELL_APOPTOTIC_PROCESS	GOBP_DENDRITIC_CELL_APOPTOTIC_PROCESS	GOBP_DENDRITIC_CELL_APOPTOTIC_PROCESS	1/201	11/17872	0.117016732226713	0.267890185903518	0.192373106661841	RAPGEF2	1
GOBP_DITERPENOID_BIOSYNTHETIC_PROCESS	GOBP_DITERPENOID_BIOSYNTHETIC_PROCESS	GOBP_DITERPENOID_BIOSYNTHETIC_PROCESS	1/201	11/17872	0.117016732226713	0.267890185903518	0.192373106661841	ALDH1A2	1
GOBP_ENDOTHELIAL_CELL_MORPHOGENESIS	GOBP_ENDOTHELIAL_CELL_MORPHOGENESIS	GOBP_ENDOTHELIAL_CELL_MORPHOGENESIS	1/201	11/17872	0.117016732226713	0.267890185903518	0.192373106661841	CLIC4	1
GOBP_HEME_TRANSPORT	GOBP_HEME_TRANSPORT	GOBP_HEME_TRANSPORT	1/201	11/17872	0.117016732226713	0.267890185903518	0.192373106661841	FLVCR2	1
GOBP_HORMONE_CATABOLIC_PROCESS	GOBP_HORMONE_CATABOLIC_PROCESS	GOBP_HORMONE_CATABOLIC_PROCESS	1/201	11/17872	0.117016732226713	0.267890185903518	0.192373106661841	ECE1	1
GOBP_INTERLEUKIN_1_ALPHA_PRODUCTION	GOBP_INTERLEUKIN_1_ALPHA_PRODUCTION	GOBP_INTERLEUKIN_1_ALPHA_PRODUCTION	1/201	11/17872	0.117016732226713	0.267890185903518	0.192373106661841	IL1R2	1
GOBP_KYNURENINE_METABOLIC_PROCESS	GOBP_KYNURENINE_METABOLIC_PROCESS	GOBP_KYNURENINE_METABOLIC_PROCESS	1/201	11/17872	0.117016732226713	0.267890185903518	0.192373106661841	KYNU	1
GOBP_LEPTIN_MEDIATED_SIGNALING_PATHWAY	GOBP_LEPTIN_MEDIATED_SIGNALING_PATHWAY	GOBP_LEPTIN_MEDIATED_SIGNALING_PATHWAY	1/201	11/17872	0.117016732226713	0.267890185903518	0.192373106661841	STAT3	1
GOBP_MEMBRANE_HYPERPOLARIZATION	GOBP_MEMBRANE_HYPERPOLARIZATION	GOBP_MEMBRANE_HYPERPOLARIZATION	1/201	11/17872	0.117016732226713	0.267890185903518	0.192373106661841	SOD2	1
GOBP_MIDGUT_DEVELOPMENT	GOBP_MIDGUT_DEVELOPMENT	GOBP_MIDGUT_DEVELOPMENT	1/201	11/17872	0.117016732226713	0.267890185903518	0.192373106661841	ALDH1A2	1
GOBP_MUSCLE_ATROPHY	GOBP_MUSCLE_ATROPHY	GOBP_MUSCLE_ATROPHY	1/201	11/17872	0.117016732226713	0.267890185903518	0.192373106661841	CFLAR	1
GOBP_NEGATIVE_REGULATION_OF_AMYLOID_BETA_CLEARANCE	GOBP_NEGATIVE_REGULATION_OF_AMYLOID_BETA_CLEARANCE	GOBP_NEGATIVE_REGULATION_OF_AMYLOID_BETA_CLEARANCE	1/201	11/17872	0.117016732226713	0.267890185903518	0.192373106661841	TNF	1
GOBP_NEGATIVE_REGULATION_OF_CELLULAR_RESPIRATION	GOBP_NEGATIVE_REGULATION_OF_CELLULAR_RESPIRATION	GOBP_NEGATIVE_REGULATION_OF_CELLULAR_RESPIRATION	1/201	11/17872	0.117016732226713	0.267890185903518	0.192373106661841	TNF	1
GOBP_NEGATIVE_REGULATION_OF_HEMATOPOIETIC_PROGENITOR_CELL_DIFFERENTIATION	GOBP_NEGATIVE_REGULATION_OF_HEMATOPOIETIC_PROGENITOR_CELL_DIFFERENTIATION	GOBP_NEGATIVE_REGULATION_OF_HEMATOPOIETIC_PROGENITOR_CELL_DIFFERENTIATION	1/201	11/17872	0.117016732226713	0.267890185903518	0.192373106661841	NFE2L2	1
GOBP_NEGATIVE_REGULATION_OF_HUMORAL_IMMUNE_RESPONSE_MEDIATED_BY_CIRCULATING_IMMUNOGLOBULIN	GOBP_NEGATIVE_REGULATION_OF_HUMORAL_IMMUNE_RESPONSE_MEDIATED_BY_CIRCULATING_IMMUNOGLOBULIN	GOBP_NEGATIVE_REGULATION_OF_HUMORAL_IMMUNE_RESPONSE_MEDIATED_BY_CIRCULATING_IMMUNOGLOBULIN	1/201	11/17872	0.117016732226713	0.267890185903518	0.192373106661841	CD55	1
GOBP_NEGATIVE_REGULATION_OF_MEMBRANE_POTENTIAL	GOBP_NEGATIVE_REGULATION_OF_MEMBRANE_POTENTIAL	GOBP_NEGATIVE_REGULATION_OF_MEMBRANE_POTENTIAL	1/201	11/17872	0.117016732226713	0.267890185903518	0.192373106661841	PMAIP1	1
GOBP_NEGATIVE_REGULATION_OF_NEURON_MIGRATION	GOBP_NEGATIVE_REGULATION_OF_NEURON_MIGRATION	GOBP_NEGATIVE_REGULATION_OF_NEURON_MIGRATION	1/201	11/17872	0.117016732226713	0.267890185903518	0.192373106661841	STAT3	1
GOBP_NEGATIVE_REGULATION_OF_PRODUCTION_OF_MIRNAS_INVOLVED_IN_GENE_SILENCING_BY_MIRNA	GOBP_NEGATIVE_REGULATION_OF_PRODUCTION_OF_MIRNAS_INVOLVED_IN_GENE_SILENCING_BY_MIRNA	GOBP_NEGATIVE_REGULATION_OF_PRODUCTION_OF_MIRNAS_INVOLVED_IN_GENE_SILENCING_BY_MIRNA	1/201	11/17872	0.117016732226713	0.267890185903518	0.192373106661841	TNF	1
GOBP_NEGATIVE_REGULATION_OF_T_CELL_CYTOKINE_PRODUCTION	GOBP_NEGATIVE_REGULATION_OF_T_CELL_CYTOKINE_PRODUCTION	GOBP_NEGATIVE_REGULATION_OF_T_CELL_CYTOKINE_PRODUCTION	1/201	11/17872	0.117016732226713	0.267890185903518	0.192373106661841	SLAMF1	1
GOBP_POSITIVE_REGULATION_OF_GLIAL_CELL_MIGRATION	GOBP_POSITIVE_REGULATION_OF_GLIAL_CELL_MIGRATION	GOBP_POSITIVE_REGULATION_OF_GLIAL_CELL_MIGRATION	1/201	11/17872	0.117016732226713	0.267890185903518	0.192373106661841	CCL3	1
GOBP_POSITIVE_REGULATION_OF_INTEGRIN_ACTIVATION	GOBP_POSITIVE_REGULATION_OF_INTEGRIN_ACTIVATION	GOBP_POSITIVE_REGULATION_OF_INTEGRIN_ACTIVATION	1/201	11/17872	0.117016732226713	0.267890185903518	0.192373106661841	PLEK	1
GOBP_POSITIVE_REGULATION_OF_METALLOPEPTIDASE_ACTIVITY	GOBP_POSITIVE_REGULATION_OF_METALLOPEPTIDASE_ACTIVITY	GOBP_POSITIVE_REGULATION_OF_METALLOPEPTIDASE_ACTIVITY	1/201	11/17872	0.117016732226713	0.267890185903518	0.192373106661841	STAT3	1
GOBP_POSITIVE_REGULATION_OF_TOLL_LIKE_RECEPTOR_4_SIGNALING_PATHWAY	GOBP_POSITIVE_REGULATION_OF_TOLL_LIKE_RECEPTOR_4_SIGNALING_PATHWAY	GOBP_POSITIVE_REGULATION_OF_TOLL_LIKE_RECEPTOR_4_SIGNALING_PATHWAY	1/201	11/17872	0.117016732226713	0.267890185903518	0.192373106661841	PELI1	1
GOBP_POSITIVE_REGULATION_OF_TRANSCRIPTION_FROM_RNA_POLYMERASE_II_PROMOTER_IN_RESPONSE_TO_ENDOPLASMIC_RETICULUM_STRESS	GOBP_POSITIVE_REGULATION_OF_TRANSCRIPTION_FROM_RNA_POLYMERASE_II_PROMOTER_IN_RESPONSE_TO_ENDOPLASMIC_RETICULUM_STRESS	GOBP_POSITIVE_REGULATION_OF_TRANSCRIPTION_FROM_RNA_POLYMERASE_II_PROMOTER_IN_RESPONSE_TO_ENDOPLASMIC_RETICULUM_STRESS	1/201	11/17872	0.117016732226713	0.267890185903518	0.192373106661841	ATF6	1
GOBP_POSITIVE_REGULATION_OF_UBIQUITIN_PROTEIN_LIGASE_ACTIVITY	GOBP_POSITIVE_REGULATION_OF_UBIQUITIN_PROTEIN_LIGASE_ACTIVITY	GOBP_POSITIVE_REGULATION_OF_UBIQUITIN_PROTEIN_LIGASE_ACTIVITY	1/201	11/17872	0.117016732226713	0.267890185903518	0.192373106661841	PTEN	1
GOBP_REGULATION_OF_CELLULAR_RESPONSE_TO_OSMOTIC_STRESS	GOBP_REGULATION_OF_CELLULAR_RESPONSE_TO_OSMOTIC_STRESS	GOBP_REGULATION_OF_CELLULAR_RESPONSE_TO_OSMOTIC_STRESS	1/201	11/17872	0.117016732226713	0.267890185903518	0.192373106661841	PTGS2	1
GOBP_REGULATION_OF_COMPLEMENT_DEPENDENT_CYTOTOXICITY	GOBP_REGULATION_OF_COMPLEMENT_DEPENDENT_CYTOTOXICITY	GOBP_REGULATION_OF_COMPLEMENT_DEPENDENT_CYTOTOXICITY	1/201	11/17872	0.117016732226713	0.267890185903518	0.192373106661841	CD55	1
GOBP_REGULATION_OF_DENDRITIC_CELL_ANTIGEN_PROCESSING_AND_PRESENTATION	GOBP_REGULATION_OF_DENDRITIC_CELL_ANTIGEN_PROCESSING_AND_PRESENTATION	GOBP_REGULATION_OF_DENDRITIC_CELL_ANTIGEN_PROCESSING_AND_PRESENTATION	1/201	11/17872	0.117016732226713	0.267890185903518	0.192373106661841	THBS1	1
GOBP_REGULATION_OF_DENDRITIC_CELL_CHEMOTAXIS	GOBP_REGULATION_OF_DENDRITIC_CELL_CHEMOTAXIS	GOBP_REGULATION_OF_DENDRITIC_CELL_CHEMOTAXIS	1/201	11/17872	0.117016732226713	0.267890185903518	0.192373106661841	SLAMF1	1
GOBP_REGULATION_OF_GLIAL_CELL_APOPTOTIC_PROCESS	GOBP_REGULATION_OF_GLIAL_CELL_APOPTOTIC_PROCESS	GOBP_REGULATION_OF_GLIAL_CELL_APOPTOTIC_PROCESS	1/201	11/17872	0.117016732226713	0.267890185903518	0.192373106661841	PRKCH	1
GOBP_REGULATION_OF_LAMELLIPODIUM_MORPHOGENESIS	GOBP_REGULATION_OF_LAMELLIPODIUM_MORPHOGENESIS	GOBP_REGULATION_OF_LAMELLIPODIUM_MORPHOGENESIS	1/201	11/17872	0.117016732226713	0.267890185903518	0.192373106661841	CD44	1
GOBP_REGULATION_OF_RECEPTOR_CATABOLIC_PROCESS	GOBP_REGULATION_OF_RECEPTOR_CATABOLIC_PROCESS	GOBP_REGULATION_OF_RECEPTOR_CATABOLIC_PROCESS	1/201	11/17872	0.117016732226713	0.267890185903518	0.192373106661841	PTPN1	1
GOBP_REGULATION_OF_SULFUR_METABOLIC_PROCESS	GOBP_REGULATION_OF_SULFUR_METABOLIC_PROCESS	GOBP_REGULATION_OF_SULFUR_METABOLIC_PROCESS	1/201	11/17872	0.117016732226713	0.267890185903518	0.192373106661841	NFE2L2	1
GOBP_REGULATION_OF_TRANSCRIPTION_FROM_RNA_POLYMERASE_II_PROMOTER_IN_RESPONSE_TO_OXIDATIVE_STRESS	GOBP_REGULATION_OF_TRANSCRIPTION_FROM_RNA_POLYMERASE_II_PROMOTER_IN_RESPONSE_TO_OXIDATIVE_STRESS	GOBP_REGULATION_OF_TRANSCRIPTION_FROM_RNA_POLYMERASE_II_PROMOTER_IN_RESPONSE_TO_OXIDATIVE_STRESS	1/201	11/17872	0.117016732226713	0.267890185903518	0.192373106661841	NFE2L2	1
GOBP_REGULATION_OF_TRANSLATION_IN_RESPONSE_TO_ENDOPLASMIC_RETICULUM_STRESS	GOBP_REGULATION_OF_TRANSLATION_IN_RESPONSE_TO_ENDOPLASMIC_RETICULUM_STRESS	GOBP_REGULATION_OF_TRANSLATION_IN_RESPONSE_TO_ENDOPLASMIC_RETICULUM_STRESS	1/201	11/17872	0.117016732226713	0.267890185903518	0.192373106661841	PPP1R15A	1
GOBP_RELAXATION_OF_SMOOTH_MUSCLE	GOBP_RELAXATION_OF_SMOOTH_MUSCLE	GOBP_RELAXATION_OF_SMOOTH_MUSCLE	1/201	11/17872	0.117016732226713	0.267890185903518	0.192373106661841	KCNMA1	1
GOBP_RESPONSE_TO_MERCURY_ION	GOBP_RESPONSE_TO_MERCURY_ION	GOBP_RESPONSE_TO_MERCURY_ION	1/201	11/17872	0.117016732226713	0.267890185903518	0.192373106661841	AQP9	1
GOBP_RETINA_VASCULATURE_MORPHOGENESIS_IN_CAMERA_TYPE_EYE	GOBP_RETINA_VASCULATURE_MORPHOGENESIS_IN_CAMERA_TYPE_EYE	GOBP_RETINA_VASCULATURE_MORPHOGENESIS_IN_CAMERA_TYPE_EYE	1/201	11/17872	0.117016732226713	0.267890185903518	0.192373106661841	CLIC4	1
GOBP_VASCULAR_ASSOCIATED_SMOOTH_MUSCLE_CELL_DEVELOPMENT	GOBP_VASCULAR_ASSOCIATED_SMOOTH_MUSCLE_CELL_DEVELOPMENT	GOBP_VASCULAR_ASSOCIATED_SMOOTH_MUSCLE_CELL_DEVELOPMENT	1/201	11/17872	0.117016732226713	0.267890185903518	0.192373106661841	ADM	1
GOBP_REGULATION_OF_ACTIN_FILAMENT_BUNDLE_ASSEMBLY	GOBP_REGULATION_OF_ACTIN_FILAMENT_BUNDLE_ASSEMBLY	GOBP_REGULATION_OF_ACTIN_FILAMENT_BUNDLE_ASSEMBLY	3/201	106/17872	0.117296094469974	0.268323811199334	0.192684494871163	SDC4/PLEK/MTSS1	3
GOBP_SKELETAL_MUSCLE_ORGAN_DEVELOPMENT	GOBP_SKELETAL_MUSCLE_ORGAN_DEVELOPMENT	GOBP_SKELETAL_MUSCLE_ORGAN_DEVELOPMENT	4/201	166/17872	0.117724886973913	0.269098343174852	0.193240689648649	CFLAR/BTG2/MAFF/EGR1	4
GOBP_NEGATIVE_REGULATION_OF_SECRETION	GOBP_NEGATIVE_REGULATION_OF_SECRETION	GOBP_NEGATIVE_REGULATION_OF_SECRETION	4/201	167/17872	0.11961752457741	0.271907690650052	0.19525809427911	IL1B/TNF/IL1RAPL1/KLF7	4
GOBP_PLASMA_LIPOPROTEIN_PARTICLE_CLEARANCE	GOBP_PLASMA_LIPOPROTEIN_PARTICLE_CLEARANCE	GOBP_PLASMA_LIPOPROTEIN_PARTICLE_CLEARANCE	2/201	53/17872	0.119648502549581	0.271907690650052	0.19525809427911	EHD1/LDLR	2
GOBP_REGULATION_OF_ALCOHOL_BIOSYNTHETIC_PROCESS	GOBP_REGULATION_OF_ALCOHOL_BIOSYNTHETIC_PROCESS	GOBP_REGULATION_OF_ALCOHOL_BIOSYNTHETIC_PROCESS	2/201	53/17872	0.119648502549581	0.271907690650052	0.19525809427911	NFKB1/PLEK	2
GOBP_RESPONSE_TO_ZINC_ION	GOBP_RESPONSE_TO_ZINC_ION	GOBP_RESPONSE_TO_ZINC_ION	2/201	53/17872	0.119648502549581	0.271907690650052	0.19525809427911	SOD2/MT2A	2
GOBP_STRIATED_MUSCLE_CELL_APOPTOTIC_PROCESS	GOBP_STRIATED_MUSCLE_CELL_APOPTOTIC_PROCESS	GOBP_STRIATED_MUSCLE_CELL_APOPTOTIC_PROCESS	2/201	53/17872	0.119648502549581	0.271907690650052	0.19525809427911	CFLAR/NFE2L2	2
GOBP_ANTIGEN_PROCESSING_AND_PRESENTATION	GOBP_ANTIGEN_PROCESSING_AND_PRESENTATION	GOBP_ANTIGEN_PROCESSING_AND_PRESENTATION	3/201	107/17872	0.119735953804661	0.271907690650052	0.19525809427911	THBS1/ICAM1/HLA-DQA2	3
GOBP_MYELOID_LEUKOCYTE_MEDIATED_IMMUNITY	GOBP_MYELOID_LEUKOCYTE_MEDIATED_IMMUNITY	GOBP_MYELOID_LEUKOCYTE_MEDIATED_IMMUNITY	3/201	107/17872	0.119735953804661	0.271907690650052	0.19525809427911	SERPINB9/ADGRE2/CCL3	3
GOBP_POSITIVE_REGULATION_OF_PEPTIDYL_SERINE_PHOSPHORYLATION	GOBP_POSITIVE_REGULATION_OF_PEPTIDYL_SERINE_PHOSPHORYLATION	GOBP_POSITIVE_REGULATION_OF_PEPTIDYL_SERINE_PHOSPHORYLATION	3/201	107/17872	0.119735953804661	0.271907690650052	0.19525809427911	CD44/TNF/PTGS2	3
GOBP_DEVELOPMENT_OF_PRIMARY_SEXUAL_CHARACTERISTICS	GOBP_DEVELOPMENT_OF_PRIMARY_SEXUAL_CHARACTERISTICS	GOBP_DEVELOPMENT_OF_PRIMARY_SEXUAL_CHARACTERISTICS	5/201	231/17872	0.119865441905739	0.271907690650052	0.19525809427911	IL1A/EREG/INSR/CSMD1/TNFAIP6	5
GOBP_REGULATION_OF_ENDOTHELIAL_CELL_MIGRATION	GOBP_REGULATION_OF_ENDOTHELIAL_CELL_MIGRATION	GOBP_REGULATION_OF_ENDOTHELIAL_CELL_MIGRATION	5/201	231/17872	0.119865441905739	0.271907690650052	0.19525809427911	THBS1/RIN2/TNF/NFE2L2/PTGS2	5
GOBP_CELLULAR_RESPONSE_TO_XENOBIOTIC_STIMULUS	GOBP_CELLULAR_RESPONSE_TO_XENOBIOTIC_STIMULUS	GOBP_CELLULAR_RESPONSE_TO_XENOBIOTIC_STIMULUS	4/201	168/17872	0.121523339374133	0.275459058778905	0.197808347165542	IL1B/ACSL1/PDE4B/NFE2L2	4
GOBP_RESPONSE_TO_HEAT	GOBP_RESPONSE_TO_HEAT	GOBP_RESPONSE_TO_HEAT	3/201	108/17872	0.122194575200811	0.276390203281643	0.198477006079413	IL1A/THBS1/PTGS2	3
GOBP_TISSUE_MIGRATION	GOBP_TISSUE_MIGRATION	GOBP_TISSUE_MIGRATION	7/201	368/17872	0.122280896091454	0.276390203281643	0.198477006079413	THBS1/PTEN/RIN2/TNF/PRKCE/NFE2L2/PTGS2	7
GOBP_REGULATION_OF_SMALL_GTPASE_MEDIATED_SIGNAL_TRANSDUCTION	GOBP_REGULATION_OF_SMALL_GTPASE_MEDIATED_SIGNAL_TRANSDUCTION	GOBP_REGULATION_OF_SMALL_GTPASE_MEDIATED_SIGNAL_TRANSDUCTION	6/201	300/17872	0.123307010172627	0.276390203281643	0.198477006079413	SIPA1L1/BCL6/DENND4A/AKAP13/FGD4/ABL2	6
GOBP_CELLULAR_RESPONSE_TO_CAMP	GOBP_CELLULAR_RESPONSE_TO_CAMP	GOBP_CELLULAR_RESPONSE_TO_CAMP	2/201	54/17872	0.123371718015596	0.276390203281643	0.198477006079413	AQP9/RAPGEF2	2
GOBP_ICOSANOID_TRANSPORT	GOBP_ICOSANOID_TRANSPORT	GOBP_ICOSANOID_TRANSPORT	2/201	54/17872	0.123371718015596	0.276390203281643	0.198477006079413	IL1B/IL1A	2
GOBP_NEGATIVE_REGULATION_OF_OXIDATIVE_STRESS_INDUCED_CELL_DEATH	GOBP_NEGATIVE_REGULATION_OF_OXIDATIVE_STRESS_INDUCED_CELL_DEATH	GOBP_NEGATIVE_REGULATION_OF_OXIDATIVE_STRESS_INDUCED_CELL_DEATH	2/201	54/17872	0.123371718015596	0.276390203281643	0.198477006079413	SOD2/NFE2L2	2
GOBP_POLYSACCHARIDE_METABOLIC_PROCESS	GOBP_POLYSACCHARIDE_METABOLIC_PROCESS	GOBP_POLYSACCHARIDE_METABOLIC_PROCESS	3/201	109/17872	0.124671664486771	0.276390203281643	0.198477006079413	NFKB1/INSR/CSGALNACT2	3
GOBP_RESPONSE_TO_RETINOIC_ACID	GOBP_RESPONSE_TO_RETINOIC_ACID	GOBP_RESPONSE_TO_RETINOIC_ACID	3/201	109/17872	0.124671664486771	0.276390203281643	0.198477006079413	ALDH1A2/TNF/ABL2	3
GOBP_REGULATION_OF_HORMONE_SECRETION	GOBP_REGULATION_OF_HORMONE_SECRETION	GOBP_REGULATION_OF_HORMONE_SECRETION	5/201	234/17872	0.124672531993075	0.276390203281643	0.198477006079413	IL1B/ENSA/TNF/PRKCE/KLF7	5
GOBP_NEGATIVE_REGULATION_OF_CELL_CYCLE_PROCESS	GOBP_NEGATIVE_REGULATION_OF_CELL_CYCLE_PROCESS	GOBP_NEGATIVE_REGULATION_OF_CELL_CYCLE_PROCESS	6/201	301/17872	0.124712654547264	0.276390203281643	0.198477006079413	GPR132/PTEN/BCL6/DUSP1/PLK3/TEX14	6
GOBP_ADHESION_OF_SYMBIONT_TO_HOST_CELL	GOBP_ADHESION_OF_SYMBIONT_TO_HOST_CELL	GOBP_ADHESION_OF_SYMBIONT_TO_HOST_CELL	1/201	12/17872	0.126953445558689	0.276390203281643	0.198477006079413	ICAM1	1
GOBP_BILE_ACID_SECRETION	GOBP_BILE_ACID_SECRETION	GOBP_BILE_ACID_SECRETION	1/201	12/17872	0.126953445558689	0.276390203281643	0.198477006079413	TNF	1
GOBP_CD4_POSITIVE_ALPHA_BETA_T_CELL_PROLIFERATION	GOBP_CD4_POSITIVE_ALPHA_BETA_T_CELL_PROLIFERATION	GOBP_CD4_POSITIVE_ALPHA_BETA_T_CELL_PROLIFERATION	1/201	12/17872	0.126953445558689	0.276390203281643	0.198477006079413	CD55	1
GOBP_CELL_CELL_ADHESION_INVOLVED_IN_GASTRULATION	GOBP_CELL_CELL_ADHESION_INVOLVED_IN_GASTRULATION	GOBP_CELL_CELL_ADHESION_INVOLVED_IN_GASTRULATION	1/201	12/17872	0.126953445558689	0.276390203281643	0.198477006079413	IL1RN	1
GOBP_CELLULAR_RESPONSE_TO_COLD	GOBP_CELLULAR_RESPONSE_TO_COLD	GOBP_CELLULAR_RESPONSE_TO_COLD	1/201	12/17872	0.126953445558689	0.276390203281643	0.198477006079413	NFKBIA	1
GOBP_CELLULAR_RESPONSE_TO_OXIDISED_LOW_DENSITY_LIPOPROTEIN_PARTICLE_STIMULUS	GOBP_CELLULAR_RESPONSE_TO_OXIDISED_LOW_DENSITY_LIPOPROTEIN_PARTICLE_STIMULUS	GOBP_CELLULAR_RESPONSE_TO_OXIDISED_LOW_DENSITY_LIPOPROTEIN_PARTICLE_STIMULUS	1/201	12/17872	0.126953445558689	0.276390203281643	0.198477006079413	TLR4	1
GOBP_CYTIDINE_TO_URIDINE_EDITING	GOBP_CYTIDINE_TO_URIDINE_EDITING	GOBP_CYTIDINE_TO_URIDINE_EDITING	1/201	12/17872	0.126953445558689	0.276390203281643	0.198477006079413	RBM47	1
GOBP_DETECTION_OF_MOLECULE_OF_BACTERIAL_ORIGIN	GOBP_DETECTION_OF_MOLECULE_OF_BACTERIAL_ORIGIN	GOBP_DETECTION_OF_MOLECULE_OF_BACTERIAL_ORIGIN	1/201	12/17872	0.126953445558689	0.276390203281643	0.198477006079413	TLR4	1
GOBP_DOPAMINE_BIOSYNTHETIC_PROCESS	GOBP_DOPAMINE_BIOSYNTHETIC_PROCESS	GOBP_DOPAMINE_BIOSYNTHETIC_PROCESS	1/201	12/17872	0.126953445558689	0.276390203281643	0.198477006079413	GCH1	1
GOBP_FOREBRAIN_MORPHOGENESIS	GOBP_FOREBRAIN_MORPHOGENESIS	GOBP_FOREBRAIN_MORPHOGENESIS	1/201	12/17872	0.126953445558689	0.276390203281643	0.198477006079413	PTEN	1
GOBP_NEGATIVE_REGULATION_OF_ACUTE_INFLAMMATORY_RESPONSE	GOBP_NEGATIVE_REGULATION_OF_ACUTE_INFLAMMATORY_RESPONSE	GOBP_NEGATIVE_REGULATION_OF_ACUTE_INFLAMMATORY_RESPONSE	1/201	12/17872	0.126953445558689	0.276390203281643	0.198477006079413	NLRP3	1
GOBP_NEGATIVE_REGULATION_OF_ADENYLATE_CYCLASE_ACTIVATING_G_PROTEIN_COUPLED_RECEPTOR_SIGNALING_PATHWAY	GOBP_NEGATIVE_REGULATION_OF_ADENYLATE_CYCLASE_ACTIVATING_G_PROTEIN_COUPLED_RECEPTOR_SIGNALING_PATHWAY	GOBP_NEGATIVE_REGULATION_OF_ADENYLATE_CYCLASE_ACTIVATING_G_PROTEIN_COUPLED_RECEPTOR_SIGNALING_PATHWAY	1/201	12/17872	0.126953445558689	0.276390203281643	0.198477006079413	PDE4B	1
GOBP_NEGATIVE_REGULATION_OF_COMPLEMENT_ACTIVATION	GOBP_NEGATIVE_REGULATION_OF_COMPLEMENT_ACTIVATION	GOBP_NEGATIVE_REGULATION_OF_COMPLEMENT_ACTIVATION	1/201	12/17872	0.126953445558689	0.276390203281643	0.198477006079413	CD55	1
GOBP_NEGATIVE_REGULATION_OF_HEART_RATE	GOBP_NEGATIVE_REGULATION_OF_HEART_RATE	GOBP_NEGATIVE_REGULATION_OF_HEART_RATE	1/201	12/17872	0.126953445558689	0.276390203281643	0.198477006079413	TNF	1
GOBP_NEGATIVE_REGULATION_OF_IMMUNOGLOBULIN_PRODUCTION	GOBP_NEGATIVE_REGULATION_OF_IMMUNOGLOBULIN_PRODUCTION	GOBP_NEGATIVE_REGULATION_OF_IMMUNOGLOBULIN_PRODUCTION	1/201	12/17872	0.126953445558689	0.276390203281643	0.198477006079413	BCL6	1
GOBP_NEGATIVE_REGULATION_OF_PATHWAY_RESTRICTED_SMAD_PROTEIN_PHOSPHORYLATION	GOBP_NEGATIVE_REGULATION_OF_PATHWAY_RESTRICTED_SMAD_PROTEIN_PHOSPHORYLATION	GOBP_NEGATIVE_REGULATION_OF_PATHWAY_RESTRICTED_SMAD_PROTEIN_PHOSPHORYLATION	1/201	12/17872	0.126953445558689	0.276390203281643	0.198477006079413	LDLRAD4	1
GOBP_NEGATIVE_REGULATION_OF_VASCULAR_ENDOTHELIAL_GROWTH_FACTOR_RECEPTOR_SIGNALING_PATHWAY	GOBP_NEGATIVE_REGULATION_OF_VASCULAR_ENDOTHELIAL_GROWTH_FACTOR_RECEPTOR_SIGNALING_PATHWAY	GOBP_NEGATIVE_REGULATION_OF_VASCULAR_ENDOTHELIAL_GROWTH_FACTOR_RECEPTOR_SIGNALING_PATHWAY	1/201	12/17872	0.126953445558689	0.276390203281643	0.198477006079413	PTPN1	1
GOBP_NERVE_GROWTH_FACTOR_SIGNALING_PATHWAY	GOBP_NERVE_GROWTH_FACTOR_SIGNALING_PATHWAY	GOBP_NERVE_GROWTH_FACTOR_SIGNALING_PATHWAY	1/201	12/17872	0.126953445558689	0.276390203281643	0.198477006079413	RAPGEF2	1
GOBP_PARENTAL_BEHAVIOR	GOBP_PARENTAL_BEHAVIOR	GOBP_PARENTAL_BEHAVIOR	1/201	12/17872	0.126953445558689	0.276390203281643	0.198477006079413	PTEN	1
GOBP_POSITIVE_REGULATION_OF_HAIR_FOLLICLE_DEVELOPMENT	GOBP_POSITIVE_REGULATION_OF_HAIR_FOLLICLE_DEVELOPMENT	GOBP_POSITIVE_REGULATION_OF_HAIR_FOLLICLE_DEVELOPMENT	1/201	12/17872	0.126953445558689	0.276390203281643	0.198477006079413	TNF	1
GOBP_POSITIVE_REGULATION_OF_INFLAMMATORY_RESPONSE_TO_ANTIGENIC_STIMULUS	GOBP_POSITIVE_REGULATION_OF_INFLAMMATORY_RESPONSE_TO_ANTIGENIC_STIMULUS	GOBP_POSITIVE_REGULATION_OF_INFLAMMATORY_RESPONSE_TO_ANTIGENIC_STIMULUS	1/201	12/17872	0.126953445558689	0.276390203281643	0.198477006079413	TNF	1
GOBP_POSITIVE_REGULATION_OF_MACROPHAGE_CYTOKINE_PRODUCTION	GOBP_POSITIVE_REGULATION_OF_MACROPHAGE_CYTOKINE_PRODUCTION	GOBP_POSITIVE_REGULATION_OF_MACROPHAGE_CYTOKINE_PRODUCTION	1/201	12/17872	0.126953445558689	0.276390203281643	0.198477006079413	TLR4	1
GOBP_POSITIVE_REGULATION_OF_NLRP3_INFLAMMASOME_COMPLEX_ASSEMBLY	GOBP_POSITIVE_REGULATION_OF_NLRP3_INFLAMMASOME_COMPLEX_ASSEMBLY	GOBP_POSITIVE_REGULATION_OF_NLRP3_INFLAMMASOME_COMPLEX_ASSEMBLY	1/201	12/17872	0.126953445558689	0.276390203281643	0.198477006079413	TLR4	1
GOBP_POSITIVE_REGULATION_OF_PODOSOME_ASSEMBLY	GOBP_POSITIVE_REGULATION_OF_PODOSOME_ASSEMBLY	GOBP_POSITIVE_REGULATION_OF_PODOSOME_ASSEMBLY	1/201	12/17872	0.126953445558689	0.276390203281643	0.198477006079413	TNF	1
GOBP_POSITIVE_REGULATION_OF_RECEPTOR_RECYCLING	GOBP_POSITIVE_REGULATION_OF_RECEPTOR_RECYCLING	GOBP_POSITIVE_REGULATION_OF_RECEPTOR_RECYCLING	1/201	12/17872	0.126953445558689	0.276390203281643	0.198477006079413	ECE1	1
GOBP_POSITIVE_REGULATION_OF_TOLERANCE_INDUCTION	GOBP_POSITIVE_REGULATION_OF_TOLERANCE_INDUCTION	GOBP_POSITIVE_REGULATION_OF_TOLERANCE_INDUCTION	1/201	12/17872	0.126953445558689	0.276390203281643	0.198477006079413	IRAK3	1
GOBP_PREPULSE_INHIBITION	GOBP_PREPULSE_INHIBITION	GOBP_PREPULSE_INHIBITION	1/201	12/17872	0.126953445558689	0.276390203281643	0.198477006079413	PTEN	1
GOBP_PROSTATE_GLAND_GROWTH	GOBP_PROSTATE_GLAND_GROWTH	GOBP_PROSTATE_GLAND_GROWTH	1/201	12/17872	0.126953445558689	0.276390203281643	0.198477006079413	PTEN	1
GOBP_RADIAL_GLIAL_CELL_DIFFERENTIATION	GOBP_RADIAL_GLIAL_CELL_DIFFERENTIATION	GOBP_RADIAL_GLIAL_CELL_DIFFERENTIATION	1/201	12/17872	0.126953445558689	0.276390203281643	0.198477006079413	STAT3	1
GOBP_REGULATION_OF_INTERLEUKIN_6_MEDIATED_SIGNALING_PATHWAY	GOBP_REGULATION_OF_INTERLEUKIN_6_MEDIATED_SIGNALING_PATHWAY	GOBP_REGULATION_OF_INTERLEUKIN_6_MEDIATED_SIGNALING_PATHWAY	1/201	12/17872	0.126953445558689	0.276390203281643	0.198477006079413	PTPN2	1
GOBP_REGULATION_OF_MIRNA_METABOLIC_PROCESS	GOBP_REGULATION_OF_MIRNA_METABOLIC_PROCESS	GOBP_REGULATION_OF_MIRNA_METABOLIC_PROCESS	1/201	12/17872	0.126953445558689	0.276390203281643	0.198477006079413	NFKB1	1
GOBP_REGULATION_OF_PROTEIN_CATABOLIC_PROCESS_IN_THE_VACUOLE	GOBP_REGULATION_OF_PROTEIN_CATABOLIC_PROCESS_IN_THE_VACUOLE	GOBP_REGULATION_OF_PROTEIN_CATABOLIC_PROCESS_IN_THE_VACUOLE	1/201	12/17872	0.126953445558689	0.276390203281643	0.198477006079413	LDLR	1
GOBP_REGULATION_OF_PROTEIN_DEUBIQUITINATION	GOBP_REGULATION_OF_PROTEIN_DEUBIQUITINATION	GOBP_REGULATION_OF_PROTEIN_DEUBIQUITINATION	1/201	12/17872	0.126953445558689	0.276390203281643	0.198477006079413	TNIP1	1
GOBP_REGULATION_OF_RECEPTOR_CLUSTERING	GOBP_REGULATION_OF_RECEPTOR_CLUSTERING	GOBP_REGULATION_OF_RECEPTOR_CLUSTERING	1/201	12/17872	0.126953445558689	0.276390203281643	0.198477006079413	TNFAIP6	1
GOBP_REGULATION_OF_TOLL_LIKE_RECEPTOR_2_SIGNALING_PATHWAY	GOBP_REGULATION_OF_TOLL_LIKE_RECEPTOR_2_SIGNALING_PATHWAY	GOBP_REGULATION_OF_TOLL_LIKE_RECEPTOR_2_SIGNALING_PATHWAY	1/201	12/17872	0.126953445558689	0.276390203281643	0.198477006079413	TNFAIP3	1
GOBP_REGULATION_OF_TRANSFORMING_GROWTH_FACTOR_BETA1_PRODUCTION	GOBP_REGULATION_OF_TRANSFORMING_GROWTH_FACTOR_BETA1_PRODUCTION	GOBP_REGULATION_OF_TRANSFORMING_GROWTH_FACTOR_BETA1_PRODUCTION	1/201	12/17872	0.126953445558689	0.276390203281643	0.198477006079413	THBS1	1
GOBP_REGULATION_OF_VENTRICULAR_CARDIAC_MUSCLE_CELL_ACTION_POTENTIAL	GOBP_REGULATION_OF_VENTRICULAR_CARDIAC_MUSCLE_CELL_ACTION_POTENTIAL	GOBP_REGULATION_OF_VENTRICULAR_CARDIAC_MUSCLE_CELL_ACTION_POTENTIAL	1/201	12/17872	0.126953445558689	0.276390203281643	0.198477006079413	PKP2	1
GOBP_RESPONSE_TO_SELENIUM_ION	GOBP_RESPONSE_TO_SELENIUM_ION	GOBP_RESPONSE_TO_SELENIUM_ION	1/201	12/17872	0.126953445558689	0.276390203281643	0.198477006079413	SOD2	1
GOBP_REVERSIBLE_DIFFERENTIATION	GOBP_REVERSIBLE_DIFFERENTIATION	GOBP_REVERSIBLE_DIFFERENTIATION	1/201	12/17872	0.126953445558689	0.276390203281643	0.198477006079413	SOD2	1
GOBP_THROMBIN_ACTIVATED_RECEPTOR_SIGNALING_PATHWAY	GOBP_THROMBIN_ACTIVATED_RECEPTOR_SIGNALING_PATHWAY	GOBP_THROMBIN_ACTIVATED_RECEPTOR_SIGNALING_PATHWAY	1/201	12/17872	0.126953445558689	0.276390203281643	0.198477006079413	PLEK	1
GOBP_TOLL_LIKE_RECEPTOR_7_SIGNALING_PATHWAY	GOBP_TOLL_LIKE_RECEPTOR_7_SIGNALING_PATHWAY	GOBP_TOLL_LIKE_RECEPTOR_7_SIGNALING_PATHWAY	1/201	12/17872	0.126953445558689	0.276390203281643	0.198477006079413	PIK3AP1	1
GOBP_ALCOHOL_CATABOLIC_PROCESS	GOBP_ALCOHOL_CATABOLIC_PROCESS	GOBP_ALCOHOL_CATABOLIC_PROCESS	2/201	55/17872	0.127122815589143	0.276390203281643	0.198477006079413	PTEN/GK	2
GOBP_INOSITOL_PHOSPHATE_METABOLIC_PROCESS	GOBP_INOSITOL_PHOSPHATE_METABOLIC_PROCESS	GOBP_INOSITOL_PHOSPHATE_METABOLIC_PROCESS	2/201	55/17872	0.127122815589143	0.276390203281643	0.198477006079413	PTEN/PLEK	2
GOBP_NEGATIVE_REGULATION_OF_NUCLEAR_DIVISION	GOBP_NEGATIVE_REGULATION_OF_NUCLEAR_DIVISION	GOBP_NEGATIVE_REGULATION_OF_NUCLEAR_DIVISION	2/201	55/17872	0.127122815589143	0.276390203281643	0.198477006079413	DUSP1/TEX14	2
GOBP_REGULATION_OF_AMYLOID_PRECURSOR_PROTEIN_CATABOLIC_PROCESS	GOBP_REGULATION_OF_AMYLOID_PRECURSOR_PROTEIN_CATABOLIC_PROCESS	GOBP_REGULATION_OF_AMYLOID_PRECURSOR_PROTEIN_CATABOLIC_PROCESS	2/201	55/17872	0.127122815589143	0.276390203281643	0.198477006079413	TNF/GSAP	2
GOBP_REGULATION_OF_CARBOHYDRATE_CATABOLIC_PROCESS	GOBP_REGULATION_OF_CARBOHYDRATE_CATABOLIC_PROCESS	GOBP_REGULATION_OF_CARBOHYDRATE_CATABOLIC_PROCESS	2/201	55/17872	0.127122815589143	0.276390203281643	0.198477006079413	INSR/STAT3	2
GOBP_TRANSMEMBRANE_RECEPTOR_PROTEIN_SERINE_THREONINE_KINASE_SIGNALING_PATHWAY	GOBP_TRANSMEMBRANE_RECEPTOR_PROTEIN_SERINE_THREONINE_KINASE_SIGNALING_PATHWAY	GOBP_TRANSMEMBRANE_RECEPTOR_PROTEIN_SERINE_THREONINE_KINASE_SIGNALING_PATHWAY	7/201	373/17872	0.128605299411133	0.279409765581508	0.200645366888992	THBS1/HIPK2/TNFAIP6/CHST11/STAT3/LDLRAD4/EGR1	7
GOBP_REGULATION_OF_MRNA_CATABOLIC_PROCESS	GOBP_REGULATION_OF_MRNA_CATABOLIC_PROCESS	GOBP_REGULATION_OF_MRNA_CATABOLIC_PROCESS	4/201	172/17872	0.129275984925045	0.280458373113752	0.201398376514807	HNRNPC/ZFP36/SCGB1A1/BTG2	4
GOBP_REGULATION_OF_PROTEIN_LOCALIZATION_TO_MEMBRANE	GOBP_REGULATION_OF_PROTEIN_LOCALIZATION_TO_MEMBRANE	GOBP_REGULATION_OF_PROTEIN_LOCALIZATION_TO_MEMBRANE	4/201	172/17872	0.129275984925045	0.280458373113752	0.201398376514807	TNF/PRKCE/TNFAIP6/PRKCH	4
GOBP_ANTIGEN_RECEPTOR_MEDIATED_SIGNALING_PATHWAY	GOBP_ANTIGEN_RECEPTOR_MEDIATED_SIGNALING_PATHWAY	GOBP_ANTIGEN_RECEPTOR_MEDIATED_SIGNALING_PATHWAY	5/201	237/17872	0.129567922241098	0.280722525382365	0.201588065406818	NFKBIZ/LCP2/PDE4B/PTPN2/PRKCH	5
GOBP_LONG_CHAIN_FATTY_ACID_METABOLIC_PROCESS	GOBP_LONG_CHAIN_FATTY_ACID_METABOLIC_PROCESS	GOBP_LONG_CHAIN_FATTY_ACID_METABOLIC_PROCESS	3/201	111/17872	0.129680067038853	0.280722525382365	0.201588065406818	ACSL1/TBXAS1/PTGS2	3
GOBP_VITAMIN_METABOLIC_PROCESS	GOBP_VITAMIN_METABOLIC_PROCESS	GOBP_VITAMIN_METABOLIC_PROCESS	3/201	111/17872	0.129680067038853	0.280722525382365	0.201588065406818	ALDH1A2/NFKB1/TNF	3
GOBP_REGULATION_OF_CELL_MORPHOGENESIS	GOBP_REGULATION_OF_CELL_MORPHOGENESIS	GOBP_REGULATION_OF_CELL_MORPHOGENESIS	6/201	305/17872	0.130413675819807	0.281323346526971	0.202019517681735	HCK/CD44/RHOH/IL1RAPL1/CCL3/FGD4	6
GOBP_AMYLOID_BETA_FORMATION	GOBP_AMYLOID_BETA_FORMATION	GOBP_AMYLOID_BETA_FORMATION	2/201	56/17872	0.130900705658543	0.281323346526971	0.202019517681735	TNF/GSAP	2
GOBP_DSRNA_PROCESSING	GOBP_DSRNA_PROCESSING	GOBP_DSRNA_PROCESSING	2/201	56/17872	0.130900705658543	0.281323346526971	0.202019517681735	TNF/STAT3	2
GOBP_INOSITOL_PHOSPHATE_MEDIATED_SIGNALING	GOBP_INOSITOL_PHOSPHATE_MEDIATED_SIGNALING	GOBP_INOSITOL_PHOSPHATE_MEDIATED_SIGNALING	2/201	56/17872	0.130900705658543	0.281323346526971	0.202019517681735	TNF/NFAT5	2
GOBP_LEUKOCYTE_ADHESION_TO_VASCULAR_ENDOTHELIAL_CELL	GOBP_LEUKOCYTE_ADHESION_TO_VASCULAR_ENDOTHELIAL_CELL	GOBP_LEUKOCYTE_ADHESION_TO_VASCULAR_ENDOTHELIAL_CELL	2/201	56/17872	0.130900705658543	0.281323346526971	0.202019517681735	TNF/NFAT5	2
GOBP_POSITIVE_REGULATION_OF_PHOSPHOLIPASE_ACTIVITY	GOBP_POSITIVE_REGULATION_OF_PHOSPHOLIPASE_ACTIVITY	GOBP_POSITIVE_REGULATION_OF_PHOSPHOLIPASE_ACTIVITY	2/201	56/17872	0.130900705658543	0.281323346526971	0.202019517681735	FLT1/ABL2	2
GOBP_PROTEOGLYCAN_BIOSYNTHETIC_PROCESS	GOBP_PROTEOGLYCAN_BIOSYNTHETIC_PROCESS	GOBP_PROTEOGLYCAN_BIOSYNTHETIC_PROCESS	2/201	56/17872	0.130900705658543	0.281323346526971	0.202019517681735	CHST11/CSGALNACT2	2
GOBP_RECEPTOR_CLUSTERING	GOBP_RECEPTOR_CLUSTERING	GOBP_RECEPTOR_CLUSTERING	2/201	56/17872	0.130900705658543	0.281323346526971	0.202019517681735	TNFAIP6/SAV1	2
GOBP_REGULATION_OF_BIOLOGICAL_PROCESS_INVOLVED_IN_SYMBIOTIC_INTERACTION	GOBP_REGULATION_OF_BIOLOGICAL_PROCESS_INVOLVED_IN_SYMBIOTIC_INTERACTION	GOBP_REGULATION_OF_BIOLOGICAL_PROCESS_INVOLVED_IN_SYMBIOTIC_INTERACTION	2/201	56/17872	0.130900705658543	0.281323346526971	0.202019517681735	CH25H/CXCL8	2
GOBP_RELEASE_OF_CYTOCHROME_C_FROM_MITOCHONDRIA	GOBP_RELEASE_OF_CYTOCHROME_C_FROM_MITOCHONDRIA	GOBP_RELEASE_OF_CYTOCHROME_C_FROM_MITOCHONDRIA	2/201	56/17872	0.130900705658543	0.281323346526971	0.202019517681735	SOD2/PMAIP1	2
GOBP_NEGATIVE_REGULATION_OF_EPITHELIAL_CELL_MIGRATION	GOBP_NEGATIVE_REGULATION_OF_EPITHELIAL_CELL_MIGRATION	GOBP_NEGATIVE_REGULATION_OF_EPITHELIAL_CELL_MIGRATION	3/201	112/17872	0.132210789267578	0.283934330010933	0.203894476268063	THBS1/PTEN/TNF	3
GOBP_CYTOKINESIS	GOBP_CYTOKINESIS	GOBP_CYTOKINESIS	4/201	174/17872	0.133228238304391	0.28552233412294	0.20503482892185	PLK3/PRKCE/SNX9/TEX14	4
GOBP_SIGNAL_TRANSDUCTION_IN_RESPONSE_TO_DNA_DAMAGE	GOBP_SIGNAL_TRANSDUCTION_IN_RESPONSE_TO_DNA_DAMAGE	GOBP_SIGNAL_TRANSDUCTION_IN_RESPONSE_TO_DNA_DAMAGE	4/201	174/17872	0.133228238304391	0.28552233412294	0.20503482892185	PMAIP1/CD44/HIPK2/PLK3	4
GOBP_NEURON_APOPTOTIC_PROCESS	GOBP_NEURON_APOPTOTIC_PROCESS	GOBP_NEURON_APOPTOTIC_PROCESS	5/201	240/17872	0.134549915077668	0.28552233412294	0.20503482892185	SOD2/HIPK2/TNF/CCL3/BTG2	5
GOBP_NEGATIVE_REGULATION_OF_SMALL_GTPASE_MEDIATED_SIGNAL_TRANSDUCTION	GOBP_NEGATIVE_REGULATION_OF_SMALL_GTPASE_MEDIATED_SIGNAL_TRANSDUCTION	GOBP_NEGATIVE_REGULATION_OF_SMALL_GTPASE_MEDIATED_SIGNAL_TRANSDUCTION	2/201	57/17872	0.134704319370168	0.28552233412294	0.20503482892185	BCL6/ABL2	2
GOBP_OVARIAN_FOLLICLE_DEVELOPMENT	GOBP_OVARIAN_FOLLICLE_DEVELOPMENT	GOBP_OVARIAN_FOLLICLE_DEVELOPMENT	2/201	57/17872	0.134704319370168	0.28552233412294	0.20503482892185	EREG/TNFAIP6	2
GOBP_REGULATION_OF_CELL_AGING	GOBP_REGULATION_OF_CELL_AGING	GOBP_REGULATION_OF_CELL_AGING	2/201	57/17872	0.134704319370168	0.28552233412294	0.20503482892185	PTEN/BCL6	2
GOBP_REGULATION_OF_LYMPHOCYTE_APOPTOTIC_PROCESS	GOBP_REGULATION_OF_LYMPHOCYTE_APOPTOTIC_PROCESS	GOBP_REGULATION_OF_LYMPHOCYTE_APOPTOTIC_PROCESS	2/201	57/17872	0.134704319370168	0.28552233412294	0.20503482892185	PTEN/BCL6	2
GOBP_REGULATION_OF_PHOSPHATIDYLINOSITOL_3_KINASE_ACTIVITY	GOBP_REGULATION_OF_PHOSPHATIDYLINOSITOL_3_KINASE_ACTIVITY	GOBP_REGULATION_OF_PHOSPHATIDYLINOSITOL_3_KINASE_ACTIVITY	2/201	57/17872	0.134704319370168	0.28552233412294	0.20503482892185	FPR2/FLT1	2
GOBP_REGULATION_OF_TUMOR_NECROSIS_FACTOR_MEDIATED_SIGNALING_PATHWAY	GOBP_REGULATION_OF_TUMOR_NECROSIS_FACTOR_MEDIATED_SIGNALING_PATHWAY	GOBP_REGULATION_OF_TUMOR_NECROSIS_FACTOR_MEDIATED_SIGNALING_PATHWAY	2/201	57/17872	0.134704319370168	0.28552233412294	0.20503482892185	TNFAIP3/PTPN2	2
GOBP_RUFFLE_ORGANIZATION	GOBP_RUFFLE_ORGANIZATION	GOBP_RUFFLE_ORGANIZATION	2/201	57/17872	0.134704319370168	0.28552233412294	0.20503482892185	ICAM1/PLEK	2
GOBP_VESICLE_DOCKING	GOBP_VESICLE_DOCKING	GOBP_VESICLE_DOCKING	2/201	57/17872	0.134704319370168	0.28552233412294	0.20503482892185	STX11/PLEK	2
GOBP_PHENOL_CONTAINING_COMPOUND_METABOLIC_PROCESS	GOBP_PHENOL_CONTAINING_COMPOUND_METABOLIC_PROCESS	GOBP_PHENOL_CONTAINING_COMPOUND_METABOLIC_PROCESS	3/201	113/17872	0.134758797510544	0.28552233412294	0.20503482892185	GCH1/RAPGEF2/CTSB	3
GOBP_ORGAN_GROWTH	GOBP_ORGAN_GROWTH	GOBP_ORGAN_GROWTH	4/201	175/17872	0.13522291496905	0.28552233412294	0.20503482892185	PTEN/AKAP13/DUSP6/SAV1	4
GOBP_OSTEOBLAST_DIFFERENTIATION	GOBP_OSTEOBLAST_DIFFERENTIATION	GOBP_OSTEOBLAST_DIFFERENTIATION	5/201	241/17872	0.136229521965684	0.28552233412294	0.20503482892185	HNRNPC/AREG/TNF/CCL3/TNFAIP6	5
GOBP_BRANCHING_INVOLVED_IN_LABYRINTHINE_LAYER_MORPHOGENESIS	GOBP_BRANCHING_INVOLVED_IN_LABYRINTHINE_LAYER_MORPHOGENESIS	GOBP_BRANCHING_INVOLVED_IN_LABYRINTHINE_LAYER_MORPHOGENESIS	1/201	13/17872	0.136778885505089	0.28552233412294	0.20503482892185	ADM	1
GOBP_CYCLIC_NUCLEOTIDE_CATABOLIC_PROCESS	GOBP_CYCLIC_NUCLEOTIDE_CATABOLIC_PROCESS	GOBP_CYCLIC_NUCLEOTIDE_CATABOLIC_PROCESS	1/201	13/17872	0.136778885505089	0.28552233412294	0.20503482892185	PDE4B	1
GOBP_FRUCTOSE_METABOLIC_PROCESS	GOBP_FRUCTOSE_METABOLIC_PROCESS	GOBP_FRUCTOSE_METABOLIC_PROCESS	1/201	13/17872	0.136778885505089	0.28552233412294	0.20503482892185	PFKFB3	1
GOBP_INTERLEUKIN_18_PRODUCTION	GOBP_INTERLEUKIN_18_PRODUCTION	GOBP_INTERLEUKIN_18_PRODUCTION	1/201	13/17872	0.136778885505089	0.28552233412294	0.20503482892185	TNF	1
GOBP_NEGATIVE_REGULATION_OF_AMYLOID_FIBRIL_FORMATION	GOBP_NEGATIVE_REGULATION_OF_AMYLOID_FIBRIL_FORMATION	GOBP_NEGATIVE_REGULATION_OF_AMYLOID_FIBRIL_FORMATION	1/201	13/17872	0.136778885505089	0.28552233412294	0.20503482892185	LDLR	1
GOBP_NEGATIVE_REGULATION_OF_DENDRITIC_SPINE_DEVELOPMENT	GOBP_NEGATIVE_REGULATION_OF_DENDRITIC_SPINE_DEVELOPMENT	GOBP_NEGATIVE_REGULATION_OF_DENDRITIC_SPINE_DEVELOPMENT	1/201	13/17872	0.136778885505089	0.28552233412294	0.20503482892185	PTEN	1
GOBP_NEGATIVE_REGULATION_OF_GLYCOLYTIC_PROCESS	GOBP_NEGATIVE_REGULATION_OF_GLYCOLYTIC_PROCESS	GOBP_NEGATIVE_REGULATION_OF_GLYCOLYTIC_PROCESS	1/201	13/17872	0.136778885505089	0.28552233412294	0.20503482892185	STAT3	1
GOBP_NEGATIVE_REGULATION_OF_LIPOPOLYSACCHARIDE_MEDIATED_SIGNALING_PATHWAY	GOBP_NEGATIVE_REGULATION_OF_LIPOPOLYSACCHARIDE_MEDIATED_SIGNALING_PATHWAY	GOBP_NEGATIVE_REGULATION_OF_LIPOPOLYSACCHARIDE_MEDIATED_SIGNALING_PATHWAY	1/201	13/17872	0.136778885505089	0.28552233412294	0.20503482892185	TNFAIP3	1
GOBP_NEGATIVE_REGULATION_OF_MACROPHAGE_DERIVED_FOAM_CELL_DIFFERENTIATION	GOBP_NEGATIVE_REGULATION_OF_MACROPHAGE_DERIVED_FOAM_CELL_DIFFERENTIATION	GOBP_NEGATIVE_REGULATION_OF_MACROPHAGE_DERIVED_FOAM_CELL_DIFFERENTIATION	1/201	13/17872	0.136778885505089	0.28552233412294	0.20503482892185	NFKBIA	1
GOBP_NEGATIVE_REGULATION_OF_TOLL_LIKE_RECEPTOR_4_SIGNALING_PATHWAY	GOBP_NEGATIVE_REGULATION_OF_TOLL_LIKE_RECEPTOR_4_SIGNALING_PATHWAY	GOBP_NEGATIVE_REGULATION_OF_TOLL_LIKE_RECEPTOR_4_SIGNALING_PATHWAY	1/201	13/17872	0.136778885505089	0.28552233412294	0.20503482892185	TNFAIP3	1
GOBP_POLYOL_TRANSPORT	GOBP_POLYOL_TRANSPORT	GOBP_POLYOL_TRANSPORT	1/201	13/17872	0.136778885505089	0.28552233412294	0.20503482892185	AQP9	1
GOBP_POSITIVE_REGULATION_OF_ACTIN_FILAMENT_DEPOLYMERIZATION	GOBP_POSITIVE_REGULATION_OF_ACTIN_FILAMENT_DEPOLYMERIZATION	GOBP_POSITIVE_REGULATION_OF_ACTIN_FILAMENT_DEPOLYMERIZATION	1/201	13/17872	0.136778885505089	0.28552233412294	0.20503482892185	PLEK	1
GOBP_PRIMARY_MIRNA_PROCESSING	GOBP_PRIMARY_MIRNA_PROCESSING	GOBP_PRIMARY_MIRNA_PROCESSING	1/201	13/17872	0.136778885505089	0.28552233412294	0.20503482892185	STAT3	1
GOBP_REGULATION_OF_ATPASE_COUPLED_CALCIUM_TRANSMEMBRANE_TRANSPORTER_ACTIVITY	GOBP_REGULATION_OF_ATPASE_COUPLED_CALCIUM_TRANSMEMBRANE_TRANSPORTER_ACTIVITY	GOBP_REGULATION_OF_ATPASE_COUPLED_CALCIUM_TRANSMEMBRANE_TRANSPORTER_ACTIVITY	1/201	13/17872	0.136778885505089	0.28552233412294	0.20503482892185	VMP1	1
GOBP_REGULATION_OF_NUCLEAR_CELL_CYCLE_DNA_REPLICATION	GOBP_REGULATION_OF_NUCLEAR_CELL_CYCLE_DNA_REPLICATION	GOBP_REGULATION_OF_NUCLEAR_CELL_CYCLE_DNA_REPLICATION	1/201	13/17872	0.136778885505089	0.28552233412294	0.20503482892185	BCL6	1
GOBP_REGULATION_OF_RETROGRADE_PROTEIN_TRANSPORT_ER_TO_CYTOSOL	GOBP_REGULATION_OF_RETROGRADE_PROTEIN_TRANSPORT_ER_TO_CYTOSOL	GOBP_REGULATION_OF_RETROGRADE_PROTEIN_TRANSPORT_ER_TO_CYTOSOL	1/201	13/17872	0.136778885505089	0.28552233412294	0.20503482892185	UBAC2	1
GOBP_REGULATION_OF_SKELETAL_MUSCLE_CELL_PROLIFERATION	GOBP_REGULATION_OF_SKELETAL_MUSCLE_CELL_PROLIFERATION	GOBP_REGULATION_OF_SKELETAL_MUSCLE_CELL_PROLIFERATION	1/201	13/17872	0.136778885505089	0.28552233412294	0.20503482892185	CFLAR	1
GOBP_REGULATION_OF_STEROID_HORMONE_BIOSYNTHETIC_PROCESS	GOBP_REGULATION_OF_STEROID_HORMONE_BIOSYNTHETIC_PROCESS	GOBP_REGULATION_OF_STEROID_HORMONE_BIOSYNTHETIC_PROCESS	1/201	13/17872	0.136778885505089	0.28552233412294	0.20503482892185	ATP1A1	1
GOBP_RESPONSE_TO_LAMINAR_FLUID_SHEAR_STRESS	GOBP_RESPONSE_TO_LAMINAR_FLUID_SHEAR_STRESS	GOBP_RESPONSE_TO_LAMINAR_FLUID_SHEAR_STRESS	1/201	13/17872	0.136778885505089	0.28552233412294	0.20503482892185	NFE2L2	1
GOBP_RESPONSE_TO_PEPTIDOGLYCAN	GOBP_RESPONSE_TO_PEPTIDOGLYCAN	GOBP_RESPONSE_TO_PEPTIDOGLYCAN	1/201	13/17872	0.136778885505089	0.28552233412294	0.20503482892185	IRAK3	1
GOBP_SERTOLI_CELL_DEVELOPMENT	GOBP_SERTOLI_CELL_DEVELOPMENT	GOBP_SERTOLI_CELL_DEVELOPMENT	1/201	13/17872	0.136778885505089	0.28552233412294	0.20503482892185	IL1A	1
GOBP_SMAD_PROTEIN_COMPLEX_ASSEMBLY	GOBP_SMAD_PROTEIN_COMPLEX_ASSEMBLY	GOBP_SMAD_PROTEIN_COMPLEX_ASSEMBLY	1/201	13/17872	0.136778885505089	0.28552233412294	0.20503482892185	LDLRAD4	1
GOBP_T_CELL_EXTRAVASATION	GOBP_T_CELL_EXTRAVASATION	GOBP_T_CELL_EXTRAVASATION	1/201	13/17872	0.136778885505089	0.28552233412294	0.20503482892185	ICAM1	1
GOBP_T_HELPER_17_CELL_LINEAGE_COMMITMENT	GOBP_T_HELPER_17_CELL_LINEAGE_COMMITMENT	GOBP_T_HELPER_17_CELL_LINEAGE_COMMITMENT	1/201	13/17872	0.136778885505089	0.28552233412294	0.20503482892185	STAT3	1
GOBP_T_HELPER_2_CELL_CYTOKINE_PRODUCTION	GOBP_T_HELPER_2_CELL_CYTOKINE_PRODUCTION	GOBP_T_HELPER_2_CELL_CYTOKINE_PRODUCTION	1/201	13/17872	0.136778885505089	0.28552233412294	0.20503482892185	NLRP3	1
GOBP_TRAIL_ACTIVATED_APOPTOTIC_SIGNALING_PATHWAY	GOBP_TRAIL_ACTIVATED_APOPTOTIC_SIGNALING_PATHWAY	GOBP_TRAIL_ACTIVATED_APOPTOTIC_SIGNALING_PATHWAY	1/201	13/17872	0.136778885505089	0.28552233412294	0.20503482892185	PTEN	1
GOBP_BLOOD_VESSEL_ENDOTHELIAL_CELL_MIGRATION	GOBP_BLOOD_VESSEL_ENDOTHELIAL_CELL_MIGRATION	GOBP_BLOOD_VESSEL_ENDOTHELIAL_CELL_MIGRATION	4/201	176/17872	0.137229790817644	0.286059275122797	0.20542040858722	THBS1/TNF/NFE2L2/PTGS2	4
GOBP_MOLTING_CYCLE	GOBP_MOLTING_CYCLE	GOBP_MOLTING_CYCLE	3/201	114/17872	0.137323795499781	0.286059275122797	0.20542040858722	TNF/PTGS2/SAV1	3
GOBP_RECEPTOR_INTERNALIZATION	GOBP_RECEPTOR_INTERNALIZATION	GOBP_RECEPTOR_INTERNALIZATION	3/201	114/17872	0.137323795499781	0.286059275122797	0.20542040858722	INSR/ADM/CXCL8	3
GOBP_ACTIVATION_OF_INNATE_IMMUNE_RESPONSE	GOBP_ACTIVATION_OF_INNATE_IMMUNE_RESPONSE	GOBP_ACTIVATION_OF_INNATE_IMMUNE_RESPONSE	2/201	58/17872	0.138532608303257	0.286974146228206	0.206077381503749	HCK/TLR4	2
GOBP_ARACHIDONIC_ACID_METABOLIC_PROCESS	GOBP_ARACHIDONIC_ACID_METABOLIC_PROCESS	GOBP_ARACHIDONIC_ACID_METABOLIC_PROCESS	2/201	58/17872	0.138532608303257	0.286974146228206	0.206077381503749	TBXAS1/PTGS2	2
GOBP_CARDIAC_MUSCLE_CELL_PROLIFERATION	GOBP_CARDIAC_MUSCLE_CELL_PROLIFERATION	GOBP_CARDIAC_MUSCLE_CELL_PROLIFERATION	2/201	58/17872	0.138532608303257	0.286974146228206	0.206077381503749	PTEN/SAV1	2
GOBP_DENDRITIC_SPINE_MORPHOGENESIS	GOBP_DENDRITIC_SPINE_MORPHOGENESIS	GOBP_DENDRITIC_SPINE_MORPHOGENESIS	2/201	58/17872	0.138532608303257	0.286974146228206	0.206077381503749	SIPA1L1/PTEN	2
GOBP_NEGATIVE_REGULATION_OF_BMP_SIGNALING_PATHWAY	GOBP_NEGATIVE_REGULATION_OF_BMP_SIGNALING_PATHWAY	GOBP_NEGATIVE_REGULATION_OF_BMP_SIGNALING_PATHWAY	2/201	58/17872	0.138532608303257	0.286974146228206	0.206077381503749	HIPK2/TNFAIP6	2
GOBP_NEGATIVE_REGULATION_OF_PEPTIDYL_TYROSINE_PHOSPHORYLATION	GOBP_NEGATIVE_REGULATION_OF_PEPTIDYL_TYROSINE_PHOSPHORYLATION	GOBP_NEGATIVE_REGULATION_OF_PEPTIDYL_TYROSINE_PHOSPHORYLATION	2/201	58/17872	0.138532608303257	0.286974146228206	0.206077381503749	SAMSN1/PTPN2	2
GOBP_POSITIVE_REGULATION_OF_TYPE_I_INTERFERON_PRODUCTION	GOBP_POSITIVE_REGULATION_OF_TYPE_I_INTERFERON_PRODUCTION	GOBP_POSITIVE_REGULATION_OF_TYPE_I_INTERFERON_PRODUCTION	2/201	58/17872	0.138532608303257	0.286974146228206	0.206077381503749	IRF1/TLR4	2
GOBP_PROTEIN_K63_LINKED_UBIQUITINATION	GOBP_PROTEIN_K63_LINKED_UBIQUITINATION	GOBP_PROTEIN_K63_LINKED_UBIQUITINATION	2/201	58/17872	0.138532608303257	0.286974146228206	0.206077381503749	PELI1/TRAF1	2
GOBP_POTASSIUM_ION_TRANSPORT	GOBP_POTASSIUM_ION_TRANSPORT	GOBP_POTASSIUM_ION_TRANSPORT	5/201	243/17872	0.139616750890444	0.289019269886325	0.207545993690093	KCNIP4/SLC1A3/ATP1A1/KCNJ2/KCNMA1	5
GOBP_UNSATURATED_FATTY_ACID_METABOLIC_PROCESS	GOBP_UNSATURATED_FATTY_ACID_METABOLIC_PROCESS	GOBP_UNSATURATED_FATTY_ACID_METABOLIC_PROCESS	3/201	115/17872	0.139905486837474	0.289416135392638	0.207830984534827	IL1B/TBXAS1/PTGS2	3
GOBP_REGULATION_OF_REPRODUCTIVE_PROCESS	GOBP_REGULATION_OF_REPRODUCTIVE_PROCESS	GOBP_REGULATION_OF_REPRODUCTIVE_PROCESS	4/201	178/17872	0.1412796321561	0.290167644713989	0.208370646644306	OOEP/IL1A/INSR/DUSP1	4
GOBP_PROTEIN_COMPLEX_OLIGOMERIZATION	GOBP_PROTEIN_COMPLEX_OLIGOMERIZATION	GOBP_PROTEIN_COMPLEX_OLIGOMERIZATION	5/201	244/17872	0.141324237525993	0.290167644713989	0.208370646644306	SOD2/ALDH1A2/EHD1/KCNJ2/SLC1A2	5
GOBP_PROTEIN_POLYUBIQUITINATION	GOBP_PROTEIN_POLYUBIQUITINATION	GOBP_PROTEIN_POLYUBIQUITINATION	5/201	244/17872	0.141324237525993	0.290167644713989	0.208370646644306	TNFAIP3/PELI1/RNF144B/RNF19B/TRAF1	5
GOBP_CALCIUM_ION_TRANSMEMBRANE_TRANSPORT	GOBP_CALCIUM_ION_TRANSMEMBRANE_TRANSPORT	GOBP_CALCIUM_ION_TRANSMEMBRANE_TRANSPORT	6/201	313/17872	0.142184344191889	0.290167644713989	0.208370646644306	PDE4B/SESTD1/CCL3/PRKCE/TMEM165/VMP1	6
GOBP_INSULIN_SECRETION_INVOLVED_IN_CELLULAR_RESPONSE_TO_GLUCOSE_STIMULUS	GOBP_INSULIN_SECRETION_INVOLVED_IN_CELLULAR_RESPONSE_TO_GLUCOSE_STIMULUS	GOBP_INSULIN_SECRETION_INVOLVED_IN_CELLULAR_RESPONSE_TO_GLUCOSE_STIMULUS	2/201	59/17872	0.142384544149368	0.290167644713989	0.208370646644306	PRKCE/KLF7	2
GOBP_MORPHOGENESIS_OF_AN_EPITHELIAL_SHEET	GOBP_MORPHOGENESIS_OF_AN_EPITHELIAL_SHEET	GOBP_MORPHOGENESIS_OF_AN_EPITHELIAL_SHEET	2/201	59/17872	0.142384544149368	0.290167644713989	0.208370646644306	CD44/PTEN	2
GOBP_NEGATIVE_REGULATION_OF_FAT_CELL_DIFFERENTIATION	GOBP_NEGATIVE_REGULATION_OF_FAT_CELL_DIFFERENTIATION	GOBP_NEGATIVE_REGULATION_OF_FAT_CELL_DIFFERENTIATION	2/201	59/17872	0.142384544149368	0.290167644713989	0.208370646644306	SOD2/TNF	2
GOBP_NEURON_PROJECTION_REGENERATION	GOBP_NEURON_PROJECTION_REGENERATION	GOBP_NEURON_PROJECTION_REGENERATION	2/201	59/17872	0.142384544149368	0.290167644713989	0.208370646644306	PTEN/ADM	2
GOBP_REGULATION_OF_PHOSPHOPROTEIN_PHOSPHATASE_ACTIVITY	GOBP_REGULATION_OF_PHOSPHOPROTEIN_PHOSPHATASE_ACTIVITY	GOBP_REGULATION_OF_PHOSPHOPROTEIN_PHOSPHATASE_ACTIVITY	2/201	59/17872	0.142384544149368	0.290167644713989	0.208370646644306	PPP1R15A/TNF	2
GOBP_RESPONSE_TO_CADMIUM_ION	GOBP_RESPONSE_TO_CADMIUM_ION	GOBP_RESPONSE_TO_CADMIUM_ION	2/201	59/17872	0.142384544149368	0.290167644713989	0.208370646644306	SOD2/MT2A	2
GOBP_SECONDARY_METABOLIC_PROCESS	GOBP_SECONDARY_METABOLIC_PROCESS	GOBP_SECONDARY_METABOLIC_PROCESS	2/201	59/17872	0.142384544149368	0.290167644713989	0.208370646644306	RAPGEF2/NFE2L2	2
GOBP_NEGATIVE_REGULATION_OF_GROWTH	GOBP_NEGATIVE_REGULATION_OF_GROWTH	GOBP_NEGATIVE_REGULATION_OF_GROWTH	5/201	245/17872	0.14304088086697	0.290167644713989	0.208370646644306	SCGB3A1/PTEN/BCL6/MT2A/SAV1	5
GOBP_PROTEIN_CONTAINING_COMPLEX_DISASSEMBLY	GOBP_PROTEIN_CONTAINING_COMPLEX_DISASSEMBLY	GOBP_PROTEIN_CONTAINING_COMPLEX_DISASSEMBLY	5/201	245/17872	0.14304088086697	0.290167644713989	0.208370646644306	IRAK3/INSR/TNF/PLEK/VMP1	5
GOBP_POSITIVE_REGULATION_OF_RESPONSE_TO_BIOTIC_STIMULUS	GOBP_POSITIVE_REGULATION_OF_RESPONSE_TO_BIOTIC_STIMULUS	GOBP_POSITIVE_REGULATION_OF_RESPONSE_TO_BIOTIC_STIMULUS	4/201	179/17872	0.143322341514518	0.290167644713989	0.208370646644306	FPR2/HCK/EREG/TLR4	4
GOBP_REGULATION_OF_OSSIFICATION	GOBP_REGULATION_OF_OSSIFICATION	GOBP_REGULATION_OF_OSSIFICATION	3/201	117/17872	0.145117763857057	0.290167644713989	0.208370646644306	ZBTB16/CCL3/SGMS2	3
GOBP_CELL_COMMUNICATION_INVOLVED_IN_CARDIAC_CONDUCTION	GOBP_CELL_COMMUNICATION_INVOLVED_IN_CARDIAC_CONDUCTION	GOBP_CELL_COMMUNICATION_INVOLVED_IN_CARDIAC_CONDUCTION	2/201	60/17872	0.146259118396393	0.290167644713989	0.208370646644306	ATP1A1/PKP2	2
GOBP_NEGATIVE_REGULATION_OF_HORMONE_SECRETION	GOBP_NEGATIVE_REGULATION_OF_HORMONE_SECRETION	GOBP_NEGATIVE_REGULATION_OF_HORMONE_SECRETION	2/201	60/17872	0.146259118396393	0.290167644713989	0.208370646644306	IL1B/KLF7	2
GOBP_POSITIVE_REGULATION_OF_NUCLEOCYTOPLASMIC_TRANSPORT	GOBP_POSITIVE_REGULATION_OF_NUCLEOCYTOPLASMIC_TRANSPORT	GOBP_POSITIVE_REGULATION_OF_NUCLEOCYTOPLASMIC_TRANSPORT	2/201	60/17872	0.146259118396393	0.290167644713989	0.208370646644306	IL1B/PTGS2	2
GOBP_REGULATION_OF_ALTERNATIVE_MRNA_SPLICING_VIA_SPLICEOSOME	GOBP_REGULATION_OF_ALTERNATIVE_MRNA_SPLICING_VIA_SPLICEOSOME	GOBP_REGULATION_OF_ALTERNATIVE_MRNA_SPLICING_VIA_SPLICEOSOME	2/201	60/17872	0.146259118396393	0.290167644713989	0.208370646644306	MBNL1/RBFOX2	2
GOBP_REGULATION_OF_JUN_KINASE_ACTIVITY	GOBP_REGULATION_OF_JUN_KINASE_ACTIVITY	GOBP_REGULATION_OF_JUN_KINASE_ACTIVITY	2/201	60/17872	0.146259118396393	0.290167644713989	0.208370646644306	PTPN1/TNF	2
GOBP_CD8_POSITIVE_ALPHA_BETA_T_CELL_DIFFERENTIATION	GOBP_CD8_POSITIVE_ALPHA_BETA_T_CELL_DIFFERENTIATION	GOBP_CD8_POSITIVE_ALPHA_BETA_T_CELL_DIFFERENTIATION	1/201	14/17872	0.146494291967572	0.290167644713989	0.208370646644306	IRF1	1
GOBP_COMPLEMENT_DEPENDENT_CYTOTOXICITY	GOBP_COMPLEMENT_DEPENDENT_CYTOTOXICITY	GOBP_COMPLEMENT_DEPENDENT_CYTOTOXICITY	1/201	14/17872	0.146494291967572	0.290167644713989	0.208370646644306	CD55	1
GOBP_DETECTION_OF_MECHANICAL_STIMULUS_INVOLVED_IN_SENSORY_PERCEPTION_OF_PAIN	GOBP_DETECTION_OF_MECHANICAL_STIMULUS_INVOLVED_IN_SENSORY_PERCEPTION_OF_PAIN	GOBP_DETECTION_OF_MECHANICAL_STIMULUS_INVOLVED_IN_SENSORY_PERCEPTION_OF_PAIN	1/201	14/17872	0.146494291967572	0.290167644713989	0.208370646644306	TNF	1
GOBP_DICARBOXYLIC_ACID_BIOSYNTHETIC_PROCESS	GOBP_DICARBOXYLIC_ACID_BIOSYNTHETIC_PROCESS	GOBP_DICARBOXYLIC_ACID_BIOSYNTHETIC_PROCESS	1/201	14/17872	0.146494291967572	0.290167644713989	0.208370646644306	KYNU	1
GOBP_ESTABLISHMENT_OF_ENDOTHELIAL_INTESTINAL_BARRIER	GOBP_ESTABLISHMENT_OF_ENDOTHELIAL_INTESTINAL_BARRIER	GOBP_ESTABLISHMENT_OF_ENDOTHELIAL_INTESTINAL_BARRIER	1/201	14/17872	0.146494291967572	0.290167644713989	0.208370646644306	RAPGEF2	1
GOBP_IMMUNOLOGICAL_MEMORY_FORMATION_PROCESS	GOBP_IMMUNOLOGICAL_MEMORY_FORMATION_PROCESS	GOBP_IMMUNOLOGICAL_MEMORY_FORMATION_PROCESS	1/201	14/17872	0.146494291967572	0.290167644713989	0.208370646644306	BCL6	1
GOBP_INDOLALKYLAMINE_METABOLIC_PROCESS	GOBP_INDOLALKYLAMINE_METABOLIC_PROCESS	GOBP_INDOLALKYLAMINE_METABOLIC_PROCESS	1/201	14/17872	0.146494291967572	0.290167644713989	0.208370646644306	KYNU	1
GOBP_INDUCTION_OF_POSITIVE_CHEMOTAXIS	GOBP_INDUCTION_OF_POSITIVE_CHEMOTAXIS	GOBP_INDUCTION_OF_POSITIVE_CHEMOTAXIS	1/201	14/17872	0.146494291967572	0.290167644713989	0.208370646644306	CXCL8	1
GOBP_IRON_COORDINATION_ENTITY_TRANSPORT	GOBP_IRON_COORDINATION_ENTITY_TRANSPORT	GOBP_IRON_COORDINATION_ENTITY_TRANSPORT	1/201	14/17872	0.146494291967572	0.290167644713989	0.208370646644306	FLVCR2	1
GOBP_KETONE_CATABOLIC_PROCESS	GOBP_KETONE_CATABOLIC_PROCESS	GOBP_KETONE_CATABOLIC_PROCESS	1/201	14/17872	0.146494291967572	0.290167644713989	0.208370646644306	KYNU	1
GOBP_MALE_SEX_DETERMINATION	GOBP_MALE_SEX_DETERMINATION	GOBP_MALE_SEX_DETERMINATION	1/201	14/17872	0.146494291967572	0.290167644713989	0.208370646644306	INSR	1
GOBP_MECHANOSENSORY_BEHAVIOR	GOBP_MECHANOSENSORY_BEHAVIOR	GOBP_MECHANOSENSORY_BEHAVIOR	1/201	14/17872	0.146494291967572	0.290167644713989	0.208370646644306	SLC1A3	1
GOBP_MITOTIC_DNA_REPLICATION	GOBP_MITOTIC_DNA_REPLICATION	GOBP_MITOTIC_DNA_REPLICATION	1/201	14/17872	0.146494291967572	0.290167644713989	0.208370646644306	BCL6	1
GOBP_MUCUS_SECRETION	GOBP_MUCUS_SECRETION	GOBP_MUCUS_SECRETION	1/201	14/17872	0.146494291967572	0.290167644713989	0.208370646644306	PRKCE	1
GOBP_NATURAL_KILLER_CELL_PROLIFERATION	GOBP_NATURAL_KILLER_CELL_PROLIFERATION	GOBP_NATURAL_KILLER_CELL_PROLIFERATION	1/201	14/17872	0.146494291967572	0.290167644713989	0.208370646644306	SLAMF1	1
GOBP_NEGATIVE_REGULATION_OF_B_CELL_APOPTOTIC_PROCESS	GOBP_NEGATIVE_REGULATION_OF_B_CELL_APOPTOTIC_PROCESS	GOBP_NEGATIVE_REGULATION_OF_B_CELL_APOPTOTIC_PROCESS	1/201	14/17872	0.146494291967572	0.290167644713989	0.208370646644306	BCL6	1
GOBP_NEGATIVE_REGULATION_OF_INTERFERON_BETA_PRODUCTION	GOBP_NEGATIVE_REGULATION_OF_INTERFERON_BETA_PRODUCTION	GOBP_NEGATIVE_REGULATION_OF_INTERFERON_BETA_PRODUCTION	1/201	14/17872	0.146494291967572	0.290167644713989	0.208370646644306	REL	1
GOBP_NEGATIVE_REGULATION_OF_TYPE_2_IMMUNE_RESPONSE	GOBP_NEGATIVE_REGULATION_OF_TYPE_2_IMMUNE_RESPONSE	GOBP_NEGATIVE_REGULATION_OF_TYPE_2_IMMUNE_RESPONSE	1/201	14/17872	0.146494291967572	0.290167644713989	0.208370646644306	BCL6	1
GOBP_NEPHRON_TUBULE_EPITHELIAL_CELL_DIFFERENTIATION	GOBP_NEPHRON_TUBULE_EPITHELIAL_CELL_DIFFERENTIATION	GOBP_NEPHRON_TUBULE_EPITHELIAL_CELL_DIFFERENTIATION	1/201	14/17872	0.146494291967572	0.290167644713989	0.208370646644306	MTSS1	1
GOBP_NERVOUS_SYSTEM_PROCESS_INVOLVED_IN_REGULATION_OF_SYSTEMIC_ARTERIAL_BLOOD_PRESSURE	GOBP_NERVOUS_SYSTEM_PROCESS_INVOLVED_IN_REGULATION_OF_SYSTEMIC_ARTERIAL_BLOOD_PRESSURE	GOBP_NERVOUS_SYSTEM_PROCESS_INVOLVED_IN_REGULATION_OF_SYSTEMIC_ARTERIAL_BLOOD_PRESSURE	1/201	14/17872	0.146494291967572	0.290167644713989	0.208370646644306	SOD2	1
GOBP_POSITIVE_REGULATION_OF_ERAD_PATHWAY	GOBP_POSITIVE_REGULATION_OF_ERAD_PATHWAY	GOBP_POSITIVE_REGULATION_OF_ERAD_PATHWAY	1/201	14/17872	0.146494291967572	0.290167644713989	0.208370646644306	NFE2L2	1
GOBP_POSITIVE_REGULATION_OF_KERATINOCYTE_PROLIFERATION	GOBP_POSITIVE_REGULATION_OF_KERATINOCYTE_PROLIFERATION	GOBP_POSITIVE_REGULATION_OF_KERATINOCYTE_PROLIFERATION	1/201	14/17872	0.146494291967572	0.290167644713989	0.208370646644306	AREG	1
GOBP_POSITIVE_REGULATION_OF_STRIATED_MUSCLE_CONTRACTION	GOBP_POSITIVE_REGULATION_OF_STRIATED_MUSCLE_CONTRACTION	GOBP_POSITIVE_REGULATION_OF_STRIATED_MUSCLE_CONTRACTION	1/201	14/17872	0.146494291967572	0.290167644713989	0.208370646644306	ATP1A1	1
GOBP_POSITIVE_REGULATION_OF_SYNAPTIC_TRANSMISSION_GABAERGIC	GOBP_POSITIVE_REGULATION_OF_SYNAPTIC_TRANSMISSION_GABAERGIC	GOBP_POSITIVE_REGULATION_OF_SYNAPTIC_TRANSMISSION_GABAERGIC	1/201	14/17872	0.146494291967572	0.290167644713989	0.208370646644306	PRKCE	1
GOBP_POSITIVE_REGULATION_OF_T_HELPER_17_TYPE_IMMUNE_RESPONSE	GOBP_POSITIVE_REGULATION_OF_T_HELPER_17_TYPE_IMMUNE_RESPONSE	GOBP_POSITIVE_REGULATION_OF_T_HELPER_17_TYPE_IMMUNE_RESPONSE	1/201	14/17872	0.146494291967572	0.290167644713989	0.208370646644306	NFKBIZ	1
GOBP_POSITIVE_REGULATION_OF_TRIGLYCERIDE_BIOSYNTHETIC_PROCESS	GOBP_POSITIVE_REGULATION_OF_TRIGLYCERIDE_BIOSYNTHETIC_PROCESS	GOBP_POSITIVE_REGULATION_OF_TRIGLYCERIDE_BIOSYNTHETIC_PROCESS	1/201	14/17872	0.146494291967572	0.290167644713989	0.208370646644306	LDLR	1
GOBP_POSITIVE_REGULATION_OF_VASCULAR_ASSOCIATED_SMOOTH_MUSCLE_CELL_DIFFERENTIATION	GOBP_POSITIVE_REGULATION_OF_VASCULAR_ASSOCIATED_SMOOTH_MUSCLE_CELL_DIFFERENTIATION	GOBP_POSITIVE_REGULATION_OF_VASCULAR_ASSOCIATED_SMOOTH_MUSCLE_CELL_DIFFERENTIATION	1/201	14/17872	0.146494291967572	0.290167644713989	0.208370646644306	SOD2	1
GOBP_POSITIVE_THYMIC_T_CELL_SELECTION	GOBP_POSITIVE_THYMIC_T_CELL_SELECTION	GOBP_POSITIVE_THYMIC_T_CELL_SELECTION	1/201	14/17872	0.146494291967572	0.290167644713989	0.208370646644306	PTPN2	1
GOBP_POSTSYNAPTIC_MODULATION_OF_CHEMICAL_SYNAPTIC_TRANSMISSION	GOBP_POSTSYNAPTIC_MODULATION_OF_CHEMICAL_SYNAPTIC_TRANSMISSION	GOBP_POSTSYNAPTIC_MODULATION_OF_CHEMICAL_SYNAPTIC_TRANSMISSION	1/201	14/17872	0.146494291967572	0.290167644713989	0.208370646644306	EIF4E	1
GOBP_PYRIMIDINE_CONTAINING_COMPOUND_TRANSMEMBRANE_TRANSPORT	GOBP_PYRIMIDINE_CONTAINING_COMPOUND_TRANSMEMBRANE_TRANSPORT	GOBP_PYRIMIDINE_CONTAINING_COMPOUND_TRANSMEMBRANE_TRANSPORT	1/201	14/17872	0.146494291967572	0.290167644713989	0.208370646644306	AQP9	1
GOBP_RAP_PROTEIN_SIGNAL_TRANSDUCTION	GOBP_RAP_PROTEIN_SIGNAL_TRANSDUCTION	GOBP_RAP_PROTEIN_SIGNAL_TRANSDUCTION	1/201	14/17872	0.146494291967572	0.290167644713989	0.208370646644306	RAPGEF2	1
GOBP_REGULATION_OF_AMINO_ACID_TRANSMEMBRANE_TRANSPORT	GOBP_REGULATION_OF_AMINO_ACID_TRANSMEMBRANE_TRANSPORT	GOBP_REGULATION_OF_AMINO_ACID_TRANSMEMBRANE_TRANSPORT	1/201	14/17872	0.146494291967572	0.290167644713989	0.208370646644306	TNF	1
GOBP_REGULATION_OF_CGMP_MEDIATED_SIGNALING	GOBP_REGULATION_OF_CGMP_MEDIATED_SIGNALING	GOBP_REGULATION_OF_CGMP_MEDIATED_SIGNALING	1/201	14/17872	0.146494291967572	0.290167644713989	0.208370646644306	THBS1	1
GOBP_REGULATION_OF_FIBRINOLYSIS	GOBP_REGULATION_OF_FIBRINOLYSIS	GOBP_REGULATION_OF_FIBRINOLYSIS	1/201	14/17872	0.146494291967572	0.290167644713989	0.208370646644306	THBS1	1
GOBP_REGULATION_OF_GONAD_DEVELOPMENT	GOBP_REGULATION_OF_GONAD_DEVELOPMENT	GOBP_REGULATION_OF_GONAD_DEVELOPMENT	1/201	14/17872	0.146494291967572	0.290167644713989	0.208370646644306	INSR	1
GOBP_REGULATION_OF_HIGH_VOLTAGE_GATED_CALCIUM_CHANNEL_ACTIVITY	GOBP_REGULATION_OF_HIGH_VOLTAGE_GATED_CALCIUM_CHANNEL_ACTIVITY	GOBP_REGULATION_OF_HIGH_VOLTAGE_GATED_CALCIUM_CHANNEL_ACTIVITY	1/201	14/17872	0.146494291967572	0.290167644713989	0.208370646644306	PDE4B	1
GOBP_REGULATION_OF_IRE1_MEDIATED_UNFOLDED_PROTEIN_RESPONSE	GOBP_REGULATION_OF_IRE1_MEDIATED_UNFOLDED_PROTEIN_RESPONSE	GOBP_REGULATION_OF_IRE1_MEDIATED_UNFOLDED_PROTEIN_RESPONSE	1/201	14/17872	0.146494291967572	0.290167644713989	0.208370646644306	PTPN1	1
GOBP_REGULATION_OF_KERATINOCYTE_MIGRATION	GOBP_REGULATION_OF_KERATINOCYTE_MIGRATION	GOBP_REGULATION_OF_KERATINOCYTE_MIGRATION	1/201	14/17872	0.146494291967572	0.290167644713989	0.208370646644306	PTEN	1
GOBP_REGULATION_OF_RELAXATION_OF_MUSCLE	GOBP_REGULATION_OF_RELAXATION_OF_MUSCLE	GOBP_REGULATION_OF_RELAXATION_OF_MUSCLE	1/201	14/17872	0.146494291967572	0.290167644713989	0.208370646644306	PDE4B	1
GOBP_REGULATION_OF_RESPONSE_TO_OSMOTIC_STRESS	GOBP_REGULATION_OF_RESPONSE_TO_OSMOTIC_STRESS	GOBP_REGULATION_OF_RESPONSE_TO_OSMOTIC_STRESS	1/201	14/17872	0.146494291967572	0.290167644713989	0.208370646644306	PTGS2	1
GOBP_REGULATION_OF_SECONDARY_METABOLIC_PROCESS	GOBP_REGULATION_OF_SECONDARY_METABOLIC_PROCESS	GOBP_REGULATION_OF_SECONDARY_METABOLIC_PROCESS	1/201	14/17872	0.146494291967572	0.290167644713989	0.208370646644306	RAPGEF2	1
GOBP_REGULATION_OF_TAU_PROTEIN_KINASE_ACTIVITY	GOBP_REGULATION_OF_TAU_PROTEIN_KINASE_ACTIVITY	GOBP_REGULATION_OF_TAU_PROTEIN_KINASE_ACTIVITY	1/201	14/17872	0.146494291967572	0.290167644713989	0.208370646644306	EGR1	1
GOBP_REGULATION_OF_TRANSLATIONAL_INITIATION_IN_RESPONSE_TO_STRESS	GOBP_REGULATION_OF_TRANSLATIONAL_INITIATION_IN_RESPONSE_TO_STRESS	GOBP_REGULATION_OF_TRANSLATIONAL_INITIATION_IN_RESPONSE_TO_STRESS	1/201	14/17872	0.146494291967572	0.290167644713989	0.208370646644306	PPP1R15A	1
GOBP_RESPONSE_TO_EPINEPHRINE	GOBP_RESPONSE_TO_EPINEPHRINE	GOBP_RESPONSE_TO_EPINEPHRINE	1/201	14/17872	0.146494291967572	0.290167644713989	0.208370646644306	PDE4B	1
GOBP_CELLULAR_NITROGEN_COMPOUND_CATABOLIC_PROCESS	GOBP_CELLULAR_NITROGEN_COMPOUND_CATABOLIC_PROCESS	GOBP_CELLULAR_NITROGEN_COMPOUND_CATABOLIC_PROCESS	8/201	459/17872	0.147009838203421	0.290995585508165	0.208965194526568	HNRNPC/ZFP36/SCGB1A1/PDE4B/ISG20/KYNU/BTG2/TET2	8
GOBP_SENSORY_SYSTEM_DEVELOPMENT	GOBP_SENSORY_SYSTEM_DEVELOPMENT	GOBP_SENSORY_SYSTEM_DEVELOPMENT	7/201	388/17872	0.148539669432978	0.293828802333271	0.210999739840925	ALDH1A2/CLIC4/HIPK2/ATF6/LIMK2/STAT3/FLT1	7
GOBP_NOTCH_SIGNALING_PATHWAY	GOBP_NOTCH_SIGNALING_PATHWAY	GOBP_NOTCH_SIGNALING_PATHWAY	4/201	182/17872	0.149520070416577	0.295572147152187	0.212251643331404	NFKBIA/BCL6/STAT3/IL2RA	4
GOBP_ORGANIC_ACID_BIOSYNTHETIC_PROCESS	GOBP_ORGANIC_ACID_BIOSYNTHETIC_PROCESS	GOBP_ORGANIC_ACID_BIOSYNTHETIC_PROCESS	6/201	318/17872	0.149783170202947	0.295847678492043	0.212449503583926	IL1B/ALDH1A2/TBXAS1/SLC1A3/KYNU/PTGS2	6
GOBP_NEGATIVE_REGULATION_OF_LIPID_BIOSYNTHETIC_PROCESS	GOBP_NEGATIVE_REGULATION_OF_LIPID_BIOSYNTHETIC_PROCESS	GOBP_NEGATIVE_REGULATION_OF_LIPID_BIOSYNTHETIC_PROCESS	2/201	61/17872	0.150155342017081	0.295847678492043	0.212449503583926	NFKB1/ATP1A1	2
GOBP_POSITIVE_REGULATION_OF_DEPHOSPHORYLATION	GOBP_POSITIVE_REGULATION_OF_DEPHOSPHORYLATION	GOBP_POSITIVE_REGULATION_OF_DEPHOSPHORYLATION	2/201	61/17872	0.150155342017081	0.295847678492043	0.212449503583926	PPP1R15A/PLEK	2
GOBP_POSITIVE_REGULATION_OF_INTRINSIC_APOPTOTIC_SIGNALING_PATHWAY	GOBP_POSITIVE_REGULATION_OF_INTRINSIC_APOPTOTIC_SIGNALING_PATHWAY	GOBP_POSITIVE_REGULATION_OF_INTRINSIC_APOPTOTIC_SIGNALING_PATHWAY	2/201	61/17872	0.150155342017081	0.295847678492043	0.212449503583926	PMAIP1/PTPN2	2
GOBP_REGULATION_OF_NEUROTRANSMITTER_RECEPTOR_ACTIVITY	GOBP_REGULATION_OF_NEUROTRANSMITTER_RECEPTOR_ACTIVITY	GOBP_REGULATION_OF_NEUROTRANSMITTER_RECEPTOR_ACTIVITY	2/201	61/17872	0.150155342017081	0.295847678492043	0.212449503583926	DLGAP1/IFNGR2	2
GOBP_GLYCOPROTEIN_BIOSYNTHETIC_PROCESS	GOBP_GLYCOPROTEIN_BIOSYNTHETIC_PROCESS	GOBP_GLYCOPROTEIN_BIOSYNTHETIC_PROCESS	6/201	319/17872	0.151324692162294	0.297954822917573	0.21396265315287	ST6GALNAC3/TMEM165/CHST11/CSGALNACT2/TNIP1/TET2	6
GOBP_BONE_MINERALIZATION	GOBP_BONE_MINERALIZATION	GOBP_BONE_MINERALIZATION	3/201	120/17872	0.153053971907413	0.298876096375207	0.214624223626355	CCL3/PTGS2/SGMS2	3
GOBP_MEMBRANE_BIOGENESIS	GOBP_MEMBRANE_BIOGENESIS	GOBP_MEMBRANE_BIOGENESIS	2/201	62/17872	0.154072245162012	0.298876096375207	0.214624223626355	PTEN/IL1RAPL1	2
GOBP_REGULATION_OF_MITOTIC_CELL_CYCLE_PHASE_TRANSITION	GOBP_REGULATION_OF_MITOTIC_CELL_CYCLE_PHASE_TRANSITION	GOBP_REGULATION_OF_MITOTIC_CELL_CYCLE_PHASE_TRANSITION	6/201	321/17872	0.15442913704312	0.298876096375207	0.214624223626355	GPR132/PTEN/DUSP1/PLK3/TEX14/CCND3	6
GOBP_ICOSANOID_METABOLIC_PROCESS	GOBP_ICOSANOID_METABOLIC_PROCESS	GOBP_ICOSANOID_METABOLIC_PROCESS	3/201	121/17872	0.155729602773473	0.298876096375207	0.214624223626355	IL1B/TBXAS1/PTGS2	3
GOBP_BUNDLE_OF_HIS_CELL_TO_PURKINJE_MYOCYTE_COMMUNICATION	GOBP_BUNDLE_OF_HIS_CELL_TO_PURKINJE_MYOCYTE_COMMUNICATION	GOBP_BUNDLE_OF_HIS_CELL_TO_PURKINJE_MYOCYTE_COMMUNICATION	1/201	15/17872	0.156100891100426	0.298876096375207	0.214624223626355	PKP2	1
GOBP_CYTOPLASMIC_SEQUESTERING_OF_TRANSCRIPTION_FACTOR	GOBP_CYTOPLASMIC_SEQUESTERING_OF_TRANSCRIPTION_FACTOR	GOBP_CYTOPLASMIC_SEQUESTERING_OF_TRANSCRIPTION_FACTOR	1/201	15/17872	0.156100891100426	0.298876096375207	0.214624223626355	NFKBIA	1
GOBP_DENDRITIC_CELL_ANTIGEN_PROCESSING_AND_PRESENTATION	GOBP_DENDRITIC_CELL_ANTIGEN_PROCESSING_AND_PRESENTATION	GOBP_DENDRITIC_CELL_ANTIGEN_PROCESSING_AND_PRESENTATION	1/201	15/17872	0.156100891100426	0.298876096375207	0.214624223626355	THBS1	1
GOBP_DETOXIFICATION_OF_COPPER_ION	GOBP_DETOXIFICATION_OF_COPPER_ION	GOBP_DETOXIFICATION_OF_COPPER_ION	1/201	15/17872	0.156100891100426	0.298876096375207	0.214624223626355	MT2A	1
GOBP_ESTROUS_CYCLE	GOBP_ESTROUS_CYCLE	GOBP_ESTROUS_CYCLE	1/201	15/17872	0.156100891100426	0.298876096375207	0.214624223626355	EGR1	1
GOBP_G_PROTEIN_COUPLED_RECEPTOR_INTERNALIZATION	GOBP_G_PROTEIN_COUPLED_RECEPTOR_INTERNALIZATION	GOBP_G_PROTEIN_COUPLED_RECEPTOR_INTERNALIZATION	1/201	15/17872	0.156100891100426	0.298876096375207	0.214624223626355	ADM	1
GOBP_GLUCOCORTICOID_BIOSYNTHETIC_PROCESS	GOBP_GLUCOCORTICOID_BIOSYNTHETIC_PROCESS	GOBP_GLUCOCORTICOID_BIOSYNTHETIC_PROCESS	1/201	15/17872	0.156100891100426	0.298876096375207	0.214624223626355	ATP1A1	1
GOBP_HIGH_DENSITY_LIPOPROTEIN_PARTICLE_CLEARANCE	GOBP_HIGH_DENSITY_LIPOPROTEIN_PARTICLE_CLEARANCE	GOBP_HIGH_DENSITY_LIPOPROTEIN_PARTICLE_CLEARANCE	1/201	15/17872	0.156100891100426	0.298876096375207	0.214624223626355	LDLR	1
GOBP_METANEPHRIC_RENAL_VESICLE_MORPHOGENESIS	GOBP_METANEPHRIC_RENAL_VESICLE_MORPHOGENESIS	GOBP_METANEPHRIC_RENAL_VESICLE_MORPHOGENESIS	1/201	15/17872	0.156100891100426	0.298876096375207	0.214624223626355	FMN1	1
GOBP_METHYLGUANOSINE_CAP_DECAPPING	GOBP_METHYLGUANOSINE_CAP_DECAPPING	GOBP_METHYLGUANOSINE_CAP_DECAPPING	1/201	15/17872	0.156100891100426	0.298876096375207	0.214624223626355	ZFP36	1
GOBP_NEGATIVE_REGULATION_OF_AMINO_ACID_TRANSPORT	GOBP_NEGATIVE_REGULATION_OF_AMINO_ACID_TRANSPORT	GOBP_NEGATIVE_REGULATION_OF_AMINO_ACID_TRANSPORT	1/201	15/17872	0.156100891100426	0.298876096375207	0.214624223626355	TNF	1
GOBP_NEGATIVE_REGULATION_OF_ASTROCYTE_DIFFERENTIATION	GOBP_NEGATIVE_REGULATION_OF_ASTROCYTE_DIFFERENTIATION	GOBP_NEGATIVE_REGULATION_OF_ASTROCYTE_DIFFERENTIATION	1/201	15/17872	0.156100891100426	0.298876096375207	0.214624223626355	LDLR	1
GOBP_NEGATIVE_REGULATION_OF_CELL_ADHESION_MOLECULE_PRODUCTION	GOBP_NEGATIVE_REGULATION_OF_CELL_ADHESION_MOLECULE_PRODUCTION	GOBP_NEGATIVE_REGULATION_OF_CELL_ADHESION_MOLECULE_PRODUCTION	1/201	15/17872	0.156100891100426	0.298876096375207	0.214624223626355	CXCL8	1
GOBP_NEGATIVE_REGULATION_OF_DNA_DAMAGE_RESPONSE_SIGNAL_TRANSDUCTION_BY_P53_CLASS_MEDIATOR	GOBP_NEGATIVE_REGULATION_OF_DNA_DAMAGE_RESPONSE_SIGNAL_TRANSDUCTION_BY_P53_CLASS_MEDIATOR	GOBP_NEGATIVE_REGULATION_OF_DNA_DAMAGE_RESPONSE_SIGNAL_TRANSDUCTION_BY_P53_CLASS_MEDIATOR	1/201	15/17872	0.156100891100426	0.298876096375207	0.214624223626355	CD44	1
GOBP_NEGATIVE_REGULATION_OF_DNA_DEPENDENT_DNA_REPLICATION	GOBP_NEGATIVE_REGULATION_OF_DNA_DEPENDENT_DNA_REPLICATION	GOBP_NEGATIVE_REGULATION_OF_DNA_DEPENDENT_DNA_REPLICATION	1/201	15/17872	0.156100891100426	0.298876096375207	0.214624223626355	BCL6	1
GOBP_NEGATIVE_REGULATION_OF_KERATINOCYTE_PROLIFERATION	GOBP_NEGATIVE_REGULATION_OF_KERATINOCYTE_PROLIFERATION	GOBP_NEGATIVE_REGULATION_OF_KERATINOCYTE_PROLIFERATION	1/201	15/17872	0.156100891100426	0.298876096375207	0.214624223626355	KLF9	1
GOBP_NEGATIVE_REGULATION_OF_LOW_DENSITY_LIPOPROTEIN_PARTICLE_CLEARANCE	GOBP_NEGATIVE_REGULATION_OF_LOW_DENSITY_LIPOPROTEIN_PARTICLE_CLEARANCE	GOBP_NEGATIVE_REGULATION_OF_LOW_DENSITY_LIPOPROTEIN_PARTICLE_CLEARANCE	1/201	15/17872	0.156100891100426	0.298876096375207	0.214624223626355	LDLR	1
GOBP_NEGATIVE_REGULATION_OF_NEURON_PROJECTION_REGENERATION	GOBP_NEGATIVE_REGULATION_OF_NEURON_PROJECTION_REGENERATION	GOBP_NEGATIVE_REGULATION_OF_NEURON_PROJECTION_REGENERATION	1/201	15/17872	0.156100891100426	0.298876096375207	0.214624223626355	PTEN	1
GOBP_NEGATIVE_REGULATION_OF_VIRAL_TRANSCRIPTION	GOBP_NEGATIVE_REGULATION_OF_VIRAL_TRANSCRIPTION	GOBP_NEGATIVE_REGULATION_OF_VIRAL_TRANSCRIPTION	1/201	15/17872	0.156100891100426	0.298876096375207	0.214624223626355	ZFP36	1
GOBP_ONE_CARBON_COMPOUND_TRANSPORT	GOBP_ONE_CARBON_COMPOUND_TRANSPORT	GOBP_ONE_CARBON_COMPOUND_TRANSPORT	1/201	15/17872	0.156100891100426	0.298876096375207	0.214624223626355	AQP9	1
GOBP_ORGANELLE_INHERITANCE	GOBP_ORGANELLE_INHERITANCE	GOBP_ORGANELLE_INHERITANCE	1/201	15/17872	0.156100891100426	0.298876096375207	0.214624223626355	PLK3	1
GOBP_PARTURITION	GOBP_PARTURITION	GOBP_PARTURITION	1/201	15/17872	0.156100891100426	0.298876096375207	0.214624223626355	MAFF	1
GOBP_POSITIVE_REGULATION_OF_CAMP_MEDIATED_SIGNALING	GOBP_POSITIVE_REGULATION_OF_CAMP_MEDIATED_SIGNALING	GOBP_POSITIVE_REGULATION_OF_CAMP_MEDIATED_SIGNALING	1/201	15/17872	0.156100891100426	0.298876096375207	0.214624223626355	RAPGEF2	1
GOBP_POSITIVE_REGULATION_OF_DNA_DAMAGE_RESPONSE_SIGNAL_TRANSDUCTION_BY_P53_CLASS_MEDIATOR	GOBP_POSITIVE_REGULATION_OF_DNA_DAMAGE_RESPONSE_SIGNAL_TRANSDUCTION_BY_P53_CLASS_MEDIATOR	GOBP_POSITIVE_REGULATION_OF_DNA_DAMAGE_RESPONSE_SIGNAL_TRANSDUCTION_BY_P53_CLASS_MEDIATOR	1/201	15/17872	0.156100891100426	0.298876096375207	0.214624223626355	PMAIP1	1
GOBP_POSITIVE_REGULATION_OF_EXOSOMAL_SECRETION	GOBP_POSITIVE_REGULATION_OF_EXOSOMAL_SECRETION	GOBP_POSITIVE_REGULATION_OF_EXOSOMAL_SECRETION	1/201	15/17872	0.156100891100426	0.298876096375207	0.214624223626355	SDC4	1
GOBP_POSITIVE_REGULATION_OF_MONOCYTE_CHEMOTACTIC_PROTEIN_1_PRODUCTION	GOBP_POSITIVE_REGULATION_OF_MONOCYTE_CHEMOTACTIC_PROTEIN_1_PRODUCTION	GOBP_POSITIVE_REGULATION_OF_MONOCYTE_CHEMOTACTIC_PROTEIN_1_PRODUCTION	1/201	15/17872	0.156100891100426	0.298876096375207	0.214624223626355	IL1B	1
GOBP_POSITIVE_REGULATION_OF_NUCLEAR_TRANSCRIBED_MRNA_CATABOLIC_PROCESS_DEADENYLATION_DEPENDENT_DECAY	GOBP_POSITIVE_REGULATION_OF_NUCLEAR_TRANSCRIBED_MRNA_CATABOLIC_PROCESS_DEADENYLATION_DEPENDENT_DECAY	GOBP_POSITIVE_REGULATION_OF_NUCLEAR_TRANSCRIBED_MRNA_CATABOLIC_PROCESS_DEADENYLATION_DEPENDENT_DECAY	1/201	15/17872	0.156100891100426	0.298876096375207	0.214624223626355	ZFP36	1
GOBP_PTERIDINE_CONTAINING_COMPOUND_BIOSYNTHETIC_PROCESS	GOBP_PTERIDINE_CONTAINING_COMPOUND_BIOSYNTHETIC_PROCESS	GOBP_PTERIDINE_CONTAINING_COMPOUND_BIOSYNTHETIC_PROCESS	1/201	15/17872	0.156100891100426	0.298876096375207	0.214624223626355	GCH1	1
GOBP_REGULATION_OF_ADENYLATE_CYCLASE_ACTIVATING_G_PROTEIN_COUPLED_RECEPTOR_SIGNALING_PATHWAY	GOBP_REGULATION_OF_ADENYLATE_CYCLASE_ACTIVATING_G_PROTEIN_COUPLED_RECEPTOR_SIGNALING_PATHWAY	GOBP_REGULATION_OF_ADENYLATE_CYCLASE_ACTIVATING_G_PROTEIN_COUPLED_RECEPTOR_SIGNALING_PATHWAY	1/201	15/17872	0.156100891100426	0.298876096375207	0.214624223626355	PDE4B	1
GOBP_REGULATION_OF_HEMATOPOIETIC_STEM_CELL_DIFFERENTIATION	GOBP_REGULATION_OF_HEMATOPOIETIC_STEM_CELL_DIFFERENTIATION	GOBP_REGULATION_OF_HEMATOPOIETIC_STEM_CELL_DIFFERENTIATION	1/201	15/17872	0.156100891100426	0.298876096375207	0.214624223626355	NFE2L2	1
GOBP_REGULATION_OF_HISTONE_PHOSPHORYLATION	GOBP_REGULATION_OF_HISTONE_PHOSPHORYLATION	GOBP_REGULATION_OF_HISTONE_PHOSPHORYLATION	1/201	15/17872	0.156100891100426	0.298876096375207	0.214624223626355	IL1B	1
GOBP_REGULATION_OF_NEUTROPHIL_ACTIVATION	GOBP_REGULATION_OF_NEUTROPHIL_ACTIVATION	GOBP_REGULATION_OF_NEUTROPHIL_ACTIVATION	1/201	15/17872	0.156100891100426	0.298876096375207	0.214624223626355	TNF	1
GOBP_REGULATION_OF_PLASMINOGEN_ACTIVATION	GOBP_REGULATION_OF_PLASMINOGEN_ACTIVATION	GOBP_REGULATION_OF_PLASMINOGEN_ACTIVATION	1/201	15/17872	0.156100891100426	0.298876096375207	0.214624223626355	THBS1	1
GOBP_RESPIRATORY_BURST_INVOLVED_IN_DEFENSE_RESPONSE	GOBP_RESPIRATORY_BURST_INVOLVED_IN_DEFENSE_RESPONSE	GOBP_RESPIRATORY_BURST_INVOLVED_IN_DEFENSE_RESPONSE	1/201	15/17872	0.156100891100426	0.298876096375207	0.214624223626355	HCK	1
GOBP_SKELETAL_MUSCLE_CELL_PROLIFERATION	GOBP_SKELETAL_MUSCLE_CELL_PROLIFERATION	GOBP_SKELETAL_MUSCLE_CELL_PROLIFERATION	1/201	15/17872	0.156100891100426	0.298876096375207	0.214624223626355	CFLAR	1
GOBP_SODIUM_ION_EXPORT_ACROSS_PLASMA_MEMBRANE	GOBP_SODIUM_ION_EXPORT_ACROSS_PLASMA_MEMBRANE	GOBP_SODIUM_ION_EXPORT_ACROSS_PLASMA_MEMBRANE	1/201	15/17872	0.156100891100426	0.298876096375207	0.214624223626355	ATP1A1	1
GOBP_T_CELL_TOLERANCE_INDUCTION	GOBP_T_CELL_TOLERANCE_INDUCTION	GOBP_T_CELL_TOLERANCE_INDUCTION	1/201	15/17872	0.156100891100426	0.298876096375207	0.214624223626355	IL2RA	1
GOBP_TRANSFORMING_GROWTH_FACTOR_BETA1_PRODUCTION	GOBP_TRANSFORMING_GROWTH_FACTOR_BETA1_PRODUCTION	GOBP_TRANSFORMING_GROWTH_FACTOR_BETA1_PRODUCTION	1/201	15/17872	0.156100891100426	0.298876096375207	0.214624223626355	THBS1	1
GOBP_VASCULAR_ASSOCIATED_SMOOTH_MUSCLE_CELL_APOPTOTIC_PROCESS	GOBP_VASCULAR_ASSOCIATED_SMOOTH_MUSCLE_CELL_APOPTOTIC_PROCESS	GOBP_VASCULAR_ASSOCIATED_SMOOTH_MUSCLE_CELL_APOPTOTIC_PROCESS	1/201	15/17872	0.156100891100426	0.298876096375207	0.214624223626355	SOD2	1
GOBP_NEGATIVE_REGULATION_OF_REPRODUCTIVE_PROCESS	GOBP_NEGATIVE_REGULATION_OF_REPRODUCTIVE_PROCESS	GOBP_NEGATIVE_REGULATION_OF_REPRODUCTIVE_PROCESS	2/201	63/17872	0.158008876856945	0.301754468415025	0.216691195096626	IL1A/DUSP1	2
GOBP_NUCLEAR_TRANSCRIBED_MRNA_CATABOLIC_PROCESS_DEADENYLATION_DEPENDENT_DECAY	GOBP_NUCLEAR_TRANSCRIBED_MRNA_CATABOLIC_PROCESS_DEADENYLATION_DEPENDENT_DECAY	GOBP_NUCLEAR_TRANSCRIBED_MRNA_CATABOLIC_PROCESS_DEADENYLATION_DEPENDENT_DECAY	2/201	63/17872	0.158008876856945	0.301754468415025	0.216691195096626	ZFP36/BTG2	2
GOBP_POLYOL_BIOSYNTHETIC_PROCESS	GOBP_POLYOL_BIOSYNTHETIC_PROCESS	GOBP_POLYOL_BIOSYNTHETIC_PROCESS	2/201	63/17872	0.158008876856945	0.301754468415025	0.216691195096626	GCH1/PLEK	2
GOBP_REGULATION_OF_STEM_CELL_DIFFERENTIATION	GOBP_REGULATION_OF_STEM_CELL_DIFFERENTIATION	GOBP_REGULATION_OF_STEM_CELL_DIFFERENTIATION	2/201	63/17872	0.158008876856945	0.301754468415025	0.216691195096626	NFE2L2/STAT3	2
GOBP_GLYCEROLIPID_METABOLIC_PROCESS	GOBP_GLYCEROLIPID_METABOLIC_PROCESS	GOBP_GLYCEROLIPID_METABOLIC_PROCESS	7/201	396/17872	0.159737514241751	0.30486052782031	0.218921669853496	ACSL1/PTEN/LDLR/GK/PLEK/SLC44A2/PIGL	7
GOBP_NEGATIVE_REGULATION_OF_CELL_PROJECTION_ORGANIZATION	GOBP_NEGATIVE_REGULATION_OF_CELL_PROJECTION_ORGANIZATION	GOBP_NEGATIVE_REGULATION_OF_CELL_PROJECTION_ORGANIZATION	4/201	187/17872	0.160073730126648	0.30530686506892	0.219242186571361	DENND5A/PTEN/RAPGEF2/LIMK2	4
GOBP_NEGATIVE_REGULATION_OF_CELL_CYCLE_PHASE_TRANSITION	GOBP_NEGATIVE_REGULATION_OF_CELL_CYCLE_PHASE_TRANSITION	GOBP_NEGATIVE_REGULATION_OF_CELL_CYCLE_PHASE_TRANSITION	5/201	255/17872	0.160695355412953	0.305739286178139	0.219552710049055	GPR132/PTEN/DUSP1/PLK3/TEX14	5
GOBP_FORMATION_OF_PRIMARY_GERM_LAYER	GOBP_FORMATION_OF_PRIMARY_GERM_LAYER	GOBP_FORMATION_OF_PRIMARY_GERM_LAYER	3/201	123/17872	0.161124436714159	0.305739286178139	0.219552710049055	ETS2/DUSP1/KDM6B	3
GOBP_NEGATIVE_REGULATION_OF_DNA_METABOLIC_PROCESS	GOBP_NEGATIVE_REGULATION_OF_DNA_METABOLIC_PROCESS	GOBP_NEGATIVE_REGULATION_OF_DNA_METABOLIC_PROCESS	3/201	123/17872	0.161124436714159	0.305739286178139	0.219552710049055	HNRNPC/BCL6/HELB	3
GOBP_REGULATION_OF_GLUCOSE_METABOLIC_PROCESS	GOBP_REGULATION_OF_GLUCOSE_METABOLIC_PROCESS	GOBP_REGULATION_OF_GLUCOSE_METABOLIC_PROCESS	3/201	123/17872	0.161124436714159	0.305739286178139	0.219552710049055	PMAIP1/INSR/PTPN2	3
GOBP_REGULATION_OF_EMBRYONIC_DEVELOPMENT	GOBP_REGULATION_OF_EMBRYONIC_DEVELOPMENT	GOBP_REGULATION_OF_EMBRYONIC_DEVELOPMENT	2/201	64/17872	0.16196430470451	0.305739286178139	0.219552710049055	INSR/NFE2L2	2
GOBP_REGULATION_OF_RAS_PROTEIN_SIGNAL_TRANSDUCTION	GOBP_REGULATION_OF_RAS_PROTEIN_SIGNAL_TRANSDUCTION	GOBP_REGULATION_OF_RAS_PROTEIN_SIGNAL_TRANSDUCTION	4/201	188/17872	0.162216880286439	0.305739286178139	0.219552710049055	BCL6/DENND4A/AKAP13/ABL2	4
GOBP_MYOTUBE_DIFFERENTIATION	GOBP_MYOTUBE_DIFFERENTIATION	GOBP_MYOTUBE_DIFFERENTIATION	3/201	124/17872	0.163843051599561	0.305739286178139	0.219552710049055	CFLAR/SCGB3A1/EHD1	3
GOBP_NEGATIVE_REGULATION_OF_PROTEIN_CATABOLIC_PROCESS	GOBP_NEGATIVE_REGULATION_OF_PROTEIN_CATABOLIC_PROCESS	GOBP_NEGATIVE_REGULATION_OF_PROTEIN_CATABOLIC_PROCESS	3/201	124/17872	0.163843051599561	0.305739286178139	0.219552710049055	IRAK3/N4BP1/HIPK2	3
GOBP_REGULATION_OF_PROTEIN_LOCALIZATION_TO_CELL_PERIPHERY	GOBP_REGULATION_OF_PROTEIN_LOCALIZATION_TO_CELL_PERIPHERY	GOBP_REGULATION_OF_PROTEIN_LOCALIZATION_TO_CELL_PERIPHERY	3/201	124/17872	0.163843051599561	0.305739286178139	0.219552710049055	TNF/PRKCE/PRKCH	3
GOBP_ADHESION_OF_SYMBIONT_TO_HOST	GOBP_ADHESION_OF_SYMBIONT_TO_HOST	GOBP_ADHESION_OF_SYMBIONT_TO_HOST	1/201	16/17872	0.165599895462235	0.305739286178139	0.219552710049055	ICAM1	1
GOBP_ANATOMICAL_STRUCTURE_REGRESSION	GOBP_ANATOMICAL_STRUCTURE_REGRESSION	GOBP_ANATOMICAL_STRUCTURE_REGRESSION	1/201	16/17872	0.165599895462235	0.305739286178139	0.219552710049055	FLT1	1
GOBP_AROMATIC_AMINO_ACID_FAMILY_CATABOLIC_PROCESS	GOBP_AROMATIC_AMINO_ACID_FAMILY_CATABOLIC_PROCESS	GOBP_AROMATIC_AMINO_ACID_FAMILY_CATABOLIC_PROCESS	1/201	16/17872	0.165599895462235	0.305739286178139	0.219552710049055	KYNU	1
GOBP_BEHAVIORAL_RESPONSE_TO_PAIN	GOBP_BEHAVIORAL_RESPONSE_TO_PAIN	GOBP_BEHAVIORAL_RESPONSE_TO_PAIN	1/201	16/17872	0.165599895462235	0.305739286178139	0.219552710049055	THBS1	1
GOBP_CELLULAR_ANION_HOMEOSTASIS	GOBP_CELLULAR_ANION_HOMEOSTASIS	GOBP_CELLULAR_ANION_HOMEOSTASIS	1/201	16/17872	0.165599895462235	0.305739286178139	0.219552710049055	TBXAS1	1
GOBP_CELLULAR_COPPER_ION_HOMEOSTASIS	GOBP_CELLULAR_COPPER_ION_HOMEOSTASIS	GOBP_CELLULAR_COPPER_ION_HOMEOSTASIS	1/201	16/17872	0.165599895462235	0.305739286178139	0.219552710049055	MT2A	1
GOBP_CELLULAR_RESPONSE_TO_ESTROGEN_STIMULUS	GOBP_CELLULAR_RESPONSE_TO_ESTROGEN_STIMULUS	GOBP_CELLULAR_RESPONSE_TO_ESTROGEN_STIMULUS	1/201	16/17872	0.165599895462235	0.305739286178139	0.219552710049055	SERPINB9	1
GOBP_CHAPERONE_MEDIATED_AUTOPHAGY	GOBP_CHAPERONE_MEDIATED_AUTOPHAGY	GOBP_CHAPERONE_MEDIATED_AUTOPHAGY	1/201	16/17872	0.165599895462235	0.305739286178139	0.219552710049055	PLK3	1
GOBP_CRISTAE_FORMATION	GOBP_CRISTAE_FORMATION	GOBP_CRISTAE_FORMATION	1/201	16/17872	0.165599895462235	0.305739286178139	0.219552710049055	APOO	1
GOBP_GANGLIOSIDE_BIOSYNTHETIC_PROCESS	GOBP_GANGLIOSIDE_BIOSYNTHETIC_PROCESS	GOBP_GANGLIOSIDE_BIOSYNTHETIC_PROCESS	1/201	16/17872	0.165599895462235	0.305739286178139	0.219552710049055	ST6GALNAC3	1
GOBP_GLIAL_CELL_APOPTOTIC_PROCESS	GOBP_GLIAL_CELL_APOPTOTIC_PROCESS	GOBP_GLIAL_CELL_APOPTOTIC_PROCESS	1/201	16/17872	0.165599895462235	0.305739286178139	0.219552710049055	PRKCH	1
GOBP_LIPOPROTEIN_CATABOLIC_PROCESS	GOBP_LIPOPROTEIN_CATABOLIC_PROCESS	GOBP_LIPOPROTEIN_CATABOLIC_PROCESS	1/201	16/17872	0.165599895462235	0.305739286178139	0.219552710049055	LDLR	1
GOBP_LOCOMOTORY_EXPLORATION_BEHAVIOR	GOBP_LOCOMOTORY_EXPLORATION_BEHAVIOR	GOBP_LOCOMOTORY_EXPLORATION_BEHAVIOR	1/201	16/17872	0.165599895462235	0.305739286178139	0.219552710049055	PRKCE	1
GOBP_MANGANESE_ION_TRANSPORT	GOBP_MANGANESE_ION_TRANSPORT	GOBP_MANGANESE_ION_TRANSPORT	1/201	16/17872	0.165599895462235	0.305739286178139	0.219552710049055	TMEM165	1
GOBP_METANEPHRIC_GLOMERULUS_DEVELOPMENT	GOBP_METANEPHRIC_GLOMERULUS_DEVELOPMENT	GOBP_METANEPHRIC_GLOMERULUS_DEVELOPMENT	1/201	16/17872	0.165599895462235	0.305739286178139	0.219552710049055	EGR1	1
GOBP_MHC_CLASS_II_BIOSYNTHETIC_PROCESS	GOBP_MHC_CLASS_II_BIOSYNTHETIC_PROCESS	GOBP_MHC_CLASS_II_BIOSYNTHETIC_PROCESS	1/201	16/17872	0.165599895462235	0.305739286178139	0.219552710049055	TLR4	1
GOBP_MONOVALENT_INORGANIC_ANION_HOMEOSTASIS	GOBP_MONOVALENT_INORGANIC_ANION_HOMEOSTASIS	GOBP_MONOVALENT_INORGANIC_ANION_HOMEOSTASIS	1/201	16/17872	0.165599895462235	0.305739286178139	0.219552710049055	TBXAS1	1
GOBP_NEGATIVE_REGULATION_OF_HUMORAL_IMMUNE_RESPONSE	GOBP_NEGATIVE_REGULATION_OF_HUMORAL_IMMUNE_RESPONSE	GOBP_NEGATIVE_REGULATION_OF_HUMORAL_IMMUNE_RESPONSE	1/201	16/17872	0.165599895462235	0.305739286178139	0.219552710049055	CD55	1
GOBP_NEGATIVE_REGULATION_OF_MEIOTIC_CELL_CYCLE	GOBP_NEGATIVE_REGULATION_OF_MEIOTIC_CELL_CYCLE	GOBP_NEGATIVE_REGULATION_OF_MEIOTIC_CELL_CYCLE	1/201	16/17872	0.165599895462235	0.305739286178139	0.219552710049055	DUSP1	1
GOBP_NEGATIVE_REGULATION_OF_SODIUM_ION_TRANSMEMBRANE_TRANSPORT	GOBP_NEGATIVE_REGULATION_OF_SODIUM_ION_TRANSMEMBRANE_TRANSPORT	GOBP_NEGATIVE_REGULATION_OF_SODIUM_ION_TRANSMEMBRANE_TRANSPORT	1/201	16/17872	0.165599895462235	0.305739286178139	0.219552710049055	PRKCE	1
GOBP_NEGATIVE_REGULATION_OF_TYROSINE_PHOSPHORYLATION_OF_STAT_PROTEIN	GOBP_NEGATIVE_REGULATION_OF_TYROSINE_PHOSPHORYLATION_OF_STAT_PROTEIN	GOBP_NEGATIVE_REGULATION_OF_TYROSINE_PHOSPHORYLATION_OF_STAT_PROTEIN	1/201	16/17872	0.165599895462235	0.305739286178139	0.219552710049055	PTPN2	1
GOBP_NEUTROPHIL_HOMEOSTASIS	GOBP_NEUTROPHIL_HOMEOSTASIS	GOBP_NEUTROPHIL_HOMEOSTASIS	1/201	16/17872	0.165599895462235	0.305739286178139	0.219552710049055	PDE4B	1
GOBP_PEPTIDE_ANTIGEN_ASSEMBLY_WITH_MHC_CLASS_II_PROTEIN_COMPLEX	GOBP_PEPTIDE_ANTIGEN_ASSEMBLY_WITH_MHC_CLASS_II_PROTEIN_COMPLEX	GOBP_PEPTIDE_ANTIGEN_ASSEMBLY_WITH_MHC_CLASS_II_PROTEIN_COMPLEX	1/201	16/17872	0.165599895462235	0.305739286178139	0.219552710049055	HLA-DQA2	1
GOBP_PEPTIDYL_THREONINE_DEPHOSPHORYLATION	GOBP_PEPTIDYL_THREONINE_DEPHOSPHORYLATION	GOBP_PEPTIDYL_THREONINE_DEPHOSPHORYLATION	1/201	16/17872	0.165599895462235	0.305739286178139	0.219552710049055	DUSP1	1
GOBP_PHOSPHATIDYLCHOLINE_CATABOLIC_PROCESS	GOBP_PHOSPHATIDYLCHOLINE_CATABOLIC_PROCESS	GOBP_PHOSPHATIDYLCHOLINE_CATABOLIC_PROCESS	1/201	16/17872	0.165599895462235	0.305739286178139	0.219552710049055	LDLR	1
GOBP_POSITIVE_REGULATION_OF_ACTIN_NUCLEATION	GOBP_POSITIVE_REGULATION_OF_ACTIN_NUCLEATION	GOBP_POSITIVE_REGULATION_OF_ACTIN_NUCLEATION	1/201	16/17872	0.165599895462235	0.305739286178139	0.219552710049055	FMN1	1
GOBP_POSITIVE_REGULATION_OF_BROWN_FAT_CELL_DIFFERENTIATION	GOBP_POSITIVE_REGULATION_OF_BROWN_FAT_CELL_DIFFERENTIATION	GOBP_POSITIVE_REGULATION_OF_BROWN_FAT_CELL_DIFFERENTIATION	1/201	16/17872	0.165599895462235	0.305739286178139	0.219552710049055	PTGS2	1
GOBP_POSITIVE_REGULATION_OF_CALCINEURIN_MEDIATED_SIGNALING	GOBP_POSITIVE_REGULATION_OF_CALCINEURIN_MEDIATED_SIGNALING	GOBP_POSITIVE_REGULATION_OF_CALCINEURIN_MEDIATED_SIGNALING	1/201	16/17872	0.165599895462235	0.305739286178139	0.219552710049055	TNF	1
GOBP_POSITIVE_REGULATION_OF_GLYCOGEN_METABOLIC_PROCESS	GOBP_POSITIVE_REGULATION_OF_GLYCOGEN_METABOLIC_PROCESS	GOBP_POSITIVE_REGULATION_OF_GLYCOGEN_METABOLIC_PROCESS	1/201	16/17872	0.165599895462235	0.305739286178139	0.219552710049055	INSR	1
GOBP_POSITIVE_REGULATION_OF_MEIOTIC_NUCLEAR_DIVISION	GOBP_POSITIVE_REGULATION_OF_MEIOTIC_NUCLEAR_DIVISION	GOBP_POSITIVE_REGULATION_OF_MEIOTIC_NUCLEAR_DIVISION	1/201	16/17872	0.165599895462235	0.305739286178139	0.219552710049055	OOEP	1
GOBP_POSITIVE_REGULATION_OF_NEURON_MIGRATION	GOBP_POSITIVE_REGULATION_OF_NEURON_MIGRATION	GOBP_POSITIVE_REGULATION_OF_NEURON_MIGRATION	1/201	16/17872	0.165599895462235	0.305739286178139	0.219552710049055	RAPGEF2	1
GOBP_POSITIVE_REGULATION_OF_SMOOTH_MUSCLE_CELL_APOPTOTIC_PROCESS	GOBP_POSITIVE_REGULATION_OF_SMOOTH_MUSCLE_CELL_APOPTOTIC_PROCESS	GOBP_POSITIVE_REGULATION_OF_SMOOTH_MUSCLE_CELL_APOPTOTIC_PROCESS	1/201	16/17872	0.165599895462235	0.305739286178139	0.219552710049055	SOD2	1
GOBP_REGULATION_OF_AMYLOID_FIBRIL_FORMATION	GOBP_REGULATION_OF_AMYLOID_FIBRIL_FORMATION	GOBP_REGULATION_OF_AMYLOID_FIBRIL_FORMATION	1/201	16/17872	0.165599895462235	0.305739286178139	0.219552710049055	LDLR	1
GOBP_REGULATION_OF_INOSITOL_PHOSPHATE_BIOSYNTHETIC_PROCESS	GOBP_REGULATION_OF_INOSITOL_PHOSPHATE_BIOSYNTHETIC_PROCESS	GOBP_REGULATION_OF_INOSITOL_PHOSPHATE_BIOSYNTHETIC_PROCESS	1/201	16/17872	0.165599895462235	0.305739286178139	0.219552710049055	PLEK	1
GOBP_REGULATION_OF_LYSOSOMAL_LUMEN_PH	GOBP_REGULATION_OF_LYSOSOMAL_LUMEN_PH	GOBP_REGULATION_OF_LYSOSOMAL_LUMEN_PH	1/201	16/17872	0.165599895462235	0.305739286178139	0.219552710049055	TMEM165	1
GOBP_REGULATION_OF_METALLOENDOPEPTIDASE_ACTIVITY	GOBP_REGULATION_OF_METALLOENDOPEPTIDASE_ACTIVITY	GOBP_REGULATION_OF_METALLOENDOPEPTIDASE_ACTIVITY	1/201	16/17872	0.165599895462235	0.305739286178139	0.219552710049055	STAT3	1
GOBP_REGULATION_OF_RESPONSE_TO_INTERFERON_GAMMA	GOBP_REGULATION_OF_RESPONSE_TO_INTERFERON_GAMMA	GOBP_REGULATION_OF_RESPONSE_TO_INTERFERON_GAMMA	1/201	16/17872	0.165599895462235	0.305739286178139	0.219552710049055	PTPN2	1
GOBP_REGULATION_OF_SKELETAL_MUSCLE_CONTRACTION	GOBP_REGULATION_OF_SKELETAL_MUSCLE_CONTRACTION	GOBP_REGULATION_OF_SKELETAL_MUSCLE_CONTRACTION	1/201	16/17872	0.165599895462235	0.305739286178139	0.219552710049055	KCNJ2	1
GOBP_RESPONSE_TO_LIGHT_INTENSITY	GOBP_RESPONSE_TO_LIGHT_INTENSITY	GOBP_RESPONSE_TO_LIGHT_INTENSITY	1/201	16/17872	0.165599895462235	0.305739286178139	0.219552710049055	MT-ND3	1
GOBP_SEMAPHORIN_PLEXIN_SIGNALING_PATHWAY_INVOLVED_IN_NEURON_PROJECTION_GUIDANCE	GOBP_SEMAPHORIN_PLEXIN_SIGNALING_PATHWAY_INVOLVED_IN_NEURON_PROJECTION_GUIDANCE	GOBP_SEMAPHORIN_PLEXIN_SIGNALING_PATHWAY_INVOLVED_IN_NEURON_PROJECTION_GUIDANCE	1/201	16/17872	0.165599895462235	0.305739286178139	0.219552710049055	ECE1	1
GOBP_SNRNA_TRANSCRIPTION_BY_RNA_POLYMERASE_II	GOBP_SNRNA_TRANSCRIPTION_BY_RNA_POLYMERASE_II	GOBP_SNRNA_TRANSCRIPTION_BY_RNA_POLYMERASE_II	1/201	16/17872	0.165599895462235	0.305739286178139	0.219552710049055	ELL2	1
GOBP_ANIMAL_ORGAN_REGENERATION	GOBP_ANIMAL_ORGAN_REGENERATION	GOBP_ANIMAL_ORGAN_REGENERATION	2/201	65/17872	0.165937614590147	0.305739286178139	0.219552710049055	TNF/ADM	2
GOBP_METAPHASE_ANAPHASE_TRANSITION_OF_CELL_CYCLE	GOBP_METAPHASE_ANAPHASE_TRANSITION_OF_CELL_CYCLE	GOBP_METAPHASE_ANAPHASE_TRANSITION_OF_CELL_CYCLE	2/201	65/17872	0.165937614590147	0.305739286178139	0.219552710049055	DUSP1/TEX14	2
GOBP_NEGATIVE_REGULATION_OF_PROTEOLYSIS_INVOLVED_IN_CELLULAR_PROTEIN_CATABOLIC_PROCESS	GOBP_NEGATIVE_REGULATION_OF_PROTEOLYSIS_INVOLVED_IN_CELLULAR_PROTEIN_CATABOLIC_PROCESS	GOBP_NEGATIVE_REGULATION_OF_PROTEOLYSIS_INVOLVED_IN_CELLULAR_PROTEIN_CATABOLIC_PROCESS	2/201	65/17872	0.165937614590147	0.305739286178139	0.219552710049055	N4BP1/HIPK2	2
GOBP_REGULATION_OF_SMOOTH_MUSCLE_CONTRACTION	GOBP_REGULATION_OF_SMOOTH_MUSCLE_CONTRACTION	GOBP_REGULATION_OF_SMOOTH_MUSCLE_CONTRACTION	2/201	65/17872	0.165937614590147	0.305739286178139	0.219552710049055	PTGS2/KCNMA1	2
GOBP_RESPONSE_TO_ACTIVITY	GOBP_RESPONSE_TO_ACTIVITY	GOBP_RESPONSE_TO_ACTIVITY	2/201	65/17872	0.165937614590147	0.305739286178139	0.219552710049055	SOD2/TNF	2
GOBP_GASTRULATION	GOBP_GASTRULATION	GOBP_GASTRULATION	4/201	190/17872	0.166534520640286	0.30664967596912	0.220206464914219	ETS2/IL1RN/DUSP1/KDM6B	4
GOBP_AMYLOID_BETA_METABOLIC_PROCESS	GOBP_AMYLOID_BETA_METABOLIC_PROCESS	GOBP_AMYLOID_BETA_METABOLIC_PROCESS	2/201	66/17872	0.16992791039228	0.311743515805764	0.223864373437101	TNF/GSAP	2
GOBP_CELLULAR_COMPONENT_MAINTENANCE	GOBP_CELLULAR_COMPONENT_MAINTENANCE	GOBP_CELLULAR_COMPONENT_MAINTENANCE	2/201	66/17872	0.16992791039228	0.311743515805764	0.223864373437101	INSR/MTSS1	2
GOBP_LONG_CHAIN_FATTY_ACID_TRANSPORT	GOBP_LONG_CHAIN_FATTY_ACID_TRANSPORT	GOBP_LONG_CHAIN_FATTY_ACID_TRANSPORT	2/201	66/17872	0.16992791039228	0.311743515805764	0.223864373437101	ACSL1/THBS1	2
GOBP_NEGATIVE_REGULATION_OF_MRNA_CATABOLIC_PROCESS	GOBP_NEGATIVE_REGULATION_OF_MRNA_CATABOLIC_PROCESS	GOBP_NEGATIVE_REGULATION_OF_MRNA_CATABOLIC_PROCESS	2/201	66/17872	0.16992791039228	0.311743515805764	0.223864373437101	HNRNPC/ZFP36	2
GOBP_REGULATION_OF_ANTIGEN_RECEPTOR_MEDIATED_SIGNALING_PATHWAY	GOBP_REGULATION_OF_ANTIGEN_RECEPTOR_MEDIATED_SIGNALING_PATHWAY	GOBP_REGULATION_OF_ANTIGEN_RECEPTOR_MEDIATED_SIGNALING_PATHWAY	2/201	66/17872	0.16992791039228	0.311743515805764	0.223864373437101	PTPN2/PRKCH	2
GOBP_RNA_STABILIZATION	GOBP_RNA_STABILIZATION	GOBP_RNA_STABILIZATION	2/201	66/17872	0.16992791039228	0.311743515805764	0.223864373437101	HNRNPC/ZFP36	2
GOBP_REGULATION_OF_INTRACELLULAR_TRANSPORT	GOBP_REGULATION_OF_INTRACELLULAR_TRANSPORT	GOBP_REGULATION_OF_INTRACELLULAR_TRANSPORT	6/201	333/17872	0.173635447994672	0.314081010786274	0.225542938740606	IL1B/PTPN1/UBAC2/EHD1/PLK3/PTGS2	6
GOBP_CERAMIDE_BIOSYNTHETIC_PROCESS	GOBP_CERAMIDE_BIOSYNTHETIC_PROCESS	GOBP_CERAMIDE_BIOSYNTHETIC_PROCESS	2/201	67/17872	0.173934313696628	0.314081010786274	0.225542938740606	ST6GALNAC3/SGMS2	2
GOBP_MODULATION_BY_HOST_OF_SYMBIONT_PROCESS	GOBP_MODULATION_BY_HOST_OF_SYMBIONT_PROCESS	GOBP_MODULATION_BY_HOST_OF_SYMBIONT_PROCESS	2/201	67/17872	0.173934313696628	0.314081010786274	0.225542938740606	CCL4/CCL3	2
GOBP_PROTEIN_K48_LINKED_UBIQUITINATION	GOBP_PROTEIN_K48_LINKED_UBIQUITINATION	GOBP_PROTEIN_K48_LINKED_UBIQUITINATION	2/201	67/17872	0.173934313696628	0.314081010786274	0.225542938740606	TNFAIP3/PELI1	2
GOBP_STRIATED_MUSCLE_CELL_DEVELOPMENT	GOBP_STRIATED_MUSCLE_CELL_DEVELOPMENT	GOBP_STRIATED_MUSCLE_CELL_DEVELOPMENT	2/201	67/17872	0.173934313696628	0.314081010786274	0.225542938740606	CFLAR/AKAP13	2
GOBP_NEGATIVE_REGULATION_OF_ESTABLISHMENT_OF_PROTEIN_LOCALIZATION	GOBP_NEGATIVE_REGULATION_OF_ESTABLISHMENT_OF_PROTEIN_LOCALIZATION	GOBP_NEGATIVE_REGULATION_OF_ESTABLISHMENT_OF_PROTEIN_LOCALIZATION	3/201	128/17872	0.174851999984418	0.314081010786274	0.225542938740606	IL1B/UBAC2/KLF7	3
GOBP_POSITIVE_REGULATION_OF_PROTEIN_SECRETION	GOBP_POSITIVE_REGULATION_OF_PROTEIN_SECRETION	GOBP_POSITIVE_REGULATION_OF_PROTEIN_SECRETION	3/201	128/17872	0.174851999984418	0.314081010786274	0.225542938740606	IL1A/PRKCE/TLR4	3
GOBP_3_UTR_MEDIATED_MRNA_DESTABILIZATION	GOBP_3_UTR_MEDIATED_MRNA_DESTABILIZATION	GOBP_3_UTR_MEDIATED_MRNA_DESTABILIZATION	1/201	17/17872	0.174992504165869	0.314081010786274	0.225542938740606	ZFP36	1
GOBP_CALCIUM_ION_TRANSMEMBRANE_TRANSPORT_VIA_HIGH_VOLTAGE_GATED_CALCIUM_CHANNEL	GOBP_CALCIUM_ION_TRANSMEMBRANE_TRANSPORT_VIA_HIGH_VOLTAGE_GATED_CALCIUM_CHANNEL	GOBP_CALCIUM_ION_TRANSMEMBRANE_TRANSPORT_VIA_HIGH_VOLTAGE_GATED_CALCIUM_CHANNEL	1/201	17/17872	0.174992504165869	0.314081010786274	0.225542938740606	SESTD1	1
GOBP_CELL_MIGRATION_IN_HINDBRAIN	GOBP_CELL_MIGRATION_IN_HINDBRAIN	GOBP_CELL_MIGRATION_IN_HINDBRAIN	1/201	17/17872	0.174992504165869	0.314081010786274	0.225542938740606	RBFOX2	1
GOBP_DENDRITIC_CELL_CYTOKINE_PRODUCTION	GOBP_DENDRITIC_CELL_CYTOKINE_PRODUCTION	GOBP_DENDRITIC_CELL_CYTOKINE_PRODUCTION	1/201	17/17872	0.174992504165869	0.314081010786274	0.225542938740606	TLR4	1
GOBP_GAP_JUNCTION_ASSEMBLY	GOBP_GAP_JUNCTION_ASSEMBLY	GOBP_GAP_JUNCTION_ASSEMBLY	1/201	17/17872	0.174992504165869	0.314081010786274	0.225542938740606	IL1B	1
GOBP_GLYCOSYLCERAMIDE_METABOLIC_PROCESS	GOBP_GLYCOSYLCERAMIDE_METABOLIC_PROCESS	GOBP_GLYCOSYLCERAMIDE_METABOLIC_PROCESS	1/201	17/17872	0.174992504165869	0.314081010786274	0.225542938740606	ST6GALNAC3	1
GOBP_GRANULOCYTE_MACROPHAGE_COLONY_STIMULATING_FACTOR_PRODUCTION	GOBP_GRANULOCYTE_MACROPHAGE_COLONY_STIMULATING_FACTOR_PRODUCTION	GOBP_GRANULOCYTE_MACROPHAGE_COLONY_STIMULATING_FACTOR_PRODUCTION	1/201	17/17872	0.174992504165869	0.314081010786274	0.225542938740606	IL1B	1
GOBP_IMMUNOLOGICAL_MEMORY_PROCESS	GOBP_IMMUNOLOGICAL_MEMORY_PROCESS	GOBP_IMMUNOLOGICAL_MEMORY_PROCESS	1/201	17/17872	0.174992504165869	0.314081010786274	0.225542938740606	BCL6	1
GOBP_LAMELLIPODIUM_MORPHOGENESIS	GOBP_LAMELLIPODIUM_MORPHOGENESIS	GOBP_LAMELLIPODIUM_MORPHOGENESIS	1/201	17/17872	0.174992504165869	0.314081010786274	0.225542938740606	CD44	1
GOBP_NEGATIVE_REGULATION_OF_CILIUM_ASSEMBLY	GOBP_NEGATIVE_REGULATION_OF_CILIUM_ASSEMBLY	GOBP_NEGATIVE_REGULATION_OF_CILIUM_ASSEMBLY	1/201	17/17872	0.174992504165869	0.314081010786274	0.225542938740606	LIMK2	1
GOBP_NEGATIVE_REGULATION_OF_GLUCOSE_IMPORT	GOBP_NEGATIVE_REGULATION_OF_GLUCOSE_IMPORT	GOBP_NEGATIVE_REGULATION_OF_GLUCOSE_IMPORT	1/201	17/17872	0.174992504165869	0.314081010786274	0.225542938740606	TNF	1
GOBP_NEGATIVE_REGULATION_OF_T_HELPER_CELL_DIFFERENTIATION	GOBP_NEGATIVE_REGULATION_OF_T_HELPER_CELL_DIFFERENTIATION	GOBP_NEGATIVE_REGULATION_OF_T_HELPER_CELL_DIFFERENTIATION	1/201	17/17872	0.174992504165869	0.314081010786274	0.225542938740606	BCL6	1
GOBP_NEUROMUSCULAR_PROCESS_CONTROLLING_POSTURE	GOBP_NEUROMUSCULAR_PROCESS_CONTROLLING_POSTURE	GOBP_NEUROMUSCULAR_PROCESS_CONTROLLING_POSTURE	1/201	17/17872	0.174992504165869	0.314081010786274	0.225542938740606	GCH1	1
GOBP_NUCLEAR_BODY_ORGANIZATION	GOBP_NUCLEAR_BODY_ORGANIZATION	GOBP_NUCLEAR_BODY_ORGANIZATION	1/201	17/17872	0.174992504165869	0.314081010786274	0.225542938740606	HIPK2	1
GOBP_NUCLEOSOME_POSITIONING	GOBP_NUCLEOSOME_POSITIONING	GOBP_NUCLEOSOME_POSITIONING	1/201	17/17872	0.174992504165869	0.314081010786274	0.225542938740606	BAZ1A	1
GOBP_PHENOTYPIC_SWITCHING	GOBP_PHENOTYPIC_SWITCHING	GOBP_PHENOTYPIC_SWITCHING	1/201	17/17872	0.174992504165869	0.314081010786274	0.225542938740606	SOD2	1
GOBP_POSITIVE_REGULATION_OF_PROTEIN_EXPORT_FROM_NUCLEUS	GOBP_POSITIVE_REGULATION_OF_PROTEIN_EXPORT_FROM_NUCLEUS	GOBP_POSITIVE_REGULATION_OF_PROTEIN_EXPORT_FROM_NUCLEUS	1/201	17/17872	0.174992504165869	0.314081010786274	0.225542938740606	IL1B	1
GOBP_POSITIVE_REGULATION_OF_TYPE_2_IMMUNE_RESPONSE	GOBP_POSITIVE_REGULATION_OF_TYPE_2_IMMUNE_RESPONSE	GOBP_POSITIVE_REGULATION_OF_TYPE_2_IMMUNE_RESPONSE	1/201	17/17872	0.174992504165869	0.314081010786274	0.225542938740606	NLRP3	1
GOBP_POSITIVE_REGULATION_OF_VASCULAR_ENDOTHELIAL_GROWTH_FACTOR_RECEPTOR_SIGNALING_PATHWAY	GOBP_POSITIVE_REGULATION_OF_VASCULAR_ENDOTHELIAL_GROWTH_FACTOR_RECEPTOR_SIGNALING_PATHWAY	GOBP_POSITIVE_REGULATION_OF_VASCULAR_ENDOTHELIAL_GROWTH_FACTOR_RECEPTOR_SIGNALING_PATHWAY	1/201	17/17872	0.174992504165869	0.314081010786274	0.225542938740606	IL1B	1
GOBP_POST_ANAL_TAIL_MORPHOGENESIS	GOBP_POST_ANAL_TAIL_MORPHOGENESIS	GOBP_POST_ANAL_TAIL_MORPHOGENESIS	1/201	17/17872	0.174992504165869	0.314081010786274	0.225542938740606	CHST11	1
GOBP_PROTEIN_TRIMERIZATION	GOBP_PROTEIN_TRIMERIZATION	GOBP_PROTEIN_TRIMERIZATION	1/201	17/17872	0.174992504165869	0.314081010786274	0.225542938740606	SLC1A2	1
GOBP_REGULATION_OF_INTEGRIN_ACTIVATION	GOBP_REGULATION_OF_INTEGRIN_ACTIVATION	GOBP_REGULATION_OF_INTEGRIN_ACTIVATION	1/201	17/17872	0.174992504165869	0.314081010786274	0.225542938740606	PLEK	1
GOBP_REGULATION_OF_INTRINSIC_APOPTOTIC_SIGNALING_PATHWAY_IN_RESPONSE_TO_DNA_DAMAGE_BY_P53_CLASS_MEDIATOR	GOBP_REGULATION_OF_INTRINSIC_APOPTOTIC_SIGNALING_PATHWAY_IN_RESPONSE_TO_DNA_DAMAGE_BY_P53_CLASS_MEDIATOR	GOBP_REGULATION_OF_INTRINSIC_APOPTOTIC_SIGNALING_PATHWAY_IN_RESPONSE_TO_DNA_DAMAGE_BY_P53_CLASS_MEDIATOR	1/201	17/17872	0.174992504165869	0.314081010786274	0.225542938740606	CD44	1
GOBP_REGULATION_OF_MITOTIC_CELL_CYCLE_SPINDLE_ASSEMBLY_CHECKPOINT	GOBP_REGULATION_OF_MITOTIC_CELL_CYCLE_SPINDLE_ASSEMBLY_CHECKPOINT	GOBP_REGULATION_OF_MITOTIC_CELL_CYCLE_SPINDLE_ASSEMBLY_CHECKPOINT	1/201	17/17872	0.174992504165869	0.314081010786274	0.225542938740606	DUSP1	1
GOBP_REGULATION_OF_POSTSYNAPTIC_NEUROTRANSMITTER_RECEPTOR_ACTIVITY	GOBP_REGULATION_OF_POSTSYNAPTIC_NEUROTRANSMITTER_RECEPTOR_ACTIVITY	GOBP_REGULATION_OF_POSTSYNAPTIC_NEUROTRANSMITTER_RECEPTOR_ACTIVITY	1/201	17/17872	0.174992504165869	0.314081010786274	0.225542938740606	DLGAP1	1
GOBP_RESPONSE_TO_VITAMIN_A	GOBP_RESPONSE_TO_VITAMIN_A	GOBP_RESPONSE_TO_VITAMIN_A	1/201	17/17872	0.174992504165869	0.314081010786274	0.225542938740606	ALDH1A2	1
GOBP_T_HELPER_CELL_LINEAGE_COMMITMENT	GOBP_T_HELPER_CELL_LINEAGE_COMMITMENT	GOBP_T_HELPER_CELL_LINEAGE_COMMITMENT	1/201	17/17872	0.174992504165869	0.314081010786274	0.225542938740606	STAT3	1
GOBP_TERPENOID_BIOSYNTHETIC_PROCESS	GOBP_TERPENOID_BIOSYNTHETIC_PROCESS	GOBP_TERPENOID_BIOSYNTHETIC_PROCESS	1/201	17/17872	0.174992504165869	0.314081010786274	0.225542938740606	ALDH1A2	1
GOBP_TOXIN_METABOLIC_PROCESS	GOBP_TOXIN_METABOLIC_PROCESS	GOBP_TOXIN_METABOLIC_PROCESS	1/201	17/17872	0.174992504165869	0.314081010786274	0.225542938740606	NFE2L2	1
GOBP_MONOSACCHARIDE_METABOLIC_PROCESS	GOBP_MONOSACCHARIDE_METABOLIC_PROCESS	GOBP_MONOSACCHARIDE_METABOLIC_PROCESS	5/201	263/17872	0.175424212364035	0.314666521636751	0.225963396626776	PFKFB3/PMAIP1/INSR/TNF/PTPN2	5
GOBP_AMYLOID_PRECURSOR_PROTEIN_CATABOLIC_PROCESS	GOBP_AMYLOID_PRECURSOR_PROTEIN_CATABOLIC_PROCESS	GOBP_AMYLOID_PRECURSOR_PROTEIN_CATABOLIC_PROCESS	2/201	68/17872	0.177955963514618	0.318060299079752	0.228400482956859	TNF/GSAP	2
GOBP_MAMMARY_GLAND_EPITHELIUM_DEVELOPMENT	GOBP_MAMMARY_GLAND_EPITHELIUM_DEVELOPMENT	GOBP_MAMMARY_GLAND_EPITHELIUM_DEVELOPMENT	2/201	68/17872	0.177955963514618	0.318060299079752	0.228400482956859	AREG/CSMD1	2
GOBP_NEGATIVE_REGULATION_OF_CALCIUM_ION_TRANSPORT	GOBP_NEGATIVE_REGULATION_OF_CALCIUM_ION_TRANSPORT	GOBP_NEGATIVE_REGULATION_OF_CALCIUM_ION_TRANSPORT	2/201	68/17872	0.177955963514618	0.318060299079752	0.228400482956859	SESTD1/PTGS2	2
GOBP_NEGATIVE_REGULATION_OF_PROTEIN_SECRETION	GOBP_NEGATIVE_REGULATION_OF_PROTEIN_SECRETION	GOBP_NEGATIVE_REGULATION_OF_PROTEIN_SECRETION	2/201	68/17872	0.177955963514618	0.318060299079752	0.228400482956859	IL1B/KLF7	2
GOBP_REGULATION_OF_PHOSPHOLIPASE_ACTIVITY	GOBP_REGULATION_OF_PHOSPHOLIPASE_ACTIVITY	GOBP_REGULATION_OF_PHOSPHOLIPASE_ACTIVITY	2/201	68/17872	0.177955963514618	0.318060299079752	0.228400482956859	FLT1/ABL2	2
GOBP_REGULATION_OF_PROTEIN_MATURATION	GOBP_REGULATION_OF_PROTEIN_MATURATION	GOBP_REGULATION_OF_PROTEIN_MATURATION	2/201	68/17872	0.177955963514618	0.318060299079752	0.228400482956859	IL1R2/THBS1	2
GOBP_RESPONSE_TO_STARVATION	GOBP_RESPONSE_TO_STARVATION	GOBP_RESPONSE_TO_STARVATION	4/201	196/17872	0.179728337302979	0.321035706691489	0.230537136093011	PMAIP1/ZFP36/ADM/NFE2L2	4
GOBP_LEUKOCYTE_MEDIATED_CYTOTOXICITY	GOBP_LEUKOCYTE_MEDIATED_CYTOTOXICITY	GOBP_LEUKOCYTE_MEDIATED_CYTOTOXICITY	3/201	130/17872	0.180433094591511	0.321909043759854	0.231164283237046	SERPINB9/RNF19B/ICAM1	3
GOBP_MITOTIC_CELL_CYCLE_CHECKPOINT_SIGNALING	GOBP_MITOTIC_CELL_CYCLE_CHECKPOINT_SIGNALING	GOBP_MITOTIC_CELL_CYCLE_CHECKPOINT_SIGNALING	3/201	130/17872	0.180433094591511	0.321909043759854	0.231164283237046	DUSP1/PLK3/TEX14	3
GOBP_MEIOTIC_CELL_CYCLE	GOBP_MEIOTIC_CELL_CYCLE	GOBP_MEIOTIC_CELL_CYCLE	5/201	266/17872	0.181077400722729	0.322408768756052	0.23152313792846	OOEP/EREG/INSR/DUSP1/TEX14	5
GOBP_POSITIVE_REGULATION_OF_INTRACELLULAR_TRANSPORT	GOBP_POSITIVE_REGULATION_OF_INTRACELLULAR_TRANSPORT	GOBP_POSITIVE_REGULATION_OF_INTRACELLULAR_TRANSPORT	4/201	197/17872	0.181960994289541	0.322408768756052	0.23152313792846	IL1B/EHD1/PLK3/PTGS2	4
GOBP_CIRCADIAN_REGULATION_OF_GENE_EXPRESSION	GOBP_CIRCADIAN_REGULATION_OF_GENE_EXPRESSION	GOBP_CIRCADIAN_REGULATION_OF_GENE_EXPRESSION	2/201	69/17872	0.181992016005848	0.322408768756052	0.23152313792846	NAMPT/EGR1	2
GOBP_POSITIVE_REGULATION_OF_LIPASE_ACTIVITY	GOBP_POSITIVE_REGULATION_OF_LIPASE_ACTIVITY	GOBP_POSITIVE_REGULATION_OF_LIPASE_ACTIVITY	2/201	69/17872	0.181992016005848	0.322408768756052	0.23152313792846	FLT1/ABL2	2
GOBP_REGULATION_OF_LIPID_KINASE_ACTIVITY	GOBP_REGULATION_OF_LIPID_KINASE_ACTIVITY	GOBP_REGULATION_OF_LIPID_KINASE_ACTIVITY	2/201	69/17872	0.181992016005848	0.322408768756052	0.23152313792846	FPR2/FLT1	2
GOBP_REGULATION_OF_DNA_RECOMBINATION	GOBP_REGULATION_OF_DNA_RECOMBINATION	GOBP_REGULATION_OF_DNA_RECOMBINATION	3/201	131/17872	0.183241785298568	0.322408768756052	0.23152313792846	OOEP/BCL6/HELB	3
GOBP_REGULATION_OF_DNA_REPLICATION	GOBP_REGULATION_OF_DNA_REPLICATION	GOBP_REGULATION_OF_DNA_REPLICATION	3/201	131/17872	0.183241785298568	0.322408768756052	0.23152313792846	EREG/BCL6/BAZ1A	3
GOBP_REGULATION_OF_AUTOPHAGY	GOBP_REGULATION_OF_AUTOPHAGY	GOBP_REGULATION_OF_AUTOPHAGY	6/201	339/17872	0.183593695691563	0.322408768756052	0.23152313792846	PLK3/ATF6/STAT3/MEFV/ABL2/EIF4E	6
GOBP_ASYMMETRIC_CELL_DIVISION	GOBP_ASYMMETRIC_CELL_DIVISION	GOBP_ASYMMETRIC_CELL_DIVISION	1/201	18/17872	0.184279903026841	0.322408768756052	0.23152313792846	ZBTB16	1
GOBP_BRANCH_ELONGATION_OF_AN_EPITHELIUM	GOBP_BRANCH_ELONGATION_OF_AN_EPITHELIUM	GOBP_BRANCH_ELONGATION_OF_AN_EPITHELIUM	1/201	18/17872	0.184279903026841	0.322408768756052	0.23152313792846	AREG	1
GOBP_CELL_CELL_JUNCTION_MAINTENANCE	GOBP_CELL_CELL_JUNCTION_MAINTENANCE	GOBP_CELL_CELL_JUNCTION_MAINTENANCE	1/201	18/17872	0.184279903026841	0.322408768756052	0.23152313792846	MTSS1	1
GOBP_CELLULAR_RESPONSE_TO_ATP	GOBP_CELLULAR_RESPONSE_TO_ATP	GOBP_CELLULAR_RESPONSE_TO_ATP	1/201	18/17872	0.184279903026841	0.322408768756052	0.23152313792846	PTGS2	1
GOBP_CELLULAR_RESPONSE_TO_LEPTIN_STIMULUS	GOBP_CELLULAR_RESPONSE_TO_LEPTIN_STIMULUS	GOBP_CELLULAR_RESPONSE_TO_LEPTIN_STIMULUS	1/201	18/17872	0.184279903026841	0.322408768756052	0.23152313792846	STAT3	1
GOBP_DNA_DAMAGE_RESPONSE_SIGNAL_TRANSDUCTION_BY_P53_CLASS_MEDIATOR_RESULTING_IN_CELL_CYCLE_ARREST	GOBP_DNA_DAMAGE_RESPONSE_SIGNAL_TRANSDUCTION_BY_P53_CLASS_MEDIATOR_RESULTING_IN_CELL_CYCLE_ARREST	GOBP_DNA_DAMAGE_RESPONSE_SIGNAL_TRANSDUCTION_BY_P53_CLASS_MEDIATOR_RESULTING_IN_CELL_CYCLE_ARREST	1/201	18/17872	0.184279903026841	0.322408768756052	0.23152313792846	PLK3	1
GOBP_DNA_DAMAGE_RESPONSE_SIGNAL_TRANSDUCTION_RESULTING_IN_TRANSCRIPTION	GOBP_DNA_DAMAGE_RESPONSE_SIGNAL_TRANSDUCTION_RESULTING_IN_TRANSCRIPTION	GOBP_DNA_DAMAGE_RESPONSE_SIGNAL_TRANSDUCTION_RESULTING_IN_TRANSCRIPTION	1/201	18/17872	0.184279903026841	0.322408768756052	0.23152313792846	HIPK2	1
GOBP_HEPATOCYTE_APOPTOTIC_PROCESS	GOBP_HEPATOCYTE_APOPTOTIC_PROCESS	GOBP_HEPATOCYTE_APOPTOTIC_PROCESS	1/201	18/17872	0.184279903026841	0.322408768756052	0.23152313792846	CFLAR	1
[truncated: 1,295 more rows]
