# Supplementary material for: Single-Cell Sequencing of Lung Macrophages and Monocytes Reveals Novel Therapeutic Targets in COPD
Source: Cells. 2023 Dec 5;12(24):2771. doi: 10.3390/cells12242771 (PMC10741950; doi:10.3390/cells12242771)
Supplement: Supplementary file 1 [file cells-12-02771-s001.zip › Table S7_GO_BP_1511down.csv]

	ID	Description	GeneRatio	BgRatio	pvalue	p.adjust	qvalue	geneID	Count
GOBP_CYTOPLASMIC_TRANSLATION	GOBP_CYTOPLASMIC_TRANSLATION	GOBP_CYTOPLASMIC_TRANSLATION	34/171	148/17872	9.8552906384195e-38	2.0932637316003e-34	1.77810191097379e-34	RPL15/RPL8/RPS15/RPLP1/RPS2/RPS18/RPS26/RPS25/RPS14/RPS3/RPL27A/RPL13/RPL19/RPL7A/RPL28/RPL27/RPS9/RPS6/UBA52/RPL3/RPL35A/RPL18A/RPS13/RPS20/RPS5/RPL10A/RPL11/RPL12/RPL29/RPL18/RPL7/RPL4/RPS19/YBX1	34
GOBP_ATP_METABOLIC_PROCESS	GOBP_ATP_METABOLIC_PROCESS	GOBP_ATP_METABOLIC_PROCESS	15/171	273/17872	5.9251776207753e-08	6.29253863326337e-05	5.34513391684677e-05	TMSB4X/HIF1A/TSPO/COX5B/ATP5MG/COX7C/HSPA8/COX4I1/COX6A1/UQCRB/UQCR10/ALDOA/NDUFB10/TPI1/NDUFA4	15
GOBP_RIBOSOME_BIOGENESIS	GOBP_RIBOSOME_BIOGENESIS	GOBP_RIBOSOME_BIOGENESIS	15/171	303/17872	2.29838582141179e-07	0.000136565408478575	0.00011600411841227	RPS15/NOP10/RPS25/RPS14/RPL7A/RPL27/RPS6/RPL3/RPL35A/RPS5/USP36/RPL10A/RPL11/RPL7/RPS19	15
GOBP_PROTON_TRANSMEMBRANE_TRANSPORT	GOBP_PROTON_TRANSMEMBRANE_TRANSPORT	GOBP_PROTON_TRANSMEMBRANE_TRANSPORT	11/171	153/17872	2.57185326701648e-07	0.000136565408478575	0.00011600411841227	TMSB4X/COX5B/ATP5MG/ATP6V0E1/ATP6V1F/COX4I1/COX6A1/COX6B1/UQCR10/ATP6V1G1/NDUFA4	11
GOBP_NEUTROPHIL_ACTIVATION_INVOLVED_IN_IMMUNE_RESPONSE	GOBP_NEUTROPHIL_ACTIVATION_INVOLVED_IN_IMMUNE_RESPONSE	GOBP_NEUTROPHIL_ACTIVATION_INVOLVED_IN_IMMUNE_RESPONSE	5/171	21/17872	1.35937956447184e-06	0.000545132488679777	0.000463057332538972	TYROBP/VAMP8/ITGB2/FCER1G/STXBP2	5
GOBP_RRNA_METABOLIC_PROCESS	GOBP_RRNA_METABOLIC_PROCESS	GOBP_RRNA_METABOLIC_PROCESS	13/171	263/17872	1.53992228440615e-06	0.000545132488679777	0.000463057332538972	RPS15/NOP10/RPS25/RPS14/RPL7A/RPL27/RPS6/RPL35A/USP36/RPL10A/RPL11/RPL7/RPS19	13
GOBP_ATP_SYNTHESIS_COUPLED_ELECTRON_TRANSPORT	GOBP_ATP_SYNTHESIS_COUPLED_ELECTRON_TRANSPORT	GOBP_ATP_SYNTHESIS_COUPLED_ELECTRON_TRANSPORT	8/171	92/17872	2.80257095910021e-06	0.000850380102446979	0.000722346860736506	COX5B/COX7C/COX4I1/COX6A1/UQCRB/UQCR10/NDUFB10/NDUFA4	8
GOBP_CELLULAR_OXIDANT_DETOXIFICATION	GOBP_CELLULAR_OXIDANT_DETOXIFICATION	GOBP_CELLULAR_OXIDANT_DETOXIFICATION	8/171	100/17872	5.25129699364981e-06	0.00127298030346609	0.00108132036878823	GPX1/APOE/S100A9/TXNDC17/CD36/SELENOT/GSTP1/MGST3	8
GOBP_POSITIVE_REGULATION_OF_RESPONSE_TO_EXTERNAL_STIMULUS	GOBP_POSITIVE_REGULATION_OF_RESPONSE_TO_EXTERNAL_STIMULUS	GOBP_POSITIVE_REGULATION_OF_RESPONSE_TO_EXTERNAL_STIMULUS	16/171	441/17872	5.39398433672074e-06	0.00127298030346609	0.00108132036878823	TMSB4X/CYBA/TYROBP/VAMP8/AIF1/GRN/PYCARD/S100A9/LGALS1/HSP90AA1/FCN1/S100A8/MNDA/STX3/RPS19/OXSR1	16
GOBP_GRANULOCYTE_ACTIVATION	GOBP_GRANULOCYTE_ACTIVATION	GOBP_GRANULOCYTE_ACTIVATION	6/171	48/17872	6.18136149950967e-06	0.00131292118249585	0.00111524774843785	TYROBP/VAMP8/GRN/ITGB2/FCER1G/STXBP2	6
GOBP_OXIDATIVE_PHOSPHORYLATION	GOBP_OXIDATIVE_PHOSPHORYLATION	GOBP_OXIDATIVE_PHOSPHORYLATION	9/171	139/17872	7.69557925040331e-06	0.00137582659923288	0.00116868212463334	COX5B/ATP5MG/COX7C/COX4I1/COX6A1/UQCRB/UQCR10/NDUFB10/NDUFA4	9
GOBP_RIBONUCLEOPROTEIN_COMPLEX_BIOGENESIS	GOBP_RIBONUCLEOPROTEIN_COMPLEX_BIOGENESIS	GOBP_RIBONUCLEOPROTEIN_COMPLEX_BIOGENESIS	16/171	454/17872	7.77303163408409e-06	0.00137582659923288	0.00116868212463334	RPS15/NOP10/RPS25/RPS14/RPL7A/RPL27/RPS6/RPL3/RPL35A/RPS5/USP36/RPL10A/RPL11/RPL7/HSP90AA1/RPS19	16
GOBP_RESPIRATORY_ELECTRON_TRANSPORT_CHAIN	GOBP_RESPIRATORY_ELECTRON_TRANSPORT_CHAIN	GOBP_RESPIRATORY_ELECTRON_TRANSPORT_CHAIN	8/171	113/17872	1.29978873257546e-05	0.00197261198860924	0.00167561549632086	COX5B/COX7C/COX4I1/COX6A1/UQCRB/UQCR10/NDUFB10/NDUFA4	8
GOBP_AEROBIC_RESPIRATION	GOBP_AEROBIC_RESPIRATION	GOBP_AEROBIC_RESPIRATION	10/171	187/17872	1.30021505840534e-05	0.00197261198860924	0.00167561549632086	HIF1A/COX5B/ATP5MG/COX7C/COX4I1/COX6A1/UQCRB/UQCR10/NDUFB10/NDUFA4	10
GOBP_REGULATION_OF_SUPEROXIDE_METABOLIC_PROCESS	GOBP_REGULATION_OF_SUPEROXIDE_METABOLIC_PROCESS	GOBP_REGULATION_OF_SUPEROXIDE_METABOLIC_PROCESS	5/171	34/17872	1.68086854758018e-05	0.00238010986337354	0.0020217604845982	CYBA/TYROBP/ITGB2/CD36/GSTP1	5
GOBP_POSITIVE_REGULATION_OF_DEFENSE_RESPONSE	GOBP_POSITIVE_REGULATION_OF_DEFENSE_RESPONSE	GOBP_POSITIVE_REGULATION_OF_DEFENSE_RESPONSE	12/171	288/17872	2.20207216545116e-05	0.0026459910858465	0.00224761062599906	CYBA/TYROBP/VAMP8/GRN/PYCARD/S100A9/LGALS1/HSP90AA1/FCN1/S100A8/MNDA/RPS19	12
GOBP_MITOCHONDRIAL_ELECTRON_TRANSPORT_CYTOCHROME_C_TO_OXYGEN	GOBP_MITOCHONDRIAL_ELECTRON_TRANSPORT_CYTOCHROME_C_TO_OXYGEN	GOBP_MITOCHONDRIAL_ELECTRON_TRANSPORT_CYTOCHROME_C_TO_OXYGEN	4/171	18/17872	2.22978863426774e-05	0.0026459910858465	0.00224761062599906	COX5B/COX7C/COX4I1/COX6A1	4
GOBP_CELLULAR_RESPONSE_TO_LIPOPROTEIN_PARTICLE_STIMULUS	GOBP_CELLULAR_RESPONSE_TO_LIPOPROTEIN_PARTICLE_STIMULUS	GOBP_CELLULAR_RESPONSE_TO_LIPOPROTEIN_PARTICLE_STIMULUS	5/171	36/17872	2.24236532698856e-05	0.0026459910858465	0.00224761062599906	APOE/ITGB2/FCER1G/CD36/CD9	5
GOBP_CELLULAR_RESPONSE_TO_TOXIC_SUBSTANCE	GOBP_CELLULAR_RESPONSE_TO_TOXIC_SUBSTANCE	GOBP_CELLULAR_RESPONSE_TO_TOXIC_SUBSTANCE	8/171	123/17872	2.41264868202654e-05	0.00269708726348652	0.00229101376232327	GPX1/APOE/S100A9/TXNDC17/CD36/SELENOT/GSTP1/MGST3	8
GOBP_NCRNA_PROCESSING	GOBP_NCRNA_PROCESSING	GOBP_NCRNA_PROCESSING	14/171	393/17872	2.61173243402935e-05	0.00270651752956521	0.0022990242073916	RPS15/NOP10/RPS25/RPS14/RPL7A/RPL27/RPS6/RPL35A/USP36/RPL10A/RPL11/RPL7/PTCD1/RPS19	14
GOBP_RIBOSOME_ASSEMBLY	GOBP_RIBOSOME_ASSEMBLY	GOBP_RIBOSOME_ASSEMBLY	6/171	62/17872	2.77237162145649e-05	0.00270651752956521	0.0022990242073916	RPS15/RPS14/RPL3/RPS5/RPL11/RPS19	6
GOBP_RIBOSOMAL_SMALL_SUBUNIT_ASSEMBLY	GOBP_RIBOSOMAL_SMALL_SUBUNIT_ASSEMBLY	GOBP_RIBOSOMAL_SMALL_SUBUNIT_ASSEMBLY	4/171	19/17872	2.80336090632931e-05	0.00270651752956521	0.0022990242073916	RPS15/RPS14/RPS5/RPS19	4
GOBP_RECEPTOR_MEDIATED_ENDOCYTOSIS	GOBP_RECEPTOR_MEDIATED_ENDOCYTOSIS	GOBP_RECEPTOR_MEDIATED_ENDOCYTOSIS	11/171	251/17872	3.07871488445064e-05	0.00284312626720573	0.0024150651313265	CD63/APOE/ITGB2/APOC1/FCER1G/CD14/AP2S1/CD36/EZR/PPT1/CD9	11
GOBP_ELECTRON_TRANSPORT_CHAIN	GOBP_ELECTRON_TRANSPORT_CHAIN	GOBP_ELECTRON_TRANSPORT_CHAIN	9/171	167/17872	3.34261375559294e-05	0.00295821317369975	0.00251282455135364	CYBA/COX5B/COX7C/COX4I1/COX6A1/UQCRB/UQCR10/NDUFB10/NDUFA4	9
GOBP_MYELOID_CELL_ACTIVATION_INVOLVED_IN_IMMUNE_RESPONSE	GOBP_MYELOID_CELL_ACTIVATION_INVOLVED_IN_IMMUNE_RESPONSE	GOBP_MYELOID_CELL_ACTIVATION_INVOLVED_IN_IMMUNE_RESPONSE	7/171	95/17872	3.53617831401002e-05	0.00300433709558291	0.0025520040548266	TYROBP/VAMP8/GRN/PYCARD/ITGB2/FCER1G/STXBP2	7
GOBP_CELLULAR_RESPONSE_TO_LOW_DENSITY_LIPOPROTEIN_PARTICLE_STIMULUS	GOBP_CELLULAR_RESPONSE_TO_LOW_DENSITY_LIPOPROTEIN_PARTICLE_STIMULUS	GOBP_CELLULAR_RESPONSE_TO_LOW_DENSITY_LIPOPROTEIN_PARTICLE_STIMULUS	4/171	21/17872	4.2644993386204e-05	0.00348376792124221	0.00295925176777141	ITGB2/FCER1G/CD36/CD9	4
GOBP_REGULATION_OF_SUPEROXIDE_ANION_GENERATION	GOBP_REGULATION_OF_SUPEROXIDE_ANION_GENERATION	GOBP_REGULATION_OF_SUPEROXIDE_ANION_GENERATION	4/171	22/17872	5.17337440297846e-05	0.00399986649606396	0.00339764653298326	CYBA/TYROBP/ITGB2/GSTP1	4
GOBP_PROTEIN_TARGETING	GOBP_PROTEIN_TARGETING	GOBP_PROTEIN_TARGETING	12/171	315/17872	5.27289368596002e-05	0.00399986649606396	0.00339764653298326	TSPO/SRP14/ITGB2/USP36/RPL11/GABARAP/HSPA8/NACA/HSP90AA1/SEC62/ZFYVE16/YWHAB	12
GOBP_POSITIVE_REGULATION_OF_REACTIVE_OXYGEN_SPECIES_METABOLIC_PROCESS	GOBP_POSITIVE_REGULATION_OF_REACTIVE_OXYGEN_SPECIES_METABOLIC_PROCESS	GOBP_POSITIVE_REGULATION_OF_REACTIVE_OXYGEN_SPECIES_METABOLIC_PROCESS	6/171	71/17872	6.01628521661297e-05	0.00440641027589171	0.00374298107487283	CYBA/TYROBP/TSPO/ITGB2/CD36/GSTP1	6
GOBP_RIBOSOMAL_LARGE_SUBUNIT_BIOGENESIS	GOBP_RIBOSOMAL_LARGE_SUBUNIT_BIOGENESIS	GOBP_RIBOSOMAL_LARGE_SUBUNIT_BIOGENESIS	6/171	72/17872	6.51169328821867e-05	0.0044946560618742	0.00381794057391831	RPL7A/RPL3/RPL35A/RPL10A/RPL11/RPL7	6
GOBP_REGULATION_OF_SUPRAMOLECULAR_FIBER_ORGANIZATION	GOBP_REGULATION_OF_SUPRAMOLECULAR_FIBER_ORGANIZATION	GOBP_REGULATION_OF_SUPRAMOLECULAR_FIBER_ORGANIZATION	13/171	374/17872	6.55999707712335e-05	0.0044946560618742	0.00381794057391831	TMSB4X/TMSB10/GPX1/PFN1/RPS3/PFDN5/APOE/PYCARD/GMFG/HSPA8/ACTG1/ARPC2/CAPG	13
GOBP_RIBOSOMAL_SMALL_SUBUNIT_BIOGENESIS	GOBP_RIBOSOMAL_SMALL_SUBUNIT_BIOGENESIS	GOBP_RIBOSOMAL_SMALL_SUBUNIT_BIOGENESIS	6/171	73/17872	7.03913713919905e-05	0.00467222727614337	0.00396877666335104	RPS15/RPS25/RPS14/RPS6/RPS5/RPS19	6
GOBP_CELLULAR_RESPIRATION	GOBP_CELLULAR_RESPIRATION	GOBP_CELLULAR_RESPIRATION	10/171	231/17872	7.86873533480086e-05	0.00506460419730819	0.00430207730904264	HIF1A/COX5B/ATP5MG/COX7C/COX4I1/COX6A1/UQCRB/UQCR10/NDUFB10/NDUFA4	10
GOBP_GENERATION_OF_PRECURSOR_METABOLITES_AND_ENERGY	GOBP_GENERATION_OF_PRECURSOR_METABOLITES_AND_ENERGY	GOBP_GENERATION_OF_PRECURSOR_METABOLITES_AND_ENERGY	15/171	494/17872	8.31660625156452e-05	0.0051954328465656	0.00441320839479306	CYBA/HIF1A/COX5B/ATP5MG/COX7C/TKT/COX4I1/COX6A1/UQCRB/TALDO1/UQCR10/ALDOA/NDUFB10/TPI1/NDUFA4	15
GOBP_DETOXIFICATION	GOBP_DETOXIFICATION	GOBP_DETOXIFICATION	8/171	150/17872	9.90240254514313e-05	0.00600934371596686	0.00510457683078957	GPX1/APOE/S100A9/TXNDC17/CD36/SELENOT/GSTP1/MGST3	8
GOBP_REGULATION_OF_PROTEIN_MODIFICATION_BY_SMALL_PROTEIN_CONJUGATION_OR_REMOVAL	GOBP_REGULATION_OF_PROTEIN_MODIFICATION_BY_SMALL_PROTEIN_CONJUGATION_OR_REMOVAL	GOBP_REGULATION_OF_PROTEIN_MODIFICATION_BY_SMALL_PROTEIN_CONJUGATION_OR_REMOVAL	10/171	245/17872	0.000127856932057029	0.0075435589913647	0.00640780062999262	RPS15/RPS2/HIF1A/TSPO/RPS3/RPS20/RPL11/GABARAP/HSP90AA1/MALT1	10
GOBP_NEGATIVE_REGULATION_OF_UBIQUITIN_PROTEIN_LIGASE_ACTIVITY	GOBP_NEGATIVE_REGULATION_OF_UBIQUITIN_PROTEIN_LIGASE_ACTIVITY	GOBP_NEGATIVE_REGULATION_OF_UBIQUITIN_PROTEIN_LIGASE_ACTIVITY	3/171	12/17872	0.000177703880082039	0.010201163278223	0.00866527597327497	RPS15/RPS20/RPL11	3
GOBP_TRANSLATIONAL_ELONGATION	GOBP_TRANSLATIONAL_ELONGATION	GOBP_TRANSLATIONAL_ELONGATION	5/171	56/17872	0.000194719025753565	0.0108837687026466	0.00924510831417204	RPLP1/EEF1G/RACK1/EEF1B2/SELENOT	5
GOBP_POSITIVE_REGULATION_OF_CYTOKINE_PRODUCTION	GOBP_POSITIVE_REGULATION_OF_CYTOKINE_PRODUCTION	GOBP_POSITIVE_REGULATION_OF_CYTOKINE_PRODUCTION	14/171	476/17872	0.000200531229798957	0.0109212392844355	0.00927693732457253	CYBA/TYROBP/HIF1A/RPS3/AIF1/PYCARD/FCER1G/CD14/SULF2/HSP90AA1/FCN1/CD36/MNDA/MALT1	14
GOBP_NEGATIVE_REGULATION_OF_SUPRAMOLECULAR_FIBER_ORGANIZATION	GOBP_NEGATIVE_REGULATION_OF_SUPRAMOLECULAR_FIBER_ORGANIZATION	GOBP_NEGATIVE_REGULATION_OF_SUPRAMOLECULAR_FIBER_ORGANIZATION	8/171	168/17872	0.000216478177936421	0.011494991248424	0.00976430518376383	TMSB4X/TMSB10/PFN1/PFDN5/APOE/GMFG/HSPA8/CAPG	8
GOBP_ACTIVATION_OF_INNATE_IMMUNE_RESPONSE	GOBP_ACTIVATION_OF_INNATE_IMMUNE_RESPONSE	GOBP_ACTIVATION_OF_INNATE_IMMUNE_RESPONSE	5/171	58/17872	0.000230009405803687	0.0119156092177324	0.0101215949049427	TYROBP/PYCARD/HSP90AA1/FCN1/MNDA	5
GOBP_INTERLEUKIN_1_PRODUCTION	GOBP_INTERLEUKIN_1_PRODUCTION	GOBP_INTERLEUKIN_1_PRODUCTION	7/171	130/17872	0.00025560336211081	0.0129262271696038	0.0109800542019531	TYROBP/PYCARD/CD36/CARD16/MNDA/GSTP1/MALT1	7
GOBP_NEUTROPHIL_DEGRANULATION	GOBP_NEUTROPHIL_DEGRANULATION	GOBP_NEUTROPHIL_DEGRANULATION	3/171	14/17872	0.000289904232795507	0.0139944679649468	0.0118874606462081	VAMP8/ITGB2/STXBP2	3
GOBP_POSITIVE_REGULATION_BY_HOST_OF_VIRAL_PROCESS	GOBP_POSITIVE_REGULATION_BY_HOST_OF_VIRAL_PROCESS	GOBP_POSITIVE_REGULATION_BY_HOST_OF_VIRAL_PROCESS	3/171	14/17872	0.000289904232795507	0.0139944679649468	0.0118874606462081	APOE/HSPA8/CFL1	3
GOBP_ACTIVATION_OF_IMMUNE_RESPONSE	GOBP_ACTIVATION_OF_IMMUNE_RESPONSE	GOBP_ACTIVATION_OF_IMMUNE_RESPONSE	12/171	379/17872	0.000297211623734618	0.014028388640274	0.0119162742241201	TYROBP/RPS3/PYCARD/FCER1G/CFD/HSP90AA1/FCN1/EZR/C1QB/MNDA/C1QC/MALT1	12
GOBP_POSITIVE_REGULATION_OF_INTERLEUKIN_1_BETA_PRODUCTION	GOBP_POSITIVE_REGULATION_OF_INTERLEUKIN_1_BETA_PRODUCTION	GOBP_POSITIVE_REGULATION_OF_INTERLEUKIN_1_BETA_PRODUCTION	5/171	62/17872	0.000314982336721249	0.0145439670259985	0.0123542271199135	TYROBP/PYCARD/CD36/MNDA/MALT1	5
GOBP_POSITIVE_REGULATION_OF_RESPONSE_TO_BIOTIC_STIMULUS	GOBP_POSITIVE_REGULATION_OF_RESPONSE_TO_BIOTIC_STIMULUS	GOBP_POSITIVE_REGULATION_OF_RESPONSE_TO_BIOTIC_STIMULUS	8/171	179/17872	0.000332556311870736	0.0150287150300733	0.0127659914568072	CYBA/TYROBP/GRN/PYCARD/HSP90AA1/FCN1/MNDA/RPS19	8
GOBP_REGULATION_OF_DENDRITIC_CELL_DIFFERENTIATION	GOBP_REGULATION_OF_DENDRITIC_CELL_DIFFERENTIATION	GOBP_REGULATION_OF_DENDRITIC_CELL_DIFFERENTIATION	3/171	15/17872	0.000359837202932082	0.0158418812096513	0.0134567273234921	LGALS1/TMEM176B/TMEM176A	3
GOBP_REGULATION_OF_NITRIC_OXIDE_METABOLIC_PROCESS	GOBP_REGULATION_OF_NITRIC_OXIDE_METABOLIC_PROCESS	GOBP_REGULATION_OF_NITRIC_OXIDE_METABOLIC_PROCESS	5/171	64/17872	0.000365467127717943	0.0158418812096513	0.0134567273234921	DDAH2/TSPO/AIF1/HSP90AA1/CD36	5
GOBP_PRODUCTION_OF_MOLECULAR_MEDIATOR_INVOLVED_IN_INFLAMMATORY_RESPONSE	GOBP_PRODUCTION_OF_MOLECULAR_MEDIATOR_INVOLVED_IN_INFLAMMATORY_RESPONSE	GOBP_PRODUCTION_OF_MOLECULAR_MEDIATOR_INVOLVED_IN_INFLAMMATORY_RESPONSE	6/171	100/17872	0.000398612952633359	0.0166010570861422	0.0141016016679789	VAMP8/HIF1A/GRN/PYCARD/CD36/RPS19	6
GOBP_REGULATION_OF_PHAGOCYTOSIS	GOBP_REGULATION_OF_PHAGOCYTOSIS	GOBP_REGULATION_OF_PHAGOCYTOSIS	6/171	100/17872	0.000398612952633359	0.0166010570861422	0.0141016016679789	CYBA/RACK1/PYCARD/FCER1G/FCN1/CD36	6
GOBP_ACTIN_FILAMENT_SEVERING	GOBP_ACTIN_FILAMENT_SEVERING	GOBP_ACTIN_FILAMENT_SEVERING	3/171	16/17872	0.000439769936189837	0.0176239876314568	0.0149705197741684	GMFG/CFL1/CAPG	3
GOBP_SEQUESTERING_OF_METAL_ION	GOBP_SEQUESTERING_OF_METAL_ION	GOBP_SEQUESTERING_OF_METAL_ION	3/171	16/17872	0.000439769936189837	0.0176239876314568	0.0149705197741684	FTL/S100A9/S100A8	3
GOBP_REGULATION_OF_PROTEIN_LOCALIZATION_TO_PLASMA_MEMBRANE	GOBP_REGULATION_OF_PROTEIN_LOCALIZATION_TO_PLASMA_MEMBRANE	GOBP_REGULATION_OF_PROTEIN_LOCALIZATION_TO_PLASMA_MEMBRANE	6/171	103/17872	0.000467001836874009	0.0183687389170443	0.015603141294387	VAMP8/ACTB/RACK1/TMEM59/EZR/STX3	6
GOBP_REGULATION_OF_PROTEIN_CONTAINING_COMPLEX_ASSEMBLY	GOBP_REGULATION_OF_PROTEIN_CONTAINING_COMPLEX_ASSEMBLY	GOBP_REGULATION_OF_PROTEIN_CONTAINING_COMPLEX_ASSEMBLY	12/171	401/17872	0.000493003068954994	0.0187975990127559	0.015967432207287	TMSB4X/TMSB10/PFN1/RPS3/RACK1/APOE/PYCARD/HSPA8/HSP90AA1/CD36/ARPC2/CAPG	12
GOBP_POSITIVE_REGULATION_OF_INFLAMMATORY_RESPONSE	GOBP_POSITIVE_REGULATION_OF_INFLAMMATORY_RESPONSE	GOBP_POSITIVE_REGULATION_OF_INFLAMMATORY_RESPONSE	7/171	145/17872	0.000495605247040646	0.0187975990127559	0.015967432207287	VAMP8/GRN/PYCARD/S100A9/LGALS1/S100A8/RPS19	7
GOBP_CELL_ACTIVATION_INVOLVED_IN_IMMUNE_RESPONSE	GOBP_CELL_ACTIVATION_INVOLVED_IN_IMMUNE_RESPONSE	GOBP_CELL_ACTIVATION_INVOLVED_IN_IMMUNE_RESPONSE	10/171	291/17872	0.000505677334355118	0.0188431343538644	0.016006111746716	TYROBP/VAMP8/GRN/RPS6/PYCARD/ITGB2/FCER1G/LGALS1/STXBP2/MALT1	10
GOBP_RESPONSE_TO_HYDROPEROXIDE	GOBP_RESPONSE_TO_HYDROPEROXIDE	GOBP_RESPONSE_TO_HYDROPEROXIDE	3/171	17/17872	0.000530262139586095	0.0193665610372081	0.0164507313003145	GPX1/AIF1/CD36	3
GOBP_REGULATION_OF_REACTIVE_OXYGEN_SPECIES_METABOLIC_PROCESS	GOBP_REGULATION_OF_REACTIVE_OXYGEN_SPECIES_METABOLIC_PROCESS	GOBP_REGULATION_OF_REACTIVE_OXYGEN_SPECIES_METABOLIC_PROCESS	7/171	147/17872	0.000537960028811336	0.0193665610372081	0.0164507313003145	CYBA/TYROBP/HIF1A/TSPO/ITGB2/CD36/GSTP1	7
GOBP_REGULATION_OF_RESPONSE_TO_BIOTIC_STIMULUS	GOBP_REGULATION_OF_RESPONSE_TO_BIOTIC_STIMULUS	GOBP_REGULATION_OF_RESPONSE_TO_BIOTIC_STIMULUS	11/171	350/17872	0.000564564961824621	0.0199855996485916	0.0169765674485509	CYBA/TYROBP/GRN/APOE/PYCARD/HSP90AA1/FCN1/CD36/CARD16/MNDA/RPS19	11
GOBP_POSITIVE_REGULATION_OF_PROTEIN_CONTAINING_COMPLEX_ASSEMBLY	GOBP_POSITIVE_REGULATION_OF_PROTEIN_CONTAINING_COMPLEX_ASSEMBLY	GOBP_POSITIVE_REGULATION_OF_PROTEIN_CONTAINING_COMPLEX_ASSEMBLY	8/171	195/17872	0.000587677557251495	0.0202606783893989	0.0172102303297798	PFN1/RPS3/RACK1/PYCARD/HSP90AA1/CD36/ARPC2/CAPG	8
GOBP_POSITIVE_REGULATION_OF_PHAGOCYTOSIS	GOBP_POSITIVE_REGULATION_OF_PHAGOCYTOSIS	GOBP_POSITIVE_REGULATION_OF_PHAGOCYTOSIS	5/171	71/17872	0.000591413399313904	0.0202606783893989	0.0172102303297798	CYBA/PYCARD/FCER1G/FCN1/CD36	5
GOBP_ACTIN_POLYMERIZATION_OR_DEPOLYMERIZATION	GOBP_ACTIN_POLYMERIZATION_OR_DEPOLYMERIZATION	GOBP_ACTIN_POLYMERIZATION_OR_DEPOLYMERIZATION	8/171	196/17872	0.000607779034506382	0.0204908360205009	0.017405735424293	TMSB4X/TMSB10/PFN1/AIF1/PYCARD/CFL1/ARPC2/CAPG	8
GOBP_SUPEROXIDE_METABOLIC_PROCESS	GOBP_SUPEROXIDE_METABOLIC_PROCESS	GOBP_SUPEROXIDE_METABOLIC_PROCESS	5/171	72/17872	0.000630689255017764	0.020930999650902	0.0177796280115205	CYBA/TYROBP/ITGB2/CD36/GSTP1	5
GOBP_RESPONSE_TO_TUMOR_NECROSIS_FACTOR	GOBP_RESPONSE_TO_TUMOR_NECROSIS_FACTOR	GOBP_RESPONSE_TO_TUMOR_NECROSIS_FACTOR	9/171	248/17872	0.000653869521767943	0.0213664440651555	0.0181495119078584	TMSB4X/CYBA/RPS3/PYCARD/TXNDC17/CD14/MAP4K3/CARD16/GSTP1	9
GOBP_POSITIVE_REGULATION_OF_INTERLEUKIN_1_PRODUCTION	GOBP_POSITIVE_REGULATION_OF_INTERLEUKIN_1_PRODUCTION	GOBP_POSITIVE_REGULATION_OF_INTERLEUKIN_1_PRODUCTION	5/171	73/17872	0.000671887628813776	0.0216225655090979	0.018367071703139	TYROBP/PYCARD/CD36/MNDA/MALT1	5
GOBP_REGULATION_OF_PROTEIN_POLYMERIZATION	GOBP_REGULATION_OF_PROTEIN_POLYMERIZATION	GOBP_REGULATION_OF_PROTEIN_POLYMERIZATION	8/171	200/17872	0.00069382000076469	0.0219951295764806	0.0186835425186281	TMSB4X/TMSB10/PFN1/RPS3/PYCARD/HSP90AA1/ARPC2/CAPG	8
GOBP_POSITIVE_REGULATION_OF_NF_KAPPAB_TRANSCRIPTION_FACTOR_ACTIVITY	GOBP_POSITIVE_REGULATION_OF_NF_KAPPAB_TRANSCRIPTION_FACTOR_ACTIVITY	GOBP_POSITIVE_REGULATION_OF_NF_KAPPAB_TRANSCRIPTION_FACTOR_ACTIVITY	7/171	154/17872	0.0007094042592719	0.0221584506866693	0.0188222739998767	RPS3/PYCARD/S100A9/S100A8/CD36/CARD16/MALT1	7
GOBP_PHAGOCYTOSIS	GOBP_PHAGOCYTOSIS	GOBP_PHAGOCYTOSIS	10/171	305/17872	0.0007270187831048	0.022329959139994	0.0189679601377489	CYBA/TYROBP/AIF1/RACK1/PYCARD/ITGB2/FCER1G/CD14/FCN1/CD36	10
GOBP_POSITIVE_REGULATION_OF_NITRIC_OXIDE_METABOLIC_PROCESS	GOBP_POSITIVE_REGULATION_OF_NITRIC_OXIDE_METABOLIC_PROCESS	GOBP_POSITIVE_REGULATION_OF_NITRIC_OXIDE_METABOLIC_PROCESS	4/171	43/17872	0.000746434604020515	0.022329959139994	0.0189679601377489	DDAH2/AIF1/HSP90AA1/CD36	4
GOBP_SUPEROXIDE_ANION_GENERATION	GOBP_SUPEROXIDE_ANION_GENERATION	GOBP_SUPEROXIDE_ANION_GENERATION	4/171	43/17872	0.000746434604020515	0.022329959139994	0.0189679601377489	CYBA/TYROBP/ITGB2/GSTP1	4
GOBP_RECEPTOR_INTERNALIZATION	GOBP_RECEPTOR_INTERNALIZATION	GOBP_RECEPTOR_INTERNALIZATION	6/171	114/17872	0.000799078986991926	0.0235728301162618	0.0200237044401193	CD63/ITGB2/FCER1G/CD36/EZR/CD9	6
GOBP_REGULATION_OF_ENDOCYTOSIS	GOBP_REGULATION_OF_ENDOCYTOSIS	GOBP_REGULATION_OF_ENDOCYTOSIS	8/171	211/17872	0.000982068709785091	0.0285741635559388	0.0242720370378031	CD63/APOE/APOC1/CD14/AP2S1/CD36/PPT1/ZFYVE16	8
GOBP_MICROGLIAL_CELL_ACTIVATION	GOBP_MICROGLIAL_CELL_ACTIVATION	GOBP_MICROGLIAL_CELL_ACTIVATION	4/171	47/17872	0.00104727586431374	0.0300596477811132	0.0255338667344772	TYROBP/AIF1/GRN/ITGB2	4
GOBP_ENERGY_DERIVATION_BY_OXIDATION_OF_ORGANIC_COMPOUNDS	GOBP_ENERGY_DERIVATION_BY_OXIDATION_OF_ORGANIC_COMPOUNDS	GOBP_ENERGY_DERIVATION_BY_OXIDATION_OF_ORGANIC_COMPOUNDS	10/171	321/17872	0.0010722073238793	0.0303649114122618	0.0257931698684789	HIF1A/COX5B/ATP5MG/COX7C/COX4I1/COX6A1/UQCRB/UQCR10/NDUFB10/NDUFA4	10
GOBP_ACTIN_FILAMENT_POLYMERIZATION	GOBP_ACTIN_FILAMENT_POLYMERIZATION	GOBP_ACTIN_FILAMENT_POLYMERIZATION	7/171	166/17872	0.00110152291384516	0.0307846666974622	0.0261497267912827	TMSB4X/TMSB10/PFN1/AIF1/PYCARD/ARPC2/CAPG	7
GOBP_REACTIVE_NITROGEN_SPECIES_METABOLIC_PROCESS	GOBP_REACTIVE_NITROGEN_SPECIES_METABOLIC_PROCESS	GOBP_REACTIVE_NITROGEN_SPECIES_METABOLIC_PROCESS	5/171	82/17872	0.00113915520868779	0.031060004501268	0.026383609730981	DDAH2/TSPO/AIF1/HSP90AA1/CD36	5
GOBP_RECEPTOR_METABOLIC_PROCESS	GOBP_RECEPTOR_METABOLIC_PROCESS	GOBP_RECEPTOR_METABOLIC_PROCESS	7/171	167/17872	0.00114062163422736	0.031060004501268	0.026383609730981	CD63/APOE/ITGB2/FCER1G/CD36/EZR/CD9	7
GOBP_NEGATIVE_REGULATION_OF_UBIQUITIN_PROTEIN_TRANSFERASE_ACTIVITY	GOBP_NEGATIVE_REGULATION_OF_UBIQUITIN_PROTEIN_TRANSFERASE_ACTIVITY	GOBP_NEGATIVE_REGULATION_OF_UBIQUITIN_PROTEIN_TRANSFERASE_ACTIVITY	3/171	22/17872	0.00115942807606914	0.0311724713110233	0.0264791435360759	RPS15/RPS20/RPL11	3
GOBP_MAINTENANCE_OF_LOCATION_IN_CELL	GOBP_MAINTENANCE_OF_LOCATION_IN_CELL	GOBP_MAINTENANCE_OF_LOCATION_IN_CELL	8/171	218/17872	0.00121067989994811	0.0321435513436224	0.0273040177435667	FTL/TMSB4X/CYBA/TMSB10/TSPO/APOE/S100A9/S100A8	8
GOBP_REGULATION_OF_PROTEIN_LOCALIZATION_TO_CELL_PERIPHERY	GOBP_REGULATION_OF_PROTEIN_LOCALIZATION_TO_CELL_PERIPHERY	GOBP_REGULATION_OF_PROTEIN_LOCALIZATION_TO_CELL_PERIPHERY	6/171	124/17872	0.00123723895221292	0.0324431547469167	0.0275585128537096	VAMP8/ACTB/RACK1/TMEM59/EZR/STX3	6
GOBP_REGULATION_OF_INTRINSIC_APOPTOTIC_SIGNALING_PATHWAY	GOBP_REGULATION_OF_INTRINSIC_APOPTOTIC_SIGNALING_PATHWAY	GOBP_REGULATION_OF_INTRINSIC_APOPTOTIC_SIGNALING_PATHWAY	7/171	171/17872	0.00130803905764724	0.0329604723032701	0.0279979430705744	GPX1/HIF1A/RPS3/RACK1/PYCARD/S100A9/S100A8	7
GOBP_ACTIN_FILAMENT_ORGANIZATION	GOBP_ACTIN_FILAMENT_ORGANIZATION	GOBP_ACTIN_FILAMENT_ORGANIZATION	12/171	449/17872	0.00131443864968705	0.0329604723032701	0.0279979430705744	TMSB4X/TMSB10/PFN1/AIF1/PYCARD/GMFG/ACTG1/CFL1/EZR/ALDOA/ARPC2/CAPG	12
GOBP_PROTEIN_POLYMERIZATION	GOBP_PROTEIN_POLYMERIZATION	GOBP_PROTEIN_POLYMERIZATION	9/171	274/17872	0.00131799217814104	0.0329604723032701	0.0279979430705744	TMSB4X/TMSB10/PFN1/RPS3/AIF1/PYCARD/HSP90AA1/ARPC2/CAPG	9
GOBP_MAINTENANCE_OF_LOCATION	GOBP_MAINTENANCE_OF_LOCATION	GOBP_MAINTENANCE_OF_LOCATION	10/171	330/17872	0.00131903961665629	0.0329604723032701	0.0279979430705744	FTL/TMSB4X/CYBA/TMSB10/TSPO/APOE/S100A9/S100A8/CD36/YWHAB	10
GOBP_REGULATION_OF_PROTEIN_LOCALIZATION_TO_MEMBRANE	GOBP_REGULATION_OF_PROTEIN_LOCALIZATION_TO_MEMBRANE	GOBP_REGULATION_OF_PROTEIN_LOCALIZATION_TO_MEMBRANE	7/171	172/17872	0.00135275408900461	0.0334098800586721	0.0283796879871959	VAMP8/ACTB/RACK1/ITGB2/TMEM59/EZR/STX3	7
GOBP_REGULATION_OF_ACTIN_FILAMENT_BASED_PROCESS	GOBP_REGULATION_OF_ACTIN_FILAMENT_BASED_PROCESS	GOBP_REGULATION_OF_ACTIN_FILAMENT_BASED_PROCESS	11/171	392/17872	0.00141704365000912	0.0345954104898779	0.0293867249378783	TMSB4X/TMSB10/PFN1/PYCARD/GMFG/ARHGDIB/ACTG1/EZR/ABRACL/ARPC2/CAPG	11
GOBP_REGULATION_OF_UBIQUITIN_PROTEIN_LIGASE_ACTIVITY	GOBP_REGULATION_OF_UBIQUITIN_PROTEIN_LIGASE_ACTIVITY	GOBP_REGULATION_OF_UBIQUITIN_PROTEIN_LIGASE_ACTIVITY	3/171	24/17872	0.00150258732658031	0.0358594997938943	0.0304604929362349	RPS15/RPS20/RPL11	3
GOBP_VACUOLAR_ACIDIFICATION	GOBP_VACUOLAR_ACIDIFICATION	GOBP_VACUOLAR_ACIDIFICATION	3/171	24/17872	0.00150258732658031	0.0358594997938943	0.0304604929362349	GRN/ATP6V0E1/PPT1	3
GOBP_AUTOPHAGY_OF_MITOCHONDRION	GOBP_AUTOPHAGY_OF_MITOCHONDRION	GOBP_AUTOPHAGY_OF_MITOCHONDRION	5/171	88/17872	0.00156216465710239	0.0365666292302875	0.0310611569534705	HIF1A/TSPO/USP36/GABARAP/MAP1LC3B	5
GOBP_REGULATION_OF_INFLAMMATORY_RESPONSE	GOBP_REGULATION_OF_INFLAMMATORY_RESPONSE	GOBP_REGULATION_OF_INFLAMMATORY_RESPONSE	11/171	397/17872	0.00156664936909424	0.0365666292302875	0.0310611569534705	TMSB4X/VAMP8/GPX1/GRN/APOE/PYCARD/S100A9/LGALS1/S100A8/GSTP1/RPS19	11
GOBP_REGULATION_OF_INNATE_IMMUNE_RESPONSE	GOBP_REGULATION_OF_INNATE_IMMUNE_RESPONSE	GOBP_REGULATION_OF_INNATE_IMMUNE_RESPONSE	8/171	230/17872	0.00169975339165724	0.038918937359044	0.0330593015330565	TYROBP/GRN/APOE/PYCARD/HSP90AA1/FCN1/MNDA/RPS19	8
GOBP_STEROL_TRANSPORT	GOBP_STEROL_TRANSPORT	GOBP_STEROL_TRANSPORT	6/171	132/17872	0.00170407776572085	0.038918937359044	0.0330593015330565	NPC2/TSPO/APOE/EEPD1/APOC1/CD36	6
GOBP_REACTIVE_OXYGEN_SPECIES_METABOLIC_PROCESS	GOBP_REACTIVE_OXYGEN_SPECIES_METABOLIC_PROCESS	GOBP_REACTIVE_OXYGEN_SPECIES_METABOLIC_PROCESS	8/171	231/17872	0.00174667690225544	0.0394674653233038	0.0335252431183183	CYBA/TYROBP/GPX1/HIF1A/TSPO/ITGB2/CD36/GSTP1	8
GOBP_REGULATION_OF_CYSTEINE_TYPE_ENDOPEPTIDASE_ACTIVITY	GOBP_REGULATION_OF_CYSTEINE_TYPE_ENDOPEPTIDASE_ACTIVITY	GOBP_REGULATION_OF_CYSTEINE_TYPE_ENDOPEPTIDASE_ACTIVITY	8/171	232/17872	0.00179461965794844	0.0397310152621351	0.0337491129741796	GPX1/RPS3/RACK1/PYCARD/S100A9/S100A8/CARD16/MALT1	8
GOBP_CELLULAR_COMPONENT_DISASSEMBLY	GOBP_CELLULAR_COMPONENT_DISASSEMBLY	GOBP_CELLULAR_COMPONENT_DISASSEMBLY	12/171	466/17872	0.0017957521022434	0.0397310152621351	0.0337491129741796	VAMP8/HIF1A/TSPO/USP36/GABARAP/HSPA8/CST3/CFL1/C1QB/C1QC/MAP1LC3B/CAPG	12
GOBP_MYELOID_LEUKOCYTE_ACTIVATION	GOBP_MYELOID_LEUKOCYTE_ACTIVATION	GOBP_MYELOID_LEUKOCYTE_ACTIVATION	8/171	234/17872	0.00189362508085659	0.0414645326983443	0.0352216319977015	TYROBP/VAMP8/AIF1/GRN/PYCARD/ITGB2/FCER1G/STXBP2	8
GOBP_POSITIVE_REGULATION_OF_PROTEIN_POLYMERIZATION	GOBP_POSITIVE_REGULATION_OF_PROTEIN_POLYMERIZATION	GOBP_POSITIVE_REGULATION_OF_PROTEIN_POLYMERIZATION	5/171	93/17872	0.00199467586464587	0.0432315462908961	0.0367226039957359	PFN1/RPS3/PYCARD/HSP90AA1/ARPC2	5
GOBP_REGULATION_OF_UBIQUITIN_PROTEIN_TRANSFERASE_ACTIVITY	GOBP_REGULATION_OF_UBIQUITIN_PROTEIN_TRANSFERASE_ACTIVITY	GOBP_REGULATION_OF_UBIQUITIN_PROTEIN_TRANSFERASE_ACTIVITY	4/171	56/17872	0.00201750334891343	0.0432846173039609	0.036767684636232	RPS15/RPS2/RPS20/RPL11	4
GOBP_NITRIC_OXIDE_MEDIATED_SIGNAL_TRANSDUCTION	GOBP_NITRIC_OXIDE_MEDIATED_SIGNAL_TRANSDUCTION	GOBP_NITRIC_OXIDE_MEDIATED_SIGNAL_TRANSDUCTION	3/171	27/17872	0.00212630021091626	0.0451626164798614	0.038362932226426	DDAH2/APOE/CD36	3
GOBP_POSITIVE_REGULATION_OF_INNATE_IMMUNE_RESPONSE	GOBP_POSITIVE_REGULATION_OF_INNATE_IMMUNE_RESPONSE	GOBP_POSITIVE_REGULATION_OF_INNATE_IMMUNE_RESPONSE	6/171	139/17872	0.002212872405553	0.0465360493999462	0.0395295810642818	TYROBP/PYCARD/HSP90AA1/FCN1/MNDA/RPS19	6
GOBP_TUMOR_NECROSIS_FACTOR_SUPERFAMILY_CYTOKINE_PRODUCTION	GOBP_TUMOR_NECROSIS_FACTOR_SUPERFAMILY_CYTOKINE_PRODUCTION	GOBP_TUMOR_NECROSIS_FACTOR_SUPERFAMILY_CYTOKINE_PRODUCTION	7/171	188/17872	0.00224473247125751	0.046743252636774	0.0397055877784868	CYBA/TYROBP/TSPO/PYCARD/CD14/CD36/GSTP1	7
GOBP_NEGATIVE_REGULATION_OF_PROTEIN_MODIFICATION_BY_SMALL_PROTEIN_CONJUGATION_OR_REMOVAL	GOBP_NEGATIVE_REGULATION_OF_PROTEIN_MODIFICATION_BY_SMALL_PROTEIN_CONJUGATION_OR_REMOVAL	GOBP_NEGATIVE_REGULATION_OF_PROTEIN_MODIFICATION_BY_SMALL_PROTEIN_CONJUGATION_OR_REMOVAL	5/171	96/17872	0.00229281694605741	0.0472810018779218	0.0401623734853593	RPS15/TSPO/RPS3/RPS20/RPL11	5
GOBP_MATURATION_OF_LSU_RRNA	GOBP_MATURATION_OF_LSU_RRNA	GOBP_MATURATION_OF_LSU_RRNA	3/171	28/17872	0.00236484056282321	0.0482973207253509	0.0410256753510018	RPL7A/RPL10A/RPL7	3
GOBP_POSITIVE_REGULATION_OF_INTERLEUKIN_6_PRODUCTION	GOBP_POSITIVE_REGULATION_OF_INTERLEUKIN_6_PRODUCTION	GOBP_POSITIVE_REGULATION_OF_INTERLEUKIN_6_PRODUCTION	5/171	97/17872	0.00239904000173738	0.0485291520351446	0.0412226021351164	CYBA/TYROBP/AIF1/PYCARD/CD36	5
GOBP_POSITIVE_REGULATION_OF_OXIDOREDUCTASE_ACTIVITY	GOBP_POSITIVE_REGULATION_OF_OXIDOREDUCTASE_ACTIVITY	GOBP_POSITIVE_REGULATION_OF_OXIDOREDUCTASE_ACTIVITY	4/171	59/17872	0.0024451499297483	0.0489952684036357	0.0416185400157754	CYBA/HIF1A/APOE/NDUFA4	4
GOBP_POSITIVE_REGULATION_OF_ENDOCYTOSIS	GOBP_POSITIVE_REGULATION_OF_ENDOCYTOSIS	GOBP_POSITIVE_REGULATION_OF_ENDOCYTOSIS	5/171	98/17872	0.00250879711099404	0.0498007949883303	0.0423027865051036	CD63/APOE/CD14/CD36/PPT1	5
GOBP_REGULATION_OF_PROTEIN_STABILITY	GOBP_REGULATION_OF_PROTEIN_STABILITY	GOBP_REGULATION_OF_PROTEIN_STABILITY	9/171	302/17872	0.00255504361157313	0.050249191027605	0.0426836720295941	TYROBP/SERF2/PFN1/GRN/PYCARD/USP36/RPL11/HSPA8/HSP90AA1	9
GOBP_REGULATION_OF_MYELOID_LEUKOCYTE_MEDIATED_IMMUNITY	GOBP_REGULATION_OF_MYELOID_LEUKOCYTE_MEDIATED_IMMUNITY	GOBP_REGULATION_OF_MYELOID_LEUKOCYTE_MEDIATED_IMMUNITY	4/171	60/17872	0.00260052022937094	0.0506743574970998	0.0430448254286991	TYROBP/VAMP8/ITGB2/STXBP2	4
GOBP_RESPONSE_TO_TOXIC_SUBSTANCE	GOBP_RESPONSE_TO_TOXIC_SUBSTANCE	GOBP_RESPONSE_TO_TOXIC_SUBSTANCE	8/171	247/17872	0.00264687851311378	0.0511088178350334	0.0434138734112634	GPX1/APOE/S100A9/TXNDC17/CD36/SELENOT/GSTP1/MGST3	8
GOBP_POSITIVE_REGULATION_OF_PEPTIDASE_ACTIVITY	GOBP_POSITIVE_REGULATION_OF_PEPTIDASE_ACTIVITY	GOBP_POSITIVE_REGULATION_OF_PEPTIDASE_ACTIVITY	7/171	195/17872	0.00275434715136501	0.0523894942908075	0.0445017311995461	RPS3/RACK1/GRN/PYCARD/S100A9/S100A8/MALT1	7
GOBP_POSITIVE_REGULATION_OF_INTRINSIC_APOPTOTIC_SIGNALING_PATHWAY	GOBP_POSITIVE_REGULATION_OF_INTRINSIC_APOPTOTIC_SIGNALING_PATHWAY	GOBP_POSITIVE_REGULATION_OF_INTRINSIC_APOPTOTIC_SIGNALING_PATHWAY	4/171	61/17872	0.00276253453887497	0.0523894942908075	0.0445017311995461	RPS3/RACK1/S100A9/S100A8	4
GOBP_POSITIVE_REGULATION_OF_CYSTEINE_TYPE_ENDOPEPTIDASE_ACTIVITY	GOBP_POSITIVE_REGULATION_OF_CYSTEINE_TYPE_ENDOPEPTIDASE_ACTIVITY	GOBP_POSITIVE_REGULATION_OF_CYSTEINE_TYPE_ENDOPEPTIDASE_ACTIVITY	6/171	146/17872	0.00282868968857306	0.0531016517844176	0.0451066662496242	RPS3/RACK1/PYCARD/S100A9/S100A8/MALT1	6
GOBP_POSITIVE_REGULATION_OF_IMMUNE_EFFECTOR_PROCESS	GOBP_POSITIVE_REGULATION_OF_IMMUNE_EFFECTOR_PROCESS	GOBP_POSITIVE_REGULATION_OF_IMMUNE_EFFECTOR_PROCESS	8/171	250/17872	0.00285008865509586	0.0531016517844176	0.0451066662496242	TYROBP/VAMP8/ITGB2/STXBP2/FCN1/CD36/RPS19/MALT1	8
GOBP_LIPOPOLYSACCHARIDE_MEDIATED_SIGNALING_PATHWAY	GOBP_LIPOPOLYSACCHARIDE_MEDIATED_SIGNALING_PATHWAY	GOBP_LIPOPOLYSACCHARIDE_MEDIATED_SIGNALING_PATHWAY	4/171	62/17872	0.00293133124247178	0.0541404135566093	0.0459890320329212	CD14/CD36/CARD16/MALT1	4
GOBP_POSITIVE_REGULATION_OF_T_CELL_MIGRATION	GOBP_POSITIVE_REGULATION_OF_T_CELL_MIGRATION	GOBP_POSITIVE_REGULATION_OF_T_CELL_MIGRATION	3/171	31/17872	0.00317741377214768	0.0581795418279455	0.0494200290876691	AIF1/PYCARD/OXSR1	3
GOBP_POSITIVE_REGULATION_OF_PROTEOLYSIS	GOBP_POSITIVE_REGULATION_OF_PROTEOLYSIS	GOBP_POSITIVE_REGULATION_OF_PROTEOLYSIS	10/171	373/17872	0.0032169473808908	0.0583999678377099	0.0496072677539076	RPS3/RACK1/GRN/APOE/PYCARD/S100A9/GABARAP/S100A8/ELOB/MALT1	10
GOBP_REGULATION_OF_CELLULAR_PROTEIN_CATABOLIC_PROCESS	GOBP_REGULATION_OF_CELLULAR_PROTEIN_CATABOLIC_PROCESS	GOBP_REGULATION_OF_CELLULAR_PROTEIN_CATABOLIC_PROCESS	8/171	258/17872	0.00345187618253975	0.0615435074494064	0.0522775159918141	GPX1/RACK1/APOE/RPL11/GABARAP/HSP90AA1/ELOB/EZR	8
GOBP_NEGATIVE_REGULATION_OF_ACTIN_FILAMENT_POLYMERIZATION	GOBP_NEGATIVE_REGULATION_OF_ACTIN_FILAMENT_POLYMERIZATION	GOBP_NEGATIVE_REGULATION_OF_ACTIN_FILAMENT_POLYMERIZATION	4/171	65/17872	0.00347978213763026	0.0615435074494064	0.0522775159918141	TMSB4X/TMSB10/PFN1/CAPG	4
GOBP_MODULATION_BY_HOST_OF_VIRAL_PROCESS	GOBP_MODULATION_BY_HOST_OF_VIRAL_PROCESS	GOBP_MODULATION_BY_HOST_OF_VIRAL_PROCESS	3/171	32/17872	0.00348169377888759	0.0615435074494064	0.0522775159918141	APOE/HSPA8/CFL1	3
GOBP_REGULATION_OF_OXIDOREDUCTASE_ACTIVITY	GOBP_REGULATION_OF_OXIDOREDUCTASE_ACTIVITY	GOBP_REGULATION_OF_OXIDOREDUCTASE_ACTIVITY	5/171	106/17872	0.00352222102141875	0.0615435074494064	0.0522775159918141	CYBA/HIF1A/DDAH2/APOE/NDUFA4	5
GOBP_RESPONSE_TO_REACTIVE_OXYGEN_SPECIES	GOBP_RESPONSE_TO_REACTIVE_OXYGEN_SPECIES	GOBP_RESPONSE_TO_REACTIVE_OXYGEN_SPECIES	7/171	204/17872	0.00353498489116176	0.0615435074494064	0.0522775159918141	GPX1/HIF1A/RPS3/RACK1/APOE/CD36/GSTP1	7
GOBP_POSITIVE_REGULATION_OF_TUMOR_NECROSIS_FACTOR_SUPERFAMILY_CYTOKINE_PRODUCTION	GOBP_POSITIVE_REGULATION_OF_TUMOR_NECROSIS_FACTOR_SUPERFAMILY_CYTOKINE_PRODUCTION	GOBP_POSITIVE_REGULATION_OF_TUMOR_NECROSIS_FACTOR_SUPERFAMILY_CYTOKINE_PRODUCTION	5/171	107/17872	0.00366683802217217	0.0624807506728493	0.0530736478606718	CYBA/TYROBP/PYCARD/CD14/CD36	5
GOBP_TUMOR_NECROSIS_FACTOR_MEDIATED_SIGNALING_PATHWAY	GOBP_TUMOR_NECROSIS_FACTOR_MEDIATED_SIGNALING_PATHWAY	GOBP_TUMOR_NECROSIS_FACTOR_MEDIATED_SIGNALING_PATHWAY	5/171	107/17872	0.00366683802217217	0.0624807506728493	0.0530736478606718	TMSB4X/PYCARD/TXNDC17/CARD16/GSTP1	5
GOBP_LONG_CHAIN_FATTY_ACID_TRANSPORT	GOBP_LONG_CHAIN_FATTY_ACID_TRANSPORT	GOBP_LONG_CHAIN_FATTY_ACID_TRANSPORT	4/171	66/17872	0.00367706866012531	0.0624807506728493	0.0530736478606718	APOE/CD36/SLC27A4/FABP5	4
GOBP_GAS_HOMEOSTASIS	GOBP_GAS_HOMEOSTASIS	GOBP_GAS_HOMEOSTASIS	2/171	10/17872	0.00389420878601042	0.0631396905456956	0.0536333777358124	HIF1A/GSTP1	2
GOBP_POSITIVE_REGULATION_OF_MEMBRANE_DEPOLARIZATION	GOBP_POSITIVE_REGULATION_OF_MEMBRANE_DEPOLARIZATION	GOBP_POSITIVE_REGULATION_OF_MEMBRANE_DEPOLARIZATION	2/171	10/17872	0.00389420878601042	0.0631396905456956	0.0536333777358124	TSPO/RACK1	2
GOBP_POSTSYNAPTIC_ACTIN_CYTOSKELETON_ORGANIZATION	GOBP_POSTSYNAPTIC_ACTIN_CYTOSKELETON_ORGANIZATION	GOBP_POSTSYNAPTIC_ACTIN_CYTOSKELETON_ORGANIZATION	2/171	10/17872	0.00389420878601042	0.0631396905456956	0.0536333777358124	ACTB/ACTG1	2
GOBP_REGULATION_OF_PROTEIN_NEDDYLATION	GOBP_REGULATION_OF_PROTEIN_NEDDYLATION	GOBP_REGULATION_OF_PROTEIN_NEDDYLATION	2/171	10/17872	0.00389420878601042	0.0631396905456956	0.0536333777358124	HIF1A/RPL11	2
GOBP_RESPONSE_TO_LIPOTEICHOIC_ACID	GOBP_RESPONSE_TO_LIPOTEICHOIC_ACID	GOBP_RESPONSE_TO_LIPOTEICHOIC_ACID	2/171	10/17872	0.00389420878601042	0.0631396905456956	0.0536333777358124	CD14/CD36	2
GOBP_SEQUESTERING_OF_ACTIN_MONOMERS	GOBP_SEQUESTERING_OF_ACTIN_MONOMERS	GOBP_SEQUESTERING_OF_ACTIN_MONOMERS	2/171	10/17872	0.00389420878601042	0.0631396905456956	0.0536333777358124	TMSB4X/TMSB10	2
GOBP_AMYLOID_FIBRIL_FORMATION	GOBP_AMYLOID_FIBRIL_FORMATION	GOBP_AMYLOID_FIBRIL_FORMATION	3/171	34/17872	0.00414223090354047	0.0661239163789766	0.0561682984803082	PFDN5/APOE/CD36	3
GOBP_POSITIVE_REGULATION_OF_CELLULAR_PROTEIN_CATABOLIC_PROCESS	GOBP_POSITIVE_REGULATION_OF_CELLULAR_PROTEIN_CATABOLIC_PROCESS	GOBP_POSITIVE_REGULATION_OF_CELLULAR_PROTEIN_CATABOLIC_PROCESS	6/171	158/17872	0.00417165950790153	0.0661239163789766	0.0561682984803082	RACK1/APOE/GABARAP/HSP90AA1/ELOB/EZR	6
GOBP_REGULATION_OF_ACTIN_FILAMENT_LENGTH	GOBP_REGULATION_OF_ACTIN_FILAMENT_LENGTH	GOBP_REGULATION_OF_ACTIN_FILAMENT_LENGTH	6/171	158/17872	0.00417165950790153	0.0661239163789766	0.0561682984803082	TMSB4X/TMSB10/PFN1/PYCARD/ARPC2/CAPG	6
GOBP_CHOLESTEROL_EFFLUX	GOBP_CHOLESTEROL_EFFLUX	GOBP_CHOLESTEROL_EFFLUX	4/171	69/17872	0.00431418686023073	0.0677473272642084	0.0575472885969141	NPC2/APOE/EEPD1/APOC1	4
GOBP_REGULATION_OF_ACTIN_FILAMENT_ORGANIZATION	GOBP_REGULATION_OF_ACTIN_FILAMENT_ORGANIZATION	GOBP_REGULATION_OF_ACTIN_FILAMENT_ORGANIZATION	8/171	268/17872	0.0043378702956367	0.0677473272642084	0.0575472885969141	TMSB4X/TMSB10/PFN1/PYCARD/GMFG/ACTG1/ARPC2/CAPG	8
GOBP_RIBONUCLEOPROTEIN_COMPLEX_SUBUNIT_ORGANIZATION	GOBP_RIBONUCLEOPROTEIN_COMPLEX_SUBUNIT_ORGANIZATION	GOBP_RIBONUCLEOPROTEIN_COMPLEX_SUBUNIT_ORGANIZATION	7/171	214/17872	0.00458886166217792	0.0702518437779941	0.0596747250646655	RPS15/RPS14/RPL3/RPS5/RPL11/HSP90AA1/RPS19	7
GOBP_REGULATION_OF_PEPTIDASE_ACTIVITY	GOBP_REGULATION_OF_PEPTIDASE_ACTIVITY	GOBP_REGULATION_OF_PEPTIDASE_ACTIVITY	11/171	457/17872	0.00460070119284782	0.0702518437779941	0.0596747250646655	GPX1/RPS3/RACK1/GRN/PYCARD/S100A9/CSTB/CST3/S100A8/CARD16/MALT1	11
GOBP_HYPOTONIC_RESPONSE	GOBP_HYPOTONIC_RESPONSE	GOBP_HYPOTONIC_RESPONSE	2/171	11/17872	0.00472976161028868	0.0702518437779941	0.0596747250646655	TSPO/OXSR1	2
GOBP_LYSOSOMAL_LUMEN_ACIDIFICATION	GOBP_LYSOSOMAL_LUMEN_ACIDIFICATION	GOBP_LYSOSOMAL_LUMEN_ACIDIFICATION	2/171	11/17872	0.00472976161028868	0.0702518437779941	0.0596747250646655	GRN/PPT1	2
GOBP_MITOCHONDRIAL_ELECTRON_TRANSPORT_UBIQUINOL_TO_CYTOCHROME_C	GOBP_MITOCHONDRIAL_ELECTRON_TRANSPORT_UBIQUINOL_TO_CYTOCHROME_C	GOBP_MITOCHONDRIAL_ELECTRON_TRANSPORT_UBIQUINOL_TO_CYTOCHROME_C	2/171	11/17872	0.00472976161028868	0.0702518437779941	0.0596747250646655	UQCRB/UQCR10	2
GOBP_RESPONSE_TO_BACTERIAL_LIPOPROTEIN	GOBP_RESPONSE_TO_BACTERIAL_LIPOPROTEIN	GOBP_RESPONSE_TO_BACTERIAL_LIPOPROTEIN	2/171	11/17872	0.00472976161028868	0.0702518437779941	0.0596747250646655	CD14/CD36	2
GOBP_SYNAPSE_PRUNING	GOBP_SYNAPSE_PRUNING	GOBP_SYNAPSE_PRUNING	2/171	11/17872	0.00472976161028868	0.0702518437779941	0.0596747250646655	C1QB/C1QC	2
GOBP_REGULATION_OF_PROTEIN_CATABOLIC_PROCESS	GOBP_REGULATION_OF_PROTEIN_CATABOLIC_PROCESS	GOBP_REGULATION_OF_PROTEIN_CATABOLIC_PROCESS	10/171	395/17872	0.00480652844420888	0.070896294552081	0.0602221473199856	OAZ1/GPX1/RACK1/APOE/RPL11/GABARAP/CST3/HSP90AA1/ELOB/EZR	10
GOBP_CYTOCHROME_COMPLEX_ASSEMBLY	GOBP_CYTOCHROME_COMPLEX_ASSEMBLY	GOBP_CYTOCHROME_COMPLEX_ASSEMBLY	3/171	36/17872	0.00487394203282614	0.0709058416282378	0.0602302569882047	CYBA/TTC19/COX14	3
GOBP_REGULATION_OF_AUTOPHAGY_OF_MITOCHONDRION	GOBP_REGULATION_OF_AUTOPHAGY_OF_MITOCHONDRION	GOBP_REGULATION_OF_AUTOPHAGY_OF_MITOCHONDRION	3/171	36/17872	0.00487394203282614	0.0709058416282378	0.0602302569882047	HIF1A/TSPO/USP36	3
GOBP_CELLULAR_TRANSITION_METAL_ION_HOMEOSTASIS	GOBP_CELLULAR_TRANSITION_METAL_ION_HOMEOSTASIS	GOBP_CELLULAR_TRANSITION_METAL_ION_HOMEOSTASIS	5/171	115/17872	0.00498107698555742	0.0719714797096867	0.061135452583211	FTL/HIF1A/S100A9/S100A8/ATP6V1G1	5
GOBP_NON_MEMBRANE_BOUNDED_ORGANELLE_ASSEMBLY	GOBP_NON_MEMBRANE_BOUNDED_ORGANELLE_ASSEMBLY	GOBP_NON_MEMBRANE_BOUNDED_ORGANELLE_ASSEMBLY	10/171	400/17872	0.00524203498473928	0.0740887988601533	0.0629339881288051	RPS15/RPS14/RPS3/RPL3/RPS5/RPL11/ACTG1/EZR/RPS19/CAPG	10
GOBP_NEUTROPHIL_MEDIATED_IMMUNITY	GOBP_NEUTROPHIL_MEDIATED_IMMUNITY	GOBP_NEUTROPHIL_MEDIATED_IMMUNITY	3/171	37/17872	0.00526714153855139	0.0740887988601533	0.0629339881288051	VAMP8/ITGB2/STXBP2	3
GOBP_POSITIVE_REGULATION_OF_LYMPHOCYTE_MIGRATION	GOBP_POSITIVE_REGULATION_OF_LYMPHOCYTE_MIGRATION	GOBP_POSITIVE_REGULATION_OF_LYMPHOCYTE_MIGRATION	3/171	37/17872	0.00526714153855139	0.0740887988601533	0.0629339881288051	AIF1/PYCARD/OXSR1	3
GOBP_RESPIRATORY_BURST	GOBP_RESPIRATORY_BURST	GOBP_RESPIRATORY_BURST	3/171	37/17872	0.00526714153855139	0.0740887988601533	0.0629339881288051	CYBA/GRN/RPS19	3
GOBP_CELLULAR_RESPONSE_TO_NITROGEN_STARVATION	GOBP_CELLULAR_RESPONSE_TO_NITROGEN_STARVATION	GOBP_CELLULAR_RESPONSE_TO_NITROGEN_STARVATION	2/171	12/17872	0.00564017315633001	0.0777904401561359	0.0660783102525607	GABARAP/MAP1LC3B	2
GOBP_NEGATIVE_REGULATION_OF_LONG_TERM_SYNAPTIC_POTENTIATION	GOBP_NEGATIVE_REGULATION_OF_LONG_TERM_SYNAPTIC_POTENTIATION	GOBP_NEGATIVE_REGULATION_OF_LONG_TERM_SYNAPTIC_POTENTIATION	2/171	12/17872	0.00564017315633001	0.0777904401561359	0.0660783102525607	TYROBP/APOE	2
GOBP_POSTSYNAPTIC_CYTOSKELETON_ORGANIZATION	GOBP_POSTSYNAPTIC_CYTOSKELETON_ORGANIZATION	GOBP_POSTSYNAPTIC_CYTOSKELETON_ORGANIZATION	2/171	12/17872	0.00564017315633001	0.0777904401561359	0.0660783102525607	ACTB/ACTG1	2
GOBP_AMYLOID_BETA_CLEARANCE	GOBP_AMYLOID_BETA_CLEARANCE	GOBP_AMYLOID_BETA_CLEARANCE	3/171	39/17872	0.00610942757593981	0.0833946448958116	0.0708387458377545	APOE/ITGB2/CD36	3
GOBP_ICOSANOID_METABOLIC_PROCESS	GOBP_ICOSANOID_METABOLIC_PROCESS	GOBP_ICOSANOID_METABOLIC_PROCESS	5/171	121/17872	0.00616429343156423	0.0833946448958116	0.0708387458377545	GPX1/LTA4H/FABP5/GSTP1/MGST3	5
GOBP_ORGANELLE_DISASSEMBLY	GOBP_ORGANELLE_DISASSEMBLY	GOBP_ORGANELLE_DISASSEMBLY	5/171	121/17872	0.00616429343156423	0.0833946448958116	0.0708387458377545	HIF1A/TSPO/USP36/GABARAP/MAP1LC3B	5
GOBP_BIOLOGICAL_PROCESS_INVOLVED_IN_SYMBIOTIC_INTERACTION	GOBP_BIOLOGICAL_PROCESS_INVOLVED_IN_SYMBIOTIC_INTERACTION	GOBP_BIOLOGICAL_PROCESS_INVOLVED_IN_SYMBIOTIC_INTERACTION	8/171	287/17872	0.00649378776445289	0.0862225222688185	0.0732408579486346	VAMP8/GPX1/APOE/ANPEP/HSPA8/LGALS1/FCN1/CFL1	8
GOBP_CELLULAR_RESPONSE_TO_MOLECULE_OF_BACTERIAL_ORIGIN	GOBP_CELLULAR_RESPONSE_TO_MOLECULE_OF_BACTERIAL_ORIGIN	GOBP_CELLULAR_RESPONSE_TO_MOLECULE_OF_BACTERIAL_ORIGIN	7/171	229/17872	0.00659383822718438	0.0862225222688185	0.0732408579486346	TSPO/PYCARD/CD14/CD36/CARD16/GSTP1/MALT1	7
GOBP_LEUKOCYTE_AGGREGATION	GOBP_LEUKOCYTE_AGGREGATION	GOBP_LEUKOCYTE_AGGREGATION	2/171	13/17872	0.00662395147218162	0.0862225222688185	0.0732408579486346	S100A9/S100A8	2
GOBP_NEGATIVE_REGULATION_OF_AMYLOID_FIBRIL_FORMATION	GOBP_NEGATIVE_REGULATION_OF_AMYLOID_FIBRIL_FORMATION	GOBP_NEGATIVE_REGULATION_OF_AMYLOID_FIBRIL_FORMATION	2/171	13/17872	0.00662395147218162	0.0862225222688185	0.0732408579486346	PFDN5/APOE	2
GOBP_PHOSPHOLIPID_EFFLUX	GOBP_PHOSPHOLIPID_EFFLUX	GOBP_PHOSPHOLIPID_EFFLUX	2/171	13/17872	0.00662395147218162	0.0862225222688185	0.0732408579486346	APOE/APOC1	2
GOBP_POSITIVE_REGULATION_OF_DEFENSE_RESPONSE_TO_BACTERIUM	GOBP_POSITIVE_REGULATION_OF_DEFENSE_RESPONSE_TO_BACTERIUM	GOBP_POSITIVE_REGULATION_OF_DEFENSE_RESPONSE_TO_BACTERIUM	2/171	13/17872	0.00662395147218162	0.0862225222688185	0.0732408579486346	CYBA/GRN	2
GOBP_REGULATION_OF_CELLULAR_COMPONENT_SIZE	GOBP_REGULATION_OF_CELLULAR_COMPONENT_SIZE	GOBP_REGULATION_OF_CELLULAR_COMPONENT_SIZE	9/171	350/17872	0.00665748288704625	0.0862225222688185	0.0732408579486346	TMSB4X/TMSB10/PFN1/APOE/PYCARD/LAMTOR4/EZR/ARPC2/CAPG	9
GOBP_MYELOID_LEUKOCYTE_MIGRATION	GOBP_MYELOID_LEUKOCYTE_MIGRATION	GOBP_MYELOID_LEUKOCYTE_MIGRATION	7/171	230/17872	0.00674746420856865	0.0868582665393928	0.073780884551749	AIF1/ITGB2/S100A9/FCER1G/S100A8/RPS19/CD9	7
GOBP_NEURON_DEATH	GOBP_NEURON_DEATH	GOBP_NEURON_DEATH	9/171	352/17872	0.00690017602121434	0.0882889992112003	0.0749962060897995	TYROBP/GPX1/HIF1A/RACK1/GRN/APOE/ITGB2/PPT1/INPP5A	9
GOBP_POSITIVE_REGULATION_OF_SUPRAMOLECULAR_FIBER_ORGANIZATION	GOBP_POSITIVE_REGULATION_OF_SUPRAMOLECULAR_FIBER_ORGANIZATION	GOBP_POSITIVE_REGULATION_OF_SUPRAMOLECULAR_FIBER_ORGANIZATION	6/171	176/17872	0.00699919126984186	0.0890196542343959	0.0756168536811153	GPX1/PFN1/RPS3/APOE/PYCARD/ARPC2	6
GOBP_RESPONSE_TO_MOLECULE_OF_BACTERIAL_ORIGIN	GOBP_RESPONSE_TO_MOLECULE_OF_BACTERIAL_ORIGIN	GOBP_RESPONSE_TO_MOLECULE_OF_BACTERIAL_ORIGIN	9/171	354/17872	0.00714961078481409	0.0903915077794353	0.0767821609346576	TSPO/PYCARD/S100A9/CD14/S100A8/CD36/CARD16/GSTP1/MALT1	9
GOBP_REGULATION_OF_IMMUNE_EFFECTOR_PROCESS	GOBP_REGULATION_OF_IMMUNE_EFFECTOR_PROCESS	GOBP_REGULATION_OF_IMMUNE_EFFECTOR_PROCESS	9/171	355/17872	0.00727689356650715	0.0904178399788294	0.0768045285576934	TYROBP/VAMP8/GRN/ITGB2/STXBP2/FCN1/CD36/RPS19/MALT1	9
GOBP_NEGATIVE_REGULATION_OF_PROTEIN_POLYMERIZATION	GOBP_NEGATIVE_REGULATION_OF_PROTEIN_POLYMERIZATION	GOBP_NEGATIVE_REGULATION_OF_PROTEIN_POLYMERIZATION	4/171	80/17872	0.00727940237117695	0.0904178399788294	0.0768045285576934	TMSB4X/TMSB10/PFN1/CAPG	4
GOBP_REGULATION_OF_STEROL_TRANSPORT	GOBP_REGULATION_OF_STEROL_TRANSPORT	GOBP_REGULATION_OF_STEROL_TRANSPORT	4/171	80/17872	0.00727940237117695	0.0904178399788294	0.0768045285576934	TSPO/APOE/EEPD1/APOC1	4
GOBP_POSITIVE_REGULATION_OF_PROTEIN_CATABOLIC_PROCESS	GOBP_POSITIVE_REGULATION_OF_PROTEIN_CATABOLIC_PROCESS	GOBP_POSITIVE_REGULATION_OF_PROTEIN_CATABOLIC_PROCESS	7/171	234/17872	0.00738872583378571	0.0912421725055863	0.0775047495661488	OAZ1/RACK1/APOE/GABARAP/HSP90AA1/ELOB/EZR	7
GOBP_REGULATION_OF_NITRIC_OXIDE_SYNTHASE_ACTIVITY	GOBP_REGULATION_OF_NITRIC_OXIDE_SYNTHASE_ACTIVITY	GOBP_REGULATION_OF_NITRIC_OXIDE_SYNTHASE_ACTIVITY	3/171	42/17872	0.00751581625620831	0.0916377845486316	0.0778407982537192	HIF1A/DDAH2/APOE	3
GOBP_TOR_SIGNALING	GOBP_TOR_SIGNALING	GOBP_TOR_SIGNALING	5/171	127/17872	0.00753253412260706	0.0916377845486316	0.0778407982537192	HIF1A/RPS6/LAMTOR2/GPAT3/LAMTOR4	5
GOBP_ACTIVATION_OF_CYSTEINE_TYPE_ENDOPEPTIDASE_ACTIVITY_INVOLVED_IN_APOPTOTIC_PROCESS	GOBP_ACTIVATION_OF_CYSTEINE_TYPE_ENDOPEPTIDASE_ACTIVITY_INVOLVED_IN_APOPTOTIC_PROCESS	GOBP_ACTIVATION_OF_CYSTEINE_TYPE_ENDOPEPTIDASE_ACTIVITY_INVOLVED_IN_APOPTOTIC_PROCESS	4/171	81/17872	0.00760155733444049	0.0916377845486316	0.0778407982537192	RACK1/PYCARD/S100A9/S100A8	4
GOBP_GROWTH_HORMONE_SECRETION	GOBP_GROWTH_HORMONE_SECRETION	GOBP_GROWTH_HORMONE_SECRETION	2/171	14/17872	0.0076796260120793	0.0916377845486316	0.0778407982537192	SELENOT/SERP1	2
GOBP_MUCUS_SECRETION	GOBP_MUCUS_SECRETION	GOBP_MUCUS_SECRETION	2/171	14/17872	0.0076796260120793	0.0916377845486316	0.0778407982537192	CYBA/VAMP8	2
GOBP_REGULATION_OF_CHOLESTEROL_ESTERIFICATION	GOBP_REGULATION_OF_CHOLESTEROL_ESTERIFICATION	GOBP_REGULATION_OF_CHOLESTEROL_ESTERIFICATION	2/171	14/17872	0.0076796260120793	0.0916377845486316	0.0778407982537192	APOE/APOC1	2
GOBP_LEUKOCYTE_CHEMOTAXIS	GOBP_LEUKOCYTE_CHEMOTAXIS	GOBP_LEUKOCYTE_CHEMOTAXIS	7/171	236/17872	0.00772579127721217	0.0916736350435679	0.0778712510975693	AIF1/ITGB2/S100A9/FCER1G/S100A8/RPS19/OXSR1	7
GOBP_ASTROCYTE_DEVELOPMENT	GOBP_ASTROCYTE_DEVELOPMENT	GOBP_ASTROCYTE_DEVELOPMENT	3/171	43/17872	0.0080235198801224	0.0946775345854444	0.0804228834767824	GRN/S100A9/S100A8	3
GOBP_RESPONSE_TO_AXON_INJURY	GOBP_RESPONSE_TO_AXON_INJURY	GOBP_RESPONSE_TO_AXON_INJURY	4/171	83/17872	0.00827372367954207	0.0970905474881069	0.0824725931185525	TYROBP/TSPO/AIF1/GRN	4
GOBP_POSITIVE_REGULATION_OF_SECRETION	GOBP_POSITIVE_REGULATION_OF_SECRETION	GOBP_POSITIVE_REGULATION_OF_SECRETION	8/171	300/17872	0.00838163040542302	0.097161717186154	0.082533047505733	CYBA/VAMP8/HIF1A/ITGB2/S100A8/EZR/SELENOT/SERP1	8
GOBP_REGULATION_OF_LIPID_LOCALIZATION	GOBP_REGULATION_OF_LIPID_LOCALIZATION	GOBP_REGULATION_OF_LIPID_LOCALIZATION	6/171	183/17872	0.00840557844283805	0.097161717186154	0.082533047505733	TSPO/APOE/EEPD1/APOC1/DBI/CD36	6
GOBP_REGULATION_OF_T_CELL_MIGRATION	GOBP_REGULATION_OF_T_CELL_MIGRATION	GOBP_REGULATION_OF_T_CELL_MIGRATION	3/171	44/17872	0.00855097215256932	0.097161717186154	0.082533047505733	AIF1/PYCARD/OXSR1	3
GOBP_REGULATION_OF_T_CELL_RECEPTOR_SIGNALING_PATHWAY	GOBP_REGULATION_OF_T_CELL_RECEPTOR_SIGNALING_PATHWAY	GOBP_REGULATION_OF_T_CELL_RECEPTOR_SIGNALING_PATHWAY	3/171	44/17872	0.00855097215256932	0.097161717186154	0.082533047505733	RPS3/EZR/MALT1	3
GOBP_SUBSTANTIA_NIGRA_DEVELOPMENT	GOBP_SUBSTANTIA_NIGRA_DEVELOPMENT	GOBP_SUBSTANTIA_NIGRA_DEVELOPMENT	3/171	44/17872	0.00855097215256932	0.097161717186154	0.082533047505733	ACTB/DYNLL1/COX6B1	3
GOBP_PLATELET_ACTIVATION	GOBP_PLATELET_ACTIVATION	GOBP_PLATELET_ACTIVATION	5/171	131/17872	0.00855425664492034	0.097161717186154	0.082533047505733	ACTB/APOE/FCER1G/ACTG1/CD9	5
GOBP_MEMBRANE_DOCKING	GOBP_MEMBRANE_DOCKING	GOBP_MEMBRANE_DOCKING	4/171	84/17872	0.00862394436098789	0.0974135802511182	0.0827469900636419	VAMP8/STXBP2/EZR/STX3	4
GOBP_PENTOSE_PHOSPHATE_SHUNT	GOBP_PENTOSE_PHOSPHATE_SHUNT	GOBP_PENTOSE_PHOSPHATE_SHUNT	2/171	15/17872	0.00880574736733272	0.0974135802511182	0.0827469900636419	TKT/TALDO1	2
GOBP_REGULATION_OF_NEUTROPHIL_ACTIVATION	GOBP_REGULATION_OF_NEUTROPHIL_ACTIVATION	GOBP_REGULATION_OF_NEUTROPHIL_ACTIVATION	2/171	15/17872	0.00880574736733272	0.0974135802511182	0.0827469900636419	GRN/ITGB2	2
GOBP_REGULATION_OF_PHOSPHOLIPID_TRANSPORT	GOBP_REGULATION_OF_PHOSPHOLIPID_TRANSPORT	GOBP_REGULATION_OF_PHOSPHOLIPID_TRANSPORT	2/171	15/17872	0.00880574736733272	0.0974135802511182	0.0827469900636419	APOE/DBI	2
GOBP_RESPIRATORY_BURST_INVOLVED_IN_DEFENSE_RESPONSE	GOBP_RESPIRATORY_BURST_INVOLVED_IN_DEFENSE_RESPONSE	GOBP_RESPIRATORY_BURST_INVOLVED_IN_DEFENSE_RESPONSE	2/171	15/17872	0.00880574736733272	0.0974135802511182	0.0827469900636419	GRN/RPS19	2
GOBP_POSITIVE_REGULATION_OF_APOPTOTIC_SIGNALING_PATHWAY	GOBP_POSITIVE_REGULATION_OF_APOPTOTIC_SIGNALING_PATHWAY	GOBP_POSITIVE_REGULATION_OF_APOPTOTIC_SIGNALING_PATHWAY	5/171	134/17872	0.00938086865798767	0.103238160774952	0.0876946216514364	RPS3/RACK1/PYCARD/S100A9/S100A8	5
GOBP_PROTEIN_LOCALIZATION_TO_LYSOSOME	GOBP_PROTEIN_LOCALIZATION_TO_LYSOSOME	GOBP_PROTEIN_LOCALIZATION_TO_LYSOSOME	3/171	46/17872	0.00966575659978998	0.103656053547887	0.0880495964818511	HSPA8/LAMTOR4/ZFYVE16	3
GOBP_VASCULAR_TRANSPORT	GOBP_VASCULAR_TRANSPORT	GOBP_VASCULAR_TRANSPORT	4/171	87/17872	0.00973237208224834	0.103656053547887	0.0880495964818511	APOE/CD36/SLC27A4/FABP5	4
GOBP_CARBOHYDRATE_HOMEOSTASIS	GOBP_CARBOHYDRATE_HOMEOSTASIS	GOBP_CARBOHYDRATE_HOMEOSTASIS	7/171	247/17872	0.00978646864979478	0.103656053547887	0.0880495964818511	CYBA/GPX1/HIF1A/RACK1/RPS6/FABP5/SELENOT	7
GOBP_ALDEHYDE_BIOSYNTHETIC_PROCESS	GOBP_ALDEHYDE_BIOSYNTHETIC_PROCESS	GOBP_ALDEHYDE_BIOSYNTHETIC_PROCESS	2/171	16/17872	0.0100008870003531	0.103656053547887	0.0880495964818511	TKT/TPI1	2
GOBP_CHAPERONE_MEDIATED_AUTOPHAGY	GOBP_CHAPERONE_MEDIATED_AUTOPHAGY	GOBP_CHAPERONE_MEDIATED_AUTOPHAGY	2/171	16/17872	0.0100008870003531	0.103656053547887	0.0880495964818511	HSPA8/HSP90AA1	2
GOBP_HIGH_DENSITY_LIPOPROTEIN_PARTICLE_REMODELING	GOBP_HIGH_DENSITY_LIPOPROTEIN_PARTICLE_REMODELING	GOBP_HIGH_DENSITY_LIPOPROTEIN_PARTICLE_REMODELING	2/171	16/17872	0.0100008870003531	0.103656053547887	0.0880495964818511	APOE/APOC1	2
GOBP_LIPOPROTEIN_CATABOLIC_PROCESS	GOBP_LIPOPROTEIN_CATABOLIC_PROCESS	GOBP_LIPOPROTEIN_CATABOLIC_PROCESS	2/171	16/17872	0.0100008870003531	0.103656053547887	0.0880495964818511	APOE/PPT1	2
GOBP_NUCLEOLUS_ORGANIZATION	GOBP_NUCLEOLUS_ORGANIZATION	GOBP_NUCLEOLUS_ORGANIZATION	2/171	16/17872	0.0100008870003531	0.103656053547887	0.0880495964818511	USP36/RPS19	2
GOBP_PROTEIN_NITROSYLATION	GOBP_PROTEIN_NITROSYLATION	GOBP_PROTEIN_NITROSYLATION	2/171	16/17872	0.0100008870003531	0.103656053547887	0.0880495964818511	S100A9/S100A8	2
GOBP_REGULATION_OF_AMYLOID_FIBRIL_FORMATION	GOBP_REGULATION_OF_AMYLOID_FIBRIL_FORMATION	GOBP_REGULATION_OF_AMYLOID_FIBRIL_FORMATION	2/171	16/17872	0.0100008870003531	0.103656053547887	0.0880495964818511	PFDN5/APOE	2
GOBP_REGULATION_OF_LYSOSOMAL_LUMEN_PH	GOBP_REGULATION_OF_LYSOSOMAL_LUMEN_PH	GOBP_REGULATION_OF_LYSOSOMAL_LUMEN_PH	2/171	16/17872	0.0100008870003531	0.103656053547887	0.0880495964818511	GRN/PPT1	2
GOBP_REGULATION_OF_PROTEASOMAL_PROTEIN_CATABOLIC_PROCESS	GOBP_REGULATION_OF_PROTEASOMAL_PROTEIN_CATABOLIC_PROCESS	GOBP_REGULATION_OF_PROTEASOMAL_PROTEIN_CATABOLIC_PROCESS	6/171	190/17872	0.0100044684450645	0.103656053547887	0.0880495964818511	GPX1/RACK1/APOE/RPL11/GABARAP/ELOB	6
GOBP_MACROAUTOPHAGY	GOBP_MACROAUTOPHAGY	GOBP_MACROAUTOPHAGY	8/171	310/17872	0.0100936323686723	0.104072209471165	0.08840309596272	VAMP8/HIF1A/ATP6V0E1/USP36/GABARAP/ATP6V0B/MAP1LC3B/ATP6V1G1	8
GOBP_PROTEIN_STABILIZATION	GOBP_PROTEIN_STABILIZATION	GOBP_PROTEIN_STABILIZATION	6/171	191/17872	0.0102493700748602	0.10470278715433	0.0889387338599076	TYROBP/PFN1/GRN/USP36/RPL11/HSP90AA1	6
GOBP_PH_REDUCTION	GOBP_PH_REDUCTION	GOBP_PH_REDUCTION	3/171	47/17872	0.0102533802862997	0.10470278715433	0.0889387338599076	GRN/ATP6V0E1/PPT1	3
GOBP_REGULATION_OF_PLATELET_ACTIVATION	GOBP_REGULATION_OF_PLATELET_ACTIVATION	GOBP_REGULATION_OF_PLATELET_ACTIVATION	3/171	48/17872	0.01086133610034	0.110025262605054	0.0934598573223625	APOE/FCER1G/CD9	3
GOBP_TRANSITION_METAL_ION_HOMEOSTASIS	GOBP_TRANSITION_METAL_ION_HOMEOSTASIS	GOBP_TRANSITION_METAL_ION_HOMEOSTASIS	5/171	139/17872	0.0108782039298783	0.110025262605054	0.0934598573223625	FTL/HIF1A/S100A9/S100A8/ATP6V1G1	5
GOBP_CELL_CHEMOTAXIS	GOBP_CELL_CHEMOTAXIS	GOBP_CELL_CHEMOTAXIS	8/171	315/17872	0.0110412721468908	0.1111453177251	0.0944112769257712	TMSB4X/AIF1/ITGB2/S100A9/FCER1G/S100A8/RPS19/OXSR1	8
GOBP_LEUKOCYTE_CELL_CELL_ADHESION	GOBP_LEUKOCYTE_CELL_CELL_ADHESION	GOBP_LEUKOCYTE_CELL_CELL_ADHESION	9/171	381/17872	0.0112376603018769	0.111794228735137	0.094962487883846	RPS3/AIF1/PYCARD/ITGB2/S100A9/LGALS1/S100A8/EZR/MALT1	9
GOBP_CHRONIC_INFLAMMATORY_RESPONSE	GOBP_CHRONIC_INFLAMMATORY_RESPONSE	GOBP_CHRONIC_INFLAMMATORY_RESPONSE	2/171	17/17872	0.0112636369817887	0.111794228735137	0.094962487883846	S100A9/S100A8	2
GOBP_INFLAMMATORY_RESPONSE_TO_WOUNDING	GOBP_INFLAMMATORY_RESPONSE_TO_WOUNDING	GOBP_INFLAMMATORY_RESPONSE_TO_WOUNDING	2/171	17/17872	0.0112636369817887	0.111794228735137	0.094962487883846	HIF1A/GRN	2
GOBP_DENDRITIC_CELL_DIFFERENTIATION	GOBP_DENDRITIC_CELL_DIFFERENTIATION	GOBP_DENDRITIC_CELL_DIFFERENTIATION	3/171	49/17872	0.0114897453493854	0.112461839272325	0.0955295829679676	LGALS1/TMEM176B/TMEM176A	3
GOBP_INTERMEMBRANE_LIPID_TRANSFER	GOBP_INTERMEMBRANE_LIPID_TRANSFER	GOBP_INTERMEMBRANE_LIPID_TRANSFER	3/171	49/17872	0.0114897453493854	0.112461839272325	0.0955295829679676	NPC2/TSPO/APOE	3
GOBP_REGULATION_OF_LEUKOCYTE_DEGRANULATION	GOBP_REGULATION_OF_LEUKOCYTE_DEGRANULATION	GOBP_REGULATION_OF_LEUKOCYTE_DEGRANULATION	3/171	49/17872	0.0114897453493854	0.112461839272325	0.0955295829679676	VAMP8/ITGB2/STXBP2	3
GOBP_CELLULAR_RESPONSE_TO_BIOTIC_STIMULUS	GOBP_CELLULAR_RESPONSE_TO_BIOTIC_STIMULUS	GOBP_CELLULAR_RESPONSE_TO_BIOTIC_STIMULUS	7/171	256/17872	0.0117505387804432	0.114231048661613	0.097032420163547	TSPO/PYCARD/CD14/CD36/CARD16/GSTP1/MALT1	7
GOBP_MAINTENANCE_OF_PROTEIN_LOCATION	GOBP_MAINTENANCE_OF_PROTEIN_LOCATION	GOBP_MAINTENANCE_OF_PROTEIN_LOCATION	4/171	92/17872	0.0117780601021155	0.114231048661613	0.097032420163547	TMSB4X/TMSB10/TSPO/YWHAB	4
GOBP_LEUKOCYTE_MIGRATION	GOBP_LEUKOCYTE_MIGRATION	GOBP_LEUKOCYTE_MIGRATION	9/171	385/17872	0.0119677579768472	0.115020443180197	0.0977029634308937	AIF1/PYCARD/ITGB2/S100A9/FCER1G/S100A8/RPS19/OXSR1/CD9	9
GOBP_REGULATION_OF_BODY_FLUID_LEVELS	GOBP_REGULATION_OF_BODY_FLUID_LEVELS	GOBP_REGULATION_OF_BODY_FLUID_LEVELS	9/171	385/17872	0.0119677579768472	0.115020443180197	0.0977029634308937	CYBA/VAMP8/HIF1A/ACTB/APOE/FCER1G/ACTG1/CD36/CD9	9
GOBP_REGULATION_OF_MITOCHONDRION_ORGANIZATION	GOBP_REGULATION_OF_MITOCHONDRION_ORGANIZATION	GOBP_REGULATION_OF_MITOCHONDRION_ORGANIZATION	5/171	143/17872	0.0121878821341868	0.115287513224469	0.0979298234050649	GPX1/HIF1A/TSPO/PYCARD/USP36	5
GOBP_POSITIVE_REGULATION_OF_PEPTIDE_SECRETION	GOBP_POSITIVE_REGULATION_OF_PEPTIDE_SECRETION	GOBP_POSITIVE_REGULATION_OF_PEPTIDE_SECRETION	4/171	93/17872	0.0122177627644737	0.115287513224469	0.0979298234050649	HIF1A/S100A8/SELENOT/SERP1	4
GOBP_ESTABLISHMENT_OF_PROTEIN_LOCALIZATION_TO_MEMBRANE	GOBP_ESTABLISHMENT_OF_PROTEIN_LOCALIZATION_TO_MEMBRANE	GOBP_ESTABLISHMENT_OF_PROTEIN_LOCALIZATION_TO_MEMBRANE	7/171	259/17872	0.0124645037156979	0.115287513224469	0.0979298234050649	RACK1/SRP14/ITGB2/NACA/HSP90AA1/STX3/SEC62	7
GOBP_NIK_NF_KAPPAB_SIGNALING	GOBP_NIK_NF_KAPPAB_SIGNALING	GOBP_NIK_NF_KAPPAB_SIGNALING	5/171	144/17872	0.0125312931389676	0.115287513224469	0.0979298234050649	TMSB4X/RPS3/CD14/EZR/MALT1	5
GOBP_LIPID_IMPORT_INTO_CELL	GOBP_LIPID_IMPORT_INTO_CELL	GOBP_LIPID_IMPORT_INTO_CELL	2/171	18/17872	0.012592609730733	0.115287513224469	0.0979298234050649	CD36/SLC27A4	2
GOBP_MACROPHAGE_ACTIVATION_INVOLVED_IN_IMMUNE_RESPONSE	GOBP_MACROPHAGE_ACTIVATION_INVOLVED_IN_IMMUNE_RESPONSE	GOBP_MACROPHAGE_ACTIVATION_INVOLVED_IN_IMMUNE_RESPONSE	2/171	18/17872	0.012592609730733	0.115287513224469	0.0979298234050649	TYROBP/GRN	2
GOBP_NADPH_REGENERATION	GOBP_NADPH_REGENERATION	GOBP_NADPH_REGENERATION	2/171	18/17872	0.012592609730733	0.115287513224469	0.0979298234050649	TKT/TALDO1	2
GOBP_NEGATIVE_REGULATION_OF_B_CELL_PROLIFERATION	GOBP_NEGATIVE_REGULATION_OF_B_CELL_PROLIFERATION	GOBP_NEGATIVE_REGULATION_OF_B_CELL_PROLIFERATION	2/171	18/17872	0.012592609730733	0.115287513224469	0.0979298234050649	TYROBP/MNDA	2
GOBP_PROTEIN_NEDDYLATION	GOBP_PROTEIN_NEDDYLATION	GOBP_PROTEIN_NEDDYLATION	2/171	18/17872	0.012592609730733	0.115287513224469	0.0979298234050649	HIF1A/RPL11	2
GOBP_REGULATION_OF_RESPIRATORY_BURST	GOBP_REGULATION_OF_RESPIRATORY_BURST	GOBP_REGULATION_OF_RESPIRATORY_BURST	2/171	18/17872	0.012592609730733	0.115287513224469	0.0979298234050649	GRN/RPS19	2
GOBP_STEROID_ESTERIFICATION	GOBP_STEROID_ESTERIFICATION	GOBP_STEROID_ESTERIFICATION	2/171	18/17872	0.012592609730733	0.115287513224469	0.0979298234050649	APOE/APOC1	2
GOBP_APOPTOTIC_CELL_CLEARANCE	GOBP_APOPTOTIC_CELL_CLEARANCE	GOBP_APOPTOTIC_CELL_CLEARANCE	3/171	52/17872	0.0134987673248264	0.122927739626184	0.104419737198572	TYROBP/FCN1/CD36	3
GOBP_PROTEIN_LOCALIZATION_TO_CELL_JUNCTION	GOBP_PROTEIN_LOCALIZATION_TO_CELL_JUNCTION	GOBP_PROTEIN_LOCALIZATION_TO_CELL_JUNCTION	4/171	96/17872	0.0135995297470577	0.122927739626184	0.104419737198572	ACTB/LAMTOR2/ACTG1/STX3	4
GOBP_ORGANOPHOSPHATE_ESTER_TRANSPORT	GOBP_ORGANOPHOSPHATE_ESTER_TRANSPORT	GOBP_ORGANOPHOSPHATE_ESTER_TRANSPORT	5/171	147/17872	0.0136007621526145	0.122927739626184	0.104419737198572	NPC2/APOE/APOC1/DBI/SLC25A6	5
GOBP_POSITIVE_REGULATION_OF_DNA_BINDING_TRANSCRIPTION_FACTOR_ACTIVITY	GOBP_POSITIVE_REGULATION_OF_DNA_BINDING_TRANSCRIPTION_FACTOR_ACTIVITY	GOBP_POSITIVE_REGULATION_OF_DNA_BINDING_TRANSCRIPTION_FACTOR_ACTIVITY	7/171	264/17872	0.0137232572718738	0.123509315446864	0.104913750954468	RPS3/PYCARD/S100A9/S100A8/CD36/CARD16/MALT1	7
GOBP_CELLULAR_RESPONSE_TO_CARBOHYDRATE_STIMULUS	GOBP_CELLULAR_RESPONSE_TO_CARBOHYDRATE_STIMULUS	GOBP_CELLULAR_RESPONSE_TO_CARBOHYDRATE_STIMULUS	5/171	148/17872	0.0139705042431979	0.124297881999714	0.105583590914615	CYBA/GPX1/HIF1A/RACK1/SELENOT	5
GOBP_LEUKOCYTE_MIGRATION_INVOLVED_IN_INFLAMMATORY_RESPONSE	GOBP_LEUKOCYTE_MIGRATION_INVOLVED_IN_INFLAMMATORY_RESPONSE	GOBP_LEUKOCYTE_MIGRATION_INVOLVED_IN_INFLAMMATORY_RESPONSE	2/171	19/17872	0.0139864377579716	0.124297881999714	0.105583590914615	S100A9/S100A8	2
GOBP_NEGATIVE_REGULATION_OF_PLATELET_ACTIVATION	GOBP_NEGATIVE_REGULATION_OF_PLATELET_ACTIVATION	GOBP_NEGATIVE_REGULATION_OF_PLATELET_ACTIVATION	2/171	19/17872	0.0139864377579716	0.124297881999714	0.105583590914615	APOE/CD9	2
GOBP_PLASMA_LIPOPROTEIN_PARTICLE_CLEARANCE	GOBP_PLASMA_LIPOPROTEIN_PARTICLE_CLEARANCE	GOBP_PLASMA_LIPOPROTEIN_PARTICLE_CLEARANCE	3/171	53/17872	0.0142100189318634	0.124719339716025	0.105941593950474	APOE/APOC1/CD36	3
GOBP_POSITIVE_REGULATION_OF_ACTIN_FILAMENT_POLYMERIZATION	GOBP_POSITIVE_REGULATION_OF_ACTIN_FILAMENT_POLYMERIZATION	GOBP_POSITIVE_REGULATION_OF_ACTIN_FILAMENT_POLYMERIZATION	3/171	53/17872	0.0142100189318634	0.124719339716025	0.105941593950474	PFN1/PYCARD/ARPC2	3
GOBP_RESPONSE_TO_ZINC_ION	GOBP_RESPONSE_TO_ZINC_ION	GOBP_RESPONSE_TO_ZINC_ION	3/171	53/17872	0.0142100189318634	0.124719339716025	0.105941593950474	TSPO/LTA4H/S100A8	3
GOBP_LEUKOCYTE_PROLIFERATION	GOBP_LEUKOCYTE_PROLIFERATION	GOBP_LEUKOCYTE_PROLIFERATION	8/171	331/17872	0.014518308696973	0.126863011475478	0.107762514455828	TYROBP/RPS3/AIF1/RPS6/PYCARD/MNDA/GSTP1/MALT1	8
GOBP_CHEMOKINE_PRODUCTION	GOBP_CHEMOKINE_PRODUCTION	GOBP_CHEMOKINE_PRODUCTION	4/171	98/17872	0.0145737169491604	0.126863011475478	0.107762514455828	HIF1A/AIF1/PYCARD/GSTP1	4
GOBP_NEGATIVE_REGULATION_OF_OXIDATIVE_STRESS_INDUCED_CELL_DEATH	GOBP_NEGATIVE_REGULATION_OF_OXIDATIVE_STRESS_INDUCED_CELL_DEATH	GOBP_NEGATIVE_REGULATION_OF_OXIDATIVE_STRESS_INDUCED_CELL_DEATH	3/171	54/17872	0.0149421940084098	0.129539673770867	0.110036178433574	GPX1/HIF1A/RACK1	3
GOBP_FATTY_ACID_TRANSPORT	GOBP_FATTY_ACID_TRANSPORT	GOBP_FATTY_ACID_TRANSPORT	4/171	99/17872	0.0150769405663673	0.129654445563584	0.110133670183359	APOE/CD36/SLC27A4/FABP5	4
GOBP_CELLULAR_RESPONSE_TO_CHEMICAL_STRESS	GOBP_CELLULAR_RESPONSE_TO_CHEMICAL_STRESS	GOBP_CELLULAR_RESPONSE_TO_CHEMICAL_STRESS	8/171	334/17872	0.0152500851534303	0.129654445563584	0.110133670183359	GPX1/HIF1A/TSPO/RPS3/AIF1/RACK1/CD36/OXSR1	8
GOBP_NEGATIVE_REGULATION_OF_NEURON_DEATH	GOBP_NEGATIVE_REGULATION_OF_NEURON_DEATH	GOBP_NEGATIVE_REGULATION_OF_NEURON_DEATH	6/171	209/17872	0.0154177562356249	0.129654445563584	0.110133670183359	HIF1A/RACK1/GRN/APOE/PPT1/INPP5A	6
GOBP_NEGATIVE_REGULATION_OF_OXIDATIVE_STRESS_INDUCED_INTRINSIC_APOPTOTIC_SIGNALING_PATHWAY	GOBP_NEGATIVE_REGULATION_OF_OXIDATIVE_STRESS_INDUCED_INTRINSIC_APOPTOTIC_SIGNALING_PATHWAY	GOBP_NEGATIVE_REGULATION_OF_OXIDATIVE_STRESS_INDUCED_INTRINSIC_APOPTOTIC_SIGNALING_PATHWAY	2/171	20/17872	0.0154437734122348	0.129654445563584	0.110133670183359	GPX1/HIF1A	2
GOBP_NEGATIVE_REGULATION_OF_OXIDATIVE_STRESS_INDUCED_NEURON_DEATH	GOBP_NEGATIVE_REGULATION_OF_OXIDATIVE_STRESS_INDUCED_NEURON_DEATH	GOBP_NEGATIVE_REGULATION_OF_OXIDATIVE_STRESS_INDUCED_NEURON_DEATH	2/171	20/17872	0.0154437734122348	0.129654445563584	0.110133670183359	HIF1A/RACK1	2
GOBP_POSITIVE_REGULATION_OF_MYELOID_LEUKOCYTE_MEDIATED_IMMUNITY	GOBP_POSITIVE_REGULATION_OF_MYELOID_LEUKOCYTE_MEDIATED_IMMUNITY	GOBP_POSITIVE_REGULATION_OF_MYELOID_LEUKOCYTE_MEDIATED_IMMUNITY	2/171	20/17872	0.0154437734122348	0.129654445563584	0.110133670183359	TYROBP/ITGB2	2
GOBP_POSITIVE_REGULATION_OF_PROTEIN_LOCALIZATION_TO_CELL_SURFACE	GOBP_POSITIVE_REGULATION_OF_PROTEIN_LOCALIZATION_TO_CELL_SURFACE	GOBP_POSITIVE_REGULATION_OF_PROTEIN_LOCALIZATION_TO_CELL_SURFACE	2/171	20/17872	0.0154437734122348	0.129654445563584	0.110133670183359	TYROBP/STX3	2
GOBP_REGULATION_OF_DEFENSE_RESPONSE_TO_BACTERIUM	GOBP_REGULATION_OF_DEFENSE_RESPONSE_TO_BACTERIUM	GOBP_REGULATION_OF_DEFENSE_RESPONSE_TO_BACTERIUM	2/171	20/17872	0.0154437734122348	0.129654445563584	0.110133670183359	CYBA/GRN	2
GOBP_ALCOHOL_CATABOLIC_PROCESS	GOBP_ALCOHOL_CATABOLIC_PROCESS	GOBP_ALCOHOL_CATABOLIC_PROCESS	3/171	55/17872	0.0156953607126245	0.131247819502419	0.111487145716695	APOE/INPP5A/TPI1	3
GOBP_REGULATION_OF_LIPID_TRANSPORT	GOBP_REGULATION_OF_LIPID_TRANSPORT	GOBP_REGULATION_OF_LIPID_TRANSPORT	5/171	153/17872	0.0159208804042147	0.132113059226116	0.11222211493387	TSPO/APOE/EEPD1/APOC1/DBI	5
GOBP_NEGATIVE_REGULATION_OF_TRANSFERASE_ACTIVITY	GOBP_NEGATIVE_REGULATION_OF_TRANSFERASE_ACTIVITY	GOBP_NEGATIVE_REGULATION_OF_TRANSFERASE_ACTIVITY	7/171	272/17872	0.0159232312438257	0.132113059226116	0.11222211493387	RPS15/RACK1/APOE/PYCARD/RPS20/RPL11/GSTP1	7
GOBP_BIOLOGICAL_PROCESS_INVOLVED_IN_INTERACTION_WITH_SYMBIONT	GOBP_BIOLOGICAL_PROCESS_INVOLVED_IN_INTERACTION_WITH_SYMBIONT	GOBP_BIOLOGICAL_PROCESS_INVOLVED_IN_INTERACTION_WITH_SYMBIONT	4/171	101/17872	0.0161160060187907	0.132864673580487	0.112860566219127	GPX1/APOE/HSPA8/CFL1	4
GOBP_REGULATION_OF_AUTOPHAGY	GOBP_REGULATION_OF_AUTOPHAGY	GOBP_REGULATION_OF_AUTOPHAGY	8/171	339/17872	0.0165287767836209	0.132864673580487	0.112860566219127	HIF1A/TSPO/ATP6V0E1/PYCARD/USP36/TMEM59/ATP6V0B/ATP6V1G1	8
GOBP_PHOSPHOLIPID_TRANSPORT	GOBP_PHOSPHOLIPID_TRANSPORT	GOBP_PHOSPHOLIPID_TRANSPORT	4/171	102/17872	0.016651984945889	0.132864673580487	0.112860566219127	NPC2/APOE/APOC1/DBI	4
GOBP_REGULATION_OF_RESPONSE_TO_OXIDATIVE_STRESS	GOBP_REGULATION_OF_RESPONSE_TO_OXIDATIVE_STRESS	GOBP_REGULATION_OF_RESPONSE_TO_OXIDATIVE_STRESS	4/171	102/17872	0.016651984945889	0.132864673580487	0.112860566219127	GPX1/HIF1A/RACK1/CD36	4
GOBP_CELLULAR_GLUCOSE_HOMEOSTASIS	GOBP_CELLULAR_GLUCOSE_HOMEOSTASIS	GOBP_CELLULAR_GLUCOSE_HOMEOSTASIS	5/171	155/17872	0.0167493831885715	0.132864673580487	0.112860566219127	CYBA/GPX1/HIF1A/RACK1/SELENOT	5
GOBP_CELL_JUNCTION_DISASSEMBLY	GOBP_CELL_JUNCTION_DISASSEMBLY	GOBP_CELL_JUNCTION_DISASSEMBLY	2/171	21/17872	0.0169632886294202	0.132864673580487	0.112860566219127	C1QB/C1QC	2
GOBP_LEUKOTRIENE_BIOSYNTHETIC_PROCESS	GOBP_LEUKOTRIENE_BIOSYNTHETIC_PROCESS	GOBP_LEUKOTRIENE_BIOSYNTHETIC_PROCESS	2/171	21/17872	0.0169632886294202	0.132864673580487	0.112860566219127	LTA4H/MGST3	2
GOBP_MITOCHONDRIAL_DEPOLARIZATION	GOBP_MITOCHONDRIAL_DEPOLARIZATION	GOBP_MITOCHONDRIAL_DEPOLARIZATION	2/171	21/17872	0.0169632886294202	0.132864673580487	0.112860566219127	TSPO/RACK1	2
GOBP_MUSCLE_CELL_CELLULAR_HOMEOSTASIS	GOBP_MUSCLE_CELL_CELLULAR_HOMEOSTASIS	GOBP_MUSCLE_CELL_CELLULAR_HOMEOSTASIS	2/171	21/17872	0.0169632886294202	0.132864673580487	0.112860566219127	HIF1A/ALDOA	2
GOBP_PROTEIN_LOCALIZATION_TO_CELL_CELL_JUNCTION	GOBP_PROTEIN_LOCALIZATION_TO_CELL_CELL_JUNCTION	GOBP_PROTEIN_LOCALIZATION_TO_CELL_CELL_JUNCTION	2/171	21/17872	0.0169632886294202	0.132864673580487	0.112860566219127	ACTB/ACTG1	2
GOBP_REGULATION_OF_TRANSLATIONAL_FIDELITY	GOBP_REGULATION_OF_TRANSLATIONAL_FIDELITY	GOBP_REGULATION_OF_TRANSLATIONAL_FIDELITY	2/171	21/17872	0.0169632886294202	0.132864673580487	0.112860566219127	RPS9/RPS5	2
GOBP_IMMUNE_RESPONSE_REGULATING_SIGNALING_PATHWAY	GOBP_IMMUNE_RESPONSE_REGULATING_SIGNALING_PATHWAY	GOBP_IMMUNE_RESPONSE_REGULATING_SIGNALING_PATHWAY	10/171	479/17872	0.0171154087470501	0.132864673580487	0.112860566219127	CYBA/TYROBP/RPS3/FCER1G/CD14/FCN1/CD36/EZR/MNDA/MALT1	10
GOBP_RESPONSE_TO_EXTRACELLULAR_STIMULUS	GOBP_RESPONSE_TO_EXTRACELLULAR_STIMULUS	GOBP_RESPONSE_TO_EXTRACELLULAR_STIMULUS	10/171	479/17872	0.0171154087470501	0.132864673580487	0.112860566219127	CYBA/GPX1/TSPO/AIF1/APOE/GABARAP/HSPA8/SLC27A4/MAP1LC3B/RPS19	10
GOBP_INTERLEUKIN_8_PRODUCTION	GOBP_INTERLEUKIN_8_PRODUCTION	GOBP_INTERLEUKIN_8_PRODUCTION	4/171	103/17872	0.0171990159648452	0.132864673580487	0.112860566219127	TMSB4X/PYCARD/CD14/FCN1	4
GOBP_POSITIVE_REGULATION_OF_PROTEIN_LOCALIZATION_TO_MEMBRANE	GOBP_POSITIVE_REGULATION_OF_PROTEIN_LOCALIZATION_TO_MEMBRANE	GOBP_POSITIVE_REGULATION_OF_PROTEIN_LOCALIZATION_TO_MEMBRANE	4/171	103/17872	0.0171990159648452	0.132864673580487	0.112860566219127	RACK1/ITGB2/EZR/STX3	4
GOBP_TRIGLYCERIDE_METABOLIC_PROCESS	GOBP_TRIGLYCERIDE_METABOLIC_PROCESS	GOBP_TRIGLYCERIDE_METABOLIC_PROCESS	4/171	103/17872	0.0171990159648452	0.132864673580487	0.112860566219127	GPX1/APOE/APOC1/GPAT3	4
GOBP_ATP_BIOSYNTHETIC_PROCESS	GOBP_ATP_BIOSYNTHETIC_PROCESS	GOBP_ATP_BIOSYNTHETIC_PROCESS	3/171	57/17872	0.0172649010867299	0.132864673580487	0.112860566219127	TMSB4X/ATP5MG/ALDOA	3
GOBP_ICOSANOID_BIOSYNTHETIC_PROCESS	GOBP_ICOSANOID_BIOSYNTHETIC_PROCESS	GOBP_ICOSANOID_BIOSYNTHETIC_PROCESS	3/171	57/17872	0.0172649010867299	0.132864673580487	0.112860566219127	LTA4H/FABP5/MGST3	3
GOBP_REGULATION_OF_MONOOXYGENASE_ACTIVITY	GOBP_REGULATION_OF_MONOOXYGENASE_ACTIVITY	GOBP_REGULATION_OF_MONOOXYGENASE_ACTIVITY	3/171	57/17872	0.0172649010867299	0.132864673580487	0.112860566219127	HIF1A/DDAH2/APOE	3
GOBP_REGULATION_OF_TUMOR_NECROSIS_FACTOR_MEDIATED_SIGNALING_PATHWAY	GOBP_REGULATION_OF_TUMOR_NECROSIS_FACTOR_MEDIATED_SIGNALING_PATHWAY	GOBP_REGULATION_OF_TUMOR_NECROSIS_FACTOR_MEDIATED_SIGNALING_PATHWAY	3/171	57/17872	0.0172649010867299	0.132864673580487	0.112860566219127	PYCARD/CARD16/GSTP1	3
GOBP_REGULATION_OF_MACROAUTOPHAGY	GOBP_REGULATION_OF_MACROAUTOPHAGY	GOBP_REGULATION_OF_MACROAUTOPHAGY	5/171	158/17872	0.0180451124285353	0.138367576888841	0.117534952318106	HIF1A/ATP6V0E1/USP36/ATP6V0B/ATP6V1G1	5
GOBP_NEUTROPHIL_CHEMOTAXIS	GOBP_NEUTROPHIL_CHEMOTAXIS	GOBP_NEUTROPHIL_CHEMOTAXIS	4/171	105/17872	0.0183264857829877	0.138685792360635	0.11780525726342	ITGB2/S100A9/FCER1G/S100A8	4
GOBP_REGULATION_OF_TOR_SIGNALING	GOBP_REGULATION_OF_TOR_SIGNALING	GOBP_REGULATION_OF_TOR_SIGNALING	4/171	105/17872	0.0183264857829877	0.138685792360635	0.11780525726342	HIF1A/LAMTOR2/GPAT3/LAMTOR4	4
GOBP_CYTOPLASMIC_SEQUESTERING_OF_PROTEIN	GOBP_CYTOPLASMIC_SEQUESTERING_OF_PROTEIN	GOBP_CYTOPLASMIC_SEQUESTERING_OF_PROTEIN	2/171	22/17872	0.0185436746847553	0.138685792360635	0.11780525726342	TMSB4X/YWHAB	2
GOBP_MICROVILLUS_ASSEMBLY	GOBP_MICROVILLUS_ASSEMBLY	GOBP_MICROVILLUS_ASSEMBLY	2/171	22/17872	0.0185436746847553	0.138685792360635	0.11780525726342	EZR/FXYD5	2
GOBP_POSITIVE_REGULATION_OF_NITRIC_OXIDE_SYNTHASE_ACTIVITY	GOBP_POSITIVE_REGULATION_OF_NITRIC_OXIDE_SYNTHASE_ACTIVITY	GOBP_POSITIVE_REGULATION_OF_NITRIC_OXIDE_SYNTHASE_ACTIVITY	2/171	22/17872	0.0185436746847553	0.138685792360635	0.11780525726342	HIF1A/APOE	2
GOBP_POSITIVE_REGULATION_OF_REACTIVE_OXYGEN_SPECIES_BIOSYNTHETIC_PROCESS	GOBP_POSITIVE_REGULATION_OF_REACTIVE_OXYGEN_SPECIES_BIOSYNTHETIC_PROCESS	GOBP_POSITIVE_REGULATION_OF_REACTIVE_OXYGEN_SPECIES_BIOSYNTHETIC_PROCESS	2/171	22/17872	0.0185436746847553	0.138685792360635	0.11780525726342	CYBA/CD36	2
GOBP_PROTEIN_REFOLDING	GOBP_PROTEIN_REFOLDING	GOBP_PROTEIN_REFOLDING	2/171	22/17872	0.0185436746847553	0.138685792360635	0.11780525726342	HSPA8/HSP90AA1	2
GOBP_MACROPHAGE_ACTIVATION	GOBP_MACROPHAGE_ACTIVATION	GOBP_MACROPHAGE_ACTIVATION	4/171	106/17872	0.0189070451854021	0.140874263321222	0.119664232001474	TYROBP/AIF1/GRN/ITGB2	4
GOBP_REGULATION_OF_ANATOMICAL_STRUCTURE_SIZE	GOBP_REGULATION_OF_ANATOMICAL_STRUCTURE_SIZE	GOBP_REGULATION_OF_ANATOMICAL_STRUCTURE_SIZE	10/171	487/17872	0.0189689450611438	0.140874263321222	0.119664232001474	TMSB4X/TMSB10/GPX1/PFN1/APOE/PYCARD/LAMTOR4/EZR/ARPC2/CAPG	10
GOBP_SYNAPSE_ORGANIZATION	GOBP_SYNAPSE_ORGANIZATION	GOBP_SYNAPSE_ORGANIZATION	9/171	418/17872	0.0194130574022361	0.143670153039545	0.122039172519467	PFN1/ACTB/APOE/TUBA1A/HSPA8/ACTG1/CFL1/C1QB/C1QC	9
GOBP_MYELOID_LEUKOCYTE_MEDIATED_IMMUNITY	GOBP_MYELOID_LEUKOCYTE_MEDIATED_IMMUNITY	GOBP_MYELOID_LEUKOCYTE_MEDIATED_IMMUNITY	4/171	107/17872	0.0194988978907703	0.143804371944431	0.122153183423904	TYROBP/VAMP8/ITGB2/STXBP2	4
GOBP_POSTSYNAPSE_ORGANIZATION	GOBP_POSTSYNAPSE_ORGANIZATION	GOBP_POSTSYNAPSE_ORGANIZATION	5/171	162/17872	0.0198734975318966	0.146059891895323	0.12406911225522	ACTB/APOE/HSPA8/ACTG1/CFL1	5
GOBP_PINOCYTOSIS	GOBP_PINOCYTOSIS	GOBP_PINOCYTOSIS	2/171	23/17872	0.0201836419478642	0.146815258552272	0.12471075089632	PYCARD/PPT1	2
GOBP_POSITIVE_REGULATION_OF_EMBRYONIC_DEVELOPMENT	GOBP_POSITIVE_REGULATION_OF_EMBRYONIC_DEVELOPMENT	GOBP_POSITIVE_REGULATION_OF_EMBRYONIC_DEVELOPMENT	2/171	23/17872	0.0201836419478642	0.146815258552272	0.12471075089632	RACK1/CFL1	2
GOBP_PROTEIN_TARGETING_TO_LYSOSOME	GOBP_PROTEIN_TARGETING_TO_LYSOSOME	GOBP_PROTEIN_TARGETING_TO_LYSOSOME	2/171	23/17872	0.0201836419478642	0.146815258552272	0.12471075089632	HSPA8/ZFYVE16	2
GOBP_ORGANIC_HYDROXY_COMPOUND_TRANSPORT	GOBP_ORGANIC_HYDROXY_COMPOUND_TRANSPORT	GOBP_ORGANIC_HYDROXY_COMPOUND_TRANSPORT	7/171	286/17872	0.0203579755421789	0.147577952394498	0.125358613541565	NPC2/TSPO/ACTB/APOE/EEPD1/APOC1/CD36	7
GOBP_NEGATIVE_REGULATION_OF_CYTOSKELETON_ORGANIZATION	GOBP_NEGATIVE_REGULATION_OF_CYTOSKELETON_ORGANIZATION	GOBP_NEGATIVE_REGULATION_OF_CYTOSKELETON_ORGANIZATION	5/171	164/17872	0.0208316276388673	0.150497881309368	0.127838917912705	TMSB4X/TMSB10/PFN1/GMFG/CAPG	5
GOBP_I_KAPPAB_KINASE_NF_KAPPAB_SIGNALING	GOBP_I_KAPPAB_KINASE_NF_KAPPAB_SIGNALING	GOBP_I_KAPPAB_KINASE_NF_KAPPAB_SIGNALING	7/171	288/17872	0.0210552842415931	0.15159804653947	0.128773442248316	S100A4/PYCARD/LGALS1/CD36/CARD16/GSTP1/MALT1	7
GOBP_NEGATIVE_REGULATION_OF_IMMUNE_SYSTEM_PROCESS	GOBP_NEGATIVE_REGULATION_OF_IMMUNE_SYSTEM_PROCESS	GOBP_NEGATIVE_REGULATION_OF_IMMUNE_SYSTEM_PROCESS	9/171	425/17872	0.0213486567533924	0.153191036973667	0.130126592017477	TYROBP/GPX1/GRN/EZR/TMEM176B/MNDA/C1QC/RPS19/TMEM176A	9
GOBP_POSITIVE_REGULATION_OF_INTERLEUKIN_8_PRODUCTION	GOBP_POSITIVE_REGULATION_OF_INTERLEUKIN_8_PRODUCTION	GOBP_POSITIVE_REGULATION_OF_INTERLEUKIN_8_PRODUCTION	3/171	62/17872	0.021559355352301	0.15418205645888	0.13096840359328	PYCARD/CD14/FCN1	3
GOBP_REGULATION_OF_RESPONSE_TO_WOUNDING	GOBP_REGULATION_OF_RESPONSE_TO_WOUNDING	GOBP_REGULATION_OF_RESPONSE_TO_WOUNDING	5/171	166/17872	0.0218194783251217	0.154923991056214	0.131598632505873	GRN/APOE/ACTG1/CD36/CD9	5
GOBP_GLUCOSE_6_PHOSPHATE_METABOLIC_PROCESS	GOBP_GLUCOSE_6_PHOSPHATE_METABOLIC_PROCESS	GOBP_GLUCOSE_6_PHOSPHATE_METABOLIC_PROCESS	2/171	24/17872	0.0218819196407082	0.154923991056214	0.131598632505873	TKT/TALDO1	2
GOBP_REGULATION_OF_PROTON_TRANSPORT	GOBP_REGULATION_OF_PROTON_TRANSPORT	GOBP_REGULATION_OF_PROTON_TRANSPORT	2/171	24/17872	0.0218819196407082	0.154923991056214	0.131598632505873	TMSB4X/NDUFA4	2
GOBP_INTERLEUKIN_2_PRODUCTION	GOBP_INTERLEUKIN_2_PRODUCTION	GOBP_INTERLEUKIN_2_PRODUCTION	3/171	63/17872	0.022481970740694	0.157074798467396	0.133425614319118	RPS3/EZR/MALT1	3
GOBP_MAINTENANCE_OF_PROTEIN_LOCATION_IN_CELL	GOBP_MAINTENANCE_OF_PROTEIN_LOCATION_IN_CELL	GOBP_MAINTENANCE_OF_PROTEIN_LOCATION_IN_CELL	3/171	63/17872	0.022481970740694	0.157074798467396	0.133425614319118	TMSB4X/TMSB10/TSPO	3
GOBP_REGULATION_OF_LYMPHOCYTE_MIGRATION	GOBP_REGULATION_OF_LYMPHOCYTE_MIGRATION	GOBP_REGULATION_OF_LYMPHOCYTE_MIGRATION	3/171	63/17872	0.022481970740694	0.157074798467396	0.133425614319118	AIF1/PYCARD/OXSR1	3
GOBP_ESTABLISHMENT_OF_PROTEIN_LOCALIZATION_TO_ORGANELLE	GOBP_ESTABLISHMENT_OF_PROTEIN_LOCALIZATION_TO_ORGANELLE	GOBP_ESTABLISHMENT_OF_PROTEIN_LOCALIZATION_TO_ORGANELLE	9/171	429/17872	0.022515297710847	0.157074798467396	0.133425614319118	TSPO/SRP14/USP36/HSPA8/RANBP2/HSP90AA1/CD36/SEC62/ZFYVE16	9
GOBP_HEMOSTASIS	GOBP_HEMOSTASIS	GOBP_HEMOSTASIS	6/171	228/17872	0.0225902487412095	0.157074798467396	0.133425614319118	ACTB/APOE/FCER1G/ACTG1/CD36/CD9	6
GOBP_POSITIVE_REGULATION_OF_LIPID_LOCALIZATION	GOBP_POSITIVE_REGULATION_OF_LIPID_LOCALIZATION	GOBP_POSITIVE_REGULATION_OF_LIPID_LOCALIZATION	4/171	112/17872	0.0226294201181842	0.157074798467396	0.133425614319118	APOE/EEPD1/DBI/CD36	4
GOBP_DEFENSE_RESPONSE_TO_BACTERIUM	GOBP_DEFENSE_RESPONSE_TO_BACTERIUM	GOBP_DEFENSE_RESPONSE_TO_BACTERIUM	8/171	361/17872	0.0230863690625939	0.159406864278184	0.13540656426445	CYBA/GRN/PYCARD/S100A9/FCER1G/S100A8/CD36/RPS19	8
GOBP_WOUND_HEALING	GOBP_WOUND_HEALING	GOBP_WOUND_HEALING	9/171	431/17872	0.0231154963265916	0.159406864278184	0.13540656426445	GPX1/HIF1A/ACTB/APOE/FCER1G/ACTG1/S100A8/CD36/CD9	9
GOBP_REGULATION_OF_NIK_NF_KAPPAB_SIGNALING	GOBP_REGULATION_OF_NIK_NF_KAPPAB_SIGNALING	GOBP_REGULATION_OF_NIK_NF_KAPPAB_SIGNALING	4/171	113/17872	0.0232901195734463	0.159890225767301	0.1358171508401	TMSB4X/RPS3/CD14/EZR	4
GOBP_NEURAL_NUCLEUS_DEVELOPMENT	GOBP_NEURAL_NUCLEUS_DEVELOPMENT	GOBP_NEURAL_NUCLEUS_DEVELOPMENT	3/171	64/17872	0.0234258470255697	0.159890225767301	0.1358171508401	ACTB/DYNLL1/COX6B1	3
GOBP_RESPONSE_TO_FUNGUS	GOBP_RESPONSE_TO_FUNGUS	GOBP_RESPONSE_TO_FUNGUS	3/171	64/17872	0.0234258470255697	0.159890225767301	0.1358171508401	S100A9/S100A8/MALT1	3
GOBP_INTRINSIC_APOPTOTIC_SIGNALING_PATHWAY	GOBP_INTRINSIC_APOPTOTIC_SIGNALING_PATHWAY	GOBP_INTRINSIC_APOPTOTIC_SIGNALING_PATHWAY	7/171	295/17872	0.0236268174919549	0.159890225767301	0.1358171508401	GPX1/HIF1A/RPS3/RACK1/PYCARD/S100A9/S100A8	7
GOBP_NEGATIVE_REGULATION_OF_RNA_SPLICING	GOBP_NEGATIVE_REGULATION_OF_RNA_SPLICING	GOBP_NEGATIVE_REGULATION_OF_RNA_SPLICING	2/171	25/17872	0.0236372555983674	0.159890225767301	0.1358171508401	RPS26/RPS13	2
GOBP_POSITIVE_REGULATION_OF_LEUKOCYTE_DEGRANULATION	GOBP_POSITIVE_REGULATION_OF_LEUKOCYTE_DEGRANULATION	GOBP_POSITIVE_REGULATION_OF_LEUKOCYTE_DEGRANULATION	2/171	25/17872	0.0236372555983674	0.159890225767301	0.1358171508401	VAMP8/ITGB2	2
GOBP_GLUTATHIONE_METABOLIC_PROCESS	GOBP_GLUTATHIONE_METABOLIC_PROCESS	GOBP_GLUTATHIONE_METABOLIC_PROCESS	3/171	65/17872	0.0243909791975668	0.164464888303593	0.139703052112379	GPX1/EEF1G/GSTP1	3
GOBP_RESPONSE_TO_OXIDATIVE_STRESS	GOBP_RESPONSE_TO_OXIDATIVE_STRESS	GOBP_RESPONSE_TO_OXIDATIVE_STRESS	9/171	436/17872	0.024666079436477	0.16579352127556	0.140831646083016	GPX1/HIF1A/RPS3/AIF1/RACK1/APOE/CD36/GSTP1/OXSR1	9
GOBP_INTERLEUKIN_6_PRODUCTION	GOBP_INTERLEUKIN_6_PRODUCTION	GOBP_INTERLEUKIN_6_PRODUCTION	5/171	172/17872	0.024964356997561	0.16726906707514	0.142085033683611	CYBA/TYROBP/AIF1/PYCARD/CD36	5
GOBP_REGULATION_OF_APOPTOTIC_SIGNALING_PATHWAY	GOBP_REGULATION_OF_APOPTOTIC_SIGNALING_PATHWAY	GOBP_REGULATION_OF_APOPTOTIC_SIGNALING_PATHWAY	8/171	367/17872	0.0251544001274821	0.16734500202263	0.142149535864202	GPX1/HIF1A/RPS3/RACK1/PYCARD/S100A9/S100A8/GSTP1	8
GOBP_CELLULAR_ALDEHYDE_METABOLIC_PROCESS	GOBP_CELLULAR_ALDEHYDE_METABOLIC_PROCESS	GOBP_CELLULAR_ALDEHYDE_METABOLIC_PROCESS	3/171	66/17872	0.0253773558898259	0.16734500202263	0.142149535864202	TKT/TALDO1/TPI1	3
GOBP_CELLULAR_IRON_ION_HOMEOSTASIS	GOBP_CELLULAR_IRON_ION_HOMEOSTASIS	GOBP_CELLULAR_IRON_ION_HOMEOSTASIS	3/171	66/17872	0.0253773558898259	0.16734500202263	0.142149535864202	FTL/HIF1A/ATP6V1G1	3
GOBP_POSITIVE_REGULATION_OF_MONONUCLEAR_CELL_MIGRATION	GOBP_POSITIVE_REGULATION_OF_MONONUCLEAR_CELL_MIGRATION	GOBP_POSITIVE_REGULATION_OF_MONONUCLEAR_CELL_MIGRATION	3/171	66/17872	0.0253773558898259	0.16734500202263	0.142149535864202	AIF1/PYCARD/OXSR1	3
GOBP_REGULATION_OF_ANTIGEN_RECEPTOR_MEDIATED_SIGNALING_PATHWAY	GOBP_REGULATION_OF_ANTIGEN_RECEPTOR_MEDIATED_SIGNALING_PATHWAY	GOBP_REGULATION_OF_ANTIGEN_RECEPTOR_MEDIATED_SIGNALING_PATHWAY	3/171	66/17872	0.0253773558898259	0.16734500202263	0.142149535864202	RPS3/EZR/MALT1	3
GOBP_REGULATION_OF_LIPOPOLYSACCHARIDE_MEDIATED_SIGNALING_PATHWAY	GOBP_REGULATION_OF_LIPOPOLYSACCHARIDE_MEDIATED_SIGNALING_PATHWAY	GOBP_REGULATION_OF_LIPOPOLYSACCHARIDE_MEDIATED_SIGNALING_PATHWAY	2/171	26/17872	0.0254484160326315	0.16734500202263	0.142149535864202	CD36/CARD16	2
GOBP_MODULATION_BY_HOST_OF_SYMBIONT_PROCESS	GOBP_MODULATION_BY_HOST_OF_SYMBIONT_PROCESS	GOBP_MODULATION_BY_HOST_OF_SYMBIONT_PROCESS	3/171	67/17872	0.0263849595403443	0.171906914305802	0.146024606561673	APOE/HSPA8/CFL1	3
GOBP_POSITIVE_REGULATION_OF_PROTEIN_LOCALIZATION_TO_CELL_PERIPHERY	GOBP_POSITIVE_REGULATION_OF_PROTEIN_LOCALIZATION_TO_CELL_PERIPHERY	GOBP_POSITIVE_REGULATION_OF_PROTEIN_LOCALIZATION_TO_CELL_PERIPHERY	3/171	67/17872	0.0263849595403443	0.171906914305802	0.146024606561673	RACK1/EZR/STX3	3
GOBP_T_CELL_MIGRATION	GOBP_T_CELL_MIGRATION	GOBP_T_CELL_MIGRATION	3/171	67/17872	0.0263849595403443	0.171906914305802	0.146024606561673	AIF1/PYCARD/OXSR1	3
GOBP_POLYOL_CATABOLIC_PROCESS	GOBP_POLYOL_CATABOLIC_PROCESS	GOBP_POLYOL_CATABOLIC_PROCESS	2/171	27/17872	0.0273141852983687	0.175804029011319	0.149334971615324	INPP5A/TPI1	2
GOBP_POSITIVE_REGULATION_OF_CHOLESTEROL_EFFLUX	GOBP_POSITIVE_REGULATION_OF_CHOLESTEROL_EFFLUX	GOBP_POSITIVE_REGULATION_OF_CHOLESTEROL_EFFLUX	2/171	27/17872	0.0273141852983687	0.175804029011319	0.149334971615324	APOE/EEPD1	2
GOBP_RENAL_FILTRATION	GOBP_RENAL_FILTRATION	GOBP_RENAL_FILTRATION	2/171	27/17872	0.0273141852983687	0.175804029011319	0.149334971615324	CYBA/SULF2	2
GOBP_RIBOSOMAL_LARGE_SUBUNIT_ASSEMBLY	GOBP_RIBOSOMAL_LARGE_SUBUNIT_ASSEMBLY	GOBP_RIBOSOMAL_LARGE_SUBUNIT_ASSEMBLY	2/171	27/17872	0.0273141852983687	0.175804029011319	0.149334971615324	RPL3/RPL11	2
GOBP_PROTEIN_LOCALIZATION_TO_VACUOLE	GOBP_PROTEIN_LOCALIZATION_TO_VACUOLE	GOBP_PROTEIN_LOCALIZATION_TO_VACUOLE	3/171	68/17872	0.0274137665514613	0.175911903792458	0.149426604767704	HSPA8/LAMTOR4/ZFYVE16	3
GOBP_POSITIVE_REGULATION_OF_PROTEIN_LOCALIZATION	GOBP_POSITIVE_REGULATION_OF_PROTEIN_LOCALIZATION	GOBP_POSITIVE_REGULATION_OF_PROTEIN_LOCALIZATION	9/171	445/17872	0.027641823170403	0.176841061487759	0.150215868465665	OAZ1/TYROBP/HIF1A/RACK1/ITGB2/USP36/EZR/STX3/SERP1	9
GOBP_POSITIVE_REGULATION_OF_CELL_ADHESION	GOBP_POSITIVE_REGULATION_OF_CELL_ADHESION	GOBP_POSITIVE_REGULATION_OF_CELL_ADHESION	9/171	446/17872	0.027987438038682	0.178514469652134	0.151637328270273	RPS3/AIF1/PYCARD/ITGB2/LGALS1/CD36/STX3/ARPC2/MALT1	9
GOBP_NEURON_APOPTOTIC_PROCESS	GOBP_NEURON_APOPTOTIC_PROCESS	GOBP_NEURON_APOPTOTIC_PROCESS	6/171	240/17872	0.028123246670076	0.178843640500723	0.151916939150678	TYROBP/GPX1/HIF1A/GRN/APOE/PPT1	6
GOBP_PROTEIN_LOCALIZATION_TO_CELL_SURFACE	GOBP_PROTEIN_LOCALIZATION_TO_CELL_SURFACE	GOBP_PROTEIN_LOCALIZATION_TO_CELL_SURFACE	3/171	69/17872	0.0284637474465172	0.180468655451948	0.153297291825076	TYROBP/FCN1/STX3	3
GOBP_POSITIVE_REGULATION_OF_ESTABLISHMENT_OF_PROTEIN_LOCALIZATION	GOBP_POSITIVE_REGULATION_OF_ESTABLISHMENT_OF_PROTEIN_LOCALIZATION	GOBP_POSITIVE_REGULATION_OF_ESTABLISHMENT_OF_PROTEIN_LOCALIZATION	7/171	308/17872	0.0289627388985407	0.182087004889884	0.154671982545972	OAZ1/HIF1A/RACK1/ITGB2/USP36/EZR/SERP1	7
GOBP_INNATE_IMMUNE_RESPONSE_ACTIVATING_SIGNAL_TRANSDUCTION	GOBP_INNATE_IMMUNE_RESPONSE_ACTIVATING_SIGNAL_TRANSDUCTION	GOBP_INNATE_IMMUNE_RESPONSE_ACTIVATING_SIGNAL_TRANSDUCTION	2/171	28/17872	0.0292333656626415	0.182087004889884	0.154671982545972	TYROBP/FCN1	2
GOBP_NEGATIVE_REGULATION_OF_PROTEIN_MATURATION	GOBP_NEGATIVE_REGULATION_OF_PROTEIN_MATURATION	GOBP_NEGATIVE_REGULATION_OF_PROTEIN_MATURATION	2/171	28/17872	0.0292333656626415	0.182087004889884	0.154671982545972	TMEM59/CARD16	2
GOBP_NEGATIVE_REGULATION_OF_TUMOR_NECROSIS_FACTOR_MEDIATED_SIGNALING_PATHWAY	GOBP_NEGATIVE_REGULATION_OF_TUMOR_NECROSIS_FACTOR_MEDIATED_SIGNALING_PATHWAY	GOBP_NEGATIVE_REGULATION_OF_TUMOR_NECROSIS_FACTOR_MEDIATED_SIGNALING_PATHWAY	2/171	28/17872	0.0292333656626415	0.182087004889884	0.154671982545972	CARD16/GSTP1	2
GOBP_POSITIVE_REGULATION_OF_ACTIVATED_T_CELL_PROLIFERATION	GOBP_POSITIVE_REGULATION_OF_ACTIVATED_T_CELL_PROLIFERATION	GOBP_POSITIVE_REGULATION_OF_ACTIVATED_T_CELL_PROLIFERATION	2/171	28/17872	0.0292333656626415	0.182087004889884	0.154671982545972	RPS3/PYCARD	2
GOBP_POSITIVE_REGULATION_OF_SIGNAL_TRANSDUCTION_BY_P53_CLASS_MEDIATOR	GOBP_POSITIVE_REGULATION_OF_SIGNAL_TRANSDUCTION_BY_P53_CLASS_MEDIATOR	GOBP_POSITIVE_REGULATION_OF_SIGNAL_TRANSDUCTION_BY_P53_CLASS_MEDIATOR	2/171	28/17872	0.0292333656626415	0.182087004889884	0.154671982545972	RPS15/RPS20	2
GOBP_PLATELET_AGGREGATION	GOBP_PLATELET_AGGREGATION	GOBP_PLATELET_AGGREGATION	3/171	70/17872	0.0295348670237288	0.182892296088629	0.155356029089063	ACTB/ACTG1/CD9	3
GOBP_POSITIVE_REGULATION_OF_CHEMOKINE_PRODUCTION	GOBP_POSITIVE_REGULATION_OF_CHEMOKINE_PRODUCTION	GOBP_POSITIVE_REGULATION_OF_CHEMOKINE_PRODUCTION	3/171	70/17872	0.0295348670237288	0.182892296088629	0.155356029089063	HIF1A/AIF1/PYCARD	3
GOBP_POSITIVE_REGULATION_OF_HORMONE_SECRETION	GOBP_POSITIVE_REGULATION_OF_HORMONE_SECRETION	GOBP_POSITIVE_REGULATION_OF_HORMONE_SECRETION	4/171	122/17872	0.0297645578341962	0.183778839650677	0.156109094638348	VAMP8/HIF1A/SELENOT/SERP1	4
GOBP_REGULATION_OF_COAGULATION	GOBP_REGULATION_OF_COAGULATION	GOBP_REGULATION_OF_COAGULATION	3/171	71/17872	0.0306270845073215	0.188283394312206	0.159935443478601	APOE/CD36/CD9	3
GOBP_POSITIVE_REGULATION_OF_LEUKOCYTE_CELL_CELL_ADHESION	GOBP_POSITIVE_REGULATION_OF_LEUKOCYTE_CELL_CELL_ADHESION	GOBP_POSITIVE_REGULATION_OF_LEUKOCYTE_CELL_CELL_ADHESION	6/171	245/17872	0.0306714003917247	0.188283394312206	0.159935443478601	RPS3/AIF1/PYCARD/ITGB2/LGALS1/MALT1	6
GOBP_NEGATIVE_REGULATION_OF_INFLAMMATORY_RESPONSE	GOBP_NEGATIVE_REGULATION_OF_INFLAMMATORY_RESPONSE	GOBP_NEGATIVE_REGULATION_OF_INFLAMMATORY_RESPONSE	5/171	182/17872	0.0308263886261453	0.188689479659748	0.160280388609777	GPX1/GRN/APOE/GSTP1/RPS19	5
GOBP_COTRANSLATIONAL_PROTEIN_TARGETING_TO_MEMBRANE	GOBP_COTRANSLATIONAL_PROTEIN_TARGETING_TO_MEMBRANE	GOBP_COTRANSLATIONAL_PROTEIN_TARGETING_TO_MEMBRANE	2/171	29/17872	0.0312047770765384	0.188828907437515	0.160398824139112	SRP14/SEC62	2
GOBP_POSITIVE_REGULATION_OF_VASCULAR_ENDOTHELIAL_GROWTH_FACTOR_PRODUCTION	GOBP_POSITIVE_REGULATION_OF_VASCULAR_ENDOTHELIAL_GROWTH_FACTOR_PRODUCTION	GOBP_POSITIVE_REGULATION_OF_VASCULAR_ENDOTHELIAL_GROWTH_FACTOR_PRODUCTION	2/171	29/17872	0.0312047770765384	0.188828907437515	0.160398824139112	HIF1A/SULF2	2
GOBP_PROTEIN_LIPID_COMPLEX_ASSEMBLY	GOBP_PROTEIN_LIPID_COMPLEX_ASSEMBLY	GOBP_PROTEIN_LIPID_COMPLEX_ASSEMBLY	2/171	29/17872	0.0312047770765384	0.188828907437515	0.160398824139112	APOE/APOC1	2
GOBP_REGULATION_OF_OXIDATIVE_STRESS_INDUCED_INTRINSIC_APOPTOTIC_SIGNALING_PATHWAY	GOBP_REGULATION_OF_OXIDATIVE_STRESS_INDUCED_INTRINSIC_APOPTOTIC_SIGNALING_PATHWAY	GOBP_REGULATION_OF_OXIDATIVE_STRESS_INDUCED_INTRINSIC_APOPTOTIC_SIGNALING_PATHWAY	2/171	29/17872	0.0312047770765384	0.188828907437515	0.160398824139112	GPX1/HIF1A	2
GOBP_POSITIVE_REGULATION_OF_RESPONSE_TO_WOUNDING	GOBP_POSITIVE_REGULATION_OF_RESPONSE_TO_WOUNDING	GOBP_POSITIVE_REGULATION_OF_RESPONSE_TO_WOUNDING	3/171	72/17872	0.0317403536959613	0.19152417968813	0.162688296156931	GRN/ACTG1/CD36	3
GOBP_COMPLEMENT_ACTIVATION	GOBP_COMPLEMENT_ACTIVATION	GOBP_COMPLEMENT_ACTIVATION	4/171	125/17872	0.0321364599818057	0.193364988672395	0.164251952911331	CFD/FCN1/C1QB/C1QC	4
GOBP_MICROVILLUS_ORGANIZATION	GOBP_MICROVILLUS_ORGANIZATION	GOBP_MICROVILLUS_ORGANIZATION	2/171	30/17872	0.0332272569496924	0.198801954256751	0.168870328871083	EZR/FXYD5	2
GOBP_NEGATIVE_REGULATION_OF_GLYCOPROTEIN_METABOLIC_PROCESS	GOBP_NEGATIVE_REGULATION_OF_GLYCOPROTEIN_METABOLIC_PROCESS	GOBP_NEGATIVE_REGULATION_OF_GLYCOPROTEIN_METABOLIC_PROCESS	2/171	30/17872	0.0332272569496924	0.198801954256751	0.168870328871083	CST3/TMEM59	2
GOBP_GRANULOCYTE_CHEMOTAXIS	GOBP_GRANULOCYTE_CHEMOTAXIS	GOBP_GRANULOCYTE_CHEMOTAXIS	4/171	127/17872	0.033777682133631	0.20152751924672	0.171185532752938	ITGB2/S100A9/FCER1G/S100A8	4
GOBP_PHOSPHATIDYLCHOLINE_METABOLIC_PROCESS	GOBP_PHOSPHATIDYLCHOLINE_METABOLIC_PROCESS	GOBP_PHOSPHATIDYLCHOLINE_METABOLIC_PROCESS	3/171	74/17872	0.0340298361272528	0.201897686967276	0.171499968015617	APOC1/DBI/FABP5	3
GOBP_RIBONUCLEOSIDE_TRIPHOSPHATE_BIOSYNTHETIC_PROCESS	GOBP_RIBONUCLEOSIDE_TRIPHOSPHATE_BIOSYNTHETIC_PROCESS	GOBP_RIBONUCLEOSIDE_TRIPHOSPHATE_BIOSYNTHETIC_PROCESS	3/171	74/17872	0.0340298361272528	0.201897686967276	0.171499968015617	TMSB4X/ATP5MG/ALDOA	3
GOBP_NEUTROPHIL_MIGRATION	GOBP_NEUTROPHIL_MIGRATION	GOBP_NEUTROPHIL_MIGRATION	4/171	128/17872	0.0346163322063235	0.204316490890925	0.173554596782162	ITGB2/S100A9/FCER1G/S100A8	4
GOBP_POSITIVE_REGULATION_OF_I_KAPPAB_KINASE_NF_KAPPAB_SIGNALING	GOBP_POSITIVE_REGULATION_OF_I_KAPPAB_KINASE_NF_KAPPAB_SIGNALING	GOBP_POSITIVE_REGULATION_OF_I_KAPPAB_KINASE_NF_KAPPAB_SIGNALING	5/171	188/17872	0.0347261079150772	0.204316490890925	0.173554596782162	S100A4/LGALS1/CD36/CARD16/MALT1	5
GOBP_REGENERATION	GOBP_REGENERATION	GOBP_REGENERATION	5/171	188/17872	0.0347261079150772	0.204316490890925	0.173554596782162	GPX1/RPS15/TSPO/GRN/CD9	5
GOBP_IMMUNE_RESPONSE_REGULATING_CELL_SURFACE_RECEPTOR_SIGNALING_PATHWAY	GOBP_IMMUNE_RESPONSE_REGULATING_CELL_SURFACE_RECEPTOR_SIGNALING_PATHWAY	GOBP_IMMUNE_RESPONSE_REGULATING_CELL_SURFACE_RECEPTOR_SIGNALING_PATHWAY	7/171	321/17872	0.0350622444486134	0.205415007358664	0.174487720593097	TYROBP/RPS3/FCER1G/FCN1/EZR/MNDA/MALT1	7
GOBP_EXOCYTIC_PROCESS	GOBP_EXOCYTIC_PROCESS	GOBP_EXOCYTIC_PROCESS	3/171	75/17872	0.0352059311383121	0.205415007358664	0.174487720593097	VAMP8/STXBP2/STX3	3
GOBP_PEPTIDE_CATABOLIC_PROCESS	GOBP_PEPTIDE_CATABOLIC_PROCESS	GOBP_PEPTIDE_CATABOLIC_PROCESS	2/171	31/17872	0.0352996599274541	0.205415007358664	0.174487720593097	ANPEP/LTA4H	2
GOBP_POSITIVE_REGULATION_OF_DEFENSE_RESPONSE_TO_VIRUS_BY_HOST	GOBP_POSITIVE_REGULATION_OF_DEFENSE_RESPONSE_TO_VIRUS_BY_HOST	GOBP_POSITIVE_REGULATION_OF_DEFENSE_RESPONSE_TO_VIRUS_BY_HOST	2/171	31/17872	0.0352996599274541	0.205415007358664	0.174487720593097	PYCARD/HSP90AA1	2
GOBP_REGULATION_OF_LEUKOCYTE_PROLIFERATION	GOBP_REGULATION_OF_LEUKOCYTE_PROLIFERATION	GOBP_REGULATION_OF_LEUKOCYTE_PROLIFERATION	6/171	254/17872	0.0356301019174882	0.206771411127718	0.175639904189171	TYROBP/RPS3/AIF1/PYCARD/MNDA/GSTP1	6
GOBP_PROTEIN_TARGETING_TO_MEMBRANE	GOBP_PROTEIN_TARGETING_TO_MEMBRANE	GOBP_PROTEIN_TARGETING_TO_MEMBRANE	4/171	130/17872	0.036329779681872	0.210257362518518	0.178601010683289	SRP14/ITGB2/NACA/SEC62	4
GOBP_RIBOSE_PHOSPHATE_BIOSYNTHETIC_PROCESS	GOBP_RIBOSE_PHOSPHATE_BIOSYNTHETIC_PROCESS	GOBP_RIBOSE_PHOSPHATE_BIOSYNTHETIC_PROCESS	5/171	191/17872	0.0367855832168765	0.211822366737211	0.179930387841996	TMSB4X/ATP5MG/TKT/ALDOA/PPT1	5
GOBP_LIPID_LOCALIZATION	GOBP_LIPID_LOCALIZATION	GOBP_LIPID_LOCALIZATION	9/171	469/17872	0.0367996484585833	0.211822366737211	0.179930387841996	NPC2/TSPO/APOE/EEPD1/APOC1/DBI/CD36/SLC27A4/FABP5	9
GOBP_POSITIVE_REGULATION_OF_MONOOXYGENASE_ACTIVITY	GOBP_POSITIVE_REGULATION_OF_MONOOXYGENASE_ACTIVITY	GOBP_POSITIVE_REGULATION_OF_MONOOXYGENASE_ACTIVITY	2/171	32/17872	0.0374208576706919	0.214236931785848	0.181981415938618	HIF1A/APOE	2
GOBP_RESPONSE_TO_MINERALOCORTICOID	GOBP_RESPONSE_TO_MINERALOCORTICOID	GOBP_RESPONSE_TO_MINERALOCORTICOID	2/171	32/17872	0.0374208576706919	0.214236931785848	0.181981415938618	CYBA/RPL27	2
GOBP_REGULATION_OF_OXIDATIVE_STRESS_INDUCED_CELL_DEATH	GOBP_REGULATION_OF_OXIDATIVE_STRESS_INDUCED_CELL_DEATH	GOBP_REGULATION_OF_OXIDATIVE_STRESS_INDUCED_CELL_DEATH	3/171	77/17872	0.0376204965274111	0.214800899527477	0.182460472688123	GPX1/HIF1A/RACK1	3
GOBP_NEUTRAL_LIPID_METABOLIC_PROCESS	GOBP_NEUTRAL_LIPID_METABOLIC_PROCESS	GOBP_NEUTRAL_LIPID_METABOLIC_PROCESS	4/171	132/17872	0.038091494635655	0.216907063287215	0.184249532398794	GPX1/APOE/APOC1/GPAT3	4
GOBP_LEUKOCYTE_DEGRANULATION	GOBP_LEUKOCYTE_DEGRANULATION	GOBP_LEUKOCYTE_DEGRANULATION	3/171	78/17872	0.0388588199272002	0.220096356067662	0.186958645207638	VAMP8/ITGB2/STXBP2	3
GOBP_ORGANIC_HYDROXY_COMPOUND_CATABOLIC_PROCESS	GOBP_ORGANIC_HYDROXY_COMPOUND_CATABOLIC_PROCESS	GOBP_ORGANIC_HYDROXY_COMPOUND_CATABOLIC_PROCESS	3/171	78/17872	0.0388588199272002	0.220096356067662	0.186958645207638	APOE/INPP5A/TPI1	3
GOBP_REGULATION_OF_WOUND_HEALING	GOBP_REGULATION_OF_WOUND_HEALING	GOBP_REGULATION_OF_WOUND_HEALING	4/171	133/17872	0.0389904722612315	0.220127237873067	0.186984877447932	APOE/ACTG1/CD36/CD9	4
GOBP_CGMP_MEDIATED_SIGNALING	GOBP_CGMP_MEDIATED_SIGNALING	GOBP_CGMP_MEDIATED_SIGNALING	2/171	33/17872	0.0395897386381882	0.220127237873067	0.186984877447932	APOE/CD36	2
GOBP_MICROTUBULE_ORGANIZING_CENTER_LOCALIZATION	GOBP_MICROTUBULE_ORGANIZING_CENTER_LOCALIZATION	GOBP_MICROTUBULE_ORGANIZING_CENTER_LOCALIZATION	2/171	33/17872	0.0395897386381882	0.220127237873067	0.186984877447932	RANBP2/EZR	2
GOBP_NEURON_DEATH_IN_RESPONSE_TO_OXIDATIVE_STRESS	GOBP_NEURON_DEATH_IN_RESPONSE_TO_OXIDATIVE_STRESS	GOBP_NEURON_DEATH_IN_RESPONSE_TO_OXIDATIVE_STRESS	2/171	33/17872	0.0395897386381882	0.220127237873067	0.186984877447932	HIF1A/RACK1	2
GOBP_POSITIVE_REGULATION_OF_STEROID_METABOLIC_PROCESS	GOBP_POSITIVE_REGULATION_OF_STEROID_METABOLIC_PROCESS	GOBP_POSITIVE_REGULATION_OF_STEROID_METABOLIC_PROCESS	2/171	33/17872	0.0395897386381882	0.220127237873067	0.186984877447932	APOE/APOC1	2
GOBP_PROTEIN_CONTAINING_COMPLEX_REMODELING	GOBP_PROTEIN_CONTAINING_COMPLEX_REMODELING	GOBP_PROTEIN_CONTAINING_COMPLEX_REMODELING	2/171	33/17872	0.0395897386381882	0.220127237873067	0.186984877447932	APOE/APOC1	2
GOBP_TRANSEPITHELIAL_TRANSPORT	GOBP_TRANSEPITHELIAL_TRANSPORT	GOBP_TRANSEPITHELIAL_TRANSPORT	2/171	33/17872	0.0395897386381882	0.220127237873067	0.186984877447932	ACTB/ACTG1	2
GOBP_ERYTHROCYTE_HOMEOSTASIS	GOBP_ERYTHROCYTE_HOMEOSTASIS	GOBP_ERYTHROCYTE_HOMEOSTASIS	4/171	134/17872	0.0399015369874852	0.221281630708664	0.187965464879894	HIF1A/RPS14/RPS6/RPS19	4
GOBP_ASTROCYTE_DIFFERENTIATION	GOBP_ASTROCYTE_DIFFERENTIATION	GOBP_ASTROCYTE_DIFFERENTIATION	3/171	79/17872	0.0401177316265055	0.221901203059109	0.18849175440743	GRN/S100A9/S100A8	3
GOBP_REGULATION_OF_PROTEIN_BINDING	GOBP_REGULATION_OF_PROTEIN_BINDING	GOBP_REGULATION_OF_PROTEIN_BINDING	5/171	197/17872	0.0411262981026668	0.226888979662505	0.192728571286318	ACTB/RACK1/APOE/RPL11/CARD16	5
GOBP_LEUKOTRIENE_METABOLIC_PROCESS	GOBP_LEUKOTRIENE_METABOLIC_PROCESS	GOBP_LEUKOTRIENE_METABOLIC_PROCESS	2/171	34/17872	0.0418052078716037	0.228262883082998	0.193895619786034	LTA4H/MGST3	2
GOBP_MATURE_B_CELL_DIFFERENTIATION	GOBP_MATURE_B_CELL_DIFFERENTIATION	GOBP_MATURE_B_CELL_DIFFERENTIATION	2/171	34/17872	0.0418052078716037	0.228262883082998	0.193895619786034	LGALS1/MALT1	2
GOBP_POSITIVE_REGULATION_OF_INTERLEUKIN_2_PRODUCTION	GOBP_POSITIVE_REGULATION_OF_INTERLEUKIN_2_PRODUCTION	GOBP_POSITIVE_REGULATION_OF_INTERLEUKIN_2_PRODUCTION	2/171	34/17872	0.0418052078716037	0.228262883082998	0.193895619786034	RPS3/MALT1	2
GOBP_REGULATION_OF_MAST_CELL_ACTIVATION_INVOLVED_IN_IMMUNE_RESPONSE	GOBP_REGULATION_OF_MAST_CELL_ACTIVATION_INVOLVED_IN_IMMUNE_RESPONSE	GOBP_REGULATION_OF_MAST_CELL_ACTIVATION_INVOLVED_IN_IMMUNE_RESPONSE	2/171	34/17872	0.0418052078716037	0.228262883082998	0.193895619786034	VAMP8/STXBP2	2
GOBP_NEGATIVE_REGULATION_OF_CELLULAR_CATABOLIC_PROCESS	GOBP_NEGATIVE_REGULATION_OF_CELLULAR_CATABOLIC_PROCESS	GOBP_NEGATIVE_REGULATION_OF_CELLULAR_CATABOLIC_PROCESS	6/171	267/17872	0.0436607896069069	0.237207350428297	0.201493407985976	TSPO/USP36/RPL11/APOC1/CST3/YBX1	6
GOBP_REGULATION_OF_PROTEASOMAL_UBIQUITIN_DEPENDENT_PROTEIN_CATABOLIC_PROCESS	GOBP_REGULATION_OF_PROTEASOMAL_UBIQUITIN_DEPENDENT_PROTEIN_CATABOLIC_PROCESS	GOBP_REGULATION_OF_PROTEASOMAL_UBIQUITIN_DEPENDENT_PROTEIN_CATABOLIC_PROCESS	4/171	138/17872	0.0436667015148137	0.237207350428297	0.201493407985976	RACK1/RPL11/GABARAP/ELOB	4
GOBP_MAINTENANCE_OF_BLOOD_BRAIN_BARRIER	GOBP_MAINTENANCE_OF_BLOOD_BRAIN_BARRIER	GOBP_MAINTENANCE_OF_BLOOD_BRAIN_BARRIER	2/171	35/17872	0.0440661867829801	0.238159238491221	0.20230197976705	ACTB/ACTG1	2
GOBP_NEGATIVE_REGULATION_OF_B_CELL_ACTIVATION	GOBP_NEGATIVE_REGULATION_OF_B_CELL_ACTIVATION	GOBP_NEGATIVE_REGULATION_OF_B_CELL_ACTIVATION	2/171	35/17872	0.0440661867829801	0.238159238491221	0.20230197976705	TYROBP/MNDA	2
GOBP_RESPONSE_TO_MONOSACCHARIDE	GOBP_RESPONSE_TO_MONOSACCHARIDE	GOBP_RESPONSE_TO_MONOSACCHARIDE	5/171	201/17872	0.0441856705645264	0.238198894109274	0.20233566483462	CYBA/GPX1/HIF1A/RACK1/SELENOT	5
GOBP_REGULATION_OF_CELLULAR_PH	GOBP_REGULATION_OF_CELLULAR_PH	GOBP_REGULATION_OF_CELLULAR_PH	3/171	83/17872	0.0453575076214467	0.243897078956842	0.207175930881172	GRN/ATP6V0E1/PPT1	3
GOBP_LIPOPROTEIN_METABOLIC_PROCESS	GOBP_LIPOPROTEIN_METABOLIC_PROCESS	GOBP_LIPOPROTEIN_METABOLIC_PROCESS	4/171	140/17872	0.0456218029881179	0.244082391805447	0.207333343024351	APOE/APOC1/DBI/PPT1	4
GOBP_POSITIVE_REGULATION_OF_CHEMOTAXIS	GOBP_POSITIVE_REGULATION_OF_CHEMOTAXIS	GOBP_POSITIVE_REGULATION_OF_CHEMOTAXIS	4/171	140/17872	0.0456218029881179	0.244082391805447	0.207333343024351	TMSB4X/AIF1/STX3/OXSR1	4
GOBP_ANTIGEN_PROCESSING_AND_PRESENTATION_OF_PEPTIDE_OR_POLYSACCHARIDE_ANTIGEN_VIA_MHC_CLASS_II	GOBP_ANTIGEN_PROCESSING_AND_PRESENTATION_OF_PEPTIDE_OR_POLYSACCHARIDE_ANTIGEN_VIA_MHC_CLASS_II	GOBP_ANTIGEN_PROCESSING_AND_PRESENTATION_OF_PEPTIDE_OR_POLYSACCHARIDE_ANTIGEN_VIA_MHC_CLASS_II	2/171	36/17872	0.0463716129447539	0.247470617825772	0.210211437681323	PYCARD/FCER1G	2
GOBP_REGULATION_OF_SMALL_MOLECULE_METABOLIC_PROCESS	GOBP_REGULATION_OF_SMALL_MOLECULE_METABOLIC_PROCESS	GOBP_REGULATION_OF_SMALL_MOLECULE_METABOLIC_PROCESS	7/171	342/17872	0.0466177907694006	0.248072632911105	0.210722813365861	TMSB4X/HIF1A/APOE/APOC1/RANBP2/SLC27A4/FABP5	7
GOBP_REGULATION_OF_POSTSYNAPSE_ORGANIZATION	GOBP_REGULATION_OF_POSTSYNAPSE_ORGANIZATION	GOBP_REGULATION_OF_POSTSYNAPSE_ORGANIZATION	3/171	84/17872	0.0467180099644266	0.248072632911105	0.210722813365861	APOE/HSPA8/CFL1	3
GOBP_T_CELL_PROLIFERATION	GOBP_T_CELL_PROLIFERATION	GOBP_T_CELL_PROLIFERATION	5/171	205/17872	0.0473783512432541	0.250951665936837	0.213168379133581	RPS3/AIF1/RPS6/PYCARD/MALT1	5
GOBP_CELLULAR_RESPONSE_TO_ACID_CHEMICAL	GOBP_CELLULAR_RESPONSE_TO_ACID_CHEMICAL	GOBP_CELLULAR_RESPONSE_TO_ACID_CHEMICAL	3/171	85/17872	0.0480985325336277	0.252250081731914	0.214271305425959	CYBA/LAMTOR2/LAMTOR4	3
GOBP_IRON_ION_HOMEOSTASIS	GOBP_IRON_ION_HOMEOSTASIS	GOBP_IRON_ION_HOMEOSTASIS	3/171	85/17872	0.0480985325336277	0.252250081731914	0.214271305425959	FTL/HIF1A/ATP6V1G1	3
GOBP_NUCLEOSIDE_TRIPHOSPHATE_BIOSYNTHETIC_PROCESS	GOBP_NUCLEOSIDE_TRIPHOSPHATE_BIOSYNTHETIC_PROCESS	GOBP_NUCLEOSIDE_TRIPHOSPHATE_BIOSYNTHETIC_PROCESS	3/171	85/17872	0.0480985325336277	0.252250081731914	0.214271305425959	TMSB4X/ATP5MG/ALDOA	3
GOBP_REGULATION_OF_PLASMA_LIPOPROTEIN_PARTICLE_LEVELS	GOBP_REGULATION_OF_PLASMA_LIPOPROTEIN_PARTICLE_LEVELS	GOBP_REGULATION_OF_PLASMA_LIPOPROTEIN_PARTICLE_LEVELS	3/171	85/17872	0.0480985325336277	0.252250081731914	0.214271305425959	APOE/APOC1/CD36	3
GOBP_CELL_REDOX_HOMEOSTASIS	GOBP_CELL_REDOX_HOMEOSTASIS	GOBP_CELL_REDOX_HOMEOSTASIS	2/171	37/17872	0.0487204398822512	0.252395644658296	0.214394952395837	GPX1/SELENOT	2
GOBP_MATURATION_OF_SSU_RRNA_FROM_TRICISTRONIC_RRNA_TRANSCRIPT_SSU_RRNA_5_8S_RRNA_LSU_RRNA	GOBP_MATURATION_OF_SSU_RRNA_FROM_TRICISTRONIC_RRNA_TRANSCRIPT_SSU_RRNA_5_8S_RRNA_LSU_RRNA	GOBP_MATURATION_OF_SSU_RRNA_FROM_TRICISTRONIC_RRNA_TRANSCRIPT_SSU_RRNA_5_8S_RRNA_LSU_RRNA	2/171	37/17872	0.0487204398822512	0.252395644658296	0.214394952395837	RPS14/RPS19	2
GOBP_NADP_METABOLIC_PROCESS	GOBP_NADP_METABOLIC_PROCESS	GOBP_NADP_METABOLIC_PROCESS	2/171	37/17872	0.0487204398822512	0.252395644658296	0.214394952395837	TKT/TALDO1	2
GOBP_POSITIVE_REGULATION_OF_ATP_METABOLIC_PROCESS	GOBP_POSITIVE_REGULATION_OF_ATP_METABOLIC_PROCESS	GOBP_POSITIVE_REGULATION_OF_ATP_METABOLIC_PROCESS	2/171	37/17872	0.0487204398822512	0.252395644658296	0.214394952395837	TMSB4X/HIF1A	2
GOBP_PROTEIN_TARGETING_TO_VACUOLE	GOBP_PROTEIN_TARGETING_TO_VACUOLE	GOBP_PROTEIN_TARGETING_TO_VACUOLE	2/171	37/17872	0.0487204398822512	0.252395644658296	0.214394952395837	HSPA8/ZFYVE16	2
GOBP_NEGATIVE_REGULATION_OF_NEURON_APOPTOTIC_PROCESS	GOBP_NEGATIVE_REGULATION_OF_NEURON_APOPTOTIC_PROCESS	GOBP_NEGATIVE_REGULATION_OF_NEURON_APOPTOTIC_PROCESS	4/171	145/17872	0.0507206357975097	0.26123764956081	0.221905704900004	HIF1A/GRN/APOE/PPT1	4
GOBP_NEGATIVE_REGULATION_OF_PROTEIN_CONTAINING_COMPLEX_ASSEMBLY	GOBP_NEGATIVE_REGULATION_OF_PROTEIN_CONTAINING_COMPLEX_ASSEMBLY	GOBP_NEGATIVE_REGULATION_OF_PROTEIN_CONTAINING_COMPLEX_ASSEMBLY	4/171	145/17872	0.0507206357975097	0.26123764956081	0.221905704900004	TMSB4X/TMSB10/PFN1/CAPG	4
GOBP_POSITIVE_REGULATION_OF_LIPID_TRANSPORT	GOBP_POSITIVE_REGULATION_OF_LIPID_TRANSPORT	GOBP_POSITIVE_REGULATION_OF_LIPID_TRANSPORT	3/171	87/17872	0.0509192028804968	0.26123764956081	0.221905704900004	APOE/EEPD1/DBI	3
GOBP_POSITIVE_REGULATION_OF_NEURON_DEATH	GOBP_POSITIVE_REGULATION_OF_NEURON_DEATH	GOBP_POSITIVE_REGULATION_OF_NEURON_DEATH	3/171	87/17872	0.0509192028804968	0.26123764956081	0.221905704900004	TYROBP/GRN/ITGB2	3
GOBP_SKELETAL_MUSCLE_TISSUE_REGENERATION	GOBP_SKELETAL_MUSCLE_TISSUE_REGENERATION	GOBP_SKELETAL_MUSCLE_TISSUE_REGENERATION	2/171	38/17872	0.0511116368686381	0.261593052310813	0.22220759820633	GPX1/CD9	2
GOBP_PROTEIN_IMPORT	GOBP_PROTEIN_IMPORT	GOBP_PROTEIN_IMPORT	5/171	210/17872	0.0515574179212306	0.263240278040129	0.223606817603718	APOE/HSPA8/RANBP2/HSP90AA1/CD36	5
GOBP_NEGATIVE_REGULATION_OF_ORGANELLE_ORGANIZATION	GOBP_NEGATIVE_REGULATION_OF_ORGANELLE_ORGANIZATION	GOBP_NEGATIVE_REGULATION_OF_ORGANELLE_ORGANIZATION	7/171	351/17872	0.0522384066897446	0.266077639829779	0.22601698615732	TMSB4X/TMSB10/GPX1/PFN1/TSPO/GMFG/CAPG	7
GOBP_PROTEIN_FOLDING	GOBP_PROTEIN_FOLDING	GOBP_PROTEIN_FOLDING	5/171	211/17872	0.05241837612851	0.266355576308505	0.226253076515402	GRN/PFDN5/HSPA8/RANBP2/HSP90AA1	5
GOBP_ARP2_3_COMPLEX_MEDIATED_ACTIN_NUCLEATION	GOBP_ARP2_3_COMPLEX_MEDIATED_ACTIN_NUCLEATION	GOBP_ARP2_3_COMPLEX_MEDIATED_ACTIN_NUCLEATION	2/171	39/17872	0.0535441887222975	0.270137427188028	0.229465531866528	GMFG/ARPC2	2
GOBP_POSITIVE_REGULATION_OF_STEROL_TRANSPORT	GOBP_POSITIVE_REGULATION_OF_STEROL_TRANSPORT	GOBP_POSITIVE_REGULATION_OF_STEROL_TRANSPORT	2/171	39/17872	0.0535441887222975	0.270137427188028	0.229465531866528	APOE/EEPD1	2
GOBP_REGULATION_OF_ACTIN_CYTOSKELETON_REORGANIZATION	GOBP_REGULATION_OF_ACTIN_CYTOSKELETON_REORGANIZATION	GOBP_REGULATION_OF_ACTIN_CYTOSKELETON_REORGANIZATION	2/171	39/17872	0.0535441887222975	0.270137427188028	0.229465531866528	GMFG/ARHGDIB	2
GOBP_REGULATION_OF_ATP_METABOLIC_PROCESS	GOBP_REGULATION_OF_ATP_METABOLIC_PROCESS	GOBP_REGULATION_OF_ATP_METABOLIC_PROCESS	3/171	89/17872	0.0538186134126513	0.270238143944377	0.229551084706443	TMSB4X/HIF1A/TSPO	3
GOBP_RIBONUCLEOSIDE_TRIPHOSPHATE_METABOLIC_PROCESS	GOBP_RIBONUCLEOSIDE_TRIPHOSPHATE_METABOLIC_PROCESS	GOBP_RIBONUCLEOSIDE_TRIPHOSPHATE_METABOLIC_PROCESS	3/171	89/17872	0.0538186134126513	0.270238143944377	0.229551084706443	TMSB4X/ATP5MG/ALDOA	3
GOBP_REGULATION_OF_SYNAPSE_STRUCTURE_OR_ACTIVITY	GOBP_REGULATION_OF_SYNAPSE_STRUCTURE_OR_ACTIVITY	GOBP_REGULATION_OF_SYNAPSE_STRUCTURE_OR_ACTIVITY	5/171	213/17872	0.0541654582274128	0.271338286026002	0.230485589378812	APOE/TUBA1A/HSPA8/CFL1/PPT1	5
GOBP_NEGATIVE_REGULATION_OF_RESPONSE_TO_EXTERNAL_STIMULUS	GOBP_NEGATIVE_REGULATION_OF_RESPONSE_TO_EXTERNAL_STIMULUS	GOBP_NEGATIVE_REGULATION_OF_RESPONSE_TO_EXTERNAL_STIMULUS	8/171	429/17872	0.0544778898823387	0.271622155187998	0.230726719195277	GPX1/AIF1/GRN/APOE/CARD16/GSTP1/RPS19/CD9	8
GOBP_POSITIVE_REGULATION_OF_CELL_ACTIVATION	GOBP_POSITIVE_REGULATION_OF_CELL_ACTIVATION	GOBP_POSITIVE_REGULATION_OF_CELL_ACTIVATION	8/171	429/17872	0.0544778898823387	0.271622155187998	0.230726719195277	TYROBP/VAMP8/RPS3/AIF1/PYCARD/ITGB2/LGALS1/MALT1	8
GOBP_ADP_METABOLIC_PROCESS	GOBP_ADP_METABOLIC_PROCESS	GOBP_ADP_METABOLIC_PROCESS	3/171	90/17872	0.0552975489179532	0.274420546499375	0.233103784666433	HIF1A/ALDOA/TPI1	3
GOBP_MIDBRAIN_DEVELOPMENT	GOBP_MIDBRAIN_DEVELOPMENT	GOBP_MIDBRAIN_DEVELOPMENT	3/171	90/17872	0.0552975489179532	0.274420546499375	0.233103784666433	ACTB/DYNLL1/COX6B1	3
GOBP_CELLULAR_RESPONSE_TO_OSMOTIC_STRESS	GOBP_CELLULAR_RESPONSE_TO_OSMOTIC_STRESS	GOBP_CELLULAR_RESPONSE_TO_OSMOTIC_STRESS	2/171	40/17872	0.056017095606605	0.276698397833556	0.235038682667616	TSPO/OXSR1	2
GOBP_REGULATION_OF_RESPONSE_TO_REACTIVE_OXYGEN_SPECIES	GOBP_REGULATION_OF_RESPONSE_TO_REACTIVE_OXYGEN_SPECIES	GOBP_REGULATION_OF_RESPONSE_TO_REACTIVE_OXYGEN_SPECIES	2/171	40/17872	0.056017095606605	0.276698397833556	0.235038682667616	RACK1/CD36	2
GOBP_PROTEIN_LOCALIZATION_TO_PLASMA_MEMBRANE	GOBP_PROTEIN_LOCALIZATION_TO_PLASMA_MEMBRANE	GOBP_PROTEIN_LOCALIZATION_TO_PLASMA_MEMBRANE	6/171	285/17872	0.0565247321392044	0.277579958480152	0.23578751552928	VAMP8/ACTB/RACK1/TMEM59/EZR/STX3	6
GOBP_REGULATION_OF_LEUKOCYTE_DIFFERENTIATION	GOBP_REGULATION_OF_LEUKOCYTE_DIFFERENTIATION	GOBP_REGULATION_OF_LEUKOCYTE_DIFFERENTIATION	6/171	285/17872	0.0565247321392044	0.277579958480152	0.23578751552928	TYROBP/LGALS1/TMEM176B/C1QC/TMEM176A/MALT1	6
GOBP_BODY_FLUID_SECRETION	GOBP_BODY_FLUID_SECRETION	GOBP_BODY_FLUID_SECRETION	3/171	91/17872	0.0567958064122113	0.277579958480152	0.23578751552928	CYBA/VAMP8/HIF1A	3
GOBP_NEGATIVE_REGULATION_OF_LEUKOCYTE_PROLIFERATION	GOBP_NEGATIVE_REGULATION_OF_LEUKOCYTE_PROLIFERATION	GOBP_NEGATIVE_REGULATION_OF_LEUKOCYTE_PROLIFERATION	3/171	91/17872	0.0567958064122113	0.277579958480152	0.23578751552928	TYROBP/MNDA/GSTP1	3
GOBP_NEGATIVE_REGULATION_OF_CELL_ACTIVATION	GOBP_NEGATIVE_REGULATION_OF_CELL_ACTIVATION	GOBP_NEGATIVE_REGULATION_OF_CELL_ACTIVATION	5/171	216/17872	0.0568490027960764	0.277579958480152	0.23578751552928	TYROBP/GRN/APOE/MNDA/CD9	5
GOBP_HOMOTYPIC_CELL_CELL_ADHESION	GOBP_HOMOTYPIC_CELL_CELL_ADHESION	GOBP_HOMOTYPIC_CELL_CELL_ADHESION	3/171	92/17872	0.0583132585350234	0.282537245216669	0.23999843309613	ACTB/ACTG1/CD9	3
GOBP_INTESTINAL_ABSORPTION	GOBP_INTESTINAL_ABSORPTION	GOBP_INTESTINAL_ABSORPTION	2/171	41/17872	0.0585293728320783	0.282537245216669	0.23999843309613	CD36/EZR	2
GOBP_REGULATION_OF_PROTEIN_LOCALIZATION_TO_CELL_SURFACE	GOBP_REGULATION_OF_PROTEIN_LOCALIZATION_TO_CELL_SURFACE	GOBP_REGULATION_OF_PROTEIN_LOCALIZATION_TO_CELL_SURFACE	2/171	41/17872	0.0585293728320783	0.282537245216669	0.23999843309613	TYROBP/STX3	2
GOBP_SECRETION_BY_TISSUE	GOBP_SECRETION_BY_TISSUE	GOBP_SECRETION_BY_TISSUE	2/171	41/17872	0.0585293728320783	0.282537245216669	0.23999843309613	CYBA/VAMP8	2
GOBP_ZINC_ION_HOMEOSTASIS	GOBP_ZINC_ION_HOMEOSTASIS	GOBP_ZINC_ION_HOMEOSTASIS	2/171	41/17872	0.0585293728320783	0.282537245216669	0.23999843309613	S100A9/S100A8	2
GOBP_POSITIVE_REGULATION_OF_PROTEASOMAL_UBIQUITIN_DEPENDENT_PROTEIN_CATABOLIC_PROCESS	GOBP_POSITIVE_REGULATION_OF_PROTEASOMAL_UBIQUITIN_DEPENDENT_PROTEIN_CATABOLIC_PROCESS	GOBP_POSITIVE_REGULATION_OF_PROTEASOMAL_UBIQUITIN_DEPENDENT_PROTEIN_CATABOLIC_PROCESS	3/171	93/17872	0.0598497750607085	0.287603896445577	0.244302249235662	RACK1/GABARAP/ELOB	3
GOBP_REGULATION_OF_PH	GOBP_REGULATION_OF_PH	GOBP_REGULATION_OF_PH	3/171	93/17872	0.0598497750607085	0.287603896445577	0.244302249235662	GRN/ATP6V0E1/PPT1	3
GOBP_ENTRY_INTO_HOST	GOBP_ENTRY_INTO_HOST	GOBP_ENTRY_INTO_HOST	4/171	154/17872	0.0606534293957634	0.290152891974328	0.24646746795718	VAMP8/ANPEP/LGALS1/FCN1	4
GOBP_GRANULOCYTE_MIGRATION	GOBP_GRANULOCYTE_MIGRATION	GOBP_GRANULOCYTE_MIGRATION	4/171	154/17872	0.0606534293957634	0.290152891974328	0.24646746795718	ITGB2/S100A9/FCER1G/S100A8	4
GOBP_POSITIVE_REGULATION_OF_SMOOTH_MUSCLE_CELL_MIGRATION	GOBP_POSITIVE_REGULATION_OF_SMOOTH_MUSCLE_CELL_MIGRATION	GOBP_POSITIVE_REGULATION_OF_SMOOTH_MUSCLE_CELL_MIGRATION	2/171	42/17872	0.0610800506608718	0.290232723945619	0.246535280425608	AIF1/S100A11	2
GOBP_REGULATION_OF_DEFENSE_RESPONSE_TO_VIRUS_BY_HOST	GOBP_REGULATION_OF_DEFENSE_RESPONSE_TO_VIRUS_BY_HOST	GOBP_REGULATION_OF_DEFENSE_RESPONSE_TO_VIRUS_BY_HOST	2/171	42/17872	0.0610800506608718	0.290232723945619	0.246535280425608	PYCARD/HSP90AA1	2
GOBP_RESPONSE_TO_ELECTRICAL_STIMULUS	GOBP_RESPONSE_TO_ELECTRICAL_STIMULUS	GOBP_RESPONSE_TO_ELECTRICAL_STIMULUS	2/171	42/17872	0.0610800506608718	0.290232723945619	0.246535280425608	AIF1/CD14	2
GOBP_POSITIVE_REGULATION_OF_CELL_CELL_ADHESION	GOBP_POSITIVE_REGULATION_OF_CELL_CELL_ADHESION	GOBP_POSITIVE_REGULATION_OF_CELL_CELL_ADHESION	6/171	291/17872	0.0612706442920571	0.290478159565487	0.246743763254656	RPS3/AIF1/PYCARD/ITGB2/LGALS1/MALT1	6
GOBP_MITOCHONDRIAL_RESPIRATORY_CHAIN_COMPLEX_ASSEMBLY	GOBP_MITOCHONDRIAL_RESPIRATORY_CHAIN_COMPLEX_ASSEMBLY	GOBP_MITOCHONDRIAL_RESPIRATORY_CHAIN_COMPLEX_ASSEMBLY	3/171	94/17872	0.0614052229966589	0.290478159565487	0.246743763254656	TTC19/NDUFB10/COX14	3
GOBP_NEGATIVE_REGULATION_OF_CYTOKINE_PRODUCTION	GOBP_NEGATIVE_REGULATION_OF_CYTOKINE_PRODUCTION	GOBP_NEGATIVE_REGULATION_OF_CYTOKINE_PRODUCTION	7/171	365/17872	0.0617997221640881	0.291126698082306	0.247294657802098	TMSB4X/TYROBP/TSPO/PYCARD/EZR/CARD16/GSTP1	7
GOBP_PROTEIN_CONTAINING_COMPLEX_LOCALIZATION	GOBP_PROTEIN_CONTAINING_COMPLEX_LOCALIZATION	GOBP_PROTEIN_CONTAINING_COMPLEX_LOCALIZATION	4/171	155/17872	0.0618164504873447	0.291126698082306	0.247294657802098	TYROBP/RPS15/EZR/STX3	4
GOBP_REGULATION_OF_BINDING	GOBP_REGULATION_OF_BINDING	GOBP_REGULATION_OF_BINDING	7/171	367/17872	0.0632477207300071	0.296559653108044	0.251909627033	TMSB4X/ACTB/RACK1/APOE/RPL11/CARD16/EDF1	7
GOBP_POSITIVE_REGULATION_OF_NUCLEOTIDE_METABOLIC_PROCESS	GOBP_POSITIVE_REGULATION_OF_NUCLEOTIDE_METABOLIC_PROCESS	GOBP_POSITIVE_REGULATION_OF_NUCLEOTIDE_METABOLIC_PROCESS	2/171	43/17872	0.0636681741135913	0.296559653108044	0.251909627033	TMSB4X/HIF1A	2
GOBP_RAC_PROTEIN_SIGNAL_TRANSDUCTION	GOBP_RAC_PROTEIN_SIGNAL_TRANSDUCTION	GOBP_RAC_PROTEIN_SIGNAL_TRANSDUCTION	2/171	43/17872	0.0636681741135913	0.296559653108044	0.251909627033	AIF1/GABARAP	2
GOBP_REGULATION_OF_VIRAL_ENTRY_INTO_HOST_CELL	GOBP_REGULATION_OF_VIRAL_ENTRY_INTO_HOST_CELL	GOBP_REGULATION_OF_VIRAL_ENTRY_INTO_HOST_CELL	2/171	43/17872	0.0636681741135913	0.296559653108044	0.251909627033	LGALS1/FCN1	2
GOBP_TRANSFORMING_GROWTH_FACTOR_BETA_PRODUCTION	GOBP_TRANSFORMING_GROWTH_FACTOR_BETA_PRODUCTION	GOBP_TRANSFORMING_GROWTH_FACTOR_BETA_PRODUCTION	2/171	43/17872	0.0636681741135913	0.296559653108044	0.251909627033	TYROBP/HIF1A	2
GOBP_MORPHOGENESIS_OF_A_POLARIZED_EPITHELIUM	GOBP_MORPHOGENESIS_OF_A_POLARIZED_EPITHELIUM	GOBP_MORPHOGENESIS_OF_A_POLARIZED_EPITHELIUM	3/171	96/17872	0.0645723678711783	0.300113149580706	0.254928109020384	ACTB/ACTG1/EZR	3
GOBP_RESPONSE_TO_TOPOLOGICALLY_INCORRECT_PROTEIN	GOBP_RESPONSE_TO_TOPOLOGICALLY_INCORRECT_PROTEIN	GOBP_RESPONSE_TO_TOPOLOGICALLY_INCORRECT_PROTEIN	4/171	158/17872	0.065376038599171	0.303184947564714	0.257537417051205	RACK1/HSPA8/HSP90AA1/SERP1	4
GOBP_CELLULAR_RESPONSE_TO_UNFOLDED_PROTEIN	GOBP_CELLULAR_RESPONSE_TO_UNFOLDED_PROTEIN	GOBP_CELLULAR_RESPONSE_TO_UNFOLDED_PROTEIN	3/171	97/17872	0.0661837858487218	0.305596437266707	0.259585832825422	RACK1/HSPA8/SERP1	3
GOBP_NEGATIVE_REGULATION_OF_PROTEIN_BINDING	GOBP_NEGATIVE_REGULATION_OF_PROTEIN_BINDING	GOBP_NEGATIVE_REGULATION_OF_PROTEIN_BINDING	3/171	97/17872	0.0661837858487218	0.305596437266707	0.259585832825422	ACTB/RACK1/CARD16	3
GOBP_RESPONSE_TO_CARBOHYDRATE	GOBP_RESPONSE_TO_CARBOHYDRATE	GOBP_RESPONSE_TO_CARBOHYDRATE	5/171	227/17872	0.0673335377566596	0.310230876779056	0.263522511051295	CYBA/GPX1/HIF1A/RACK1/SELENOT	5
GOBP_LONG_TERM_SYNAPTIC_POTENTIATION	GOBP_LONG_TERM_SYNAPTIC_POTENTIATION	GOBP_LONG_TERM_SYNAPTIC_POTENTIATION	3/171	98/17872	0.0678135774981817	0.310683191416253	0.263906725189542	TYROBP/APOE/STX3	3
GOBP_TYPE_I_INTERFERON_PRODUCTION	GOBP_TYPE_I_INTERFERON_PRODUCTION	GOBP_TYPE_I_INTERFERON_PRODUCTION	3/171	98/17872	0.0678135774981817	0.310683191416253	0.263906725189542	PYCARD/CD14/HSP90AA1	3
GOBP_REGULATION_OF_HEMOPOIESIS	GOBP_REGULATION_OF_HEMOPOIESIS	GOBP_REGULATION_OF_HEMOPOIESIS	7/171	374/17872	0.0684782563363136	0.310683191416253	0.263906725189542	TYROBP/HIF1A/LGALS1/TMEM176B/C1QC/TMEM176A/MALT1	7
GOBP_LEUKOCYTE_MEDIATED_IMMUNITY	GOBP_LEUKOCYTE_MEDIATED_IMMUNITY	GOBP_LEUKOCYTE_MEDIATED_IMMUNITY	8/171	451/17872	0.0686691614097401	0.310683191416253	0.263906725189542	TYROBP/VAMP8/ITGB2/FCER1G/STXBP2/C1QB/C1QC/MALT1	8
GOBP_REGULATION_OF_DNA_BINDING_TRANSCRIPTION_FACTOR_ACTIVITY	GOBP_REGULATION_OF_DNA_BINDING_TRANSCRIPTION_FACTOR_ACTIVITY	GOBP_REGULATION_OF_DNA_BINDING_TRANSCRIPTION_FACTOR_ACTIVITY	8/171	451/17872	0.0686691614097401	0.310683191416253	0.263906725189542	TMSB4X/RPS3/PYCARD/S100A9/S100A8/CD36/CARD16/MALT1	8
GOBP_INTRINSIC_APOPTOTIC_SIGNALING_PATHWAY_IN_RESPONSE_TO_OXIDATIVE_STRESS	GOBP_INTRINSIC_APOPTOTIC_SIGNALING_PATHWAY_IN_RESPONSE_TO_OXIDATIVE_STRESS	GOBP_INTRINSIC_APOPTOTIC_SIGNALING_PATHWAY_IN_RESPONSE_TO_OXIDATIVE_STRESS	2/171	45/17872	0.0689530106224037	0.310683191416253	0.263906725189542	GPX1/HIF1A	2
GOBP_NEGATIVE_REGULATION_OF_INTERLEUKIN_1_BETA_PRODUCTION	GOBP_NEGATIVE_REGULATION_OF_INTERLEUKIN_1_BETA_PRODUCTION	GOBP_NEGATIVE_REGULATION_OF_INTERLEUKIN_1_BETA_PRODUCTION	2/171	45/17872	0.0689530106224037	0.310683191416253	0.263906725189542	CARD16/GSTP1	2
GOBP_REGULATION_OF_LONG_TERM_SYNAPTIC_POTENTIATION	GOBP_REGULATION_OF_LONG_TERM_SYNAPTIC_POTENTIATION	GOBP_REGULATION_OF_LONG_TERM_SYNAPTIC_POTENTIATION	2/171	45/17872	0.0689530106224037	0.310683191416253	0.263906725189542	TYROBP/APOE	2
GOBP_REGULATION_OF_MAST_CELL_ACTIVATION	GOBP_REGULATION_OF_MAST_CELL_ACTIVATION	GOBP_REGULATION_OF_MAST_CELL_ACTIVATION	2/171	45/17872	0.0689530106224037	0.310683191416253	0.263906725189542	VAMP8/STXBP2	2
GOBP_RUFFLE_ASSEMBLY	GOBP_RUFFLE_ASSEMBLY	GOBP_RUFFLE_ASSEMBLY	2/171	45/17872	0.0689530106224037	0.310683191416253	0.263906725189542	PFN1/AIF1	2
GOBP_MYELOID_CELL_HOMEOSTASIS	GOBP_MYELOID_CELL_HOMEOSTASIS	GOBP_MYELOID_CELL_HOMEOSTASIS	4/171	161/17872	0.0690407092036117	0.310683191416253	0.263906725189542	HIF1A/RPS14/RPS6/RPS19	4
GOBP_CELL_DEATH_IN_RESPONSE_TO_OXIDATIVE_STRESS	GOBP_CELL_DEATH_IN_RESPONSE_TO_OXIDATIVE_STRESS	GOBP_CELL_DEATH_IN_RESPONSE_TO_OXIDATIVE_STRESS	3/171	99/17872	0.0694615974023008	0.311916348588767	0.264954218198606	GPX1/HIF1A/RACK1	3
GOBP_NUCLEOTIDE_PHOSPHORYLATION	GOBP_NUCLEOTIDE_PHOSPHORYLATION	GOBP_NUCLEOTIDE_PHOSPHORYLATION	3/171	100/17872	0.0711276979282288	0.318724114767	0.270737006993081	HIF1A/ALDOA/TPI1	3
GOBP_REGULATION_OF_RELEASE_OF_CYTOCHROME_C_FROM_MITOCHONDRIA	GOBP_REGULATION_OF_RELEASE_OF_CYTOCHROME_C_FROM_MITOCHONDRIA	GOBP_REGULATION_OF_RELEASE_OF_CYTOCHROME_C_FROM_MITOCHONDRIA	2/171	46/17872	0.0716478858052498	0.320379177790212	0.27214288370127	GPX1/PYCARD	2
GOBP_ACTIN_FILAMENT_BUNDLE_ORGANIZATION	GOBP_ACTIN_FILAMENT_BUNDLE_ORGANIZATION	GOBP_ACTIN_FILAMENT_BUNDLE_ORGANIZATION	4/171	164/17872	0.0728094671258464	0.32421826637581	0.275403959048537	PFN1/AIF1/ACTG1/EZR	4
GOBP_PROTEIN_TARGETING_TO_MITOCHONDRION	GOBP_PROTEIN_TARGETING_TO_MITOCHONDRION	GOBP_PROTEIN_TARGETING_TO_MITOCHONDRION	3/171	101/17872	0.0728117293132116	0.32421826637581	0.275403959048537	TSPO/USP36/HSP90AA1	3
GOBP_REGULATION_OF_CELL_CELL_ADHESION	GOBP_REGULATION_OF_CELL_CELL_ADHESION	GOBP_REGULATION_OF_CELL_CELL_ADHESION	8/171	458/17872	0.0736214052813912	0.327137792505596	0.277883921277922	RPS3/AIF1/PYCARD/ITGB2/LGALS1/CD9/MALT1/FXYD5	8
GOBP_ESTABLISHMENT_OF_PROTEIN_LOCALIZATION_TO_ENDOPLASMIC_RETICULUM	GOBP_ESTABLISHMENT_OF_PROTEIN_LOCALIZATION_TO_ENDOPLASMIC_RETICULUM	GOBP_ESTABLISHMENT_OF_PROTEIN_LOCALIZATION_TO_ENDOPLASMIC_RETICULUM	2/171	47/17872	0.0743765304949808	0.32835427059335	0.278917246405492	SRP14/SEC62	2
GOBP_POSITIVE_REGULATION_OF_TOR_SIGNALING	GOBP_POSITIVE_REGULATION_OF_TOR_SIGNALING	GOBP_POSITIVE_REGULATION_OF_TOR_SIGNALING	2/171	47/17872	0.0743765304949808	0.32835427059335	0.278917246405492	LAMTOR2/LAMTOR4	2
GOBP_REGULATION_OF_MEMBRANE_DEPOLARIZATION	GOBP_REGULATION_OF_MEMBRANE_DEPOLARIZATION	GOBP_REGULATION_OF_MEMBRANE_DEPOLARIZATION	2/171	47/17872	0.0743765304949808	0.32835427059335	0.278917246405492	TSPO/RACK1	2
GOBP_NEGATIVE_REGULATION_OF_SMALL_MOLECULE_METABOLIC_PROCESS	GOBP_NEGATIVE_REGULATION_OF_SMALL_MOLECULE_METABOLIC_PROCESS	GOBP_NEGATIVE_REGULATION_OF_SMALL_MOLECULE_METABOLIC_PROCESS	3/171	102/17872	0.0745135397485851	0.32835427059335	0.278917246405492	APOE/APOC1/SLC27A4	3
GOBP_NEGATIVE_REGULATION_OF_BINDING	GOBP_NEGATIVE_REGULATION_OF_BINDING	GOBP_NEGATIVE_REGULATION_OF_BINDING	4/171	166/17872	0.0753792605273024	0.331481468654224	0.281573613476727	TMSB4X/ACTB/RACK1/CARD16	4
GOBP_POSITIVE_REGULATION_OF_T_CELL_PROLIFERATION	GOBP_POSITIVE_REGULATION_OF_T_CELL_PROLIFERATION	GOBP_POSITIVE_REGULATION_OF_T_CELL_PROLIFERATION	3/171	103/17872	0.0762329754620972	0.333853278106174	0.283588323259977	RPS3/AIF1/PYCARD	3
GOBP_REGULATION_OF_SIGNAL_TRANSDUCTION_BY_P53_CLASS_MEDIATOR	GOBP_REGULATION_OF_SIGNAL_TRANSDUCTION_BY_P53_CLASS_MEDIATOR	GOBP_REGULATION_OF_SIGNAL_TRANSDUCTION_BY_P53_CLASS_MEDIATOR	3/171	103/17872	0.0762329754620972	0.333853278106174	0.283588323259977	RPS15/RPS20/RPL11	3
GOBP_RESPONSE_TO_ALCOHOL	GOBP_RESPONSE_TO_ALCOHOL	GOBP_RESPONSE_TO_ALCOHOL	5/171	236/17872	0.076660485781967	0.335034715639708	0.284591883539726	CYBA/TSPO/RPL27/CD14/S100A8	5
GOBP_NEGATIVE_REGULATION_OF_MITOCHONDRION_ORGANIZATION	GOBP_NEGATIVE_REGULATION_OF_MITOCHONDRION_ORGANIZATION	GOBP_NEGATIVE_REGULATION_OF_MITOCHONDRION_ORGANIZATION	2/171	48/17872	0.0771380606860522	0.335053662366411	0.284607977646956	GPX1/TSPO	2
GOBP_REGULATION_OF_REACTIVE_OXYGEN_SPECIES_BIOSYNTHETIC_PROCESS	GOBP_REGULATION_OF_REACTIVE_OXYGEN_SPECIES_BIOSYNTHETIC_PROCESS	GOBP_REGULATION_OF_REACTIVE_OXYGEN_SPECIES_BIOSYNTHETIC_PROCESS	2/171	48/17872	0.0771380606860522	0.335053662366411	0.284607977646956	CYBA/CD36	2
GOBP_VASODILATION	GOBP_VASODILATION	GOBP_VASODILATION	2/171	48/17872	0.0771380606860522	0.335053662366411	0.284607977646956	GPX1/APOE	2
GOBP_REGULATION_OF_LEUKOCYTE_MEDIATED_IMMUNITY	GOBP_REGULATION_OF_LEUKOCYTE_MEDIATED_IMMUNITY	GOBP_REGULATION_OF_LEUKOCYTE_MEDIATED_IMMUNITY	5/171	237/17872	0.0777380014946529	0.336707873245893	0.286013130510189	TYROBP/VAMP8/ITGB2/STXBP2/MALT1	5
GOBP_REGULATION_OF_STEROID_METABOLIC_PROCESS	GOBP_REGULATION_OF_STEROID_METABOLIC_PROCESS	GOBP_REGULATION_OF_STEROID_METABOLIC_PROCESS	3/171	104/17872	0.0779698807985873	0.336707873245893	0.286013130510189	TSPO/APOE/APOC1	3
GOBP_REGULATION_OF_UBIQUITIN_DEPENDENT_PROTEIN_CATABOLIC_PROCESS	GOBP_REGULATION_OF_UBIQUITIN_DEPENDENT_PROTEIN_CATABOLIC_PROCESS	GOBP_REGULATION_OF_UBIQUITIN_DEPENDENT_PROTEIN_CATABOLIC_PROCESS	4/171	168/17872	0.0779944791134553	0.336707873245893	0.286013130510189	RACK1/RPL11/GABARAP/ELOB	4
GOBP_NEGATIVE_REGULATION_OF_TRANSPORT	GOBP_NEGATIVE_REGULATION_OF_TRANSPORT	GOBP_NEGATIVE_REGULATION_OF_TRANSPORT	8/171	466/17872	0.079541116497068	0.340913114830273	0.289585230854935	OAZ1/VAMP8/RACK1/APOE/APOC1/CD36/FABP5/OXSR1	8
GOBP_HUMORAL_IMMUNE_RESPONSE	GOBP_HUMORAL_IMMUNE_RESPONSE	GOBP_HUMORAL_IMMUNE_RESPONSE	6/171	312/17872	0.0796949053414254	0.340913114830273	0.289585230854935	S100A9/CFD/FCN1/C1QB/C1QC/RPS19	6
GOBP_PEPTIDYL_CYSTEINE_MODIFICATION	GOBP_PEPTIDYL_CYSTEINE_MODIFICATION	GOBP_PEPTIDYL_CYSTEINE_MODIFICATION	2/171	49/17872	0.0799316060195273	0.340913114830273	0.289585230854935	S100A9/S100A8	2
GOBP_PROTEIN_LIPID_COMPLEX_SUBUNIT_ORGANIZATION	GOBP_PROTEIN_LIPID_COMPLEX_SUBUNIT_ORGANIZATION	GOBP_PROTEIN_LIPID_COMPLEX_SUBUNIT_ORGANIZATION	2/171	49/17872	0.0799316060195273	0.340913114830273	0.289585230854935	APOE/APOC1	2
GOBP_REGULATION_OF_FATTY_ACID_BIOSYNTHETIC_PROCESS	GOBP_REGULATION_OF_FATTY_ACID_BIOSYNTHETIC_PROCESS	GOBP_REGULATION_OF_FATTY_ACID_BIOSYNTHETIC_PROCESS	2/171	49/17872	0.0799316060195273	0.340913114830273	0.289585230854935	APOC1/FABP5	2
GOBP_SPERM_EGG_RECOGNITION	GOBP_SPERM_EGG_RECOGNITION	GOBP_SPERM_EGG_RECOGNITION	2/171	49/17872	0.0799316060195273	0.340913114830273	0.289585230854935	ALDOA/CD9	2
GOBP_NEGATIVE_REGULATION_OF_HEMOPOIESIS	GOBP_NEGATIVE_REGULATION_OF_HEMOPOIESIS	GOBP_NEGATIVE_REGULATION_OF_HEMOPOIESIS	3/171	106/17872	0.0814954687780843	0.34533281257741	0.293339498839172	TMEM176B/C1QC/TMEM176A	3
GOBP_PYRUVATE_METABOLIC_PROCESS	GOBP_PYRUVATE_METABOLIC_PROCESS	GOBP_PYRUVATE_METABOLIC_PROCESS	3/171	106/17872	0.0814954687780843	0.34533281257741	0.293339498839172	HIF1A/ALDOA/TPI1	3
GOBP_SIGNAL_TRANSDUCTION_BY_P53_CLASS_MEDIATOR	GOBP_SIGNAL_TRANSDUCTION_BY_P53_CLASS_MEDIATOR	GOBP_SIGNAL_TRANSDUCTION_BY_P53_CLASS_MEDIATOR	4/171	171/17872	0.0820016677770919	0.34533281257741	0.293339498839172	RPS15/PYCARD/RPS20/RPL11	4
GOBP_RESPONSE_TO_VIRUS	GOBP_RESPONSE_TO_VIRUS	GOBP_RESPONSE_TO_VIRUS	7/171	391/17872	0.0822355593005703	0.34533281257741	0.293339498839172	NPC2/VAMP8/HIF1A/EEF1G/PYCARD/HSP90AA1/CFL1	7
GOBP_ACTIVATED_T_CELL_PROLIFERATION	GOBP_ACTIVATED_T_CELL_PROLIFERATION	GOBP_ACTIVATED_T_CELL_PROLIFERATION	2/171	50/17872	0.0827563096054152	0.34533281257741	0.293339498839172	RPS3/PYCARD	2
GOBP_ESTABLISHMENT_OF_PROTEIN_LOCALIZATION_TO_VACUOLE	GOBP_ESTABLISHMENT_OF_PROTEIN_LOCALIZATION_TO_VACUOLE	GOBP_ESTABLISHMENT_OF_PROTEIN_LOCALIZATION_TO_VACUOLE	2/171	50/17872	0.0827563096054152	0.34533281257741	0.293339498839172	HSPA8/ZFYVE16	2
GOBP_MATURATION_OF_SSU_RRNA	GOBP_MATURATION_OF_SSU_RRNA	GOBP_MATURATION_OF_SSU_RRNA	2/171	50/17872	0.0827563096054152	0.34533281257741	0.293339498839172	RPS14/RPS19	2
GOBP_NEGATIVE_REGULATION_OF_STRESS_ACTIVATED_PROTEIN_KINASE_SIGNALING_CASCADE	GOBP_NEGATIVE_REGULATION_OF_STRESS_ACTIVATED_PROTEIN_KINASE_SIGNALING_CASCADE	GOBP_NEGATIVE_REGULATION_OF_STRESS_ACTIVATED_PROTEIN_KINASE_SIGNALING_CASCADE	2/171	50/17872	0.0827563096054152	0.34533281257741	0.293339498839172	EZR/GSTP1	2
GOBP_POSITIVE_REGULATION_OF_REGULATED_SECRETORY_PATHWAY	GOBP_POSITIVE_REGULATION_OF_REGULATED_SECRETORY_PATHWAY	GOBP_POSITIVE_REGULATION_OF_REGULATED_SECRETORY_PATHWAY	2/171	50/17872	0.0827563096054152	0.34533281257741	0.293339498839172	VAMP8/ITGB2	2
GOBP_PROSTANOID_METABOLIC_PROCESS	GOBP_PROSTANOID_METABOLIC_PROCESS	GOBP_PROSTANOID_METABOLIC_PROCESS	2/171	50/17872	0.0827563096054152	0.34533281257741	0.293339498839172	FABP5/GSTP1	2
GOBP_T_CELL_APOPTOTIC_PROCESS	GOBP_T_CELL_APOPTOTIC_PROCESS	GOBP_T_CELL_APOPTOTIC_PROCESS	2/171	50/17872	0.0827563096054152	0.34533281257741	0.293339498839172	HIF1A/RPS6	2
GOBP_CELLULAR_MONOVALENT_INORGANIC_CATION_HOMEOSTASIS	GOBP_CELLULAR_MONOVALENT_INORGANIC_CATION_HOMEOSTASIS	GOBP_CELLULAR_MONOVALENT_INORGANIC_CATION_HOMEOSTASIS	3/171	107/17872	0.0832838313998338	0.346852662535778	0.294630520163705	GRN/ATP6V0E1/PPT1	3
GOBP_ACTIN_CYTOSKELETON_REORGANIZATION	GOBP_ACTIN_CYTOSKELETON_REORGANIZATION	GOBP_ACTIN_CYTOSKELETON_REORGANIZATION	3/171	108/17872	0.085089023752307	0.350453969658905	0.297689614429261	GMFG/ARHGDIB/EZR	3
GOBP_VIRAL_LIFE_CYCLE	GOBP_VIRAL_LIFE_CYCLE	GOBP_VIRAL_LIFE_CYCLE	6/171	318/17872	0.0854745378608637	0.350453969658905	0.297689614429261	VAMP8/APOE/ANPEP/HSPA8/LGALS1/FCN1	6
GOBP_GLIAL_CELL_MIGRATION	GOBP_GLIAL_CELL_MIGRATION	GOBP_GLIAL_CELL_MIGRATION	2/171	51/17872	0.085611327847125	0.350453969658905	0.297689614429261	TSPO/CD9	2
GOBP_MITOCHONDRIAL_ELECTRON_TRANSPORT_NADH_TO_UBIQUINONE	GOBP_MITOCHONDRIAL_ELECTRON_TRANSPORT_NADH_TO_UBIQUINONE	GOBP_MITOCHONDRIAL_ELECTRON_TRANSPORT_NADH_TO_UBIQUINONE	2/171	51/17872	0.085611327847125	0.350453969658905	0.297689614429261	NDUFB10/NDUFA4	2
GOBP_NEGATIVE_REGULATION_OF_I_KAPPAB_KINASE_NF_KAPPAB_SIGNALING	GOBP_NEGATIVE_REGULATION_OF_I_KAPPAB_KINASE_NF_KAPPAB_SIGNALING	GOBP_NEGATIVE_REGULATION_OF_I_KAPPAB_KINASE_NF_KAPPAB_SIGNALING	2/171	51/17872	0.085611327847125	0.350453969658905	0.297689614429261	PYCARD/GSTP1	2
GOBP_FATTY_ACID_METABOLIC_PROCESS	GOBP_FATTY_ACID_METABOLIC_PROCESS	GOBP_FATTY_ACID_METABOLIC_PROCESS	7/171	395/17872	0.0856893320818312	0.350453969658905	0.297689614429261	GPX1/APOC1/DBI/CD36/SLC27A4/FABP5/GSTP1	7
GOBP_RIBOSE_PHOSPHATE_METABOLIC_PROCESS	GOBP_RIBOSE_PHOSPHATE_METABOLIC_PROCESS	GOBP_RIBOSE_PHOSPHATE_METABOLIC_PROCESS	7/171	395/17872	0.0856893320818312	0.350453969658905	0.297689614429261	TMSB4X/HIF1A/ATP5MG/TKT/ALDOA/PPT1/TPI1	7
GOBP_GLYCEROLIPID_METABOLIC_PROCESS	GOBP_GLYCEROLIPID_METABOLIC_PROCESS	GOBP_GLYCEROLIPID_METABOLIC_PROCESS	7/171	396/17872	0.0865656257652621	0.350453969658905	0.297689614429261	GPX1/APOE/APOC1/DBI/GPAT3/FABP5/INPP5A	7
GOBP_PROTEIN_CONTAINING_COMPLEX_DISASSEMBLY	GOBP_PROTEIN_CONTAINING_COMPLEX_DISASSEMBLY	GOBP_PROTEIN_CONTAINING_COMPLEX_DISASSEMBLY	5/171	245/17872	0.0866511109946707	0.350453969658905	0.297689614429261	VAMP8/HSPA8/CFL1/MAP1LC3B/CAPG	5
GOBP_POSITIVE_REGULATION_OF_EPITHELIAL_CELL_MIGRATION	GOBP_POSITIVE_REGULATION_OF_EPITHELIAL_CELL_MIGRATION	GOBP_POSITIVE_REGULATION_OF_EPITHELIAL_CELL_MIGRATION	4/171	175/17872	0.087499982163619	0.350453969658905	0.297689614429261	TMSB4X/HIF1A/PFN1/GRN	4
GOBP_REGULATION_OF_LIPID_BIOSYNTHETIC_PROCESS	GOBP_REGULATION_OF_LIPID_BIOSYNTHETIC_PROCESS	GOBP_REGULATION_OF_LIPID_BIOSYNTHETIC_PROCESS	4/171	175/17872	0.087499982163619	0.350453969658905	0.297689614429261	TSPO/APOE/APOC1/FABP5	4
GOBP_ACTIN_NUCLEATION	GOBP_ACTIN_NUCLEATION	GOBP_ACTIN_NUCLEATION	2/171	52/17872	0.088495830268017	0.350453969658905	0.297689614429261	GMFG/ARPC2	2
GOBP_NEGATIVE_REGULATION_OF_COAGULATION	GOBP_NEGATIVE_REGULATION_OF_COAGULATION	GOBP_NEGATIVE_REGULATION_OF_COAGULATION	2/171	52/17872	0.088495830268017	0.350453969658905	0.297689614429261	APOE/CD9	2
GOBP_POSITIVE_REGULATION_OF_NEURON_APOPTOTIC_PROCESS	GOBP_POSITIVE_REGULATION_OF_NEURON_APOPTOTIC_PROCESS	GOBP_POSITIVE_REGULATION_OF_NEURON_APOPTOTIC_PROCESS	2/171	52/17872	0.088495830268017	0.350453969658905	0.297689614429261	TYROBP/GRN	2
GOBP_REGULATION_OF_CHOLESTEROL_EFFLUX	GOBP_REGULATION_OF_CHOLESTEROL_EFFLUX	GOBP_REGULATION_OF_CHOLESTEROL_EFFLUX	2/171	52/17872	0.088495830268017	0.350453969658905	0.297689614429261	APOE/EEPD1	2
GOBP_POSITIVE_REGULATION_OF_UBIQUITIN_DEPENDENT_PROTEIN_CATABOLIC_PROCESS	GOBP_POSITIVE_REGULATION_OF_UBIQUITIN_DEPENDENT_PROTEIN_CATABOLIC_PROCESS	GOBP_POSITIVE_REGULATION_OF_UBIQUITIN_DEPENDENT_PROTEIN_CATABOLIC_PROCESS	3/171	110/17872	0.0887492405564348	0.350453969658905	0.297689614429261	RACK1/GABARAP/ELOB	3
GOBP_BLOOD_VESSEL_ENDOTHELIAL_CELL_MIGRATION	GOBP_BLOOD_VESSEL_ENDOTHELIAL_CELL_MIGRATION	GOBP_BLOOD_VESSEL_ENDOTHELIAL_CELL_MIGRATION	4/171	176/17872	0.0889019623555516	0.350453969658905	0.297689614429261	TMSB4X/GPX1/HIF1A/APOE	4
GOBP_LONG_CHAIN_FATTY_ACID_METABOLIC_PROCESS	GOBP_LONG_CHAIN_FATTY_ACID_METABOLIC_PROCESS	GOBP_LONG_CHAIN_FATTY_ACID_METABOLIC_PROCESS	3/171	111/17872	0.0906039329516523	0.350453969658905	0.297689614429261	GPX1/SLC27A4/GSTP1	3
GOBP_NUCLEOSIDE_TRIPHOSPHATE_METABOLIC_PROCESS	GOBP_NUCLEOSIDE_TRIPHOSPHATE_METABOLIC_PROCESS	GOBP_NUCLEOSIDE_TRIPHOSPHATE_METABOLIC_PROCESS	3/171	111/17872	0.0906039329516523	0.350453969658905	0.297689614429261	TMSB4X/ATP5MG/ALDOA	3
GOBP_DEFENSE_RESPONSE_TO_FUNGUS	GOBP_DEFENSE_RESPONSE_TO_FUNGUS	GOBP_DEFENSE_RESPONSE_TO_FUNGUS	2/171	53/17872	0.091408999340023	0.350453969658905	0.297689614429261	S100A9/S100A8	2
GOBP_NEGATIVE_REGULATION_OF_INTERLEUKIN_1_PRODUCTION	GOBP_NEGATIVE_REGULATION_OF_INTERLEUKIN_1_PRODUCTION	GOBP_NEGATIVE_REGULATION_OF_INTERLEUKIN_1_PRODUCTION	2/171	53/17872	0.091408999340023	0.350453969658905	0.297689614429261	CARD16/GSTP1	2
GOBP_PORPHYRIN_CONTAINING_COMPOUND_METABOLIC_PROCESS	GOBP_PORPHYRIN_CONTAINING_COMPOUND_METABOLIC_PROCESS	GOBP_PORPHYRIN_CONTAINING_COMPOUND_METABOLIC_PROCESS	2/171	53/17872	0.091408999340023	0.350453969658905	0.297689614429261	TSPO/BLVRB	2
GOBP_ASTRAL_MICROTUBULE_ORGANIZATION	GOBP_ASTRAL_MICROTUBULE_ORGANIZATION	GOBP_ASTRAL_MICROTUBULE_ORGANIZATION	1/171	10/17872	0.0916862355345888	0.350453969658905	0.297689614429261	EZR	1
GOBP_DETECTION_OF_CELL_DENSITY	GOBP_DETECTION_OF_CELL_DENSITY	GOBP_DETECTION_OF_CELL_DENSITY	1/171	10/17872	0.0916862355345888	0.350453969658905	0.297689614429261	TSPO	1
GOBP_ESTABLISHMENT_OF_CENTROSOME_LOCALIZATION	GOBP_ESTABLISHMENT_OF_CENTROSOME_LOCALIZATION	GOBP_ESTABLISHMENT_OF_CENTROSOME_LOCALIZATION	1/171	10/17872	0.0916862355345888	0.350453969658905	0.297689614429261	EZR	1
GOBP_FRUCTOSE_1_6_BISPHOSPHATE_METABOLIC_PROCESS	GOBP_FRUCTOSE_1_6_BISPHOSPHATE_METABOLIC_PROCESS	GOBP_FRUCTOSE_1_6_BISPHOSPHATE_METABOLIC_PROCESS	1/171	10/17872	0.0916862355345888	0.350453969658905	0.297689614429261	ALDOA	1
GOBP_GLIAL_CELL_DERIVED_NEUROTROPHIC_FACTOR_RECEPTOR_SIGNALING_PATHWAY	GOBP_GLIAL_CELL_DERIVED_NEUROTROPHIC_FACTOR_RECEPTOR_SIGNALING_PATHWAY	GOBP_GLIAL_CELL_DERIVED_NEUROTROPHIC_FACTOR_RECEPTOR_SIGNALING_PATHWAY	1/171	10/17872	0.0916862355345888	0.350453969658905	0.297689614429261	SULF2	1
GOBP_HISTAMINE_PRODUCTION_INVOLVED_IN_INFLAMMATORY_RESPONSE	GOBP_HISTAMINE_PRODUCTION_INVOLVED_IN_INFLAMMATORY_RESPONSE	GOBP_HISTAMINE_PRODUCTION_INVOLVED_IN_INFLAMMATORY_RESPONSE	1/171	10/17872	0.0916862355345888	0.350453969658905	0.297689614429261	VAMP8	1
GOBP_LONG_CHAIN_FATTY_ACID_IMPORT_ACROSS_PLASMA_MEMBRANE	GOBP_LONG_CHAIN_FATTY_ACID_IMPORT_ACROSS_PLASMA_MEMBRANE	GOBP_LONG_CHAIN_FATTY_ACID_IMPORT_ACROSS_PLASMA_MEMBRANE	1/171	10/17872	0.0916862355345888	0.350453969658905	0.297689614429261	CD36	1
GOBP_NEGATIVE_REGULATION_OF_MESENCHYMAL_CELL_APOPTOTIC_PROCESS	GOBP_NEGATIVE_REGULATION_OF_MESENCHYMAL_CELL_APOPTOTIC_PROCESS	GOBP_NEGATIVE_REGULATION_OF_MESENCHYMAL_CELL_APOPTOTIC_PROCESS	1/171	10/17872	0.0916862355345888	0.350453969658905	0.297689614429261	HIF1A	1
GOBP_PIGMENT_GRANULE_MATURATION	GOBP_PIGMENT_GRANULE_MATURATION	GOBP_PIGMENT_GRANULE_MATURATION	1/171	10/17872	0.0916862355345888	0.350453969658905	0.297689614429261	CD63	1
GOBP_POSITIVE_REGULATION_OF_LIGASE_ACTIVITY	GOBP_POSITIVE_REGULATION_OF_LIGASE_ACTIVITY	GOBP_POSITIVE_REGULATION_OF_LIGASE_ACTIVITY	1/171	10/17872	0.0916862355345888	0.350453969658905	0.297689614429261	TMSB4X	1
GOBP_PROTEIN_DEPALMITOYLATION	GOBP_PROTEIN_DEPALMITOYLATION	GOBP_PROTEIN_DEPALMITOYLATION	1/171	10/17872	0.0916862355345888	0.350453969658905	0.297689614429261	PPT1	1
GOBP_PROTEIN_LOCALIZATION_TO_EARLY_ENDOSOME	GOBP_PROTEIN_LOCALIZATION_TO_EARLY_ENDOSOME	GOBP_PROTEIN_LOCALIZATION_TO_EARLY_ENDOSOME	1/171	10/17872	0.0916862355345888	0.350453969658905	0.297689614429261	EZR	1
GOBP_REGULATION_OF_CHEMOKINE_MEDIATED_SIGNALING_PATHWAY	GOBP_REGULATION_OF_CHEMOKINE_MEDIATED_SIGNALING_PATHWAY	GOBP_REGULATION_OF_CHEMOKINE_MEDIATED_SIGNALING_PATHWAY	1/171	10/17872	0.0916862355345888	0.350453969658905	0.297689614429261	HIF1A	1
GOBP_REGULATION_OF_CYCLIC_NUCLEOTIDE_PHOSPHODIESTERASE_ACTIVITY	GOBP_REGULATION_OF_CYCLIC_NUCLEOTIDE_PHOSPHODIESTERASE_ACTIVITY	GOBP_REGULATION_OF_CYCLIC_NUCLEOTIDE_PHOSPHODIESTERASE_ACTIVITY	1/171	10/17872	0.0916862355345888	0.350453969658905	0.297689614429261	RACK1	1
GOBP_REGULATION_OF_DEOXYRIBONUCLEASE_ACTIVITY	GOBP_REGULATION_OF_DEOXYRIBONUCLEASE_ACTIVITY	GOBP_REGULATION_OF_DEOXYRIBONUCLEASE_ACTIVITY	1/171	10/17872	0.0916862355345888	0.350453969658905	0.297689614429261	RPS3	1
GOBP_REGULATION_OF_GLOMERULAR_FILTRATION	GOBP_REGULATION_OF_GLOMERULAR_FILTRATION	GOBP_REGULATION_OF_GLOMERULAR_FILTRATION	1/171	10/17872	0.0916862355345888	0.350453969658905	0.297689614429261	CYBA	1
GOBP_REGULATION_OF_GOLGI_TO_PLASMA_MEMBRANE_PROTEIN_TRANSPORT	GOBP_REGULATION_OF_GOLGI_TO_PLASMA_MEMBRANE_PROTEIN_TRANSPORT	GOBP_REGULATION_OF_GOLGI_TO_PLASMA_MEMBRANE_PROTEIN_TRANSPORT	1/171	10/17872	0.0916862355345888	0.350453969658905	0.297689614429261	RACK1	1
GOBP_REGULATION_OF_OPSONIZATION	GOBP_REGULATION_OF_OPSONIZATION	GOBP_REGULATION_OF_OPSONIZATION	1/171	10/17872	0.0916862355345888	0.350453969658905	0.297689614429261	FCN1	1
GOBP_REGULATION_OF_PHOSPHATIDYLCHOLINE_METABOLIC_PROCESS	GOBP_REGULATION_OF_PHOSPHATIDYLCHOLINE_METABOLIC_PROCESS	GOBP_REGULATION_OF_PHOSPHATIDYLCHOLINE_METABOLIC_PROCESS	1/171	10/17872	0.0916862355345888	0.350453969658905	0.297689614429261	APOC1	1
GOBP_REGULATION_OF_REMOVAL_OF_SUPEROXIDE_RADICALS	GOBP_REGULATION_OF_REMOVAL_OF_SUPEROXIDE_RADICALS	GOBP_REGULATION_OF_REMOVAL_OF_SUPEROXIDE_RADICALS	1/171	10/17872	0.0916862355345888	0.350453969658905	0.297689614429261	CD36	1
GOBP_RETROGRADE_TRANS_SYNAPTIC_SIGNALING	GOBP_RETROGRADE_TRANS_SYNAPTIC_SIGNALING	GOBP_RETROGRADE_TRANS_SYNAPTIC_SIGNALING	1/171	10/17872	0.0916862355345888	0.350453969658905	0.297689614429261	FABP5	1
GOBP_RRNA_PSEUDOURIDINE_SYNTHESIS	GOBP_RRNA_PSEUDOURIDINE_SYNTHESIS	GOBP_RRNA_PSEUDOURIDINE_SYNTHESIS	1/171	10/17872	0.0916862355345888	0.350453969658905	0.297689614429261	NOP10	1
GOBP_VERY_LOW_DENSITY_LIPOPROTEIN_PARTICLE_ASSEMBLY	GOBP_VERY_LOW_DENSITY_LIPOPROTEIN_PARTICLE_ASSEMBLY	GOBP_VERY_LOW_DENSITY_LIPOPROTEIN_PARTICLE_ASSEMBLY	1/171	10/17872	0.0916862355345888	0.350453969658905	0.297689614429261	APOC1	1
GOBP_REGULATION_OF_RESPONSE_TO_CYTOKINE_STIMULUS	GOBP_REGULATION_OF_RESPONSE_TO_CYTOKINE_STIMULUS	GOBP_REGULATION_OF_RESPONSE_TO_CYTOKINE_STIMULUS	4/171	178/17872	0.0917384214361351	0.350453969658905	0.297689614429261	HIF1A/PYCARD/CARD16/GSTP1	4
GOBP_AMEBOIDAL_TYPE_CELL_MIGRATION	GOBP_AMEBOIDAL_TYPE_CELL_MIGRATION	GOBP_AMEBOIDAL_TYPE_CELL_MIGRATION	8/171	482/17872	0.0922124792316008	0.351632506082442	0.29869071039018	TMSB4X/GPX1/HIF1A/PFN1/GRN/APOE/ARHGDIB/LAMTOR2	8
GOBP_RIBONUCLEOSIDE_DIPHOSPHATE_METABOLIC_PROCESS	GOBP_RIBONUCLEOSIDE_DIPHOSPHATE_METABOLIC_PROCESS	GOBP_RIBONUCLEOSIDE_DIPHOSPHATE_METABOLIC_PROCESS	3/171	112/17872	0.0924747911030321	0.352000817747026	0.299003569044703	HIF1A/ALDOA/TPI1	3
GOBP_NEGATIVE_REGULATION_OF_CATABOLIC_PROCESS	GOBP_NEGATIVE_REGULATION_OF_CATABOLIC_PROCESS	GOBP_NEGATIVE_REGULATION_OF_CATABOLIC_PROCESS	6/171	326/17872	0.093532511661657	0.355351865561647	0.301850083047212	TSPO/USP36/RPL11/APOC1/CST3/YBX1	6
GOBP_CELLULAR_DEFENSE_RESPONSE	GOBP_CELLULAR_DEFENSE_RESPONSE	GOBP_CELLULAR_DEFENSE_RESPONSE	2/171	54/17872	0.0943500303143158	0.355351865561647	0.301850083047212	TYROBP/MNDA	2
GOBP_POSITIVE_REGULATION_OF_RECEPTOR_MEDIATED_ENDOCYTOSIS	GOBP_POSITIVE_REGULATION_OF_RECEPTOR_MEDIATED_ENDOCYTOSIS	GOBP_POSITIVE_REGULATION_OF_RECEPTOR_MEDIATED_ENDOCYTOSIS	2/171	54/17872	0.0943500303143158	0.355351865561647	0.301850083047212	CD63/PPT1	2
GOBP_NEGATIVE_REGULATION_OF_RESPONSE_TO_BIOTIC_STIMULUS	GOBP_NEGATIVE_REGULATION_OF_RESPONSE_TO_BIOTIC_STIMULUS	GOBP_NEGATIVE_REGULATION_OF_RESPONSE_TO_BIOTIC_STIMULUS	3/171	113/17872	0.0943616457811117	0.355351865561647	0.301850083047212	GRN/CARD16/RPS19	3
GOBP_PATTERN_RECOGNITION_RECEPTOR_SIGNALING_PATHWAY	GOBP_PATTERN_RECOGNITION_RECEPTOR_SIGNALING_PATHWAY	GOBP_PATTERN_RECOGNITION_RECEPTOR_SIGNALING_PATHWAY	4/171	180/17872	0.0946178322831731	0.355351865561647	0.301850083047212	CYBA/CD14/FCN1/CD36	4
GOBP_CYTOKINE_MEDIATED_SIGNALING_PATHWAY	GOBP_CYTOKINE_MEDIATED_SIGNALING_PATHWAY	GOBP_CYTOKINE_MEDIATED_SIGNALING_PATHWAY	8/171	485/17872	0.0947114427102163	0.355351865561647	0.301850083047212	TMSB4X/HIF1A/PYCARD/TXNDC17/FCER1G/CARD16/GSTP1/OXSR1	8
GOBP_REGULATION_OF_RECEPTOR_MEDIATED_ENDOCYTOSIS	GOBP_REGULATION_OF_RECEPTOR_MEDIATED_ENDOCYTOSIS	GOBP_REGULATION_OF_RECEPTOR_MEDIATED_ENDOCYTOSIS	3/171	114/17872	0.0962643265954367	0.355351865561647	0.301850083047212	CD63/APOC1/PPT1	3
GOBP_CELL_GROWTH	GOBP_CELL_GROWTH	GOBP_CELL_GROWTH	8/171	487/17872	0.0963989101349964	0.355351865561647	0.301850083047212	CYBA/RACK1/APOE/S100A9/LAMTOR2/HSP90AA1/S100A8/PPT1	8
GOBP_HYDROGEN_PEROXIDE_METABOLIC_PROCESS	GOBP_HYDROGEN_PEROXIDE_METABOLIC_PROCESS	GOBP_HYDROGEN_PEROXIDE_METABOLIC_PROCESS	2/171	55/17872	0.0973181310540022	0.355351865561647	0.301850083047212	CYBA/GPX1	2
GOBP_MAST_CELL_ACTIVATION_INVOLVED_IN_IMMUNE_RESPONSE	GOBP_MAST_CELL_ACTIVATION_INVOLVED_IN_IMMUNE_RESPONSE	GOBP_MAST_CELL_ACTIVATION_INVOLVED_IN_IMMUNE_RESPONSE	2/171	55/17872	0.0973181310540022	0.355351865561647	0.301850083047212	VAMP8/STXBP2	2
GOBP_GLIAL_CELL_DEVELOPMENT	GOBP_GLIAL_CELL_DEVELOPMENT	GOBP_GLIAL_CELL_DEVELOPMENT	3/171	115/17872	0.0981826620587958	0.355351865561647	0.301850083047212	GRN/S100A9/S100A8	3
GOBP_UNSATURATED_FATTY_ACID_METABOLIC_PROCESS	GOBP_UNSATURATED_FATTY_ACID_METABOLIC_PROCESS	GOBP_UNSATURATED_FATTY_ACID_METABOLIC_PROCESS	3/171	115/17872	0.0981826620587958	0.355351865561647	0.301850083047212	GPX1/FABP5/GSTP1	3
GOBP_REGULATION_OF_PEPTIDE_TRANSPORT	GOBP_REGULATION_OF_PEPTIDE_TRANSPORT	GOBP_REGULATION_OF_PEPTIDE_TRANSPORT	4/171	183/17872	0.0990164529275024	0.355351865561647	0.301850083047212	HIF1A/S100A8/SELENOT/SERP1	4
GOBP_POSITIVE_REGULATION_OF_GROWTH	GOBP_POSITIVE_REGULATION_OF_GROWTH	GOBP_POSITIVE_REGULATION_OF_GROWTH	5/171	256/17872	0.0997423620523138	0.355351865561647	0.301850083047212	CYBA/S100A9/S100A8/EZR/SERP1	5
GOBP_CELLULAR_RESPONSE_TO_TOPOLOGICALLY_INCORRECT_PROTEIN	GOBP_CELLULAR_RESPONSE_TO_TOPOLOGICALLY_INCORRECT_PROTEIN	GOBP_CELLULAR_RESPONSE_TO_TOPOLOGICALLY_INCORRECT_PROTEIN	3/171	116/17872	0.100116479650102	0.355351865561647	0.301850083047212	RACK1/HSPA8/SERP1	3
GOBP_REGULATION_OF_MONONUCLEAR_CELL_MIGRATION	GOBP_REGULATION_OF_MONONUCLEAR_CELL_MIGRATION	GOBP_REGULATION_OF_MONONUCLEAR_CELL_MIGRATION	3/171	116/17872	0.100116479650102	0.355351865561647	0.301850083047212	AIF1/PYCARD/OXSR1	3
GOBP_T_CELL_ACTIVATION_INVOLVED_IN_IMMUNE_RESPONSE	GOBP_T_CELL_ACTIVATION_INVOLVED_IN_IMMUNE_RESPONSE	GOBP_T_CELL_ACTIVATION_INVOLVED_IN_IMMUNE_RESPONSE	3/171	116/17872	0.100116479650102	0.355351865561647	0.301850083047212	RPS6/FCER1G/MALT1	3
GOBP_RECEPTOR_CLUSTERING	GOBP_RECEPTOR_CLUSTERING	GOBP_RECEPTOR_CLUSTERING	2/171	56/17872	0.100312521868818	0.355351865561647	0.301850083047212	APOE/ITGB2	2
GOBP_RECEPTOR_LOCALIZATION_TO_SYNAPSE	GOBP_RECEPTOR_LOCALIZATION_TO_SYNAPSE	GOBP_RECEPTOR_LOCALIZATION_TO_SYNAPSE	2/171	56/17872	0.100312521868818	0.355351865561647	0.301850083047212	TYROBP/STX3	2
GOBP_REGULATION_OF_BIOLOGICAL_PROCESS_INVOLVED_IN_SYMBIOTIC_INTERACTION	GOBP_REGULATION_OF_BIOLOGICAL_PROCESS_INVOLVED_IN_SYMBIOTIC_INTERACTION	GOBP_REGULATION_OF_BIOLOGICAL_PROCESS_INVOLVED_IN_SYMBIOTIC_INTERACTION	2/171	56/17872	0.100312521868818	0.355351865561647	0.301850083047212	LGALS1/FCN1	2
GOBP_RELEASE_OF_CYTOCHROME_C_FROM_MITOCHONDRIA	GOBP_RELEASE_OF_CYTOCHROME_C_FROM_MITOCHONDRIA	GOBP_RELEASE_OF_CYTOCHROME_C_FROM_MITOCHONDRIA	2/171	56/17872	0.100312521868818	0.355351865561647	0.301850083047212	GPX1/PYCARD	2
GOBP_RESPONSE_TO_GAMMA_RADIATION	GOBP_RESPONSE_TO_GAMMA_RADIATION	GOBP_RESPONSE_TO_GAMMA_RADIATION	2/171	56/17872	0.100312521868818	0.355351865561647	0.301850083047212	CYBA/GPX1	2
GOBP_ALDITOL_PHOSPHATE_METABOLIC_PROCESS	GOBP_ALDITOL_PHOSPHATE_METABOLIC_PROCESS	GOBP_ALDITOL_PHOSPHATE_METABOLIC_PROCESS	1/171	11/17872	0.100381882927019	0.355351865561647	0.301850083047212	GPAT3	1
GOBP_ARGININE_CATABOLIC_PROCESS	GOBP_ARGININE_CATABOLIC_PROCESS	GOBP_ARGININE_CATABOLIC_PROCESS	1/171	11/17872	0.100381882927019	0.355351865561647	0.301850083047212	DDAH2	1
GOBP_CHOLESTEROL_CATABOLIC_PROCESS	GOBP_CHOLESTEROL_CATABOLIC_PROCESS	GOBP_CHOLESTEROL_CATABOLIC_PROCESS	1/171	11/17872	0.100381882927019	0.355351865561647	0.301850083047212	APOE	1
GOBP_FRUCTOSE_6_PHOSPHATE_METABOLIC_PROCESS	GOBP_FRUCTOSE_6_PHOSPHATE_METABOLIC_PROCESS	GOBP_FRUCTOSE_6_PHOSPHATE_METABOLIC_PROCESS	1/171	11/17872	0.100381882927019	0.355351865561647	0.301850083047212	TALDO1	1
GOBP_GASTRO_INTESTINAL_SYSTEM_SMOOTH_MUSCLE_CONTRACTION	GOBP_GASTRO_INTESTINAL_SYSTEM_SMOOTH_MUSCLE_CONTRACTION	GOBP_GASTRO_INTESTINAL_SYSTEM_SMOOTH_MUSCLE_CONTRACTION	1/171	11/17872	0.100381882927019	0.355351865561647	0.301850083047212	SULF2	1
GOBP_GLOMERULAR_BASEMENT_MEMBRANE_DEVELOPMENT	GOBP_GLOMERULAR_BASEMENT_MEMBRANE_DEVELOPMENT	GOBP_GLOMERULAR_BASEMENT_MEMBRANE_DEVELOPMENT	1/171	11/17872	0.100381882927019	0.355351865561647	0.301850083047212	SULF2	1
GOBP_LIPOXYGENASE_PATHWAY	GOBP_LIPOXYGENASE_PATHWAY	GOBP_LIPOXYGENASE_PATHWAY	1/171	11/17872	0.100381882927019	0.355351865561647	0.301850083047212	GPX1	1
GOBP_MACROPINOCYTOSIS	GOBP_MACROPINOCYTOSIS	GOBP_MACROPINOCYTOSIS	1/171	11/17872	0.100381882927019	0.355351865561647	0.301850083047212	PYCARD	1
GOBP_N_ACETYLNEURAMINATE_METABOLIC_PROCESS	GOBP_N_ACETYLNEURAMINATE_METABOLIC_PROCESS	GOBP_N_ACETYLNEURAMINATE_METABOLIC_PROCESS	1/171	11/17872	0.100381882927019	0.355351865561647	0.301850083047212	NPL	1
GOBP_POSITIVE_REGULATION_BY_SYMBIONT_OF_ENTRY_INTO_HOST	GOBP_POSITIVE_REGULATION_BY_SYMBIONT_OF_ENTRY_INTO_HOST	GOBP_POSITIVE_REGULATION_BY_SYMBIONT_OF_ENTRY_INTO_HOST	1/171	11/17872	0.100381882927019	0.355351865561647	0.301850083047212	LGALS1	1
GOBP_PROTEIN_LOCALIZATION_TO_CELL_CORTEX	GOBP_PROTEIN_LOCALIZATION_TO_CELL_CORTEX	GOBP_PROTEIN_LOCALIZATION_TO_CELL_CORTEX	1/171	11/17872	0.100381882927019	0.355351865561647	0.301850083047212	EZR	1
GOBP_REGULATION_OF_DENDRITIC_SPINE_MAINTENANCE	GOBP_REGULATION_OF_DENDRITIC_SPINE_MAINTENANCE	GOBP_REGULATION_OF_DENDRITIC_SPINE_MAINTENANCE	1/171	11/17872	0.100381882927019	0.355351865561647	0.301850083047212	APOE	1
GOBP_REGULATION_OF_HEXOKINASE_ACTIVITY	GOBP_REGULATION_OF_HEXOKINASE_ACTIVITY	GOBP_REGULATION_OF_HEXOKINASE_ACTIVITY	1/171	11/17872	0.100381882927019	0.355351865561647	0.301850083047212	RANBP2	1
GOBP_REGULATION_OF_NAD_P_H_OXIDASE_ACTIVITY	GOBP_REGULATION_OF_NAD_P_H_OXIDASE_ACTIVITY	GOBP_REGULATION_OF_NAD_P_H_OXIDASE_ACTIVITY	1/171	11/17872	0.100381882927019	0.355351865561647	0.301850083047212	CYBA	1
GOBP_REGULATION_OF_OSTEOCLAST_DEVELOPMENT	GOBP_REGULATION_OF_OSTEOCLAST_DEVELOPMENT	GOBP_REGULATION_OF_OSTEOCLAST_DEVELOPMENT	1/171	11/17872	0.100381882927019	0.355351865561647	0.301850083047212	TYROBP	1
GOBP_REGULATION_OF_PROTEIN_COMPLEX_STABILITY	GOBP_REGULATION_OF_PROTEIN_COMPLEX_STABILITY	GOBP_REGULATION_OF_PROTEIN_COMPLEX_STABILITY	1/171	11/17872	0.100381882927019	0.355351865561647	0.301850083047212	HSPA8	1
GOBP_REGULATION_OF_PROTEIN_LIPIDATION	GOBP_REGULATION_OF_PROTEIN_LIPIDATION	GOBP_REGULATION_OF_PROTEIN_LIPIDATION	1/171	11/17872	0.100381882927019	0.355351865561647	0.301850083047212	DBI	1
GOBP_REGULATION_OF_RECEPTOR_CATABOLIC_PROCESS	GOBP_REGULATION_OF_RECEPTOR_CATABOLIC_PROCESS	GOBP_REGULATION_OF_RECEPTOR_CATABOLIC_PROCESS	1/171	11/17872	0.100381882927019	0.355351865561647	0.301850083047212	APOE	1
GOBP_REGULATION_OF_THYMOCYTE_APOPTOTIC_PROCESS	GOBP_REGULATION_OF_THYMOCYTE_APOPTOTIC_PROCESS	GOBP_REGULATION_OF_THYMOCYTE_APOPTOTIC_PROCESS	1/171	11/17872	0.100381882927019	0.355351865561647	0.301850083047212	HIF1A	1
GOBP_REGULATION_OF_TRANSCRIPTION_FROM_RNA_POLYMERASE_II_PROMOTER_IN_RESPONSE_TO_OXIDATIVE_STRESS	GOBP_REGULATION_OF_TRANSCRIPTION_FROM_RNA_POLYMERASE_II_PROMOTER_IN_RESPONSE_TO_OXIDATIVE_STRESS	GOBP_REGULATION_OF_TRANSCRIPTION_FROM_RNA_POLYMERASE_II_PROMOTER_IN_RESPONSE_TO_OXIDATIVE_STRESS	1/171	11/17872	0.100381882927019	0.355351865561647	0.301850083047212	HIF1A	1
GOBP_POSITIVE_REGULATION_OF_CELLULAR_COMPONENT_BIOGENESIS	GOBP_POSITIVE_REGULATION_OF_CELLULAR_COMPONENT_BIOGENESIS	GOBP_POSITIVE_REGULATION_OF_CELLULAR_COMPONENT_BIOGENESIS	8/171	494/17872	0.102439920026043	0.361528653361248	0.307096893577748	PFN1/RPS3/RACK1/PYCARD/HSP90AA1/CD36/ARPC2/CAPG	8
GOBP_EMBRYO_IMPLANTATION	GOBP_EMBRYO_IMPLANTATION	GOBP_EMBRYO_IMPLANTATION	2/171	57/17872	0.103332435351803	0.361528653361248	0.307096893577748	RPL29/ARHGDIB	2
GOBP_INTERFERON_BETA_PRODUCTION	GOBP_INTERFERON_BETA_PRODUCTION	GOBP_INTERFERON_BETA_PRODUCTION	2/171	57/17872	0.103332435351803	0.361528653361248	0.307096893577748	PYCARD/HSP90AA1	2
GOBP_RUFFLE_ORGANIZATION	GOBP_RUFFLE_ORGANIZATION	GOBP_RUFFLE_ORGANIZATION	2/171	57/17872	0.103332435351803	0.361528653361248	0.307096893577748	PFN1/AIF1	2
GOBP_VESICLE_DOCKING	GOBP_VESICLE_DOCKING	GOBP_VESICLE_DOCKING	2/171	57/17872	0.103332435351803	0.361528653361248	0.307096893577748	STXBP2/STX3	2
GOBP_LYMPHOCYTE_MIGRATION	GOBP_LYMPHOCYTE_MIGRATION	GOBP_LYMPHOCYTE_MIGRATION	3/171	118/17872	0.104029866330809	0.361528653361248	0.307096893577748	AIF1/PYCARD/OXSR1	3
GOBP_VIRAL_PROCESS	GOBP_VIRAL_PROCESS	GOBP_VIRAL_PROCESS	7/171	415/17872	0.104183507071317	0.361528653361248	0.307096893577748	VAMP8/APOE/ANPEP/HSPA8/LGALS1/FCN1/CFL1	7
GOBP_PROTEIN_DEPOLYMERIZATION	GOBP_PROTEIN_DEPOLYMERIZATION	GOBP_PROTEIN_DEPOLYMERIZATION	3/171	119/17872	0.106009085756055	0.361528653361248	0.307096893577748	HSPA8/CFL1/CAPG	3
GOBP_POSITIVE_REGULATION_OF_TYPE_I_INTERFERON_PRODUCTION	GOBP_POSITIVE_REGULATION_OF_TYPE_I_INTERFERON_PRODUCTION	GOBP_POSITIVE_REGULATION_OF_TYPE_I_INTERFERON_PRODUCTION	2/171	58/17872	0.106377116217931	0.361528653361248	0.307096893577748	CD14/HSP90AA1	2
GOBP_POSITIVE_REGULATION_OF_WOUND_HEALING	GOBP_POSITIVE_REGULATION_OF_WOUND_HEALING	GOBP_POSITIVE_REGULATION_OF_WOUND_HEALING	2/171	58/17872	0.106377116217931	0.361528653361248	0.307096893577748	ACTG1/CD36	2
GOBP_VACUOLE_ORGANIZATION	GOBP_VACUOLE_ORGANIZATION	GOBP_VACUOLE_ORGANIZATION	4/171	188/17872	0.106555394527851	0.361528653361248	0.307096893577748	GRN/GABARAP/PPT1/MAP1LC3B	4
GOBP_PROTEIN_LOCALIZATION_TO_CELL_PERIPHERY	GOBP_PROTEIN_LOCALIZATION_TO_CELL_PERIPHERY	GOBP_PROTEIN_LOCALIZATION_TO_CELL_PERIPHERY	6/171	339/17872	0.107469779452156	0.361528653361248	0.307096893577748	VAMP8/ACTB/RACK1/TMEM59/EZR/STX3	6
GOBP_REGULATION_OF_LIPID_METABOLIC_PROCESS	GOBP_REGULATION_OF_LIPID_METABOLIC_PROCESS	GOBP_REGULATION_OF_LIPID_METABOLIC_PROCESS	6/171	339/17872	0.107469779452156	0.361528653361248	0.307096893577748	NPC2/TSPO/APOE/APOC1/FABP5/EDF1	6
GOBP_TRANSLATIONAL_INITIATION	GOBP_TRANSLATIONAL_INITIATION	GOBP_TRANSLATIONAL_INITIATION	3/171	120/17872	0.10800308809757	0.361528653361248	0.307096893577748	RPS3/RPS5/EIF1	3
GOBP_MONOSACCHARIDE_METABOLIC_PROCESS	GOBP_MONOSACCHARIDE_METABOLIC_PROCESS	GOBP_MONOSACCHARIDE_METABOLIC_PROCESS	5/171	263/17872	0.108563238611016	0.361528653361248	0.307096893577748	RANBP2/ALDOA/FABP5/SERP1/TPI1	5
GOBP_VASCULAR_PROCESS_IN_CIRCULATORY_SYSTEM	GOBP_VASCULAR_PROCESS_IN_CIRCULATORY_SYSTEM	GOBP_VASCULAR_PROCESS_IN_CIRCULATORY_SYSTEM	5/171	263/17872	0.108563238611016	0.361528653361248	0.307096893577748	GPX1/APOE/CD36/SLC27A4/FABP5	5
GOBP_NEGATIVE_REGULATION_OF_CELLULAR_MACROMOLECULE_BIOSYNTHETIC_PROCESS	GOBP_NEGATIVE_REGULATION_OF_CELLULAR_MACROMOLECULE_BIOSYNTHETIC_PROCESS	GOBP_NEGATIVE_REGULATION_OF_CELLULAR_MACROMOLECULE_BIOSYNTHETIC_PROCESS	6/171	340/17872	0.108584375127779	0.361528653361248	0.307096893577748	RPS3/RACK1/DBI/TMEM59/S100A11/YBX1	6
GOBP_ADHERENS_JUNCTION_ASSEMBLY	GOBP_ADHERENS_JUNCTION_ASSEMBLY	GOBP_ADHERENS_JUNCTION_ASSEMBLY	1/171	12/17872	0.108994765633445	0.361528653361248	0.307096893577748	ACTB	1
GOBP_CELLULAR_RESPONSE_TO_INCREASED_OXYGEN_LEVELS	GOBP_CELLULAR_RESPONSE_TO_INCREASED_OXYGEN_LEVELS	GOBP_CELLULAR_RESPONSE_TO_INCREASED_OXYGEN_LEVELS	1/171	12/17872	0.108994765633445	0.361528653361248	0.307096893577748	ATP6V1G1	1
GOBP_CELLULAR_RESPONSE_TO_OXIDISED_LOW_DENSITY_LIPOPROTEIN_PARTICLE_STIMULUS	GOBP_CELLULAR_RESPONSE_TO_OXIDISED_LOW_DENSITY_LIPOPROTEIN_PARTICLE_STIMULUS	GOBP_CELLULAR_RESPONSE_TO_OXIDISED_LOW_DENSITY_LIPOPROTEIN_PARTICLE_STIMULUS	1/171	12/17872	0.108994765633445	0.361528653361248	0.307096893577748	CD36	1
GOBP_COMPLEMENT_ACTIVATION_LECTIN_PATHWAY	GOBP_COMPLEMENT_ACTIVATION_LECTIN_PATHWAY	GOBP_COMPLEMENT_ACTIVATION_LECTIN_PATHWAY	1/171	12/17872	0.108994765633445	0.361528653361248	0.307096893577748	FCN1	1
GOBP_HISTAMINE_SECRETION	GOBP_HISTAMINE_SECRETION	GOBP_HISTAMINE_SECRETION	1/171	12/17872	0.108994765633445	0.361528653361248	0.307096893577748	VAMP8	1
GOBP_NEGATIVE_REGULATION_OF_ACUTE_INFLAMMATORY_RESPONSE	GOBP_NEGATIVE_REGULATION_OF_ACUTE_INFLAMMATORY_RESPONSE	GOBP_NEGATIVE_REGULATION_OF_ACUTE_INFLAMMATORY_RESPONSE	1/171	12/17872	0.108994765633445	0.361528653361248	0.307096893577748	GSTP1	1
GOBP_NEGATIVE_REGULATION_OF_NUCLEAR_TRANSCRIBED_MRNA_CATABOLIC_PROCESS_DEADENYLATION_DEPENDENT_DECAY	GOBP_NEGATIVE_REGULATION_OF_NUCLEAR_TRANSCRIBED_MRNA_CATABOLIC_PROCESS_DEADENYLATION_DEPENDENT_DECAY	GOBP_NEGATIVE_REGULATION_OF_NUCLEAR_TRANSCRIBED_MRNA_CATABOLIC_PROCESS_DEADENYLATION_DEPENDENT_DECAY	1/171	12/17872	0.108994765633445	0.361528653361248	0.307096893577748	YBX1	1
GOBP_NEGATIVE_REGULATION_OF_TRANSFORMING_GROWTH_FACTOR_BETA_PRODUCTION	GOBP_NEGATIVE_REGULATION_OF_TRANSFORMING_GROWTH_FACTOR_BETA_PRODUCTION	GOBP_NEGATIVE_REGULATION_OF_TRANSFORMING_GROWTH_FACTOR_BETA_PRODUCTION	1/171	12/17872	0.108994765633445	0.361528653361248	0.307096893577748	TYROBP	1
GOBP_NEGATIVE_REGULATION_OF_TRIGLYCERIDE_METABOLIC_PROCESS	GOBP_NEGATIVE_REGULATION_OF_TRIGLYCERIDE_METABOLIC_PROCESS	GOBP_NEGATIVE_REGULATION_OF_TRIGLYCERIDE_METABOLIC_PROCESS	1/171	12/17872	0.108994765633445	0.361528653361248	0.307096893577748	APOE	1
GOBP_PIGMENT_ACCUMULATION	GOBP_PIGMENT_ACCUMULATION	GOBP_PIGMENT_ACCUMULATION	1/171	12/17872	0.108994765633445	0.361528653361248	0.307096893577748	CD63	1
GOBP_POSITIVE_REGULATION_OF_MACROPHAGE_CYTOKINE_PRODUCTION	GOBP_POSITIVE_REGULATION_OF_MACROPHAGE_CYTOKINE_PRODUCTION	GOBP_POSITIVE_REGULATION_OF_MACROPHAGE_CYTOKINE_PRODUCTION	1/171	12/17872	0.108994765633445	0.361528653361248	0.307096893577748	CD36	1
GOBP_POSITIVE_REGULATION_OF_NLRP3_INFLAMMASOME_COMPLEX_ASSEMBLY	GOBP_POSITIVE_REGULATION_OF_NLRP3_INFLAMMASOME_COMPLEX_ASSEMBLY	GOBP_POSITIVE_REGULATION_OF_NLRP3_INFLAMMASOME_COMPLEX_ASSEMBLY	1/171	12/17872	0.108994765633445	0.361528653361248	0.307096893577748	CD36	1
GOBP_POSITIVE_REGULATION_OF_PODOSOME_ASSEMBLY	GOBP_POSITIVE_REGULATION_OF_PODOSOME_ASSEMBLY	GOBP_POSITIVE_REGULATION_OF_PODOSOME_ASSEMBLY	1/171	12/17872	0.108994765633445	0.361528653361248	0.307096893577748	CAPG	1
GOBP_REGULATION_OF_ASPARTIC_TYPE_PEPTIDASE_ACTIVITY	GOBP_REGULATION_OF_ASPARTIC_TYPE_PEPTIDASE_ACTIVITY	GOBP_REGULATION_OF_ASPARTIC_TYPE_PEPTIDASE_ACTIVITY	1/171	12/17872	0.108994765633445	0.361528653361248	0.307096893577748	GRN	1
GOBP_REGULATION_OF_BLOOD_VESSEL_REMODELING	GOBP_REGULATION_OF_BLOOD_VESSEL_REMODELING	GOBP_REGULATION_OF_BLOOD_VESSEL_REMODELING	1/171	12/17872	0.108994765633445	0.361528653361248	0.307096893577748	CST3	1
GOBP_REGULATION_OF_LIGASE_ACTIVITY	GOBP_REGULATION_OF_LIGASE_ACTIVITY	GOBP_REGULATION_OF_LIGASE_ACTIVITY	1/171	12/17872	0.108994765633445	0.361528653361248	0.307096893577748	TMSB4X	1
GOBP_REGULATION_OF_PINOCYTOSIS	GOBP_REGULATION_OF_PINOCYTOSIS	GOBP_REGULATION_OF_PINOCYTOSIS	1/171	12/17872	0.108994765633445	0.361528653361248	0.307096893577748	PPT1	1
GOBP_REGULATION_OF_PROTEIN_LOCALIZATION_TO_ENDOSOME	GOBP_REGULATION_OF_PROTEIN_LOCALIZATION_TO_ENDOSOME	GOBP_REGULATION_OF_PROTEIN_LOCALIZATION_TO_ENDOSOME	1/171	12/17872	0.108994765633445	0.361528653361248	0.307096893577748	EZR	1
GOBP_REGULATION_OF_TOLL_LIKE_RECEPTOR_2_SIGNALING_PATHWAY	GOBP_REGULATION_OF_TOLL_LIKE_RECEPTOR_2_SIGNALING_PATHWAY	GOBP_REGULATION_OF_TOLL_LIKE_RECEPTOR_2_SIGNALING_PATHWAY	1/171	12/17872	0.108994765633445	0.361528653361248	0.307096893577748	CYBA	1
GOBP_REGULATION_OF_TRANSFORMING_GROWTH_FACTOR_BETA1_PRODUCTION	GOBP_REGULATION_OF_TRANSFORMING_GROWTH_FACTOR_BETA1_PRODUCTION	GOBP_REGULATION_OF_TRANSFORMING_GROWTH_FACTOR_BETA1_PRODUCTION	1/171	12/17872	0.108994765633445	0.361528653361248	0.307096893577748	TYROBP	1
GOBP_RESPONSE_TO_SELENIUM_ION	GOBP_RESPONSE_TO_SELENIUM_ION	GOBP_RESPONSE_TO_SELENIUM_ION	1/171	12/17872	0.108994765633445	0.361528653361248	0.307096893577748	GPX1	1
GOBP_TETRAPYRROLE_CATABOLIC_PROCESS	GOBP_TETRAPYRROLE_CATABOLIC_PROCESS	GOBP_TETRAPYRROLE_CATABOLIC_PROCESS	1/171	12/17872	0.108994765633445	0.361528653361248	0.307096893577748	BLVRB	1
GOBP_TRIGLYCERIDE_RICH_LIPOPROTEIN_PARTICLE_REMODELING	GOBP_TRIGLYCERIDE_RICH_LIPOPROTEIN_PARTICLE_REMODELING	GOBP_TRIGLYCERIDE_RICH_LIPOPROTEIN_PARTICLE_REMODELING	1/171	12/17872	0.108994765633445	0.361528653361248	0.307096893577748	APOE	1
GOBP_ACTIN_FILAMENT_DEPOLYMERIZATION	GOBP_ACTIN_FILAMENT_DEPOLYMERIZATION	GOBP_ACTIN_FILAMENT_DEPOLYMERIZATION	2/171	59/17872	0.109445821144672	0.361528653361248	0.307096893577748	CFL1/CAPG	2
GOBP_INSULIN_SECRETION_INVOLVED_IN_CELLULAR_RESPONSE_TO_GLUCOSE_STIMULUS	GOBP_INSULIN_SECRETION_INVOLVED_IN_CELLULAR_RESPONSE_TO_GLUCOSE_STIMULUS	GOBP_INSULIN_SECRETION_INVOLVED_IN_CELLULAR_RESPONSE_TO_GLUCOSE_STIMULUS	2/171	59/17872	0.109445821144672	0.361528653361248	0.307096893577748	HIF1A/SELENOT	2
GOBP_NEURON_PROJECTION_REGENERATION	GOBP_NEURON_PROJECTION_REGENERATION	GOBP_NEURON_PROJECTION_REGENERATION	2/171	59/17872	0.109445821144672	0.361528653361248	0.307096893577748	TSPO/GRN	2
GOBP_LYSOSOMAL_TRANSPORT	GOBP_LYSOSOMAL_TRANSPORT	GOBP_LYSOSOMAL_TRANSPORT	3/171	122/17872	0.112034733672999	0.368873961014114	0.31333629159391	GRN/HSPA8/ZFYVE16	3
GOBP_NEGATIVE_REGULATION_OF_PROTEIN_SERINE_THREONINE_KINASE_ACTIVITY	GOBP_NEGATIVE_REGULATION_OF_PROTEIN_SERINE_THREONINE_KINASE_ACTIVITY	GOBP_NEGATIVE_REGULATION_OF_PROTEIN_SERINE_THREONINE_KINASE_ACTIVITY	3/171	122/17872	0.112034733672999	0.368873961014114	0.31333629159391	APOE/PYCARD/GSTP1	3
GOBP_AUTOPHAGOSOME_MATURATION	GOBP_AUTOPHAGOSOME_MATURATION	GOBP_AUTOPHAGOSOME_MATURATION	2/171	60/17872	0.112537818614476	0.368873961014114	0.31333629159391	VAMP8/MAP1LC3B	2
GOBP_NEGATIVE_REGULATION_OF_MAP_KINASE_ACTIVITY	GOBP_NEGATIVE_REGULATION_OF_MAP_KINASE_ACTIVITY	GOBP_NEGATIVE_REGULATION_OF_MAP_KINASE_ACTIVITY	2/171	60/17872	0.112537818614476	0.368873961014114	0.31333629159391	APOE/GSTP1	2
GOBP_REGULATION_OF_JUN_KINASE_ACTIVITY	GOBP_REGULATION_OF_JUN_KINASE_ACTIVITY	GOBP_REGULATION_OF_JUN_KINASE_ACTIVITY	2/171	60/17872	0.112537818614476	0.368873961014114	0.31333629159391	RPS3/GSTP1	2
GOBP_BIOLOGICAL_PROCESS_INVOLVED_IN_INTERACTION_WITH_HOST	GOBP_BIOLOGICAL_PROCESS_INVOLVED_IN_INTERACTION_WITH_HOST	GOBP_BIOLOGICAL_PROCESS_INVOLVED_IN_INTERACTION_WITH_HOST	4/171	192/17872	0.11276901913681	0.369062244447743	0.313496227070786	VAMP8/ANPEP/LGALS1/FCN1	4
GOBP_NEGATIVE_REGULATION_OF_DEFENSE_RESPONSE	GOBP_NEGATIVE_REGULATION_OF_DEFENSE_RESPONSE	GOBP_NEGATIVE_REGULATION_OF_DEFENSE_RESPONSE	5/171	268/17872	0.115090446344859	0.370935758470129	0.31508766479225	GPX1/GRN/APOE/GSTP1/RPS19	5
GOBP_NEGATIVE_REGULATION_OF_LIPID_BIOSYNTHETIC_PROCESS	GOBP_NEGATIVE_REGULATION_OF_LIPID_BIOSYNTHETIC_PROCESS	GOBP_NEGATIVE_REGULATION_OF_LIPID_BIOSYNTHETIC_PROCESS	2/171	61/17872	0.115652388759136	0.370935758470129	0.31508766479225	APOE/APOC1	2
GOBP_PRESYNAPTIC_ENDOCYTOSIS	GOBP_PRESYNAPTIC_ENDOCYTOSIS	GOBP_PRESYNAPTIC_ENDOCYTOSIS	2/171	61/17872	0.115652388759136	0.370935758470129	0.31508766479225	ACTB/ACTG1	2
GOBP_REACTIVE_OXYGEN_SPECIES_BIOSYNTHETIC_PROCESS	GOBP_REACTIVE_OXYGEN_SPECIES_BIOSYNTHETIC_PROCESS	GOBP_REACTIVE_OXYGEN_SPECIES_BIOSYNTHETIC_PROCESS	2/171	61/17872	0.115652388759136	0.370935758470129	0.31508766479225	CYBA/CD36	2
GOBP_REGULATION_OF_PROTEIN_IMPORT	GOBP_REGULATION_OF_PROTEIN_IMPORT	GOBP_REGULATION_OF_PROTEIN_IMPORT	2/171	61/17872	0.115652388759136	0.370935758470129	0.31508766479225	HSPA8/CD36	2
GOBP_FRUCTOSE_METABOLIC_PROCESS	GOBP_FRUCTOSE_METABOLIC_PROCESS	GOBP_FRUCTOSE_METABOLIC_PROCESS	1/171	13/17872	0.117525666813551	0.370935758470129	0.31508766479225	ALDOA	1
GOBP_HEMOGLOBIN_BIOSYNTHETIC_PROCESS	GOBP_HEMOGLOBIN_BIOSYNTHETIC_PROCESS	GOBP_HEMOGLOBIN_BIOSYNTHETIC_PROCESS	1/171	13/17872	0.117525666813551	0.370935758470129	0.31508766479225	HIF1A	1
GOBP_MODIFICATION_OF_POSTSYNAPTIC_STRUCTURE	GOBP_MODIFICATION_OF_POSTSYNAPTIC_STRUCTURE	GOBP_MODIFICATION_OF_POSTSYNAPTIC_STRUCTURE	1/171	13/17872	0.117525666813551	0.370935758470129	0.31508766479225	PFN1	1
GOBP_NEGATIVE_REGULATION_OF_COLLAGEN_METABOLIC_PROCESS	GOBP_NEGATIVE_REGULATION_OF_COLLAGEN_METABOLIC_PROCESS	GOBP_NEGATIVE_REGULATION_OF_COLLAGEN_METABOLIC_PROCESS	1/171	13/17872	0.117525666813551	0.370935758470129	0.31508766479225	CST3	1
GOBP_NEGATIVE_REGULATION_OF_EXTRACELLULAR_MATRIX_ORGANIZATION	GOBP_NEGATIVE_REGULATION_OF_EXTRACELLULAR_MATRIX_ORGANIZATION	GOBP_NEGATIVE_REGULATION_OF_EXTRACELLULAR_MATRIX_ORGANIZATION	1/171	13/17872	0.117525666813551	0.370935758470129	0.31508766479225	CST3	1
GOBP_NEGATIVE_REGULATION_OF_GLIAL_CELL_PROLIFERATION	GOBP_NEGATIVE_REGULATION_OF_GLIAL_CELL_PROLIFERATION	GOBP_NEGATIVE_REGULATION_OF_GLIAL_CELL_PROLIFERATION	1/171	13/17872	0.117525666813551	0.370935758470129	0.31508766479225	TSPO	1
GOBP_NEGATIVE_REGULATION_OF_LIPOPOLYSACCHARIDE_MEDIATED_SIGNALING_PATHWAY	GOBP_NEGATIVE_REGULATION_OF_LIPOPOLYSACCHARIDE_MEDIATED_SIGNALING_PATHWAY	GOBP_NEGATIVE_REGULATION_OF_LIPOPOLYSACCHARIDE_MEDIATED_SIGNALING_PATHWAY	1/171	13/17872	0.117525666813551	0.370935758470129	0.31508766479225	CARD16	1
GOBP_POSITIVE_REGULATION_OF_AUTOPHAGY_OF_MITOCHONDRION	GOBP_POSITIVE_REGULATION_OF_AUTOPHAGY_OF_MITOCHONDRION	GOBP_POSITIVE_REGULATION_OF_AUTOPHAGY_OF_MITOCHONDRION	1/171	13/17872	0.117525666813551	0.370935758470129	0.31508766479225	HIF1A	1
GOBP_POSITIVE_REGULATION_OF_CYTOPLASMIC_TRANSPORT	GOBP_POSITIVE_REGULATION_OF_CYTOPLASMIC_TRANSPORT	GOBP_POSITIVE_REGULATION_OF_CYTOPLASMIC_TRANSPORT	1/171	13/17872	0.117525666813551	0.370935758470129	0.31508766479225	EZR	1
GOBP_POSITIVE_REGULATION_OF_NEURON_PROJECTION_REGENERATION	GOBP_POSITIVE_REGULATION_OF_NEURON_PROJECTION_REGENERATION	GOBP_POSITIVE_REGULATION_OF_NEURON_PROJECTION_REGENERATION	1/171	13/17872	0.117525666813551	0.370935758470129	0.31508766479225	GRN	1
GOBP_POSITIVE_REGULATION_OF_SYSTEMIC_ARTERIAL_BLOOD_PRESSURE	GOBP_POSITIVE_REGULATION_OF_SYSTEMIC_ARTERIAL_BLOOD_PRESSURE	GOBP_POSITIVE_REGULATION_OF_SYSTEMIC_ARTERIAL_BLOOD_PRESSURE	1/171	13/17872	0.117525666813551	0.370935758470129	0.31508766479225	CYBA	1
GOBP_REGULATION_OF_CELL_PROJECTION_SIZE	GOBP_REGULATION_OF_CELL_PROJECTION_SIZE	GOBP_REGULATION_OF_CELL_PROJECTION_SIZE	1/171	13/17872	0.117525666813551	0.370935758470129	0.31508766479225	EZR	1
GOBP_REGULATION_OF_MICROVILLUS_ORGANIZATION	GOBP_REGULATION_OF_MICROVILLUS_ORGANIZATION	GOBP_REGULATION_OF_MICROVILLUS_ORGANIZATION	1/171	13/17872	0.117525666813551	0.370935758470129	0.31508766479225	EZR	1
GOBP_REGULATION_OF_PHOSPHOLIPASE_A2_ACTIVITY	GOBP_REGULATION_OF_PHOSPHOLIPASE_A2_ACTIVITY	GOBP_REGULATION_OF_PHOSPHOLIPASE_A2_ACTIVITY	1/171	13/17872	0.117525666813551	0.370935758470129	0.31508766479225	PPT1	1
GOBP_REGULATION_OF_RNA_POLYMERASE_II_REGULATORY_REGION_SEQUENCE_SPECIFIC_DNA_BINDING	GOBP_REGULATION_OF_RNA_POLYMERASE_II_REGULATORY_REGION_SEQUENCE_SPECIFIC_DNA_BINDING	GOBP_REGULATION_OF_RNA_POLYMERASE_II_REGULATORY_REGION_SEQUENCE_SPECIFIC_DNA_BINDING	1/171	13/17872	0.117525666813551	0.370935758470129	0.31508766479225	TMSB4X	1
GOBP_REGULATION_OF_TRANSCRIPTION_FROM_RNA_POLYMERASE_II_PROMOTER_IN_RESPONSE_TO_HYPOXIA	GOBP_REGULATION_OF_TRANSCRIPTION_FROM_RNA_POLYMERASE_II_PROMOTER_IN_RESPONSE_TO_HYPOXIA	GOBP_REGULATION_OF_TRANSCRIPTION_FROM_RNA_POLYMERASE_II_PROMOTER_IN_RESPONSE_TO_HYPOXIA	1/171	13/17872	0.117525666813551	0.370935758470129	0.31508766479225	HIF1A	1
GOBP_SERTOLI_CELL_DEVELOPMENT	GOBP_SERTOLI_CELL_DEVELOPMENT	GOBP_SERTOLI_CELL_DEVELOPMENT	1/171	13/17872	0.117525666813551	0.370935758470129	0.31508766479225	FNDC3A	1
GOBP_UV_PROTECTION	GOBP_UV_PROTECTION	GOBP_UV_PROTECTION	1/171	13/17872	0.117525666813551	0.370935758470129	0.31508766479225	GPX1	1
GOBP_POSITIVE_REGULATION_OF_CYTOSKELETON_ORGANIZATION	GOBP_POSITIVE_REGULATION_OF_CYTOSKELETON_ORGANIZATION	GOBP_POSITIVE_REGULATION_OF_CYTOSKELETON_ORGANIZATION	4/171	195/17872	0.117532846257249	0.370935758470129	0.31508766479225	PFN1/RPS3/PYCARD/ARPC2	4
GOBP_NEGATIVE_REGULATION_OF_PROTEOLYSIS	GOBP_NEGATIVE_REGULATION_OF_PROTEOLYSIS	GOBP_NEGATIVE_REGULATION_OF_PROTEOLYSIS	6/171	348/17872	0.11771522491857	0.370960144995611	0.315108379682068	GPX1/RPL11/CSTB/CST3/TMEM59/CARD16	6
GOBP_PROTEIN_LOCALIZATION_TO_MITOCHONDRION	GOBP_PROTEIN_LOCALIZATION_TO_MITOCHONDRION	GOBP_PROTEIN_LOCALIZATION_TO_MITOCHONDRION	3/171	125/17872	0.118188632980771	0.371900231779494	0.315906926984861	TSPO/USP36/HSP90AA1	3
GOBP_RESPONSE_TO_METAL_ION	GOBP_RESPONSE_TO_METAL_ION	GOBP_RESPONSE_TO_METAL_ION	6/171	350/17872	0.12005670986825	0.375802906516647	0.319222014951697	HIF1A/TSPO/CD14/LTA4H/ACTG1/S100A8	6
GOBP_TOLL_LIKE_RECEPTOR_SIGNALING_PATHWAY	GOBP_TOLL_LIKE_RECEPTOR_SIGNALING_PATHWAY	GOBP_TOLL_LIKE_RECEPTOR_SIGNALING_PATHWAY	3/171	126/17872	0.12026759809497	0.375802906516647	0.319222014951697	CYBA/CD14/CD36	3
GOBP_POSITIVE_REGULATION_OF_INTRACELLULAR_TRANSPORT	GOBP_POSITIVE_REGULATION_OF_INTRACELLULAR_TRANSPORT	GOBP_POSITIVE_REGULATION_OF_INTRACELLULAR_TRANSPORT	4/171	197/17872	0.120757018691507	0.375802906516647	0.319222014951697	OAZ1/ITGB2/USP36/EZR	4
GOBP_ANTIGEN_PROCESSING_AND_PRESENTATION_OF_PEPTIDE_ANTIGEN	GOBP_ANTIGEN_PROCESSING_AND_PRESENTATION_OF_PEPTIDE_ANTIGEN	GOBP_ANTIGEN_PROCESSING_AND_PRESENTATION_OF_PEPTIDE_ANTIGEN	2/171	63/17872	0.121946424926206	0.375802906516647	0.319222014951697	PYCARD/FCER1G	2
GOBP_INTERLEUKIN_10_PRODUCTION	GOBP_INTERLEUKIN_10_PRODUCTION	GOBP_INTERLEUKIN_10_PRODUCTION	2/171	63/17872	0.121946424926206	0.375802906516647	0.319222014951697	TYROBP/PYCARD	2
GOBP_SYNCYTIUM_FORMATION	GOBP_SYNCYTIUM_FORMATION	GOBP_SYNCYTIUM_FORMATION	2/171	63/17872	0.121946424926206	0.375802906516647	0.319222014951697	TYROBP/CD9	2
GOBP_VASCULAR_ENDOTHELIAL_GROWTH_FACTOR_PRODUCTION	GOBP_VASCULAR_ENDOTHELIAL_GROWTH_FACTOR_PRODUCTION	GOBP_VASCULAR_ENDOTHELIAL_GROWTH_FACTOR_PRODUCTION	2/171	63/17872	0.121946424926206	0.375802906516647	0.319222014951697	HIF1A/SULF2	2
GOBP_T_CELL_RECEPTOR_SIGNALING_PATHWAY	GOBP_T_CELL_RECEPTOR_SIGNALING_PATHWAY	GOBP_T_CELL_RECEPTOR_SIGNALING_PATHWAY	3/171	127/17872	0.122360096061776	0.375802906516647	0.319222014951697	RPS3/EZR/MALT1	3
GOBP_REGULATION_OF_CATION_TRANSMEMBRANE_TRANSPORT	GOBP_REGULATION_OF_CATION_TRANSMEMBRANE_TRANSPORT	GOBP_REGULATION_OF_CATION_TRANSMEMBRANE_TRANSPORT	6/171	353/17872	0.123612363951787	0.375802906516647	0.319222014951697	TMSB4X/CYBA/CD63/OXSR1/NDUFA4/FXYD5	6
GOBP_MONONUCLEAR_CELL_MIGRATION	GOBP_MONONUCLEAR_CELL_MIGRATION	GOBP_MONONUCLEAR_CELL_MIGRATION	4/171	199/17872	0.12401915089736	0.375802906516647	0.319222014951697	AIF1/PYCARD/RPS19/OXSR1	4
GOBP_POSITIVE_REGULATION_OF_PROTEIN_SECRETION	GOBP_POSITIVE_REGULATION_OF_PROTEIN_SECRETION	GOBP_POSITIVE_REGULATION_OF_PROTEIN_SECRETION	3/171	128/17872	0.124465946394307	0.375802906516647	0.319222014951697	HIF1A/EZR/SERP1	3
GOBP_RESPONSE_TO_HYDROGEN_PEROXIDE	GOBP_RESPONSE_TO_HYDROGEN_PEROXIDE	GOBP_RESPONSE_TO_HYDROGEN_PEROXIDE	3/171	128/17872	0.124465946394307	0.375802906516647	0.319222014951697	GPX1/RPS3/RACK1	3
GOBP_EXTRACELLULAR_MATRIX_DISASSEMBLY	GOBP_EXTRACELLULAR_MATRIX_DISASSEMBLY	GOBP_EXTRACELLULAR_MATRIX_DISASSEMBLY	2/171	64/17872	0.125124508084291	0.375802906516647	0.319222014951697	CST3/CAPG	2
GOBP_REGULATION_OF_B_CELL_PROLIFERATION	GOBP_REGULATION_OF_B_CELL_PROLIFERATION	GOBP_REGULATION_OF_B_CELL_PROLIFERATION	2/171	64/17872	0.125124508084291	0.375802906516647	0.319222014951697	TYROBP/MNDA	2
GOBP_REGULATION_OF_EMBRYONIC_DEVELOPMENT	GOBP_REGULATION_OF_EMBRYONIC_DEVELOPMENT	GOBP_REGULATION_OF_EMBRYONIC_DEVELOPMENT	2/171	64/17872	0.125124508084291	0.375802906516647	0.319222014951697	RACK1/CFL1	2
GOBP_REGULATION_OF_GLYCOPROTEIN_METABOLIC_PROCESS	GOBP_REGULATION_OF_GLYCOPROTEIN_METABOLIC_PROCESS	GOBP_REGULATION_OF_GLYCOPROTEIN_METABOLIC_PROCESS	2/171	64/17872	0.125124508084291	0.375802906516647	0.319222014951697	CST3/TMEM59	2
GOBP_MITOCHONDRIAL_TRANSPORT	GOBP_MITOCHONDRIAL_TRANSPORT	GOBP_MITOCHONDRIAL_TRANSPORT	4/171	200/17872	0.125664269200817	0.375802906516647	0.319222014951697	TSPO/ATP5MG/USP36/HSP90AA1	4
GOBP_PURINE_CONTAINING_COMPOUND_BIOSYNTHETIC_PROCESS	GOBP_PURINE_CONTAINING_COMPOUND_BIOSYNTHETIC_PROCESS	GOBP_PURINE_CONTAINING_COMPOUND_BIOSYNTHETIC_PROCESS	4/171	200/17872	0.125664269200817	0.375802906516647	0.319222014951697	TMSB4X/ATP5MG/ALDOA/PPT1	4
GOBP_ACTIN_CROSSLINK_FORMATION	GOBP_ACTIN_CROSSLINK_FORMATION	GOBP_ACTIN_CROSSLINK_FORMATION	1/171	14/17872	0.125975362259818	0.375802906516647	0.319222014951697	AIF1	1
GOBP_AMINO_SUGAR_CATABOLIC_PROCESS	GOBP_AMINO_SUGAR_CATABOLIC_PROCESS	GOBP_AMINO_SUGAR_CATABOLIC_PROCESS	1/171	14/17872	0.125975362259818	0.375802906516647	0.319222014951697	NPL	1
GOBP_CDP_DIACYLGLYCEROL_METABOLIC_PROCESS	GOBP_CDP_DIACYLGLYCEROL_METABOLIC_PROCESS	GOBP_CDP_DIACYLGLYCEROL_METABOLIC_PROCESS	1/171	14/17872	0.125975362259818	0.375802906516647	0.319222014951697	GPAT3	1
GOBP_INTESTINAL_EPITHELIAL_CELL_DEVELOPMENT	GOBP_INTESTINAL_EPITHELIAL_CELL_DEVELOPMENT	GOBP_INTESTINAL_EPITHELIAL_CELL_DEVELOPMENT	1/171	14/17872	0.125975362259818	0.375802906516647	0.319222014951697	HIF1A	1
GOBP_MACROMOLECULE_DEPALMITOYLATION	GOBP_MACROMOLECULE_DEPALMITOYLATION	GOBP_MACROMOLECULE_DEPALMITOYLATION	1/171	14/17872	0.125975362259818	0.375802906516647	0.319222014951697	PPT1	1
GOBP_NEGATIVE_REGULATION_OF_HOMOTYPIC_CELL_CELL_ADHESION	GOBP_NEGATIVE_REGULATION_OF_HOMOTYPIC_CELL_CELL_ADHESION	GOBP_NEGATIVE_REGULATION_OF_HOMOTYPIC_CELL_CELL_ADHESION	1/171	14/17872	0.125975362259818	0.375802906516647	0.319222014951697	CD9	1
GOBP_NEGATIVE_REGULATION_OF_INTERFERON_BETA_PRODUCTION	GOBP_NEGATIVE_REGULATION_OF_INTERFERON_BETA_PRODUCTION	GOBP_NEGATIVE_REGULATION_OF_INTERFERON_BETA_PRODUCTION	1/171	14/17872	0.125975362259818	0.375802906516647	0.319222014951697	PYCARD	1
GOBP_NEGATIVE_REGULATION_OF_PROTEIN_IMPORT_INTO_NUCLEUS	GOBP_NEGATIVE_REGULATION_OF_PROTEIN_IMPORT_INTO_NUCLEUS	GOBP_NEGATIVE_REGULATION_OF_PROTEIN_IMPORT_INTO_NUCLEUS	1/171	14/17872	0.125975362259818	0.375802906516647	0.319222014951697	CD36	1
GOBP_NEUROTRANSMITTER_GATED_ION_CHANNEL_CLUSTERING	GOBP_NEUROTRANSMITTER_GATED_ION_CHANNEL_CLUSTERING	GOBP_NEUROTRANSMITTER_GATED_ION_CHANNEL_CLUSTERING	1/171	14/17872	0.125975362259818	0.375802906516647	0.319222014951697	APOE	1
GOBP_PHOSPHATIDYLCHOLINE_ACYL_CHAIN_REMODELING	GOBP_PHOSPHATIDYLCHOLINE_ACYL_CHAIN_REMODELING	GOBP_PHOSPHATIDYLCHOLINE_ACYL_CHAIN_REMODELING	1/171	14/17872	0.125975362259818	0.375802906516647	0.319222014951697	DBI	1
GOBP_POSITIVE_REGULATION_OF_ATP_BIOSYNTHETIC_PROCESS	GOBP_POSITIVE_REGULATION_OF_ATP_BIOSYNTHETIC_PROCESS	GOBP_POSITIVE_REGULATION_OF_ATP_BIOSYNTHETIC_PROCESS	1/171	14/17872	0.125975362259818	0.375802906516647	0.319222014951697	TMSB4X	1
GOBP_POSITIVE_REGULATION_OF_HORMONE_METABOLIC_PROCESS	GOBP_POSITIVE_REGULATION_OF_HORMONE_METABOLIC_PROCESS	GOBP_POSITIVE_REGULATION_OF_HORMONE_METABOLIC_PROCESS	1/171	14/17872	0.125975362259818	0.375802906516647	0.319222014951697	HIF1A	1
GOBP_POSITIVE_REGULATION_OF_MUSCLE_ADAPTATION	GOBP_POSITIVE_REGULATION_OF_MUSCLE_ADAPTATION	GOBP_POSITIVE_REGULATION_OF_MUSCLE_ADAPTATION	1/171	14/17872	0.125975362259818	0.375802906516647	0.319222014951697	AIF1	1
GOBP_POSITIVE_REGULATION_OF_T_HELPER_17_TYPE_IMMUNE_RESPONSE	GOBP_POSITIVE_REGULATION_OF_T_HELPER_17_TYPE_IMMUNE_RESPONSE	GOBP_POSITIVE_REGULATION_OF_T_HELPER_17_TYPE_IMMUNE_RESPONSE	1/171	14/17872	0.125975362259818	0.375802906516647	0.319222014951697	MALT1	1
GOBP_PROTEIN_OXIDATION	GOBP_PROTEIN_OXIDATION	GOBP_PROTEIN_OXIDATION	1/171	14/17872	0.125975362259818	0.375802906516647	0.319222014951697	GPX1	1
GOBP_REGULATION_OF_TAU_PROTEIN_KINASE_ACTIVITY	GOBP_REGULATION_OF_TAU_PROTEIN_KINASE_ACTIVITY	GOBP_REGULATION_OF_TAU_PROTEIN_KINASE_ACTIVITY	1/171	14/17872	0.125975362259818	0.375802906516647	0.319222014951697	HSP90AA1	1
GOBP_RESPONSE_TO_INTERLEUKIN_7	GOBP_RESPONSE_TO_INTERLEUKIN_7	GOBP_RESPONSE_TO_INTERLEUKIN_7	1/171	14/17872	0.125975362259818	0.375802906516647	0.319222014951697	YBX1	1
GOBP_RESPONSE_TO_UV_C	GOBP_RESPONSE_TO_UV_C	GOBP_RESPONSE_TO_UV_C	1/171	14/17872	0.125975362259818	0.375802906516647	0.319222014951697	CARD16	1
GOBP_RIBOSOMAL_SUBUNIT_EXPORT_FROM_NUCLEUS	GOBP_RIBOSOMAL_SUBUNIT_EXPORT_FROM_NUCLEUS	GOBP_RIBOSOMAL_SUBUNIT_EXPORT_FROM_NUCLEUS	1/171	14/17872	0.125975362259818	0.375802906516647	0.319222014951697	RPS15	1
GOBP_RESPONSE_TO_ACID_CHEMICAL	GOBP_RESPONSE_TO_ACID_CHEMICAL	GOBP_RESPONSE_TO_ACID_CHEMICAL	3/171	129/17872	0.126584968275571	0.377091826952752	0.320316875506501	CYBA/LAMTOR2/LAMTOR4	3
GOBP_GLUCOSE_METABOLIC_PROCESS	GOBP_GLUCOSE_METABOLIC_PROCESS	GOBP_GLUCOSE_METABOLIC_PROCESS	4/171	201/17872	0.127318656990387	0.378746256929386	0.321722214479615	RANBP2/FABP5/SERP1/TPI1	4
GOBP_HORMONE_BIOSYNTHETIC_PROCESS	GOBP_HORMONE_BIOSYNTHETIC_PROCESS	GOBP_HORMONE_BIOSYNTHETIC_PROCESS	2/171	65/17872	0.128322397890218	0.379605533591677	0.322452118434004	HIF1A/TSPO	2
GOBP_LYMPHOCYTE_HOMEOSTASIS	GOBP_LYMPHOCYTE_HOMEOSTASIS	GOBP_LYMPHOCYTE_HOMEOSTASIS	2/171	65/17872	0.128322397890218	0.379605533591677	0.322452118434004	HIF1A/RPS6	2
GOBP_RESPONSE_TO_ACTIVITY	GOBP_RESPONSE_TO_ACTIVITY	GOBP_RESPONSE_TO_ACTIVITY	2/171	65/17872	0.128322397890218	0.379605533591677	0.322452118434004	CYBA/HIF1A	2
GOBP_TRANSCRIPTION_ELONGATION_FROM_RNA_POLYMERASE_II_PROMOTER	GOBP_TRANSCRIPTION_ELONGATION_FROM_RNA_POLYMERASE_II_PROMOTER	GOBP_TRANSCRIPTION_ELONGATION_FROM_RNA_POLYMERASE_II_PROMOTER	2/171	65/17872	0.128322397890218	0.379605533591677	0.322452118434004	SUPT4H1/ELOB	2
GOBP_NUCLEOSIDE_DIPHOSPHATE_METABOLIC_PROCESS	GOBP_NUCLEOSIDE_DIPHOSPHATE_METABOLIC_PROCESS	GOBP_NUCLEOSIDE_DIPHOSPHATE_METABOLIC_PROCESS	3/171	130/17872	0.128716980604556	0.379957355353774	0.32275096990602	HIF1A/ALDOA/TPI1	3
GOBP_LYMPHOCYTE_ACTIVATION_INVOLVED_IN_IMMUNE_RESPONSE	GOBP_LYMPHOCYTE_ACTIVATION_INVOLVED_IN_IMMUNE_RESPONSE	GOBP_LYMPHOCYTE_ACTIVATION_INVOLVED_IN_IMMUNE_RESPONSE	4/171	202/17872	0.12898223955864	0.379957355353774	0.32275096990602	RPS6/FCER1G/LGALS1/MALT1	4
GOBP_TETRAPYRROLE_METABOLIC_PROCESS	GOBP_TETRAPYRROLE_METABOLIC_PROCESS	GOBP_TETRAPYRROLE_METABOLIC_PROCESS	2/171	66/17872	0.131539430452731	0.379957355353774	0.32275096990602	TSPO/BLVRB	2
GOBP_NEGATIVE_REGULATION_OF_PHOSPHORUS_METABOLIC_PROCESS	GOBP_NEGATIVE_REGULATION_OF_PHOSPHORUS_METABOLIC_PROCESS	GOBP_NEGATIVE_REGULATION_OF_PHOSPHORUS_METABOLIC_PROCESS	7/171	442/17872	0.132300298435205	0.379957355353774	0.32275096990602	RACK1/APOE/PYCARD/DYNLL1/APOC1/GSTP1/YWHAB	7
GOBP_ENDOTHELIAL_CELL_MIGRATION	GOBP_ENDOTHELIAL_CELL_MIGRATION	GOBP_ENDOTHELIAL_CELL_MIGRATION	5/171	281/17872	0.132911644393174	0.379957355353774	0.32275096990602	TMSB4X/GPX1/HIF1A/GRN/APOE	5
GOBP_POSITIVE_REGULATION_OF_ENDOTHELIAL_CELL_MIGRATION	GOBP_POSITIVE_REGULATION_OF_ENDOTHELIAL_CELL_MIGRATION	GOBP_POSITIVE_REGULATION_OF_ENDOTHELIAL_CELL_MIGRATION	3/171	132/17872	0.133019251050695	0.379957355353774	0.32275096990602	TMSB4X/HIF1A/GRN	3
GOBP_APICAL_PROTEIN_LOCALIZATION	GOBP_APICAL_PROTEIN_LOCALIZATION	GOBP_APICAL_PROTEIN_LOCALIZATION	1/171	15/17872	0.134344620466424	0.379957355353774	0.32275096990602	ACTB	1
GOBP_CDC42_PROTEIN_SIGNAL_TRANSDUCTION	GOBP_CDC42_PROTEIN_SIGNAL_TRANSDUCTION	GOBP_CDC42_PROTEIN_SIGNAL_TRANSDUCTION	1/171	15/17872	0.134344620466424	0.379957355353774	0.32275096990602	APOE	1
GOBP_CYTOPLASMIC_SEQUESTERING_OF_TRANSCRIPTION_FACTOR	GOBP_CYTOPLASMIC_SEQUESTERING_OF_TRANSCRIPTION_FACTOR	GOBP_CYTOPLASMIC_SEQUESTERING_OF_TRANSCRIPTION_FACTOR	1/171	15/17872	0.134344620466424	0.379957355353774	0.32275096990602	TMSB4X	1
GOBP_EPITHELIAL_CELL_MATURATION	GOBP_EPITHELIAL_CELL_MATURATION	GOBP_EPITHELIAL_CELL_MATURATION	1/171	15/17872	0.134344620466424	0.379957355353774	0.32275096990602	HIF1A	1
GOBP_HIGH_DENSITY_LIPOPROTEIN_PARTICLE_ASSEMBLY	GOBP_HIGH_DENSITY_LIPOPROTEIN_PARTICLE_ASSEMBLY	GOBP_HIGH_DENSITY_LIPOPROTEIN_PARTICLE_ASSEMBLY	1/171	15/17872	0.134344620466424	0.379957355353774	0.32275096990602	APOE	1
GOBP_HIGH_DENSITY_LIPOPROTEIN_PARTICLE_CLEARANCE	GOBP_HIGH_DENSITY_LIPOPROTEIN_PARTICLE_CLEARANCE	GOBP_HIGH_DENSITY_LIPOPROTEIN_PARTICLE_CLEARANCE	1/171	15/17872	0.134344620466424	0.379957355353774	0.32275096990602	APOE	1
GOBP_HISTAMINE_TRANSPORT	GOBP_HISTAMINE_TRANSPORT	GOBP_HISTAMINE_TRANSPORT	1/171	15/17872	0.134344620466424	0.379957355353774	0.32275096990602	VAMP8	1
GOBP_MATURATION_OF_LSU_RRNA_FROM_TRICISTRONIC_RRNA_TRANSCRIPT_SSU_RRNA_5_8S_RRNA_LSU_RRNA	GOBP_MATURATION_OF_LSU_RRNA_FROM_TRICISTRONIC_RRNA_TRANSCRIPT_SSU_RRNA_5_8S_RRNA_LSU_RRNA	GOBP_MATURATION_OF_LSU_RRNA_FROM_TRICISTRONIC_RRNA_TRANSCRIPT_SSU_RRNA_5_8S_RRNA_LSU_RRNA	1/171	15/17872	0.134344620466424	0.379957355353774	0.32275096990602	RPL7	1
GOBP_MESENCHYMAL_CELL_APOPTOTIC_PROCESS	GOBP_MESENCHYMAL_CELL_APOPTOTIC_PROCESS	GOBP_MESENCHYMAL_CELL_APOPTOTIC_PROCESS	1/171	15/17872	0.134344620466424	0.379957355353774	0.32275096990602	HIF1A	1
GOBP_NEGATIVE_REGULATION_OF_ENDOPLASMIC_RETICULUM_UNFOLDED_PROTEIN_RESPONSE	GOBP_NEGATIVE_REGULATION_OF_ENDOPLASMIC_RETICULUM_UNFOLDED_PROTEIN_RESPONSE	GOBP_NEGATIVE_REGULATION_OF_ENDOPLASMIC_RETICULUM_UNFOLDED_PROTEIN_RESPONSE	1/171	15/17872	0.134344620466424	0.379957355353774	0.32275096990602	RACK1	1
GOBP_POLYAMINE_BIOSYNTHETIC_PROCESS	GOBP_POLYAMINE_BIOSYNTHETIC_PROCESS	GOBP_POLYAMINE_BIOSYNTHETIC_PROCESS	1/171	15/17872	0.134344620466424	0.379957355353774	0.32275096990602	OAZ1	1
GOBP_POSITIVE_REGULATION_OF_CYTOPLASMIC_TRANSLATION	GOBP_POSITIVE_REGULATION_OF_CYTOPLASMIC_TRANSLATION	GOBP_POSITIVE_REGULATION_OF_CYTOPLASMIC_TRANSLATION	1/171	15/17872	0.134344620466424	0.379957355353774	0.32275096990602	YBX1	1
GOBP_POSITIVE_REGULATION_OF_ENDOTHELIAL_CELL_CHEMOTAXIS	GOBP_POSITIVE_REGULATION_OF_ENDOTHELIAL_CELL_CHEMOTAXIS	GOBP_POSITIVE_REGULATION_OF_ENDOTHELIAL_CELL_CHEMOTAXIS	1/171	15/17872	0.134344620466424	0.379957355353774	0.32275096990602	TMSB4X	1
GOBP_POSITIVE_REGULATION_OF_MAST_CELL_ACTIVATION_INVOLVED_IN_IMMUNE_RESPONSE	GOBP_POSITIVE_REGULATION_OF_MAST_CELL_ACTIVATION_INVOLVED_IN_IMMUNE_RESPONSE	GOBP_POSITIVE_REGULATION_OF_MAST_CELL_ACTIVATION_INVOLVED_IN_IMMUNE_RESPONSE	1/171	15/17872	0.134344620466424	0.379957355353774	0.32275096990602	VAMP8	1
GOBP_POSITIVE_REGULATION_OF_RUFFLE_ASSEMBLY	GOBP_POSITIVE_REGULATION_OF_RUFFLE_ASSEMBLY	GOBP_POSITIVE_REGULATION_OF_RUFFLE_ASSEMBLY	1/171	15/17872	0.134344620466424	0.379957355353774	0.32275096990602	PFN1	1
GOBP_POSITIVE_REGULATION_OF_TELOMERASE_RNA_LOCALIZATION_TO_CAJAL_BODY	GOBP_POSITIVE_REGULATION_OF_TELOMERASE_RNA_LOCALIZATION_TO_CAJAL_BODY	GOBP_POSITIVE_REGULATION_OF_TELOMERASE_RNA_LOCALIZATION_TO_CAJAL_BODY	1/171	15/17872	0.134344620466424	0.379957355353774	0.32275096990602	NOP10	1
GOBP_POSTTRANSLATIONAL_PROTEIN_TARGETING_TO_ENDOPLASMIC_RETICULUM_MEMBRANE	GOBP_POSTTRANSLATIONAL_PROTEIN_TARGETING_TO_ENDOPLASMIC_RETICULUM_MEMBRANE	GOBP_POSTTRANSLATIONAL_PROTEIN_TARGETING_TO_ENDOPLASMIC_RETICULUM_MEMBRANE	1/171	15/17872	0.134344620466424	0.379957355353774	0.32275096990602	SEC62	1
GOBP_REGULATION_OF_GRANULOCYTE_DIFFERENTIATION	GOBP_REGULATION_OF_GRANULOCYTE_DIFFERENTIATION	GOBP_REGULATION_OF_GRANULOCYTE_DIFFERENTIATION	1/171	15/17872	0.134344620466424	0.379957355353774	0.32275096990602	C1QC	1
GOBP_REGULATION_OF_MAMMARY_GLAND_EPITHELIAL_CELL_PROLIFERATION	GOBP_REGULATION_OF_MAMMARY_GLAND_EPITHELIAL_CELL_PROLIFERATION	GOBP_REGULATION_OF_MAMMARY_GLAND_EPITHELIAL_CELL_PROLIFERATION	1/171	15/17872	0.134344620466424	0.379957355353774	0.32275096990602	GPX1	1
GOBP_REGULATION_OF_MEMBRANE_INVAGINATION	GOBP_REGULATION_OF_MEMBRANE_INVAGINATION	GOBP_REGULATION_OF_MEMBRANE_INVAGINATION	1/171	15/17872	0.134344620466424	0.379957355353774	0.32275096990602	CD36	1
GOBP_REGULATION_OF_PEROXISOME_PROLIFERATOR_ACTIVATED_RECEPTOR_SIGNALING_PATHWAY	GOBP_REGULATION_OF_PEROXISOME_PROLIFERATOR_ACTIVATED_RECEPTOR_SIGNALING_PATHWAY	GOBP_REGULATION_OF_PEROXISOME_PROLIFERATOR_ACTIVATED_RECEPTOR_SIGNALING_PATHWAY	1/171	15/17872	0.134344620466424	0.379957355353774	0.32275096990602	FABP5	1
GOBP_REGULATION_OF_PODOSOME_ASSEMBLY	GOBP_REGULATION_OF_PODOSOME_ASSEMBLY	GOBP_REGULATION_OF_PODOSOME_ASSEMBLY	1/171	15/17872	0.134344620466424	0.379957355353774	0.32275096990602	CAPG	1
GOBP_REGULATION_OF_PROTEIN_GLYCOSYLATION	GOBP_REGULATION_OF_PROTEIN_GLYCOSYLATION	GOBP_REGULATION_OF_PROTEIN_GLYCOSYLATION	1/171	15/17872	0.134344620466424	0.379957355353774	0.32275096990602	TMEM59	1
GOBP_REGULATION_OF_UNSATURATED_FATTY_ACID_BIOSYNTHETIC_PROCESS	GOBP_REGULATION_OF_UNSATURATED_FATTY_ACID_BIOSYNTHETIC_PROCESS	GOBP_REGULATION_OF_UNSATURATED_FATTY_ACID_BIOSYNTHETIC_PROCESS	1/171	15/17872	0.134344620466424	0.379957355353774	0.32275096990602	FABP5	1
GOBP_RENAL_SYSTEM_PROCESS_INVOLVED_IN_REGULATION_OF_BLOOD_VOLUME	GOBP_RENAL_SYSTEM_PROCESS_INVOLVED_IN_REGULATION_OF_BLOOD_VOLUME	GOBP_RENAL_SYSTEM_PROCESS_INVOLVED_IN_REGULATION_OF_BLOOD_VOLUME	1/171	15/17872	0.134344620466424	0.379957355353774	0.32275096990602	CYBA	1
GOBP_SNARE_COMPLEX_ASSEMBLY	GOBP_SNARE_COMPLEX_ASSEMBLY	GOBP_SNARE_COMPLEX_ASSEMBLY	1/171	15/17872	0.134344620466424	0.379957355353774	0.32275096990602	VAMP8	1
GOBP_TRANSFORMING_GROWTH_FACTOR_BETA1_PRODUCTION	GOBP_TRANSFORMING_GROWTH_FACTOR_BETA1_PRODUCTION	GOBP_TRANSFORMING_GROWTH_FACTOR_BETA1_PRODUCTION	1/171	15/17872	0.134344620466424	0.379957355353774	0.32275096990602	TYROBP	1
GOBP_POSITIVE_REGULATION_OF_INSULIN_SECRETION	GOBP_POSITIVE_REGULATION_OF_INSULIN_SECRETION	GOBP_POSITIVE_REGULATION_OF_INSULIN_SECRETION	2/171	67/17872	0.13477495263465	0.380162017790169	0.322924818362746	HIF1A/SERP1	2
GOBP_POSITIVE_REGULATION_OF_NIK_NF_KAPPAB_SIGNALING	GOBP_POSITIVE_REGULATION_OF_NIK_NF_KAPPAB_SIGNALING	GOBP_POSITIVE_REGULATION_OF_NIK_NF_KAPPAB_SIGNALING	2/171	67/17872	0.13477495263465	0.380162017790169	0.322924818362746	RPS3/CD14	2
GOBP_MAMMARY_GLAND_EPITHELIUM_DEVELOPMENT	GOBP_MAMMARY_GLAND_EPITHELIUM_DEVELOPMENT	GOBP_MAMMARY_GLAND_EPITHELIUM_DEVELOPMENT	2/171	68/17872	0.138028321909898	0.387793856794476	0.329407607565533	GPX1/HIF1A	2
GOBP_REGULATION_OF_CELL_SUBSTRATE_JUNCTION_ORGANIZATION	GOBP_REGULATION_OF_CELL_SUBSTRATE_JUNCTION_ORGANIZATION	GOBP_REGULATION_OF_CELL_SUBSTRATE_JUNCTION_ORGANIZATION	2/171	68/17872	0.138028321909898	0.387793856794476	0.329407607565533	LAMTOR2/ACTG1	2
GOBP_REGULATION_OF_PROTEIN_MATURATION	GOBP_REGULATION_OF_PROTEIN_MATURATION	GOBP_REGULATION_OF_PROTEIN_MATURATION	2/171	68/17872	0.138028321909898	0.387793856794476	0.329407607565533	TMEM59/CARD16	2
GOBP_EPITHELIAL_CELL_DEVELOPMENT	GOBP_EPITHELIAL_CELL_DEVELOPMENT	GOBP_EPITHELIAL_CELL_DEVELOPMENT	4/171	208/17872	0.139152573374977	0.387906589666428	0.329503367374495	GPX1/HIF1A/FNDC3A/EZR	4
GOBP_POSITIVE_REGULATION_OF_PROTEOLYSIS_INVOLVED_IN_CELLULAR_PROTEIN_CATABOLIC_PROCESS	GOBP_POSITIVE_REGULATION_OF_PROTEOLYSIS_INVOLVED_IN_CELLULAR_PROTEIN_CATABOLIC_PROCESS	GOBP_POSITIVE_REGULATION_OF_PROTEOLYSIS_INVOLVED_IN_CELLULAR_PROTEIN_CATABOLIC_PROCESS	3/171	135/17872	0.13956554613589	0.387906589666428	0.329503367374495	RACK1/GABARAP/ELOB	3
GOBP_ENDOTHELIAL_CELL_DEVELOPMENT	GOBP_ENDOTHELIAL_CELL_DEVELOPMENT	GOBP_ENDOTHELIAL_CELL_DEVELOPMENT	2/171	69/17872	0.141298906222238	0.387906589666428	0.329503367374495	GPX1/EZR	2
GOBP_MAST_CELL_ACTIVATION	GOBP_MAST_CELL_ACTIVATION	GOBP_MAST_CELL_ACTIVATION	2/171	69/17872	0.141298906222238	0.387906589666428	0.329503367374495	VAMP8/STXBP2	2
GOBP_POSITIVE_REGULATION_OF_CYTOKINE_PRODUCTION_INVOLVED_IN_IMMUNE_RESPONSE	GOBP_POSITIVE_REGULATION_OF_CYTOKINE_PRODUCTION_INVOLVED_IN_IMMUNE_RESPONSE	GOBP_POSITIVE_REGULATION_OF_CYTOKINE_PRODUCTION_INVOLVED_IN_IMMUNE_RESPONSE	2/171	69/17872	0.141298906222238	0.387906589666428	0.329503367374495	CD36/MALT1	2
GOBP_TISSUE_MIGRATION	GOBP_TISSUE_MIGRATION	GOBP_TISSUE_MIGRATION	6/171	368/17872	0.14215232815086	0.387906589666428	0.329503367374495	TMSB4X/GPX1/HIF1A/PFN1/GRN/APOE	6
GOBP_ACTIN_MYOSIN_FILAMENT_SLIDING	GOBP_ACTIN_MYOSIN_FILAMENT_SLIDING	GOBP_ACTIN_MYOSIN_FILAMENT_SLIDING	1/171	16/17872	0.142634202697495	0.387906589666428	0.329503367374495	MYL6	1
GOBP_ATP_TRANSPORT	GOBP_ATP_TRANSPORT	GOBP_ATP_TRANSPORT	1/171	16/17872	0.142634202697495	0.387906589666428	0.329503367374495	SLC25A6	1
GOBP_BEHAVIORAL_RESPONSE_TO_PAIN	GOBP_BEHAVIORAL_RESPONSE_TO_PAIN	GOBP_BEHAVIORAL_RESPONSE_TO_PAIN	1/171	16/17872	0.142634202697495	0.387906589666428	0.329503367374495	TSPO	1
GOBP_LACTATE_METABOLIC_PROCESS	GOBP_LACTATE_METABOLIC_PROCESS	GOBP_LACTATE_METABOLIC_PROCESS	1/171	16/17872	0.142634202697495	0.387906589666428	0.329503367374495	HIF1A	1
GOBP_LOCOMOTORY_EXPLORATION_BEHAVIOR	GOBP_LOCOMOTORY_EXPLORATION_BEHAVIOR	GOBP_LOCOMOTORY_EXPLORATION_BEHAVIOR	1/171	16/17872	0.142634202697495	0.387906589666428	0.329503367374495	APOE	1
GOBP_LOW_DENSITY_LIPOPROTEIN_PARTICLE_REMODELING	GOBP_LOW_DENSITY_LIPOPROTEIN_PARTICLE_REMODELING	GOBP_LOW_DENSITY_LIPOPROTEIN_PARTICLE_REMODELING	1/171	16/17872	0.142634202697495	0.387906589666428	0.329503367374495	APOE	1
GOBP_NEGATIVE_REGULATION_OF_ALCOHOL_BIOSYNTHETIC_PROCESS	GOBP_NEGATIVE_REGULATION_OF_ALCOHOL_BIOSYNTHETIC_PROCESS	GOBP_NEGATIVE_REGULATION_OF_ALCOHOL_BIOSYNTHETIC_PROCESS	1/171	16/17872	0.142634202697495	0.387906589666428	0.329503367374495	APOE	1
GOBP_NEGATIVE_REGULATION_OF_JUN_KINASE_ACTIVITY	GOBP_NEGATIVE_REGULATION_OF_JUN_KINASE_ACTIVITY	GOBP_NEGATIVE_REGULATION_OF_JUN_KINASE_ACTIVITY	1/171	16/17872	0.142634202697495	0.387906589666428	0.329503367374495	GSTP1	1
GOBP_NEUROTRANSMITTER_RECEPTOR_TRANSPORT_TO_PLASMA_MEMBRANE	GOBP_NEUROTRANSMITTER_RECEPTOR_TRANSPORT_TO_PLASMA_MEMBRANE	GOBP_NEUROTRANSMITTER_RECEPTOR_TRANSPORT_TO_PLASMA_MEMBRANE	1/171	16/17872	0.142634202697495	0.387906589666428	0.329503367374495	STX3	1
GOBP_OPSONIZATION	GOBP_OPSONIZATION	GOBP_OPSONIZATION	1/171	16/17872	0.142634202697495	0.387906589666428	0.329503367374495	FCN1	1
GOBP_PHOSPHATIDYLCHOLINE_CATABOLIC_PROCESS	GOBP_PHOSPHATIDYLCHOLINE_CATABOLIC_PROCESS	GOBP_PHOSPHATIDYLCHOLINE_CATABOLIC_PROCESS	1/171	16/17872	0.142634202697495	0.387906589666428	0.329503367374495	APOC1	1
GOBP_POSITIVE_REGULATION_OF_MEMBRANE_PROTEIN_ECTODOMAIN_PROTEOLYSIS	GOBP_POSITIVE_REGULATION_OF_MEMBRANE_PROTEIN_ECTODOMAIN_PROTEOLYSIS	GOBP_POSITIVE_REGULATION_OF_MEMBRANE_PROTEIN_ECTODOMAIN_PROTEOLYSIS	1/171	16/17872	0.142634202697495	0.387906589666428	0.329503367374495	APOE	1
GOBP_POSITIVE_REGULATION_OF_T_CELL_RECEPTOR_SIGNALING_PATHWAY	GOBP_POSITIVE_REGULATION_OF_T_CELL_RECEPTOR_SIGNALING_PATHWAY	GOBP_POSITIVE_REGULATION_OF_T_CELL_RECEPTOR_SIGNALING_PATHWAY	1/171	16/17872	0.142634202697495	0.387906589666428	0.329503367374495	RPS3	1
GOBP_PROTEIN_MATURATION_BY_IRON_SULFUR_CLUSTER_TRANSFER	GOBP_PROTEIN_MATURATION_BY_IRON_SULFUR_CLUSTER_TRANSFER	GOBP_PROTEIN_MATURATION_BY_IRON_SULFUR_CLUSTER_TRANSFER	1/171	16/17872	0.142634202697495	0.387906589666428	0.329503367374495	CIAO2B	1
GOBP_REGULATION_OF_EXTRACELLULAR_MATRIX_DISASSEMBLY	GOBP_REGULATION_OF_EXTRACELLULAR_MATRIX_DISASSEMBLY	GOBP_REGULATION_OF_EXTRACELLULAR_MATRIX_DISASSEMBLY	1/171	16/17872	0.142634202697495	0.387906589666428	0.329503367374495	CST3	1
GOBP_REGULATION_OF_INTEGRIN_MEDIATED_SIGNALING_PATHWAY	GOBP_REGULATION_OF_INTEGRIN_MEDIATED_SIGNALING_PATHWAY	GOBP_REGULATION_OF_INTEGRIN_MEDIATED_SIGNALING_PATHWAY	1/171	16/17872	0.142634202697495	0.387906589666428	0.329503367374495	CD63	1
GOBP_REGULATION_OF_RRNA_PROCESSING	GOBP_REGULATION_OF_RRNA_PROCESSING	GOBP_REGULATION_OF_RRNA_PROCESSING	1/171	16/17872	0.142634202697495	0.387906589666428	0.329503367374495	USP36	1
GOBP_SPHINGOLIPID_MEDIATED_SIGNALING_PATHWAY	GOBP_SPHINGOLIPID_MEDIATED_SIGNALING_PATHWAY	GOBP_SPHINGOLIPID_MEDIATED_SIGNALING_PATHWAY	1/171	16/17872	0.142634202697495	0.387906589666428	0.329503367374495	EZR	1
GOBP_THYMOCYTE_APOPTOTIC_PROCESS	GOBP_THYMOCYTE_APOPTOTIC_PROCESS	GOBP_THYMOCYTE_APOPTOTIC_PROCESS	1/171	16/17872	0.142634202697495	0.387906589666428	0.329503367374495	HIF1A	1
GOBP_NEGATIVE_REGULATION_OF_HYDROLASE_ACTIVITY	GOBP_NEGATIVE_REGULATION_OF_HYDROLASE_ACTIVITY	GOBP_NEGATIVE_REGULATION_OF_HYDROLASE_ACTIVITY	6/171	369/17872	0.14343226180219	0.389578163769631	0.330923269254211	GPX1/APOC1/CSTB/CST3/SLC27A4/CARD16	6
GOBP_MEMBRANE_INVAGINATION	GOBP_MEMBRANE_INVAGINATION	GOBP_MEMBRANE_INVAGINATION	3/171	137/17872	0.143989547645118	0.390148860724689	0.331408042066665	AIF1/ITGB2/CD36	3
GOBP_CELL_CELL_RECOGNITION	GOBP_CELL_CELL_RECOGNITION	GOBP_CELL_CELL_RECOGNITION	2/171	70/17872	0.144586083845724	0.390148860724689	0.331408042066665	ALDOA/CD9	2
GOBP_MONOCYTE_CHEMOTAXIS	GOBP_MONOCYTE_CHEMOTAXIS	GOBP_MONOCYTE_CHEMOTAXIS	2/171	70/17872	0.144586083845724	0.390148860724689	0.331408042066665	AIF1/RPS19	2
GOBP_RESPIRATORY_GASEOUS_EXCHANGE_BY_RESPIRATORY_SYSTEM	GOBP_RESPIRATORY_GASEOUS_EXCHANGE_BY_RESPIRATORY_SYSTEM	GOBP_RESPIRATORY_GASEOUS_EXCHANGE_BY_RESPIRATORY_SYSTEM	2/171	70/17872	0.144586083845724	0.390148860724689	0.331408042066665	COX5B/SFTPC	2
GOBP_RNA_DEPENDENT_DNA_BIOSYNTHETIC_PROCESS	GOBP_RNA_DEPENDENT_DNA_BIOSYNTHETIC_PROCESS	GOBP_RNA_DEPENDENT_DNA_BIOSYNTHETIC_PROCESS	2/171	70/17872	0.144586083845724	0.390148860724689	0.331408042066665	NOP10/HSP90AA1	2
GOBP_SIGNAL_RELEASE	GOBP_SIGNAL_RELEASE	GOBP_SIGNAL_RELEASE	7/171	453/17872	0.144744492585242	0.390148860724689	0.331408042066665	VAMP8/HIF1A/STXBP2/PPT1/STX3/SELENOT/SERP1	7
GOBP_ENDOTHELIUM_DEVELOPMENT	GOBP_ENDOTHELIUM_DEVELOPMENT	GOBP_ENDOTHELIUM_DEVELOPMENT	3/171	138/17872	0.146218944225792	0.393623621718101	0.334359642989803	GPX1/EZR/EDF1	3
GOBP_GLIOGENESIS	GOBP_GLIOGENESIS	GOBP_GLIOGENESIS	5/171	291/17872	0.147415427221819	0.395523806628286	0.335973736029777	TSPO/GRN/S100A9/S100A8/CD9	5
GOBP_REGULATION_OF_EPITHELIAL_CELL_MIGRATION	GOBP_REGULATION_OF_EPITHELIAL_CELL_MIGRATION	GOBP_REGULATION_OF_EPITHELIAL_CELL_MIGRATION	5/171	291/17872	0.147415427221819	0.395523806628286	0.335973736029777	TMSB4X/HIF1A/PFN1/GRN/APOE	5
GOBP_REGULATION_OF_MITOCHONDRIAL_MEMBRANE_POTENTIAL	GOBP_REGULATION_OF_MITOCHONDRIAL_MEMBRANE_POTENTIAL	GOBP_REGULATION_OF_MITOCHONDRIAL_MEMBRANE_POTENTIAL	2/171	71/17872	0.147889243246837	0.395523806628286	0.335973736029777	TSPO/RACK1	2
GOBP_POSITIVE_REGULATION_OF_LEUKOCYTE_MEDIATED_IMMUNITY	GOBP_POSITIVE_REGULATION_OF_LEUKOCYTE_MEDIATED_IMMUNITY	GOBP_POSITIVE_REGULATION_OF_LEUKOCYTE_MEDIATED_IMMUNITY	3/171	139/17872	0.14845969565972	0.395523806628286	0.335973736029777	TYROBP/ITGB2/MALT1	3
GOBP_POSITIVE_REGULATION_OF_PROTEIN_MODIFICATION_BY_SMALL_PROTEIN_CONJUGATION_OR_REMOVAL	GOBP_POSITIVE_REGULATION_OF_PROTEIN_MODIFICATION_BY_SMALL_PROTEIN_CONJUGATION_OR_REMOVAL	GOBP_POSITIVE_REGULATION_OF_PROTEIN_MODIFICATION_BY_SMALL_PROTEIN_CONJUGATION_OR_REMOVAL	3/171	139/17872	0.14845969565972	0.395523806628286	0.335973736029777	RPS2/GABARAP/MALT1	3
GOBP_RHO_PROTEIN_SIGNAL_TRANSDUCTION	GOBP_RHO_PROTEIN_SIGNAL_TRANSDUCTION	GOBP_RHO_PROTEIN_SIGNAL_TRANSDUCTION	3/171	139/17872	0.14845969565972	0.395523806628286	0.335973736029777	APOE/ARHGDIB/CFL1	3
GOBP_REGULATION_OF_REGULATED_SECRETORY_PATHWAY	GOBP_REGULATION_OF_REGULATED_SECRETORY_PATHWAY	GOBP_REGULATION_OF_REGULATED_SECRETORY_PATHWAY	3/171	140/17872	0.150711620316763	0.395523806628286	0.335973736029777	VAMP8/ITGB2/STXBP2	3
GOBP_RESPONSE_TO_INTERLEUKIN_1	GOBP_RESPONSE_TO_INTERLEUKIN_1	GOBP_RESPONSE_TO_INTERLEUKIN_1	3/171	140/17872	0.150711620316763	0.395523806628286	0.335973736029777	CYBA/HIF1A/PYCARD	3
GOBP_VESICLE_MEDIATED_TRANSPORT_TO_THE_PLASMA_MEMBRANE	GOBP_VESICLE_MEDIATED_TRANSPORT_TO_THE_PLASMA_MEMBRANE	GOBP_VESICLE_MEDIATED_TRANSPORT_TO_THE_PLASMA_MEMBRANE	3/171	140/17872	0.150711620316763	0.395523806628286	0.335973736029777	RACK1/ARL4C/STX3	3
GOBP_FATTY_ACID_HOMEOSTASIS	GOBP_FATTY_ACID_HOMEOSTASIS	GOBP_FATTY_ACID_HOMEOSTASIS	1/171	17/17872	0.150844863054727	0.395523806628286	0.335973736029777	APOE	1
GOBP_HEMOGLOBIN_METABOLIC_PROCESS	GOBP_HEMOGLOBIN_METABOLIC_PROCESS	GOBP_HEMOGLOBIN_METABOLIC_PROCESS	1/171	17/17872	0.150844863054727	0.395523806628286	0.335973736029777	HIF1A	1
GOBP_MACROPHAGE_CYTOKINE_PRODUCTION	GOBP_MACROPHAGE_CYTOKINE_PRODUCTION	GOBP_MACROPHAGE_CYTOKINE_PRODUCTION	1/171	17/17872	0.150844863054727	0.395523806628286	0.335973736029777	CD36	1
GOBP_NEGATIVE_REGULATION_OF_LIPASE_ACTIVITY	GOBP_NEGATIVE_REGULATION_OF_LIPASE_ACTIVITY	GOBP_NEGATIVE_REGULATION_OF_LIPASE_ACTIVITY	1/171	17/17872	0.150844863054727	0.395523806628286	0.335973736029777	APOC1	1
GOBP_NEGATIVE_REGULATION_OF_NITRIC_OXIDE_METABOLIC_PROCESS	GOBP_NEGATIVE_REGULATION_OF_NITRIC_OXIDE_METABOLIC_PROCESS	GOBP_NEGATIVE_REGULATION_OF_NITRIC_OXIDE_METABOLIC_PROCESS	1/171	17/17872	0.150844863054727	0.395523806628286	0.335973736029777	TSPO	1
GOBP_POSITIVE_REGULATION_OF_GLIAL_CELL_PROLIFERATION	GOBP_POSITIVE_REGULATION_OF_GLIAL_CELL_PROLIFERATION	GOBP_POSITIVE_REGULATION_OF_GLIAL_CELL_PROLIFERATION	1/171	17/17872	0.150844863054727	0.395523806628286	0.335973736029777	TSPO	1
GOBP_POSITIVE_REGULATION_OF_PROTEIN_POLYUBIQUITINATION	GOBP_POSITIVE_REGULATION_OF_PROTEIN_POLYUBIQUITINATION	GOBP_POSITIVE_REGULATION_OF_PROTEIN_POLYUBIQUITINATION	1/171	17/17872	0.150844863054727	0.395523806628286	0.335973736029777	GABARAP	1
GOBP_POSITIVE_REGULATION_OF_VASCULAR_ENDOTHELIAL_GROWTH_FACTOR_RECEPTOR_SIGNALING_PATHWAY	GOBP_POSITIVE_REGULATION_OF_VASCULAR_ENDOTHELIAL_GROWTH_FACTOR_RECEPTOR_SIGNALING_PATHWAY	GOBP_POSITIVE_REGULATION_OF_VASCULAR_ENDOTHELIAL_GROWTH_FACTOR_RECEPTOR_SIGNALING_PATHWAY	1/171	17/17872	0.150844863054727	0.395523806628286	0.335973736029777	HIF1A	1
GOBP_POSITIVE_REGULATION_OF_VASCULAR_PERMEABILITY	GOBP_POSITIVE_REGULATION_OF_VASCULAR_PERMEABILITY	GOBP_POSITIVE_REGULATION_OF_VASCULAR_PERMEABILITY	1/171	17/17872	0.150844863054727	0.395523806628286	0.335973736029777	APOE	1
GOBP_REGULATION_OF_GASTRULATION	GOBP_REGULATION_OF_GASTRULATION	GOBP_REGULATION_OF_GASTRULATION	1/171	17/17872	0.150844863054727	0.395523806628286	0.335973736029777	RACK1	1
GOBP_REGULATION_OF_T_CELL_CHEMOTAXIS	GOBP_REGULATION_OF_T_CELL_CHEMOTAXIS	GOBP_REGULATION_OF_T_CELL_CHEMOTAXIS	1/171	17/17872	0.150844863054727	0.395523806628286	0.335973736029777	OXSR1	1
GOBP_TROPHOBLAST_CELL_MIGRATION	GOBP_TROPHOBLAST_CELL_MIGRATION	GOBP_TROPHOBLAST_CELL_MIGRATION	1/171	17/17872	0.150844863054727	0.395523806628286	0.335973736029777	ARHGDIB	1
GOBP_POSITIVE_REGULATION_OF_MITOCHONDRION_ORGANIZATION	GOBP_POSITIVE_REGULATION_OF_MITOCHONDRION_ORGANIZATION	GOBP_POSITIVE_REGULATION_OF_MITOCHONDRION_ORGANIZATION	2/171	72/17872	0.15120778294829	0.395523806628286	0.335973736029777	HIF1A/PYCARD	2
GOBP_TISSUE_REGENERATION	GOBP_TISSUE_REGENERATION	GOBP_TISSUE_REGENERATION	2/171	72/17872	0.15120778294829	0.395523806628286	0.335973736029777	GPX1/CD9	2
GOBP_REGULATION_OF_PROTEIN_SERINE_THREONINE_KINASE_ACTIVITY	GOBP_REGULATION_OF_PROTEIN_SERINE_THREONINE_KINASE_ACTIVITY	GOBP_REGULATION_OF_PROTEIN_SERINE_THREONINE_KINASE_ACTIVITY	6/171	376/17872	0.152540106716557	0.398518064779786	0.338517178626501	ACTB/RPS3/APOE/PYCARD/GSTP1/FAM20A	6
GOBP_POSITIVE_REGULATION_OF_LEUKOCYTE_MIGRATION	GOBP_POSITIVE_REGULATION_OF_LEUKOCYTE_MIGRATION	GOBP_POSITIVE_REGULATION_OF_LEUKOCYTE_MIGRATION	3/171	141/17872	0.152974536723799	0.398672289572208	0.33864818333173	AIF1/PYCARD/OXSR1	3
GOBP_POSITIVE_REGULATION_OF_TRANSLATION	GOBP_POSITIVE_REGULATION_OF_TRANSLATION	GOBP_POSITIVE_REGULATION_OF_TRANSLATION	3/171	141/17872	0.152974536723799	0.398672289572208	0.33864818333173	RPS9/YBX1/SERP1	3
GOBP_NEGATIVE_REGULATION_OF_INNATE_IMMUNE_RESPONSE	GOBP_NEGATIVE_REGULATION_OF_INNATE_IMMUNE_RESPONSE	GOBP_NEGATIVE_REGULATION_OF_INNATE_IMMUNE_RESPONSE	2/171	73/17872	0.154541111394481	0.399606968412129	0.339442136910689	GRN/RPS19	2
GOBP_NEGATIVE_REGULATION_OF_SMOOTH_MUSCLE_CELL_PROLIFERATION	GOBP_NEGATIVE_REGULATION_OF_SMOOTH_MUSCLE_CELL_PROLIFERATION	GOBP_NEGATIVE_REGULATION_OF_SMOOTH_MUSCLE_CELL_PROLIFERATION	2/171	73/17872	0.154541111394481	0.399606968412129	0.339442136910689	AIF1/APOE	2
GOBP_REGULATION_OF_STEROID_BIOSYNTHETIC_PROCESS	GOBP_REGULATION_OF_STEROID_BIOSYNTHETIC_PROCESS	GOBP_REGULATION_OF_STEROID_BIOSYNTHETIC_PROCESS	2/171	73/17872	0.154541111394481	0.399606968412129	0.339442136910689	TSPO/APOE	2
GOBP_SYNAPTIC_VESICLE_RECYCLING	GOBP_SYNAPTIC_VESICLE_RECYCLING	GOBP_SYNAPTIC_VESICLE_RECYCLING	2/171	73/17872	0.154541111394481	0.399606968412129	0.339442136910689	ACTB/ACTG1	2
GOBP_NEGATIVE_REGULATION_OF_TRANSMEMBRANE_TRANSPORT	GOBP_NEGATIVE_REGULATION_OF_TRANSMEMBRANE_TRANSPORT	GOBP_NEGATIVE_REGULATION_OF_TRANSMEMBRANE_TRANSPORT	3/171	142/17872	0.155248263599261	0.399606968412129	0.339442136910689	OAZ1/FABP5/OXSR1	3
GOBP_SMALL_MOLECULE_CATABOLIC_PROCESS	GOBP_SMALL_MOLECULE_CATABOLIC_PROCESS	GOBP_SMALL_MOLECULE_CATABOLIC_PROCESS	6/171	380/17872	0.157858727594096	0.399606968412129	0.339442136910689	DDAH2/APOE/NPL/SLC27A4/INPP5A/TPI1	6
GOBP_LYTIC_VACUOLE_ORGANIZATION	GOBP_LYTIC_VACUOLE_ORGANIZATION	GOBP_LYTIC_VACUOLE_ORGANIZATION	2/171	74/17872	0.157888646818571	0.399606968412129	0.339442136910689	GRN/PPT1	2
GOBP_MULTICELLULAR_ORGANISMAL_RESPONSE_TO_STRESS	GOBP_MULTICELLULAR_ORGANISMAL_RESPONSE_TO_STRESS	GOBP_MULTICELLULAR_ORGANISMAL_RESPONSE_TO_STRESS	2/171	74/17872	0.157888646818571	0.399606968412129	0.339442136910689	TSPO/APOE	2
GOBP_MYELOID_CELL_DEVELOPMENT	GOBP_MYELOID_CELL_DEVELOPMENT	GOBP_MYELOID_CELL_DEVELOPMENT	2/171	74/17872	0.157888646818571	0.399606968412129	0.339442136910689	TYROBP/RPS6	2
GOBP_REGULATION_OF_DEFENSE_RESPONSE_TO_VIRUS	GOBP_REGULATION_OF_DEFENSE_RESPONSE_TO_VIRUS	GOBP_REGULATION_OF_DEFENSE_RESPONSE_TO_VIRUS	2/171	74/17872	0.157888646818571	0.399606968412129	0.339442136910689	PYCARD/HSP90AA1	2
GOBP_REGULATION_OF_LEUKOCYTE_MIGRATION	GOBP_REGULATION_OF_LEUKOCYTE_MIGRATION	GOBP_REGULATION_OF_LEUKOCYTE_MIGRATION	4/171	219/17872	0.158595090590537	0.399606968412129	0.339442136910689	AIF1/PYCARD/OXSR1/CD9	4
GOBP_ACTIVATION_OF_NF_KAPPAB_INDUCING_KINASE_ACTIVITY	GOBP_ACTIVATION_OF_NF_KAPPAB_INDUCING_KINASE_ACTIVITY	GOBP_ACTIVATION_OF_NF_KAPPAB_INDUCING_KINASE_ACTIVITY	1/171	18/17872	0.158977348544373	0.399606968412129	0.339442136910689	MALT1	1
GOBP_AXONAL_TRANSPORT_OF_MITOCHONDRION	GOBP_AXONAL_TRANSPORT_OF_MITOCHONDRION	GOBP_AXONAL_TRANSPORT_OF_MITOCHONDRION	1/171	18/17872	0.158977348544373	0.399606968412129	0.339442136910689	HIF1A	1
GOBP_CATECHOLAMINE_UPTAKE	GOBP_CATECHOLAMINE_UPTAKE	GOBP_CATECHOLAMINE_UPTAKE	1/171	18/17872	0.158977348544373	0.399606968412129	0.339442136910689	ACTB	1
GOBP_CLATHRIN_COAT_ASSEMBLY	GOBP_CLATHRIN_COAT_ASSEMBLY	GOBP_CLATHRIN_COAT_ASSEMBLY	1/171	18/17872	0.158977348544373	0.399606968412129	0.339442136910689	AP2S1	1
GOBP_COMPLEMENT_ACTIVATION_ALTERNATIVE_PATHWAY	GOBP_COMPLEMENT_ACTIVATION_ALTERNATIVE_PATHWAY	GOBP_COMPLEMENT_ACTIVATION_ALTERNATIVE_PATHWAY	1/171	18/17872	0.158977348544373	0.399606968412129	0.339442136910689	CFD	1
GOBP_FATTY_ACID_TRANSMEMBRANE_TRANSPORT	GOBP_FATTY_ACID_TRANSMEMBRANE_TRANSPORT	GOBP_FATTY_ACID_TRANSMEMBRANE_TRANSPORT	1/171	18/17872	0.158977348544373	0.399606968412129	0.339442136910689	CD36	1
GOBP_GROOMING_BEHAVIOR	GOBP_GROOMING_BEHAVIOR	GOBP_GROOMING_BEHAVIOR	1/171	18/17872	0.158977348544373	0.399606968412129	0.339442136910689	PPT1	1
GOBP_HYDROGEN_PEROXIDE_BIOSYNTHETIC_PROCESS	GOBP_HYDROGEN_PEROXIDE_BIOSYNTHETIC_PROCESS	GOBP_HYDROGEN_PEROXIDE_BIOSYNTHETIC_PROCESS	1/171	18/17872	0.158977348544373	0.399606968412129	0.339442136910689	CYBA	1
GOBP_MAMMARY_GLAND_EPITHELIAL_CELL_DIFFERENTIATION	GOBP_MAMMARY_GLAND_EPITHELIAL_CELL_DIFFERENTIATION	GOBP_MAMMARY_GLAND_EPITHELIAL_CELL_DIFFERENTIATION	1/171	18/17872	0.158977348544373	0.399606968412129	0.339442136910689	HIF1A	1
GOBP_NEGATIVE_REGULATION_OF_NEUROINFLAMMATORY_RESPONSE	GOBP_NEGATIVE_REGULATION_OF_NEUROINFLAMMATORY_RESPONSE	GOBP_NEGATIVE_REGULATION_OF_NEUROINFLAMMATORY_RESPONSE	1/171	18/17872	0.158977348544373	0.399606968412129	0.339442136910689	GRN	1
GOBP_OSTEOCLAST_DEVELOPMENT	GOBP_OSTEOCLAST_DEVELOPMENT	GOBP_OSTEOCLAST_DEVELOPMENT	1/171	18/17872	0.158977348544373	0.399606968412129	0.339442136910689	TYROBP	1
GOBP_POSITIVE_REGULATION_OF_NECROTIC_CELL_DEATH	GOBP_POSITIVE_REGULATION_OF_NECROTIC_CELL_DEATH	GOBP_POSITIVE_REGULATION_OF_NECROTIC_CELL_DEATH	1/171	18/17872	0.158977348544373	0.399606968412129	0.339442136910689	TSPO	1
GOBP_PSEUDOURIDINE_SYNTHESIS	GOBP_PSEUDOURIDINE_SYNTHESIS	GOBP_PSEUDOURIDINE_SYNTHESIS	1/171	18/17872	0.158977348544373	0.399606968412129	0.339442136910689	NOP10	1
GOBP_REGULATION_OF_EARLY_ENDOSOME_TO_LATE_ENDOSOME_TRANSPORT	GOBP_REGULATION_OF_EARLY_ENDOSOME_TO_LATE_ENDOSOME_TRANSPORT	GOBP_REGULATION_OF_EARLY_ENDOSOME_TO_LATE_ENDOSOME_TRANSPORT	1/171	18/17872	0.158977348544373	0.399606968412129	0.339442136910689	EZR	1
GOBP_REGULATION_OF_LIPOPROTEIN_METABOLIC_PROCESS	GOBP_REGULATION_OF_LIPOPROTEIN_METABOLIC_PROCESS	GOBP_REGULATION_OF_LIPOPROTEIN_METABOLIC_PROCESS	1/171	18/17872	0.158977348544373	0.399606968412129	0.339442136910689	DBI	1
GOBP_REGULATION_OF_RECEPTOR_LOCALIZATION_TO_SYNAPSE	GOBP_REGULATION_OF_RECEPTOR_LOCALIZATION_TO_SYNAPSE	GOBP_REGULATION_OF_RECEPTOR_LOCALIZATION_TO_SYNAPSE	1/171	18/17872	0.158977348544373	0.399606968412129	0.339442136910689	TYROBP	1
GOBP_REGULATION_OF_T_HELPER_17_CELL_DIFFERENTIATION	GOBP_REGULATION_OF_T_HELPER_17_CELL_DIFFERENTIATION	GOBP_REGULATION_OF_T_HELPER_17_CELL_DIFFERENTIATION	1/171	18/17872	0.158977348544373	0.399606968412129	0.339442136910689	MALT1	1
GOBP_SERTOLI_CELL_DIFFERENTIATION	GOBP_SERTOLI_CELL_DIFFERENTIATION	GOBP_SERTOLI_CELL_DIFFERENTIATION	1/171	18/17872	0.158977348544373	0.399606968412129	0.339442136910689	FNDC3A	1
GOBP_TOLL_LIKE_RECEPTOR_2_SIGNALING_PATHWAY	GOBP_TOLL_LIKE_RECEPTOR_2_SIGNALING_PATHWAY	GOBP_TOLL_LIKE_RECEPTOR_2_SIGNALING_PATHWAY	1/171	18/17872	0.158977348544373	0.399606968412129	0.339442136910689	CYBA	1
GOBP_CYTOKINE_PRODUCTION_INVOLVED_IN_INFLAMMATORY_RESPONSE	GOBP_CYTOKINE_PRODUCTION_INVOLVED_IN_INFLAMMATORY_RESPONSE	GOBP_CYTOKINE_PRODUCTION_INVOLVED_IN_INFLAMMATORY_RESPONSE	2/171	75/17872	0.16124981711118	0.403409436447759	0.342672105298572	HIF1A/PYCARD	2
GOBP_ENDOPLASMIC_RETICULUM_UNFOLDED_PROTEIN_RESPONSE	GOBP_ENDOPLASMIC_RETICULUM_UNFOLDED_PROTEIN_RESPONSE	GOBP_ENDOPLASMIC_RETICULUM_UNFOLDED_PROTEIN_RESPONSE	2/171	75/17872	0.16124981711118	0.403409436447759	0.342672105298572	RACK1/SERP1	2
GOBP_LYMPHOCYTE_APOPTOTIC_PROCESS	GOBP_LYMPHOCYTE_APOPTOTIC_PROCESS	GOBP_LYMPHOCYTE_APOPTOTIC_PROCESS	2/171	75/17872	0.16124981711118	0.403409436447759	0.342672105298572	HIF1A/RPS6	2
GOBP_PROTEIN_LOCALIZATION_TO_ENDOPLASMIC_RETICULUM	GOBP_PROTEIN_LOCALIZATION_TO_ENDOPLASMIC_RETICULUM	GOBP_PROTEIN_LOCALIZATION_TO_ENDOPLASMIC_RETICULUM	2/171	75/17872	0.16124981711118	0.403409436447759	0.342672105298572	SRP14/SEC62	2
GOBP_ESTABLISHMENT_OF_CELL_POLARITY	GOBP_ESTABLISHMENT_OF_CELL_POLARITY	GOBP_ESTABLISHMENT_OF_CELL_POLARITY	3/171	145/17872	0.162132497794968	0.404443211060111	0.343550234788894	RACK1/HSP90AA1/EZR	3
GOBP_ESTABLISHMENT_OR_MAINTENANCE_OF_CELL_POLARITY	GOBP_ESTABLISHMENT_OR_MAINTENANCE_OF_CELL_POLARITY	GOBP_ESTABLISHMENT_OR_MAINTENANCE_OF_CELL_POLARITY	4/171	221/17872	0.162234282402643	0.404443211060111	0.343550234788894	ACTB/RACK1/HSP90AA1/EZR	4
GOBP_EXTRINSIC_APOPTOTIC_SIGNALING_PATHWAY	GOBP_EXTRINSIC_APOPTOTIC_SIGNALING_PATHWAY	GOBP_EXTRINSIC_APOPTOTIC_SIGNALING_PATHWAY	4/171	221/17872	0.162234282402643	0.404443211060111	0.343550234788894	GPX1/PYCARD/GABARAP/GSTP1	4
GOBP_CELL_RECOGNITION	GOBP_CELL_RECOGNITION	GOBP_CELL_RECOGNITION	4/171	222/17872	0.164065325547052	0.405923130184262	0.344807337266243	FCN1/CD36/ALDOA/CD9	4
GOBP_NEUROTRANSMITTER_SECRETION	GOBP_NEUROTRANSMITTER_SECRETION	GOBP_NEUROTRANSMITTER_SECRETION	3/171	146/17872	0.1644476587203	0.405923130184262	0.344807337266243	STXBP2/PPT1/STX3	3
GOBP_ADULT_LOCOMOTORY_BEHAVIOR	GOBP_ADULT_LOCOMOTORY_BEHAVIOR	GOBP_ADULT_LOCOMOTORY_BEHAVIOR	2/171	76/17872	0.164624059690676	0.405923130184262	0.344807337266243	CSTB/PPT1	2
GOBP_NEGATIVE_REGULATION_OF_WOUND_HEALING	GOBP_NEGATIVE_REGULATION_OF_WOUND_HEALING	GOBP_NEGATIVE_REGULATION_OF_WOUND_HEALING	2/171	76/17872	0.164624059690676	0.405923130184262	0.344807337266243	APOE/CD9	2
GOBP_POSITIVE_REGULATION_OF_BLOOD_VESSEL_ENDOTHELIAL_CELL_MIGRATION	GOBP_POSITIVE_REGULATION_OF_BLOOD_VESSEL_ENDOTHELIAL_CELL_MIGRATION	GOBP_POSITIVE_REGULATION_OF_BLOOD_VESSEL_ENDOTHELIAL_CELL_MIGRATION	2/171	76/17872	0.164624059690676	0.405923130184262	0.344807337266243	TMSB4X/HIF1A	2
GOBP_T_CELL_DIFFERENTIATION_INVOLVED_IN_IMMUNE_RESPONSE	GOBP_T_CELL_DIFFERENTIATION_INVOLVED_IN_IMMUNE_RESPONSE	GOBP_T_CELL_DIFFERENTIATION_INVOLVED_IN_IMMUNE_RESPONSE	2/171	76/17872	0.164624059690676	0.405923130184262	0.344807337266243	FCER1G/MALT1	2
GOBP_REGULATION_OF_INTRACELLULAR_PROTEIN_TRANSPORT	GOBP_REGULATION_OF_INTRACELLULAR_PROTEIN_TRANSPORT	GOBP_REGULATION_OF_INTRACELLULAR_PROTEIN_TRANSPORT	4/171	223/17872	0.165903889262939	0.405923130184262	0.344807337266243	OAZ1/ITGB2/USP36/CD36	4
GOBP_CELLULAR_RESPONSE_TO_REACTIVE_OXYGEN_SPECIES	GOBP_CELLULAR_RESPONSE_TO_REACTIVE_OXYGEN_SPECIES	GOBP_CELLULAR_RESPONSE_TO_REACTIVE_OXYGEN_SPECIES	3/171	147/17872	0.166772727728685	0.405923130184262	0.344807337266243	RPS3/RACK1/CD36	3
GOBP_RESPONSE_TO_UV	GOBP_RESPONSE_TO_UV	GOBP_RESPONSE_TO_UV	3/171	147/17872	0.166772727728685	0.405923130184262	0.344807337266243	GPX1/MAP4K3/CARD16	3
GOBP_ACTIVATION_OF_CYSTEINE_TYPE_ENDOPEPTIDASE_ACTIVITY	GOBP_ACTIVATION_OF_CYSTEINE_TYPE_ENDOPEPTIDASE_ACTIVITY	GOBP_ACTIVATION_OF_CYSTEINE_TYPE_ENDOPEPTIDASE_ACTIVITY	1/171	19/17872	0.167032399143618	0.405923130184262	0.344807337266243	PYCARD	1
GOBP_ESTABLISHMENT_OF_EPITHELIAL_CELL_APICAL_BASAL_POLARITY	GOBP_ESTABLISHMENT_OF_EPITHELIAL_CELL_APICAL_BASAL_POLARITY	GOBP_ESTABLISHMENT_OF_EPITHELIAL_CELL_APICAL_BASAL_POLARITY	1/171	19/17872	0.167032399143618	0.405923130184262	0.344807337266243	EZR	1
GOBP_INOSITOL_PHOSPHATE_CATABOLIC_PROCESS	GOBP_INOSITOL_PHOSPHATE_CATABOLIC_PROCESS	GOBP_INOSITOL_PHOSPHATE_CATABOLIC_PROCESS	1/171	19/17872	0.167032399143618	0.405923130184262	0.344807337266243	INPP5A	1
GOBP_MAMMARY_GLAND_ALVEOLUS_DEVELOPMENT	GOBP_MAMMARY_GLAND_ALVEOLUS_DEVELOPMENT	GOBP_MAMMARY_GLAND_ALVEOLUS_DEVELOPMENT	1/171	19/17872	0.167032399143618	0.405923130184262	0.344807337266243	HIF1A	1
GOBP_MITOCHONDRIAL_ATP_SYNTHESIS_COUPLED_PROTON_TRANSPORT	GOBP_MITOCHONDRIAL_ATP_SYNTHESIS_COUPLED_PROTON_TRANSPORT	GOBP_MITOCHONDRIAL_ATP_SYNTHESIS_COUPLED_PROTON_TRANSPORT	1/171	19/17872	0.167032399143618	0.405923130184262	0.344807337266243	ATP5MG	1
GOBP_NEGATIVE_REGULATION_OF_DNA_TEMPLATED_TRANSCRIPTION_ELONGATION	GOBP_NEGATIVE_REGULATION_OF_DNA_TEMPLATED_TRANSCRIPTION_ELONGATION	GOBP_NEGATIVE_REGULATION_OF_DNA_TEMPLATED_TRANSCRIPTION_ELONGATION	1/171	19/17872	0.167032399143618	0.405923130184262	0.344807337266243	SUPT4H1	1
GOBP_NEGATIVE_REGULATION_OF_LIPOPROTEIN_PARTICLE_CLEARANCE	GOBP_NEGATIVE_REGULATION_OF_LIPOPROTEIN_PARTICLE_CLEARANCE	GOBP_NEGATIVE_REGULATION_OF_LIPOPROTEIN_PARTICLE_CLEARANCE	1/171	19/17872	0.167032399143618	0.405923130184262	0.344807337266243	APOC1	1
GOBP_NEGATIVE_REGULATION_OF_MACROPHAGE_ACTIVATION	GOBP_NEGATIVE_REGULATION_OF_MACROPHAGE_ACTIVATION	GOBP_NEGATIVE_REGULATION_OF_MACROPHAGE_ACTIVATION	1/171	19/17872	0.167032399143618	0.405923130184262	0.344807337266243	GRN	1
GOBP_POLYAMINE_METABOLIC_PROCESS	GOBP_POLYAMINE_METABOLIC_PROCESS	GOBP_POLYAMINE_METABOLIC_PROCESS	1/171	19/17872	0.167032399143618	0.405923130184262	0.344807337266243	OAZ1	1
GOBP_POSITIVE_REGULATION_OF_MACROPHAGE_DERIVED_FOAM_CELL_DIFFERENTIATION	GOBP_POSITIVE_REGULATION_OF_MACROPHAGE_DERIVED_FOAM_CELL_DIFFERENTIATION	GOBP_POSITIVE_REGULATION_OF_MACROPHAGE_DERIVED_FOAM_CELL_DIFFERENTIATION	1/171	19/17872	0.167032399143618	0.405923130184262	0.344807337266243	CD36	1
GOBP_RESPONSE_TO_MAGNESIUM_ION	GOBP_RESPONSE_TO_MAGNESIUM_ION	GOBP_RESPONSE_TO_MAGNESIUM_ION	1/171	19/17872	0.167032399143618	0.405923130184262	0.344807337266243	CD14	1
GOBP_RETINA_VASCULATURE_DEVELOPMENT_IN_CAMERA_TYPE_EYE	GOBP_RETINA_VASCULATURE_DEVELOPMENT_IN_CAMERA_TYPE_EYE	GOBP_RETINA_VASCULATURE_DEVELOPMENT_IN_CAMERA_TYPE_EYE	1/171	19/17872	0.167032399143618	0.405923130184262	0.344807337266243	HIF1A	1
GOBP_TELOMERASE_RNA_LOCALIZATION	GOBP_TELOMERASE_RNA_LOCALIZATION	GOBP_TELOMERASE_RNA_LOCALIZATION	1/171	19/17872	0.167032399143618	0.405923130184262	0.344807337266243	NOP10	1
GOBP_AXO_DENDRITIC_TRANSPORT	GOBP_AXO_DENDRITIC_TRANSPORT	GOBP_AXO_DENDRITIC_TRANSPORT	2/171	77/17872	0.16801082137503	0.406440756948251	0.345247030136436	HIF1A/HSPA8	2
GOBP_NEGATIVE_REGULATION_OF_ERK1_AND_ERK2_CASCADE	GOBP_NEGATIVE_REGULATION_OF_ERK1_AND_ERK2_CASCADE	GOBP_NEGATIVE_REGULATION_OF_ERK1_AND_ERK2_CASCADE	2/171	77/17872	0.16801082137503	0.406440756948251	0.345247030136436	EZR/GSTP1	2
GOBP_POSITIVE_REGULATION_OF_INTERFERON_GAMMA_PRODUCTION	GOBP_POSITIVE_REGULATION_OF_INTERFERON_GAMMA_PRODUCTION	GOBP_POSITIVE_REGULATION_OF_INTERFERON_GAMMA_PRODUCTION	2/171	77/17872	0.16801082137503	0.406440756948251	0.345247030136436	PYCARD/CD14	2
GOBP_REGULATION_OF_TOLL_LIKE_RECEPTOR_SIGNALING_PATHWAY	GOBP_REGULATION_OF_TOLL_LIKE_RECEPTOR_SIGNALING_PATHWAY	GOBP_REGULATION_OF_TOLL_LIKE_RECEPTOR_SIGNALING_PATHWAY	2/171	77/17872	0.16801082137503	0.406440756948251	0.345247030136436	CYBA/CD36	2
GOBP_REGULATION_OF_CELL_MORPHOGENESIS	GOBP_REGULATION_OF_CELL_MORPHOGENESIS	GOBP_REGULATION_OF_CELL_MORPHOGENESIS	5/171	305/17872	0.168795339503002	0.407410569436792	0.346070827641323	ITGB2/CFL1/EZR/ALDOA/ARPC2	5
GOBP_REGULATION_OF_TRANSPORTER_ACTIVITY	GOBP_REGULATION_OF_TRANSPORTER_ACTIVITY	GOBP_REGULATION_OF_TRANSPORTER_ACTIVITY	5/171	305/17872	0.168795339503002	0.407410569436792	0.346070827641323	TMSB4X/ACTB/OXSR1/NDUFA4/FXYD5	5
GOBP_REGULATION_OF_CHEMOTAXIS	GOBP_REGULATION_OF_CHEMOTAXIS	GOBP_REGULATION_OF_CHEMOTAXIS	4/171	225/17872	0.169603244139463	0.407842762657895	0.346437949844203	TMSB4X/AIF1/STX3/OXSR1	4
GOBP_REGULATION_OF_PROTEIN_TARGETING	GOBP_REGULATION_OF_PROTEIN_TARGETING	GOBP_REGULATION_OF_PROTEIN_TARGETING	2/171	78/17872	0.171409558255236	0.407842762657895	0.346437949844203	ITGB2/USP36	2
GOBP_CELL_CELL_JUNCTION_ASSEMBLY	GOBP_CELL_CELL_JUNCTION_ASSEMBLY	GOBP_CELL_CELL_JUNCTION_ASSEMBLY	3/171	150/17872	0.173805590787802	0.407842762657895	0.346437949844203	ACTB/ACTG1/CD9	3
GOBP_POSITIVE_REGULATION_OF_NEURON_PROJECTION_DEVELOPMENT	GOBP_POSITIVE_REGULATION_OF_NEURON_PROJECTION_DEVELOPMENT	GOBP_POSITIVE_REGULATION_OF_NEURON_PROJECTION_DEVELOPMENT	3/171	150/17872	0.173805590787802	0.407842762657895	0.346437949844203	GRN/APOE/S100A9	3
GOBP_RESPONSE_TO_NUTRIENT	GOBP_RESPONSE_TO_NUTRIENT	GOBP_RESPONSE_TO_NUTRIENT	3/171	150/17872	0.173805590787802	0.407842762657895	0.346437949844203	GPX1/TSPO/SLC27A4	3
GOBP_ANTIMICROBIAL_HUMORAL_IMMUNE_RESPONSE_MEDIATED_BY_ANTIMICROBIAL_PEPTIDE	GOBP_ANTIMICROBIAL_HUMORAL_IMMUNE_RESPONSE_MEDIATED_BY_ANTIMICROBIAL_PEPTIDE	GOBP_ANTIMICROBIAL_HUMORAL_IMMUNE_RESPONSE_MEDIATED_BY_ANTIMICROBIAL_PEPTIDE	2/171	79/17872	0.174819735570268	0.407842762657895	0.346437949844203	S100A9/RPS19	2
GOBP_NEGATIVE_REGULATION_OF_TUMOR_NECROSIS_FACTOR_SUPERFAMILY_CYTOKINE_PRODUCTION	GOBP_NEGATIVE_REGULATION_OF_TUMOR_NECROSIS_FACTOR_SUPERFAMILY_CYTOKINE_PRODUCTION	GOBP_NEGATIVE_REGULATION_OF_TUMOR_NECROSIS_FACTOR_SUPERFAMILY_CYTOKINE_PRODUCTION	2/171	79/17872	0.174819735570268	0.407842762657895	0.346437949844203	TSPO/GSTP1	2
GOBP_ARGININE_METABOLIC_PROCESS	GOBP_ARGININE_METABOLIC_PROCESS	GOBP_ARGININE_METABOLIC_PROCESS	1/171	20/17872	0.175010747866322	0.407842762657895	0.346437949844203	DDAH2	1
GOBP_C21_STEROID_HORMONE_BIOSYNTHETIC_PROCESS	GOBP_C21_STEROID_HORMONE_BIOSYNTHETIC_PROCESS	GOBP_C21_STEROID_HORMONE_BIOSYNTHETIC_PROCESS	1/171	20/17872	0.175010747866322	0.407842762657895	0.346437949844203	TSPO	1
GOBP_CONNECTIVE_TISSUE_REPLACEMENT	GOBP_CONNECTIVE_TISSUE_REPLACEMENT	GOBP_CONNECTIVE_TISSUE_REPLACEMENT	1/171	20/17872	0.175010747866322	0.407842762657895	0.346437949844203	HIF1A	1
GOBP_DENDRITIC_SPINE_MAINTENANCE	GOBP_DENDRITIC_SPINE_MAINTENANCE	GOBP_DENDRITIC_SPINE_MAINTENANCE	1/171	20/17872	0.175010747866322	0.407842762657895	0.346437949844203	APOE	1
GOBP_ENAMEL_MINERALIZATION	GOBP_ENAMEL_MINERALIZATION	GOBP_ENAMEL_MINERALIZATION	1/171	20/17872	0.175010747866322	0.407842762657895	0.346437949844203	FAM20A	1
GOBP_LINOLEIC_ACID_METABOLIC_PROCESS	GOBP_LINOLEIC_ACID_METABOLIC_PROCESS	GOBP_LINOLEIC_ACID_METABOLIC_PROCESS	1/171	20/17872	0.175010747866322	0.407842762657895	0.346437949844203	GSTP1	1
GOBP_MODIFICATION_OF_SYNAPTIC_STRUCTURE	GOBP_MODIFICATION_OF_SYNAPTIC_STRUCTURE	GOBP_MODIFICATION_OF_SYNAPTIC_STRUCTURE	1/171	20/17872	0.175010747866322	0.407842762657895	0.346437949844203	PFN1	1
GOBP_MODULATION_BY_HOST_OF_VIRAL_GENOME_REPLICATION	GOBP_MODULATION_BY_HOST_OF_VIRAL_GENOME_REPLICATION	GOBP_MODULATION_BY_HOST_OF_VIRAL_GENOME_REPLICATION	1/171	20/17872	0.175010747866322	0.407842762657895	0.346437949844203	HSPA8	1
GOBP_NEGATIVE_REGULATION_OF_BONE_MINERALIZATION	GOBP_NEGATIVE_REGULATION_OF_BONE_MINERALIZATION	GOBP_NEGATIVE_REGULATION_OF_BONE_MINERALIZATION	1/171	20/17872	0.175010747866322	0.407842762657895	0.346437949844203	HIF1A	1
GOBP_NEGATIVE_REGULATION_OF_RELEASE_OF_CYTOCHROME_C_FROM_MITOCHONDRIA	GOBP_NEGATIVE_REGULATION_OF_RELEASE_OF_CYTOCHROME_C_FROM_MITOCHONDRIA	GOBP_NEGATIVE_REGULATION_OF_RELEASE_OF_CYTOCHROME_C_FROM_MITOCHONDRIA	1/171	20/17872	0.175010747866322	0.407842762657895	0.346437949844203	GPX1	1
GOBP_NEGATIVE_REGULATION_OF_T_CELL_APOPTOTIC_PROCESS	GOBP_NEGATIVE_REGULATION_OF_T_CELL_APOPTOTIC_PROCESS	GOBP_NEGATIVE_REGULATION_OF_T_CELL_APOPTOTIC_PROCESS	1/171	20/17872	0.175010747866322	0.407842762657895	0.346437949844203	HIF1A	1
GOBP_NEGATIVE_REGULATION_OF_TRANSCRIPTION_REGULATORY_REGION_DNA_BINDING	GOBP_NEGATIVE_REGULATION_OF_TRANSCRIPTION_REGULATORY_REGION_DNA_BINDING	GOBP_NEGATIVE_REGULATION_OF_TRANSCRIPTION_REGULATORY_REGION_DNA_BINDING	1/171	20/17872	0.175010747866322	0.407842762657895	0.346437949844203	TMSB4X	1
GOBP_NLS_BEARING_PROTEIN_IMPORT_INTO_NUCLEUS	GOBP_NLS_BEARING_PROTEIN_IMPORT_INTO_NUCLEUS	GOBP_NLS_BEARING_PROTEIN_IMPORT_INTO_NUCLEUS	1/171	20/17872	0.175010747866322	0.407842762657895	0.346437949844203	RANBP2	1
GOBP_PODOSOME_ASSEMBLY	GOBP_PODOSOME_ASSEMBLY	GOBP_PODOSOME_ASSEMBLY	1/171	20/17872	0.175010747866322	0.407842762657895	0.346437949844203	CAPG	1
GOBP_POSITIVE_REGULATION_OF_GLYCOLYTIC_PROCESS	GOBP_POSITIVE_REGULATION_OF_GLYCOLYTIC_PROCESS	GOBP_POSITIVE_REGULATION_OF_GLYCOLYTIC_PROCESS	1/171	20/17872	0.175010747866322	0.407842762657895	0.346437949844203	HIF1A	1
GOBP_POSITIVE_REGULATION_OF_LYMPHOCYTE_CHEMOTAXIS	GOBP_POSITIVE_REGULATION_OF_LYMPHOCYTE_CHEMOTAXIS	GOBP_POSITIVE_REGULATION_OF_LYMPHOCYTE_CHEMOTAXIS	1/171	20/17872	0.175010747866322	0.407842762657895	0.346437949844203	OXSR1	1
GOBP_POSITIVE_REGULATION_OF_MONOCYTE_CHEMOTAXIS	GOBP_POSITIVE_REGULATION_OF_MONOCYTE_CHEMOTAXIS	GOBP_POSITIVE_REGULATION_OF_MONOCYTE_CHEMOTAXIS	1/171	20/17872	0.175010747866322	0.407842762657895	0.346437949844203	AIF1	1
GOBP_REGULATION_OF_AMYLOID_BETA_CLEARANCE	GOBP_REGULATION_OF_AMYLOID_BETA_CLEARANCE	GOBP_REGULATION_OF_AMYLOID_BETA_CLEARANCE	1/171	20/17872	0.175010747866322	0.407842762657895	0.346437949844203	APOE	1
GOBP_REGULATION_OF_ANTIGEN_PROCESSING_AND_PRESENTATION	GOBP_REGULATION_OF_ANTIGEN_PROCESSING_AND_PRESENTATION	GOBP_REGULATION_OF_ANTIGEN_PROCESSING_AND_PRESENTATION	1/171	20/17872	0.175010747866322	0.407842762657895	0.346437949844203	PYCARD	1
GOBP_REGULATION_OF_CATECHOLAMINE_METABOLIC_PROCESS	GOBP_REGULATION_OF_CATECHOLAMINE_METABOLIC_PROCESS	GOBP_REGULATION_OF_CATECHOLAMINE_METABOLIC_PROCESS	1/171	20/17872	0.175010747866322	0.407842762657895	0.346437949844203	ITGB2	1
GOBP_REGULATION_OF_LIPOPROTEIN_LIPASE_ACTIVITY	GOBP_REGULATION_OF_LIPOPROTEIN_LIPASE_ACTIVITY	GOBP_REGULATION_OF_LIPOPROTEIN_LIPASE_ACTIVITY	1/171	20/17872	0.175010747866322	0.407842762657895	0.346437949844203	APOC1	1
GOBP_REGULATION_OF_MICROGLIAL_CELL_ACTIVATION	GOBP_REGULATION_OF_MICROGLIAL_CELL_ACTIVATION	GOBP_REGULATION_OF_MICROGLIAL_CELL_ACTIVATION	1/171	20/17872	0.175010747866322	0.407842762657895	0.346437949844203	GRN	1
GOBP_REVERSE_CHOLESTEROL_TRANSPORT	GOBP_REVERSE_CHOLESTEROL_TRANSPORT	GOBP_REVERSE_CHOLESTEROL_TRANSPORT	1/171	20/17872	0.175010747866322	0.407842762657895	0.346437949844203	APOE	1
GOBP_CELLULAR_RESPONSE_TO_EXTERNAL_STIMULUS	GOBP_CELLULAR_RESPONSE_TO_EXTERNAL_STIMULUS	GOBP_CELLULAR_RESPONSE_TO_EXTERNAL_STIMULUS	5/171	309/17872	0.175118926338983	0.407842762657895	0.346437949844203	CYBA/AIF1/GABARAP/HSPA8/MAP1LC3B	5
GOBP_GLYCEROPHOSPHOLIPID_METABOLIC_PROCESS	GOBP_GLYCEROPHOSPHOLIPID_METABOLIC_PROCESS	GOBP_GLYCEROPHOSPHOLIPID_METABOLIC_PROCESS	5/171	309/17872	0.175118926338983	0.407842762657895	0.346437949844203	APOC1/DBI/GPAT3/FABP5/INPP5A	5
GOBP_MYELOID_CELL_DIFFERENTIATION	GOBP_MYELOID_CELL_DIFFERENTIATION	GOBP_MYELOID_CELL_DIFFERENTIATION	6/171	393/17872	0.175692256864695	0.408729850581175	0.347191477795686	TYROBP/HIF1A/RPS14/RPS6/C1QC/RPS19	6
GOBP_REGULATION_OF_CELL_SHAPE	GOBP_REGULATION_OF_CELL_SHAPE	GOBP_REGULATION_OF_CELL_SHAPE	3/171	151/17872	0.176168501825557	0.409389384986306	0.34775171269032	ITGB2/EZR/ALDOA	3
GOBP_ASSOCIATIVE_LEARNING	GOBP_ASSOCIATIVE_LEARNING	GOBP_ASSOCIATIVE_LEARNING	2/171	80/17872	0.178240827583556	0.411554521863377	0.349590866524843	HIF1A/PPT1	2
GOBP_CYCLIC_NUCLEOTIDE_MEDIATED_SIGNALING	GOBP_CYCLIC_NUCLEOTIDE_MEDIATED_SIGNALING	GOBP_CYCLIC_NUCLEOTIDE_MEDIATED_SIGNALING	2/171	80/17872	0.178240827583556	0.411554521863377	0.349590866524843	APOE/CD36	2
GOBP_RESPONSE_TO_OSMOTIC_STRESS	GOBP_RESPONSE_TO_OSMOTIC_STRESS	GOBP_RESPONSE_TO_OSMOTIC_STRESS	2/171	80/17872	0.178240827583556	0.411554521863377	0.349590866524843	TSPO/OXSR1	2
GOBP_RETINA_HOMEOSTASIS	GOBP_RETINA_HOMEOSTASIS	GOBP_RETINA_HOMEOSTASIS	2/171	80/17872	0.178240827583556	0.411554521863377	0.349590866524843	ACTB/ACTG1	2
GOBP_TRANSCRIPTION_INITIATION_FROM_RNA_POLYMERASE_II_PROMOTER	GOBP_TRANSCRIPTION_INITIATION_FROM_RNA_POLYMERASE_II_PROMOTER	GOBP_TRANSCRIPTION_INITIATION_FROM_RNA_POLYMERASE_II_PROMOTER	2/171	80/17872	0.178240827583556	0.411554521863377	0.349590866524843	ELOB/SUB1	2
GOBP_REGULATION_OF_ENDOTHELIAL_CELL_MIGRATION	GOBP_REGULATION_OF_ENDOTHELIAL_CELL_MIGRATION	GOBP_REGULATION_OF_ENDOTHELIAL_CELL_MIGRATION	4/171	231/17872	0.180873071860806	0.411554521863377	0.349590866524843	TMSB4X/HIF1A/GRN/APOE	4
GOBP_MONOVALENT_INORGANIC_CATION_HOMEOSTASIS	GOBP_MONOVALENT_INORGANIC_CATION_HOMEOSTASIS	GOBP_MONOVALENT_INORGANIC_CATION_HOMEOSTASIS	3/171	153/17872	0.180921192336244	0.411554521863377	0.349590866524843	GRN/ATP6V0E1/PPT1	3
GOBP_REGULATION_OF_EXTRINSIC_APOPTOTIC_SIGNALING_PATHWAY	GOBP_REGULATION_OF_EXTRINSIC_APOPTOTIC_SIGNALING_PATHWAY	GOBP_REGULATION_OF_EXTRINSIC_APOPTOTIC_SIGNALING_PATHWAY	3/171	153/17872	0.180921192336244	0.411554521863377	0.349590866524843	GPX1/PYCARD/GSTP1	3
GOBP_REGULATION_OF_RNA_SPLICING	GOBP_REGULATION_OF_RNA_SPLICING	GOBP_REGULATION_OF_RNA_SPLICING	3/171	153/17872	0.180921192336244	0.411554521863377	0.349590866524843	RPS26/RPS13/HSPA8	3
GOBP_CARBOHYDRATE_DERIVATIVE_TRANSPORT	GOBP_CARBOHYDRATE_DERIVATIVE_TRANSPORT	GOBP_CARBOHYDRATE_DERIVATIVE_TRANSPORT	2/171	81/17872	0.181672317460968	0.411554521863377	0.349590866524843	NPC2/SLC25A6	2
GOBP_FIBROBLAST_PROLIFERATION	GOBP_FIBROBLAST_PROLIFERATION	GOBP_FIBROBLAST_PROLIFERATION	2/171	81/17872	0.181672317460968	0.411554521863377	0.349590866524843	S100A6/GSTP1	2
GOBP_TELOMERE_MAINTENANCE_VIA_TELOMERE_LENGTHENING	GOBP_TELOMERE_MAINTENANCE_VIA_TELOMERE_LENGTHENING	GOBP_TELOMERE_MAINTENANCE_VIA_TELOMERE_LENGTHENING	2/171	81/17872	0.181672317460968	0.411554521863377	0.349590866524843	NOP10/HSP90AA1	2
GOBP_ALDITOL_METABOLIC_PROCESS	GOBP_ALDITOL_METABOLIC_PROCESS	GOBP_ALDITOL_METABOLIC_PROCESS	1/171	21/17872	0.182913120828167	0.411554521863377	0.349590866524843	TPI1	1
GOBP_CHOLESTEROL_STORAGE	GOBP_CHOLESTEROL_STORAGE	GOBP_CHOLESTEROL_STORAGE	1/171	21/17872	0.182913120828167	0.411554521863377	0.349590866524843	CD36	1
GOBP_DOSAGE_COMPENSATION	GOBP_DOSAGE_COMPENSATION	GOBP_DOSAGE_COMPENSATION	1/171	21/17872	0.182913120828167	0.411554521863377	0.349590866524843	EIF1	1
GOBP_INTESTINAL_LIPID_ABSORPTION	GOBP_INTESTINAL_LIPID_ABSORPTION	GOBP_INTESTINAL_LIPID_ABSORPTION	1/171	21/17872	0.182913120828167	0.411554521863377	0.349590866524843	CD36	1
GOBP_LIPID_DIGESTION	GOBP_LIPID_DIGESTION	GOBP_LIPID_DIGESTION	1/171	21/17872	0.182913120828167	0.411554521863377	0.349590866524843	CD36	1
GOBP_LIPOPROTEIN_LOCALIZATION	GOBP_LIPOPROTEIN_LOCALIZATION	GOBP_LIPOPROTEIN_LOCALIZATION	1/171	21/17872	0.182913120828167	0.411554521863377	0.349590866524843	CD36	1
GOBP_MONOCYTE_CHEMOTACTIC_PROTEIN_1_PRODUCTION	GOBP_MONOCYTE_CHEMOTACTIC_PROTEIN_1_PRODUCTION	GOBP_MONOCYTE_CHEMOTACTIC_PROTEIN_1_PRODUCTION	1/171	21/17872	0.182913120828167	0.411554521863377	0.349590866524843	GSTP1	1
GOBP_NEGATIVE_REGULATION_OF_CELLULAR_SENESCENCE	GOBP_NEGATIVE_REGULATION_OF_CELLULAR_SENESCENCE	GOBP_NEGATIVE_REGULATION_OF_CELLULAR_SENESCENCE	1/171	21/17872	0.182913120828167	0.411554521863377	0.349590866524843	YBX1	1
GOBP_NEGATIVE_REGULATION_OF_FATTY_ACID_BIOSYNTHETIC_PROCESS	GOBP_NEGATIVE_REGULATION_OF_FATTY_ACID_BIOSYNTHETIC_PROCESS	GOBP_NEGATIVE_REGULATION_OF_FATTY_ACID_BIOSYNTHETIC_PROCESS	1/171	21/17872	0.182913120828167	0.411554521863377	0.349590866524843	APOC1	1
GOBP_NITRIC_OXIDE_SYNTHASE_BIOSYNTHETIC_PROCESS	GOBP_NITRIC_OXIDE_SYNTHASE_BIOSYNTHETIC_PROCESS	GOBP_NITRIC_OXIDE_SYNTHASE_BIOSYNTHETIC_PROCESS	1/171	21/17872	0.182913120828167	0.411554521863377	0.349590866524843	GSTP1	1
GOBP_NUCLEOTIDE_TRANSMEMBRANE_TRANSPORT	GOBP_NUCLEOTIDE_TRANSMEMBRANE_TRANSPORT	GOBP_NUCLEOTIDE_TRANSMEMBRANE_TRANSPORT	1/171	21/17872	0.182913120828167	0.411554521863377	0.349590866524843	SLC25A6	1
GOBP_POSITIVE_REGULATION_OF_MAST_CELL_ACTIVATION	GOBP_POSITIVE_REGULATION_OF_MAST_CELL_ACTIVATION	GOBP_POSITIVE_REGULATION_OF_MAST_CELL_ACTIVATION	1/171	21/17872	0.182913120828167	0.411554521863377	0.349590866524843	VAMP8	1
GOBP_POSITIVE_REGULATION_OF_VACUOLE_ORGANIZATION	GOBP_POSITIVE_REGULATION_OF_VACUOLE_ORGANIZATION	GOBP_POSITIVE_REGULATION_OF_VACUOLE_ORGANIZATION	1/171	21/17872	0.182913120828167	0.411554521863377	0.349590866524843	GRN	1
GOBP_POSITIVE_REGULATION_OF_VIRAL_LIFE_CYCLE	GOBP_POSITIVE_REGULATION_OF_VIRAL_LIFE_CYCLE	GOBP_POSITIVE_REGULATION_OF_VIRAL_LIFE_CYCLE	1/171	21/17872	0.182913120828167	0.411554521863377	0.349590866524843	LGALS1	1
GOBP_REGULATION_OF_ARP2_3_COMPLEX_MEDIATED_ACTIN_NUCLEATION	GOBP_REGULATION_OF_ARP2_3_COMPLEX_MEDIATED_ACTIN_NUCLEATION	GOBP_REGULATION_OF_ARP2_3_COMPLEX_MEDIATED_ACTIN_NUCLEATION	1/171	21/17872	0.182913120828167	0.411554521863377	0.349590866524843	GMFG	1
GOBP_REGULATION_OF_NUCLEASE_ACTIVITY	GOBP_REGULATION_OF_NUCLEASE_ACTIVITY	GOBP_REGULATION_OF_NUCLEASE_ACTIVITY	1/171	21/17872	0.182913120828167	0.411554521863377	0.349590866524843	RPS3	1
GOBP_REGULATION_OF_RAC_PROTEIN_SIGNAL_TRANSDUCTION	GOBP_REGULATION_OF_RAC_PROTEIN_SIGNAL_TRANSDUCTION	GOBP_REGULATION_OF_RAC_PROTEIN_SIGNAL_TRANSDUCTION	1/171	21/17872	0.182913120828167	0.411554521863377	0.349590866524843	GABARAP	1
GOBP_RESPONSE_TO_MUSCLE_ACTIVITY	GOBP_RESPONSE_TO_MUSCLE_ACTIVITY	GOBP_RESPONSE_TO_MUSCLE_ACTIVITY	1/171	21/17872	0.182913120828167	0.411554521863377	0.349590866524843	HIF1A	1
GOBP_CARBOHYDRATE_CATABOLIC_PROCESS	GOBP_CARBOHYDRATE_CATABOLIC_PROCESS	GOBP_CARBOHYDRATE_CATABOLIC_PROCESS	3/171	154/17872	0.183310618090028	0.412012436849968	0.349979837823791	HIF1A/ALDOA/TPI1	3
GOBP_VACUOLAR_LOCALIZATION	GOBP_VACUOLAR_LOCALIZATION	GOBP_VACUOLAR_LOCALIZATION	2/171	82/17872	0.185113697150277	0.415520270819447	0.352959532255195	VAMP8/STXBP2	2
GOBP_POSITIVE_REGULATION_OF_INTRACELLULAR_PROTEIN_TRANSPORT	GOBP_POSITIVE_REGULATION_OF_INTRACELLULAR_PROTEIN_TRANSPORT	GOBP_POSITIVE_REGULATION_OF_INTRACELLULAR_PROTEIN_TRANSPORT	3/171	155/17872	0.185708529292713	0.415520270819447	0.352959532255195	OAZ1/ITGB2/USP36	3
GOBP_POSITIVE_REGULATION_OF_ORGANELLE_ORGANIZATION	GOBP_POSITIVE_REGULATION_OF_ORGANELLE_ORGANIZATION	GOBP_POSITIVE_REGULATION_OF_ORGANELLE_ORGANIZATION	7/171	487/17872	0.186522067503907	0.415520270819447	0.352959532255195	HIF1A/PFN1/RPS3/GRN/PYCARD/ARPC2/CAPG	7
GOBP_REGULATION_OF_HORMONE_SECRETION	GOBP_REGULATION_OF_HORMONE_SECRETION	GOBP_REGULATION_OF_HORMONE_SECRETION	4/171	234/17872	0.186600410839436	0.415520270819447	0.352959532255195	VAMP8/HIF1A/SELENOT/SERP1	4
GOBP_CARBOHYDRATE_TRANSPORT	GOBP_CARBOHYDRATE_TRANSPORT	GOBP_CARBOHYDRATE_TRANSPORT	3/171	156/17872	0.188114750514775	0.415520270819447	0.352959532255195	EZR/SLC27A4/FABP5	3
GOBP_PLASMA_MEMBRANE_ORGANIZATION	GOBP_PLASMA_MEMBRANE_ORGANIZATION	GOBP_PLASMA_MEMBRANE_ORGANIZATION	3/171	156/17872	0.188114750514775	0.415520270819447	0.352959532255195	S100A9/CD9/SERP1	3
GOBP_VACUOLAR_TRANSPORT	GOBP_VACUOLAR_TRANSPORT	GOBP_VACUOLAR_TRANSPORT	3/171	156/17872	0.188114750514775	0.415520270819447	0.352959532255195	GRN/HSPA8/ZFYVE16	3
GOBP_REGULATED_EXOCYTOSIS	GOBP_REGULATED_EXOCYTOSIS	GOBP_REGULATED_EXOCYTOSIS	4/171	235/17872	0.18852264881026	0.415520270819447	0.352959532255195	VAMP8/ITGB2/STXBP2/STX3	4
GOBP_DNA_TEMPLATED_TRANSCRIPTION_ELONGATION	GOBP_DNA_TEMPLATED_TRANSCRIPTION_ELONGATION	GOBP_DNA_TEMPLATED_TRANSCRIPTION_ELONGATION	2/171	83/17872	0.1885644672621	0.415520270819447	0.352959532255195	SUPT4H1/ELOB	2
GOBP_POSITIVE_REGULATION_OF_EXOCYTOSIS	GOBP_POSITIVE_REGULATION_OF_EXOCYTOSIS	GOBP_POSITIVE_REGULATION_OF_EXOCYTOSIS	2/171	83/17872	0.1885644672621	0.415520270819447	0.352959532255195	VAMP8/ITGB2	2
GOBP_POSITIVE_REGULATION_OF_PROTEIN_BINDING	GOBP_POSITIVE_REGULATION_OF_PROTEIN_BINDING	GOBP_POSITIVE_REGULATION_OF_PROTEIN_BINDING	2/171	83/17872	0.1885644672621	0.415520270819447	0.352959532255195	APOE/RPL11	2
GOBP_RESPONSE_TO_VITAMIN	GOBP_RESPONSE_TO_VITAMIN	GOBP_RESPONSE_TO_VITAMIN	2/171	83/17872	0.1885644672621	0.415520270819447	0.352959532255195	GPX1/TSPO	2
GOBP_ORGANIC_ACID_BIOSYNTHETIC_PROCESS	GOBP_ORGANIC_ACID_BIOSYNTHETIC_PROCESS	GOBP_ORGANIC_ACID_BIOSYNTHETIC_PROCESS	5/171	318/17872	0.189671278310713	0.415520270819447	0.352959532255195	APOC1/LTA4H/FABP5/GSTP1/MGST3	5
GOBP_CELL_MATRIX_ADHESION	GOBP_CELL_MATRIX_ADHESION	GOBP_CELL_MATRIX_ADHESION	4/171	236/17872	0.190451306793506	0.415520270819447	0.352959532255195	CD63/ITGB2/ACTG1/CD36	4
GOBP_RESPONSE_TO_CORTICOSTEROID	GOBP_RESPONSE_TO_CORTICOSTEROID	GOBP_RESPONSE_TO_CORTICOSTEROID	3/171	157/17872	0.190529106940965	0.415520270819447	0.352959532255195	CYBA/AIF1/RPL27	3
GOBP_FUSION_OF_SPERM_TO_EGG_PLASMA_MEMBRANE_INVOLVED_IN_SINGLE_FERTILIZATION	GOBP_FUSION_OF_SPERM_TO_EGG_PLASMA_MEMBRANE_INVOLVED_IN_SINGLE_FERTILIZATION	GOBP_FUSION_OF_SPERM_TO_EGG_PLASMA_MEMBRANE_INVOLVED_IN_SINGLE_FERTILIZATION	1/171	22/17872	0.190740237311187	0.415520270819447	0.352959532255195	CD9	1
GOBP_MITOCHONDRIAL_CYTOCHROME_C_OXIDASE_ASSEMBLY	GOBP_MITOCHONDRIAL_CYTOCHROME_C_OXIDASE_ASSEMBLY	GOBP_MITOCHONDRIAL_CYTOCHROME_C_OXIDASE_ASSEMBLY	1/171	22/17872	0.190740237311187	0.415520270819447	0.352959532255195	COX14	1
GOBP_MYELIN_ASSEMBLY	GOBP_MYELIN_ASSEMBLY	GOBP_MYELIN_ASSEMBLY	1/171	22/17872	0.190740237311187	0.415520270819447	0.352959532255195	CD9	1
GOBP_NEGATIVE_REGULATION_OF_GLUCOSE_TRANSMEMBRANE_TRANSPORT	GOBP_NEGATIVE_REGULATION_OF_GLUCOSE_TRANSMEMBRANE_TRANSPORT	GOBP_NEGATIVE_REGULATION_OF_GLUCOSE_TRANSMEMBRANE_TRANSPORT	1/171	22/17872	0.190740237311187	0.415520270819447	0.352959532255195	FABP5	1
GOBP_NEGATIVE_REGULATION_OF_NUCLEOCYTOPLASMIC_TRANSPORT	GOBP_NEGATIVE_REGULATION_OF_NUCLEOCYTOPLASMIC_TRANSPORT	GOBP_NEGATIVE_REGULATION_OF_NUCLEOCYTOPLASMIC_TRANSPORT	1/171	22/17872	0.190740237311187	0.415520270819447	0.352959532255195	CD36	1
GOBP_NEGATIVE_REGULATION_OF_PHAGOCYTOSIS	GOBP_NEGATIVE_REGULATION_OF_PHAGOCYTOSIS	GOBP_NEGATIVE_REGULATION_OF_PHAGOCYTOSIS	1/171	22/17872	0.190740237311187	0.415520270819447	0.352959532255195	RACK1	1
GOBP_NEGATIVE_REGULATION_OF_RESPONSE_TO_REACTIVE_OXYGEN_SPECIES	GOBP_NEGATIVE_REGULATION_OF_RESPONSE_TO_REACTIVE_OXYGEN_SPECIES	GOBP_NEGATIVE_REGULATION_OF_RESPONSE_TO_REACTIVE_OXYGEN_SPECIES	1/171	22/17872	0.190740237311187	0.415520270819447	0.352959532255195	RACK1	1
GOBP_NEGATIVE_REGULATION_OF_TISSUE_REMODELING	GOBP_NEGATIVE_REGULATION_OF_TISSUE_REMODELING	GOBP_NEGATIVE_REGULATION_OF_TISSUE_REMODELING	1/171	22/17872	0.190740237311187	0.415520270819447	0.352959532255195	CST3	1
GOBP_NEGATIVE_REGULATION_OF_VIRAL_ENTRY_INTO_HOST_CELL	GOBP_NEGATIVE_REGULATION_OF_VIRAL_ENTRY_INTO_HOST_CELL	GOBP_NEGATIVE_REGULATION_OF_VIRAL_ENTRY_INTO_HOST_CELL	1/171	22/17872	0.190740237311187	0.415520270819447	0.352959532255195	FCN1	1
GOBP_NOREPINEPHRINE_TRANSPORT	GOBP_NOREPINEPHRINE_TRANSPORT	GOBP_NOREPINEPHRINE_TRANSPORT	1/171	22/17872	0.190740237311187	0.415520270819447	0.352959532255195	ACTB	1
GOBP_PEROXISOME_PROLIFERATOR_ACTIVATED_RECEPTOR_SIGNALING_PATHWAY	GOBP_PEROXISOME_PROLIFERATOR_ACTIVATED_RECEPTOR_SIGNALING_PATHWAY	GOBP_PEROXISOME_PROLIFERATOR_ACTIVATED_RECEPTOR_SIGNALING_PATHWAY	1/171	22/17872	0.190740237311187	0.415520270819447	0.352959532255195	FABP5	1
GOBP_POSITIVE_REGULATION_OF_T_HELPER_CELL_DIFFERENTIATION	GOBP_POSITIVE_REGULATION_OF_T_HELPER_CELL_DIFFERENTIATION	GOBP_POSITIVE_REGULATION_OF_T_HELPER_CELL_DIFFERENTIATION	1/171	22/17872	0.190740237311187	0.415520270819447	0.352959532255195	MALT1	1
GOBP_REGULATION_OF_HORMONE_BIOSYNTHETIC_PROCESS	GOBP_REGULATION_OF_HORMONE_BIOSYNTHETIC_PROCESS	GOBP_REGULATION_OF_HORMONE_BIOSYNTHETIC_PROCESS	1/171	22/17872	0.190740237311187	0.415520270819447	0.352959532255195	HIF1A	1
GOBP_RESPONSE_TO_MANGANESE_ION	GOBP_RESPONSE_TO_MANGANESE_ION	GOBP_RESPONSE_TO_MANGANESE_ION	1/171	22/17872	0.190740237311187	0.415520270819447	0.352959532255195	TSPO	1
GOBP_VESICLE_FUSION_TO_PLASMA_MEMBRANE	GOBP_VESICLE_FUSION_TO_PLASMA_MEMBRANE	GOBP_VESICLE_FUSION_TO_PLASMA_MEMBRANE	1/171	22/17872	0.190740237311187	0.415520270819447	0.352959532255195	STX3	1
GOBP_MEMBRANE_DEPOLARIZATION	GOBP_MEMBRANE_DEPOLARIZATION	GOBP_MEMBRANE_DEPOLARIZATION	2/171	84/17872	0.192024136952287	0.417820551548096	0.354913482680859	TSPO/RACK1	2
GOBP_ANTIGEN_RECEPTOR_MEDIATED_SIGNALING_PATHWAY	GOBP_ANTIGEN_RECEPTOR_MEDIATED_SIGNALING_PATHWAY	GOBP_ANTIGEN_RECEPTOR_MEDIATED_SIGNALING_PATHWAY	4/171	237/17872	0.192386299159152	0.417820551548096	0.354913482680859	RPS3/EZR/MNDA/MALT1	4
GOBP_NEGATIVE_REGULATION_OF_KINASE_ACTIVITY	GOBP_NEGATIVE_REGULATION_OF_KINASE_ACTIVITY	GOBP_NEGATIVE_REGULATION_OF_KINASE_ACTIVITY	4/171	237/17872	0.192386299159152	0.417820551548096	0.354913482680859	RACK1/APOE/PYCARD/GSTP1	4
GOBP_POSITIVE_REGULATION_OF_LEUKOCYTE_PROLIFERATION	GOBP_POSITIVE_REGULATION_OF_LEUKOCYTE_PROLIFERATION	GOBP_POSITIVE_REGULATION_OF_LEUKOCYTE_PROLIFERATION	3/171	158/17872	0.192951424392741	0.41861984209416	0.355592432029631	RPS3/AIF1/PYCARD	3
GOBP_POSITIVE_REGULATION_OF_HEMOPOIESIS	GOBP_POSITIVE_REGULATION_OF_HEMOPOIESIS	GOBP_POSITIVE_REGULATION_OF_HEMOPOIESIS	3/171	159/17872	0.19538152935007	0.422406392027884	0.358808878945284	TYROBP/LGALS1/MALT1	3
GOBP_CELLULAR_RESPONSE_TO_VIRUS	GOBP_CELLULAR_RESPONSE_TO_VIRUS	GOBP_CELLULAR_RESPONSE_TO_VIRUS	2/171	85/17872	0.195492223805749	0.422406392027884	0.358808878945284	HIF1A/HSP90AA1	2
GOBP_EXTRINSIC_APOPTOTIC_SIGNALING_PATHWAY_VIA_DEATH_DOMAIN_RECEPTORS	GOBP_EXTRINSIC_APOPTOTIC_SIGNALING_PATHWAY_VIA_DEATH_DOMAIN_RECEPTORS	GOBP_EXTRINSIC_APOPTOTIC_SIGNALING_PATHWAY_VIA_DEATH_DOMAIN_RECEPTORS	2/171	85/17872	0.195492223805749	0.422406392027884	0.358808878945284	GPX1/GABARAP	2
GOBP_NEGATIVE_REGULATION_OF_CYSTEINE_TYPE_ENDOPEPTIDASE_ACTIVITY	GOBP_NEGATIVE_REGULATION_OF_CYSTEINE_TYPE_ENDOPEPTIDASE_ACTIVITY	GOBP_NEGATIVE_REGULATION_OF_CYSTEINE_TYPE_ENDOPEPTIDASE_ACTIVITY	2/171	85/17872	0.195492223805749	0.422406392027884	0.358808878945284	GPX1/CARD16	2
GOBP_PROTEASOMAL_PROTEIN_CATABOLIC_PROCESS	GOBP_PROTEASOMAL_PROTEIN_CATABOLIC_PROCESS	GOBP_PROTEASOMAL_PROTEIN_CATABOLIC_PROCESS	7/171	494/17872	0.195694624770427	0.42241400712641	0.358815347514455	GPX1/RACK1/APOE/RPL11/GABARAP/PSMA7/ELOB	7
GOBP_ESTABLISHMENT_OF_ORGANELLE_LOCALIZATION	GOBP_ESTABLISHMENT_OF_ORGANELLE_LOCALIZATION	GOBP_ESTABLISHMENT_OF_ORGANELLE_LOCALIZATION	6/171	408/17872	0.197242403675079	0.422443615304648	0.358840497884908	VAMP8/RPS15/HIF1A/STXBP2/CFL1/EZR	6
GOBP_CELLULAR_RESPONSE_TO_STARVATION	GOBP_CELLULAR_RESPONSE_TO_STARVATION	GOBP_CELLULAR_RESPONSE_TO_STARVATION	3/171	160/17872	0.197819248972577	0.422443615304648	0.358840497884908	GABARAP/HSPA8/MAP1LC3B	3
GOBP_CELLULAR_RESPONSE_TO_INTERFERON_BETA	GOBP_CELLULAR_RESPONSE_TO_INTERFERON_BETA	GOBP_CELLULAR_RESPONSE_TO_INTERFERON_BETA	1/171	23/17872	0.198492809827702	0.422443615304648	0.358840497884908	MNDA	1
GOBP_CHAPERONE_MEDIATED_PROTEIN_COMPLEX_ASSEMBLY	GOBP_CHAPERONE_MEDIATED_PROTEIN_COMPLEX_ASSEMBLY	GOBP_CHAPERONE_MEDIATED_PROTEIN_COMPLEX_ASSEMBLY	1/171	23/17872	0.198492809827702	0.422443615304648	0.358840497884908	HSP90AA1	1
GOBP_HISTONE_H2A_ACETYLATION	GOBP_HISTONE_H2A_ACETYLATION	GOBP_HISTONE_H2A_ACETYLATION	1/171	23/17872	0.198492809827702	0.422443615304648	0.358840497884908	ACTB	1
GOBP_INTESTINAL_EPITHELIAL_CELL_DIFFERENTIATION	GOBP_INTESTINAL_EPITHELIAL_CELL_DIFFERENTIATION	GOBP_INTESTINAL_EPITHELIAL_CELL_DIFFERENTIATION	1/171	23/17872	0.198492809827702	0.422443615304648	0.358840497884908	HIF1A	1
GOBP_LUNG_CELL_DIFFERENTIATION	GOBP_LUNG_CELL_DIFFERENTIATION	GOBP_LUNG_CELL_DIFFERENTIATION	1/171	23/17872	0.198492809827702	0.422443615304648	0.358840497884908	LTA4H	1
GOBP_MORPHOGENESIS_OF_AN_EPITHELIAL_FOLD	GOBP_MORPHOGENESIS_OF_AN_EPITHELIAL_FOLD	GOBP_MORPHOGENESIS_OF_AN_EPITHELIAL_FOLD	1/171	23/17872	0.198492809827702	0.422443615304648	0.358840497884908	HIF1A	1
GOBP_NEGATIVE_REGULATION_OF_INTERLEUKIN_10_PRODUCTION	GOBP_NEGATIVE_REGULATION_OF_INTERLEUKIN_10_PRODUCTION	GOBP_NEGATIVE_REGULATION_OF_INTERLEUKIN_10_PRODUCTION	1/171	23/17872	0.198492809827702	0.422443615304648	0.358840497884908	TYROBP	1
GOBP_POSITIVE_REGULATION_OF_MRNA_SPLICING_VIA_SPLICEOSOME	GOBP_POSITIVE_REGULATION_OF_MRNA_SPLICING_VIA_SPLICEOSOME	GOBP_POSITIVE_REGULATION_OF_MRNA_SPLICING_VIA_SPLICEOSOME	1/171	23/17872	0.198492809827702	0.422443615304648	0.358840497884908	HSPA8	1
GOBP_POSITIVE_REGULATION_OF_MYELOID_LEUKOCYTE_CYTOKINE_PRODUCTION_INVOLVED_IN_IMMUNE_RESPONSE	GOBP_POSITIVE_REGULATION_OF_MYELOID_LEUKOCYTE_CYTOKINE_PRODUCTION_INVOLVED_IN_IMMUNE_RESPONSE	GOBP_POSITIVE_REGULATION_OF_MYELOID_LEUKOCYTE_CYTOKINE_PRODUCTION_INVOLVED_IN_IMMUNE_RESPONSE	1/171	23/17872	0.198492809827702	0.422443615304648	0.358840497884908	CD36	1
GOBP_REGULATION_OF_ATP_BIOSYNTHETIC_PROCESS	GOBP_REGULATION_OF_ATP_BIOSYNTHETIC_PROCESS	GOBP_REGULATION_OF_ATP_BIOSYNTHETIC_PROCESS	1/171	23/17872	0.198492809827702	0.422443615304648	0.358840497884908	TMSB4X	1
GOBP_RESPONSE_TO_LECTIN	GOBP_RESPONSE_TO_LECTIN	GOBP_RESPONSE_TO_LECTIN	1/171	23/17872	0.198492809827702	0.422443615304648	0.358840497884908	TYROBP	1
GOBP_SRP_DEPENDENT_COTRANSLATIONAL_PROTEIN_TARGETING_TO_MEMBRANE	GOBP_SRP_DEPENDENT_COTRANSLATIONAL_PROTEIN_TARGETING_TO_MEMBRANE	GOBP_SRP_DEPENDENT_COTRANSLATIONAL_PROTEIN_TARGETING_TO_MEMBRANE	1/171	23/17872	0.198492809827702	0.422443615304648	0.358840497884908	SRP14	1
GOBP_LIPID_STORAGE	GOBP_LIPID_STORAGE	GOBP_LIPID_STORAGE	2/171	86/17872	0.198968253721702	0.422608570904894	0.358980617767365	APOE/CD36	2
GOBP_MONOSACCHARIDE_BIOSYNTHETIC_PROCESS	GOBP_MONOSACCHARIDE_BIOSYNTHETIC_PROCESS	GOBP_MONOSACCHARIDE_BIOSYNTHETIC_PROCESS	2/171	86/17872	0.198968253721702	0.422608570904894	0.358980617767365	RANBP2/TPI1	2
GOBP_POSITIVE_REGULATION_OF_SYNAPTIC_TRANSMISSION	GOBP_POSITIVE_REGULATION_OF_SYNAPTIC_TRANSMISSION	GOBP_POSITIVE_REGULATION_OF_SYNAPTIC_TRANSMISSION	3/171	161/17872	0.200264411120089	0.424936672546523	0.360958200388909	TYROBP/APOE/STX3	3
GOBP_NEGATIVE_REGULATION_OF_AUTOPHAGY	GOBP_NEGATIVE_REGULATION_OF_AUTOPHAGY	GOBP_NEGATIVE_REGULATION_OF_AUTOPHAGY	2/171	87/17872	0.202451760800318	0.425980894791916	0.361845204516475	TSPO/USP36	2
GOBP_REGULATION_OF_NUCLEOTIDE_METABOLIC_PROCESS	GOBP_REGULATION_OF_NUCLEOTIDE_METABOLIC_PROCESS	GOBP_REGULATION_OF_NUCLEOTIDE_METABOLIC_PROCESS	2/171	87/17872	0.202451760800318	0.425980894791916	0.361845204516475	TMSB4X/HIF1A	2
GOBP_FATTY_ACID_BIOSYNTHETIC_PROCESS	GOBP_FATTY_ACID_BIOSYNTHETIC_PROCESS	GOBP_FATTY_ACID_BIOSYNTHETIC_PROCESS	3/171	162/17872	0.202716844372551	0.425980894791916	0.361845204516475	APOC1/FABP5/GSTP1	3
GOBP_MEMBRANE_FUSION	GOBP_MEMBRANE_FUSION	GOBP_MEMBRANE_FUSION	3/171	163/17872	0.205176378049351	0.425980894791916	0.361845204516475	VAMP8/STX3/CD9	3
GOBP_POSITIVE_REGULATION_OF_CELL_GROWTH	GOBP_POSITIVE_REGULATION_OF_CELL_GROWTH	GOBP_POSITIVE_REGULATION_OF_CELL_GROWTH	3/171	163/17872	0.205176378049351	0.425980894791916	0.361845204516475	CYBA/S100A9/S100A8	3
GOBP_REGULATION_OF_RHO_PROTEIN_SIGNAL_TRANSDUCTION	GOBP_REGULATION_OF_RHO_PROTEIN_SIGNAL_TRANSDUCTION	GOBP_REGULATION_OF_RHO_PROTEIN_SIGNAL_TRANSDUCTION	2/171	88/17872	0.205942287230764	0.425980894791916	0.361845204516475	APOE/ARHGDIB	2
GOBP_PURINE_CONTAINING_COMPOUND_METABOLIC_PROCESS	GOBP_PURINE_CONTAINING_COMPOUND_METABOLIC_PROCESS	GOBP_PURINE_CONTAINING_COMPOUND_METABOLIC_PROCESS	6/171	414/17872	0.206131347383614	0.425980894791916	0.361845204516475	TMSB4X/HIF1A/ATP5MG/ALDOA/PPT1/TPI1	6
GOBP_ASTROCYTE_ACTIVATION	GOBP_ASTROCYTE_ACTIVATION	GOBP_ASTROCYTE_ACTIVATION	1/171	24/17872	0.206171544183658	0.425980894791916	0.361845204516475	GRN	1
GOBP_CELLULAR_RESPONSE_TO_ZINC_ION	GOBP_CELLULAR_RESPONSE_TO_ZINC_ION	GOBP_CELLULAR_RESPONSE_TO_ZINC_ION	1/171	24/17872	0.206171544183658	0.425980894791916	0.361845204516475	TSPO	1
GOBP_EMBRYONIC_HEMOPOIESIS	GOBP_EMBRYONIC_HEMOPOIESIS	GOBP_EMBRYONIC_HEMOPOIESIS	1/171	24/17872	0.206171544183658	0.425980894791916	0.361845204516475	HIF1A	1
GOBP_FC_EPSILON_RECEPTOR_SIGNALING_PATHWAY	GOBP_FC_EPSILON_RECEPTOR_SIGNALING_PATHWAY	GOBP_FC_EPSILON_RECEPTOR_SIGNALING_PATHWAY	1/171	24/17872	0.206171544183658	0.425980894791916	0.361845204516475	FCER1G	1
GOBP_NEGATIVE_REGULATION_OF_FIBROBLAST_GROWTH_FACTOR_RECEPTOR_SIGNALING_PATHWAY	GOBP_NEGATIVE_REGULATION_OF_FIBROBLAST_GROWTH_FACTOR_RECEPTOR_SIGNALING_PATHWAY	GOBP_NEGATIVE_REGULATION_OF_FIBROBLAST_GROWTH_FACTOR_RECEPTOR_SIGNALING_PATHWAY	1/171	24/17872	0.206171544183658	0.425980894791916	0.361845204516475	SULF2	1
GOBP_NEUROTRANSMITTER_RECEPTOR_TRANSPORT	GOBP_NEUROTRANSMITTER_RECEPTOR_TRANSPORT	GOBP_NEUROTRANSMITTER_RECEPTOR_TRANSPORT	1/171	24/17872	0.206171544183658	0.425980894791916	0.361845204516475	STX3	1
GOBP_POSITIVE_REGULATION_OF_COAGULATION	GOBP_POSITIVE_REGULATION_OF_COAGULATION	GOBP_POSITIVE_REGULATION_OF_COAGULATION	1/171	24/17872	0.206171544183658	0.425980894791916	0.361845204516475	CD36	1
GOBP_POSITIVE_REGULATION_OF_LEUKOCYTE_ADHESION_TO_VASCULAR_ENDOTHELIAL_CELL	GOBP_POSITIVE_REGULATION_OF_LEUKOCYTE_ADHESION_TO_VASCULAR_ENDOTHELIAL_CELL	GOBP_POSITIVE_REGULATION_OF_LEUKOCYTE_ADHESION_TO_VASCULAR_ENDOTHELIAL_CELL	1/171	24/17872	0.206171544183658	0.425980894791916	0.361845204516475	ITGB2	1
GOBP_POSITIVE_REGULATION_OF_NEUROBLAST_PROLIFERATION	GOBP_POSITIVE_REGULATION_OF_NEUROBLAST_PROLIFERATION	GOBP_POSITIVE_REGULATION_OF_NEUROBLAST_PROLIFERATION	1/171	24/17872	0.206171544183658	0.425980894791916	0.361845204516475	HIF1A	1
GOBP_POSITIVE_REGULATION_OF_NUCLEOTIDE_BIOSYNTHETIC_PROCESS	GOBP_POSITIVE_REGULATION_OF_NUCLEOTIDE_BIOSYNTHETIC_PROCESS	GOBP_POSITIVE_REGULATION_OF_NUCLEOTIDE_BIOSYNTHETIC_PROCESS	1/171	24/17872	0.206171544183658	0.425980894791916	0.361845204516475	TMSB4X	1
GOBP_POSITIVE_REGULATION_OF_OSTEOCLAST_DIFFERENTIATION	GOBP_POSITIVE_REGULATION_OF_OSTEOCLAST_DIFFERENTIATION	GOBP_POSITIVE_REGULATION_OF_OSTEOCLAST_DIFFERENTIATION	1/171	24/17872	0.206171544183658	0.425980894791916	0.361845204516475	TYROBP	1
GOBP_POSITIVE_REGULATION_OF_SYNCYTIUM_FORMATION_BY_PLASMA_MEMBRANE_FUSION	GOBP_POSITIVE_REGULATION_OF_SYNCYTIUM_FORMATION_BY_PLASMA_MEMBRANE_FUSION	GOBP_POSITIVE_REGULATION_OF_SYNCYTIUM_FORMATION_BY_PLASMA_MEMBRANE_FUSION	1/171	24/17872	0.206171544183658	0.425980894791916	0.361845204516475	TYROBP	1
GOBP_POSITIVE_REGULATION_OF_TRANSCRIPTION_FROM_RNA_POLYMERASE_II_PROMOTER_IN_RESPONSE_TO_STRESS	GOBP_POSITIVE_REGULATION_OF_TRANSCRIPTION_FROM_RNA_POLYMERASE_II_PROMOTER_IN_RESPONSE_TO_STRESS	GOBP_POSITIVE_REGULATION_OF_TRANSCRIPTION_FROM_RNA_POLYMERASE_II_PROMOTER_IN_RESPONSE_TO_STRESS	1/171	24/17872	0.206171544183658	0.425980894791916	0.361845204516475	HIF1A	1
GOBP_POSITIVE_REGULATION_OF_TRANSCRIPTION_FROM_RNA_POLYMERASE_II_PROMOTER_INVOLVED_IN_CELLULAR_RESPONSE_TO_CHEMICAL_STIMULUS	GOBP_POSITIVE_REGULATION_OF_TRANSCRIPTION_FROM_RNA_POLYMERASE_II_PROMOTER_INVOLVED_IN_CELLULAR_RESPONSE_TO_CHEMICAL_STIMULUS	GOBP_POSITIVE_REGULATION_OF_TRANSCRIPTION_FROM_RNA_POLYMERASE_II_PROMOTER_INVOLVED_IN_CELLULAR_RESPONSE_TO_CHEMICAL_STIMULUS	1/171	24/17872	0.206171544183658	0.425980894791916	0.361845204516475	HIF1A	1
GOBP_PROTEIN_LOCALIZATION_TO_ENDOSOME	GOBP_PROTEIN_LOCALIZATION_TO_ENDOSOME	GOBP_PROTEIN_LOCALIZATION_TO_ENDOSOME	1/171	24/17872	0.206171544183658	0.425980894791916	0.361845204516475	EZR	1
GOBP_REGULATION_OF_CHOLESTEROL_BIOSYNTHETIC_PROCESS	GOBP_REGULATION_OF_CHOLESTEROL_BIOSYNTHETIC_PROCESS	GOBP_REGULATION_OF_CHOLESTEROL_BIOSYNTHETIC_PROCESS	1/171	24/17872	0.206171544183658	0.425980894791916	0.361845204516475	APOE	1
GOBP_REGULATION_OF_ENDOTHELIAL_CELL_CHEMOTAXIS	GOBP_REGULATION_OF_ENDOTHELIAL_CELL_CHEMOTAXIS	GOBP_REGULATION_OF_ENDOTHELIAL_CELL_CHEMOTAXIS	1/171	24/17872	0.206171544183658	0.425980894791916	0.361845204516475	TMSB4X	1
GOBP_REGULATION_OF_MACROPHAGE_DIFFERENTIATION	GOBP_REGULATION_OF_MACROPHAGE_DIFFERENTIATION	GOBP_REGULATION_OF_MACROPHAGE_DIFFERENTIATION	1/171	24/17872	0.206171544183658	0.425980894791916	0.361845204516475	C1QC	1
GOBP_REGULATION_OF_MEMBRANE_PROTEIN_ECTODOMAIN_PROTEOLYSIS	GOBP_REGULATION_OF_MEMBRANE_PROTEIN_ECTODOMAIN_PROTEOLYSIS	GOBP_REGULATION_OF_MEMBRANE_PROTEIN_ECTODOMAIN_PROTEOLYSIS	1/171	24/17872	0.206171544183658	0.425980894791916	0.361845204516475	APOE	1
GOBP_REGULATION_OF_SYSTEMIC_ARTERIAL_BLOOD_PRESSURE_BY_RENIN_ANGIOTENSIN	GOBP_REGULATION_OF_SYSTEMIC_ARTERIAL_BLOOD_PRESSURE_BY_RENIN_ANGIOTENSIN	GOBP_REGULATION_OF_SYSTEMIC_ARTERIAL_BLOOD_PRESSURE_BY_RENIN_ANGIOTENSIN	1/171	24/17872	0.206171544183658	0.425980894791916	0.361845204516475	CYBA	1
GOBP_CELLULAR_RESPONSE_TO_EXTRACELLULAR_STIMULUS	GOBP_CELLULAR_RESPONSE_TO_EXTRACELLULAR_STIMULUS	GOBP_CELLULAR_RESPONSE_TO_EXTRACELLULAR_STIMULUS	4/171	245/17872	0.208083978890171	0.42951445205318	0.364846749340446	AIF1/GABARAP/HSPA8/MAP1LC3B	4
GOBP_LEUKOCYTE_HOMEOSTASIS	GOBP_LEUKOCYTE_HOMEOSTASIS	GOBP_LEUKOCYTE_HOMEOSTASIS	2/171	89/17872	0.209439383180606	0.431055474685665	0.366155755580945	HIF1A/RPS6	2
GOBP_NEURON_PROJECTION_ORGANIZATION	GOBP_NEURON_PROJECTION_ORGANIZATION	GOBP_NEURON_PROJECTION_ORGANIZATION	2/171	89/17872	0.209439383180606	0.431055474685665	0.366155755580945	APOE/CFL1	2
GOBP_PIGMENT_METABOLIC_PROCESS	GOBP_PIGMENT_METABOLIC_PROCESS	GOBP_PIGMENT_METABOLIC_PROCESS	2/171	89/17872	0.209439383180606	0.431055474685665	0.366155755580945	TSPO/BLVRB	2
GOBP_RESPONSE_TO_STEROID_HORMONE	GOBP_RESPONSE_TO_STEROID_HORMONE	GOBP_RESPONSE_TO_STEROID_HORMONE	5/171	330/17872	0.209720582195754	0.431216376170165	0.366292431735387	CYBA/TSPO/AIF1/RPL27/HSPA8	5
GOBP_CELLULAR_RESPONSE_TO_OXYGEN_LEVELS	GOBP_CELLULAR_RESPONSE_TO_OXYGEN_LEVELS	GOBP_CELLULAR_RESPONSE_TO_OXYGEN_LEVELS	3/171	165/17872	0.210116067762536	0.431611729136969	0.366628260353239	HIF1A/CARD16/ATP6V1G1	3
GOBP_CELLULAR_RESPONSE_TO_HYDROGEN_PEROXIDE	GOBP_CELLULAR_RESPONSE_TO_HYDROGEN_PEROXIDE	GOBP_CELLULAR_RESPONSE_TO_HYDROGEN_PEROXIDE	2/171	90/17872	0.212942606686575	0.432852854514669	0.367682521874389	RPS3/RACK1	2
GOBP_DEFENSE_RESPONSE_TO_GRAM_NEGATIVE_BACTERIUM	GOBP_DEFENSE_RESPONSE_TO_GRAM_NEGATIVE_BACTERIUM	GOBP_DEFENSE_RESPONSE_TO_GRAM_NEGATIVE_BACTERIUM	2/171	90/17872	0.212942606686575	0.432852854514669	0.367682521874389	PYCARD/RPS19	2
GOBP_AMELOGENESIS	GOBP_AMELOGENESIS	GOBP_AMELOGENESIS	1/171	25/17872	0.213777139541379	0.432852854514669	0.367682521874389	FAM20A	1
GOBP_CELLULAR_RESPONSE_TO_OXYGEN_RADICAL	GOBP_CELLULAR_RESPONSE_TO_OXYGEN_RADICAL	GOBP_CELLULAR_RESPONSE_TO_OXYGEN_RADICAL	1/171	25/17872	0.213777139541379	0.432852854514669	0.367682521874389	CD36	1
GOBP_FATTY_ACYL_COA_BIOSYNTHETIC_PROCESS	GOBP_FATTY_ACYL_COA_BIOSYNTHETIC_PROCESS	GOBP_FATTY_ACYL_COA_BIOSYNTHETIC_PROCESS	1/171	25/17872	0.213777139541379	0.432852854514669	0.367682521874389	PPT1	1
GOBP_INFLAMMASOME_COMPLEX_ASSEMBLY	GOBP_INFLAMMASOME_COMPLEX_ASSEMBLY	GOBP_INFLAMMASOME_COMPLEX_ASSEMBLY	1/171	25/17872	0.213777139541379	0.432852854514669	0.367682521874389	CD36	1
GOBP_MEMBRANE_RAFT_ORGANIZATION	GOBP_MEMBRANE_RAFT_ORGANIZATION	GOBP_MEMBRANE_RAFT_ORGANIZATION	1/171	25/17872	0.213777139541379	0.432852854514669	0.367682521874389	PPT1	1
GOBP_MODULATION_OF_PROCESS_OF_ANOTHER_ORGANISM	GOBP_MODULATION_OF_PROCESS_OF_ANOTHER_ORGANISM	GOBP_MODULATION_OF_PROCESS_OF_ANOTHER_ORGANISM	1/171	25/17872	0.213777139541379	0.432852854514669	0.367682521874389	S100A9	1
GOBP_MYOBLAST_PROLIFERATION	GOBP_MYOBLAST_PROLIFERATION	GOBP_MYOBLAST_PROLIFERATION	1/171	25/17872	0.213777139541379	0.432852854514669	0.367682521874389	GPX1	1
GOBP_NEGATIVE_REGULATION_OF_T_CELL_RECEPTOR_SIGNALING_PATHWAY	GOBP_NEGATIVE_REGULATION_OF_T_CELL_RECEPTOR_SIGNALING_PATHWAY	GOBP_NEGATIVE_REGULATION_OF_T_CELL_RECEPTOR_SIGNALING_PATHWAY	1/171	25/17872	0.213777139541379	0.432852854514669	0.367682521874389	EZR	1
GOBP_POSITIVE_REGULATION_OF_INTERLEUKIN_4_PRODUCTION	GOBP_POSITIVE_REGULATION_OF_INTERLEUKIN_4_PRODUCTION	GOBP_POSITIVE_REGULATION_OF_INTERLEUKIN_4_PRODUCTION	1/171	25/17872	0.213777139541379	0.432852854514669	0.367682521874389	FCER1G	1
GOBP_POSITIVE_REGULATION_OF_NATURAL_KILLER_CELL_ACTIVATION	GOBP_POSITIVE_REGULATION_OF_NATURAL_KILLER_CELL_ACTIVATION	GOBP_POSITIVE_REGULATION_OF_NATURAL_KILLER_CELL_ACTIVATION	1/171	25/17872	0.213777139541379	0.432852854514669	0.367682521874389	TYROBP	1
GOBP_PURINE_CONTAINING_COMPOUND_TRANSMEMBRANE_TRANSPORT	GOBP_PURINE_CONTAINING_COMPOUND_TRANSMEMBRANE_TRANSPORT	GOBP_PURINE_CONTAINING_COMPOUND_TRANSMEMBRANE_TRANSPORT	1/171	25/17872	0.213777139541379	0.432852854514669	0.367682521874389	SLC25A6	1
GOBP_RENAL_SYSTEM_PROCESS_INVOLVED_IN_REGULATION_OF_SYSTEMIC_ARTERIAL_BLOOD_PRESSURE	GOBP_RENAL_SYSTEM_PROCESS_INVOLVED_IN_REGULATION_OF_SYSTEMIC_ARTERIAL_BLOOD_PRESSURE	GOBP_RENAL_SYSTEM_PROCESS_INVOLVED_IN_REGULATION_OF_SYSTEMIC_ARTERIAL_BLOOD_PRESSURE	1/171	25/17872	0.213777139541379	0.432852854514669	0.367682521874389	CYBA	1
GOBP_SYNAPSE_MATURATION	GOBP_SYNAPSE_MATURATION	GOBP_SYNAPSE_MATURATION	1/171	25/17872	0.213777139541379	0.432852854514669	0.367682521874389	PFN1	1
GOBP_REGULATION_OF_INTRACELLULAR_TRANSPORT	GOBP_REGULATION_OF_INTRACELLULAR_TRANSPORT	GOBP_REGULATION_OF_INTRACELLULAR_TRANSPORT	5/171	333/17872	0.214839132912237	0.434588874576754	0.369157166728396	OAZ1/ITGB2/USP36/CD36/EZR	5
GOBP_POSITIVE_REGULATION_OF_CELLULAR_AMIDE_METABOLIC_PROCESS	GOBP_POSITIVE_REGULATION_OF_CELLULAR_AMIDE_METABOLIC_PROCESS	GOBP_POSITIVE_REGULATION_OF_CELLULAR_AMIDE_METABOLIC_PROCESS	3/171	167/17872	0.215082130301001	0.434666455527426	0.369223067089904	RPS9/YBX1/SERP1	3
GOBP_PEPTIDE_TRANSPORT	GOBP_PEPTIDE_TRANSPORT	GOBP_PEPTIDE_TRANSPORT	4/171	249/17872	0.216069043470773	0.436051069327636	0.370399213414396	HIF1A/S100A8/SELENOT/SERP1	4
GOBP_DENDRITIC_SPINE_DEVELOPMENT	GOBP_DENDRITIC_SPINE_DEVELOPMENT	GOBP_DENDRITIC_SPINE_DEVELOPMENT	2/171	91/17872	0.216451523546673	0.436051069327636	0.370399213414396	APOE/CFL1	2
GOBP_SMOOTH_MUSCLE_CELL_MIGRATION	GOBP_SMOOTH_MUSCLE_CELL_MIGRATION	GOBP_SMOOTH_MUSCLE_CELL_MIGRATION	2/171	91/17872	0.216451523546673	0.436051069327636	0.370399213414396	AIF1/S100A11	2
GOBP_NEGATIVE_REGULATION_OF_RESPONSE_TO_CYTOKINE_STIMULUS	GOBP_NEGATIVE_REGULATION_OF_RESPONSE_TO_CYTOKINE_STIMULUS	GOBP_NEGATIVE_REGULATION_OF_RESPONSE_TO_CYTOKINE_STIMULUS	2/171	92/17872	0.219965707213599	0.436051069327636	0.370399213414396	CARD16/GSTP1	2
GOBP_NEGATIVE_REGULATION_OF_RESPONSE_TO_WOUNDING	GOBP_NEGATIVE_REGULATION_OF_RESPONSE_TO_WOUNDING	GOBP_NEGATIVE_REGULATION_OF_RESPONSE_TO_WOUNDING	2/171	92/17872	0.219965707213599	0.436051069327636	0.370399213414396	APOE/CD9	2
GOBP_REGULATION_OF_FATTY_ACID_METABOLIC_PROCESS	GOBP_REGULATION_OF_FATTY_ACID_METABOLIC_PROCESS	GOBP_REGULATION_OF_FATTY_ACID_METABOLIC_PROCESS	2/171	92/17872	0.219965707213599	0.436051069327636	0.370399213414396	APOC1/FABP5	2
GOBP_REGULATION_OF_LIPASE_ACTIVITY	GOBP_REGULATION_OF_LIPASE_ACTIVITY	GOBP_REGULATION_OF_LIPASE_ACTIVITY	2/171	92/17872	0.219965707213599	0.436051069327636	0.370399213414396	APOC1/PPT1	2
GOBP_ATP_SYNTHESIS_COUPLED_PROTON_TRANSPORT	GOBP_ATP_SYNTHESIS_COUPLED_PROTON_TRANSPORT	GOBP_ATP_SYNTHESIS_COUPLED_PROTON_TRANSPORT	1/171	26/17872	0.221310288481729	0.436051069327636	0.370399213414396	ATP5MG	1
GOBP_BARBED_END_ACTIN_FILAMENT_CAPPING	GOBP_BARBED_END_ACTIN_FILAMENT_CAPPING	GOBP_BARBED_END_ACTIN_FILAMENT_CAPPING	1/171	26/17872	0.221310288481729	0.436051069327636	0.370399213414396	CAPG	1
GOBP_INNERVATION	GOBP_INNERVATION	GOBP_INNERVATION	1/171	26/17872	0.221310288481729	0.436051069327636	0.370399213414396	SULF2	1
GOBP_IRON_SULFUR_CLUSTER_ASSEMBLY	GOBP_IRON_SULFUR_CLUSTER_ASSEMBLY	GOBP_IRON_SULFUR_CLUSTER_ASSEMBLY	1/171	26/17872	0.221310288481729	0.436051069327636	0.370399213414396	CIAO2B	1
GOBP_MAMMARY_GLAND_EPITHELIAL_CELL_PROLIFERATION	GOBP_MAMMARY_GLAND_EPITHELIAL_CELL_PROLIFERATION	GOBP_MAMMARY_GLAND_EPITHELIAL_CELL_PROLIFERATION	1/171	26/17872	0.221310288481729	0.436051069327636	0.370399213414396	GPX1	1
GOBP_NEGATIVE_REGULATION_OF_CHEMOKINE_PRODUCTION	GOBP_NEGATIVE_REGULATION_OF_CHEMOKINE_PRODUCTION	GOBP_NEGATIVE_REGULATION_OF_CHEMOKINE_PRODUCTION	1/171	26/17872	0.221310288481729	0.436051069327636	0.370399213414396	GSTP1	1
GOBP_NEGATIVE_REGULATION_OF_LIPID_CATABOLIC_PROCESS	GOBP_NEGATIVE_REGULATION_OF_LIPID_CATABOLIC_PROCESS	GOBP_NEGATIVE_REGULATION_OF_LIPID_CATABOLIC_PROCESS	1/171	26/17872	0.221310288481729	0.436051069327636	0.370399213414396	APOC1	1
GOBP_NEGATIVE_REGULATION_OF_VIRAL_LIFE_CYCLE	GOBP_NEGATIVE_REGULATION_OF_VIRAL_LIFE_CYCLE	GOBP_NEGATIVE_REGULATION_OF_VIRAL_LIFE_CYCLE	1/171	26/17872	0.221310288481729	0.436051069327636	0.370399213414396	FCN1	1
GOBP_PLASMA_MEMBRANE_FUSION	GOBP_PLASMA_MEMBRANE_FUSION	GOBP_PLASMA_MEMBRANE_FUSION	1/171	26/17872	0.221310288481729	0.436051069327636	0.370399213414396	CD9	1
GOBP_POLARIZED_EPITHELIAL_CELL_DIFFERENTIATION	GOBP_POLARIZED_EPITHELIAL_CELL_DIFFERENTIATION	GOBP_POLARIZED_EPITHELIAL_CELL_DIFFERENTIATION	1/171	26/17872	0.221310288481729	0.436051069327636	0.370399213414396	EZR	1
GOBP_POSITIVE_REGULATION_OF_ANTIGEN_RECEPTOR_MEDIATED_SIGNALING_PATHWAY	GOBP_POSITIVE_REGULATION_OF_ANTIGEN_RECEPTOR_MEDIATED_SIGNALING_PATHWAY	GOBP_POSITIVE_REGULATION_OF_ANTIGEN_RECEPTOR_MEDIATED_SIGNALING_PATHWAY	1/171	26/17872	0.221310288481729	0.436051069327636	0.370399213414396	RPS3	1
GOBP_POSITIVE_REGULATION_OF_RELEASE_OF_CYTOCHROME_C_FROM_MITOCHONDRIA	GOBP_POSITIVE_REGULATION_OF_RELEASE_OF_CYTOCHROME_C_FROM_MITOCHONDRIA	GOBP_POSITIVE_REGULATION_OF_RELEASE_OF_CYTOCHROME_C_FROM_MITOCHONDRIA	1/171	26/17872	0.221310288481729	0.436051069327636	0.370399213414396	PYCARD	1
GOBP_POSITIVE_REGULATION_OF_T_CELL_CYTOKINE_PRODUCTION	GOBP_POSITIVE_REGULATION_OF_T_CELL_CYTOKINE_PRODUCTION	GOBP_POSITIVE_REGULATION_OF_T_CELL_CYTOKINE_PRODUCTION	1/171	26/17872	0.221310288481729	0.436051069327636	0.370399213414396	MALT1	1
GOBP_REGULATION_OF_ESTABLISHMENT_OR_MAINTENANCE_OF_CELL_POLARITY	GOBP_REGULATION_OF_ESTABLISHMENT_OR_MAINTENANCE_OF_CELL_POLARITY	GOBP_REGULATION_OF_ESTABLISHMENT_OR_MAINTENANCE_OF_CELL_POLARITY	1/171	26/17872	0.221310288481729	0.436051069327636	0.370399213414396	RACK1	1
GOBP_REGULATION_OF_LYMPHOCYTE_CHEMOTAXIS	GOBP_REGULATION_OF_LYMPHOCYTE_CHEMOTAXIS	GOBP_REGULATION_OF_LYMPHOCYTE_CHEMOTAXIS	1/171	26/17872	0.221310288481729	0.436051069327636	0.370399213414396	OXSR1	1
GOBP_REGULATION_OF_NUCLEAR_TRANSCRIBED_MRNA_CATABOLIC_PROCESS_DEADENYLATION_DEPENDENT_DECAY	GOBP_REGULATION_OF_NUCLEAR_TRANSCRIBED_MRNA_CATABOLIC_PROCESS_DEADENYLATION_DEPENDENT_DECAY	GOBP_REGULATION_OF_NUCLEAR_TRANSCRIBED_MRNA_CATABOLIC_PROCESS_DEADENYLATION_DEPENDENT_DECAY	1/171	26/17872	0.221310288481729	0.436051069327636	0.370399213414396	YBX1	1
GOBP_REGULATION_OF_T_HELPER_17_TYPE_IMMUNE_RESPONSE	GOBP_REGULATION_OF_T_HELPER_17_TYPE_IMMUNE_RESPONSE	GOBP_REGULATION_OF_T_HELPER_17_TYPE_IMMUNE_RESPONSE	1/171	26/17872	0.221310288481729	0.436051069327636	0.370399213414396	MALT1	1
GOBP_RESPIRATORY_CHAIN_COMPLEX_IV_ASSEMBLY	GOBP_RESPIRATORY_CHAIN_COMPLEX_IV_ASSEMBLY	GOBP_RESPIRATORY_CHAIN_COMPLEX_IV_ASSEMBLY	1/171	26/17872	0.221310288481729	0.436051069327636	0.370399213414396	COX14	1
GOBP_RESPONSE_TO_INCREASED_OXYGEN_LEVELS	GOBP_RESPONSE_TO_INCREASED_OXYGEN_LEVELS	GOBP_RESPONSE_TO_INCREASED_OXYGEN_LEVELS	1/171	26/17872	0.221310288481729	0.436051069327636	0.370399213414396	ATP6V1G1	1
GOBP_SYNAPTIC_VESICLE_MEMBRANE_ORGANIZATION	GOBP_SYNAPTIC_VESICLE_MEMBRANE_ORGANIZATION	GOBP_SYNAPTIC_VESICLE_MEMBRANE_ORGANIZATION	1/171	26/17872	0.221310288481729	0.436051069327636	0.370399213414396	STX3	1
GOBP_REGULATION_OF_PROTEIN_SECRETION	GOBP_REGULATION_OF_PROTEIN_SECRETION	GOBP_REGULATION_OF_PROTEIN_SECRETION	4/171	252/17872	0.222112929945222	0.437226935313857	0.371398040999084	HIF1A/APOE/EZR/SERP1	4
GOBP_STRESS_ACTIVATED_PROTEIN_KINASE_SIGNALING_CASCADE	GOBP_STRESS_ACTIVATED_PROTEIN_KINASE_SIGNALING_CASCADE	GOBP_STRESS_ACTIVATED_PROTEIN_KINASE_SIGNALING_CASCADE	4/171	253/17872	0.224137594325987	0.440803935507774	0.374436487987078	PYCARD/EZR/MAP4K3/GSTP1	4
GOBP_POSITIVE_REGULATION_OF_BINDING	GOBP_POSITIVE_REGULATION_OF_BINDING	GOBP_POSITIVE_REGULATION_OF_BINDING	3/171	171/17872	0.225088039391105	0.442062725326819	0.375505754391004	APOE/RPL11/EDF1	3
GOBP_SULFUR_COMPOUND_METABOLIC_PROCESS	GOBP_SULFUR_COMPOUND_METABOLIC_PROCESS	GOBP_SULFUR_COMPOUND_METABOLIC_PROCESS	5/171	339/17872	0.22519391186611	0.442062725326819	0.375505754391004	GPX1/EEF1G/CIAO2B/PPT1/GSTP1	5
GOBP_POSITIVE_REGULATION_OF_DNA_REPAIR	GOBP_POSITIVE_REGULATION_OF_DNA_REPAIR	GOBP_POSITIVE_REGULATION_OF_DNA_REPAIR	2/171	94/17872	0.227008206421939	0.442139255766656	0.375570762406605	ACTB/RPS3	2
GOBP_POSITIVE_REGULATION_OF_LEUKOCYTE_CHEMOTAXIS	GOBP_POSITIVE_REGULATION_OF_LEUKOCYTE_CHEMOTAXIS	GOBP_POSITIVE_REGULATION_OF_LEUKOCYTE_CHEMOTAXIS	2/171	94/17872	0.227008206421939	0.442139255766656	0.375570762406605	AIF1/OXSR1	2
GOBP_ERK1_AND_ERK2_CASCADE	GOBP_ERK1_AND_ERK2_CASCADE	GOBP_ERK1_AND_ERK2_CASCADE	5/171	341/17872	0.228678837721608	0.442139255766656	0.375570762406605	APOE/PYCARD/CD36/EZR/GSTP1	5
GOBP_POSITIVE_REGULATION_OF_CELL_PROJECTION_ORGANIZATION	GOBP_POSITIVE_REGULATION_OF_CELL_PROJECTION_ORGANIZATION	GOBP_POSITIVE_REGULATION_OF_CELL_PROJECTION_ORGANIZATION	5/171	341/17872	0.228678837721608	0.442139255766656	0.375570762406605	PFN1/GRN/APOE/S100A9/ARPC2	5
GOBP_ADRENAL_GLAND_DEVELOPMENT	GOBP_ADRENAL_GLAND_DEVELOPMENT	GOBP_ADRENAL_GLAND_DEVELOPMENT	1/171	27/17872	0.228771677065704	0.442139255766656	0.375570762406605	TSPO	1
GOBP_ESTABLISHMENT_OR_MAINTENANCE_OF_MONOPOLAR_CELL_POLARITY	GOBP_ESTABLISHMENT_OR_MAINTENANCE_OF_MONOPOLAR_CELL_POLARITY	GOBP_ESTABLISHMENT_OR_MAINTENANCE_OF_MONOPOLAR_CELL_POLARITY	1/171	27/17872	0.228771677065704	0.442139255766656	0.375570762406605	EZR	1
GOBP_EXPLORATION_BEHAVIOR	GOBP_EXPLORATION_BEHAVIOR	GOBP_EXPLORATION_BEHAVIOR	1/171	27/17872	0.228771677065704	0.442139255766656	0.375570762406605	APOE	1
GOBP_GLUTAMINE_FAMILY_AMINO_ACID_CATABOLIC_PROCESS	GOBP_GLUTAMINE_FAMILY_AMINO_ACID_CATABOLIC_PROCESS	GOBP_GLUTAMINE_FAMILY_AMINO_ACID_CATABOLIC_PROCESS	1/171	27/17872	0.228771677065704	0.442139255766656	0.375570762406605	DDAH2	1
GOBP_GLYCOPROTEIN_CATABOLIC_PROCESS	GOBP_GLYCOPROTEIN_CATABOLIC_PROCESS	GOBP_GLYCOPROTEIN_CATABOLIC_PROCESS	1/171	27/17872	0.228771677065704	0.442139255766656	0.375570762406605	CST3	1
GOBP_NEGATIVE_REGULATION_OF_CELL_AGING	GOBP_NEGATIVE_REGULATION_OF_CELL_AGING	GOBP_NEGATIVE_REGULATION_OF_CELL_AGING	1/171	27/17872	0.228771677065704	0.442139255766656	0.375570762406605	YBX1	1
GOBP_NEGATIVE_REGULATION_OF_PROTEIN_LOCALIZATION_TO_CELL_PERIPHERY	GOBP_NEGATIVE_REGULATION_OF_PROTEIN_LOCALIZATION_TO_CELL_PERIPHERY	GOBP_NEGATIVE_REGULATION_OF_PROTEIN_LOCALIZATION_TO_CELL_PERIPHERY	1/171	27/17872	0.228771677065704	0.442139255766656	0.375570762406605	TMEM59	1
GOBP_NEGATIVE_REGULATION_OF_RESPONSE_TO_OXIDATIVE_STRESS	GOBP_NEGATIVE_REGULATION_OF_RESPONSE_TO_OXIDATIVE_STRESS	GOBP_NEGATIVE_REGULATION_OF_RESPONSE_TO_OXIDATIVE_STRESS	1/171	27/17872	0.228771677065704	0.442139255766656	0.375570762406605	RACK1	1
GOBP_POSITIVE_REGULATION_OF_CYTOKINE_PRODUCTION_INVOLVED_IN_INFLAMMATORY_RESPONSE	GOBP_POSITIVE_REGULATION_OF_CYTOKINE_PRODUCTION_INVOLVED_IN_INFLAMMATORY_RESPONSE	GOBP_POSITIVE_REGULATION_OF_CYTOKINE_PRODUCTION_INVOLVED_IN_INFLAMMATORY_RESPONSE	1/171	27/17872	0.228771677065704	0.442139255766656	0.375570762406605	HIF1A	1
GOBP_POSITIVE_REGULATION_OF_INSULIN_SECRETION_INVOLVED_IN_CELLULAR_RESPONSE_TO_GLUCOSE_STIMULUS	GOBP_POSITIVE_REGULATION_OF_INSULIN_SECRETION_INVOLVED_IN_CELLULAR_RESPONSE_TO_GLUCOSE_STIMULUS	GOBP_POSITIVE_REGULATION_OF_INSULIN_SECRETION_INVOLVED_IN_CELLULAR_RESPONSE_TO_GLUCOSE_STIMULUS	1/171	27/17872	0.228771677065704	0.442139255766656	0.375570762406605	HIF1A	1
GOBP_POSITIVE_REGULATION_OF_LIPID_STORAGE	GOBP_POSITIVE_REGULATION_OF_LIPID_STORAGE	GOBP_POSITIVE_REGULATION_OF_LIPID_STORAGE	1/171	27/17872	0.228771677065704	0.442139255766656	0.375570762406605	CD36	1
GOBP_STEROID_CATABOLIC_PROCESS	GOBP_STEROID_CATABOLIC_PROCESS	GOBP_STEROID_CATABOLIC_PROCESS	1/171	27/17872	0.228771677065704	0.442139255766656	0.375570762406605	APOE	1
GOBP_TOOTH_MINERALIZATION	GOBP_TOOTH_MINERALIZATION	GOBP_TOOTH_MINERALIZATION	1/171	27/17872	0.228771677065704	0.442139255766656	0.375570762406605	FAM20A	1
GOBP_SMOOTH_MUSCLE_CELL_PROLIFERATION	GOBP_SMOOTH_MUSCLE_CELL_PROLIFERATION	GOBP_SMOOTH_MUSCLE_CELL_PROLIFERATION	3/171	173/17872	0.230125252920241	0.443129266942666	0.376411717484255	CYBA/AIF1/APOE	3
GOBP_NUCLEOSIDE_PHOSPHATE_BIOSYNTHETIC_PROCESS	GOBP_NUCLEOSIDE_PHOSPHATE_BIOSYNTHETIC_PROCESS	GOBP_NUCLEOSIDE_PHOSPHATE_BIOSYNTHETIC_PROCESS	4/171	256/17872	0.230240496253629	0.443129266942666	0.376411717484255	TMSB4X/ATP5MG/ALDOA/PPT1	4
GOBP_REGULATION_OF_T_CELL_ACTIVATION	GOBP_REGULATION_OF_T_CELL_ACTIVATION	GOBP_REGULATION_OF_T_CELL_ACTIVATION	5/171	342/17872	0.23042731429423	0.443129266942666	0.376411717484255	RPS3/AIF1/PYCARD/LGALS1/MALT1	5
GOBP_NEGATIVE_REGULATION_OF_NF_KAPPAB_TRANSCRIPTION_FACTOR_ACTIVITY	GOBP_NEGATIVE_REGULATION_OF_NF_KAPPAB_TRANSCRIPTION_FACTOR_ACTIVITY	GOBP_NEGATIVE_REGULATION_OF_NF_KAPPAB_TRANSCRIPTION_FACTOR_ACTIVITY	2/171	95/17872	0.23053570620134	0.443129266942666	0.376411717484255	TMSB4X/PYCARD	2
GOBP_PHAGOCYTOSIS_RECOGNITION	GOBP_PHAGOCYTOSIS_RECOGNITION	GOBP_PHAGOCYTOSIS_RECOGNITION	2/171	95/17872	0.23053570620134	0.443129266942666	0.376411717484255	FCN1/CD36	2
GOBP_POSITIVE_REGULATION_OF_SMOOTH_MUSCLE_CELL_PROLIFERATION	GOBP_POSITIVE_REGULATION_OF_SMOOTH_MUSCLE_CELL_PROLIFERATION	GOBP_POSITIVE_REGULATION_OF_SMOOTH_MUSCLE_CELL_PROLIFERATION	2/171	95/17872	0.23053570620134	0.443129266942666	0.376411717484255	CYBA/AIF1	2
GOBP_REGULATION_OF_T_CELL_PROLIFERATION	GOBP_REGULATION_OF_T_CELL_PROLIFERATION	GOBP_REGULATION_OF_T_CELL_PROLIFERATION	3/171	174/17872	0.232651855447313	0.446792532522687	0.379523441740453	RPS3/AIF1/PYCARD	3
GOBP_RESPONSE_TO_CHEMOKINE	GOBP_RESPONSE_TO_CHEMOKINE	GOBP_RESPONSE_TO_CHEMOKINE	2/171	96/17872	0.234066841059428	0.447066003491915	0.379755738916217	HIF1A/OXSR1	2
GOBP_JNK_CASCADE	GOBP_JNK_CASCADE	GOBP_JNK_CASCADE	3/171	175/17872	0.235183574167377	0.447066003491915	0.379755738916217	PYCARD/MAP4K3/GSTP1	3
GOBP_NEGATIVE_REGULATION_OF_WNT_SIGNALING_PATHWAY	GOBP_NEGATIVE_REGULATION_OF_WNT_SIGNALING_PATHWAY	GOBP_NEGATIVE_REGULATION_OF_WNT_SIGNALING_PATHWAY	3/171	175/17872	0.235183574167377	0.447066003491915	0.379755738916217	RACK1/PFDN5/APOE	3
GOBP_NEGATIVE_REGULATION_OF_INTERLEUKIN_2_PRODUCTION	GOBP_NEGATIVE_REGULATION_OF_INTERLEUKIN_2_PRODUCTION	GOBP_NEGATIVE_REGULATION_OF_INTERLEUKIN_2_PRODUCTION	1/171	28/17872	0.236161984895447	0.447066003491915	0.379755738916217	EZR	1
GOBP_POSITIVE_REGULATION_OF_LAMELLIPODIUM_ASSEMBLY	GOBP_POSITIVE_REGULATION_OF_LAMELLIPODIUM_ASSEMBLY	GOBP_POSITIVE_REGULATION_OF_LAMELLIPODIUM_ASSEMBLY	1/171	28/17872	0.236161984895447	0.447066003491915	0.379755738916217	ARPC2	1
GOBP_POSITIVE_REGULATION_OF_PROTEIN_TARGETING_TO_MEMBRANE	GOBP_POSITIVE_REGULATION_OF_PROTEIN_TARGETING_TO_MEMBRANE	GOBP_POSITIVE_REGULATION_OF_PROTEIN_TARGETING_TO_MEMBRANE	1/171	28/17872	0.236161984895447	0.447066003491915	0.379755738916217	ITGB2	1
GOBP_POSITIVE_REGULATION_OF_RECEPTOR_INTERNALIZATION	GOBP_POSITIVE_REGULATION_OF_RECEPTOR_INTERNALIZATION	GOBP_POSITIVE_REGULATION_OF_RECEPTOR_INTERNALIZATION	1/171	28/17872	0.236161984895447	0.447066003491915	0.379755738916217	CD63	1
GOBP_POSITIVE_REGULATION_OF_TOLL_LIKE_RECEPTOR_SIGNALING_PATHWAY	GOBP_POSITIVE_REGULATION_OF_TOLL_LIKE_RECEPTOR_SIGNALING_PATHWAY	GOBP_POSITIVE_REGULATION_OF_TOLL_LIKE_RECEPTOR_SIGNALING_PATHWAY	1/171	28/17872	0.236161984895447	0.447066003491915	0.379755738916217	CYBA	1
GOBP_RECEPTOR_CATABOLIC_PROCESS	GOBP_RECEPTOR_CATABOLIC_PROCESS	GOBP_RECEPTOR_CATABOLIC_PROCESS	1/171	28/17872	0.236161984895447	0.447066003491915	0.379755738916217	APOE	1
GOBP_REGULATION_OF_CYTOPLASMIC_TRANSLATION	GOBP_REGULATION_OF_CYTOPLASMIC_TRANSLATION	GOBP_REGULATION_OF_CYTOPLASMIC_TRANSLATION	1/171	28/17872	0.236161984895447	0.447066003491915	0.379755738916217	YBX1	1
GOBP_REGULATION_OF_CYTOPLASMIC_TRANSPORT	GOBP_REGULATION_OF_CYTOPLASMIC_TRANSPORT	GOBP_REGULATION_OF_CYTOPLASMIC_TRANSPORT	1/171	28/17872	0.236161984895447	0.447066003491915	0.379755738916217	EZR	1
GOBP_REGULATION_OF_MONOCYTE_CHEMOTAXIS	GOBP_REGULATION_OF_MONOCYTE_CHEMOTAXIS	GOBP_REGULATION_OF_MONOCYTE_CHEMOTAXIS	1/171	28/17872	0.236161984895447	0.447066003491915	0.379755738916217	AIF1	1
GOBP_REGULATION_OF_PLATELET_AGGREGATION	GOBP_REGULATION_OF_PLATELET_AGGREGATION	GOBP_REGULATION_OF_PLATELET_AGGREGATION	1/171	28/17872	0.236161984895447	0.447066003491915	0.379755738916217	CD9	1
GOBP_RESPONSE_TO_ISOQUINOLINE_ALKALOID	GOBP_RESPONSE_TO_ISOQUINOLINE_ALKALOID	GOBP_RESPONSE_TO_ISOQUINOLINE_ALKALOID	1/171	28/17872	0.236161984895447	0.447066003491915	0.379755738916217	AIF1	1
GOBP_T_CELL_CHEMOTAXIS	GOBP_T_CELL_CHEMOTAXIS	GOBP_T_CELL_CHEMOTAXIS	1/171	28/17872	0.236161984895447	0.447066003491915	0.379755738916217	OXSR1	1
GOBP_T_HELPER_17_CELL_DIFFERENTIATION	GOBP_T_HELPER_17_CELL_DIFFERENTIATION	GOBP_T_HELPER_17_CELL_DIFFERENTIATION	1/171	28/17872	0.236161984895447	0.447066003491915	0.379755738916217	MALT1	1
GOBP_MONONUCLEAR_CELL_DIFFERENTIATION	GOBP_MONONUCLEAR_CELL_DIFFERENTIATION	GOBP_MONONUCLEAR_CELL_DIFFERENTIATION	6/171	434/17872	0.236749587742488	0.447779273699951	0.380361619150419	RPS6/FCER1G/LGALS1/TMEM176B/TMEM176A/MALT1	6
GOBP_NEGATIVE_REGULATION_OF_EXTRINSIC_APOPTOTIC_SIGNALING_PATHWAY	GOBP_NEGATIVE_REGULATION_OF_EXTRINSIC_APOPTOTIC_SIGNALING_PATHWAY	GOBP_NEGATIVE_REGULATION_OF_EXTRINSIC_APOPTOTIC_SIGNALING_PATHWAY	2/171	97/17872	0.237601221169127	0.448990207974401	0.381390235141304	GPX1/GSTP1	2
GOBP_NEGATIVE_REGULATION_OF_PEPTIDASE_ACTIVITY	GOBP_NEGATIVE_REGULATION_OF_PEPTIDASE_ACTIVITY	GOBP_NEGATIVE_REGULATION_OF_PEPTIDASE_ACTIVITY	4/171	260/17872	0.238441968545407	0.450178436613729	0.382399564057851	GPX1/CSTB/CST3/CARD16	4
GOBP_TEMPERATURE_HOMEOSTASIS	GOBP_TEMPERATURE_HOMEOSTASIS	GOBP_TEMPERATURE_HOMEOSTASIS	3/171	177/17872	0.240261722884319	0.453211278335962	0.384975781082287	GPX1/CD36/FABP5	3
GOBP_RAS_PROTEIN_SIGNAL_TRANSDUCTION	GOBP_RAS_PROTEIN_SIGNAL_TRANSDUCTION	GOBP_RAS_PROTEIN_SIGNAL_TRANSDUCTION	5/171	348/17872	0.240999046151084	0.453247610964986	0.385006643470109	AIF1/APOE/GABARAP/ARHGDIB/CFL1	5
GOBP_CELL_SUBSTRATE_JUNCTION_ORGANIZATION	GOBP_CELL_SUBSTRATE_JUNCTION_ORGANIZATION	GOBP_CELL_SUBSTRATE_JUNCTION_ORGANIZATION	2/171	98/17872	0.241138463745606	0.453247610964986	0.385006643470109	LAMTOR2/ACTG1	2
GOBP_POSITIVE_REGULATION_OF_COLD_INDUCED_THERMOGENESIS	GOBP_POSITIVE_REGULATION_OF_COLD_INDUCED_THERMOGENESIS	GOBP_POSITIVE_REGULATION_OF_COLD_INDUCED_THERMOGENESIS	2/171	98/17872	0.241138463745606	0.453247610964986	0.385006643470109	CD36/FABP5	2
GOBP_ANTIGEN_PROCESSING_AND_PRESENTATION_OF_PEPTIDE_ANTIGEN_VIA_MHC_CLASS_I	GOBP_ANTIGEN_PROCESSING_AND_PRESENTATION_OF_PEPTIDE_ANTIGEN_VIA_MHC_CLASS_I	GOBP_ANTIGEN_PROCESSING_AND_PRESENTATION_OF_PEPTIDE_ANTIGEN_VIA_MHC_CLASS_I	1/171	29/17872	0.243481885174694	0.453247610964986	0.385006643470109	FCER1G	1
GOBP_ESTABLISHMENT_OF_MITOCHONDRION_LOCALIZATION	GOBP_ESTABLISHMENT_OF_MITOCHONDRION_LOCALIZATION	GOBP_ESTABLISHMENT_OF_MITOCHONDRION_LOCALIZATION	1/171	29/17872	0.243481885174694	0.453247610964986	0.385006643470109	HIF1A	1
GOBP_LIVER_REGENERATION	GOBP_LIVER_REGENERATION	GOBP_LIVER_REGENERATION	1/171	29/17872	0.243481885174694	0.453247610964986	0.385006643470109	RPS15	1
GOBP_LONG_CHAIN_FATTY_ACID_BIOSYNTHETIC_PROCESS	GOBP_LONG_CHAIN_FATTY_ACID_BIOSYNTHETIC_PROCESS	GOBP_LONG_CHAIN_FATTY_ACID_BIOSYNTHETIC_PROCESS	1/171	29/17872	0.243481885174694	0.453247610964986	0.385006643470109	GSTP1	1
GOBP_MYELOID_DENDRITIC_CELL_ACTIVATION	GOBP_MYELOID_DENDRITIC_CELL_ACTIVATION	GOBP_MYELOID_DENDRITIC_CELL_ACTIVATION	1/171	29/17872	0.243481885174694	0.453247610964986	0.385006643470109	PYCARD	1
GOBP_NEGATIVE_REGULATION_OF_STEROL_TRANSPORT	GOBP_NEGATIVE_REGULATION_OF_STEROL_TRANSPORT	GOBP_NEGATIVE_REGULATION_OF_STEROL_TRANSPORT	1/171	29/17872	0.243481885174694	0.453247610964986	0.385006643470109	APOC1	1
GOBP_PHOSPHATIDYLCHOLINE_BIOSYNTHETIC_PROCESS	GOBP_PHOSPHATIDYLCHOLINE_BIOSYNTHETIC_PROCESS	GOBP_PHOSPHATIDYLCHOLINE_BIOSYNTHETIC_PROCESS	1/171	29/17872	0.243481885174694	0.453247610964986	0.385006643470109	FABP5	1
GOBP_REGULATION_OF_CELLULAR_RESPONSE_TO_VASCULAR_ENDOTHELIAL_GROWTH_FACTOR_STIMULUS	GOBP_REGULATION_OF_CELLULAR_RESPONSE_TO_VASCULAR_ENDOTHELIAL_GROWTH_FACTOR_STIMULUS	GOBP_REGULATION_OF_CELLULAR_RESPONSE_TO_VASCULAR_ENDOTHELIAL_GROWTH_FACTOR_STIMULUS	1/171	29/17872	0.243481885174694	0.453247610964986	0.385006643470109	CD63	1
GOBP_RESPONSE_TO_DIETARY_EXCESS	GOBP_RESPONSE_TO_DIETARY_EXCESS	GOBP_RESPONSE_TO_DIETARY_EXCESS	1/171	29/17872	0.243481885174694	0.453247610964986	0.385006643470109	APOE	1
GOBP_RESPONSE_TO_OXYGEN_RADICAL	GOBP_RESPONSE_TO_OXYGEN_RADICAL	GOBP_RESPONSE_TO_OXYGEN_RADICAL	1/171	29/17872	0.243481885174694	0.453247610964986	0.385006643470109	CD36	1
GOBP_RESPONSE_TO_PAIN	GOBP_RESPONSE_TO_PAIN	GOBP_RESPONSE_TO_PAIN	1/171	29/17872	0.243481885174694	0.453247610964986	0.385006643470109	TSPO	1
GOBP_SYNAPTIC_TRANSMISSION_CHOLINERGIC	GOBP_SYNAPTIC_TRANSMISSION_CHOLINERGIC	GOBP_SYNAPTIC_TRANSMISSION_CHOLINERGIC	1/171	29/17872	0.243481885174694	0.453247610964986	0.385006643470109	APOE	1
GOBP_STEROL_HOMEOSTASIS	GOBP_STEROL_HOMEOSTASIS	GOBP_STEROL_HOMEOSTASIS	2/171	99/17872	0.24467819294856	0.455075728391193	0.386559519507634	NPC2/APOE	2
GOBP_INSULIN_SECRETION	GOBP_INSULIN_SECRETION	GOBP_INSULIN_SECRETION	3/171	179/17872	0.245358434062636	0.45514525235724	0.38661857594425	HIF1A/SELENOT/SERP1	3
GOBP_NEGATIVE_REGULATION_OF_IMMUNE_RESPONSE	GOBP_NEGATIVE_REGULATION_OF_IMMUNE_RESPONSE	GOBP_NEGATIVE_REGULATION_OF_IMMUNE_RESPONSE	3/171	179/17872	0.245358434062636	0.45514525235724	0.38661857594425	GPX1/GRN/RPS19	3
GOBP_NEGATIVE_REGULATION_OF_MAPK_CASCADE	GOBP_NEGATIVE_REGULATION_OF_MAPK_CASCADE	GOBP_NEGATIVE_REGULATION_OF_MAPK_CASCADE	3/171	179/17872	0.245358434062636	0.45514525235724	0.38661857594425	APOE/EZR/GSTP1	3
GOBP_REGULATION_OF_CELL_SIZE	GOBP_REGULATION_OF_CELL_SIZE	GOBP_REGULATION_OF_CELL_SIZE	3/171	180/17872	0.247913359516525	0.456267897308125	0.387572195453526	APOE/LAMTOR4/EZR	3
GOBP_B_CELL_PROLIFERATION	GOBP_B_CELL_PROLIFERATION	GOBP_B_CELL_PROLIFERATION	2/171	100/17872	0.24822003978571	0.456267897308125	0.387572195453526	TYROBP/MNDA	2
GOBP_POSITIVE_REGULATION_OF_MYELOID_CELL_DIFFERENTIATION	GOBP_POSITIVE_REGULATION_OF_MYELOID_CELL_DIFFERENTIATION	GOBP_POSITIVE_REGULATION_OF_MYELOID_CELL_DIFFERENTIATION	2/171	100/17872	0.24822003978571	0.456267897308125	0.387572195453526	TYROBP/HIF1A	2
GOBP_ANTIGEN_PROCESSING_AND_PRESENTATION_OF_EXOGENOUS_PEPTIDE_ANTIGEN_VIA_MHC_CLASS_II	GOBP_ANTIGEN_PROCESSING_AND_PRESENTATION_OF_EXOGENOUS_PEPTIDE_ANTIGEN_VIA_MHC_CLASS_II	GOBP_ANTIGEN_PROCESSING_AND_PRESENTATION_OF_EXOGENOUS_PEPTIDE_ANTIGEN_VIA_MHC_CLASS_II	1/171	30/17872	0.250732044768659	0.456267897308125	0.387572195453526	FCER1G	1
GOBP_CELLULAR_RESPONSE_TO_GAMMA_RADIATION	GOBP_CELLULAR_RESPONSE_TO_GAMMA_RADIATION	GOBP_CELLULAR_RESPONSE_TO_GAMMA_RADIATION	1/171	30/17872	0.250732044768659	0.456267897308125	0.387572195453526	CYBA	1
GOBP_ESTABLISHMENT_OF_PROTEIN_LOCALIZATION_TO_MITOCHONDRIAL_MEMBRANE	GOBP_ESTABLISHMENT_OF_PROTEIN_LOCALIZATION_TO_MITOCHONDRIAL_MEMBRANE	GOBP_ESTABLISHMENT_OF_PROTEIN_LOCALIZATION_TO_MITOCHONDRIAL_MEMBRANE	1/171	30/17872	0.250732044768659	0.456267897308125	0.387572195453526	HSP90AA1	1
GOBP_FC_GAMMA_RECEPTOR_SIGNALING_PATHWAY	GOBP_FC_GAMMA_RECEPTOR_SIGNALING_PATHWAY	GOBP_FC_GAMMA_RECEPTOR_SIGNALING_PATHWAY	1/171	30/17872	0.250732044768659	0.456267897308125	0.387572195453526	FCER1G	1
GOBP_HYDROGEN_PEROXIDE_CATABOLIC_PROCESS	GOBP_HYDROGEN_PEROXIDE_CATABOLIC_PROCESS	GOBP_HYDROGEN_PEROXIDE_CATABOLIC_PROCESS	1/171	30/17872	0.250732044768659	0.456267897308125	0.387572195453526	GPX1	1
GOBP_MYELOID_LEUKOCYTE_CYTOKINE_PRODUCTION	GOBP_MYELOID_LEUKOCYTE_CYTOKINE_PRODUCTION	GOBP_MYELOID_LEUKOCYTE_CYTOKINE_PRODUCTION	1/171	30/17872	0.250732044768659	0.456267897308125	0.387572195453526	CD36	1
GOBP_NEGATIVE_REGULATION_OF_ATP_METABOLIC_PROCESS	GOBP_NEGATIVE_REGULATION_OF_ATP_METABOLIC_PROCESS	GOBP_NEGATIVE_REGULATION_OF_ATP_METABOLIC_PROCESS	1/171	30/17872	0.250732044768659	0.456267897308125	0.387572195453526	TSPO	1
GOBP_NEGATIVE_REGULATION_OF_BIOMINERALIZATION	GOBP_NEGATIVE_REGULATION_OF_BIOMINERALIZATION	GOBP_NEGATIVE_REGULATION_OF_BIOMINERALIZATION	1/171	30/17872	0.250732044768659	0.456267897308125	0.387572195453526	HIF1A	1
GOBP_NEGATIVE_REGULATION_OF_FIBROBLAST_PROLIFERATION	GOBP_NEGATIVE_REGULATION_OF_FIBROBLAST_PROLIFERATION	GOBP_NEGATIVE_REGULATION_OF_FIBROBLAST_PROLIFERATION	1/171	30/17872	0.250732044768659	0.456267897308125	0.387572195453526	GSTP1	1
GOBP_NEGATIVE_REGULATION_OF_STEROID_METABOLIC_PROCESS	GOBP_NEGATIVE_REGULATION_OF_STEROID_METABOLIC_PROCESS	GOBP_NEGATIVE_REGULATION_OF_STEROID_METABOLIC_PROCESS	1/171	30/17872	0.250732044768659	0.456267897308125	0.387572195453526	APOE	1
GOBP_POSITIVE_REGULATION_OF_DNA_TEMPLATED_TRANSCRIPTION_ELONGATION	GOBP_POSITIVE_REGULATION_OF_DNA_TEMPLATED_TRANSCRIPTION_ELONGATION	GOBP_POSITIVE_REGULATION_OF_DNA_TEMPLATED_TRANSCRIPTION_ELONGATION	1/171	30/17872	0.250732044768659	0.456267897308125	0.387572195453526	SUPT4H1	1
GOBP_POSITIVE_REGULATION_OF_MULTICELLULAR_ORGANISM_GROWTH	GOBP_POSITIVE_REGULATION_OF_MULTICELLULAR_ORGANISM_GROWTH	GOBP_POSITIVE_REGULATION_OF_MULTICELLULAR_ORGANISM_GROWTH	1/171	30/17872	0.250732044768659	0.456267897308125	0.387572195453526	EZR	1
GOBP_PURINE_NUCLEOTIDE_TRANSPORT	GOBP_PURINE_NUCLEOTIDE_TRANSPORT	GOBP_PURINE_NUCLEOTIDE_TRANSPORT	1/171	30/17872	0.250732044768659	0.456267897308125	0.387572195453526	SLC25A6	1
GOBP_REGULATION_OF_ENDOPLASMIC_RETICULUM_UNFOLDED_PROTEIN_RESPONSE	GOBP_REGULATION_OF_ENDOPLASMIC_RETICULUM_UNFOLDED_PROTEIN_RESPONSE	GOBP_REGULATION_OF_ENDOPLASMIC_RETICULUM_UNFOLDED_PROTEIN_RESPONSE	1/171	30/17872	0.250732044768659	0.456267897308125	0.387572195453526	RACK1	1
GOBP_REGULATION_OF_GLIAL_CELL_PROLIFERATION	GOBP_REGULATION_OF_GLIAL_CELL_PROLIFERATION	GOBP_REGULATION_OF_GLIAL_CELL_PROLIFERATION	1/171	30/17872	0.250732044768659	0.456267897308125	0.387572195453526	TSPO	1
GOBP_REGULATION_OF_PROTEIN_POLYUBIQUITINATION	GOBP_REGULATION_OF_PROTEIN_POLYUBIQUITINATION	GOBP_REGULATION_OF_PROTEIN_POLYUBIQUITINATION	1/171	30/17872	0.250732044768659	0.456267897308125	0.387572195453526	GABARAP	1
GOBP_REGULATION_OF_SYNCYTIUM_FORMATION_BY_PLASMA_MEMBRANE_FUSION	GOBP_REGULATION_OF_SYNCYTIUM_FORMATION_BY_PLASMA_MEMBRANE_FUSION	GOBP_REGULATION_OF_SYNCYTIUM_FORMATION_BY_PLASMA_MEMBRANE_FUSION	1/171	30/17872	0.250732044768659	0.456267897308125	0.387572195453526	TYROBP	1
GOBP_RESPONSE_TO_ANGIOTENSIN	GOBP_RESPONSE_TO_ANGIOTENSIN	GOBP_RESPONSE_TO_ANGIOTENSIN	1/171	30/17872	0.250732044768659	0.456267897308125	0.387572195453526	CYBA	1
GOBP_COLLAGEN_METABOLIC_PROCESS	GOBP_COLLAGEN_METABOLIC_PROCESS	GOBP_COLLAGEN_METABOLIC_PROCESS	2/171	101/17872	0.251763642017477	0.456267897308125	0.387572195453526	HIF1A/CST3	2
GOBP_CYTOKINE_PRODUCTION_INVOLVED_IN_IMMUNE_RESPONSE	GOBP_CYTOKINE_PRODUCTION_INVOLVED_IN_IMMUNE_RESPONSE	GOBP_CYTOKINE_PRODUCTION_INVOLVED_IN_IMMUNE_RESPONSE	2/171	101/17872	0.251763642017477	0.456267897308125	0.387572195453526	CD36/MALT1	2
GOBP_INTRINSIC_APOPTOTIC_SIGNALING_PATHWAY_IN_RESPONSE_TO_DNA_DAMAGE	GOBP_INTRINSIC_APOPTOTIC_SIGNALING_PATHWAY_IN_RESPONSE_TO_DNA_DAMAGE	GOBP_INTRINSIC_APOPTOTIC_SIGNALING_PATHWAY_IN_RESPONSE_TO_DNA_DAMAGE	2/171	101/17872	0.251763642017477	0.456267897308125	0.387572195453526	RPS3/PYCARD	2
GOBP_LIPOPROTEIN_BIOSYNTHETIC_PROCESS	GOBP_LIPOPROTEIN_BIOSYNTHETIC_PROCESS	GOBP_LIPOPROTEIN_BIOSYNTHETIC_PROCESS	2/171	101/17872	0.251763642017477	0.456267897308125	0.387572195453526	APOE/DBI	2
GOBP_PIGMENTATION	GOBP_PIGMENTATION	GOBP_PIGMENTATION	2/171	101/17872	0.251763642017477	0.456267897308125	0.387572195453526	CD63/RACK1	2
GOBP_REGULATION_OF_ACTOMYOSIN_STRUCTURE_ORGANIZATION	GOBP_REGULATION_OF_ACTOMYOSIN_STRUCTURE_ORGANIZATION	GOBP_REGULATION_OF_ACTOMYOSIN_STRUCTURE_ORGANIZATION	2/171	101/17872	0.251763642017477	0.456267897308125	0.387572195453526	PFN1/ACTG1	2
GOBP_NEGATIVE_REGULATION_OF_INTRINSIC_APOPTOTIC_SIGNALING_PATHWAY	GOBP_NEGATIVE_REGULATION_OF_INTRINSIC_APOPTOTIC_SIGNALING_PATHWAY	GOBP_NEGATIVE_REGULATION_OF_INTRINSIC_APOPTOTIC_SIGNALING_PATHWAY	2/171	102/17872	0.255308644062855	0.462298005106142	0.392694410125844	GPX1/HIF1A	2
GOBP_ANGIOGENESIS_INVOLVED_IN_WOUND_HEALING	GOBP_ANGIOGENESIS_INVOLVED_IN_WOUND_HEALING	GOBP_ANGIOGENESIS_INVOLVED_IN_WOUND_HEALING	1/171	31/17872	0.257913124263366	0.462675233053538	0.393014842627498	GPX1	1
GOBP_B_CELL_HOMEOSTASIS	GOBP_B_CELL_HOMEOSTASIS	GOBP_B_CELL_HOMEOSTASIS	1/171	31/17872	0.257913124263366	0.462675233053538	0.393014842627498	HIF1A	1
GOBP_CHONDROCYTE_DEVELOPMENT	GOBP_CHONDROCYTE_DEVELOPMENT	GOBP_CHONDROCYTE_DEVELOPMENT	1/171	31/17872	0.257913124263366	0.462675233053538	0.393014842627498	SULF2	1
GOBP_ENDOTHELIAL_CELL_CHEMOTAXIS	GOBP_ENDOTHELIAL_CELL_CHEMOTAXIS	GOBP_ENDOTHELIAL_CELL_CHEMOTAXIS	1/171	31/17872	0.257913124263366	0.462675233053538	0.393014842627498	TMSB4X	1
GOBP_NEGATIVE_REGULATION_OF_EXTRINSIC_APOPTOTIC_SIGNALING_PATHWAY_VIA_DEATH_DOMAIN_RECEPTORS	GOBP_NEGATIVE_REGULATION_OF_EXTRINSIC_APOPTOTIC_SIGNALING_PATHWAY_VIA_DEATH_DOMAIN_RECEPTORS	GOBP_NEGATIVE_REGULATION_OF_EXTRINSIC_APOPTOTIC_SIGNALING_PATHWAY_VIA_DEATH_DOMAIN_RECEPTORS	1/171	31/17872	0.257913124263366	0.462675233053538	0.393014842627498	GPX1	1
GOBP_NEGATIVE_REGULATION_OF_INFLAMMATORY_RESPONSE_TO_ANTIGENIC_STIMULUS	GOBP_NEGATIVE_REGULATION_OF_INFLAMMATORY_RESPONSE_TO_ANTIGENIC_STIMULUS	GOBP_NEGATIVE_REGULATION_OF_INFLAMMATORY_RESPONSE_TO_ANTIGENIC_STIMULUS	1/171	31/17872	0.257913124263366	0.462675233053538	0.393014842627498	GPX1	1
GOBP_NEGATIVE_REGULATION_OF_PEPTIDYL_SERINE_PHOSPHORYLATION	GOBP_NEGATIVE_REGULATION_OF_PEPTIDYL_SERINE_PHOSPHORYLATION	GOBP_NEGATIVE_REGULATION_OF_PEPTIDYL_SERINE_PHOSPHORYLATION	1/171	31/17872	0.257913124263366	0.462675233053538	0.393014842627498	RACK1	1
GOBP_NEGATIVE_REGULATION_OF_PROTEIN_TYROSINE_KINASE_ACTIVITY	GOBP_NEGATIVE_REGULATION_OF_PROTEIN_TYROSINE_KINASE_ACTIVITY	GOBP_NEGATIVE_REGULATION_OF_PROTEIN_TYROSINE_KINASE_ACTIVITY	1/171	31/17872	0.257913124263366	0.462675233053538	0.393014842627498	RACK1	1
GOBP_REGULATION_OF_ACTIN_NUCLEATION	GOBP_REGULATION_OF_ACTIN_NUCLEATION	GOBP_REGULATION_OF_ACTIN_NUCLEATION	1/171	31/17872	0.257913124263366	0.462675233053538	0.393014842627498	GMFG	1
GOBP_RESPONSE_TO_INTERFERON_BETA	GOBP_RESPONSE_TO_INTERFERON_BETA	GOBP_RESPONSE_TO_INTERFERON_BETA	1/171	31/17872	0.257913124263366	0.462675233053538	0.393014842627498	MNDA	1
GOBP_RESPONSE_TO_IRON_ION	GOBP_RESPONSE_TO_IRON_ION	GOBP_RESPONSE_TO_IRON_ION	1/171	31/17872	0.257913124263366	0.462675233053538	0.393014842627498	HIF1A	1
GOBP_PROTEIN_LOCALIZATION_TO_EXTRACELLULAR_REGION	GOBP_PROTEIN_LOCALIZATION_TO_EXTRACELLULAR_REGION	GOBP_PROTEIN_LOCALIZATION_TO_EXTRACELLULAR_REGION	5/171	359/17872	0.260711017113152	0.467224820280381	0.396879443929316	HIF1A/APOE/EZR/SELENOT/SERP1	5
GOBP_DIGESTIVE_SYSTEM_PROCESS	GOBP_DIGESTIVE_SYSTEM_PROCESS	GOBP_DIGESTIVE_SYSTEM_PROCESS	2/171	104/17872	0.262401458006589	0.467224820280381	0.396879443929316	CD36/EZR	2
GOBP_MUSCLE_CELL_MIGRATION	GOBP_MUSCLE_CELL_MIGRATION	GOBP_MUSCLE_CELL_MIGRATION	2/171	104/17872	0.262401458006589	0.467224820280381	0.396879443929316	AIF1/S100A11	2
GOBP_NEURAL_TUBE_FORMATION	GOBP_NEURAL_TUBE_FORMATION	GOBP_NEURAL_TUBE_FORMATION	2/171	104/17872	0.262401458006589	0.467224820280381	0.396879443929316	HIF1A/PFN1	2
GOBP_CELL_DEATH_IN_RESPONSE_TO_HYDROGEN_PEROXIDE	GOBP_CELL_DEATH_IN_RESPONSE_TO_HYDROGEN_PEROXIDE	GOBP_CELL_DEATH_IN_RESPONSE_TO_HYDROGEN_PEROXIDE	1/171	32/17872	0.26502577802442	0.467224820280381	0.396879443929316	RACK1	1
GOBP_HEPARAN_SULFATE_PROTEOGLYCAN_METABOLIC_PROCESS	GOBP_HEPARAN_SULFATE_PROTEOGLYCAN_METABOLIC_PROCESS	GOBP_HEPARAN_SULFATE_PROTEOGLYCAN_METABOLIC_PROCESS	1/171	32/17872	0.26502577802442	0.467224820280381	0.396879443929316	SULF2	1
GOBP_INTRACELLULAR_STEROL_TRANSPORT	GOBP_INTRACELLULAR_STEROL_TRANSPORT	GOBP_INTRACELLULAR_STEROL_TRANSPORT	1/171	32/17872	0.26502577802442	0.467224820280381	0.396879443929316	NPC2	1
GOBP_NEGATIVE_REGULATION_OF_DNA_REPLICATION	GOBP_NEGATIVE_REGULATION_OF_DNA_REPLICATION	GOBP_NEGATIVE_REGULATION_OF_DNA_REPLICATION	1/171	32/17872	0.26502577802442	0.467224820280381	0.396879443929316	S100A11	1
GOBP_NEGATIVE_REGULATION_OF_POTASSIUM_ION_TRANSMEMBRANE_TRANSPORT	GOBP_NEGATIVE_REGULATION_OF_POTASSIUM_ION_TRANSMEMBRANE_TRANSPORT	GOBP_NEGATIVE_REGULATION_OF_POTASSIUM_ION_TRANSMEMBRANE_TRANSPORT	1/171	32/17872	0.26502577802442	0.467224820280381	0.396879443929316	OXSR1	1
GOBP_NEGATIVE_REGULATION_OF_TYPE_I_INTERFERON_PRODUCTION	GOBP_NEGATIVE_REGULATION_OF_TYPE_I_INTERFERON_PRODUCTION	GOBP_NEGATIVE_REGULATION_OF_TYPE_I_INTERFERON_PRODUCTION	1/171	32/17872	0.26502577802442	0.467224820280381	0.396879443929316	PYCARD	1
GOBP_PHOSPHATIDYLINOSITOL_DEPHOSPHORYLATION	GOBP_PHOSPHATIDYLINOSITOL_DEPHOSPHORYLATION	GOBP_PHOSPHATIDYLINOSITOL_DEPHOSPHORYLATION	1/171	32/17872	0.26502577802442	0.467224820280381	0.396879443929316	INPP5A	1
GOBP_POSITIVE_REGULATION_OF_CD4_POSITIVE_ALPHA_BETA_T_CELL_DIFFERENTIATION	GOBP_POSITIVE_REGULATION_OF_CD4_POSITIVE_ALPHA_BETA_T_CELL_DIFFERENTIATION	GOBP_POSITIVE_REGULATION_OF_CD4_POSITIVE_ALPHA_BETA_T_CELL_DIFFERENTIATION	1/171	32/17872	0.26502577802442	0.467224820280381	0.396879443929316	MALT1	1
GOBP_POSITIVE_REGULATION_OF_MRNA_PROCESSING	GOBP_POSITIVE_REGULATION_OF_MRNA_PROCESSING	GOBP_POSITIVE_REGULATION_OF_MRNA_PROCESSING	1/171	32/17872	0.26502577802442	0.467224820280381	0.396879443929316	HSPA8	1
GOBP_POSITIVE_REGULATION_OF_UBIQUITIN_PROTEIN_TRANSFERASE_ACTIVITY	GOBP_POSITIVE_REGULATION_OF_UBIQUITIN_PROTEIN_TRANSFERASE_ACTIVITY	GOBP_POSITIVE_REGULATION_OF_UBIQUITIN_PROTEIN_TRANSFERASE_ACTIVITY	1/171	32/17872	0.26502577802442	0.467224820280381	0.396879443929316	RPS2	1
GOBP_PROSTANOID_BIOSYNTHETIC_PROCESS	GOBP_PROSTANOID_BIOSYNTHETIC_PROCESS	GOBP_PROSTANOID_BIOSYNTHETIC_PROCESS	1/171	32/17872	0.26502577802442	0.467224820280381	0.396879443929316	FABP5	1
GOBP_REGULATION_OF_MACROPHAGE_DERIVED_FOAM_CELL_DIFFERENTIATION	GOBP_REGULATION_OF_MACROPHAGE_DERIVED_FOAM_CELL_DIFFERENTIATION	GOBP_REGULATION_OF_MACROPHAGE_DERIVED_FOAM_CELL_DIFFERENTIATION	1/171	32/17872	0.26502577802442	0.467224820280381	0.396879443929316	CD36	1
GOBP_REGULATION_OF_NEURON_PROJECTION_REGENERATION	GOBP_REGULATION_OF_NEURON_PROJECTION_REGENERATION	GOBP_REGULATION_OF_NEURON_PROJECTION_REGENERATION	1/171	32/17872	0.26502577802442	0.467224820280381	0.396879443929316	GRN	1
GOBP_REGULATION_OF_RUFFLE_ASSEMBLY	GOBP_REGULATION_OF_RUFFLE_ASSEMBLY	GOBP_REGULATION_OF_RUFFLE_ASSEMBLY	1/171	32/17872	0.26502577802442	0.467224820280381	0.396879443929316	PFN1	1
GOBP_REGULATION_OF_VASCULAR_ENDOTHELIAL_GROWTH_FACTOR_RECEPTOR_SIGNALING_PATHWAY	GOBP_REGULATION_OF_VASCULAR_ENDOTHELIAL_GROWTH_FACTOR_RECEPTOR_SIGNALING_PATHWAY	GOBP_REGULATION_OF_VASCULAR_ENDOTHELIAL_GROWTH_FACTOR_RECEPTOR_SIGNALING_PATHWAY	1/171	32/17872	0.26502577802442	0.467224820280381	0.396879443929316	HIF1A	1
GOBP_POSITIVE_REGULATION_OF_ION_TRANSPORT	GOBP_POSITIVE_REGULATION_OF_ION_TRANSPORT	GOBP_POSITIVE_REGULATION_OF_ION_TRANSPORT	4/171	273/17872	0.265541737292098	0.467224820280381	0.396879443929316	TMSB4X/VAMP8/TSPO/NDUFA4	4
GOBP_CELL_KILLING	GOBP_CELL_KILLING	GOBP_CELL_KILLING	3/171	187/17872	0.265906156128148	0.467224820280381	0.396879443929316	TYROBP/STXBP2/RPS19	3
GOBP_REGULATION_OF_MAP_KINASE_ACTIVITY	GOBP_REGULATION_OF_MAP_KINASE_ACTIVITY	GOBP_REGULATION_OF_MAP_KINASE_ACTIVITY	3/171	187/17872	0.265906156128148	0.467224820280381	0.396879443929316	RPS3/APOE/GSTP1	3
GOBP_APOPTOTIC_MITOCHONDRIAL_CHANGES	GOBP_APOPTOTIC_MITOCHONDRIAL_CHANGES	GOBP_APOPTOTIC_MITOCHONDRIAL_CHANGES	2/171	105/17872	0.265948591204793	0.467224820280381	0.396879443929316	GPX1/PYCARD	2
GOBP_MITOCHONDRIAL_TRANSMEMBRANE_TRANSPORT	GOBP_MITOCHONDRIAL_TRANSMEMBRANE_TRANSPORT	GOBP_MITOCHONDRIAL_TRANSMEMBRANE_TRANSPORT	2/171	105/17872	0.265948591204793	0.467224820280381	0.396879443929316	ATP5MG/SLC25A6	2
GOBP_NEGATIVE_REGULATION_OF_LIPID_METABOLIC_PROCESS	GOBP_NEGATIVE_REGULATION_OF_LIPID_METABOLIC_PROCESS	GOBP_NEGATIVE_REGULATION_OF_LIPID_METABOLIC_PROCESS	2/171	105/17872	0.265948591204793	0.467224820280381	0.396879443929316	APOE/APOC1	2
GOBP_REGULATION_OF_RAS_PROTEIN_SIGNAL_TRANSDUCTION	GOBP_REGULATION_OF_RAS_PROTEIN_SIGNAL_TRANSDUCTION	GOBP_REGULATION_OF_RAS_PROTEIN_SIGNAL_TRANSDUCTION	3/171	188/17872	0.268490222532478	0.471300192280151	0.400341227856169	APOE/GABARAP/ARHGDIB	3
GOBP_POSITIVE_REGULATION_OF_PLASMA_MEMBRANE_BOUNDED_CELL_PROJECTION_ASSEMBLY	GOBP_POSITIVE_REGULATION_OF_PLASMA_MEMBRANE_BOUNDED_CELL_PROJECTION_ASSEMBLY	GOBP_POSITIVE_REGULATION_OF_PLASMA_MEMBRANE_BOUNDED_CELL_PROJECTION_ASSEMBLY	2/171	106/17872	0.269495766636076	0.472122605913504	0.401039818879842	PFN1/ARPC2	2
GOBP_REGULATION_OF_ACTIN_FILAMENT_BUNDLE_ASSEMBLY	GOBP_REGULATION_OF_ACTIN_FILAMENT_BUNDLE_ASSEMBLY	GOBP_REGULATION_OF_ACTIN_FILAMENT_BUNDLE_ASSEMBLY	2/171	106/17872	0.269495766636076	0.472122605913504	0.401039818879842	PFN1/ACTG1	2
GOBP_CELL_SUBSTRATE_ADHESION	GOBP_CELL_SUBSTRATE_ADHESION	GOBP_CELL_SUBSTRATE_ADHESION	5/171	365/17872	0.271622618038318	0.472122605913504	0.401039818879842	CD63/ITGB2/ACTG1/CD36/ARPC2	5
GOBP_ESTABLISHMENT_OF_EPITHELIAL_CELL_POLARITY	GOBP_ESTABLISHMENT_OF_EPITHELIAL_CELL_POLARITY	GOBP_ESTABLISHMENT_OF_EPITHELIAL_CELL_POLARITY	1/171	33/17872	0.27207065425524	0.472122605913504	0.401039818879842	EZR	1
GOBP_FC_RECEPTOR_MEDIATED_STIMULATORY_SIGNALING_PATHWAY	GOBP_FC_RECEPTOR_MEDIATED_STIMULATORY_SIGNALING_PATHWAY	GOBP_FC_RECEPTOR_MEDIATED_STIMULATORY_SIGNALING_PATHWAY	1/171	33/17872	0.27207065425524	0.472122605913504	0.401039818879842	FCER1G	1
GOBP_INTERLEUKIN_4_PRODUCTION	GOBP_INTERLEUKIN_4_PRODUCTION	GOBP_INTERLEUKIN_4_PRODUCTION	1/171	33/17872	0.27207065425524	0.472122605913504	0.401039818879842	FCER1G	1
GOBP_NEGATIVE_REGULATION_OF_AMYLOID_PRECURSOR_PROTEIN_CATABOLIC_PROCESS	GOBP_NEGATIVE_REGULATION_OF_AMYLOID_PRECURSOR_PROTEIN_CATABOLIC_PROCESS	GOBP_NEGATIVE_REGULATION_OF_AMYLOID_PRECURSOR_PROTEIN_CATABOLIC_PROCESS	1/171	33/17872	0.27207065425524	0.472122605913504	0.401039818879842	APOE	1
GOBP_NEGATIVE_REGULATION_OF_ANTIGEN_RECEPTOR_MEDIATED_SIGNALING_PATHWAY	GOBP_NEGATIVE_REGULATION_OF_ANTIGEN_RECEPTOR_MEDIATED_SIGNALING_PATHWAY	GOBP_NEGATIVE_REGULATION_OF_ANTIGEN_RECEPTOR_MEDIATED_SIGNALING_PATHWAY	1/171	33/17872	0.27207065425524	0.472122605913504	0.401039818879842	EZR	1
GOBP_NEGATIVE_REGULATION_OF_LYMPHOCYTE_APOPTOTIC_PROCESS	GOBP_NEGATIVE_REGULATION_OF_LYMPHOCYTE_APOPTOTIC_PROCESS	GOBP_NEGATIVE_REGULATION_OF_LYMPHOCYTE_APOPTOTIC_PROCESS	1/171	33/17872	0.27207065425524	0.472122605913504	0.401039818879842	HIF1A	1
GOBP_NEGATIVE_REGULATION_OF_PROTEIN_LOCALIZATION_TO_MEMBRANE	GOBP_NEGATIVE_REGULATION_OF_PROTEIN_LOCALIZATION_TO_MEMBRANE	GOBP_NEGATIVE_REGULATION_OF_PROTEIN_LOCALIZATION_TO_MEMBRANE	1/171	33/17872	0.27207065425524	0.472122605913504	0.401039818879842	TMEM59	1
GOBP_NEGATIVE_REGULATION_OF_SMOOTHENED_SIGNALING_PATHWAY	GOBP_NEGATIVE_REGULATION_OF_SMOOTHENED_SIGNALING_PATHWAY	GOBP_NEGATIVE_REGULATION_OF_SMOOTHENED_SIGNALING_PATHWAY	1/171	33/17872	0.27207065425524	0.472122605913504	0.401039818879842	RACK1	1
GOBP_REGULATION_OF_AEROBIC_RESPIRATION	GOBP_REGULATION_OF_AEROBIC_RESPIRATION	GOBP_REGULATION_OF_AEROBIC_RESPIRATION	1/171	33/17872	0.27207065425524	0.472122605913504	0.401039818879842	HIF1A	1
GOBP_REGULATION_OF_RENAL_SYSTEM_PROCESS	GOBP_REGULATION_OF_RENAL_SYSTEM_PROCESS	GOBP_REGULATION_OF_RENAL_SYSTEM_PROCESS	1/171	33/17872	0.27207065425524	0.472122605913504	0.401039818879842	CYBA	1
GOBP_REGULATION_OF_SENSORY_PERCEPTION	GOBP_REGULATION_OF_SENSORY_PERCEPTION	GOBP_REGULATION_OF_SENSORY_PERCEPTION	1/171	33/17872	0.27207065425524	0.472122605913504	0.401039818879842	FABP5	1
GOBP_ANTIGEN_PROCESSING_AND_PRESENTATION	GOBP_ANTIGEN_PROCESSING_AND_PRESENTATION	GOBP_ANTIGEN_PROCESSING_AND_PRESENTATION	2/171	107/17872	0.273042660640576	0.472576406957706	0.401425295631632	PYCARD/FCER1G	2
GOBP_DEFENSE_RESPONSE_TO_GRAM_POSITIVE_BACTERIUM	GOBP_DEFENSE_RESPONSE_TO_GRAM_POSITIVE_BACTERIUM	GOBP_DEFENSE_RESPONSE_TO_GRAM_POSITIVE_BACTERIUM	2/171	107/17872	0.273042660640576	0.472576406957706	0.401425295631632	PYCARD/CD36	2
GOBP_REGULATION_OF_PATTERN_RECOGNITION_RECEPTOR_SIGNALING_PATHWAY	GOBP_REGULATION_OF_PATTERN_RECOGNITION_RECEPTOR_SIGNALING_PATHWAY	GOBP_REGULATION_OF_PATTERN_RECOGNITION_RECEPTOR_SIGNALING_PATHWAY	2/171	107/17872	0.273042660640576	0.472576406957706	0.401425295631632	CYBA/CD36	2
GOBP_CELLULAR_MODIFIED_AMINO_ACID_METABOLIC_PROCESS	GOBP_CELLULAR_MODIFIED_AMINO_ACID_METABOLIC_PROCESS	GOBP_CELLULAR_MODIFIED_AMINO_ACID_METABOLIC_PROCESS	3/171	190/17872	0.273667128322965	0.472576406957706	0.401425295631632	GPX1/EEF1G/GSTP1	3
GOBP_GASTRULATION	GOBP_GASTRULATION	GOBP_GASTRULATION	3/171	190/17872	0.273667128322965	0.472576406957706	0.401425295631632	RACK1/RPS6/ITGB2	3
GOBP_RESPONSE_TO_KETONE	GOBP_RESPONSE_TO_KETONE	GOBP_RESPONSE_TO_KETONE	3/171	190/17872	0.273667128322965	0.472576406957706	0.401425295631632	CYBA/TSPO/RPL27	3
GOBP_NEGATIVE_REGULATION_OF_CELLULAR_AMIDE_METABOLIC_PROCESS	GOBP_NEGATIVE_REGULATION_OF_CELLULAR_AMIDE_METABOLIC_PROCESS	GOBP_NEGATIVE_REGULATION_OF_CELLULAR_AMIDE_METABOLIC_PROCESS	4/171	278/17872	0.276118409640656	0.475299752282498	0.403738614041135	RPS3/RACK1/APOE/YBX1	4
GOBP_RESPONSE_TO_HEAT	GOBP_RESPONSE_TO_HEAT	GOBP_RESPONSE_TO_HEAT	2/171	108/17872	0.276588955676203	0.475299752282498	0.403738614041135	CD14/HSP90AA1	2
GOBP_CHAPERONE_COFACTOR_DEPENDENT_PROTEIN_REFOLDING	GOBP_CHAPERONE_COFACTOR_DEPENDENT_PROTEIN_REFOLDING	GOBP_CHAPERONE_COFACTOR_DEPENDENT_PROTEIN_REFOLDING	1/171	34/17872	0.279048395054744	0.475299752282498	0.403738614041135	HSPA8	1
GOBP_GLYCEROPHOSPHOLIPID_CATABOLIC_PROCESS	GOBP_GLYCEROPHOSPHOLIPID_CATABOLIC_PROCESS	GOBP_GLYCEROPHOSPHOLIPID_CATABOLIC_PROCESS	1/171	34/17872	0.279048395054744	0.475299752282498	0.403738614041135	APOC1	1
GOBP_INTRA_GOLGI_VESICLE_MEDIATED_TRANSPORT	GOBP_INTRA_GOLGI_VESICLE_MEDIATED_TRANSPORT	GOBP_INTRA_GOLGI_VESICLE_MEDIATED_TRANSPORT	1/171	34/17872	0.279048395054744	0.475299752282498	0.403738614041135	COPE	1
GOBP_LOW_DENSITY_LIPOPROTEIN_PARTICLE_CLEARANCE	GOBP_LOW_DENSITY_LIPOPROTEIN_PARTICLE_CLEARANCE	GOBP_LOW_DENSITY_LIPOPROTEIN_PARTICLE_CLEARANCE	1/171	34/17872	0.279048395054744	0.475299752282498	0.403738614041135	CD36	1
GOBP_MITOPHAGY	GOBP_MITOPHAGY	GOBP_MITOPHAGY	1/171	34/17872	0.279048395054744	0.475299752282498	0.403738614041135	MAP1LC3B	1
GOBP_NEGATIVE_REGULATION_OF_PROTEIN_DEPHOSPHORYLATION	GOBP_NEGATIVE_REGULATION_OF_PROTEIN_DEPHOSPHORYLATION	GOBP_NEGATIVE_REGULATION_OF_PROTEIN_DEPHOSPHORYLATION	1/171	34/17872	0.279048395054744	0.475299752282498	0.403738614041135	YWHAB	1
GOBP_NEGATIVE_REGULATION_OF_PROTEIN_LOCALIZATION_TO_NUCLEUS	GOBP_NEGATIVE_REGULATION_OF_PROTEIN_LOCALIZATION_TO_NUCLEUS	GOBP_NEGATIVE_REGULATION_OF_PROTEIN_LOCALIZATION_TO_NUCLEUS	1/171	34/17872	0.279048395054744	0.475299752282498	0.403738614041135	CD36	1
GOBP_POSITIVE_REGULATION_OF_ERYTHROCYTE_DIFFERENTIATION	GOBP_POSITIVE_REGULATION_OF_ERYTHROCYTE_DIFFERENTIATION	GOBP_POSITIVE_REGULATION_OF_ERYTHROCYTE_DIFFERENTIATION	1/171	34/17872	0.279048395054744	0.475299752282498	0.403738614041135	HIF1A	1
GOBP_POSITIVE_REGULATION_OF_TELOMERASE_ACTIVITY	GOBP_POSITIVE_REGULATION_OF_TELOMERASE_ACTIVITY	GOBP_POSITIVE_REGULATION_OF_TELOMERASE_ACTIVITY	1/171	34/17872	0.279048395054744	0.475299752282498	0.403738614041135	HSP90AA1	1
GOBP_REGULATION_OF_CELLULAR_AMINE_METABOLIC_PROCESS	GOBP_REGULATION_OF_CELLULAR_AMINE_METABOLIC_PROCESS	GOBP_REGULATION_OF_CELLULAR_AMINE_METABOLIC_PROCESS	1/171	34/17872	0.279048395054744	0.475299752282498	0.403738614041135	ITGB2	1
GOBP_REGULATION_OF_LIPOPROTEIN_PARTICLE_CLEARANCE	GOBP_REGULATION_OF_LIPOPROTEIN_PARTICLE_CLEARANCE	GOBP_REGULATION_OF_LIPOPROTEIN_PARTICLE_CLEARANCE	1/171	34/17872	0.279048395054744	0.475299752282498	0.403738614041135	APOC1	1
GOBP_REGULATION_OF_NEUROBLAST_PROLIFERATION	GOBP_REGULATION_OF_NEUROBLAST_PROLIFERATION	GOBP_REGULATION_OF_NEUROBLAST_PROLIFERATION	1/171	34/17872	0.279048395054744	0.475299752282498	0.403738614041135	HIF1A	1
GOBP_REGULATION_OF_PROTEIN_TARGETING_TO_MEMBRANE	GOBP_REGULATION_OF_PROTEIN_TARGETING_TO_MEMBRANE	GOBP_REGULATION_OF_PROTEIN_TARGETING_TO_MEMBRANE	1/171	34/17872	0.279048395054744	0.475299752282498	0.403738614041135	ITGB2	1
GOBP_REGULATION_OF_T_CELL_APOPTOTIC_PROCESS	GOBP_REGULATION_OF_T_CELL_APOPTOTIC_PROCESS	GOBP_REGULATION_OF_T_CELL_APOPTOTIC_PROCESS	1/171	34/17872	0.279048395054744	0.475299752282498	0.403738614041135	HIF1A	1
GOBP_RESPONSE_TO_INTERLEUKIN_4	GOBP_RESPONSE_TO_INTERLEUKIN_4	GOBP_RESPONSE_TO_INTERLEUKIN_4	1/171	34/17872	0.279048395054744	0.475299752282498	0.403738614041135	RPL3	1
GOBP_INTEGRIN_MEDIATED_SIGNALING_PATHWAY	GOBP_INTEGRIN_MEDIATED_SIGNALING_PATHWAY	GOBP_INTEGRIN_MEDIATED_SIGNALING_PATHWAY	2/171	109/17872	0.28013434023239	0.475623771905353	0.404013849264434	CD63/ITGB2	2
GOBP_LEUKOCYTE_APOPTOTIC_PROCESS	GOBP_LEUKOCYTE_APOPTOTIC_PROCESS	GOBP_LEUKOCYTE_APOPTOTIC_PROCESS	2/171	109/17872	0.28013434023239	0.475623771905353	0.404013849264434	HIF1A/RPS6	2
GOBP_ORGANELLE_MEMBRANE_FUSION	GOBP_ORGANELLE_MEMBRANE_FUSION	GOBP_ORGANELLE_MEMBRANE_FUSION	2/171	109/17872	0.28013434023239	0.475623771905353	0.404013849264434	VAMP8/STX3	2
GOBP_STRESS_FIBER_ASSEMBLY	GOBP_STRESS_FIBER_ASSEMBLY	GOBP_STRESS_FIBER_ASSEMBLY	2/171	109/17872	0.28013434023239	0.475623771905353	0.404013849264434	PFN1/ACTG1	2
GOBP_DNA_BIOSYNTHETIC_PROCESS	GOBP_DNA_BIOSYNTHETIC_PROCESS	GOBP_DNA_BIOSYNTHETIC_PROCESS	3/171	193/17872	0.281452255718265	0.477098636189621	0.405266657958673	NOP10/HSP90AA1/POLE4	3
GOBP_LOCOMOTORY_BEHAVIOR	GOBP_LOCOMOTORY_BEHAVIOR	GOBP_LOCOMOTORY_BEHAVIOR	3/171	193/17872	0.281452255718265	0.477098636189621	0.405266657958673	APOE/CSTB/PPT1	3
GOBP_CELLULAR_RESPONSE_TO_INTERLEUKIN_1	GOBP_CELLULAR_RESPONSE_TO_INTERLEUKIN_1	GOBP_CELLULAR_RESPONSE_TO_INTERLEUKIN_1	2/171	110/17872	0.283678508744908	0.480106097668673	0.407821315989744	HIF1A/PYCARD	2
GOBP_REGULATION_OF_POTASSIUM_ION_TRANSPORT	GOBP_REGULATION_OF_POTASSIUM_ION_TRANSPORT	GOBP_REGULATION_OF_POTASSIUM_ION_TRANSPORT	2/171	110/17872	0.283678508744908	0.480106097668673	0.407821315989744	CD63/OXSR1	2
GOBP_BONE_CELL_DEVELOPMENT	GOBP_BONE_CELL_DEVELOPMENT	GOBP_BONE_CELL_DEVELOPMENT	1/171	35/17872	0.285959636474501	0.480520781544178	0.408173565054377	TYROBP	1
GOBP_CENTRAL_NERVOUS_SYSTEM_NEURON_AXONOGENESIS	GOBP_CENTRAL_NERVOUS_SYSTEM_NEURON_AXONOGENESIS	GOBP_CENTRAL_NERVOUS_SYSTEM_NEURON_AXONOGENESIS	1/171	35/17872	0.285959636474501	0.480520781544178	0.408173565054377	HSP90AA1	1
GOBP_LONG_TERM_MEMORY	GOBP_LONG_TERM_MEMORY	GOBP_LONG_TERM_MEMORY	1/171	35/17872	0.285959636474501	0.480520781544178	0.408173565054377	APOE	1
GOBP_NEGATIVE_REGULATION_OF_FATTY_ACID_METABOLIC_PROCESS	GOBP_NEGATIVE_REGULATION_OF_FATTY_ACID_METABOLIC_PROCESS	GOBP_NEGATIVE_REGULATION_OF_FATTY_ACID_METABOLIC_PROCESS	1/171	35/17872	0.285959636474501	0.480520781544178	0.408173565054377	APOC1	1
GOBP_NEGATIVE_REGULATION_OF_MACROAUTOPHAGY	GOBP_NEGATIVE_REGULATION_OF_MACROAUTOPHAGY	GOBP_NEGATIVE_REGULATION_OF_MACROAUTOPHAGY	1/171	35/17872	0.285959636474501	0.480520781544178	0.408173565054377	USP36	1
GOBP_PROTEIN_KINASE_A_SIGNALING	GOBP_PROTEIN_KINASE_A_SIGNALING	GOBP_PROTEIN_KINASE_A_SIGNALING	1/171	35/17872	0.285959636474501	0.480520781544178	0.408173565054377	EZR	1
GOBP_REGULATION_OF_HOMOTYPIC_CELL_CELL_ADHESION	GOBP_REGULATION_OF_HOMOTYPIC_CELL_CELL_ADHESION	GOBP_REGULATION_OF_HOMOTYPIC_CELL_CELL_ADHESION	1/171	35/17872	0.285959636474501	0.480520781544178	0.408173565054377	CD9	1
GOBP_TETRAPYRROLE_BIOSYNTHETIC_PROCESS	GOBP_TETRAPYRROLE_BIOSYNTHETIC_PROCESS	GOBP_TETRAPYRROLE_BIOSYNTHETIC_PROCESS	1/171	35/17872	0.285959636474501	0.480520781544178	0.408173565054377	TSPO	1
GOBP_VERY_LONG_CHAIN_FATTY_ACID_METABOLIC_PROCESS	GOBP_VERY_LONG_CHAIN_FATTY_ACID_METABOLIC_PROCESS	GOBP_VERY_LONG_CHAIN_FATTY_ACID_METABOLIC_PROCESS	1/171	35/17872	0.285959636474501	0.480520781544178	0.408173565054377	SLC27A4	1
GOBP_HOMEOSTASIS_OF_NUMBER_OF_CELLS	GOBP_HOMEOSTASIS_OF_NUMBER_OF_CELLS	GOBP_HOMEOSTASIS_OF_NUMBER_OF_CELLS	4/171	283/17872	0.286764760742769	0.481112442194029	0.408676145267403	HIF1A/RPS14/RPS6/RPS19	4
GOBP_STRIATED_MUSCLE_CELL_DIFFERENTIATION	GOBP_STRIATED_MUSCLE_CELL_DIFFERENTIATION	GOBP_STRIATED_MUSCLE_CELL_DIFFERENTIATION	4/171	283/17872	0.286764760742769	0.481112442194029	0.408676145267403	GPX1/ACTG1/YBX1/CD9	4
GOBP_AUTOPHAGOSOME_ORGANIZATION	GOBP_AUTOPHAGOSOME_ORGANIZATION	GOBP_AUTOPHAGOSOME_ORGANIZATION	2/171	111/17872	0.287221161511756	0.481118097043352	0.408680948722522	GABARAP/MAP1LC3B	2
GOBP_POSITIVE_REGULATION_OF_ENDOTHELIAL_CELL_PROLIFERATION	GOBP_POSITIVE_REGULATION_OF_ENDOTHELIAL_CELL_PROLIFERATION	GOBP_POSITIVE_REGULATION_OF_ENDOTHELIAL_CELL_PROLIFERATION	2/171	111/17872	0.287221161511756	0.481118097043352	0.408680948722522	CYBA/HIF1A	2
GOBP_CYTOSKELETON_DEPENDENT_INTRACELLULAR_TRANSPORT	GOBP_CYTOSKELETON_DEPENDENT_INTRACELLULAR_TRANSPORT	GOBP_CYTOSKELETON_DEPENDENT_INTRACELLULAR_TRANSPORT	3/171	196/17872	0.289257702287036	0.481360555893225	0.408886902964113	HIF1A/TUBA1A/HSPA8	3
GOBP_RESPONSE_TO_STARVATION	GOBP_RESPONSE_TO_STARVATION	GOBP_RESPONSE_TO_STARVATION	3/171	196/17872	0.289257702287036	0.481360555893225	0.408886902964113	GABARAP/HSPA8/MAP1LC3B	3
GOBP_RNA_LOCALIZATION	GOBP_RNA_LOCALIZATION	GOBP_RNA_LOCALIZATION	3/171	196/17872	0.289257702287036	0.481360555893225	0.408886902964113	NOP10/RANBP2/YBX1	3
GOBP_CELLULAR_COMPONENT_ASSEMBLY_INVOLVED_IN_MORPHOGENESIS	GOBP_CELLULAR_COMPONENT_ASSEMBLY_INVOLVED_IN_MORPHOGENESIS	GOBP_CELLULAR_COMPONENT_ASSEMBLY_INVOLVED_IN_MORPHOGENESIS	2/171	112/17872	0.290762004610097	0.481360555893225	0.408886902964113	ACTG1/CD9	2
GOBP_NEGATIVE_REGULATION_OF_IMMUNE_EFFECTOR_PROCESS	GOBP_NEGATIVE_REGULATION_OF_IMMUNE_EFFECTOR_PROCESS	GOBP_NEGATIVE_REGULATION_OF_IMMUNE_EFFECTOR_PROCESS	2/171	112/17872	0.290762004610097	0.481360555893225	0.408886902964113	GRN/RPS19	2
GOBP_FERTILIZATION	GOBP_FERTILIZATION	GOBP_FERTILIZATION	3/171	197/17872	0.291863382961193	0.481360555893225	0.408886902964113	FNDC3A/ALDOA/CD9	3
GOBP_REGULATION_OF_SYNAPTIC_PLASTICITY	GOBP_REGULATION_OF_SYNAPTIC_PLASTICITY	GOBP_REGULATION_OF_SYNAPTIC_PLASTICITY	3/171	197/17872	0.291863382961193	0.481360555893225	0.408886902964113	TYROBP/APOE/STX3	3
GOBP_CELLULAR_RESPONSE_TO_ALKALOID	GOBP_CELLULAR_RESPONSE_TO_ALKALOID	GOBP_CELLULAR_RESPONSE_TO_ALKALOID	1/171	36/17872	0.292805008575352	0.481360555893225	0.408886902964113	AIF1	1
GOBP_GRANULOCYTE_DIFFERENTIATION	GOBP_GRANULOCYTE_DIFFERENTIATION	GOBP_GRANULOCYTE_DIFFERENTIATION	1/171	36/17872	0.292805008575352	0.481360555893225	0.408886902964113	C1QC	1
GOBP_LUNG_EPITHELIUM_DEVELOPMENT	GOBP_LUNG_EPITHELIUM_DEVELOPMENT	GOBP_LUNG_EPITHELIUM_DEVELOPMENT	1/171	36/17872	0.292805008575352	0.481360555893225	0.408886902964113	LTA4H	1
GOBP_NEGATIVE_REGULATION_OF_ACTIN_FILAMENT_BUNDLE_ASSEMBLY	GOBP_NEGATIVE_REGULATION_OF_ACTIN_FILAMENT_BUNDLE_ASSEMBLY	GOBP_NEGATIVE_REGULATION_OF_ACTIN_FILAMENT_BUNDLE_ASSEMBLY	1/171	36/17872	0.292805008575352	0.481360555893225	0.408886902964113	PFN1	1
GOBP_NEGATIVE_REGULATION_OF_DNA_REPAIR	GOBP_NEGATIVE_REGULATION_OF_DNA_REPAIR	GOBP_NEGATIVE_REGULATION_OF_DNA_REPAIR	1/171	36/17872	0.292805008575352	0.481360555893225	0.408886902964113	RPS3	1
GOBP_NEGATIVE_REGULATION_OF_OSSIFICATION	GOBP_NEGATIVE_REGULATION_OF_OSSIFICATION	GOBP_NEGATIVE_REGULATION_OF_OSSIFICATION	1/171	36/17872	0.292805008575352	0.481360555893225	0.408886902964113	HIF1A	1
GOBP_NEGATIVE_REGULATION_OF_PROTEASOMAL_UBIQUITIN_DEPENDENT_PROTEIN_CATABOLIC_PROCESS	GOBP_NEGATIVE_REGULATION_OF_PROTEASOMAL_UBIQUITIN_DEPENDENT_PROTEIN_CATABOLIC_PROCESS	GOBP_NEGATIVE_REGULATION_OF_PROTEASOMAL_UBIQUITIN_DEPENDENT_PROTEIN_CATABOLIC_PROCESS	1/171	36/17872	0.292805008575352	0.481360555893225	0.408886902964113	RPL11	1
GOBP_PIGMENT_CELL_DIFFERENTIATION	GOBP_PIGMENT_CELL_DIFFERENTIATION	GOBP_PIGMENT_CELL_DIFFERENTIATION	1/171	36/17872	0.292805008575352	0.481360555893225	0.408886902964113	CD63	1
GOBP_POSITIVE_REGULATION_OF_BLOOD_PRESSURE	GOBP_POSITIVE_REGULATION_OF_BLOOD_PRESSURE	GOBP_POSITIVE_REGULATION_OF_BLOOD_PRESSURE	1/171	36/17872	0.292805008575352	0.481360555893225	0.408886902964113	CYBA	1
GOBP_POSITIVE_REGULATION_OF_DENDRITIC_SPINE_DEVELOPMENT	GOBP_POSITIVE_REGULATION_OF_DENDRITIC_SPINE_DEVELOPMENT	GOBP_POSITIVE_REGULATION_OF_DENDRITIC_SPINE_DEVELOPMENT	1/171	36/17872	0.292805008575352	0.481360555893225	0.408886902964113	APOE	1
GOBP_POSITIVE_REGULATION_OF_ESTABLISHMENT_OF_PROTEIN_LOCALIZATION_TO_MITOCHONDRION	GOBP_POSITIVE_REGULATION_OF_ESTABLISHMENT_OF_PROTEIN_LOCALIZATION_TO_MITOCHONDRION	GOBP_POSITIVE_REGULATION_OF_ESTABLISHMENT_OF_PROTEIN_LOCALIZATION_TO_MITOCHONDRION	1/171	36/17872	0.292805008575352	0.481360555893225	0.408886902964113	USP36	1
GOBP_POSITIVE_REGULATION_OF_LAMELLIPODIUM_ORGANIZATION	GOBP_POSITIVE_REGULATION_OF_LAMELLIPODIUM_ORGANIZATION	GOBP_POSITIVE_REGULATION_OF_LAMELLIPODIUM_ORGANIZATION	1/171	36/17872	0.292805008575352	0.481360555893225	0.408886902964113	ARPC2	1
GOBP_POSTSYNAPTIC_MEMBRANE_ORGANIZATION	GOBP_POSTSYNAPTIC_MEMBRANE_ORGANIZATION	GOBP_POSTSYNAPTIC_MEMBRANE_ORGANIZATION	1/171	36/17872	0.292805008575352	0.481360555893225	0.408886902964113	APOE	1
GOBP_PROTEIN_LOCALIZATION_TO_POSTSYNAPSE	GOBP_PROTEIN_LOCALIZATION_TO_POSTSYNAPSE	GOBP_PROTEIN_LOCALIZATION_TO_POSTSYNAPSE	1/171	36/17872	0.292805008575352	0.481360555893225	0.408886902964113	STX3	1
GOBP_REGULATION_OF_HORMONE_METABOLIC_PROCESS	GOBP_REGULATION_OF_HORMONE_METABOLIC_PROCESS	GOBP_REGULATION_OF_HORMONE_METABOLIC_PROCESS	1/171	36/17872	0.292805008575352	0.481360555893225	0.408886902964113	HIF1A	1
GOBP_VESICLE_DOCKING_INVOLVED_IN_EXOCYTOSIS	GOBP_VESICLE_DOCKING_INVOLVED_IN_EXOCYTOSIS	GOBP_VESICLE_DOCKING_INVOLVED_IN_EXOCYTOSIS	1/171	36/17872	0.292805008575352	0.481360555893225	0.408886902964113	STXBP2	1
GOBP_VIRION_ASSEMBLY	GOBP_VIRION_ASSEMBLY	GOBP_VIRION_ASSEMBLY	1/171	36/17872	0.292805008575352	0.481360555893225	0.408886902964113	APOE	1
GOBP_ACUTE_INFLAMMATORY_RESPONSE	GOBP_ACUTE_INFLAMMATORY_RESPONSE	GOBP_ACUTE_INFLAMMATORY_RESPONSE	2/171	113/17872	0.294300749814223	0.483350780952978	0.410577479707307	S100A8/GSTP1	2
GOBP_VESICLE_MEDIATED_TRANSPORT_IN_SYNAPSE	GOBP_VESICLE_MEDIATED_TRANSPORT_IN_SYNAPSE	GOBP_VESICLE_MEDIATED_TRANSPORT_IN_SYNAPSE	3/171	198/17872	0.294470767680392	0.483350780952978	0.410577479707307	ACTB/ACTG1/STX3	3
GOBP_NEGATIVE_REGULATION_OF_PROTEIN_LOCALIZATION	GOBP_NEGATIVE_REGULATION_OF_PROTEIN_LOCALIZATION	GOBP_NEGATIVE_REGULATION_OF_PROTEIN_LOCALIZATION	3/171	199/17872	0.2970797209985	0.486482284225489	0.413237503797447	APOE/TMEM59/CD36	3
GOBP_HUMORAL_IMMUNE_RESPONSE_MEDIATED_BY_CIRCULATING_IMMUNOGLOBULIN	GOBP_HUMORAL_IMMUNE_RESPONSE_MEDIATED_BY_CIRCULATING_IMMUNOGLOBULIN	GOBP_HUMORAL_IMMUNE_RESPONSE_MEDIATED_BY_CIRCULATING_IMMUNOGLOBULIN	2/171	114/17872	0.297837114514558	0.486482284225489	0.413237503797447	C1QB/C1QC	2
GOBP_RENAL_SYSTEM_PROCESS	GOBP_RENAL_SYSTEM_PROCESS	GOBP_RENAL_SYSTEM_PROCESS	2/171	114/17872	0.297837114514558	0.486482284225489	0.413237503797447	CYBA/SULF2	2
GOBP_C21_STEROID_HORMONE_METABOLIC_PROCESS	GOBP_C21_STEROID_HORMONE_METABOLIC_PROCESS	GOBP_C21_STEROID_HORMONE_METABOLIC_PROCESS	1/171	37/17872	0.299585135483493	0.486482284225489	0.413237503797447	TSPO	1
GOBP_DETECTION_OF_BIOTIC_STIMULUS	GOBP_DETECTION_OF_BIOTIC_STIMULUS	GOBP_DETECTION_OF_BIOTIC_STIMULUS	1/171	37/17872	0.299585135483493	0.486482284225489	0.413237503797447	TSPO	1
GOBP_DOPAMINERGIC_NEURON_DIFFERENTIATION	GOBP_DOPAMINERGIC_NEURON_DIFFERENTIATION	GOBP_DOPAMINERGIC_NEURON_DIFFERENTIATION	1/171	37/17872	0.299585135483493	0.486482284225489	0.413237503797447	HIF1A	1
GOBP_ERYTHROCYTE_DEVELOPMENT	GOBP_ERYTHROCYTE_DEVELOPMENT	GOBP_ERYTHROCYTE_DEVELOPMENT	1/171	37/17872	0.299585135483493	0.486482284225489	0.413237503797447	RPS6	1
GOBP_MEMBRANE_LIPID_CATABOLIC_PROCESS	GOBP_MEMBRANE_LIPID_CATABOLIC_PROCESS	GOBP_MEMBRANE_LIPID_CATABOLIC_PROCESS	1/171	37/17872	0.299585135483493	0.486482284225489	0.413237503797447	PPT1	1
GOBP_PHOSPHATIDIC_ACID_METABOLIC_PROCESS	GOBP_PHOSPHATIDIC_ACID_METABOLIC_PROCESS	GOBP_PHOSPHATIDIC_ACID_METABOLIC_PROCESS	1/171	37/17872	0.299585135483493	0.486482284225489	0.413237503797447	GPAT3	1
GOBP_POSITIVE_REGULATION_OF_DOUBLE_STRAND_BREAK_REPAIR_VIA_HOMOLOGOUS_RECOMBINATION	GOBP_POSITIVE_REGULATION_OF_DOUBLE_STRAND_BREAK_REPAIR_VIA_HOMOLOGOUS_RECOMBINATION	GOBP_POSITIVE_REGULATION_OF_DOUBLE_STRAND_BREAK_REPAIR_VIA_HOMOLOGOUS_RECOMBINATION	1/171	37/17872	0.299585135483493	0.486482284225489	0.413237503797447	ACTB	1
GOBP_POSITIVE_REGULATION_OF_MICROTUBULE_POLYMERIZATION_OR_DEPOLYMERIZATION	GOBP_POSITIVE_REGULATION_OF_MICROTUBULE_POLYMERIZATION_OR_DEPOLYMERIZATION	GOBP_POSITIVE_REGULATION_OF_MICROTUBULE_POLYMERIZATION_OR_DEPOLYMERIZATION	1/171	37/17872	0.299585135483493	0.486482284225489	0.413237503797447	RPS3	1
GOBP_POSITIVE_REGULATION_OF_RNA_SPLICING	GOBP_POSITIVE_REGULATION_OF_RNA_SPLICING	GOBP_POSITIVE_REGULATION_OF_RNA_SPLICING	1/171	37/17872	0.299585135483493	0.486482284225489	0.413237503797447	HSPA8	1
GOBP_REGULATION_OF_PHOSPHOLIPID_METABOLIC_PROCESS	GOBP_REGULATION_OF_PHOSPHOLIPID_METABOLIC_PROCESS	GOBP_REGULATION_OF_PHOSPHOLIPID_METABOLIC_PROCESS	1/171	37/17872	0.299585135483493	0.486482284225489	0.413237503797447	APOC1	1
GOBP_RRNA_MODIFICATION	GOBP_RRNA_MODIFICATION	GOBP_RRNA_MODIFICATION	1/171	37/17872	0.299585135483493	0.486482284225489	0.413237503797447	NOP10	1
GOBP_POSITIVE_REGULATION_OF_ADAPTIVE_IMMUNE_RESPONSE	GOBP_POSITIVE_REGULATION_OF_ADAPTIVE_IMMUNE_RESPONSE	GOBP_POSITIVE_REGULATION_OF_ADAPTIVE_IMMUNE_RESPONSE	2/171	115/17872	0.301370821637669	0.489008117004132	0.415383047152881	PYCARD/MALT1	2
GOBP_AMIDE_TRANSPORT	GOBP_AMIDE_TRANSPORT	GOBP_AMIDE_TRANSPORT	4/171	290/17872	0.301767691221841	0.489278302408542	0.415612553438518	HIF1A/S100A8/SELENOT/SERP1	4
GOBP_ENDOTHELIAL_CELL_PROLIFERATION	GOBP_ENDOTHELIAL_CELL_PROLIFERATION	GOBP_ENDOTHELIAL_CELL_PROLIFERATION	3/171	201/17872	0.302301797249918	0.489770417512452	0.416030575684579	CYBA/HIF1A/APOE	3
GOBP_NEGATIVE_REGULATION_OF_PHOSPHORYLATION	GOBP_NEGATIVE_REGULATION_OF_PHOSPHORYLATION	GOBP_NEGATIVE_REGULATION_OF_PHOSPHORYLATION	5/171	383/17872	0.304901384189127	0.490265674218104	0.416451266532774	RACK1/APOE/PYCARD/DYNLL1/GSTP1	5
GOBP_POLYOL_METABOLIC_PROCESS	GOBP_POLYOL_METABOLIC_PROCESS	GOBP_POLYOL_METABOLIC_PROCESS	2/171	116/17872	0.304901599567276	0.490265674218104	0.416451266532774	INPP5A/TPI1	2
GOBP_ANTIGEN_PROCESSING_AND_PRESENTATION_OF_EXOGENOUS_PEPTIDE_ANTIGEN	GOBP_ANTIGEN_PROCESSING_AND_PRESENTATION_OF_EXOGENOUS_PEPTIDE_ANTIGEN	GOBP_ANTIGEN_PROCESSING_AND_PRESENTATION_OF_EXOGENOUS_PEPTIDE_ANTIGEN	1/171	38/17872	0.306300635446057	0.490265674218104	0.416451266532774	FCER1G	1
GOBP_FATTY_ACYL_COA_METABOLIC_PROCESS	GOBP_FATTY_ACYL_COA_METABOLIC_PROCESS	GOBP_FATTY_ACYL_COA_METABOLIC_PROCESS	1/171	38/17872	0.306300635446057	0.490265674218104	0.416451266532774	PPT1	1
GOBP_FEAR_RESPONSE	GOBP_FEAR_RESPONSE	GOBP_FEAR_RESPONSE	1/171	38/17872	0.306300635446057	0.490265674218104	0.416451266532774	APOE	1
GOBP_NEGATIVE_REGULATION_OF_INTERLEUKIN_8_PRODUCTION	GOBP_NEGATIVE_REGULATION_OF_INTERLEUKIN_8_PRODUCTION	GOBP_NEGATIVE_REGULATION_OF_INTERLEUKIN_8_PRODUCTION	1/171	38/17872	0.306300635446057	0.490265674218104	0.416451266532774	TMSB4X	1
GOBP_NEGATIVE_REGULATION_OF_JNK_CASCADE	GOBP_NEGATIVE_REGULATION_OF_JNK_CASCADE	GOBP_NEGATIVE_REGULATION_OF_JNK_CASCADE	1/171	38/17872	0.306300635446057	0.490265674218104	0.416451266532774	GSTP1	1
GOBP_NEGATIVE_REGULATION_OF_RECEPTOR_MEDIATED_ENDOCYTOSIS	GOBP_NEGATIVE_REGULATION_OF_RECEPTOR_MEDIATED_ENDOCYTOSIS	GOBP_NEGATIVE_REGULATION_OF_RECEPTOR_MEDIATED_ENDOCYTOSIS	1/171	38/17872	0.306300635446057	0.490265674218104	0.416451266532774	APOC1	1
GOBP_NUCLEOTIDE_TRANSPORT	GOBP_NUCLEOTIDE_TRANSPORT	GOBP_NUCLEOTIDE_TRANSPORT	1/171	38/17872	0.306300635446057	0.490265674218104	0.416451266532774	SLC25A6	1
GOBP_REGULATION_OF_CHOLESTEROL_METABOLIC_PROCESS	GOBP_REGULATION_OF_CHOLESTEROL_METABOLIC_PROCESS	GOBP_REGULATION_OF_CHOLESTEROL_METABOLIC_PROCESS	1/171	38/17872	0.306300635446057	0.490265674218104	0.416451266532774	APOE	1
GOBP_REGULATION_OF_FIBROBLAST_GROWTH_FACTOR_RECEPTOR_SIGNALING_PATHWAY	GOBP_REGULATION_OF_FIBROBLAST_GROWTH_FACTOR_RECEPTOR_SIGNALING_PATHWAY	GOBP_REGULATION_OF_FIBROBLAST_GROWTH_FACTOR_RECEPTOR_SIGNALING_PATHWAY	1/171	38/17872	0.306300635446057	0.490265674218104	0.416451266532774	SULF2	1
GOBP_REGULATION_OF_INTRINSIC_APOPTOTIC_SIGNALING_PATHWAY_IN_RESPONSE_TO_DNA_DAMAGE	GOBP_REGULATION_OF_INTRINSIC_APOPTOTIC_SIGNALING_PATHWAY_IN_RESPONSE_TO_DNA_DAMAGE	GOBP_REGULATION_OF_INTRINSIC_APOPTOTIC_SIGNALING_PATHWAY_IN_RESPONSE_TO_DNA_DAMAGE	1/171	38/17872	0.306300635446057	0.490265674218104	0.416451266532774	RPS3	1
GOBP_REGULATION_OF_NATURAL_KILLER_CELL_ACTIVATION	GOBP_REGULATION_OF_NATURAL_KILLER_CELL_ACTIVATION	GOBP_REGULATION_OF_NATURAL_KILLER_CELL_ACTIVATION	1/171	38/17872	0.306300635446057	0.490265674218104	0.416451266532774	TYROBP	1
GOBP_REGULATION_OF_SYSTEMIC_ARTERIAL_BLOOD_PRESSURE_BY_HORMONE	GOBP_REGULATION_OF_SYSTEMIC_ARTERIAL_BLOOD_PRESSURE_BY_HORMONE	GOBP_REGULATION_OF_SYSTEMIC_ARTERIAL_BLOOD_PRESSURE_BY_HORMONE	1/171	38/17872	0.306300635446057	0.490265674218104	0.416451266532774	CYBA	1
GOBP_REGULATION_OF_T_HELPER_CELL_DIFFERENTIATION	GOBP_REGULATION_OF_T_HELPER_CELL_DIFFERENTIATION	GOBP_REGULATION_OF_T_HELPER_CELL_DIFFERENTIATION	1/171	38/17872	0.306300635446057	0.490265674218104	0.416451266532774	MALT1	1
GOBP_T_CELL_CYTOKINE_PRODUCTION	GOBP_T_CELL_CYTOKINE_PRODUCTION	GOBP_T_CELL_CYTOKINE_PRODUCTION	1/171	38/17872	0.306300635446057	0.490265674218104	0.416451266532774	MALT1	1
GOBP_POSITIVE_REGULATION_OF_KINASE_ACTIVITY	GOBP_POSITIVE_REGULATION_OF_KINASE_ACTIVITY	GOBP_POSITIVE_REGULATION_OF_KINASE_ACTIVITY	6/171	477/17872	0.306610015536484	0.490391320029738	0.416557995109015	RPLP1/RPS3/RANBP2/HSP90AA1/FAM20A/MALT1	6
GOBP_REGULATION_OF_STRESS_ACTIVATED_PROTEIN_KINASE_SIGNALING_CASCADE	GOBP_REGULATION_OF_STRESS_ACTIVATED_PROTEIN_KINASE_SIGNALING_CASCADE	GOBP_REGULATION_OF_STRESS_ACTIVATED_PROTEIN_KINASE_SIGNALING_CASCADE	3/171	203/17872	0.307528550602508	0.490714294163839	0.416832342252364	PYCARD/EZR/GSTP1	3
GOBP_HORMONE_TRANSPORT	GOBP_HORMONE_TRANSPORT	GOBP_HORMONE_TRANSPORT	4/171	293/17872	0.308226652342274	0.490714294163839	0.416832342252364	VAMP8/HIF1A/SELENOT/SERP1	4
GOBP_CELLULAR_RESPONSE_TO_INTERFERON_GAMMA	GOBP_CELLULAR_RESPONSE_TO_INTERFERON_GAMMA	GOBP_CELLULAR_RESPONSE_TO_INTERFERON_GAMMA	2/171	117/17872	0.308429182066255	0.490714294163839	0.416832342252364	AIF1/ACTG1	2
GOBP_INTERFERON_GAMMA_PRODUCTION	GOBP_INTERFERON_GAMMA_PRODUCTION	GOBP_INTERFERON_GAMMA_PRODUCTION	2/171	117/17872	0.308429182066255	0.490714294163839	0.416832342252364	PYCARD/CD14	2
GOBP_MONOCARBOXYLIC_ACID_TRANSPORT	GOBP_MONOCARBOXYLIC_ACID_TRANSPORT	GOBP_MONOCARBOXYLIC_ACID_TRANSPORT	2/171	117/17872	0.308429182066255	0.490714294163839	0.416832342252364	CD36/SLC27A4	2
GOBP_POSITIVE_REGULATION_OF_TRANSPORTER_ACTIVITY	GOBP_POSITIVE_REGULATION_OF_TRANSPORTER_ACTIVITY	GOBP_POSITIVE_REGULATION_OF_TRANSPORTER_ACTIVITY	2/171	117/17872	0.308429182066255	0.490714294163839	0.416832342252364	TMSB4X/NDUFA4	2
GOBP_REGULATION_OF_MYELOID_LEUKOCYTE_DIFFERENTIATION	GOBP_REGULATION_OF_MYELOID_LEUKOCYTE_DIFFERENTIATION	GOBP_REGULATION_OF_MYELOID_LEUKOCYTE_DIFFERENTIATION	2/171	117/17872	0.308429182066255	0.490714294163839	0.416832342252364	TYROBP/C1QC	2
GOBP_AXON_DEVELOPMENT	GOBP_AXON_DEVELOPMENT	GOBP_AXON_DEVELOPMENT	6/171	479/17872	0.30995761778915	0.492776931275565	0.418584428687838	TSPO/ACTB/GRN/APOE/HSP90AA1/S100A6	6
GOBP_MUSCLE_ADAPTATION	GOBP_MUSCLE_ADAPTATION	GOBP_MUSCLE_ADAPTATION	2/171	118/17872	0.311953308199625	0.493474613780397	0.419177068103677	CYBA/AIF1	2
GOBP_FOAM_CELL_DIFFERENTIATION	GOBP_FOAM_CELL_DIFFERENTIATION	GOBP_FOAM_CELL_DIFFERENTIATION	1/171	39/17872	0.312952120886156	0.493474613780397	0.419177068103677	CD36	1
GOBP_MYOTUBE_CELL_DEVELOPMENT	GOBP_MYOTUBE_CELL_DEVELOPMENT	GOBP_MYOTUBE_CELL_DEVELOPMENT	1/171	39/17872	0.312952120886156	0.493474613780397	0.419177068103677	GPX1	1
GOBP_NEGATIVE_REGULATION_OF_CYTOKINE_PRODUCTION_INVOLVED_IN_INFLAMMATORY_RESPONSE	GOBP_NEGATIVE_REGULATION_OF_CYTOKINE_PRODUCTION_INVOLVED_IN_INFLAMMATORY_RESPONSE	GOBP_NEGATIVE_REGULATION_OF_CYTOKINE_PRODUCTION_INVOLVED_IN_INFLAMMATORY_RESPONSE	1/171	39/17872	0.312952120886156	0.493474613780397	0.419177068103677	PYCARD	1
GOBP_NEGATIVE_REGULATION_OF_POTASSIUM_ION_TRANSPORT	GOBP_NEGATIVE_REGULATION_OF_POTASSIUM_ION_TRANSPORT	GOBP_NEGATIVE_REGULATION_OF_POTASSIUM_ION_TRANSPORT	1/171	39/17872	0.312952120886156	0.493474613780397	0.419177068103677	OXSR1	1
GOBP_NEGATIVE_REGULATION_OF_SMOOTH_MUSCLE_CELL_MIGRATION	GOBP_NEGATIVE_REGULATION_OF_SMOOTH_MUSCLE_CELL_MIGRATION	GOBP_NEGATIVE_REGULATION_OF_SMOOTH_MUSCLE_CELL_MIGRATION	1/171	39/17872	0.312952120886156	0.493474613780397	0.419177068103677	AIF1	1
GOBP_POSITIVE_REGULATION_OF_CD4_POSITIVE_ALPHA_BETA_T_CELL_ACTIVATION	GOBP_POSITIVE_REGULATION_OF_CD4_POSITIVE_ALPHA_BETA_T_CELL_ACTIVATION	GOBP_POSITIVE_REGULATION_OF_CD4_POSITIVE_ALPHA_BETA_T_CELL_ACTIVATION	1/171	39/17872	0.312952120886156	0.493474613780397	0.419177068103677	MALT1	1
GOBP_POSITIVE_REGULATION_OF_INTERFERON_BETA_PRODUCTION	GOBP_POSITIVE_REGULATION_OF_INTERFERON_BETA_PRODUCTION	GOBP_POSITIVE_REGULATION_OF_INTERFERON_BETA_PRODUCTION	1/171	39/17872	0.312952120886156	0.493474613780397	0.419177068103677	HSP90AA1	1
GOBP_REGULATION_OF_LEUKOCYTE_ADHESION_TO_VASCULAR_ENDOTHELIAL_CELL	GOBP_REGULATION_OF_LEUKOCYTE_ADHESION_TO_VASCULAR_ENDOTHELIAL_CELL	GOBP_REGULATION_OF_LEUKOCYTE_ADHESION_TO_VASCULAR_ENDOTHELIAL_CELL	1/171	39/17872	0.312952120886156	0.493474613780397	0.419177068103677	ITGB2	1
GOBP_RESPONSE_TO_PROGESTERONE	GOBP_RESPONSE_TO_PROGESTERONE	GOBP_RESPONSE_TO_PROGESTERONE	1/171	39/17872	0.312952120886156	0.493474613780397	0.419177068103677	TSPO	1
GOBP_T_CELL_HOMEOSTASIS	GOBP_T_CELL_HOMEOSTASIS	GOBP_T_CELL_HOMEOSTASIS	1/171	39/17872	0.312952120886156	0.493474613780397	0.419177068103677	RPS6	1
GOBP_GLYCOPROTEIN_METABOLIC_PROCESS	GOBP_GLYCOPROTEIN_METABOLIC_PROCESS	GOBP_GLYCOPROTEIN_METABOLIC_PROCESS	5/171	388/17872	0.314261559314057	0.495171774468143	0.420618704251361	HIF1A/SULF2/CST3/TMEM59/SERP1	5
GOBP_REGULATION_OF_EXOCYTOSIS	GOBP_REGULATION_OF_EXOCYTOSIS	GOBP_REGULATION_OF_EXOCYTOSIS	3/171	206/17872	0.315375173478882	0.496345323020023	0.42161556331466	VAMP8/ITGB2/STXBP2	3
GOBP_POSITIVE_REGULATION_OF_PROTEIN_KINASE_B_SIGNALING	GOBP_POSITIVE_REGULATION_OF_PROTEIN_KINASE_B_SIGNALING	GOBP_POSITIVE_REGULATION_OF_PROTEIN_KINASE_B_SIGNALING	2/171	119/17872	0.315473722258489	0.496345323020023	0.42161556331466	GPX1/HSP90AA1	2
GOBP_PHOSPHOLIPID_METABOLIC_PROCESS	GOBP_PHOSPHOLIPID_METABOLIC_PROCESS	GOBP_PHOSPHOLIPID_METABOLIC_PROCESS	5/171	389/17872	0.316138427769512	0.49702296120092	0.422191176280294	APOC1/DBI/GPAT3/FABP5/INPP5A	5
GOBP_REGULATION_OF_ION_TRANSMEMBRANE_TRANSPORT	GOBP_REGULATION_OF_ION_TRANSMEMBRANE_TRANSPORT	GOBP_REGULATION_OF_ION_TRANSMEMBRANE_TRANSPORT	6/171	483/17872	0.316671862097573	0.497422231184853	0.422530332169114	TMSB4X/CYBA/CD63/OXSR1/NDUFA4/FXYD5	6
GOBP_POSITIVE_REGULATION_OF_CELL_DEVELOPMENT	GOBP_POSITIVE_REGULATION_OF_CELL_DEVELOPMENT	GOBP_POSITIVE_REGULATION_OF_CELL_DEVELOPMENT	4/171	297/17872	0.316860771559843	0.497422231184853	0.422530332169114	TYROBP/HIF1A/TSPO/ARPC2	4
GOBP_CELL_CELL_JUNCTION_ORGANIZATION	GOBP_CELL_CELL_JUNCTION_ORGANIZATION	GOBP_CELL_CELL_JUNCTION_ORGANIZATION	3/171	207/17872	0.317991934542707	0.497948188938792	0.422977101715279	ACTB/ACTG1/CD9	3
GOBP_RESPONSE_TO_ETHANOL	GOBP_RESPONSE_TO_ETHANOL	GOBP_RESPONSE_TO_ETHANOL	2/171	120/17872	0.318990173684946	0.497948188938792	0.422977101715279	CD14/S100A8	2
GOBP_CELLULAR_CARBOHYDRATE_CATABOLIC_PROCESS	GOBP_CELLULAR_CARBOHYDRATE_CATABOLIC_PROCESS	GOBP_CELLULAR_CARBOHYDRATE_CATABOLIC_PROCESS	1/171	40/17872	0.319540198457426	0.497948188938792	0.422977101715279	TPI1	1
GOBP_CORTICAL_ACTIN_CYTOSKELETON_ORGANIZATION	GOBP_CORTICAL_ACTIN_CYTOSKELETON_ORGANIZATION	GOBP_CORTICAL_ACTIN_CYTOSKELETON_ORGANIZATION	1/171	40/17872	0.319540198457426	0.497948188938792	0.422977101715279	EZR	1
GOBP_ENERGY_HOMEOSTASIS	GOBP_ENERGY_HOMEOSTASIS	GOBP_ENERGY_HOMEOSTASIS	1/171	40/17872	0.319540198457426	0.497948188938792	0.422977101715279	CD36	1
GOBP_HISTONE_DEUBIQUITINATION	GOBP_HISTONE_DEUBIQUITINATION	GOBP_HISTONE_DEUBIQUITINATION	1/171	40/17872	0.319540198457426	0.497948188938792	0.422977101715279	USP36	1
GOBP_NEGATIVE_REGULATION_OF_CELLULAR_RESPONSE_TO_INSULIN_STIMULUS	GOBP_NEGATIVE_REGULATION_OF_CELLULAR_RESPONSE_TO_INSULIN_STIMULUS	GOBP_NEGATIVE_REGULATION_OF_CELLULAR_RESPONSE_TO_INSULIN_STIMULUS	1/171	40/17872	0.319540198457426	0.497948188938792	0.422977101715279	SLC27A4	1
GOBP_NEGATIVE_REGULATION_OF_NIK_NF_KAPPAB_SIGNALING	GOBP_NEGATIVE_REGULATION_OF_NIK_NF_KAPPAB_SIGNALING	GOBP_NEGATIVE_REGULATION_OF_NIK_NF_KAPPAB_SIGNALING	1/171	40/17872	0.319540198457426	0.497948188938792	0.422977101715279	TMSB4X	1
GOBP_T_HELPER_17_TYPE_IMMUNE_RESPONSE	GOBP_T_HELPER_17_TYPE_IMMUNE_RESPONSE	GOBP_T_HELPER_17_TYPE_IMMUNE_RESPONSE	1/171	40/17872	0.319540198457426	0.497948188938792	0.422977101715279	MALT1	1
GOBP_TRIGLYCERIDE_BIOSYNTHETIC_PROCESS	GOBP_TRIGLYCERIDE_BIOSYNTHETIC_PROCESS	GOBP_TRIGLYCERIDE_BIOSYNTHETIC_PROCESS	1/171	40/17872	0.319540198457426	0.497948188938792	0.422977101715279	GPAT3	1
GOBP_NEUROTRANSMITTER_TRANSPORT	GOBP_NEUROTRANSMITTER_TRANSPORT	GOBP_NEUROTRANSMITTER_TRANSPORT	3/171	208/17872	0.32060909592565	0.499247595121759	0.424080869282731	STXBP2/PPT1/STX3	3
GOBP_AXON_EXTENSION	GOBP_AXON_EXTENSION	GOBP_AXON_EXTENSION	2/171	121/17872	0.322502416997933	0.500406832633149	0.425065571976022	APOE/HSP90AA1	2
GOBP_REGULATION_OF_DNA_BINDING	GOBP_REGULATION_OF_DNA_BINDING	GOBP_REGULATION_OF_DNA_BINDING	2/171	121/17872	0.322502416997933	0.500406832633149	0.425065571976022	TMSB4X/EDF1	2
GOBP_POSITIVE_REGULATION_OF_EPITHELIAL_CELL_PROLIFERATION	GOBP_POSITIVE_REGULATION_OF_EPITHELIAL_CELL_PROLIFERATION	GOBP_POSITIVE_REGULATION_OF_EPITHELIAL_CELL_PROLIFERATION	3/171	209/17872	0.323226533497003	0.500406832633149	0.425065571976022	CYBA/HIF1A/GRN	3
GOBP_REGULATION_OF_MYELOID_CELL_DIFFERENTIATION	GOBP_REGULATION_OF_MYELOID_CELL_DIFFERENTIATION	GOBP_REGULATION_OF_MYELOID_CELL_DIFFERENTIATION	3/171	209/17872	0.323226533497003	0.500406832633149	0.425065571976022	TYROBP/HIF1A/C1QC	3
GOBP_AMINE_METABOLIC_PROCESS	GOBP_AMINE_METABOLIC_PROCESS	GOBP_AMINE_METABOLIC_PROCESS	2/171	122/17872	0.326010211720015	0.500406832633149	0.425065571976022	OAZ1/ITGB2	2
GOBP_CARBOHYDRATE_TRANSMEMBRANE_TRANSPORT	GOBP_CARBOHYDRATE_TRANSMEMBRANE_TRANSPORT	GOBP_CARBOHYDRATE_TRANSMEMBRANE_TRANSPORT	2/171	122/17872	0.326010211720015	0.500406832633149	0.425065571976022	SLC27A4/FABP5	2
GOBP_POSITIVE_REGULATION_OF_CELL_SUBSTRATE_ADHESION	GOBP_POSITIVE_REGULATION_OF_CELL_SUBSTRATE_ADHESION	GOBP_POSITIVE_REGULATION_OF_CELL_SUBSTRATE_ADHESION	2/171	122/17872	0.326010211720015	0.500406832633149	0.425065571976022	CD36/ARPC2	2
GOBP_POSITIVE_REGULATION_OF_PRODUCTION_OF_MOLECULAR_MEDIATOR_OF_IMMUNE_RESPONSE	GOBP_POSITIVE_REGULATION_OF_PRODUCTION_OF_MOLECULAR_MEDIATOR_OF_IMMUNE_RESPONSE	GOBP_POSITIVE_REGULATION_OF_PRODUCTION_OF_MOLECULAR_MEDIATOR_OF_IMMUNE_RESPONSE	2/171	122/17872	0.326010211720015	0.500406832633149	0.425065571976022	CD36/MALT1	2
GOBP_AMINE_BIOSYNTHETIC_PROCESS	GOBP_AMINE_BIOSYNTHETIC_PROCESS	GOBP_AMINE_BIOSYNTHETIC_PROCESS	1/171	41/17872	0.32606546909806	0.500406832633149	0.425065571976022	OAZ1	1
GOBP_AMINO_SUGAR_METABOLIC_PROCESS	GOBP_AMINO_SUGAR_METABOLIC_PROCESS	GOBP_AMINO_SUGAR_METABOLIC_PROCESS	1/171	41/17872	0.32606546909806	0.500406832633149	0.425065571976022	NPL	1
GOBP_BINDING_OF_SPERM_TO_ZONA_PELLUCIDA	GOBP_BINDING_OF_SPERM_TO_ZONA_PELLUCIDA	GOBP_BINDING_OF_SPERM_TO_ZONA_PELLUCIDA	1/171	41/17872	0.32606546909806	0.500406832633149	0.425065571976022	ALDOA	1
GOBP_MAINTENANCE_OF_PROTEIN_LOCALIZATION_IN_ORGANELLE	GOBP_MAINTENANCE_OF_PROTEIN_LOCALIZATION_IN_ORGANELLE	GOBP_MAINTENANCE_OF_PROTEIN_LOCALIZATION_IN_ORGANELLE	1/171	41/17872	0.32606546909806	0.500406832633149	0.425065571976022	TSPO	1
GOBP_NEGATIVE_REGULATION_OF_GLIOGENESIS	GOBP_NEGATIVE_REGULATION_OF_GLIOGENESIS	GOBP_NEGATIVE_REGULATION_OF_GLIOGENESIS	1/171	41/17872	0.32606546909806	0.500406832633149	0.425065571976022	TSPO	1
GOBP_NEGATIVE_REGULATION_OF_STRIATED_MUSCLE_CELL_DIFFERENTIATION	GOBP_NEGATIVE_REGULATION_OF_STRIATED_MUSCLE_CELL_DIFFERENTIATION	GOBP_NEGATIVE_REGULATION_OF_STRIATED_MUSCLE_CELL_DIFFERENTIATION	1/171	41/17872	0.32606546909806	0.500406832633149	0.425065571976022	YBX1	1
GOBP_POSITIVE_REGULATION_OF_INTERLEUKIN_10_PRODUCTION	GOBP_POSITIVE_REGULATION_OF_INTERLEUKIN_10_PRODUCTION	GOBP_POSITIVE_REGULATION_OF_INTERLEUKIN_10_PRODUCTION	1/171	41/17872	0.32606546909806	0.500406832633149	0.425065571976022	PYCARD	1
GOBP_REGULATION_OF_LAMELLIPODIUM_ASSEMBLY	GOBP_REGULATION_OF_LAMELLIPODIUM_ASSEMBLY	GOBP_REGULATION_OF_LAMELLIPODIUM_ASSEMBLY	1/171	41/17872	0.32606546909806	0.500406832633149	0.425065571976022	ARPC2	1
GOBP_REGULATION_OF_MACROPHAGE_MIGRATION	GOBP_REGULATION_OF_MACROPHAGE_MIGRATION	GOBP_REGULATION_OF_MACROPHAGE_MIGRATION	1/171	41/17872	0.32606546909806	0.500406832633149	0.425065571976022	CD9	1
GOBP_REGULATION_OF_TRANSCRIPTION_ELONGATION_FROM_RNA_POLYMERASE_II_PROMOTER	GOBP_REGULATION_OF_TRANSCRIPTION_ELONGATION_FROM_RNA_POLYMERASE_II_PROMOTER	GOBP_REGULATION_OF_TRANSCRIPTION_ELONGATION_FROM_RNA_POLYMERASE_II_PROMOTER	1/171	41/17872	0.32606546909806	0.500406832633149	0.425065571976022	SUPT4H1	1
GOBP_RESPONSE_TO_TESTOSTERONE	GOBP_RESPONSE_TO_TESTOSTERONE	GOBP_RESPONSE_TO_TESTOSTERONE	1/171	41/17872	0.32606546909806	0.500406832633149	0.425065571976022	TSPO	1
GOBP_STEROID_HORMONE_BIOSYNTHETIC_PROCESS	GOBP_STEROID_HORMONE_BIOSYNTHETIC_PROCESS	GOBP_STEROID_HORMONE_BIOSYNTHETIC_PROCESS	1/171	41/17872	0.32606546909806	0.500406832633149	0.425065571976022	TSPO	1
GOBP_SECOND_MESSENGER_MEDIATED_SIGNALING	GOBP_SECOND_MESSENGER_MEDIATED_SIGNALING	GOBP_SECOND_MESSENGER_MEDIATED_SIGNALING	4/171	302/17872	0.327682286132335	0.502525036639047	0.4268648591532	DDAH2/APOE/CD36/INPP5A	4
GOBP_CELLULAR_KETONE_METABOLIC_PROCESS	GOBP_CELLULAR_KETONE_METABOLIC_PROCESS	GOBP_CELLULAR_KETONE_METABOLIC_PROCESS	3/171	211/17872	0.328461746388245	0.503070031560665	0.427327799630776	APOC1/FABP5/TPI1	3
GOBP_ANTIMICROBIAL_HUMORAL_RESPONSE	GOBP_ANTIMICROBIAL_HUMORAL_RESPONSE	GOBP_ANTIMICROBIAL_HUMORAL_RESPONSE	2/171	123/17872	0.329513322305087	0.503070031560665	0.427327799630776	S100A9/RPS19	2
GOBP_NEGATIVE_REGULATION_OF_DNA_METABOLIC_PROCESS	GOBP_NEGATIVE_REGULATION_OF_DNA_METABOLIC_PROCESS	GOBP_NEGATIVE_REGULATION_OF_DNA_METABOLIC_PROCESS	2/171	123/17872	0.329513322305087	0.503070031560665	0.427327799630776	RPS3/SUB1	2
GOBP_POSITIVE_REGULATION_OF_MRNA_METABOLIC_PROCESS	GOBP_POSITIVE_REGULATION_OF_MRNA_METABOLIC_PROCESS	GOBP_POSITIVE_REGULATION_OF_MRNA_METABOLIC_PROCESS	2/171	123/17872	0.329513322305087	0.503070031560665	0.427327799630776	HSPA8/YBX1	2
GOBP_REGULATION_OF_CELL_MATRIX_ADHESION	GOBP_REGULATION_OF_CELL_MATRIX_ADHESION	GOBP_REGULATION_OF_CELL_MATRIX_ADHESION	2/171	123/17872	0.329513322305087	0.503070031560665	0.427327799630776	ACTG1/CD36	2
GOBP_B_CELL_MEDIATED_IMMUNITY	GOBP_B_CELL_MEDIATED_IMMUNITY	GOBP_B_CELL_MEDIATED_IMMUNITY	3/171	212/17872	0.331079279154964	0.503070031560665	0.427327799630776	FCER1G/C1QB/C1QC	3
GOBP_POSITIVE_REGULATION_OF_PROTEIN_KINASE_ACTIVITY	GOBP_POSITIVE_REGULATION_OF_PROTEIN_KINASE_ACTIVITY	GOBP_POSITIVE_REGULATION_OF_PROTEIN_KINASE_ACTIVITY	5/171	397/17872	0.33120298537357	0.503070031560665	0.427327799630776	RPLP1/RPS3/HSP90AA1/FAM20A/MALT1	5
GOBP_POSITIVE_REGULATION_OF_MAPK_CASCADE	GOBP_POSITIVE_REGULATION_OF_MAPK_CASCADE	GOBP_POSITIVE_REGULATION_OF_MAPK_CASCADE	6/171	492/17872	0.331861179345937	0.503070031560665	0.427327799630776	RPS3/APOE/PYCARD/LAMTOR2/AVPI1/CD36	6
GOBP_ACYLGLYCEROL_HOMEOSTASIS	GOBP_ACYLGLYCEROL_HOMEOSTASIS	GOBP_ACYLGLYCEROL_HOMEOSTASIS	1/171	42/17872	0.332528528084333	0.503070031560665	0.427327799630776	APOE	1
GOBP_COLLAGEN_CATABOLIC_PROCESS	GOBP_COLLAGEN_CATABOLIC_PROCESS	GOBP_COLLAGEN_CATABOLIC_PROCESS	1/171	42/17872	0.332528528084333	0.503070031560665	0.427327799630776	CST3	1
GOBP_DOPAMINE_METABOLIC_PROCESS	GOBP_DOPAMINE_METABOLIC_PROCESS	GOBP_DOPAMINE_METABOLIC_PROCESS	1/171	42/17872	0.332528528084333	0.503070031560665	0.427327799630776	ITGB2	1
GOBP_GOLGI_TO_PLASMA_MEMBRANE_PROTEIN_TRANSPORT	GOBP_GOLGI_TO_PLASMA_MEMBRANE_PROTEIN_TRANSPORT	GOBP_GOLGI_TO_PLASMA_MEMBRANE_PROTEIN_TRANSPORT	1/171	42/17872	0.332528528084333	0.503070031560665	0.427327799630776	RACK1	1
GOBP_MULTICELLULAR_ORGANISM_AGING	GOBP_MULTICELLULAR_ORGANISM_AGING	GOBP_MULTICELLULAR_ORGANISM_AGING	1/171	42/17872	0.332528528084333	0.503070031560665	0.427327799630776	SERP1	1
GOBP_POSITIVE_REGULATION_OF_INTERLEUKIN_12_PRODUCTION	GOBP_POSITIVE_REGULATION_OF_INTERLEUKIN_12_PRODUCTION	GOBP_POSITIVE_REGULATION_OF_INTERLEUKIN_12_PRODUCTION	1/171	42/17872	0.332528528084333	0.503070031560665	0.427327799630776	CD36	1
GOBP_POSITIVE_REGULATION_OF_SUBSTRATE_ADHESION_DEPENDENT_CELL_SPREADING	GOBP_POSITIVE_REGULATION_OF_SUBSTRATE_ADHESION_DEPENDENT_CELL_SPREADING	GOBP_POSITIVE_REGULATION_OF_SUBSTRATE_ADHESION_DEPENDENT_CELL_SPREADING	1/171	42/17872	0.332528528084333	0.503070031560665	0.427327799630776	ARPC2	1
GOBP_PROTEIN_PEPTIDYL_PROLYL_ISOMERIZATION	GOBP_PROTEIN_PEPTIDYL_PROLYL_ISOMERIZATION	GOBP_PROTEIN_PEPTIDYL_PROLYL_ISOMERIZATION	1/171	42/17872	0.332528528084333	0.503070031560665	0.427327799630776	RANBP2	1
GOBP_REGULATION_OF_NUCLEOTIDE_BIOSYNTHETIC_PROCESS	GOBP_REGULATION_OF_NUCLEOTIDE_BIOSYNTHETIC_PROCESS	GOBP_REGULATION_OF_NUCLEOTIDE_BIOSYNTHETIC_PROCESS	1/171	42/17872	0.332528528084333	0.503070031560665	0.427327799630776	TMSB4X	1
GOBP_REGULATION_OF_TRIGLYCERIDE_METABOLIC_PROCESS	GOBP_REGULATION_OF_TRIGLYCERIDE_METABOLIC_PROCESS	GOBP_REGULATION_OF_TRIGLYCERIDE_METABOLIC_PROCESS	1/171	42/17872	0.332528528084333	0.503070031560665	0.427327799630776	APOE	1
GOBP_MYOTUBE_DIFFERENTIATION	GOBP_MYOTUBE_DIFFERENTIATION	GOBP_MYOTUBE_DIFFERENTIATION	2/171	124/17872	0.333011518066994	0.503070031560665	0.427327799630776	GPX1/CD9	2
GOBP_NEGATIVE_REGULATION_OF_PROTEIN_CATABOLIC_PROCESS	GOBP_NEGATIVE_REGULATION_OF_PROTEIN_CATABOLIC_PROCESS	GOBP_NEGATIVE_REGULATION_OF_PROTEIN_CATABOLIC_PROCESS	2/171	124/17872	0.333011518066994	0.503070031560665	0.427327799630776	RPL11/CST3	2
GOBP_REGULATION_OF_LEUKOCYTE_CHEMOTAXIS	GOBP_REGULATION_OF_LEUKOCYTE_CHEMOTAXIS	GOBP_REGULATION_OF_LEUKOCYTE_CHEMOTAXIS	2/171	124/17872	0.333011518066994	0.503070031560665	0.427327799630776	AIF1/OXSR1	2
GOBP_REGULATION_OF_NEUROTRANSMITTER_LEVELS	GOBP_REGULATION_OF_NEUROTRANSMITTER_LEVELS	GOBP_REGULATION_OF_NEUROTRANSMITTER_LEVELS	3/171	214/17872	0.336313599517553	0.507697288823939	0.431258376967109	STXBP2/PPT1/STX3	3
GOBP_BASE_EXCISION_REPAIR	GOBP_BASE_EXCISION_REPAIR	GOBP_BASE_EXCISION_REPAIR	1/171	43/17872	0.338929965083636	0.508036444325394	0.431546469210886	RPS3	1
GOBP_CALCIUM_DEPENDENT_CELL_CELL_ADHESION_VIA_PLASMA_MEMBRANE_CELL_ADHESION_MOLECULES	GOBP_CALCIUM_DEPENDENT_CELL_CELL_ADHESION_VIA_PLASMA_MEMBRANE_CELL_ADHESION_MOLECULES	GOBP_CALCIUM_DEPENDENT_CELL_CELL_ADHESION_VIA_PLASMA_MEMBRANE_CELL_ADHESION_MOLECULES	1/171	43/17872	0.338929965083636	0.508036444325394	0.431546469210886	FXYD5	1
GOBP_DE_NOVO_PROTEIN_FOLDING	GOBP_DE_NOVO_PROTEIN_FOLDING	GOBP_DE_NOVO_PROTEIN_FOLDING	1/171	43/17872	0.338929965083636	0.508036444325394	0.431546469210886	HSPA8	1
GOBP_INTRINSIC_APOPTOTIC_SIGNALING_PATHWAY_IN_RESPONSE_TO_DNA_DAMAGE_BY_P53_CLASS_MEDIATOR	GOBP_INTRINSIC_APOPTOTIC_SIGNALING_PATHWAY_IN_RESPONSE_TO_DNA_DAMAGE_BY_P53_CLASS_MEDIATOR	GOBP_INTRINSIC_APOPTOTIC_SIGNALING_PATHWAY_IN_RESPONSE_TO_DNA_DAMAGE_BY_P53_CLASS_MEDIATOR	1/171	43/17872	0.338929965083636	0.508036444325394	0.431546469210886	PYCARD	1
GOBP_KETONE_BIOSYNTHETIC_PROCESS	GOBP_KETONE_BIOSYNTHETIC_PROCESS	GOBP_KETONE_BIOSYNTHETIC_PROCESS	1/171	43/17872	0.338929965083636	0.508036444325394	0.431546469210886	TPI1	1
GOBP_NEGATIVE_REGULATION_OF_INTRACELLULAR_PROTEIN_TRANSPORT	GOBP_NEGATIVE_REGULATION_OF_INTRACELLULAR_PROTEIN_TRANSPORT	GOBP_NEGATIVE_REGULATION_OF_INTRACELLULAR_PROTEIN_TRANSPORT	1/171	43/17872	0.338929965083636	0.508036444325394	0.431546469210886	CD36	1
GOBP_POSITIVE_REGULATION_OF_JUN_KINASE_ACTIVITY	GOBP_POSITIVE_REGULATION_OF_JUN_KINASE_ACTIVITY	GOBP_POSITIVE_REGULATION_OF_JUN_KINASE_ACTIVITY	1/171	43/17872	0.338929965083636	0.508036444325394	0.431546469210886	RPS3	1
GOBP_REGULATION_OF_COLLAGEN_METABOLIC_PROCESS	GOBP_REGULATION_OF_COLLAGEN_METABOLIC_PROCESS	GOBP_REGULATION_OF_COLLAGEN_METABOLIC_PROCESS	1/171	43/17872	0.338929965083636	0.508036444325394	0.431546469210886	CST3	1
GOBP_SARCOMERE_ORGANIZATION	GOBP_SARCOMERE_ORGANIZATION	GOBP_SARCOMERE_ORGANIZATION	1/171	43/17872	0.338929965083636	0.508036444325394	0.431546469210886	ACTG1	1
GOBP_MONOCARBOXYLIC_ACID_BIOSYNTHETIC_PROCESS	GOBP_MONOCARBOXYLIC_ACID_BIOSYNTHETIC_PROCESS	GOBP_MONOCARBOXYLIC_ACID_BIOSYNTHETIC_PROCESS	3/171	215/17872	0.338930151416706	0.508036444325394	0.431546469210886	APOC1/FABP5/GSTP1	3
GOBP_NUCLEAR_TRANSPORT	GOBP_NUCLEAR_TRANSPORT	GOBP_NUCLEAR_TRANSPORT	4/171	308/17872	0.340698308888835	0.510326662961837	0.433491872493106	RPS15/RANBP2/CD36/MALT1	4
GOBP_PROTEIN_KINASE_B_SIGNALING	GOBP_PROTEIN_KINASE_B_SIGNALING	GOBP_PROTEIN_KINASE_B_SIGNALING	3/171	216/17872	0.341546142567677	0.511236086549504	0.434264373250991	GPX1/RACK1/HSP90AA1	3
GOBP_REGULATION_OF_METAL_ION_TRANSPORT	GOBP_REGULATION_OF_METAL_ION_TRANSPORT	GOBP_REGULATION_OF_METAL_ION_TRANSPORT	5/171	403/17872	0.342548946061971	0.512376029180019	0.435232686100978	CYBA/TSPO/CD63/OXSR1/FXYD5	5
GOBP_LIPID_MODIFICATION	GOBP_LIPID_MODIFICATION	GOBP_LIPID_MODIFICATION	3/171	217/17872	0.344161457978076	0.512730657200834	0.435533921321355	APOE/APOC1/INPP5A	3
GOBP_REGULATION_OF_CELL_SUBSTRATE_ADHESION	GOBP_REGULATION_OF_CELL_SUBSTRATE_ADHESION	GOBP_REGULATION_OF_CELL_SUBSTRATE_ADHESION	3/171	217/17872	0.344161457978076	0.512730657200834	0.435533921321355	ACTG1/CD36/ARPC2	3
GOBP_RESPONSE_TO_LIGHT_STIMULUS	GOBP_RESPONSE_TO_LIGHT_STIMULUS	GOBP_RESPONSE_TO_LIGHT_STIMULUS	4/171	310/17872	0.345041813470222	0.512730657200834	0.435533921321355	GPX1/HIF1A/MAP4K3/CARD16	4
GOBP_COLUMNAR_CUBOIDAL_EPITHELIAL_CELL_DEVELOPMENT	GOBP_COLUMNAR_CUBOIDAL_EPITHELIAL_CELL_DEVELOPMENT	GOBP_COLUMNAR_CUBOIDAL_EPITHELIAL_CELL_DEVELOPMENT	1/171	44/17872	0.345270364207014	0.512730657200834	0.435533921321355	HIF1A	1
GOBP_GLIAL_CELL_PROLIFERATION	GOBP_GLIAL_CELL_PROLIFERATION	GOBP_GLIAL_CELL_PROLIFERATION	1/171	44/17872	0.345270364207014	0.512730657200834	0.435533921321355	TSPO	1
GOBP_LACTATION	GOBP_LACTATION	GOBP_LACTATION	1/171	44/17872	0.345270364207014	0.512730657200834	0.435533921321355	HIF1A	1
GOBP_NEGATIVE_REGULATION_OF_RESPONSE_TO_ENDOPLASMIC_RETICULUM_STRESS	GOBP_NEGATIVE_REGULATION_OF_RESPONSE_TO_ENDOPLASMIC_RETICULUM_STRESS	GOBP_NEGATIVE_REGULATION_OF_RESPONSE_TO_ENDOPLASMIC_RETICULUM_STRESS	1/171	44/17872	0.345270364207014	0.512730657200834	0.435533921321355	RACK1	1
GOBP_POSITIVE_REGULATION_OF_PATTERN_RECOGNITION_RECEPTOR_SIGNALING_PATHWAY	GOBP_POSITIVE_REGULATION_OF_PATTERN_RECOGNITION_RECEPTOR_SIGNALING_PATHWAY	GOBP_POSITIVE_REGULATION_OF_PATTERN_RECOGNITION_RECEPTOR_SIGNALING_PATHWAY	1/171	44/17872	0.345270364207014	0.512730657200834	0.435533921321355	CYBA	1
GOBP_REGULATION_OF_DENDRITIC_SPINE_MORPHOGENESIS	GOBP_REGULATION_OF_DENDRITIC_SPINE_MORPHOGENESIS	GOBP_REGULATION_OF_DENDRITIC_SPINE_MORPHOGENESIS	1/171	44/17872	0.345270364207014	0.512730657200834	0.435533921321355	CFL1	1
GOBP_TOLL_LIKE_RECEPTOR_4_SIGNALING_PATHWAY	GOBP_TOLL_LIKE_RECEPTOR_4_SIGNALING_PATHWAY	GOBP_TOLL_LIKE_RECEPTOR_4_SIGNALING_PATHWAY	1/171	44/17872	0.345270364207014	0.512730657200834	0.435533921321355	CD14	1
GOBP_REGULATION_OF_CELL_DEVELOPMENT	GOBP_REGULATION_OF_CELL_DEVELOPMENT	GOBP_REGULATION_OF_CELL_DEVELOPMENT	6/171	500/17872	0.345441417351409	0.512730657200834	0.435533921321355	TYROBP/HIF1A/TSPO/GRN/ARPC2/RPS19	6
GOBP_BONE_DEVELOPMENT	GOBP_BONE_DEVELOPMENT	GOBP_BONE_DEVELOPMENT	3/171	218/17872	0.346775983796895	0.513535399396252	0.436217501519069	TYROBP/RPL13/SULF2	3
GOBP_GLIAL_CELL_DIFFERENTIATION	GOBP_GLIAL_CELL_DIFFERENTIATION	GOBP_GLIAL_CELL_DIFFERENTIATION	3/171	218/17872	0.346775983796895	0.513535399396252	0.436217501519069	GRN/S100A9/S100A8	3
GOBP_NUCLEOBASE_CONTAINING_COMPOUND_TRANSPORT	GOBP_NUCLEOBASE_CONTAINING_COMPOUND_TRANSPORT	GOBP_NUCLEOBASE_CONTAINING_COMPOUND_TRANSPORT	3/171	218/17872	0.346775983796895	0.513535399396252	0.436217501519069	RANBP2/SLC25A6/YBX1	3
GOBP_NEGATIVE_REGULATION_OF_ESTABLISHMENT_OF_PROTEIN_LOCALIZATION	GOBP_NEGATIVE_REGULATION_OF_ESTABLISHMENT_OF_PROTEIN_LOCALIZATION	GOBP_NEGATIVE_REGULATION_OF_ESTABLISHMENT_OF_PROTEIN_LOCALIZATION	2/171	128/17872	0.34695070533598	0.513535399396252	0.436217501519069	APOE/CD36	2
GOBP_POSITIVE_REGULATION_OF_RESPONSE_TO_DNA_DAMAGE_STIMULUS	GOBP_POSITIVE_REGULATION_OF_RESPONSE_TO_DNA_DAMAGE_STIMULUS	GOBP_POSITIVE_REGULATION_OF_RESPONSE_TO_DNA_DAMAGE_STIMULUS	2/171	129/17872	0.350421031903861	0.514974296156351	0.437439757960147	ACTB/RPS3	2
GOBP_MYOBLAST_FUSION	GOBP_MYOBLAST_FUSION	GOBP_MYOBLAST_FUSION	1/171	45/17872	0.35155030406121	0.514974296156351	0.437439757960147	CD9	1
GOBP_NEGATIVE_REGULATION_OF_ACTIN_FILAMENT_DEPOLYMERIZATION	GOBP_NEGATIVE_REGULATION_OF_ACTIN_FILAMENT_DEPOLYMERIZATION	GOBP_NEGATIVE_REGULATION_OF_ACTIN_FILAMENT_DEPOLYMERIZATION	1/171	45/17872	0.35155030406121	0.514974296156351	0.437439757960147	CAPG	1
GOBP_NEGATIVE_REGULATION_OF_LIPID_TRANSPORT	GOBP_NEGATIVE_REGULATION_OF_LIPID_TRANSPORT	GOBP_NEGATIVE_REGULATION_OF_LIPID_TRANSPORT	1/171	45/17872	0.35155030406121	0.514974296156351	0.437439757960147	APOC1	1
GOBP_NEGATIVE_REGULATION_OF_TOR_SIGNALING	GOBP_NEGATIVE_REGULATION_OF_TOR_SIGNALING	GOBP_NEGATIVE_REGULATION_OF_TOR_SIGNALING	1/171	45/17872	0.35155030406121	0.514974296156351	0.437439757960147	HIF1A	1
GOBP_NEUROINFLAMMATORY_RESPONSE	GOBP_NEUROINFLAMMATORY_RESPONSE	GOBP_NEUROINFLAMMATORY_RESPONSE	1/171	45/17872	0.35155030406121	0.514974296156351	0.437439757960147	GRN	1
GOBP_POSITIVE_REGULATION_OF_ATP_DEPENDENT_ACTIVITY	GOBP_POSITIVE_REGULATION_OF_ATP_DEPENDENT_ACTIVITY	GOBP_POSITIVE_REGULATION_OF_ATP_DEPENDENT_ACTIVITY	1/171	45/17872	0.35155030406121	0.514974296156351	0.437439757960147	PFN1	1
GOBP_POSITIVE_REGULATION_OF_MIRNA_TRANSCRIPTION	GOBP_POSITIVE_REGULATION_OF_MIRNA_TRANSCRIPTION	GOBP_POSITIVE_REGULATION_OF_MIRNA_TRANSCRIPTION	1/171	45/17872	0.35155030406121	0.514974296156351	0.437439757960147	HIF1A	1
GOBP_POSITIVE_REGULATION_OF_SIGNALING_RECEPTOR_ACTIVITY	GOBP_POSITIVE_REGULATION_OF_SIGNALING_RECEPTOR_ACTIVITY	GOBP_POSITIVE_REGULATION_OF_SIGNALING_RECEPTOR_ACTIVITY	1/171	45/17872	0.35155030406121	0.514974296156351	0.437439757960147	HIF1A	1
GOBP_REGULATION_OF_GLYCOLYTIC_PROCESS	GOBP_REGULATION_OF_GLYCOLYTIC_PROCESS	GOBP_REGULATION_OF_GLYCOLYTIC_PROCESS	1/171	45/17872	0.35155030406121	0.514974296156351	0.437439757960147	HIF1A	1
GOBP_REGULATION_OF_INFLAMMATORY_RESPONSE_TO_ANTIGENIC_STIMULUS	GOBP_REGULATION_OF_INFLAMMATORY_RESPONSE_TO_ANTIGENIC_STIMULUS	GOBP_REGULATION_OF_INFLAMMATORY_RESPONSE_TO_ANTIGENIC_STIMULUS	1/171	45/17872	0.35155030406121	0.514974296156351	0.437439757960147	GPX1	1
GOBP_THIOESTER_BIOSYNTHETIC_PROCESS	GOBP_THIOESTER_BIOSYNTHETIC_PROCESS	GOBP_THIOESTER_BIOSYNTHETIC_PROCESS	1/171	45/17872	0.35155030406121	0.514974296156351	0.437439757960147	PPT1	1
GOBP_VESICLE_MEDIATED_TRANSPORT_BETWEEN_ENDOSOMAL_COMPARTMENTS	GOBP_VESICLE_MEDIATED_TRANSPORT_BETWEEN_ENDOSOMAL_COMPARTMENTS	GOBP_VESICLE_MEDIATED_TRANSPORT_BETWEEN_ENDOSOMAL_COMPARTMENTS	1/171	45/17872	0.35155030406121	0.514974296156351	0.437439757960147	EZR	1
GOBP_AGING	GOBP_AGING	GOBP_AGING	4/171	313/17872	0.351559665455136	0.514974296156351	0.437439757960147	GPX1/TSPO/YBX1/SERP1	4
GOBP_PROTEIN_MATURATION	GOBP_PROTEIN_MATURATION	GOBP_PROTEIN_MATURATION	4/171	313/17872	0.351559665455136	0.514974296156351	0.437439757960147	PYCARD/CIAO2B/TMEM59/CARD16	4
GOBP_CELLULAR_LIPID_CATABOLIC_PROCESS	GOBP_CELLULAR_LIPID_CATABOLIC_PROCESS	GOBP_CELLULAR_LIPID_CATABOLIC_PROCESS	3/171	220/17872	0.352002216957344	0.515267201114679	0.437688563143305	APOC1/SLC27A4/PPT1	3
GOBP_LEUKOCYTE_MEDIATED_CYTOTOXICITY	GOBP_LEUKOCYTE_MEDIATED_CYTOTOXICITY	GOBP_LEUKOCYTE_MEDIATED_CYTOTOXICITY	2/171	130/17872	0.353885157705413	0.517666718296348	0.439726808980048	TYROBP/STXBP2	2
GOBP_BLOOD_VESSEL_REMODELING	GOBP_BLOOD_VESSEL_REMODELING	GOBP_BLOOD_VESSEL_REMODELING	1/171	46/17872	0.357770357800231	0.521196323708978	0.442724996945777	CST3	1
GOBP_CLATHRIN_DEPENDENT_ENDOCYTOSIS	GOBP_CLATHRIN_DEPENDENT_ENDOCYTOSIS	GOBP_CLATHRIN_DEPENDENT_ENDOCYTOSIS	1/171	46/17872	0.357770357800231	0.521196323708978	0.442724996945777	AP2S1	1
GOBP_ENDODERMAL_CELL_DIFFERENTIATION	GOBP_ENDODERMAL_CELL_DIFFERENTIATION	GOBP_ENDODERMAL_CELL_DIFFERENTIATION	1/171	46/17872	0.357770357800231	0.521196323708978	0.442724996945777	ITGB2	1
GOBP_KILLING_OF_CELLS_OF_ANOTHER_ORGANISM	GOBP_KILLING_OF_CELLS_OF_ANOTHER_ORGANISM	GOBP_KILLING_OF_CELLS_OF_ANOTHER_ORGANISM	1/171	46/17872	0.357770357800231	0.521196323708978	0.442724996945777	RPS19	1
GOBP_PHOSPHOLIPID_DEPHOSPHORYLATION	GOBP_PHOSPHOLIPID_DEPHOSPHORYLATION	GOBP_PHOSPHOLIPID_DEPHOSPHORYLATION	1/171	46/17872	0.357770357800231	0.521196323708978	0.442724996945777	INPP5A	1
GOBP_RESPONSE_TO_ANTIBIOTIC	GOBP_RESPONSE_TO_ANTIBIOTIC	GOBP_RESPONSE_TO_ANTIBIOTIC	1/171	46/17872	0.357770357800231	0.521196323708978	0.442724996945777	HSP90AA1	1
GOBP_POSITIVE_REGULATION_OF_ERK1_AND_ERK2_CASCADE	GOBP_POSITIVE_REGULATION_OF_ERK1_AND_ERK2_CASCADE	GOBP_POSITIVE_REGULATION_OF_ERK1_AND_ERK2_CASCADE	3/171	223/17872	0.359832864005648	0.52384167453598	0.444972063710313	APOE/PYCARD/CD36	3
GOBP_REGULATION_OF_CELLULAR_KETONE_METABOLIC_PROCESS	GOBP_REGULATION_OF_CELLULAR_KETONE_METABOLIC_PROCESS	GOBP_REGULATION_OF_CELLULAR_KETONE_METABOLIC_PROCESS	2/171	132/17872	0.360794016966728	0.524521897356146	0.445549872171888	APOC1/FABP5	2
GOBP_TELOMERE_MAINTENANCE	GOBP_TELOMERE_MAINTENANCE	GOBP_TELOMERE_MAINTENANCE	2/171	132/17872	0.360794016966728	0.524521897356146	0.445549872171888	NOP10/HSP90AA1	2
GOBP_ANTIGEN_PROCESSING_AND_PRESENTATION_OF_EXOGENOUS_ANTIGEN	GOBP_ANTIGEN_PROCESSING_AND_PRESENTATION_OF_EXOGENOUS_ANTIGEN	GOBP_ANTIGEN_PROCESSING_AND_PRESENTATION_OF_EXOGENOUS_ANTIGEN	1/171	47/17872	0.363931093176432	0.52512883281708	0.446065427420198	FCER1G	1
GOBP_DEVELOPMENTAL_PIGMENTATION	GOBP_DEVELOPMENTAL_PIGMENTATION	GOBP_DEVELOPMENTAL_PIGMENTATION	1/171	47/17872	0.363931093176432	0.52512883281708	0.446065427420198	CD63	1
GOBP_FIBROBLAST_MIGRATION	GOBP_FIBROBLAST_MIGRATION	GOBP_FIBROBLAST_MIGRATION	1/171	47/17872	0.363931093176432	0.52512883281708	0.446065427420198	LAMTOR2	1
GOBP_INTRACELLULAR_LIPID_TRANSPORT	GOBP_INTRACELLULAR_LIPID_TRANSPORT	GOBP_INTRACELLULAR_LIPID_TRANSPORT	1/171	47/17872	0.363931093176432	0.52512883281708	0.446065427420198	NPC2	1
GOBP_LYMPHOCYTE_COSTIMULATION	GOBP_LYMPHOCYTE_COSTIMULATION	GOBP_LYMPHOCYTE_COSTIMULATION	1/171	47/17872	0.363931093176432	0.52512883281708	0.446065427420198	LGALS1	1
GOBP_MEMBRANE_PROTEIN_ECTODOMAIN_PROTEOLYSIS	GOBP_MEMBRANE_PROTEIN_ECTODOMAIN_PROTEOLYSIS	GOBP_MEMBRANE_PROTEIN_ECTODOMAIN_PROTEOLYSIS	1/171	47/17872	0.363931093176432	0.52512883281708	0.446065427420198	APOE	1
GOBP_NEGATIVE_REGULATION_OF_REACTIVE_OXYGEN_SPECIES_METABOLIC_PROCESS	GOBP_NEGATIVE_REGULATION_OF_REACTIVE_OXYGEN_SPECIES_METABOLIC_PROCESS	GOBP_NEGATIVE_REGULATION_OF_REACTIVE_OXYGEN_SPECIES_METABOLIC_PROCESS	1/171	47/17872	0.363931093176432	0.52512883281708	0.446065427420198	HIF1A	1
GOBP_POSITIVE_REGULATION_OF_DNA_TEMPLATED_TRANSCRIPTION_INITIATION	GOBP_POSITIVE_REGULATION_OF_DNA_TEMPLATED_TRANSCRIPTION_INITIATION	GOBP_POSITIVE_REGULATION_OF_DNA_TEMPLATED_TRANSCRIPTION_INITIATION	1/171	47/17872	0.363931093176432	0.52512883281708	0.446065427420198	SUB1	1
GOBP_PROTEIN_DESTABILIZATION	GOBP_PROTEIN_DESTABILIZATION	GOBP_PROTEIN_DESTABILIZATION	1/171	47/17872	0.363931093176432	0.52512883281708	0.446065427420198	SERF2	1
GOBP_REGULATION_OF_ACUTE_INFLAMMATORY_RESPONSE	GOBP_REGULATION_OF_ACUTE_INFLAMMATORY_RESPONSE	GOBP_REGULATION_OF_ACUTE_INFLAMMATORY_RESPONSE	1/171	47/17872	0.363931093176432	0.52512883281708	0.446065427420198	GSTP1	1
GOBP_REGULATION_OF_NECROTIC_CELL_DEATH	GOBP_REGULATION_OF_NECROTIC_CELL_DEATH	GOBP_REGULATION_OF_NECROTIC_CELL_DEATH	1/171	47/17872	0.363931093176432	0.52512883281708	0.446065427420198	TSPO	1
GOBP_ANATOMICAL_STRUCTURE_HOMEOSTASIS	GOBP_ANATOMICAL_STRUCTURE_HOMEOSTASIS	GOBP_ANATOMICAL_STRUCTURE_HOMEOSTASIS	4/171	319/17872	0.364597924019298	0.525733870072634	0.44657937025696	HIF1A/ACTB/ACTG1/ALDOA	4
GOBP_RESPONSE_TO_OXYGEN_LEVELS	GOBP_RESPONSE_TO_OXYGEN_LEVELS	GOBP_RESPONSE_TO_OXYGEN_LEVELS	4/171	320/17872	0.366770512989926	0.528507849111671	0.448935698967888	CYBA/HIF1A/CARD16/ATP6V1G1	4
GOBP_DNA_TEMPLATED_TRANSCRIPTION_INITIATION	GOBP_DNA_TEMPLATED_TRANSCRIPTION_INITIATION	GOBP_DNA_TEMPLATED_TRANSCRIPTION_INITIATION	2/171	134/17872	0.367675745857968	0.529094365990734	0.449433909856338	ELOB/SUB1	2
GOBP_REGULATION_OF_GENERATION_OF_PRECURSOR_METABOLITES_AND_ENERGY	GOBP_REGULATION_OF_GENERATION_OF_PRECURSOR_METABOLITES_AND_ENERGY	GOBP_REGULATION_OF_GENERATION_OF_PRECURSOR_METABOLITES_AND_ENERGY	2/171	134/17872	0.367675745857968	0.529094365990734	0.449433909856338	HIF1A/NDUFA4	2
GOBP_CELLULAR_RESPONSE_TO_AMYLOID_BETA	GOBP_CELLULAR_RESPONSE_TO_AMYLOID_BETA	GOBP_CELLULAR_RESPONSE_TO_AMYLOID_BETA	1/171	48/17872	0.370033072591121	0.529217559074837	0.449538554987744	CD36	1
GOBP_NEGATIVE_REGULATION_OF_DEPHOSPHORYLATION	GOBP_NEGATIVE_REGULATION_OF_DEPHOSPHORYLATION	GOBP_NEGATIVE_REGULATION_OF_DEPHOSPHORYLATION	1/171	48/17872	0.370033072591121	0.529217559074837	0.449538554987744	YWHAB	1
GOBP_NEUTRAL_LIPID_BIOSYNTHETIC_PROCESS	GOBP_NEUTRAL_LIPID_BIOSYNTHETIC_PROCESS	GOBP_NEUTRAL_LIPID_BIOSYNTHETIC_PROCESS	1/171	48/17872	0.370033072591121	0.529217559074837	0.449538554987744	GPAT3	1
GOBP_POSITIVE_REGULATION_OF_FIBROBLAST_PROLIFERATION	GOBP_POSITIVE_REGULATION_OF_FIBROBLAST_PROLIFERATION	GOBP_POSITIVE_REGULATION_OF_FIBROBLAST_PROLIFERATION	1/171	48/17872	0.370033072591121	0.529217559074837	0.449538554987744	S100A6	1
GOBP_REGULATION_OF_ERYTHROCYTE_DIFFERENTIATION	GOBP_REGULATION_OF_ERYTHROCYTE_DIFFERENTIATION	GOBP_REGULATION_OF_ERYTHROCYTE_DIFFERENTIATION	1/171	48/17872	0.370033072591121	0.529217559074837	0.449538554987744	HIF1A	1
GOBP_REGULATION_OF_P38MAPK_CASCADE	GOBP_REGULATION_OF_P38MAPK_CASCADE	GOBP_REGULATION_OF_P38MAPK_CASCADE	1/171	48/17872	0.370033072591121	0.529217559074837	0.449538554987744	EZR	1
GOBP_REGULATION_OF_SYSTEMIC_ARTERIAL_BLOOD_PRESSURE_MEDIATED_BY_A_CHEMICAL_SIGNAL	GOBP_REGULATION_OF_SYSTEMIC_ARTERIAL_BLOOD_PRESSURE_MEDIATED_BY_A_CHEMICAL_SIGNAL	GOBP_REGULATION_OF_SYSTEMIC_ARTERIAL_BLOOD_PRESSURE_MEDIATED_BY_A_CHEMICAL_SIGNAL	1/171	48/17872	0.370033072591121	0.529217559074837	0.449538554987744	CYBA	1
GOBP_REGULATION_OF_VASCULAR_PERMEABILITY	GOBP_REGULATION_OF_VASCULAR_PERMEABILITY	GOBP_REGULATION_OF_VASCULAR_PERMEABILITY	1/171	48/17872	0.370033072591121	0.529217559074837	0.449538554987744	APOE	1
GOBP_VISUAL_BEHAVIOR	GOBP_VISUAL_BEHAVIOR	GOBP_VISUAL_BEHAVIOR	1/171	48/17872	0.370033072591121	0.529217559074837	0.449538554987744	HIF1A	1
GOBP_NEGATIVE_REGULATION_OF_APOPTOTIC_SIGNALING_PATHWAY	GOBP_NEGATIVE_REGULATION_OF_APOPTOTIC_SIGNALING_PATHWAY	GOBP_NEGATIVE_REGULATION_OF_APOPTOTIC_SIGNALING_PATHWAY	3/171	227/17872	0.3702529627049	0.529217559074837	0.449538554987744	GPX1/HIF1A/GSTP1	3
GOBP_MAMMARY_GLAND_DEVELOPMENT	GOBP_MAMMARY_GLAND_DEVELOPMENT	GOBP_MAMMARY_GLAND_DEVELOPMENT	2/171	135/17872	0.371105974425217	0.530080087208582	0.450271220871994	GPX1/HIF1A	2
GOBP_ORGANIC_ACID_TRANSPORT	GOBP_ORGANIC_ACID_TRANSPORT	GOBP_ORGANIC_ACID_TRANSPORT	4/171	323/17872	0.373286182835005	0.532478074104467	0.452308166822805	APOE/CD36/SLC27A4/FABP5	4
GOBP_STEROID_METABOLIC_PROCESS	GOBP_STEROID_METABOLIC_PROCESS	GOBP_STEROID_METABOLIC_PROCESS	4/171	323/17872	0.373286182835005	0.532478074104467	0.452308166822805	NPC2/TSPO/APOE/APOC1	4
GOBP_ADULT_BEHAVIOR	GOBP_ADULT_BEHAVIOR	GOBP_ADULT_BEHAVIOR	2/171	136/17872	0.374528874227542	0.533176493873525	0.452901432500358	CSTB/PPT1	2
GOBP_EPITHELIAL_TUBE_FORMATION	GOBP_EPITHELIAL_TUBE_FORMATION	GOBP_EPITHELIAL_TUBE_FORMATION	2/171	136/17872	0.374528874227542	0.533176493873525	0.452901432500358	HIF1A/PFN1	2
GOBP_POSITIVE_REGULATION_OF_AUTOPHAGY	GOBP_POSITIVE_REGULATION_OF_AUTOPHAGY	GOBP_POSITIVE_REGULATION_OF_AUTOPHAGY	2/171	136/17872	0.374528874227542	0.533176493873525	0.452901432500358	HIF1A/TMEM59	2
GOBP_DIGESTIVE_TRACT_MORPHOGENESIS	GOBP_DIGESTIVE_TRACT_MORPHOGENESIS	GOBP_DIGESTIVE_TRACT_MORPHOGENESIS	1/171	49/17872	0.376076853144696	0.533592008069027	0.453254386871995	HIF1A	1
GOBP_MACROPHAGE_DIFFERENTIATION	GOBP_MACROPHAGE_DIFFERENTIATION	GOBP_MACROPHAGE_DIFFERENTIATION	1/171	49/17872	0.376076853144696	0.533592008069027	0.453254386871995	C1QC	1
GOBP_NEGATIVE_REGULATION_OF_MYELOID_LEUKOCYTE_DIFFERENTIATION	GOBP_NEGATIVE_REGULATION_OF_MYELOID_LEUKOCYTE_DIFFERENTIATION	GOBP_NEGATIVE_REGULATION_OF_MYELOID_LEUKOCYTE_DIFFERENTIATION	1/171	49/17872	0.376076853144696	0.533592008069027	0.453254386871995	C1QC	1
GOBP_NEGATIVE_REGULATION_OF_UBIQUITIN_DEPENDENT_PROTEIN_CATABOLIC_PROCESS	GOBP_NEGATIVE_REGULATION_OF_UBIQUITIN_DEPENDENT_PROTEIN_CATABOLIC_PROCESS	GOBP_NEGATIVE_REGULATION_OF_UBIQUITIN_DEPENDENT_PROTEIN_CATABOLIC_PROCESS	1/171	49/17872	0.376076853144696	0.533592008069027	0.453254386871995	RPL11	1
GOBP_RESPONSE_TO_NICOTINE	GOBP_RESPONSE_TO_NICOTINE	GOBP_RESPONSE_TO_NICOTINE	1/171	49/17872	0.376076853144696	0.533592008069027	0.453254386871995	GPX1	1
GOBP_CELLULAR_RESPONSE_TO_ABIOTIC_STIMULUS	GOBP_CELLULAR_RESPONSE_TO_ABIOTIC_STIMULUS	GOBP_CELLULAR_RESPONSE_TO_ABIOTIC_STIMULUS	4/171	325/17872	0.377627568817362	0.53493855222263	0.454398195316477	CYBA/TSPO/CARD16/OXSR1	4
GOBP_DIGESTION	GOBP_DIGESTION	GOBP_DIGESTION	2/171	137/17872	0.377944271658392	0.53493855222263	0.454398195316477	CD36/EZR	2
GOBP_POSITIVE_REGULATION_OF_DNA_METABOLIC_PROCESS	GOBP_POSITIVE_REGULATION_OF_DNA_METABOLIC_PROCESS	GOBP_POSITIVE_REGULATION_OF_DNA_METABOLIC_PROCESS	3/171	231/17872	0.380643234238431	0.53493855222263	0.454398195316477	ACTB/RPS3/HSP90AA1	3
GOBP_ADHERENS_JUNCTION_ORGANIZATION	GOBP_ADHERENS_JUNCTION_ORGANIZATION	GOBP_ADHERENS_JUNCTION_ORGANIZATION	1/171	50/17872	0.382062986686314	0.53493855222263	0.454398195316477	ACTB	1
GOBP_FATTY_ACID_DERIVATIVE_BIOSYNTHETIC_PROCESS	GOBP_FATTY_ACID_DERIVATIVE_BIOSYNTHETIC_PROCESS	GOBP_FATTY_ACID_DERIVATIVE_BIOSYNTHETIC_PROCESS	1/171	50/17872	0.382062986686314	0.53493855222263	0.454398195316477	PPT1	1
GOBP_MITOCHONDRION_LOCALIZATION	GOBP_MITOCHONDRION_LOCALIZATION	GOBP_MITOCHONDRION_LOCALIZATION	1/171	50/17872	0.382062986686314	0.53493855222263	0.454398195316477	HIF1A	1
GOBP_NCRNA_3_END_PROCESSING	GOBP_NCRNA_3_END_PROCESSING	GOBP_NCRNA_3_END_PROCESSING	1/171	50/17872	0.382062986686314	0.53493855222263	0.454398195316477	PTCD1	1
GOBP_NEGATIVE_REGULATION_OF_LEUKOCYTE_APOPTOTIC_PROCESS	GOBP_NEGATIVE_REGULATION_OF_LEUKOCYTE_APOPTOTIC_PROCESS	GOBP_NEGATIVE_REGULATION_OF_LEUKOCYTE_APOPTOTIC_PROCESS	1/171	50/17872	0.382062986686314	0.53493855222263	0.454398195316477	HIF1A	1
GOBP_NEGATIVE_REGULATION_OF_PROTEASOMAL_PROTEIN_CATABOLIC_PROCESS	GOBP_NEGATIVE_REGULATION_OF_PROTEASOMAL_PROTEIN_CATABOLIC_PROCESS	GOBP_NEGATIVE_REGULATION_OF_PROTEASOMAL_PROTEIN_CATABOLIC_PROCESS	1/171	50/17872	0.382062986686314	0.53493855222263	0.454398195316477	RPL11	1
GOBP_POSITIVE_REGULATION_OF_ALPHA_BETA_T_CELL_DIFFERENTIATION	GOBP_POSITIVE_REGULATION_OF_ALPHA_BETA_T_CELL_DIFFERENTIATION	GOBP_POSITIVE_REGULATION_OF_ALPHA_BETA_T_CELL_DIFFERENTIATION	1/171	50/17872	0.382062986686314	0.53493855222263	0.454398195316477	MALT1	1
GOBP_POSITIVE_REGULATION_OF_EXTRINSIC_APOPTOTIC_SIGNALING_PATHWAY	GOBP_POSITIVE_REGULATION_OF_EXTRINSIC_APOPTOTIC_SIGNALING_PATHWAY	GOBP_POSITIVE_REGULATION_OF_EXTRINSIC_APOPTOTIC_SIGNALING_PATHWAY	1/171	50/17872	0.382062986686314	0.53493855222263	0.454398195316477	PYCARD	1
GOBP_REGULATION_OF_CD4_POSITIVE_ALPHA_BETA_T_CELL_DIFFERENTIATION	GOBP_REGULATION_OF_CD4_POSITIVE_ALPHA_BETA_T_CELL_DIFFERENTIATION	GOBP_REGULATION_OF_CD4_POSITIVE_ALPHA_BETA_T_CELL_DIFFERENTIATION	1/171	50/17872	0.382062986686314	0.53493855222263	0.454398195316477	MALT1	1
GOBP_REGULATION_OF_CELLULAR_RESPIRATION	GOBP_REGULATION_OF_CELLULAR_RESPIRATION	GOBP_REGULATION_OF_CELLULAR_RESPIRATION	1/171	50/17872	0.382062986686314	0.53493855222263	0.454398195316477	HIF1A	1
GOBP_REGULATION_OF_ESTABLISHMENT_OF_PROTEIN_LOCALIZATION_TO_MITOCHONDRION	GOBP_REGULATION_OF_ESTABLISHMENT_OF_PROTEIN_LOCALIZATION_TO_MITOCHONDRION	GOBP_REGULATION_OF_ESTABLISHMENT_OF_PROTEIN_LOCALIZATION_TO_MITOCHONDRION	1/171	50/17872	0.382062986686314	0.53493855222263	0.454398195316477	USP36	1
GOBP_REGULATION_OF_EXTRACELLULAR_MATRIX_ORGANIZATION	GOBP_REGULATION_OF_EXTRACELLULAR_MATRIX_ORGANIZATION	GOBP_REGULATION_OF_EXTRACELLULAR_MATRIX_ORGANIZATION	1/171	50/17872	0.382062986686314	0.53493855222263	0.454398195316477	CST3	1
GOBP_REGULATION_OF_EXTRINSIC_APOPTOTIC_SIGNALING_PATHWAY_VIA_DEATH_DOMAIN_RECEPTORS	GOBP_REGULATION_OF_EXTRINSIC_APOPTOTIC_SIGNALING_PATHWAY_VIA_DEATH_DOMAIN_RECEPTORS	GOBP_REGULATION_OF_EXTRINSIC_APOPTOTIC_SIGNALING_PATHWAY_VIA_DEATH_DOMAIN_RECEPTORS	1/171	50/17872	0.382062986686314	0.53493855222263	0.454398195316477	GPX1	1
GOBP_REGULATION_OF_INSULIN_SECRETION_INVOLVED_IN_CELLULAR_RESPONSE_TO_GLUCOSE_STIMULUS	GOBP_REGULATION_OF_INSULIN_SECRETION_INVOLVED_IN_CELLULAR_RESPONSE_TO_GLUCOSE_STIMULUS	GOBP_REGULATION_OF_INSULIN_SECRETION_INVOLVED_IN_CELLULAR_RESPONSE_TO_GLUCOSE_STIMULUS	1/171	50/17872	0.382062986686314	0.53493855222263	0.454398195316477	HIF1A	1
GOBP_REGULATION_OF_NEURONAL_SYNAPTIC_PLASTICITY	GOBP_REGULATION_OF_NEURONAL_SYNAPTIC_PLASTICITY	GOBP_REGULATION_OF_NEURONAL_SYNAPTIC_PLASTICITY	1/171	50/17872	0.382062986686314	0.53493855222263	0.454398195316477	APOE	1
GOBP_REGULATION_OF_TELOMERASE_ACTIVITY	GOBP_REGULATION_OF_TELOMERASE_ACTIVITY	GOBP_REGULATION_OF_TELOMERASE_ACTIVITY	1/171	50/17872	0.382062986686314	0.53493855222263	0.454398195316477	HSP90AA1	1
GOBP_VASCULAR_ENDOTHELIAL_GROWTH_FACTOR_SIGNALING_PATHWAY	GOBP_VASCULAR_ENDOTHELIAL_GROWTH_FACTOR_SIGNALING_PATHWAY	GOBP_VASCULAR_ENDOTHELIAL_GROWTH_FACTOR_SIGNALING_PATHWAY	1/171	50/17872	0.382062986686314	0.53493855222263	0.454398195316477	CD63	1
GOBP_IMPORT_INTO_CELL	GOBP_IMPORT_INTO_CELL	GOBP_IMPORT_INTO_CELL	3/171	232/17872	0.383235387477541	0.536226589593082	0.455492305760007	ACTB/CD36/SLC27A4	3
GOBP_LIPID_CATABOLIC_PROCESS	GOBP_LIPID_CATABOLIC_PROCESS	GOBP_LIPID_CATABOLIC_PROCESS	4/171	328/17872	0.384134783831349	0.537131192138108	0.456260711331508	APOE/APOC1/SLC27A4/PPT1	4
GOBP_RESPONSE_TO_INTERFERON_GAMMA	GOBP_RESPONSE_TO_INTERFERON_GAMMA	GOBP_RESPONSE_TO_INTERFERON_GAMMA	2/171	139/17872	0.384751884673523	0.537640133583264	0.456693026544611	AIF1/ACTG1	2
GOBP_MUSCLE_CELL_PROLIFERATION	GOBP_MUSCLE_CELL_PROLIFERATION	GOBP_MUSCLE_CELL_PROLIFERATION	3/171	233/17872	0.385825179334819	0.538785457532647	0.457665910502011	CYBA/AIF1/APOE	3
GOBP_B_CELL_ACTIVATION	GOBP_B_CELL_ACTIVATION	GOBP_B_CELL_ACTIVATION	4/171	329/17872	0.386302307783604	0.539097307314307	0.457930808175598	TYROBP/LGALS1/MNDA/MALT1	4
GOBP_POSITIVE_REGULATION_OF_NEURAL_PRECURSOR_CELL_PROLIFERATION	GOBP_POSITIVE_REGULATION_OF_NEURAL_PRECURSOR_CELL_PROLIFERATION	GOBP_POSITIVE_REGULATION_OF_NEURAL_PRECURSOR_CELL_PROLIFERATION	1/171	51/17872	0.387992019863097	0.540036074829108	0.458728234838483	HIF1A	1
GOBP_REGULATION_OF_GLUCONEOGENESIS	GOBP_REGULATION_OF_GLUCONEOGENESIS	GOBP_REGULATION_OF_GLUCONEOGENESIS	1/171	51/17872	0.387992019863097	0.540036074829108	0.458728234838483	RANBP2	1
GOBP_REGULATION_OF_VACUOLE_ORGANIZATION	GOBP_REGULATION_OF_VACUOLE_ORGANIZATION	GOBP_REGULATION_OF_VACUOLE_ORGANIZATION	1/171	51/17872	0.387992019863097	0.540036074829108	0.458728234838483	GRN	1
GOBP_RESPONSE_TO_COLD	GOBP_RESPONSE_TO_COLD	GOBP_RESPONSE_TO_COLD	1/171	51/17872	0.387992019863097	0.540036074829108	0.458728234838483	HSP90AA1	1
GOBP_ACTIVATION_OF_PROTEIN_KINASE_ACTIVITY	GOBP_ACTIVATION_OF_PROTEIN_KINASE_ACTIVITY	GOBP_ACTIVATION_OF_PROTEIN_KINASE_ACTIVITY	2/171	141/17872	0.391527502574822	0.543532297692106	0.461698066331782	RPLP1/MALT1	2
GOBP_NUCLEUS_ORGANIZATION	GOBP_NUCLEUS_ORGANIZATION	GOBP_NUCLEUS_ORGANIZATION	2/171	141/17872	0.391527502574822	0.543532297692106	0.461698066331782	USP36/RPS19	2
GOBP_REGULATION_OF_GENE_EXPRESSION_EPIGENETIC	GOBP_REGULATION_OF_GENE_EXPRESSION_EPIGENETIC	GOBP_REGULATION_OF_GENE_EXPRESSION_EPIGENETIC	2/171	141/17872	0.391527502574822	0.543532297692106	0.461698066331782	GPX1/EIF1	2
GOBP_REGULATION_OF_JNK_CASCADE	GOBP_REGULATION_OF_JNK_CASCADE	GOBP_REGULATION_OF_JNK_CASCADE	2/171	141/17872	0.391527502574822	0.543532297692106	0.461698066331782	PYCARD/GSTP1	2
GOBP_ESTABLISHMENT_OR_MAINTENANCE_OF_BIPOLAR_CELL_POLARITY	GOBP_ESTABLISHMENT_OR_MAINTENANCE_OF_BIPOLAR_CELL_POLARITY	GOBP_ESTABLISHMENT_OR_MAINTENANCE_OF_BIPOLAR_CELL_POLARITY	1/171	52/17872	0.393864494168883	0.54393250039968	0.462038014513357	EZR	1
GOBP_FC_RECEPTOR_SIGNALING_PATHWAY	GOBP_FC_RECEPTOR_SIGNALING_PATHWAY	GOBP_FC_RECEPTOR_SIGNALING_PATHWAY	1/171	52/17872	0.393864494168883	0.54393250039968	0.462038014513357	FCER1G	1
GOBP_INTRACELLULAR_PROTEIN_TRANSMEMBRANE_TRANSPORT	GOBP_INTRACELLULAR_PROTEIN_TRANSMEMBRANE_TRANSPORT	GOBP_INTRACELLULAR_PROTEIN_TRANSMEMBRANE_TRANSPORT	1/171	52/17872	0.393864494168883	0.54393250039968	0.462038014513357	SEC62	1
GOBP_NEGATIVE_REGULATION_OF_DNA_BINDING	GOBP_NEGATIVE_REGULATION_OF_DNA_BINDING	GOBP_NEGATIVE_REGULATION_OF_DNA_BINDING	1/171	52/17872	0.393864494168883	0.54393250039968	0.462038014513357	TMSB4X	1
GOBP_POSITIVE_REGULATION_OF_ORGAN_GROWTH	GOBP_POSITIVE_REGULATION_OF_ORGAN_GROWTH	GOBP_POSITIVE_REGULATION_OF_ORGAN_GROWTH	1/171	52/17872	0.393864494168883	0.54393250039968	0.462038014513357	SERP1	1
GOBP_REGULATION_OF_TRANSCRIPTION_REGULATORY_REGION_DNA_BINDING	GOBP_REGULATION_OF_TRANSCRIPTION_REGULATORY_REGION_DNA_BINDING	GOBP_REGULATION_OF_TRANSCRIPTION_REGULATORY_REGION_DNA_BINDING	1/171	52/17872	0.393864494168883	0.54393250039968	0.462038014513357	TMSB4X	1
GOBP_RETROGRADE_VESICLE_MEDIATED_TRANSPORT_GOLGI_TO_ENDOPLASMIC_RETICULUM	GOBP_RETROGRADE_VESICLE_MEDIATED_TRANSPORT_GOLGI_TO_ENDOPLASMIC_RETICULUM	GOBP_RETROGRADE_VESICLE_MEDIATED_TRANSPORT_GOLGI_TO_ENDOPLASMIC_RETICULUM	1/171	52/17872	0.393864494168883	0.54393250039968	0.462038014513357	COPE	1
GOBP_UNSATURATED_FATTY_ACID_BIOSYNTHETIC_PROCESS	GOBP_UNSATURATED_FATTY_ACID_BIOSYNTHETIC_PROCESS	GOBP_UNSATURATED_FATTY_ACID_BIOSYNTHETIC_PROCESS	1/171	52/17872	0.393864494168883	0.54393250039968	0.462038014513357	FABP5	1
GOBP_B_CELL_DIFFERENTIATION	GOBP_B_CELL_DIFFERENTIATION	GOBP_B_CELL_DIFFERENTIATION	2/171	142/17872	0.394902920274473	0.544304868697587	0.462354319034425	LGALS1/MALT1	2
GOBP_NEGATIVE_REGULATION_OF_CANONICAL_WNT_SIGNALING_PATHWAY	GOBP_NEGATIVE_REGULATION_OF_CANONICAL_WNT_SIGNALING_PATHWAY	GOBP_NEGATIVE_REGULATION_OF_CANONICAL_WNT_SIGNALING_PATHWAY	2/171	142/17872	0.394902920274473	0.544304868697587	0.462354319034425	PFDN5/APOE	2
GOBP_REGULATION_OF_TUBE_SIZE	GOBP_REGULATION_OF_TUBE_SIZE	GOBP_REGULATION_OF_TUBE_SIZE	2/171	142/17872	0.394902920274473	0.544304868697587	0.462354319034425	GPX1/APOE	2
GOBP_GLAND_DEVELOPMENT	GOBP_GLAND_DEVELOPMENT	GOBP_GLAND_DEVELOPMENT	5/171	432/17872	0.397617788615428	0.547338703602903	0.464931379708284	GPX1/RPS15/HIF1A/TSPO/EZR	5
GOBP_ORGANELLE_FUSION	GOBP_ORGANELLE_FUSION	GOBP_ORGANELLE_FUSION	2/171	143/17872	0.398269874889901	0.547338703602903	0.464931379708284	VAMP8/STX3	2
GOBP_RESPONSE_TO_IONIZING_RADIATION	GOBP_RESPONSE_TO_IONIZING_RADIATION	GOBP_RESPONSE_TO_IONIZING_RADIATION	2/171	143/17872	0.398269874889901	0.547338703602903	0.464931379708284	CYBA/GPX1	2
GOBP_CELLULAR_PIGMENTATION	GOBP_CELLULAR_PIGMENTATION	GOBP_CELLULAR_PIGMENTATION	1/171	53/17872	0.399680945992515	0.547338703602903	0.464931379708284	CD63	1
GOBP_ESTABLISHMENT_OF_ENDOTHELIAL_BARRIER	GOBP_ESTABLISHMENT_OF_ENDOTHELIAL_BARRIER	GOBP_ESTABLISHMENT_OF_ENDOTHELIAL_BARRIER	1/171	53/17872	0.399680945992515	0.547338703602903	0.464931379708284	EZR	1
GOBP_PHOSPHOLIPID_CATABOLIC_PROCESS	GOBP_PHOSPHOLIPID_CATABOLIC_PROCESS	GOBP_PHOSPHOLIPID_CATABOLIC_PROCESS	1/171	53/17872	0.399680945992515	0.547338703602903	0.464931379708284	APOC1	1
GOBP_POSITIVE_REGULATION_OF_G1_S_TRANSITION_OF_MITOTIC_CELL_CYCLE	GOBP_POSITIVE_REGULATION_OF_G1_S_TRANSITION_OF_MITOTIC_CELL_CYCLE	GOBP_POSITIVE_REGULATION_OF_G1_S_TRANSITION_OF_MITOTIC_CELL_CYCLE	1/171	53/17872	0.399680945992515	0.547338703602903	0.464931379708284	AIF1	1
GOBP_REGULATION_OF_ALCOHOL_BIOSYNTHETIC_PROCESS	GOBP_REGULATION_OF_ALCOHOL_BIOSYNTHETIC_PROCESS	GOBP_REGULATION_OF_ALCOHOL_BIOSYNTHETIC_PROCESS	1/171	53/17872	0.399680945992515	0.547338703602903	0.464931379708284	APOE	1
GOBP_REGULATION_OF_DNA_TEMPLATED_TRANSCRIPTION_IN_RESPONSE_TO_STRESS	GOBP_REGULATION_OF_DNA_TEMPLATED_TRANSCRIPTION_IN_RESPONSE_TO_STRESS	GOBP_REGULATION_OF_DNA_TEMPLATED_TRANSCRIPTION_IN_RESPONSE_TO_STRESS	1/171	53/17872	0.399680945992515	0.547338703602903	0.464931379708284	HIF1A	1
GOBP_REGULATION_OF_LAMELLIPODIUM_ORGANIZATION	GOBP_REGULATION_OF_LAMELLIPODIUM_ORGANIZATION	GOBP_REGULATION_OF_LAMELLIPODIUM_ORGANIZATION	1/171	53/17872	0.399680945992515	0.547338703602903	0.464931379708284	ARPC2	1
GOBP_REGULATION_OF_PEPTIDYL_SERINE_PHOSPHORYLATION	GOBP_REGULATION_OF_PEPTIDYL_SERINE_PHOSPHORYLATION	GOBP_REGULATION_OF_PEPTIDYL_SERINE_PHOSPHORYLATION	2/171	144/17872	0.401628219257532	0.549650990788014	0.466895528898134	RACK1/HSP90AA1	2
GOBP_REGULATION_OF_WNT_SIGNALING_PATHWAY	GOBP_REGULATION_OF_WNT_SIGNALING_PATHWAY	GOBP_REGULATION_OF_WNT_SIGNALING_PATHWAY	4/171	337/17872	0.403605840386149	0.552001806168823	0.468892405477927	RACK1/PFDN5/APOE/SULF2	4
GOBP_LEARNING	GOBP_LEARNING	GOBP_LEARNING	2/171	145/17872	0.404977809767498	0.553088381347413	0.469815385880398	HIF1A/PPT1	2
GOBP_POSITIVE_REGULATION_OF_SMALL_MOLECULE_METABOLIC_PROCESS	GOBP_POSITIVE_REGULATION_OF_SMALL_MOLECULE_METABOLIC_PROCESS	GOBP_POSITIVE_REGULATION_OF_SMALL_MOLECULE_METABOLIC_PROCESS	2/171	145/17872	0.404977809767498	0.553088381347413	0.469815385880398	TMSB4X/HIF1A	2
GOBP_CELLULAR_RESPONSE_TO_CAMP	GOBP_CELLULAR_RESPONSE_TO_CAMP	GOBP_CELLULAR_RESPONSE_TO_CAMP	1/171	54/17872	0.405441906665689	0.553088381347413	0.469815385880398	EZR	1
GOBP_PROTEIN_SUMOYLATION	GOBP_PROTEIN_SUMOYLATION	GOBP_PROTEIN_SUMOYLATION	1/171	54/17872	0.405441906665689	0.553088381347413	0.469815385880398	RANBP2	1
GOBP_RESPONSE_TO_RADIATION	GOBP_RESPONSE_TO_RADIATION	GOBP_RESPONSE_TO_RADIATION	5/171	438/17872	0.408994337363258	0.555845496375084	0.472157389625777	CYBA/GPX1/HIF1A/MAP4K3/CARD16	5
GOBP_PROTEIN_PROCESSING	GOBP_PROTEIN_PROCESSING	GOBP_PROTEIN_PROCESSING	3/171	242/17872	0.409011596566675	0.555845496375084	0.472157389625777	PYCARD/TMEM59/CARD16	3
GOBP_ENDODERM_FORMATION	GOBP_ENDODERM_FORMATION	GOBP_ENDODERM_FORMATION	1/171	55/17872	0.411147902510349	0.555845496375084	0.472157389625777	ITGB2	1
GOBP_INOSITOL_PHOSPHATE_METABOLIC_PROCESS	GOBP_INOSITOL_PHOSPHATE_METABOLIC_PROCESS	GOBP_INOSITOL_PHOSPHATE_METABOLIC_PROCESS	1/171	55/17872	0.411147902510349	0.555845496375084	0.472157389625777	INPP5A	1
GOBP_MACROPHAGE_MIGRATION	GOBP_MACROPHAGE_MIGRATION	GOBP_MACROPHAGE_MIGRATION	1/171	55/17872	0.411147902510349	0.555845496375084	0.472157389625777	CD9	1
GOBP_NEGATIVE_REGULATION_OF_G_PROTEIN_COUPLED_RECEPTOR_SIGNALING_PATHWAY	GOBP_NEGATIVE_REGULATION_OF_G_PROTEIN_COUPLED_RECEPTOR_SIGNALING_PATHWAY	GOBP_NEGATIVE_REGULATION_OF_G_PROTEIN_COUPLED_RECEPTOR_SIGNALING_PATHWAY	1/171	55/17872	0.411147902510349	0.555845496375084	0.472157389625777	YWHAB	1
GOBP_POSITIVE_REGULATION_OF_CELL_MATRIX_ADHESION	GOBP_POSITIVE_REGULATION_OF_CELL_MATRIX_ADHESION	GOBP_POSITIVE_REGULATION_OF_CELL_MATRIX_ADHESION	1/171	55/17872	0.411147902510349	0.555845496375084	0.472157389625777	CD36	1
GOBP_POSITIVE_REGULATION_OF_MYELOID_LEUKOCYTE_DIFFERENTIATION	GOBP_POSITIVE_REGULATION_OF_MYELOID_LEUKOCYTE_DIFFERENTIATION	GOBP_POSITIVE_REGULATION_OF_MYELOID_LEUKOCYTE_DIFFERENTIATION	1/171	55/17872	0.411147902510349	0.555845496375084	0.472157389625777	TYROBP	1
GOBP_REGULATION_OF_AMYLOID_PRECURSOR_PROTEIN_CATABOLIC_PROCESS	GOBP_REGULATION_OF_AMYLOID_PRECURSOR_PROTEIN_CATABOLIC_PROCESS	GOBP_REGULATION_OF_AMYLOID_PRECURSOR_PROTEIN_CATABOLIC_PROCESS	1/171	55/17872	0.411147902510349	0.555845496375084	0.472157389625777	APOE	1
GOBP_REGULATION_OF_CARBOHYDRATE_CATABOLIC_PROCESS	GOBP_REGULATION_OF_CARBOHYDRATE_CATABOLIC_PROCESS	GOBP_REGULATION_OF_CARBOHYDRATE_CATABOLIC_PROCESS	1/171	55/17872	0.411147902510349	0.555845496375084	0.472157389625777	HIF1A	1
GOBP_REGULATION_OF_DENDRITIC_SPINE_DEVELOPMENT	GOBP_REGULATION_OF_DENDRITIC_SPINE_DEVELOPMENT	GOBP_REGULATION_OF_DENDRITIC_SPINE_DEVELOPMENT	1/171	55/17872	0.411147902510349	0.555845496375084	0.472157389625777	APOE	1
GOBP_REGULATION_OF_LIPID_STORAGE	GOBP_REGULATION_OF_LIPID_STORAGE	GOBP_REGULATION_OF_LIPID_STORAGE	1/171	55/17872	0.411147902510349	0.555845496375084	0.472157389625777	CD36	1
GOBP_REGULATION_OF_MICROTUBULE_POLYMERIZATION	GOBP_REGULATION_OF_MICROTUBULE_POLYMERIZATION	GOBP_REGULATION_OF_MICROTUBULE_POLYMERIZATION	1/171	55/17872	0.411147902510349	0.555845496375084	0.472157389625777	RPS3	1
GOBP_SPINDLE_LOCALIZATION	GOBP_SPINDLE_LOCALIZATION	GOBP_SPINDLE_LOCALIZATION	1/171	55/17872	0.411147902510349	0.555845496375084	0.472157389625777	CFL1	1
GOBP_ORGANIC_ACID_CATABOLIC_PROCESS	GOBP_ORGANIC_ACID_CATABOLIC_PROCESS	GOBP_ORGANIC_ACID_CATABOLIC_PROCESS	3/171	243/17872	0.411572685631293	0.555845496375084	0.472157389625777	DDAH2/NPL/SLC27A4	3
GOBP_REGULATION_OF_INSULIN_SECRETION	GOBP_REGULATION_OF_INSULIN_SECRETION	GOBP_REGULATION_OF_INSULIN_SECRETION	2/171	147/17872	0.411650172221284	0.555845496375084	0.472157389625777	HIF1A/SERP1	2
GOBP_PLACENTA_DEVELOPMENT	GOBP_PLACENTA_DEVELOPMENT	GOBP_PLACENTA_DEVELOPMENT	2/171	148/17872	0.414972674233002	0.559975832319502	0.475665862124902	HIF1A/RPS6	2
GOBP_NEGATIVE_REGULATION_OF_GROWTH	GOBP_NEGATIVE_REGULATION_OF_GROWTH	GOBP_NEGATIVE_REGULATION_OF_GROWTH	3/171	245/17872	0.41668471417701	0.560659938047575	0.476246968883707	HIF1A/RACK1/PPT1	3
GOBP_AMYLOID_BETA_FORMATION	GOBP_AMYLOID_BETA_FORMATION	GOBP_AMYLOID_BETA_FORMATION	1/171	56/17872	0.41679945488565	0.560659938047575	0.476246968883707	APOE	1
GOBP_INOSITOL_PHOSPHATE_MEDIATED_SIGNALING	GOBP_INOSITOL_PHOSPHATE_MEDIATED_SIGNALING	GOBP_INOSITOL_PHOSPHATE_MEDIATED_SIGNALING	1/171	56/17872	0.41679945488565	0.560659938047575	0.476246968883707	INPP5A	1
GOBP_LEUKOCYTE_ADHESION_TO_VASCULAR_ENDOTHELIAL_CELL	GOBP_LEUKOCYTE_ADHESION_TO_VASCULAR_ENDOTHELIAL_CELL	GOBP_LEUKOCYTE_ADHESION_TO_VASCULAR_ENDOTHELIAL_CELL	1/171	56/17872	0.41679945488565	0.560659938047575	0.476246968883707	ITGB2	1
GOBP_REGULATION_OF_POSTSYNAPTIC_MEMBRANE_NEUROTRANSMITTER_RECEPTOR_LEVELS	GOBP_REGULATION_OF_POSTSYNAPTIC_MEMBRANE_NEUROTRANSMITTER_RECEPTOR_LEVELS	GOBP_REGULATION_OF_POSTSYNAPTIC_MEMBRANE_NEUROTRANSMITTER_RECEPTOR_LEVELS	1/171	56/17872	0.41679945488565	0.560659938047575	0.476246968883707	STX3	1
GOBP_RETINA_DEVELOPMENT_IN_CAMERA_TYPE_EYE	GOBP_RETINA_DEVELOPMENT_IN_CAMERA_TYPE_EYE	GOBP_RETINA_DEVELOPMENT_IN_CAMERA_TYPE_EYE	2/171	149/17872	0.418285882418653	0.56194763710134	0.477340791947516	HIF1A/PFDN5	2
GOBP_SULFUR_COMPOUND_BIOSYNTHETIC_PROCESS	GOBP_SULFUR_COMPOUND_BIOSYNTHETIC_PROCESS	GOBP_SULFUR_COMPOUND_BIOSYNTHETIC_PROCESS	2/171	149/17872	0.418285882418653	0.56194763710134	0.477340791947516	PPT1/GSTP1	2
GOBP_MORPHOGENESIS_OF_EMBRYONIC_EPITHELIUM	GOBP_MORPHOGENESIS_OF_EMBRYONIC_EPITHELIUM	GOBP_MORPHOGENESIS_OF_EMBRYONIC_EPITHELIUM	2/171	150/17872	0.421589670143394	0.563549873378148	0.478701795505078	HIF1A/PFN1	2
GOBP_SECONDARY_ALCOHOL_METABOLIC_PROCESS	GOBP_SECONDARY_ALCOHOL_METABOLIC_PROCESS	GOBP_SECONDARY_ALCOHOL_METABOLIC_PROCESS	2/171	150/17872	0.421589670143394	0.563549873378148	0.478701795505078	NPC2/APOE	2
GOBP_CYTOPLASMIC_MICROTUBULE_ORGANIZATION	GOBP_CYTOPLASMIC_MICROTUBULE_ORGANIZATION	GOBP_CYTOPLASMIC_MICROTUBULE_ORGANIZATION	1/171	57/17872	0.422397080234469	0.563549873378148	0.478701795505078	EZR	1
GOBP_NEGATIVE_REGULATION_OF_PROTEIN_KINASE_B_SIGNALING	GOBP_NEGATIVE_REGULATION_OF_PROTEIN_KINASE_B_SIGNALING	GOBP_NEGATIVE_REGULATION_OF_PROTEIN_KINASE_B_SIGNALING	1/171	57/17872	0.422397080234469	0.563549873378148	0.478701795505078	RACK1	1
GOBP_POSITIVE_REGULATION_OF_DNA_BINDING	GOBP_POSITIVE_REGULATION_OF_DNA_BINDING	GOBP_POSITIVE_REGULATION_OF_DNA_BINDING	1/171	57/17872	0.422397080234469	0.563549873378148	0.478701795505078	EDF1	1
GOBP_PROTEIN_HOMOTETRAMERIZATION	GOBP_PROTEIN_HOMOTETRAMERIZATION	GOBP_PROTEIN_HOMOTETRAMERIZATION	1/171	57/17872	0.422397080234469	0.563549873378148	0.478701795505078	ALDOA	1
GOBP_REGULATION_OF_ACTION_POTENTIAL	GOBP_REGULATION_OF_ACTION_POTENTIAL	GOBP_REGULATION_OF_ACTION_POTENTIAL	1/171	57/17872	0.422397080234469	0.563549873378148	0.478701795505078	CD36	1
GOBP_REGULATION_OF_CELL_AGING	GOBP_REGULATION_OF_CELL_AGING	GOBP_REGULATION_OF_CELL_AGING	1/171	57/17872	0.422397080234469	0.563549873378148	0.478701795505078	YBX1	1
GOBP_REGULATION_OF_DNA_TEMPLATED_TRANSCRIPTION_ELONGATION	GOBP_REGULATION_OF_DNA_TEMPLATED_TRANSCRIPTION_ELONGATION	GOBP_REGULATION_OF_DNA_TEMPLATED_TRANSCRIPTION_ELONGATION	1/171	57/17872	0.422397080234469	0.563549873378148	0.478701795505078	SUPT4H1	1
GOBP_REGULATION_OF_DNA_TEMPLATED_TRANSCRIPTION_INITIATION	GOBP_REGULATION_OF_DNA_TEMPLATED_TRANSCRIPTION_INITIATION	GOBP_REGULATION_OF_DNA_TEMPLATED_TRANSCRIPTION_INITIATION	1/171	57/17872	0.422397080234469	0.563549873378148	0.478701795505078	SUB1	1
GOBP_REGULATION_OF_LYMPHOCYTE_APOPTOTIC_PROCESS	GOBP_REGULATION_OF_LYMPHOCYTE_APOPTOTIC_PROCESS	GOBP_REGULATION_OF_LYMPHOCYTE_APOPTOTIC_PROCESS	1/171	57/17872	0.422397080234469	0.563549873378148	0.478701795505078	HIF1A	1
GOBP_ARACHIDONIC_ACID_METABOLIC_PROCESS	GOBP_ARACHIDONIC_ACID_METABOLIC_PROCESS	GOBP_ARACHIDONIC_ACID_METABOLIC_PROCESS	1/171	58/17872	0.427941290129496	0.566270162445178	0.481012517807035	GPX1	1
GOBP_CATECHOL_CONTAINING_COMPOUND_METABOLIC_PROCESS	GOBP_CATECHOL_CONTAINING_COMPOUND_METABOLIC_PROCESS	GOBP_CATECHOL_CONTAINING_COMPOUND_METABOLIC_PROCESS	1/171	58/17872	0.427941290129496	0.566270162445178	0.481012517807035	ITGB2	1
GOBP_DENDRITIC_SPINE_MORPHOGENESIS	GOBP_DENDRITIC_SPINE_MORPHOGENESIS	GOBP_DENDRITIC_SPINE_MORPHOGENESIS	1/171	58/17872	0.427941290129496	0.566270162445178	0.481012517807035	CFL1	1
GOBP_MEMBRANE_PROTEIN_PROTEOLYSIS	GOBP_MEMBRANE_PROTEIN_PROTEOLYSIS	GOBP_MEMBRANE_PROTEIN_PROTEOLYSIS	1/171	58/17872	0.427941290129496	0.566270162445178	0.481012517807035	APOE	1
GOBP_NADH_DEHYDROGENASE_COMPLEX_ASSEMBLY	GOBP_NADH_DEHYDROGENASE_COMPLEX_ASSEMBLY	GOBP_NADH_DEHYDROGENASE_COMPLEX_ASSEMBLY	1/171	58/17872	0.427941290129496	0.566270162445178	0.481012517807035	NDUFB10	1
GOBP_NEGATIVE_REGULATION_OF_ENDOCYTOSIS	GOBP_NEGATIVE_REGULATION_OF_ENDOCYTOSIS	GOBP_NEGATIVE_REGULATION_OF_ENDOCYTOSIS	1/171	58/17872	0.427941290129496	0.566270162445178	0.481012517807035	APOC1	1
GOBP_NEGATIVE_REGULATION_OF_PEPTIDYL_TYROSINE_PHOSPHORYLATION	GOBP_NEGATIVE_REGULATION_OF_PEPTIDYL_TYROSINE_PHOSPHORYLATION	GOBP_NEGATIVE_REGULATION_OF_PEPTIDYL_TYROSINE_PHOSPHORYLATION	1/171	58/17872	0.427941290129496	0.566270162445178	0.481012517807035	RACK1	1
GOBP_P38MAPK_CASCADE	GOBP_P38MAPK_CASCADE	GOBP_P38MAPK_CASCADE	1/171	58/17872	0.427941290129496	0.566270162445178	0.481012517807035	EZR	1
GOBP_PEPTIDYL_PROLINE_MODIFICATION	GOBP_PEPTIDYL_PROLINE_MODIFICATION	GOBP_PEPTIDYL_PROLINE_MODIFICATION	1/171	58/17872	0.427941290129496	0.566270162445178	0.481012517807035	RANBP2	1
GOBP_REGULATION_OF_SUBSTRATE_ADHESION_DEPENDENT_CELL_SPREADING	GOBP_REGULATION_OF_SUBSTRATE_ADHESION_DEPENDENT_CELL_SPREADING	GOBP_REGULATION_OF_SUBSTRATE_ADHESION_DEPENDENT_CELL_SPREADING	1/171	58/17872	0.427941290129496	0.566270162445178	0.481012517807035	ARPC2	1
GOBP_RESPONSE_TO_AMYLOID_BETA	GOBP_RESPONSE_TO_AMYLOID_BETA	GOBP_RESPONSE_TO_AMYLOID_BETA	1/171	58/17872	0.427941290129496	0.566270162445178	0.481012517807035	CD36	1
GOBP_VASCULAR_ENDOTHELIAL_GROWTH_FACTOR_RECEPTOR_SIGNALING_PATHWAY	GOBP_VASCULAR_ENDOTHELIAL_GROWTH_FACTOR_RECEPTOR_SIGNALING_PATHWAY	GOBP_VASCULAR_ENDOTHELIAL_GROWTH_FACTOR_RECEPTOR_SIGNALING_PATHWAY	1/171	58/17872	0.427941290129496	0.566270162445178	0.481012517807035	HIF1A	1
GOBP_REGULATION_OF_DNA_REPAIR	GOBP_REGULATION_OF_DNA_REPAIR	GOBP_REGULATION_OF_DNA_REPAIR	2/171	152/17872	0.42816849382625	0.566270162445178	0.481012517807035	ACTB/RPS3	2
GOBP_TUBE_FORMATION	GOBP_TUBE_FORMATION	GOBP_TUBE_FORMATION	2/171	152/17872	0.42816849382625	0.566270162445178	0.481012517807035	HIF1A/PFN1	2
GOBP_MUSCLE_SYSTEM_PROCESS	GOBP_MUSCLE_SYSTEM_PROCESS	GOBP_MUSCLE_SYSTEM_PROCESS	5/171	449/17872	0.429775601996743	0.568041928214737	0.482517526494231	CYBA/MYL6/AIF1/SULF2/ALDOA	5
GOBP_POSITIVE_REGULATION_OF_LIPID_METABOLIC_PROCESS	GOBP_POSITIVE_REGULATION_OF_LIPID_METABOLIC_PROCESS	GOBP_POSITIVE_REGULATION_OF_LIPID_METABOLIC_PROCESS	2/171	153/17872	0.431443292521483	0.569891513255988	0.484088637982339	APOE/APOC1	2
GOBP_IRON_ION_TRANSPORT	GOBP_IRON_ION_TRANSPORT	GOBP_IRON_ION_TRANSPORT	1/171	59/17872	0.433432591318889	0.571240347743095	0.485234391927676	FTL	1
GOBP_POSITIVE_REGULATION_OF_T_CELL_MEDIATED_IMMUNITY	GOBP_POSITIVE_REGULATION_OF_T_CELL_MEDIATED_IMMUNITY	GOBP_POSITIVE_REGULATION_OF_T_CELL_MEDIATED_IMMUNITY	1/171	59/17872	0.433432591318889	0.571240347743095	0.485234391927676	MALT1	1
GOBP_REGULATION_OF_RECEPTOR_INTERNALIZATION	GOBP_REGULATION_OF_RECEPTOR_INTERNALIZATION	GOBP_REGULATION_OF_RECEPTOR_INTERNALIZATION	1/171	59/17872	0.433432591318889	0.571240347743095	0.485234391927676	CD63	1
GOBP_EPITHELIAL_CELL_PROLIFERATION	GOBP_EPITHELIAL_CELL_PROLIFERATION	GOBP_EPITHELIAL_CELL_PROLIFERATION	5/171	451/17872	0.433540226253234	0.571240347743095	0.485234391927676	CYBA/GPX1/HIF1A/GRN/APOE	5
GOBP_NEURAL_TUBE_DEVELOPMENT	GOBP_NEURAL_TUBE_DEVELOPMENT	GOBP_NEURAL_TUBE_DEVELOPMENT	2/171	154/17872	0.434708196132423	0.572424183871832	0.486239989670096	HIF1A/PFN1	2
GOBP_STEROL_METABOLIC_PROCESS	GOBP_STEROL_METABOLIC_PROCESS	GOBP_STEROL_METABOLIC_PROCESS	2/171	155/17872	0.43796309373817	0.575764691648351	0.489077550542806	NPC2/APOE	2
GOBP_NEGATIVE_REGULATION_OF_INTRACELLULAR_TRANSPORT	GOBP_NEGATIVE_REGULATION_OF_INTRACELLULAR_TRANSPORT	GOBP_NEGATIVE_REGULATION_OF_INTRACELLULAR_TRANSPORT	1/171	60/17872	0.438871485771506	0.575764691648351	0.489077550542806	CD36	1
GOBP_NEURAL_CREST_CELL_MIGRATION	GOBP_NEURAL_CREST_CELL_MIGRATION	GOBP_NEURAL_CREST_CELL_MIGRATION	1/171	60/17872	0.438871485771506	0.575764691648351	0.489077550542806	HIF1A	1
GOBP_NUCLEOSIDE_BISPHOSPHATE_BIOSYNTHETIC_PROCESS	GOBP_NUCLEOSIDE_BISPHOSPHATE_BIOSYNTHETIC_PROCESS	GOBP_NUCLEOSIDE_BISPHOSPHATE_BIOSYNTHETIC_PROCESS	1/171	60/17872	0.438871485771506	0.575764691648351	0.489077550542806	PPT1	1
GOBP_PROTEIN_INSERTION_INTO_MEMBRANE	GOBP_PROTEIN_INSERTION_INTO_MEMBRANE	GOBP_PROTEIN_INSERTION_INTO_MEMBRANE	1/171	60/17872	0.438871485771506	0.575764691648351	0.489077550542806	HSP90AA1	1
GOBP_REGULATION_OF_MIRNA_TRANSCRIPTION	GOBP_REGULATION_OF_MIRNA_TRANSCRIPTION	GOBP_REGULATION_OF_MIRNA_TRANSCRIPTION	1/171	60/17872	0.438871485771506	0.575764691648351	0.489077550542806	HIF1A	1
GOBP_NUCLEAR_EXPORT	GOBP_NUCLEAR_EXPORT	GOBP_NUCLEAR_EXPORT	2/171	156/17872	0.441207877416397	0.577759267344283	0.490771822890326	RPS15/MALT1	2
GOBP_SINGLE_FERTILIZATION	GOBP_SINGLE_FERTILIZATION	GOBP_SINGLE_FERTILIZATION	2/171	156/17872	0.441207877416397	0.577759267344283	0.490771822890326	ALDOA/CD9	2
GOBP_TRANSPORT_ALONG_MICROTUBULE	GOBP_TRANSPORT_ALONG_MICROTUBULE	GOBP_TRANSPORT_ALONG_MICROTUBULE	2/171	156/17872	0.441207877416397	0.577759267344283	0.490771822890326	HIF1A/HSPA8	2
GOBP_CORTICAL_CYTOSKELETON_ORGANIZATION	GOBP_CORTICAL_CYTOSKELETON_ORGANIZATION	GOBP_CORTICAL_CYTOSKELETON_ORGANIZATION	1/171	61/17872	0.444258470721713	0.579849967583441	0.492547747268321	EZR	1
GOBP_NEUROBLAST_PROLIFERATION	GOBP_NEUROBLAST_PROLIFERATION	GOBP_NEUROBLAST_PROLIFERATION	1/171	61/17872	0.444258470721713	0.579849967583441	0.492547747268321	HIF1A	1
GOBP_POSITIVE_REGULATION_OF_ACTIN_FILAMENT_BUNDLE_ASSEMBLY	GOBP_POSITIVE_REGULATION_OF_ACTIN_FILAMENT_BUNDLE_ASSEMBLY	GOBP_POSITIVE_REGULATION_OF_ACTIN_FILAMENT_BUNDLE_ASSEMBLY	1/171	61/17872	0.444258470721713	0.579849967583441	0.492547747268321	PFN1	1
GOBP_POSITIVE_REGULATION_OF_VIRAL_PROCESS	GOBP_POSITIVE_REGULATION_OF_VIRAL_PROCESS	GOBP_POSITIVE_REGULATION_OF_VIRAL_PROCESS	1/171	61/17872	0.444258470721713	0.579849967583441	0.492547747268321	LGALS1	1
GOBP_REGULATION_OF_LIPID_CATABOLIC_PROCESS	GOBP_REGULATION_OF_LIPID_CATABOLIC_PROCESS	GOBP_REGULATION_OF_LIPID_CATABOLIC_PROCESS	1/171	61/17872	0.444258470721713	0.579849967583441	0.492547747268321	APOC1	1
GOBP_OLEFINIC_COMPOUND_METABOLIC_PROCESS	GOBP_OLEFINIC_COMPOUND_METABOLIC_PROCESS	GOBP_OLEFINIC_COMPOUND_METABOLIC_PROCESS	2/171	157/17872	0.444442442196724	0.579849967583441	0.492547747268321	GPX1/GSTP1	2
GOBP_LYMPHOCYTE_MEDIATED_IMMUNITY	GOBP_LYMPHOCYTE_MEDIATED_IMMUNITY	GOBP_LYMPHOCYTE_MEDIATED_IMMUNITY	4/171	357/17872	0.446423895757521	0.582077565739088	0.494439958210326	FCER1G/C1QB/C1QC/MALT1	4
GOBP_ORGANOPHOSPHATE_CATABOLIC_PROCESS	GOBP_ORGANOPHOSPHATE_CATABOLIC_PROCESS	GOBP_ORGANOPHOSPHATE_CATABOLIC_PROCESS	2/171	158/17872	0.447666686014724	0.583339902512438	0.495512237539062	APOC1/INPP5A	2
GOBP_GOLGI_TO_PLASMA_MEMBRANE_TRANSPORT	GOBP_GOLGI_TO_PLASMA_MEMBRANE_TRANSPORT	GOBP_GOLGI_TO_PLASMA_MEMBRANE_TRANSPORT	1/171	62/17872	0.449594038713773	0.584775099955942	0.496731351632712	RACK1	1
GOBP_HETEROTYPIC_CELL_CELL_ADHESION	GOBP_HETEROTYPIC_CELL_CELL_ADHESION	GOBP_HETEROTYPIC_CELL_CELL_ADHESION	1/171	62/17872	0.449594038713773	0.584775099955942	0.496731351632712	ITGB2	1
GOBP_REGULATION_OF_MACROPHAGE_ACTIVATION	GOBP_REGULATION_OF_MACROPHAGE_ACTIVATION	GOBP_REGULATION_OF_MACROPHAGE_ACTIVATION	1/171	62/17872	0.449594038713773	0.584775099955942	0.496731351632712	GRN	1
GOBP_ADAPTIVE_THERMOGENESIS	GOBP_ADAPTIVE_THERMOGENESIS	GOBP_ADAPTIVE_THERMOGENESIS	2/171	159/17872	0.450880509666503	0.585731010722723	0.497543340459286	CD36/FABP5	2
GOBP_REGULATION_OF_VIRAL_PROCESS	GOBP_REGULATION_OF_VIRAL_PROCESS	GOBP_REGULATION_OF_VIRAL_PROCESS	2/171	159/17872	0.450880509666503	0.585731010722723	0.497543340459286	LGALS1/FCN1	2
GOBP_EXOCYTOSIS	GOBP_EXOCYTOSIS	GOBP_EXOCYTOSIS	4/171	360/17872	0.452773090356465	0.587340130947572	0.498910191517563	VAMP8/ITGB2/STXBP2/STX3	4
GOBP_ESTABLISHMENT_OF_PROTEIN_LOCALIZATION_TO_PLASMA_MEMBRANE	GOBP_ESTABLISHMENT_OF_PROTEIN_LOCALIZATION_TO_PLASMA_MEMBRANE	GOBP_ESTABLISHMENT_OF_PROTEIN_LOCALIZATION_TO_PLASMA_MEMBRANE	1/171	63/17872	0.454878677645831	0.587340130947572	0.498910191517563	RACK1	1
GOBP_INTERLEUKIN_12_PRODUCTION	GOBP_INTERLEUKIN_12_PRODUCTION	GOBP_INTERLEUKIN_12_PRODUCTION	1/171	63/17872	0.454878677645831	0.587340130947572	0.498910191517563	CD36	1
GOBP_LYMPHOCYTE_CHEMOTAXIS	GOBP_LYMPHOCYTE_CHEMOTAXIS	GOBP_LYMPHOCYTE_CHEMOTAXIS	1/171	63/17872	0.454878677645831	0.587340130947572	0.498910191517563	OXSR1	1
GOBP_NEGATIVE_REGULATION_OF_LIPID_LOCALIZATION	GOBP_NEGATIVE_REGULATION_OF_LIPID_LOCALIZATION	GOBP_NEGATIVE_REGULATION_OF_LIPID_LOCALIZATION	1/171	63/17872	0.454878677645831	0.587340130947572	0.498910191517563	APOC1	1
GOBP_NEGATIVE_REGULATION_OF_REPRODUCTIVE_PROCESS	GOBP_NEGATIVE_REGULATION_OF_REPRODUCTIVE_PROCESS	GOBP_NEGATIVE_REGULATION_OF_REPRODUCTIVE_PROCESS	1/171	63/17872	0.454878677645831	0.587340130947572	0.498910191517563	ARHGDIB	1
GOBP_NUCLEAR_TRANSCRIBED_MRNA_CATABOLIC_PROCESS_DEADENYLATION_DEPENDENT_DECAY	GOBP_NUCLEAR_TRANSCRIBED_MRNA_CATABOLIC_PROCESS_DEADENYLATION_DEPENDENT_DECAY	GOBP_NUCLEAR_TRANSCRIBED_MRNA_CATABOLIC_PROCESS_DEADENYLATION_DEPENDENT_DECAY	1/171	63/17872	0.454878677645831	0.587340130947572	0.498910191517563	YBX1	1
GOBP_PROTEIN_TRANSMEMBRANE_TRANSPORT	GOBP_PROTEIN_TRANSMEMBRANE_TRANSPORT	GOBP_PROTEIN_TRANSMEMBRANE_TRANSPORT	1/171	63/17872	0.454878677645831	0.587340130947572	0.498910191517563	SEC62	1
GOBP_RESPONSE_TO_FATTY_ACID	GOBP_RESPONSE_TO_FATTY_ACID	GOBP_RESPONSE_TO_FATTY_ACID	1/171	63/17872	0.454878677645831	0.587340130947572	0.498910191517563	CD36	1
GOBP_ALCOHOL_METABOLIC_PROCESS	GOBP_ALCOHOL_METABOLIC_PROCESS	GOBP_ALCOHOL_METABOLIC_PROCESS	4/171	361/17872	0.45488442345045	0.587340130947572	0.498910191517563	NPC2/APOE/INPP5A/TPI1	4
GOBP_REGULATION_OF_PEPTIDYL_TYROSINE_PHOSPHORYLATION	GOBP_REGULATION_OF_PEPTIDYL_TYROSINE_PHOSPHORYLATION	GOBP_REGULATION_OF_PEPTIDYL_TYROSINE_PHOSPHORYLATION	3/171	261/17872	0.457021328432551	0.589353953324061	0.500620812765111	RACK1/ITGB2/CD36	3
GOBP_ESTABLISHMENT_OF_RNA_LOCALIZATION	GOBP_ESTABLISHMENT_OF_RNA_LOCALIZATION	GOBP_ESTABLISHMENT_OF_RNA_LOCALIZATION	2/171	161/17872	0.457276513690232	0.589353953324061	0.500620812765111	RANBP2/YBX1	2
GOBP_NEGATIVE_REGULATION_OF_LYMPHOCYTE_ACTIVATION	GOBP_NEGATIVE_REGULATION_OF_LYMPHOCYTE_ACTIVATION	GOBP_NEGATIVE_REGULATION_OF_LYMPHOCYTE_ACTIVATION	2/171	161/17872	0.457276513690232	0.589353953324061	0.500620812765111	TYROBP/MNDA	2
GOBP_ADAPTIVE_IMMUNE_RESPONSE_BASED_ON_SOMATIC_RECOMBINATION_OF_IMMUNE_RECEPTORS_BUILT_FROM_IMMUNOGLOBULIN_SUPERFAMILY_DOMAINS	GOBP_ADAPTIVE_IMMUNE_RESPONSE_BASED_ON_SOMATIC_RECOMBINATION_OF_IMMUNE_RECEPTORS_BUILT_FROM_IMMUNOGLOBULIN_SUPERFAMILY_DOMAINS	GOBP_ADAPTIVE_IMMUNE_RESPONSE_BASED_ON_SOMATIC_RECOMBINATION_OF_IMMUNE_RECEPTORS_BUILT_FROM_IMMUNOGLOBULIN_SUPERFAMILY_DOMAINS	4/171	363/17872	0.45909920848365	0.590501352028894	0.501595459102747	FCER1G/C1QB/C1QC/MALT1	4
GOBP_POSITIVE_REGULATION_OF_DOUBLE_STRAND_BREAK_REPAIR	GOBP_POSITIVE_REGULATION_OF_DOUBLE_STRAND_BREAK_REPAIR	GOBP_POSITIVE_REGULATION_OF_DOUBLE_STRAND_BREAK_REPAIR	1/171	64/17872	0.460112870813474	0.590501352028894	0.501595459102747	ACTB	1
GOBP_POSITIVE_REGULATION_OF_GLIOGENESIS	GOBP_POSITIVE_REGULATION_OF_GLIOGENESIS	GOBP_POSITIVE_REGULATION_OF_GLIOGENESIS	1/171	64/17872	0.460112870813474	0.590501352028894	0.501595459102747	TSPO	1
GOBP_POSITIVE_REGULATION_OF_RESPONSE_TO_CYTOKINE_STIMULUS	GOBP_POSITIVE_REGULATION_OF_RESPONSE_TO_CYTOKINE_STIMULUS	GOBP_POSITIVE_REGULATION_OF_RESPONSE_TO_CYTOKINE_STIMULUS	1/171	64/17872	0.460112870813474	0.590501352028894	0.501595459102747	HIF1A	1
GOBP_REGULATION_OF_MULTICELLULAR_ORGANISM_GROWTH	GOBP_REGULATION_OF_MULTICELLULAR_ORGANISM_GROWTH	GOBP_REGULATION_OF_MULTICELLULAR_ORGANISM_GROWTH	1/171	64/17872	0.460112870813474	0.590501352028894	0.501595459102747	EZR	1
GOBP_REGULATION_OF_OSTEOCLAST_DIFFERENTIATION	GOBP_REGULATION_OF_OSTEOCLAST_DIFFERENTIATION	GOBP_REGULATION_OF_OSTEOCLAST_DIFFERENTIATION	1/171	64/17872	0.460112870813474	0.590501352028894	0.501595459102747	TYROBP	1
GOBP_SNRNA_METABOLIC_PROCESS	GOBP_SNRNA_METABOLIC_PROCESS	GOBP_SNRNA_METABOLIC_PROCESS	1/171	64/17872	0.460112870813474	0.590501352028894	0.501595459102747	NOP10	1
GOBP_TELOMERE_ORGANIZATION	GOBP_TELOMERE_ORGANIZATION	GOBP_TELOMERE_ORGANIZATION	2/171	162/17872	0.460458509556703	0.590588088344467	0.501669136397273	NOP10/HSP90AA1	2
GOBP_T_CELL_DIFFERENTIATION	GOBP_T_CELL_DIFFERENTIATION	GOBP_T_CELL_DIFFERENTIATION	3/171	263/17872	0.46198457049308	0.592187826027339	0.503028017549241	RPS6/FCER1G/MALT1	3
GOBP_IMPORT_INTO_NUCLEUS	GOBP_IMPORT_INTO_NUCLEUS	GOBP_IMPORT_INTO_NUCLEUS	2/171	163/17872	0.463629716159279	0.593568188545321	0.504200552664625	RANBP2/CD36	2
GOBP_POSITIVE_REGULATION_OF_ION_TRANSMEMBRANE_TRANSPORT	GOBP_POSITIVE_REGULATION_OF_ION_TRANSMEMBRANE_TRANSPORT	GOBP_POSITIVE_REGULATION_OF_ION_TRANSMEMBRANE_TRANSPORT	2/171	163/17872	0.463629716159279	0.593568188545321	0.504200552664625	TMSB4X/NDUFA4	2
GOBP_ANIMAL_ORGAN_REGENERATION	GOBP_ANIMAL_ORGAN_REGENERATION	GOBP_ANIMAL_ORGAN_REGENERATION	1/171	65/17872	0.4652970969529	0.593568188545321	0.504200552664625	RPS15	1
GOBP_AXONAL_TRANSPORT	GOBP_AXONAL_TRANSPORT	GOBP_AXONAL_TRANSPORT	1/171	65/17872	0.4652970969529	0.593568188545321	0.504200552664625	HIF1A	1
GOBP_NEGATIVE_REGULATION_OF_PROTEOLYSIS_INVOLVED_IN_CELLULAR_PROTEIN_CATABOLIC_PROCESS	GOBP_NEGATIVE_REGULATION_OF_PROTEOLYSIS_INVOLVED_IN_CELLULAR_PROTEIN_CATABOLIC_PROCESS	GOBP_NEGATIVE_REGULATION_OF_PROTEOLYSIS_INVOLVED_IN_CELLULAR_PROTEIN_CATABOLIC_PROCESS	1/171	65/17872	0.4652970969529	0.593568188545321	0.504200552664625	RPL11	1
GOBP_POSITIVE_REGULATION_OF_CELL_KILLING	GOBP_POSITIVE_REGULATION_OF_CELL_KILLING	GOBP_POSITIVE_REGULATION_OF_CELL_KILLING	1/171	65/17872	0.4652970969529	0.593568188545321	0.504200552664625	TYROBP	1
GOBP_SENSORY_PERCEPTION_OF_TASTE	GOBP_SENSORY_PERCEPTION_OF_TASTE	GOBP_SENSORY_PERCEPTION_OF_TASTE	1/171	65/17872	0.4652970969529	0.593568188545321	0.504200552664625	CD36	1
GOBP_ZYMOGEN_ACTIVATION	GOBP_ZYMOGEN_ACTIVATION	GOBP_ZYMOGEN_ACTIVATION	1/171	65/17872	0.4652970969529	0.593568188545321	0.504200552664625	PYCARD	1
GOBP_EPITHELIAL_TO_MESENCHYMAL_TRANSITION	GOBP_EPITHELIAL_TO_MESENCHYMAL_TRANSITION	GOBP_EPITHELIAL_TO_MESENCHYMAL_TRANSITION	2/171	164/17872	0.466790047936207	0.595115283203184	0.505514716726265	S100A4/HIF1A	2
GOBP_AMYLOID_BETA_METABOLIC_PROCESS	GOBP_AMYLOID_BETA_METABOLIC_PROCESS	GOBP_AMYLOID_BETA_METABOLIC_PROCESS	1/171	66/17872	0.470431830283672	0.596891999714766	0.507023930771687	APOE	1
GOBP_CELLULAR_COMPONENT_MAINTENANCE	GOBP_CELLULAR_COMPONENT_MAINTENANCE	GOBP_CELLULAR_COMPONENT_MAINTENANCE	1/171	66/17872	0.470431830283672	0.596891999714766	0.507023930771687	APOE	1
GOBP_FILOPODIUM_ASSEMBLY	GOBP_FILOPODIUM_ASSEMBLY	GOBP_FILOPODIUM_ASSEMBLY	1/171	66/17872	0.470431830283672	0.596891999714766	0.507023930771687	EZR	1
GOBP_NEGATIVE_REGULATION_OF_MRNA_CATABOLIC_PROCESS	GOBP_NEGATIVE_REGULATION_OF_MRNA_CATABOLIC_PROCESS	GOBP_NEGATIVE_REGULATION_OF_MRNA_CATABOLIC_PROCESS	1/171	66/17872	0.470431830283672	0.596891999714766	0.507023930771687	YBX1	1
GOBP_POSITIVE_REGULATION_OF_CELL_CYCLE_G1_S_PHASE_TRANSITION	GOBP_POSITIVE_REGULATION_OF_CELL_CYCLE_G1_S_PHASE_TRANSITION	GOBP_POSITIVE_REGULATION_OF_CELL_CYCLE_G1_S_PHASE_TRANSITION	1/171	66/17872	0.470431830283672	0.596891999714766	0.507023930771687	AIF1	1
GOBP_REGULATION_OF_CD4_POSITIVE_ALPHA_BETA_T_CELL_ACTIVATION	GOBP_REGULATION_OF_CD4_POSITIVE_ALPHA_BETA_T_CELL_ACTIVATION	GOBP_REGULATION_OF_CD4_POSITIVE_ALPHA_BETA_T_CELL_ACTIVATION	1/171	66/17872	0.470431830283672	0.596891999714766	0.507023930771687	MALT1	1
GOBP_RNA_STABILIZATION	GOBP_RNA_STABILIZATION	GOBP_RNA_STABILIZATION	1/171	66/17872	0.470431830283672	0.596891999714766	0.507023930771687	YBX1	1
GOBP_STEROL_BIOSYNTHETIC_PROCESS	GOBP_STEROL_BIOSYNTHETIC_PROCESS	GOBP_STEROL_BIOSYNTHETIC_PROCESS	1/171	66/17872	0.470431830283672	0.596891999714766	0.507023930771687	APOE	1
GOBP_SKELETAL_MUSCLE_ORGAN_DEVELOPMENT	GOBP_SKELETAL_MUSCLE_ORGAN_DEVELOPMENT	GOBP_SKELETAL_MUSCLE_ORGAN_DEVELOPMENT	2/171	166/17872	0.473077757726379	0.59940608672433	0.50915949680122	MYL6/GPX1	2
GOBP_CELLULAR_RESPONSE_TO_HEAT	GOBP_CELLULAR_RESPONSE_TO_HEAT	GOBP_CELLULAR_RESPONSE_TO_HEAT	1/171	67/17872	0.475517540551081	0.59940608672433	0.50915949680122	HSP90AA1	1
GOBP_GLOMERULUS_DEVELOPMENT	GOBP_GLOMERULUS_DEVELOPMENT	GOBP_GLOMERULUS_DEVELOPMENT	1/171	67/17872	0.475517540551081	0.59940608672433	0.50915949680122	SULF2	1
GOBP_NECROTIC_CELL_DEATH	GOBP_NECROTIC_CELL_DEATH	GOBP_NECROTIC_CELL_DEATH	1/171	67/17872	0.475517540551081	0.59940608672433	0.50915949680122	TSPO	1
GOBP_PROTEIN_K48_LINKED_UBIQUITINATION	GOBP_PROTEIN_K48_LINKED_UBIQUITINATION	GOBP_PROTEIN_K48_LINKED_UBIQUITINATION	1/171	67/17872	0.475517540551081	0.59940608672433	0.50915949680122	GABARAP	1
GOBP_PROTEIN_LOCALIZATION_TO_SYNAPSE	GOBP_PROTEIN_LOCALIZATION_TO_SYNAPSE	GOBP_PROTEIN_LOCALIZATION_TO_SYNAPSE	1/171	67/17872	0.475517540551081	0.59940608672433	0.50915949680122	STX3	1
GOBP_REGULATION_OF_ALPHA_BETA_T_CELL_DIFFERENTIATION	GOBP_REGULATION_OF_ALPHA_BETA_T_CELL_DIFFERENTIATION	GOBP_REGULATION_OF_ALPHA_BETA_T_CELL_DIFFERENTIATION	1/171	67/17872	0.475517540551081	0.59940608672433	0.50915949680122	MALT1	1
GOBP_REGULATION_OF_CELLULAR_RESPONSE_TO_INSULIN_STIMULUS	GOBP_REGULATION_OF_CELLULAR_RESPONSE_TO_INSULIN_STIMULUS	GOBP_REGULATION_OF_CELLULAR_RESPONSE_TO_INSULIN_STIMULUS	1/171	67/17872	0.475517540551081	0.59940608672433	0.50915949680122	SLC27A4	1
GOBP_REGULATION_OF_POTASSIUM_ION_TRANSMEMBRANE_TRANSPORTER_ACTIVITY	GOBP_REGULATION_OF_POTASSIUM_ION_TRANSMEMBRANE_TRANSPORTER_ACTIVITY	GOBP_REGULATION_OF_POTASSIUM_ION_TRANSMEMBRANE_TRANSPORTER_ACTIVITY	1/171	67/17872	0.475517540551081	0.59940608672433	0.50915949680122	OXSR1	1
GOBP_REGULATION_OF_SODIUM_ION_TRANSMEMBRANE_TRANSPORT	GOBP_REGULATION_OF_SODIUM_ION_TRANSMEMBRANE_TRANSPORT	GOBP_REGULATION_OF_SODIUM_ION_TRANSMEMBRANE_TRANSPORT	1/171	67/17872	0.475517540551081	0.59940608672433	0.50915949680122	FXYD5	1
GOBP_STRIATED_MUSCLE_CELL_DEVELOPMENT	GOBP_STRIATED_MUSCLE_CELL_DEVELOPMENT	GOBP_STRIATED_MUSCLE_CELL_DEVELOPMENT	1/171	67/17872	0.475517540551081	0.59940608672433	0.50915949680122	ACTG1	1
GOBP_NEGATIVE_REGULATION_OF_SECRETION	GOBP_NEGATIVE_REGULATION_OF_SECRETION	GOBP_NEGATIVE_REGULATION_OF_SECRETION	2/171	167/17872	0.476204977452747	0.599916590812357	0.509593139385658	VAMP8/APOE	2
GOBP_AMYLOID_PRECURSOR_PROTEIN_CATABOLIC_PROCESS	GOBP_AMYLOID_PRECURSOR_PROTEIN_CATABOLIC_PROCESS	GOBP_AMYLOID_PRECURSOR_PROTEIN_CATABOLIC_PROCESS	1/171	68/17872	0.480554693068114	0.603606249601817	0.512727283089263	APOE	1
GOBP_GLYCEROLIPID_CATABOLIC_PROCESS	GOBP_GLYCEROLIPID_CATABOLIC_PROCESS	GOBP_GLYCEROLIPID_CATABOLIC_PROCESS	1/171	68/17872	0.480554693068114	0.603606249601817	0.512727283089263	APOC1	1
GOBP_NEGATIVE_REGULATION_OF_PROTEIN_SECRETION	GOBP_NEGATIVE_REGULATION_OF_PROTEIN_SECRETION	GOBP_NEGATIVE_REGULATION_OF_PROTEIN_SECRETION	1/171	68/17872	0.480554693068114	0.603606249601817	0.512727283089263	APOE	1
GOBP_PIGMENT_BIOSYNTHETIC_PROCESS	GOBP_PIGMENT_BIOSYNTHETIC_PROCESS	GOBP_PIGMENT_BIOSYNTHETIC_PROCESS	1/171	68/17872	0.480554693068114	0.603606249601817	0.512727283089263	TSPO	1
GOBP_REGULATION_OF_PHOSPHOLIPASE_ACTIVITY	GOBP_REGULATION_OF_PHOSPHOLIPASE_ACTIVITY	GOBP_REGULATION_OF_PHOSPHOLIPASE_ACTIVITY	1/171	68/17872	0.480554693068114	0.603606249601817	0.512727283089263	PPT1	1
GOBP_POSITIVE_REGULATION_OF_DEVELOPMENTAL_GROWTH	GOBP_POSITIVE_REGULATION_OF_DEVELOPMENTAL_GROWTH	GOBP_POSITIVE_REGULATION_OF_DEVELOPMENTAL_GROWTH	2/171	169/17872	0.482425769495234	0.605240599177719	0.514115564967098	EZR/SERP1	2
GOBP_REGULATION_OF_PRODUCTION_OF_MOLECULAR_MEDIATOR_OF_IMMUNE_RESPONSE	GOBP_REGULATION_OF_PRODUCTION_OF_MOLECULAR_MEDIATOR_OF_IMMUNE_RESPONSE	GOBP_REGULATION_OF_PRODUCTION_OF_MOLECULAR_MEDIATOR_OF_IMMUNE_RESPONSE	2/171	169/17872	0.482425769495234	0.605240599177719	0.514115564967098	CD36/MALT1	2
GOBP_CARBOHYDRATE_DERIVATIVE_CATABOLIC_PROCESS	GOBP_CARBOHYDRATE_DERIVATIVE_CATABOLIC_PROCESS	GOBP_CARBOHYDRATE_DERIVATIVE_CATABOLIC_PROCESS	2/171	170/17872	0.485519198272918	0.607716512881508	0.516218705064379	CST3/NPL	2
GOBP_NEGATIVE_REGULATION_OF_CHEMOTAXIS	GOBP_NEGATIVE_REGULATION_OF_CHEMOTAXIS	GOBP_NEGATIVE_REGULATION_OF_CHEMOTAXIS	1/171	69/17872	0.485543748757024	0.607716512881508	0.516218705064379	AIF1	1
GOBP_POSITIVE_REGULATION_OF_ALPHA_BETA_T_CELL_ACTIVATION	GOBP_POSITIVE_REGULATION_OF_ALPHA_BETA_T_CELL_ACTIVATION	GOBP_POSITIVE_REGULATION_OF_ALPHA_BETA_T_CELL_ACTIVATION	1/171	69/17872	0.485543748757024	0.607716512881508	0.516218705064379	MALT1	1
GOBP_REGULATION_OF_INSULIN_RECEPTOR_SIGNALING_PATHWAY	GOBP_REGULATION_OF_INSULIN_RECEPTOR_SIGNALING_PATHWAY	GOBP_REGULATION_OF_INSULIN_RECEPTOR_SIGNALING_PATHWAY	1/171	69/17872	0.485543748757024	0.607716512881508	0.516218705064379	SLC27A4	1
GOBP_BIOMINERALIZATION	GOBP_BIOMINERALIZATION	GOBP_BIOMINERALIZATION	2/171	171/17872	0.488601223821815	0.611183156300079	0.519163410594874	HIF1A/FAM20A	2
GOBP_CELLULAR_RESPONSE_TO_MECHANICAL_STIMULUS	GOBP_CELLULAR_RESPONSE_TO_MECHANICAL_STIMULUS	GOBP_CELLULAR_RESPONSE_TO_MECHANICAL_STIMULUS	1/171	70/17872	0.490485164190521	0.611379394800861	0.519330103423865	CYBA	1
GOBP_EMBRYONIC_HEART_TUBE_MORPHOGENESIS	GOBP_EMBRYONIC_HEART_TUBE_MORPHOGENESIS	GOBP_EMBRYONIC_HEART_TUBE_MORPHOGENESIS	1/171	70/17872	0.490485164190521	0.611379394800861	0.519330103423865	HIF1A	1
GOBP_NEGATIVE_REGULATION_OF_MUSCLE_CELL_DIFFERENTIATION	GOBP_NEGATIVE_REGULATION_OF_MUSCLE_CELL_DIFFERENTIATION	GOBP_NEGATIVE_REGULATION_OF_MUSCLE_CELL_DIFFERENTIATION	1/171	70/17872	0.490485164190521	0.611379394800861	0.519330103423865	YBX1	1
GOBP_POSITIVE_REGULATION_OF_DNA_RECOMBINATION	GOBP_POSITIVE_REGULATION_OF_DNA_RECOMBINATION	GOBP_POSITIVE_REGULATION_OF_DNA_RECOMBINATION	1/171	70/17872	0.490485164190521	0.611379394800861	0.519330103423865	ACTB	1
GOBP_REGULATION_OF_BEHAVIOR	GOBP_REGULATION_OF_BEHAVIOR	GOBP_REGULATION_OF_BEHAVIOR	1/171	70/17872	0.490485164190521	0.611379394800861	0.519330103423865	APOE	1
GOBP_REGULATION_OF_DOUBLE_STRAND_BREAK_REPAIR_VIA_HOMOLOGOUS_RECOMBINATION	GOBP_REGULATION_OF_DOUBLE_STRAND_BREAK_REPAIR_VIA_HOMOLOGOUS_RECOMBINATION	GOBP_REGULATION_OF_DOUBLE_STRAND_BREAK_REPAIR_VIA_HOMOLOGOUS_RECOMBINATION	1/171	70/17872	0.490485164190521	0.611379394800861	0.519330103423865	ACTB	1
GOBP_NEURON_PROJECTION_EXTENSION	GOBP_NEURON_PROJECTION_EXTENSION	GOBP_NEURON_PROJECTION_EXTENSION	2/171	172/17872	0.491671780253947	0.612499038861808	0.52028117385724	APOE/HSP90AA1	2
GOBP_LIPID_HOMEOSTASIS	GOBP_LIPID_HOMEOSTASIS	GOBP_LIPID_HOMEOSTASIS	2/171	173/17872	0.494730803965452	0.615673392526382	0.522977596783734	NPC2/APOE	2
GOBP_LAMELLIPODIUM_ASSEMBLY	GOBP_LAMELLIPODIUM_ASSEMBLY	GOBP_LAMELLIPODIUM_ASSEMBLY	1/171	71/17872	0.495379391632574	0.615673392526382	0.522977596783734	ARPC2	1
GOBP_MITOTIC_CYTOKINESIS	GOBP_MITOTIC_CYTOKINESIS	GOBP_MITOTIC_CYTOKINESIS	1/171	71/17872	0.495379391632574	0.615673392526382	0.522977596783734	TTC19	1
GOBP_POSITIVE_REGULATION_OF_CATION_CHANNEL_ACTIVITY	GOBP_POSITIVE_REGULATION_OF_CATION_CHANNEL_ACTIVITY	GOBP_POSITIVE_REGULATION_OF_CATION_CHANNEL_ACTIVITY	1/171	71/17872	0.495379391632574	0.615673392526382	0.522977596783734	TMSB4X	1
GOBP_CHAPERONE_MEDIATED_PROTEIN_FOLDING	GOBP_CHAPERONE_MEDIATED_PROTEIN_FOLDING	GOBP_CHAPERONE_MEDIATED_PROTEIN_FOLDING	1/171	72/17872	0.500226879078831	0.621334439276864	0.527786316245686	HSPA8	1
GOBP_TISSUE_REMODELING	GOBP_TISSUE_REMODELING	GOBP_TISSUE_REMODELING	2/171	175/17872	0.500814010009003	0.621700150356003	0.52809696585895	HIF1A/CST3	2
GOBP_STEROID_BIOSYNTHETIC_PROCESS	GOBP_STEROID_BIOSYNTHETIC_PROCESS	GOBP_STEROID_BIOSYNTHETIC_PROCESS	2/171	176/17872	0.503838076221558	0.625088828209456	0.530975444321046	TSPO/APOE	2
GOBP_CARDIAC_VENTRICLE_MORPHOGENESIS	GOBP_CARDIAC_VENTRICLE_MORPHOGENESIS	GOBP_CARDIAC_VENTRICLE_MORPHOGENESIS	1/171	73/17872	0.505028070296669	0.62510467442315	0.530988904728555	HIF1A	1
GOBP_HISTONE_H4_ACETYLATION	GOBP_HISTONE_H4_ACETYLATION	GOBP_HISTONE_H4_ACETYLATION	1/171	73/17872	0.505028070296669	0.62510467442315	0.530988904728555	ACTB	1
GOBP_POSITIVE_REGULATION_OF_DNA_BIOSYNTHETIC_PROCESS	GOBP_POSITIVE_REGULATION_OF_DNA_BIOSYNTHETIC_PROCESS	GOBP_POSITIVE_REGULATION_OF_DNA_BIOSYNTHETIC_PROCESS	1/171	73/17872	0.505028070296669	0.62510467442315	0.530988904728555	HSP90AA1	1
GOBP_POSITIVE_REGULATION_OF_MACROAUTOPHAGY	GOBP_POSITIVE_REGULATION_OF_MACROAUTOPHAGY	GOBP_POSITIVE_REGULATION_OF_MACROAUTOPHAGY	1/171	73/17872	0.505028070296669	0.62510467442315	0.530988904728555	HIF1A	1
GOBP_CELLULAR_RESPONSE_TO_VASCULAR_ENDOTHELIAL_GROWTH_FACTOR_STIMULUS	GOBP_CELLULAR_RESPONSE_TO_VASCULAR_ENDOTHELIAL_GROWTH_FACTOR_STIMULUS	GOBP_CELLULAR_RESPONSE_TO_VASCULAR_ENDOTHELIAL_GROWTH_FACTOR_STIMULUS	1/171	74/17872	0.509783404864862	0.629889442660249	0.535053278183996	CD63	1
GOBP_FATTY_ACID_DERIVATIVE_METABOLIC_PROCESS	GOBP_FATTY_ACID_DERIVATIVE_METABOLIC_PROCESS	GOBP_FATTY_ACID_DERIVATIVE_METABOLIC_PROCESS	1/171	74/17872	0.509783404864862	0.629889442660249	0.535053278183996	PPT1	1
GOBP_REGULATION_OF_ATP_DEPENDENT_ACTIVITY	GOBP_REGULATION_OF_ATP_DEPENDENT_ACTIVITY	GOBP_REGULATION_OF_ATP_DEPENDENT_ACTIVITY	1/171	74/17872	0.509783404864862	0.629889442660249	0.535053278183996	PFN1	1
GOBP_MUSCLE_CELL_DIFFERENTIATION	GOBP_MUSCLE_CELL_DIFFERENTIATION	GOBP_MUSCLE_CELL_DIFFERENTIATION	4/171	389/17872	0.512781609599669	0.632929138073753	0.537635317007837	GPX1/ACTG1/YBX1/CD9	4
GOBP_RESPONSE_TO_TEMPERATURE_STIMULUS	GOBP_RESPONSE_TO_TEMPERATURE_STIMULUS	GOBP_RESPONSE_TO_TEMPERATURE_STIMULUS	2/171	179/17872	0.512839475812113	0.632929138073753	0.537635317007837	CD14/HSP90AA1	2
GOBP_CELLULAR_RESPONSE_TO_IONIZING_RADIATION	GOBP_CELLULAR_RESPONSE_TO_IONIZING_RADIATION	GOBP_CELLULAR_RESPONSE_TO_IONIZING_RADIATION	1/171	75/17872	0.514493318212885	0.634233202486458	0.538743041461884	CYBA	1
GOBP_INFLAMMATORY_RESPONSE_TO_ANTIGENIC_STIMULUS	GOBP_INFLAMMATORY_RESPONSE_TO_ANTIGENIC_STIMULUS	GOBP_INFLAMMATORY_RESPONSE_TO_ANTIGENIC_STIMULUS	1/171	75/17872	0.514493318212885	0.634233202486458	0.538743041461884	GPX1	1
GOBP_ENDOCYTIC_RECYCLING	GOBP_ENDOCYTIC_RECYCLING	GOBP_ENDOCYTIC_RECYCLING	1/171	76/17872	0.519158241659848	0.639612590072806	0.54331250836792	ARL4C	1
GOBP_REGULATION_OF_HORMONE_LEVELS	GOBP_REGULATION_OF_HORMONE_LEVELS	GOBP_REGULATION_OF_HORMONE_LEVELS	5/171	499/17872	0.521752639642837	0.642436293681963	0.545711075116902	VAMP8/HIF1A/TSPO/SELENOT/SERP1	5
GOBP_CELLULAR_CARBOHYDRATE_METABOLIC_PROCESS	GOBP_CELLULAR_CARBOHYDRATE_METABOLIC_PROCESS	GOBP_CELLULAR_CARBOHYDRATE_METABOLIC_PROCESS	3/171	288/17872	0.522242123491635	0.642666437019834	0.545906568070173	RANBP2/INPP5A/TPI1	3
GOBP_NEGATIVE_REGULATION_OF_CELLULAR_PROTEIN_CATABOLIC_PROCESS	GOBP_NEGATIVE_REGULATION_OF_CELLULAR_PROTEIN_CATABOLIC_PROCESS	GOBP_NEGATIVE_REGULATION_OF_CELLULAR_PROTEIN_CATABOLIC_PROCESS	1/171	77/17872	0.523778602453069	0.642680641141348	0.545918633618927	RPL11	1
GOBP_NEGATIVE_REGULATION_OF_ENDOTHELIAL_CELL_PROLIFERATION	GOBP_NEGATIVE_REGULATION_OF_ENDOTHELIAL_CELL_PROLIFERATION	GOBP_NEGATIVE_REGULATION_OF_ENDOTHELIAL_CELL_PROLIFERATION	1/171	77/17872	0.523778602453069	0.642680641141348	0.545918633618927	APOE	1
GOBP_POSITIVE_REGULATION_OF_CARBOHYDRATE_METABOLIC_PROCESS	GOBP_POSITIVE_REGULATION_OF_CARBOHYDRATE_METABOLIC_PROCESS	GOBP_POSITIVE_REGULATION_OF_CARBOHYDRATE_METABOLIC_PROCESS	1/171	77/17872	0.523778602453069	0.642680641141348	0.545918633618927	HIF1A	1
GOBP_SELECTIVE_AUTOPHAGY	GOBP_SELECTIVE_AUTOPHAGY	GOBP_SELECTIVE_AUTOPHAGY	1/171	77/17872	0.523778602453069	0.642680641141348	0.545918633618927	MAP1LC3B	1
GOBP_MUSCLE_CELL_DEVELOPMENT	GOBP_MUSCLE_CELL_DEVELOPMENT	GOBP_MUSCLE_CELL_DEVELOPMENT	2/171	183/17872	0.524674308728389	0.642680641141348	0.545918633618927	GPX1/ACTG1	2
GOBP_POSITIVE_REGULATION_OF_VASCULATURE_DEVELOPMENT	GOBP_POSITIVE_REGULATION_OF_VASCULATURE_DEVELOPMENT	GOBP_POSITIVE_REGULATION_OF_VASCULATURE_DEVELOPMENT	2/171	183/17872	0.524674308728389	0.642680641141348	0.545918633618927	HIF1A/GRN	2
GOBP_REGULATION_OF_BLOOD_PRESSURE	GOBP_REGULATION_OF_BLOOD_PRESSURE	GOBP_REGULATION_OF_BLOOD_PRESSURE	2/171	183/17872	0.524674308728389	0.642680641141348	0.545918633618927	CYBA/ANPEP	2
GOBP_REGULATION_OF_CARBOHYDRATE_METABOLIC_PROCESS	GOBP_REGULATION_OF_CARBOHYDRATE_METABOLIC_PROCESS	GOBP_REGULATION_OF_CARBOHYDRATE_METABOLIC_PROCESS	2/171	183/17872	0.524674308728389	0.642680641141348	0.545918633618927	HIF1A/RANBP2	2
GOBP_ENDODERM_DEVELOPMENT	GOBP_ENDODERM_DEVELOPMENT	GOBP_ENDODERM_DEVELOPMENT	1/171	78/17872	0.528354823806288	0.645328145925564	0.548167530040845	ITGB2	1
GOBP_NEGATIVE_REGULATION_OF_BLOOD_VESSEL_ENDOTHELIAL_CELL_MIGRATION	GOBP_NEGATIVE_REGULATION_OF_BLOOD_VESSEL_ENDOTHELIAL_CELL_MIGRATION	GOBP_NEGATIVE_REGULATION_OF_BLOOD_VESSEL_ENDOTHELIAL_CELL_MIGRATION	1/171	78/17872	0.528354823806288	0.645328145925564	0.548167530040845	APOE	1
GOBP_NEGATIVE_REGULATION_OF_RNA_CATABOLIC_PROCESS	GOBP_NEGATIVE_REGULATION_OF_RNA_CATABOLIC_PROCESS	GOBP_NEGATIVE_REGULATION_OF_RNA_CATABOLIC_PROCESS	1/171	78/17872	0.528354823806288	0.645328145925564	0.548167530040845	YBX1	1
GOBP_REGULATION_OF_GLUCOSE_TRANSMEMBRANE_TRANSPORT	GOBP_REGULATION_OF_GLUCOSE_TRANSMEMBRANE_TRANSPORT	GOBP_REGULATION_OF_GLUCOSE_TRANSMEMBRANE_TRANSPORT	1/171	78/17872	0.528354823806288	0.645328145925564	0.548167530040845	FABP5	1
GOBP_T_CELL_DIFFERENTIATION_IN_THYMUS	GOBP_T_CELL_DIFFERENTIATION_IN_THYMUS	GOBP_T_CELL_DIFFERENTIATION_IN_THYMUS	1/171	78/17872	0.528354823806288	0.645328145925564	0.548167530040845	RPS6	1
GOBP_DEFENSE_RESPONSE_TO_SYMBIONT	GOBP_DEFENSE_RESPONSE_TO_SYMBIONT	GOBP_DEFENSE_RESPONSE_TO_SYMBIONT	3/171	291/17872	0.52922914494704	0.646024542452594	0.548759077095721	VAMP8/PYCARD/HSP90AA1	3
GOBP_ARTERY_MORPHOGENESIS	GOBP_ARTERY_MORPHOGENESIS	GOBP_ARTERY_MORPHOGENESIS	1/171	79/17872	0.532887324937519	0.648535652782365	0.550892114614418	APOE	1
GOBP_GLUCOSE_IMPORT	GOBP_GLUCOSE_IMPORT	GOBP_GLUCOSE_IMPORT	1/171	79/17872	0.532887324937519	0.648535652782365	0.550892114614418	SLC27A4	1
GOBP_GLUTAMINE_FAMILY_AMINO_ACID_METABOLIC_PROCESS	GOBP_GLUTAMINE_FAMILY_AMINO_ACID_METABOLIC_PROCESS	GOBP_GLUTAMINE_FAMILY_AMINO_ACID_METABOLIC_PROCESS	1/171	79/17872	0.532887324937519	0.648535652782365	0.550892114614418	DDAH2	1
GOBP_INTRINSIC_APOPTOTIC_SIGNALING_PATHWAY_BY_P53_CLASS_MEDIATOR	GOBP_INTRINSIC_APOPTOTIC_SIGNALING_PATHWAY_BY_P53_CLASS_MEDIATOR	GOBP_INTRINSIC_APOPTOTIC_SIGNALING_PATHWAY_BY_P53_CLASS_MEDIATOR	1/171	79/17872	0.532887324937519	0.648535652782365	0.550892114614418	PYCARD	1
GOBP_POSITIVE_REGULATION_OF_CELL_MORPHOGENESIS_INVOLVED_IN_DIFFERENTIATION	GOBP_POSITIVE_REGULATION_OF_CELL_MORPHOGENESIS_INVOLVED_IN_DIFFERENTIATION	GOBP_POSITIVE_REGULATION_OF_CELL_MORPHOGENESIS_INVOLVED_IN_DIFFERENTIATION	1/171	79/17872	0.532887324937519	0.648535652782365	0.550892114614418	ARPC2	1
GOBP_NEGATIVE_REGULATION_OF_CELL_GROWTH	GOBP_NEGATIVE_REGULATION_OF_CELL_GROWTH	GOBP_NEGATIVE_REGULATION_OF_CELL_GROWTH	2/171	186/17872	0.533423627782858	0.648535652782365	0.550892114614418	RACK1/PPT1	2
GOBP_REGULATION_OF_CELL_DIVISION	GOBP_REGULATION_OF_CELL_DIVISION	GOBP_REGULATION_OF_CELL_DIVISION	2/171	186/17872	0.533423627782858	0.648535652782365	0.550892114614418	RACK1/YBX1	2
GOBP_DEVELOPMENTAL_MATURATION	GOBP_DEVELOPMENTAL_MATURATION	GOBP_DEVELOPMENTAL_MATURATION	3/171	294/17872	0.536159696420607	0.650734168090265	0.552759621422695	HIF1A/PFN1/CD63	3
GOBP_PROTEIN_LOCALIZATION_TO_NUCLEUS	GOBP_PROTEIN_LOCALIZATION_TO_NUCLEUS	GOBP_PROTEIN_LOCALIZATION_TO_NUCLEUS	3/171	294/17872	0.536159696420607	0.650734168090265	0.552759621422695	RPL11/RANBP2/CD36	3
GOBP_PROTEIN_HOMOOLIGOMERIZATION	GOBP_PROTEIN_HOMOOLIGOMERIZATION	GOBP_PROTEIN_HOMOOLIGOMERIZATION	2/171	187/17872	0.536315708557504	0.650734168090265	0.552759621422695	PYCARD/ALDOA	2
GOBP_CENTRAL_NERVOUS_SYSTEM_NEURON_DEVELOPMENT	GOBP_CENTRAL_NERVOUS_SYSTEM_NEURON_DEVELOPMENT	GOBP_CENTRAL_NERVOUS_SYSTEM_NEURON_DEVELOPMENT	1/171	80/17872	0.537376521106556	0.650734168090265	0.552759621422695	HSP90AA1	1
GOBP_PROTEOGLYCAN_METABOLIC_PROCESS	GOBP_PROTEOGLYCAN_METABOLIC_PROCESS	GOBP_PROTEOGLYCAN_METABOLIC_PROCESS	1/171	80/17872	0.537376521106556	0.650734168090265	0.552759621422695	SULF2	1
GOBP_REGULATION_OF_BONE_MINERALIZATION	GOBP_REGULATION_OF_BONE_MINERALIZATION	GOBP_REGULATION_OF_BONE_MINERALIZATION	1/171	80/17872	0.537376521106556	0.650734168090265	0.552759621422695	HIF1A	1
GOBP_REGULATION_OF_RELEASE_OF_SEQUESTERED_CALCIUM_ION_INTO_CYTOSOL	GOBP_REGULATION_OF_RELEASE_OF_SEQUESTERED_CALCIUM_ION_INTO_CYTOSOL	GOBP_REGULATION_OF_RELEASE_OF_SEQUESTERED_CALCIUM_ION_INTO_CYTOSOL	1/171	80/17872	0.537376521106556	0.650734168090265	0.552759621422695	CYBA	1
GOBP_CELLULAR_RESPONSE_TO_RADIATION	GOBP_CELLULAR_RESPONSE_TO_RADIATION	GOBP_CELLULAR_RESPONSE_TO_RADIATION	2/171	188/17872	0.539195552493257	0.652193253699133	0.553999027079152	CYBA/CARD16	2
GOBP_REGULATION_OF_ADAPTIVE_IMMUNE_RESPONSE	GOBP_REGULATION_OF_ADAPTIVE_IMMUNE_RESPONSE	GOBP_REGULATION_OF_ADAPTIVE_IMMUNE_RESPONSE	2/171	188/17872	0.539195552493257	0.652193253699133	0.553999027079152	PYCARD/MALT1	2
GOBP_MUSCLE_ORGAN_MORPHOGENESIS	GOBP_MUSCLE_ORGAN_MORPHOGENESIS	GOBP_MUSCLE_ORGAN_MORPHOGENESIS	1/171	81/17872	0.541822823652126	0.653139431008579	0.554802747917883	SERP1	1
GOBP_NERVE_DEVELOPMENT	GOBP_NERVE_DEVELOPMENT	GOBP_NERVE_DEVELOPMENT	1/171	81/17872	0.541822823652126	0.653139431008579	0.554802747917883	SULF2	1
GOBP_OUTFLOW_TRACT_MORPHOGENESIS	GOBP_OUTFLOW_TRACT_MORPHOGENESIS	GOBP_OUTFLOW_TRACT_MORPHOGENESIS	1/171	81/17872	0.541822823652126	0.653139431008579	0.554802747917883	HIF1A	1
GOBP_PANCREAS_DEVELOPMENT	GOBP_PANCREAS_DEVELOPMENT	GOBP_PANCREAS_DEVELOPMENT	1/171	81/17872	0.541822823652126	0.653139431008579	0.554802747917883	SELENOT	1
GOBP_POSITIVE_REGULATION_OF_ORGANELLE_ASSEMBLY	GOBP_POSITIVE_REGULATION_OF_ORGANELLE_ASSEMBLY	GOBP_POSITIVE_REGULATION_OF_ORGANELLE_ASSEMBLY	1/171	81/17872	0.541822823652126	0.653139431008579	0.554802747917883	CAPG	1
GOBP_REGULATION_OF_TRANSLATIONAL_INITIATION	GOBP_REGULATION_OF_TRANSLATIONAL_INITIATION	GOBP_REGULATION_OF_TRANSLATIONAL_INITIATION	1/171	81/17872	0.541822823652126	0.653139431008579	0.554802747917883	EIF1	1
GOBP_NEGATIVE_REGULATION_OF_DNA_BINDING_TRANSCRIPTION_FACTOR_ACTIVITY	GOBP_NEGATIVE_REGULATION_OF_DNA_BINDING_TRANSCRIPTION_FACTOR_ACTIVITY	GOBP_NEGATIVE_REGULATION_OF_DNA_BINDING_TRANSCRIPTION_FACTOR_ACTIVITY	2/171	190/17872	0.544918404385919	0.6558425005206	0.557098843241307	TMSB4X/PYCARD	2
GOBP_CD4_POSITIVE_ALPHA_BETA_T_CELL_DIFFERENTIATION	GOBP_CD4_POSITIVE_ALPHA_BETA_T_CELL_DIFFERENTIATION	GOBP_CD4_POSITIVE_ALPHA_BETA_T_CELL_DIFFERENTIATION	1/171	82/17872	0.546226640028692	0.6558425005206	0.557098843241307	MALT1	1
GOBP_NEGATIVE_REGULATION_OF_PROTEIN_CONTAINING_COMPLEX_DISASSEMBLY	GOBP_NEGATIVE_REGULATION_OF_PROTEIN_CONTAINING_COMPLEX_DISASSEMBLY	GOBP_NEGATIVE_REGULATION_OF_PROTEIN_CONTAINING_COMPLEX_DISASSEMBLY	1/171	82/17872	0.546226640028692	0.6558425005206	0.557098843241307	CAPG	1
GOBP_NEGATIVE_REGULATION_OF_RESPONSE_TO_DNA_DAMAGE_STIMULUS	GOBP_NEGATIVE_REGULATION_OF_RESPONSE_TO_DNA_DAMAGE_STIMULUS	GOBP_NEGATIVE_REGULATION_OF_RESPONSE_TO_DNA_DAMAGE_STIMULUS	1/171	82/17872	0.546226640028692	0.6558425005206	0.557098843241307	RPS3	1
GOBP_REGULATION_OF_RESPONSE_TO_ENDOPLASMIC_RETICULUM_STRESS	GOBP_REGULATION_OF_RESPONSE_TO_ENDOPLASMIC_RETICULUM_STRESS	GOBP_REGULATION_OF_RESPONSE_TO_ENDOPLASMIC_RETICULUM_STRESS	1/171	82/17872	0.546226640028692	0.6558425005206	0.557098843241307	RACK1	1
GOBP_REGULATION_OF_SMOOTHENED_SIGNALING_PATHWAY	GOBP_REGULATION_OF_SMOOTHENED_SIGNALING_PATHWAY	GOBP_REGULATION_OF_SMOOTHENED_SIGNALING_PATHWAY	1/171	82/17872	0.546226640028692	0.6558425005206	0.557098843241307	RACK1	1
GOBP_TIGHT_JUNCTION_ORGANIZATION	GOBP_TIGHT_JUNCTION_ORGANIZATION	GOBP_TIGHT_JUNCTION_ORGANIZATION	1/171	82/17872	0.546226640028692	0.6558425005206	0.557098843241307	ACTG1	1
GOBP_REGULATION_OF_DNA_METABOLIC_PROCESS	GOBP_REGULATION_OF_DNA_METABOLIC_PROCESS	GOBP_REGULATION_OF_DNA_METABOLIC_PROCESS	4/171	406/17872	0.546555862850152	0.655867035420182	0.557119684166018	ACTB/RPS3/HSP90AA1/SUB1	4
GOBP_REGULATION_OF_SMALL_GTPASE_MEDIATED_SIGNAL_TRANSDUCTION	GOBP_REGULATION_OF_SMALL_GTPASE_MEDIATED_SIGNAL_TRANSDUCTION	GOBP_REGULATION_OF_SMALL_GTPASE_MEDIATED_SIGNAL_TRANSDUCTION	3/171	300/17872	0.549847316965796	0.659444213006974	0.560158281838613	APOE/GABARAP/ARHGDIB	3
GOBP_FOCAL_ADHESION_ASSEMBLY	GOBP_FOCAL_ADHESION_ASSEMBLY	GOBP_FOCAL_ADHESION_ASSEMBLY	1/171	83/17872	0.550588373842919	0.659588102674766	0.56028050747574	ACTG1	1
GOBP_MONOAMINE_TRANSPORT	GOBP_MONOAMINE_TRANSPORT	GOBP_MONOAMINE_TRANSPORT	1/171	83/17872	0.550588373842919	0.659588102674766	0.56028050747574	ACTB	1
GOBP_REGULATION_OF_B_CELL_ACTIVATION	GOBP_REGULATION_OF_B_CELL_ACTIVATION	GOBP_REGULATION_OF_B_CELL_ACTIVATION	2/171	193/17872	0.553410166200291	0.66259481003913	0.562834524931643	TYROBP/MNDA	2
GOBP_EMBRYONIC_HEART_TUBE_DEVELOPMENT	GOBP_EMBRYONIC_HEART_TUBE_DEVELOPMENT	GOBP_EMBRYONIC_HEART_TUBE_DEVELOPMENT	1/171	84/17872	0.554908424889794	0.66289397888972	0.563088650915344	HIF1A	1
GOBP_MICROTUBULE_POLYMERIZATION	GOBP_MICROTUBULE_POLYMERIZATION	GOBP_MICROTUBULE_POLYMERIZATION	1/171	84/17872	0.554908424889794	0.66289397888972	0.563088650915344	RPS3	1
GOBP_NEGATIVE_REGULATION_OF_ION_TRANSMEMBRANE_TRANSPORTER_ACTIVITY	GOBP_NEGATIVE_REGULATION_OF_ION_TRANSMEMBRANE_TRANSPORTER_ACTIVITY	GOBP_NEGATIVE_REGULATION_OF_ION_TRANSMEMBRANE_TRANSPORTER_ACTIVITY	1/171	84/17872	0.554908424889794	0.66289397888972	0.563088650915344	OXSR1	1
GOBP_SMAD_PROTEIN_SIGNAL_TRANSDUCTION	GOBP_SMAD_PROTEIN_SIGNAL_TRANSDUCTION	GOBP_SMAD_PROTEIN_SIGNAL_TRANSDUCTION	1/171	84/17872	0.554908424889794	0.66289397888972	0.563088650915344	SUB1	1
GOBP_CARTILAGE_DEVELOPMENT	GOBP_CARTILAGE_DEVELOPMENT	GOBP_CARTILAGE_DEVELOPMENT	2/171	194/17872	0.556215980426998	0.663762835947692	0.563826692840888	HIF1A/SULF2	2
GOBP_RESPONSE_TO_XENOBIOTIC_STIMULUS	GOBP_RESPONSE_TO_XENOBIOTIC_STIMULUS	GOBP_RESPONSE_TO_XENOBIOTIC_STIMULUS	4/171	411/17872	0.556260757055975	0.663762835947692	0.563826692840888	CYBA/GPX1/TSPO/GSTP1	4
GOBP_ENDOCRINE_PROCESS	GOBP_ENDOCRINE_PROCESS	GOBP_ENDOCRINE_PROCESS	1/171	85/17872	0.559187189188413	0.664641068738775	0.564572698889018	CYBA	1
GOBP_FIBROBLAST_GROWTH_FACTOR_RECEPTOR_SIGNALING_PATHWAY	GOBP_FIBROBLAST_GROWTH_FACTOR_RECEPTOR_SIGNALING_PATHWAY	GOBP_FIBROBLAST_GROWTH_FACTOR_RECEPTOR_SIGNALING_PATHWAY	1/171	85/17872	0.559187189188413	0.664641068738775	0.564572698889018	SULF2	1
GOBP_ORGANELLE_TRANSPORT_ALONG_MICROTUBULE	GOBP_ORGANELLE_TRANSPORT_ALONG_MICROTUBULE	GOBP_ORGANELLE_TRANSPORT_ALONG_MICROTUBULE	1/171	85/17872	0.559187189188413	0.664641068738775	0.564572698889018	HIF1A	1
GOBP_POSITIVE_REGULATION_OF_LIPID_BIOSYNTHETIC_PROCESS	GOBP_POSITIVE_REGULATION_OF_LIPID_BIOSYNTHETIC_PROCESS	GOBP_POSITIVE_REGULATION_OF_LIPID_BIOSYNTHETIC_PROCESS	1/171	85/17872	0.559187189188413	0.664641068738775	0.564572698889018	APOE	1
GOBP_REGULATION_OF_LEUKOCYTE_APOPTOTIC_PROCESS	GOBP_REGULATION_OF_LEUKOCYTE_APOPTOTIC_PROCESS	GOBP_REGULATION_OF_LEUKOCYTE_APOPTOTIC_PROCESS	1/171	85/17872	0.559187189188413	0.664641068738775	0.564572698889018	HIF1A	1
GOBP_REGULATION_OF_LEUKOCYTE_MEDIATED_CYTOTOXICITY	GOBP_REGULATION_OF_LEUKOCYTE_MEDIATED_CYTOTOXICITY	GOBP_REGULATION_OF_LEUKOCYTE_MEDIATED_CYTOTOXICITY	1/171	85/17872	0.559187189188413	0.664641068738775	0.564572698889018	TYROBP	1
GOBP_REGULATION_OF_NEURAL_PRECURSOR_CELL_PROLIFERATION	GOBP_REGULATION_OF_NEURAL_PRECURSOR_CELL_PROLIFERATION	GOBP_REGULATION_OF_NEURAL_PRECURSOR_CELL_PROLIFERATION	1/171	85/17872	0.559187189188413	0.664641068738775	0.564572698889018	HIF1A	1
GOBP_PROTEASOME_MEDIATED_UBIQUITIN_DEPENDENT_PROTEIN_CATABOLIC_PROCESS	GOBP_PROTEASOME_MEDIATED_UBIQUITIN_DEPENDENT_PROTEIN_CATABOLIC_PROCESS	GOBP_PROTEASOME_MEDIATED_UBIQUITIN_DEPENDENT_PROTEIN_CATABOLIC_PROCESS	4/171	413/17872	0.560112037537577	0.665367990900343	0.565190175638412	RACK1/RPL11/GABARAP/ELOB	4
GOBP_NEGATIVE_REGULATION_OF_CELL_ADHESION	GOBP_NEGATIVE_REGULATION_OF_CELL_ADHESION	GOBP_NEGATIVE_REGULATION_OF_CELL_ADHESION	3/171	305/17872	0.561072549618151	0.666136442363864	0.565842929037399	ARHGDIB/CD9/FXYD5	3
GOBP_COGNITION	GOBP_COGNITION	GOBP_COGNITION	3/171	306/17872	0.563297457626529	0.667065120040708	0.566631784988489	HIF1A/APOE/PPT1	3
GOBP_VESICLE_ORGANIZATION	GOBP_VESICLE_ORGANIZATION	GOBP_VESICLE_ORGANIZATION	3/171	306/17872	0.563297457626529	0.667065120040708	0.566631784988489	VAMP8/STX3/ZFYVE16	3
GOBP_B_CELL_ACTIVATION_INVOLVED_IN_IMMUNE_RESPONSE	GOBP_B_CELL_ACTIVATION_INVOLVED_IN_IMMUNE_RESPONSE	GOBP_B_CELL_ACTIVATION_INVOLVED_IN_IMMUNE_RESPONSE	1/171	86/17872	0.563425059017434	0.667065120040708	0.566631784988489	LGALS1	1
GOBP_CELL_ADHESION_MEDIATED_BY_INTEGRIN	GOBP_CELL_ADHESION_MEDIATED_BY_INTEGRIN	GOBP_CELL_ADHESION_MEDIATED_BY_INTEGRIN	1/171	86/17872	0.563425059017434	0.667065120040708	0.566631784988489	ITGB2	1
GOBP_MYOBLAST_DIFFERENTIATION	GOBP_MYOBLAST_DIFFERENTIATION	GOBP_MYOBLAST_DIFFERENTIATION	1/171	86/17872	0.563425059017434	0.667065120040708	0.566631784988489	LGALS1	1
GOBP_MICROTUBULE_BASED_TRANSPORT	GOBP_MICROTUBULE_BASED_TRANSPORT	GOBP_MICROTUBULE_BASED_TRANSPORT	2/171	197/17872	0.564558796640702	0.668035032905209	0.56745566775673	HIF1A/HSPA8	2
GOBP_POST_EMBRYONIC_DEVELOPMENT	GOBP_POST_EMBRYONIC_DEVELOPMENT	GOBP_POST_EMBRYONIC_DEVELOPMENT	1/171	87/17872	0.567622422950191	0.670912646825935	0.569900028079915	SERP1	1
GOBP_REGULATION_OF_TISSUE_REMODELING	GOBP_REGULATION_OF_TISSUE_REMODELING	GOBP_REGULATION_OF_TISSUE_REMODELING	1/171	87/17872	0.567622422950191	0.670912646825935	0.569900028079915	CST3	1
GOBP_ACTOMYOSIN_STRUCTURE_ORGANIZATION	GOBP_ACTOMYOSIN_STRUCTURE_ORGANIZATION	GOBP_ACTOMYOSIN_STRUCTURE_ORGANIZATION	2/171	199/17872	0.570058300245228	0.673042706904316	0.571709386279115	PFN1/ACTG1	2
GOBP_NEGATIVE_REGULATION_OF_CELL_CELL_ADHESION	GOBP_NEGATIVE_REGULATION_OF_CELL_CELL_ADHESION	GOBP_NEGATIVE_REGULATION_OF_CELL_CELL_ADHESION	2/171	199/17872	0.570058300245228	0.673042706904316	0.571709386279115	CD9/FXYD5	2
GOBP_EMBRYONIC_PLACENTA_DEVELOPMENT	GOBP_EMBRYONIC_PLACENTA_DEVELOPMENT	GOBP_EMBRYONIC_PLACENTA_DEVELOPMENT	1/171	88/17872	0.571779665889495	0.673203996867676	0.571846392423033	HIF1A	1
GOBP_PROTEIN_TETRAMERIZATION	GOBP_PROTEIN_TETRAMERIZATION	GOBP_PROTEIN_TETRAMERIZATION	1/171	88/17872	0.571779665889495	0.673203996867676	0.571846392423033	ALDOA	1
GOBP_REGULATION_OF_MICROTUBULE_POLYMERIZATION_OR_DEPOLYMERIZATION	GOBP_REGULATION_OF_MICROTUBULE_POLYMERIZATION_OR_DEPOLYMERIZATION	GOBP_REGULATION_OF_MICROTUBULE_POLYMERIZATION_OR_DEPOLYMERIZATION	1/171	88/17872	0.571779665889495	0.673203996867676	0.571846392423033	RPS3	1
GOBP_REGULATION_OF_PROTEIN_DEPOLYMERIZATION	GOBP_REGULATION_OF_PROTEIN_DEPOLYMERIZATION	GOBP_REGULATION_OF_PROTEIN_DEPOLYMERIZATION	1/171	88/17872	0.571779665889495	0.673203996867676	0.571846392423033	CAPG	1
GOBP_REGULATION_OF_T_CELL_MEDIATED_IMMUNITY	GOBP_REGULATION_OF_T_CELL_MEDIATED_IMMUNITY	GOBP_REGULATION_OF_T_CELL_MEDIATED_IMMUNITY	1/171	88/17872	0.571779665889495	0.673203996867676	0.571846392423033	MALT1	1
GOBP_RESPONSE_TO_MECHANICAL_STIMULUS	GOBP_RESPONSE_TO_MECHANICAL_STIMULUS	GOBP_RESPONSE_TO_MECHANICAL_STIMULUS	2/171	201/17872	0.575507759364862	0.675804191808205	0.57405510197208	CYBA/ACTG1	2
GOBP_CELLULAR_RESPONSE_TO_UV	GOBP_CELLULAR_RESPONSE_TO_UV	GOBP_CELLULAR_RESPONSE_TO_UV	1/171	89/17872	0.575897169102096	0.675804191808205	0.57405510197208	CARD16	1
GOBP_LAMELLIPODIUM_ORGANIZATION	GOBP_LAMELLIPODIUM_ORGANIZATION	GOBP_LAMELLIPODIUM_ORGANIZATION	1/171	89/17872	0.575897169102096	0.675804191808205	0.57405510197208	ARPC2	1
GOBP_MESENCHYMAL_CELL_DEVELOPMENT	GOBP_MESENCHYMAL_CELL_DEVELOPMENT	GOBP_MESENCHYMAL_CELL_DEVELOPMENT	1/171	89/17872	0.575897169102096	0.675804191808205	0.57405510197208	HIF1A	1
GOBP_POSITIVE_REGULATION_OF_CELL_DIVISION	GOBP_POSITIVE_REGULATION_OF_CELL_DIVISION	GOBP_POSITIVE_REGULATION_OF_CELL_DIVISION	1/171	89/17872	0.575897169102096	0.675804191808205	0.57405510197208	YBX1	1
GOBP_RESPONSE_TO_CAMP	GOBP_RESPONSE_TO_CAMP	GOBP_RESPONSE_TO_CAMP	1/171	89/17872	0.575897169102096	0.675804191808205	0.57405510197208	EZR	1
GOBP_EXTERNAL_ENCAPSULATING_STRUCTURE_ORGANIZATION	GOBP_EXTERNAL_ENCAPSULATING_STRUCTURE_ORGANIZATION	GOBP_EXTERNAL_ENCAPSULATING_STRUCTURE_ORGANIZATION	3/171	313/17872	0.578680420895136	0.678695314180712	0.576510936914333	SULF2/CST3/CAPG	3
GOBP_ODONTOGENESIS_OF_DENTIN_CONTAINING_TOOTH	GOBP_ODONTOGENESIS_OF_DENTIN_CONTAINING_TOOTH	GOBP_ODONTOGENESIS_OF_DENTIN_CONTAINING_TOOTH	1/171	90/17872	0.579975310252832	0.679089062280604	0.57684540229406	FAM20A	1
[truncated: 312 more rows]
