# Supplementary material for: Single-Cell Sequencing of Lung Macrophages and Monocytes Reveals Novel Therapeutic Targets in COPD
Source: Cells. 2023 Dec 5;12(24):2771. doi: 10.3390/cells12242771 (PMC10741950; doi:10.3390/cells12242771)
Supplement: Supplementary file 1 [file cells-12-02771-s001.zip › Table S8_DISARM_baseline_characteristics.xlsx]

## Sheet: DISARM_baseline_characteristics
Variable	FOR	FOR/BUD	SAL/FLU
n	17	9	11
Age, years	63 (57 - 68)	64 (63 - 73)	66 (61.5 - 71.5)
Male, n (%)	15 (88.24%)	7 (77.78%)	9 (81.82%)
BMI, kg/m2	24.3 (21.93 - 32.1)	21.61 (19.38 - 25.91)	27.9 (23.93 - 33.72)
Current smoker, n (%)	8 (47.06%)	4 (44.44%)	5 (45.45%)
Pack years	45 (24 - 50)	50 (30 - 60)	37.25 (27.25 - 50.75)
Post-BD FEV1, % predicted	66.25 (50 - 72.5)	58 (49 - 76)	82.9 (61.5 - 91)
Post-BD FEV1/FVC, %	58.92 (53.39 - 64.27)	49.49 (47.91 - 57.91)	64.86 (63.08 - 68.68)
ICS at enrollment, n (%)	10 (58.82%)	3 (33.33%)	5 (55.56%)
Supplementry Table S8. Baseline charactereistics of the DISARM subjects. Data presented are median (interquartile range), unless otherise specified. Abbreviateions: BMI, body mass index; BD, bronchodilator; FEV1, forced expiratory volume in one second; FVC, forced vital capacity; ICS, inhaled corticosteroids.
