# Supplementary material for: Single-Cell Sequencing of Lung Macrophages and Monocytes Reveals Novel Therapeutic Targets in COPD
Source: Cells. 2023 Dec 5;12(24):2771. doi: 10.3390/cells12242771 (PMC10741950; doi:10.3390/cells12242771)
Supplement: Supplementary file 1 [file cells-12-02771-s001.zip › Table S9_markers _match.xlsx]

## Sheet: Sheet1
		0 (Alveolar Mac 95%+)						1 (Macrophage 95%+)						2 (classical Monocytes 90%+)						3 (Macrophage 99%+)						4 (Macrophage 99%+)						5 (Macrophage 85%+ Alveolar Mac 15%-)						6 (Macrophage 95%+)						7 (Macrophage 100%)
COPD (%)		84.1				COPD (%)		3.3				COPD (%)		44.4				COPD (%)		5.4				COPD (%)		0.3				COPD (%)		17.8				COPD (%)		71.5				COPD (%)		0.4				COPD (%)
	markers	Log2FC rank	log2FC	adjust p-value	adj p-value rank		markers	Log2FC rank	log2FC	adjust p-value	adj p-value rank		markers	Log2FC rank	log2FC	adjust p-value	adj p-value rank		markers	Log2FC rank	log2FC	adjust p-value	adj p-value rank		markers	Log2FC rank	log2FC	adjust p-value	adj p-value rank		markers	Log2FC rank	log2FC	adjust p-value	adj p-value rank		markers	Log2FC rank	log2FC	adjust p-value	adj p-value rank		markers	Log2FC rank	log2FC	adjust p-value	adj p-value rank		markers
Monocyte_FCN1	FCN1	/				Monocyte_FCN1	FCN1	/	-1.14956	8.87572e-57	22	Monocyte_FCN1	FCN1	6	1.62702	0	1	Monocyte_FCN1	FCN1	/	-0.861281	7.28255e-28		Monocyte_FCN1	FCN1	/	-0.277834	0.00346625		Monocyte_FCN1	FCN1	/	-1.07247	5.80582e-34		Monocyte_FCN1	FCN1	/				Monocyte_FCN1	FCN1	/				Monocyte_FCN1	FCN1
	S100A12	/					S100A12	Pre -filtering					S100A12	3	2.48151	4.53E-312	1		S100A12	/	-1.03173	2.4832e-13			S100A12	/	-0.986635	2.2224e-10			S100A12	/	-1.23883	3.28041e-35			S100A12	/					S100A12	1373	0.133708	3.56756e-15			S100A12
	S100A8	/					S100A8	Pre -filtering					S100A8	1	2.57366	0	1		S100A8	/	-1.42361	5.58213e-26			S100A8	/	-0.673894	2.72847e-11			S100A8	/	-0.900248	0.00235362			S100A8	/					S100A8	38	1.00306	6.65e-56	97		S100A8
	S100A9	/					S100A9	/	-1.0441	1.145e-09	513		S100A9	2	2.56945	0	1		S100A9	/	-1.47811	1.2714e-36			S100A9	/	-0.621879	1.46736e-14			S100A9	/	-1.03761	2.06477e-06			S100A9	/					S100A9	61	0.83133	3.44e-58	90		S100A9
	VCAN	/					VCAN	/	-0.24456	1	1501		VCAN	4	2.17525	0	1		VCAN	/	-0.638765	2.96392e-13			VCAN	/	-0.817949	6.78723e-16			VCAN	/	-0.259823	3.08316e-10			VCAN	/					VCAN	/					VCAN
	LILRA5	/					LILRA5	/	-0.515077	4.57916e-24	155		LILRA5	50	0.793329	9.38e-111	62		LILRA5	/	-0.623184	1.28561e-41			LILRA5	/	-0.642017	6.48804e-36			LILRA5	/	-0.566455	1.065e-22			LILRA5	/					LILRA5	/					LILRA5
Monocyte_IL1B	IL1B	/				Monocyte_IL1B	IL1B	/	-1.69695	1.6833e-88	4	Monocyte_IL1B	IL1B	/	-0.329163	1		Monocyte_IL1B	IL1B	3	1.89514	1.53e-294	4	Monocyte_IL1B	IL1B	/	-0.724233	1.27833e-12		Monocyte_IL1B	IL1B	/	-1.14686	1.56281e-20		Monocyte_IL1B	IL1B	/				Monocyte_IL1B	IL1B	/				Monocyte_IL1B	IL1B
	IL6	/					IL6		0.344225	6.07735e-13	380		IL6	/	-0.527267	8.04831e-18			IL6	18	1.3985	1.49e-133	34		IL6	/	-0.177861	1			IL6	/	-0.0293098	1			IL6	/					IL6	1537	0.117855	1			IL6
	CCL4	/					CCL4	/	-0.832235	1.14455e-15	297		CCL4	/	-0.837319	1.27153e-14			CCL4	19	1.33271	8.61e-89	69		CCL4	/	-0.320197	0.00124709			CCL4	/	-0.438814	1			CCL4	/					CCL4	1176	0.159504	0.0155356			CCL4
	CXCL8	/					CXCL8	/	-1.30794	2.79498e-45	36		CXCL8	/	-1.51134	1.90291e-50			CXCL8	15	1.45382	3.18e-202	11		CXCL8	7	1.23092	1.7e-116	34		CXCL8	/	-1.91665	1.60897e-61			CXCL8	/					CXCL8	26	1.1303	1.33e-77	54		CXCL8
	CXCL3	1443	0.141432	7.76382e-57			CXCL3	/	-0.428412	9.5024e-06	741		CXCL3	/	-1.93459	1.92888e-141			CXCL3	7	1.73191	3.86e-251	6		CXCL3	553	0.25631	1.39613e-37			CXCL3	/	-0.267985	1			CXCL3	/					CXCL3	2884	0.00493038	0.103405			CXCL3
	CCL3	Pre -filtering					CCL3	Pre -filtering					CCL3	Pre -filtering					CCL3	210	0.438458	2.41263e-37	210		CCL3	Pre -filtering					CCL3	Pre -filtering					CCL3	Pre -filtering					CCL3	986	0.190037	1			CCL3
	CCL20	/					CCL20	/	-0.312144	0.641244	1436		CCL20	/	-1.57197	4.48257e-58			CCL20	6	1.78326	2.3e-159	20		CCL20	841	0.172414	4.3495e-13			CCL20	/	-0.247799	1			CCL20	/					CCL20	157	0.569253	4.2e-12	388		CCL20
Monocyte_HSPA6	HSPA6	none				Monocyte_HSPA6	HSPA6	none				Monocyte_HSPA6	HSPA6	none				Monocyte_HSPA6	HSPA6	none				Monocyte_HSPA6	HSPA6	none				Monocyte_HSPA6	HSPA6	none				Monocyte_HSPA6	HSPA6	none				Monocyte_HSPA6	HSPA6	none				Monocyte_HSPA6	HSPA6
	HSPA1A	/					HSPA1A		0.0730586	1			HSPA1A	2105	0.0322354	1			HSPA1A	/	-0.395324	0.0416849			HSPA1A		-0.231465	0.468337			HSPA1A	/	-0.70315	2.26351e-08			HSPA1A	/					HSPA1A	344	0.391956	1			HSPA1A
	HSPA1B	/					HSPA1B		0.0256786	0.113256			HSPA1B	/	-0.0702679	1			HSPA1B	/	-0.0378726	1			HSPA1B		-0.400859	0.269223			HSPA1B	/	-0.701333	6.37919e-07			HSPA1B	/					HSPA1B	/					HSPA1B
	HSPB1	365	0.422997	4.00903e-66			HSPB1	/	-0.273114	1			HSPB1	/	-0.0154053	1			HSPB1	/	-0.447435	2.10171e-14			HSPB1		0.0581538	9.66756e-11			HSPB1	154	0.371499	1.251e-16			HSPB1	/					HSPB1	178	0.531635	2.71e-15	329		HSPB1
	HSPH1	/					HSPH1	/	-0.232783	1			HSPH1	/	-0.0625479	1			HSPH1	/	-0.300796	0.00572835			HSPH1		-0.440213	0.000244602			HSPH1	/	-0.40152	0.0592641			HSPH1	708	0.243137	1			HSPH1	2699	0.0182766	1			HSPH1
Macrophage_CCL2	CCL2	/				Macrophage_CCL2	CCL2	1	1.49205	6.64e-27	81	Macrophage_CCL2	CCL2	/	-1.33669	4.32787e-30		Macrophage_CCL2	CCL2	380	0.31927	6.93132e-31		Macrophage_CCL2	CCL2	23	0.920727	1.65e-13	387	Macrophage_CCL2	CCL2	/	-1.05889	1.77773e-14		Macrophage_CCL2	CCL2	/				Macrophage_CCL2	CCL2	112	0.671378	1.51e-29	240	Macrophage_CCL2	CCL2
	CCL7	Pre -filtering					CCL7	Pre -filtering					CCL7	Pre -filtering					CCL7	Pre -filtering					CCL7	Pre -filtering					CCL7	Pre -filtering					CCL7	Pre -filtering					CCL7	Pre -filtering					CCL7
	CCL8	Pre -filtering					CCL8	Pre -filtering					CCL8	Pre -filtering					CCL8	Pre -filtering					CCL8	Pre -filtering					CCL8	Pre -filtering					CCL8	Pre -filtering					CCL8	Pre -filtering					CCL8
	EMP1	/					EMP1	/	-0.0733969	1			EMP1	/	-0.500934	3.65626e-18			EMP1	143	0.556094	7.52e-41	202		EMP1	57	0.664987	2.04e-60	108		EMP1	Pre -filtering					EMP1	3067	0.00650728	1			EMP1	52	0.892749	9.03e-56	98		EMP1
	DEFB1	259	0.520686	3.16e-52	435		DEFB1	947	0.128538	1			DEFB1	Pre -filtering					DEFB1	Pre -filtering					DEFB1	Pre -filtering					DEFB1	Pre -filtering					DEFB1	Pre -filtering					DEFB1	Pre -filtering					DEFB1
Macrophage_CCL18	CCL18	46	1.07771	3.76e-81	185	Macrophage_CCL18	CCL18	/	-0.910984	1.5457e-06		Macrophage_CCL18	CCL18	/	-2.34904	5.39338e-67		Macrophage_CCL18	CCL18	22	1.25929	3.82e-25	311	Macrophage_CCL18	CCL18	33	0.79313	2.08e-28	291	Macrophage_CCL18	CCL18	Pre -filtering				Macrophage_CCL18	CCL18	/	-1.34019	1.46494e-27		Macrophage_CCL18	CCL18	/				Macrophage_CCL18	CCL18
	CHI3L1	Pre -filtering					CHI3L1	Pre -filtering					CHI3L1	Pre -filtering					CHI3L1	Pre -filtering					CHI3L1	Pre -filtering					CHI3L1	Pre -filtering					CHI3L1	Pre -filtering					CHI3L1	Pre -filtering					CHI3L1
	GPNMB	756	0.258087	1.75826e-76			GPNMB	3042	0.0223965	0.0716531			GPNMB	/	-1.91919	1.04681e-222			GPNMB	26	1.18581	1.72e-141	28		GPNMB	50	0.67368	6.63e-45	178		GPNMB	Pre -filtering					GPNMB	/					GPNMB	/					GPNMB
	C1QA	7	1.88903	0	1		C1QA	/	-0.433742	2.17772e-10			C1QA	/	-1.58906	1.78272e-109			C1QA	/	-0.470321	7.71249e-24			C1QA	/	-0.344406	0.00849128			C1QA	27	0.756515	6.29e-46	71		C1QA	/					C1QA	/					C1QA
	C1QB	6	1.90025	0	1		C1QB	/	-0.106076	0.601277			C1QB	/	-1.64022	5.09615e-103			C1QB	/	-0.570621	6.64576e-27			C1QB	/	-0.325241	0.0869308			C1QB	Pre -filtering					C1QB	/					C1QB	/					C1QB
	CALR	/					CALR	1053	0.118762	1			CALR	/	-0.116348	1			CALR	/	-0.0517265	1			CALR	2582	0.0109938	1			CALR	Pre -filtering					CALR	/					CALR	189	0.509596	1.34e-22	282		CALR
Macrophage_RGS1	RGS1	/				Macrophage_RGS1	RGS1	40	0.546542	1.05589e-13	124	Macrophage_RGS1	RGS1	/	-1.11331	1.16804e-45		Macrophage_RGS1	RGS1	29	1.12659	1.56e-171	16	Macrophage_RGS1	RGS1	/	-0.0181181	1		Macrophage_RGS1	RGS1	/				Macrophage_RGS1	RGS1	2	1.41742	1.55e-97	16	Macrophage_RGS1	RGS1	/				Macrophage_RGS1	RGS1
	GPR183	/					GPR183	141	0.361013	1.71866e-16			GPR183	1490	0.0857641	4.96824e-27			GPR183	141	0.562018	1.09e-79	83		GPR183	692	0.212435	0.000763436			GPR183	/					GPR183	61	0.845465	9.19e-51	80		GPR183	659	0.25813	7.53229e-23			GPR183
	SDS	/					SDS	3	1.08165	4.73e-65	12		SDS	/	-0.436207	6.26776e-10			SDS	410	0.301564	1.90687e-19			SDS	396	0.314903	1.64737e-23			SDS	/					SDS	86	0.750053	4.21e-19	255		SDS	/					SDS
	A2M	Pre -filtering					A2M	Pre -filtering					A2M	Pre -filtering					A2M	Pre -filtering					A2M	907	0.160327	5.6218e-08			A2M	Pre -filtering					A2M	532	0.299863	2.36988e-15			A2M	Pre -filtering					A2M
	CST3	130	0.710103	4.48e-129	124		CST3	/	-0.282356	9.13476e-10			CST3	Pre -filtering					CST3	/	-0.652933	4.92001e-68			CST3	1795	0.0624331	1.9652e-09			CST3	529	0.21272	4.69163e-14			CST3	1229	0.1438	1			CST3	/					CST3
	CST7	Pre -filtering					CST7	Pre -filtering					CST7	Pre -filtering					CST7	579	0.229854	7.58283e-13			CST7	Pre -filtering					CST7	Pre -filtering					CST7	735	0.236477557132761	2.19246e-09			CST7	Pre -filtering					CST7
Macrophage_MT1G	MT1G	/				Macrophage_MT1G	MT1G	/	-1.36728	5.23205e-23		Macrophage_MT1G	MT1G	/	-1.10495	5.154e-18		Macrophage_MT1G	MT1G	2	2.11839	1.34e-143	25	Macrophage_MT1G	MT1G	47	0.682124	1.15e-72	83	Macrophage_MT1G	MT1G	/				Macrophage_MT1G	MT1G	/				Macrophage_MT1G	MT1G	402	0.357016	0.000382357		Macrophage_MT1G	MT1G
	MT1H	Pre -filtering					MT1H	Pre -filtering					MT1H	Pre -filtering					MT1H	16	1.43389	1.25e-83	79		MT1H	Pre -filtering					MT1H	Pre -filtering					MT1H	Pre -filtering					MT1H	none					MT1H
	MT1X	/					MT1X	/	-1.44516	5.8031e-31			MT1X	/	-0.728419	3.48646e-08			MT1X	4	1.88602	3.37e-191	14		MT1X	147	0.482794	1			MT1X	/					MT1X	/					MT1X	42	0.966502	2.44e-21	289		MT1X
	MT1M	Pre -filtering					MT1M	Pre -filtering					MT1M	Pre -filtering					MT1M	21	1.26174	4.87e-86	75		MT1M	Pre -filtering					MT1M	Pre -filtering					MT1M	Pre -filtering					MT1M	none					MT1M
	MT1F	/					MT1F	/	-0.340041	0.000222669			MT1F	/	-0.355759	8.49709e-05			MT1F	23	1.22148	5.01e-128	38		MT1F	/	-0.172264	1			MT1F	/					MT1F	/					MT1F	274	0.437149	0.000208876			MT1F
Alveolar_Mac_FABP4mid	FABP4(mid)	1	3.01568	0	1	Alveolar_Mac_FABP4mid	FABP4(mid)	/	-0.31498	2.49976e-18		Alveolar_Mac_FABP4mid	FABP4(mid)	/	-2.24243	6.18254e-49		Alveolar_Mac_FABP4mid	FABP4(mid)	/	-1.9222	5.35741e-42		Alveolar_Mac_FABP4mid	FABP4(mid)	/	-1.66006	1.73279e-36		Alveolar_Mac_FABP4mid	FABP4(mid)	/				Alveolar_Mac_FABP4mid	FABP4(mid)	/				Alveolar_Mac_FABP4mid	FABP4(mid)	/				Alveolar_Mac_FABP4mid	FABP4(mid)
monocyte-derived	PPARG(mid)	95	0.837595	7.05e-111	154	monocyte-derived	PPARG(mid)	482	0.200551	7.09606e-10		monocyte-derived	PPARG(mid)	/	-1.1419	2.15647e-79		monocyte-derived	PPARG(mid)	/	-0.640272	1.17107e-23		monocyte-derived	PPARG(mid)	68	0.619075	1.75e-52	139	monocyte-derived	PPARG(mid)	32	0.706095	1.3e-56	54	monocyte-derived	PPARG(mid)	/				monocyte-derived	PPARG(mid)	/				monocyte-derived	PPARG(mid)
	RBP4(mid)	35	1.1673	5.93e-209	54		RBP4(mid)	Pre -filtering					RBP4(mid)	Pre -filtering					RBP4(mid)	Pre -filtering					RBP4(mid)	Pre -filtering					RBP4(mid)	Pre -filtering					RBP4(mid)	Pre -filtering					RBP4(mid)	Pre -filtering					RBP4(mid)
	TGM2	80	0.872918	3.69e-78	266		TGM2	/	-0.151788	1			TGM2	/	-0.297668	1.02174e-13			TGM2	/	-0.133513	1			TGM2	/	-0.18113	0.170128			TGM2	/					TGM2	/					TGM2	/					TGM2
Alveolar_Mac_FABP4high	FABP4(high)	1	3.01568	0	1	Alveolar_Mac_FABP4high	FABP4(high)	/	-0.31498	2.49976e-18		Alveolar_Mac_FABP4high	FABP4(high)	/	-2.24243	6.18254e-49		Alveolar_Mac_FABP4high	FABP4(high)	/	-1.9222	5.35741e-42		Alveolar_Mac_FABP4high	FABP4(high)	/	-1.66006	1.73279e-36		Alveolar_Mac_FABP4high	FABP4(high)	/				Alveolar_Mac_FABP4high	FABP4(high)	/				Alveolar_Mac_FABP4high	FABP4(high)	/				Alveolar_Mac_FABP4high	FABP4(high)
tissue-resident	PPARG(high)	95	0.837595	7.05e-111	154	tissue-resident	PPARG(high)	482	0.200551	7.09606e-10		tissue-resident	PPARG(high)	/	-1.1419	2.15647e-79		tissue-resident	PPARG(high)	/	-0.640272	1.17107e-23		tissue-resident	PPARG(high)	68	0.619075	1.75e-52	139	tissue-resident	PPARG(high)	32	0.706095	1.3e-56	54	tissue-resident	PPARG(high)	/				tissue-resident	PPARG(high)	/				tissue-resident	PPARG(high)
	RBP4(high)	35	1.1673	5.93e-209	54		RBP4(high)	Pre -filtering					RBP4(high)	Pre -filtering					RBP4(high)	Pre -filtering					RBP4(high)	Pre -filtering					RBP4(high)	Pre -filtering					RBP4(high)	Pre -filtering					RBP4(high)	Pre -filtering					RBP4(high)
	NMB	524	0.335362	4.07792e-22	1053		NMB	Pre -filtering					NMB	Pre -filtering					NMB	Pre -filtering					NMB	Pre -filtering					NMB	Pre -filtering					NMB	Pre -filtering					NMB	Pre -filtering					NMB
	CFD	78	0.873958	3.69e-78	266		CFD	/	-0.665787	4.94223e-30			CFD	/	-0.176138	5.90929e-07			CFD	/	-0.405837	5.35907e-10			CFD	/	-0.114929	2.97769e-05			CFD	1315	0.121537	4.6374e-06			CFD	/					CFD	/					CFD
	PLIN2	/	-0.324705	6.00742e-07	1955		PLIN2	328	0.250188	1.47657e-14			PLIN2	/	-1.31024	1.50668e-110			PLIN2	45	0.97091	2.35e-113	49		PLIN2	122	0.520666	2.75e-51	146		PLIN2	/					PLIN2	/					PLIN2	1034	0.182775	0.0446374			PLIN2
												Enrichment	IL1RN	/	-0.625828	4.85541e-20																				Enrichment	CCL13	Pre -filtering
																																					CCL18	/	-1.34019	1.46494e-27
																																					PLD4	Pre -filtering
																																					FOLR2	214	0.505967	4.16684e-21
																																					AXL	20	1.1135	2.50775e-68
There are some denotes in sheet2																																					MERTK	63	0.83331	2.90048e-35
[truncated: 39 more columns]

## Sheet: Sheet2
/ : means the Log2FC is negative
Pre -filtering: means gene was pre-filtering by Seurat since it is rarely detected in any group of cells, or the average expression of it is at similar levels, which is unlikely to be expressed in differences.
none: means do not exist in the DEG list
