# Supplementary material for: Single-Cell Sequencing of Lung Macrophages and Monocytes Reveals Novel Therapeutic Targets in COPD
Source: Cells. 2023 Dec 5;12(24):2771. doi: 10.3390/cells12242771 (PMC10741950; doi:10.3390/cells12242771)
Supplement: Supplementary file 1 [file cells-12-02771-s001.zip › Table S10_cluster_subject.xlsx]

## Sheet: Sheet1
	Cluster 0	Cluster 1	Cluster 2	Cluster 3	Cluster 4	Cluster 5	Cluster 6	Cluster 7	Cluster 8	Cluster 9	Cluster 10	Cluster 11	Cluster 12	Cluster 13	Cluster 14	Cluster 15
001C	0.00195312	0.0129741	0.0944625	0.00112994	0	0.0276565	0.00619195	0	0.00235294	0.00869565	0	0	0	0	0.0181818	0
002C	0	0.00998004	0.00108578	0	0	0.00873362	0.00154799	0	0	0.00434783	0	0	0	0	0.00909091	0
003C	0.00390625	0.0219561	0	0	0.0223097	0.014556	0.00773994	0	0	0	0.0047619	0.494624	0	0	0.0181818	0
022C-a	0.00195312	0.0568862	0.0390879	0	0.00131234	0.00873362	0.0154799	0	0	0	0	0	0.0241935	0	0.00909091	0
022C-b	0.00488281	0.0548902	0.0564604	0	0	0.00727802	0.0170279	0	0.00705882	0.00434783	0	0	0.00806452	0	0.00909091	0
034C	0	0.00598802	0.00108578	0.00225989	0.00393701	0.00436681	0.00309598	0.00200401	0	0.0130435	0	0	0	0.0677966	0	0.01
052CO-a	0.00195312	0.000998004	0.053203	0	0	0	0.00773994	0	0.0235294	0	0.0238095	0	0	0	0	0
056CO	0.00976562	0.00399202	0.0173724	0.00225989	0	0.0116448	0.0572755	0	0.0352941	0.0130435	0.133333	0	0.0322581	0	0.00909091	0
065C	0.00488281	0.10978	0.0162866	0.00112994	0	0.00436681	0.00928793	0	0	0	0.0285714	0	0	0.0169492	0.0272727	0
081C	0	0.00598802	0	0	0.00131234	0.0014556	0.00154799	0.00400802	0	0.00434783	0	0.016129	0	0.0169492	0	0
084C	0	0	0.00434311	0	0.00131234	0.00291121	0.00464396	0	0.00235294	0	0.00952381	0.0215054	0	0	0.00909091	0
092C	0.00585938	0.0219561	0.0141151	0	0	0.308588	0.00309598	0	0.00941176	0	0	0	0	0	0.0272727	0
098C-a	0.00488281	0.0808383	0.019544	0	0	0.00436681	0.0185759	0	0	0.00434783	0	0	0.266129	0	0.0272727	0
098C-b	0.00195312	0.0978044	0.0119435	0	0.00131234	0.00582242	0.0123839	0	0	0	0.0047619	0	0.540323	0	0.0636364	0
133C-a	0.0273438	0.00299401	0	0	0.947507	0.0014556	0.00464396	0	0	0.0130435	0	0.333333	0	0	0	0
137C	0	0.00499002	0.0314875	0	0	0.0014556	0	0	0	0.00869565	0	0	0.016129	0	0.00909091	0
137C-a	0.00488281	0.0798403	0.019544	0	0.00524934	0.00291121	0.00619195	0.00601202	0	0	0.0047619	0.00537634	0.016129	0	0	0
137C-b	0.00488281	0.0938124	0.0217155	0	0.00131234	0.0014556	0.00619195	0	0	0.00434783	0.0047619	0.0107527	0	0	0	0
152CO-a	0.441406	0.00199601	0	0.0158192	0	0.0334789	0.0325077	0	0.00235294	0	0	0	0	0	0	0
153CO-a	0.078125	0	0	0	0	0.0014556	0.0139319	0	0	0	0	0	0	0	0.00909091	0
153CO-b	0.0302734	0.00299401	0	0.00338983	0	0.00291121	0.0185759	0	0	0.00434783	0	0	0.00806452	0	0	0
160C	0	0.00399202	0.0119435	0.00112994	0	0.250364	0.0510836	0	0.00470588	0	0	0.0107527	0	0	0.00909091	0
178CO	0.128906	0.000998004	0.0238871	0.00677966	0	0.0276565	0.0325077	0	0.08	0	0	0	0	0	0.0272727	0
184CO-a	0.0126953	0.000998004	0.0553746	0.00451977	0	0.0131004	0.0990712	0	0.209412	0	0.00952381	0	0	0	0	0.01
184CO-b	0.0292969	0	0.0217155	0.00112994	0	0.0174672	0.0619195	0	0.103529	0	0	0	0	0	0	0.01
186CO-b	0.00488281	0	0.0228013	0.00225989	0	0.0116448	0.0170279	0	0.00470588	0	0	0	0	0	0	0
192C-a	0.000976562	0.0249501	0.00108578	0	0.00131234	0	0.00309598	0.00400802	0	0.00434783	0	0	0.00806452	0.779661	0.00909091	0
192CO	0.00195312	0	0.0162866	0	0	0	0.00309598	0	0.00470588	0	0	0	0	0	0	0
192CO-a	0.000976562	0	0.0130293	0	0	0.0014556	0.0170279	0	0.0117647	0	0	0	0	0	0.00909091	0
192CO-b	0.00976562	0.000998004	0.00542888	0.00112994	0	0.00436681	0.0154799	0	0.0329412	0	0	0	0	0	0.00909091	0
193CO-a	0.0136719	0.000998004	0.0162866	0.00112994	0	0.0131004	0.0139319	0.00200401	0.0988235	0	0	0	0.00806452	0	0	0
193CO-b	0.0117188	0.000998004	0.0271444	0	0	0.00582242	0.0325077	0	0.204706	0	0	0	0	0	0	0.01
194CO-a	0	0	0.0260586	0.00112994	0	0.00582242	0.0464396	0	0.0517647	0	0	0	0	0	0	0
207CO	0.00195312	0.00698603	0.0228013	0.00677966	0	0.0101892	0.0603715	0	0.0376471	0	0.0047619	0	0	0	0.0272727	0
208C	0	0.0339321	0.00434311	0	0	0.00291121	0.0108359	0	0.00235294	0	0.0047619	0.00537634	0	0	0.00909091	0
217CO-a	0	0	0.00977199	0.00225989	0	0	0.00773994	0.00200401	0.0117647	0	0	0	0	0	0.00909091	0.94
218C-a	0.000976562	0.00199601	0.00217155	0.00225989	0	0.0014556	0.00154799	0.158317	0	0	0	0	0	0	0	0
218C-b	0.00195312	0.000998004	0	0.00338983	0	0	0	0.138277	0	0.00434783	0	0.00537634	0	0	0	0
219C-a	0.00390625	0	0.00434311	0.00903955	0	0.0014556	0	0.38477	0	0.00869565	0	0	0	0	0	0
219C-b	0.00292969	0.00299401	0.00108578	0.00225989	0	0	0	0.288577	0	0	0	0	0	0	0	0
222C	0.000976562	0.0369261	0.0390879	0	0	0.00436681	0.0170279	0	0.00470588	0	0	0.00537634	0	0	0	0
226C-a	0.00878906	0.00399202	0.00434311	0.430508	0.00131234	0.00436681	0.00464396	0.00200401	0	0.46087	0	0	0	0	0	0
226C-b	0.0175781	0.00698603	0.00542888	0.467797	0	0.0101892	0.00154799	0.00601202	0	0.421739	0	0	0.00806452	0	0	0
235CO	0.0605469	0.00199601	0.00868621	0.00338983	0.00262467	0.00873362	0.0170279	0	0.0141176	0	0	0	0.00806452	0	0.00909091	0
237CO	0.000976562	0.00499002	0.00434311	0.00112994	0	0.0014556	0.137771	0	0.00941176	0	0.438095	0	0	0	0.0272727	0
238CO	0	0	0.00542888	0.00112994	0	0	0.00928793	0	0.00470588	0	0.00952381	0	0	0	0	0
23CO	0.000976562	0.00199601	0.0705755	0	0	0.00727802	0.00928793	0	0.00470588	0	0	0	0	0	0	0
244C	0	0	0	0	0	0	0	0	0	0.00434783	0	0	0	0	0	0
253C	0	0.00399202	0.0206298	0	0	0	0	0	0.00705882	0	0	0.00537634	0	0	0	0
296C	0.00488281	0.010978	0.107492	0	0	0.014556	0.0448916	0	0.00235294	0	0.0047619	0	0.0241935	0	0.136364	0
388C	0.0283203	0.00998004	0.00108578	0.0124294	0.00131234	0.00436681	0.00464396	0	0	0	0	0	0.0241935	0.0423729	0	0
396C	0.00390625	0.00499002	0.00108578	0	0	0.0160116	0.00154799	0	0	0	0	0	0	0	0.0818182	0
439C	0.000976562	0.0419162	0.00217155	0	0	0.00291121	0.00154799	0	0	0	0.190476	0	0	0.0423729	0.272727	0
439C-b	0.00292969	0.0988024	0.00651466	0.00451977	0	0.0480349	0.00309598	0	0.00470588	0	0.109524	0	0	0.0169492	0.0636364	0
454C	0	0.00798403	0.0119435	0.00677966	0	0.0014556	0.0139319	0.00200401	0.00705882	0	0.0142857	0	0	0	0	0
465C	0.0117188	0.00199601	0	0	0.00393701	0.0101892	0.00154799	0	0	0	0	0.0430108	0.00806452	0	0.0272727	0
483C	0.000976562	0.00299401	0	0	0.00393701	0.0436681	0.00154799	0	0	0	0	0.0430108	0	0	0.0272727	0
484C	0	0.00199601	0	0.00112994	0	0	0.00464396	0	0	0.0130435	0	0	0	0	0	0.02
8CO	0.000976562	0.00199601	0.0238871	0	0	0	0.00464396	0	0	0	0	0	0	0	0	0
92C	0	0.00399202	0	0	0	0	0	0	0	0	0	0	0	0.0169492	0	0
