# Supplementary figures and images for: Single-Cell Sequencing of Lung Macrophages and Monocytes Reveals Novel Therapeutic Targets in COPD
Source: MDPI journal article supplement (doi:10.3390/cells12242771), 2023-12-05

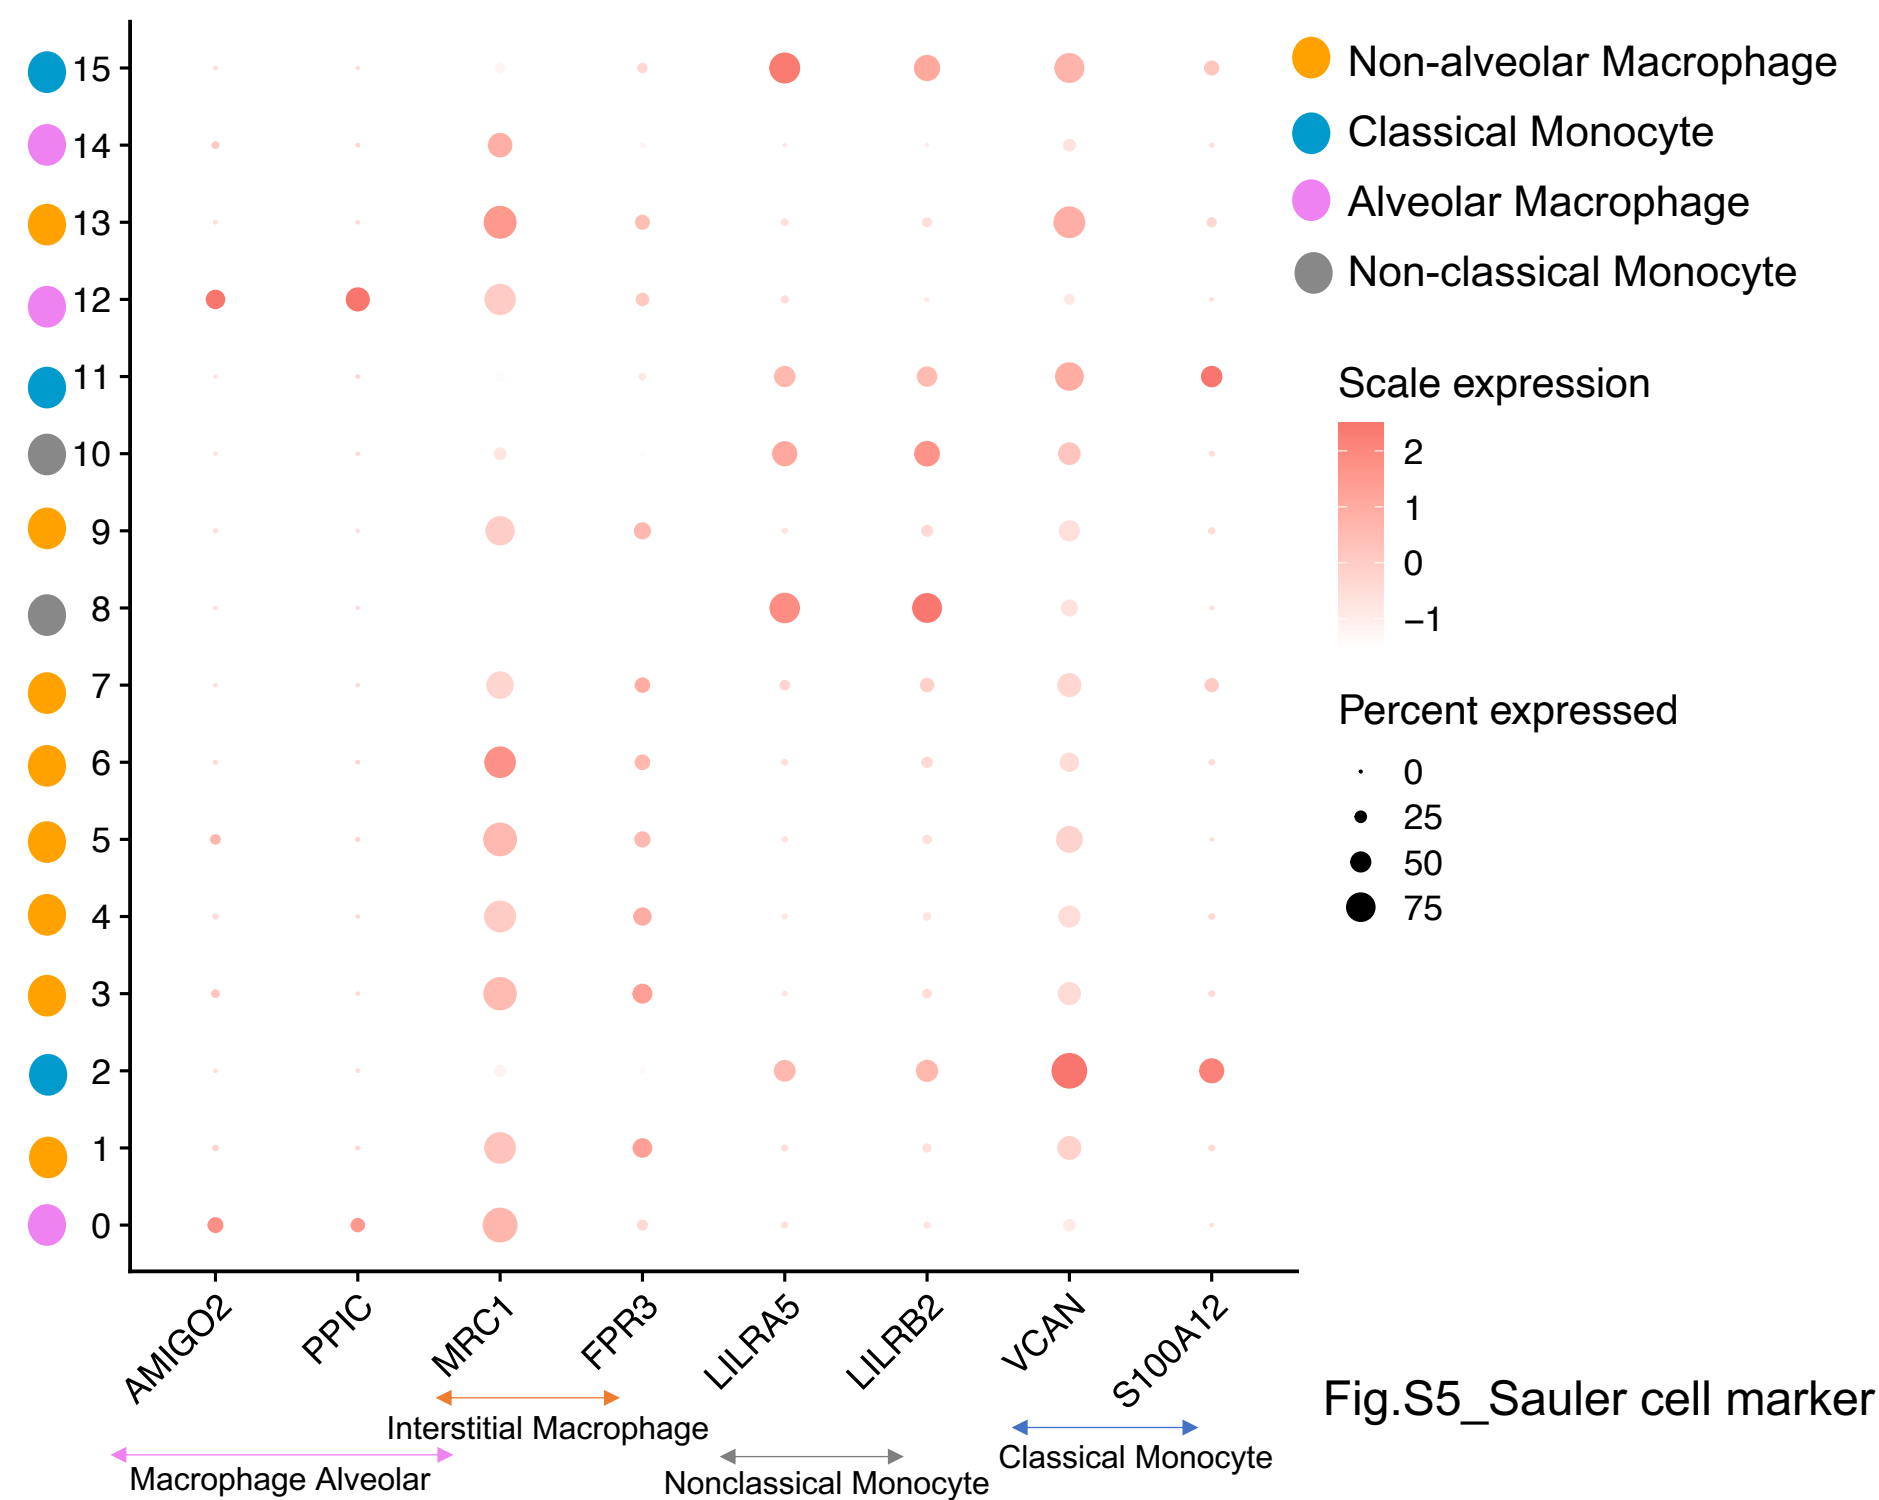

Fig.S5\_Sauler cell marker

Supplement: s1 [file s1]

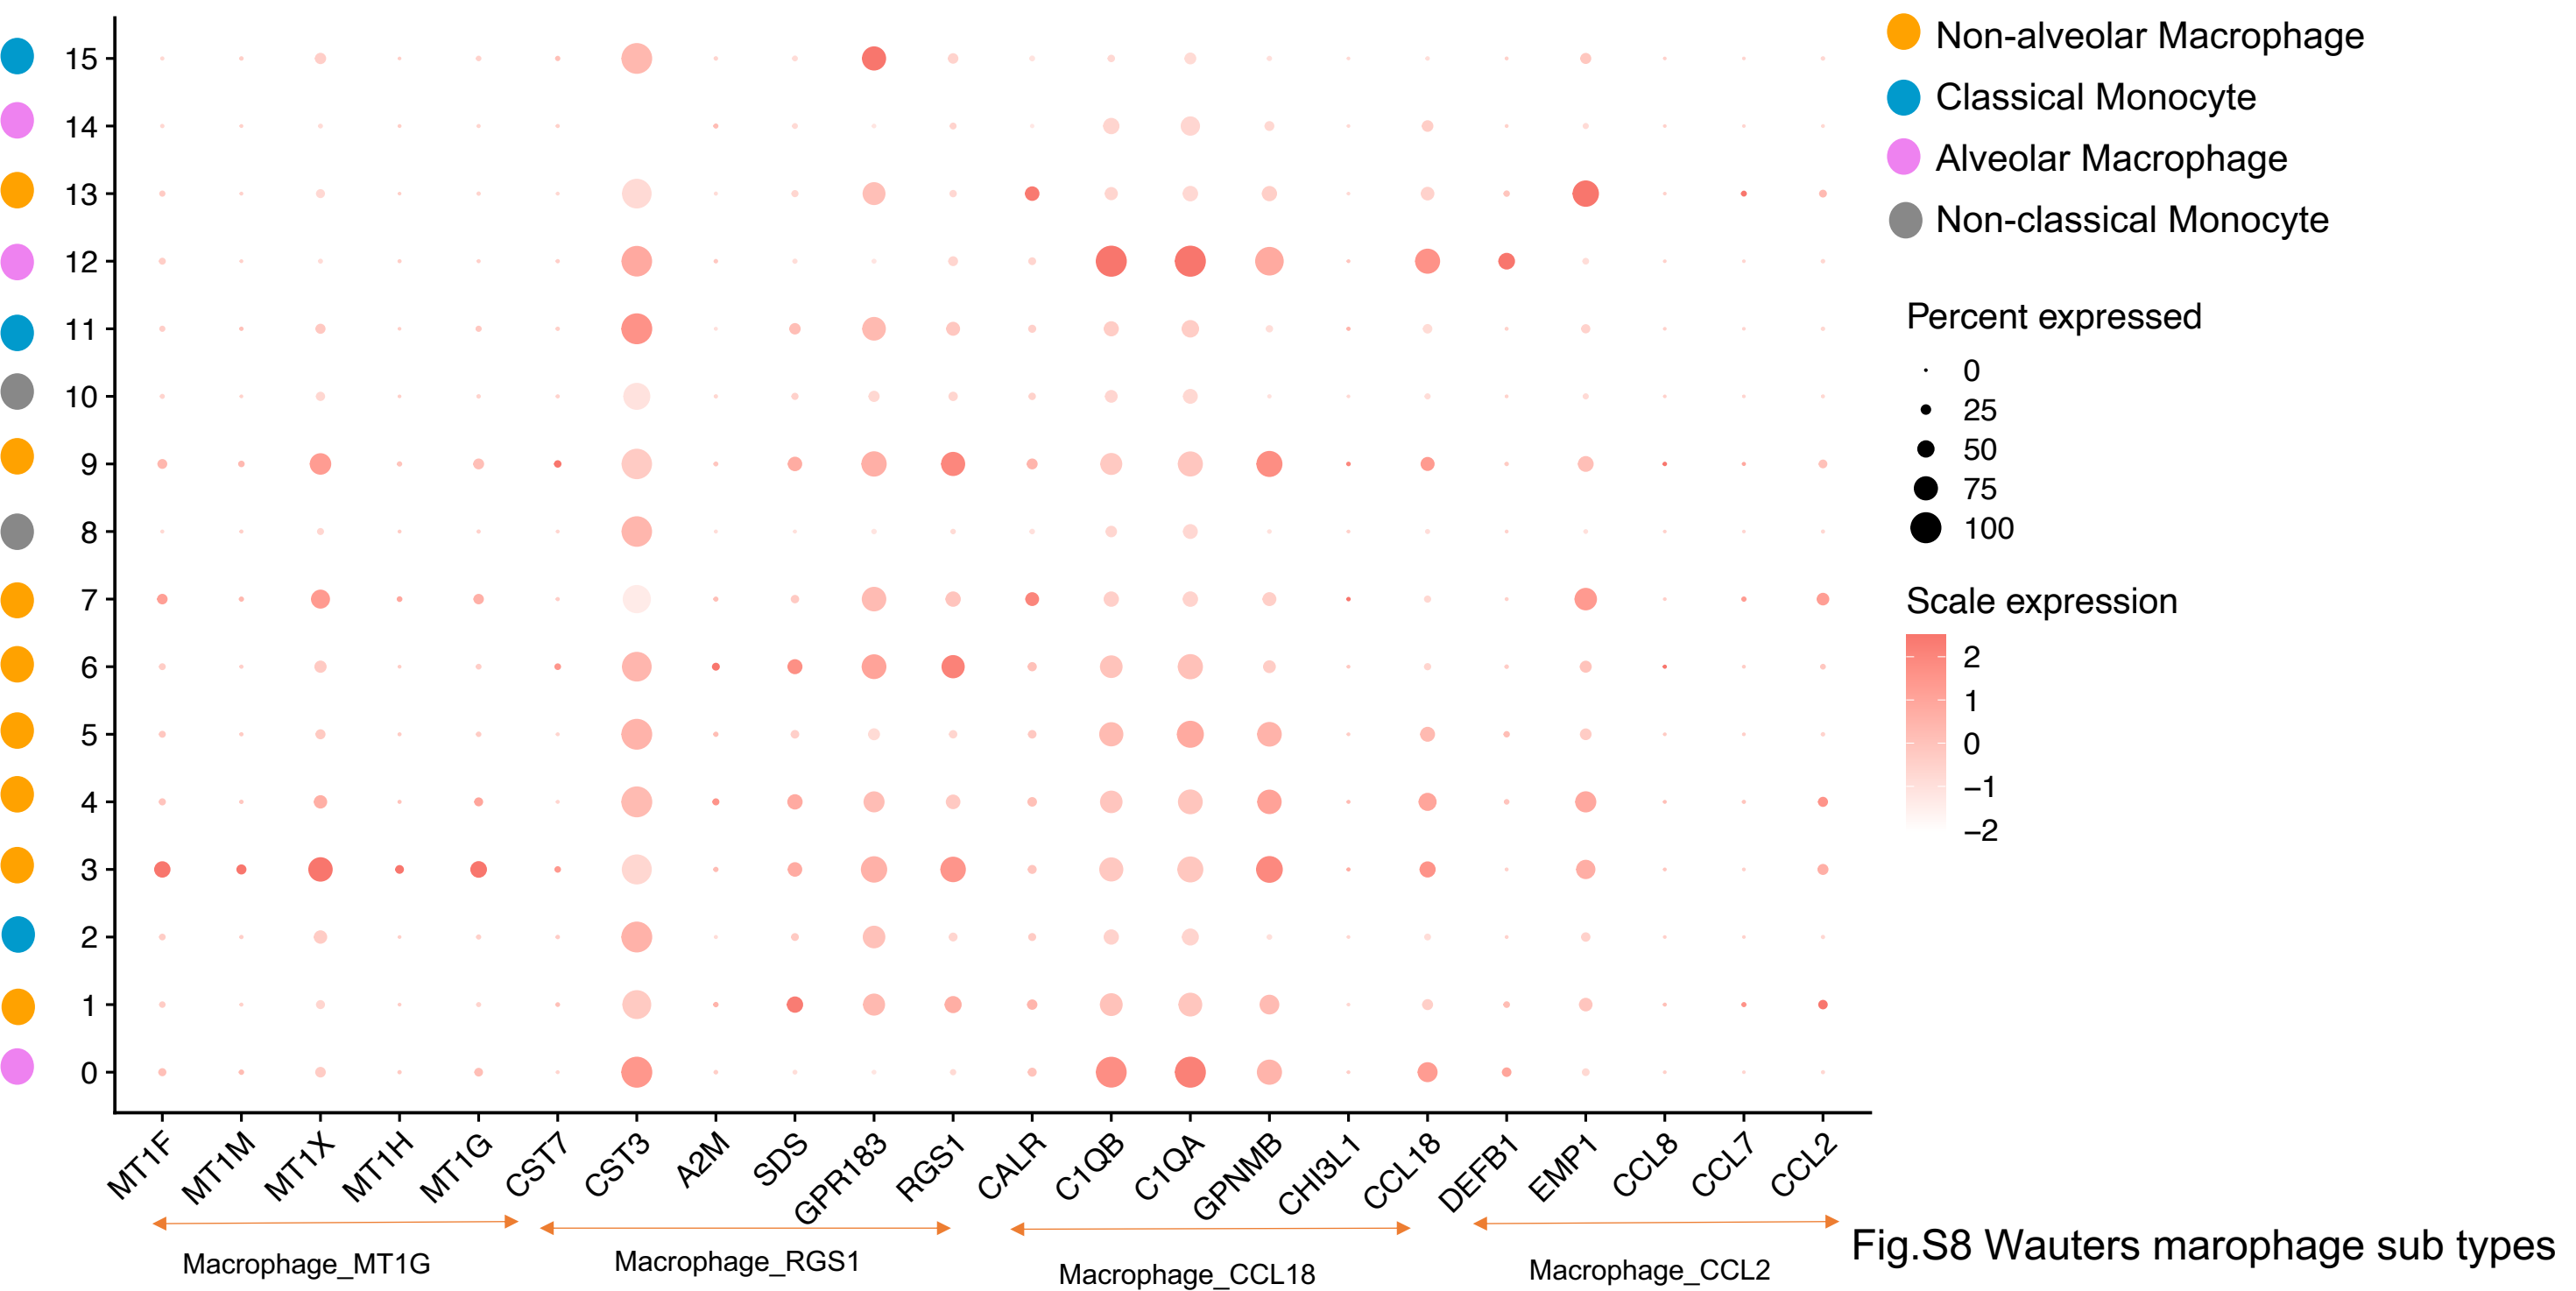

Supplement: s1 [file s1]

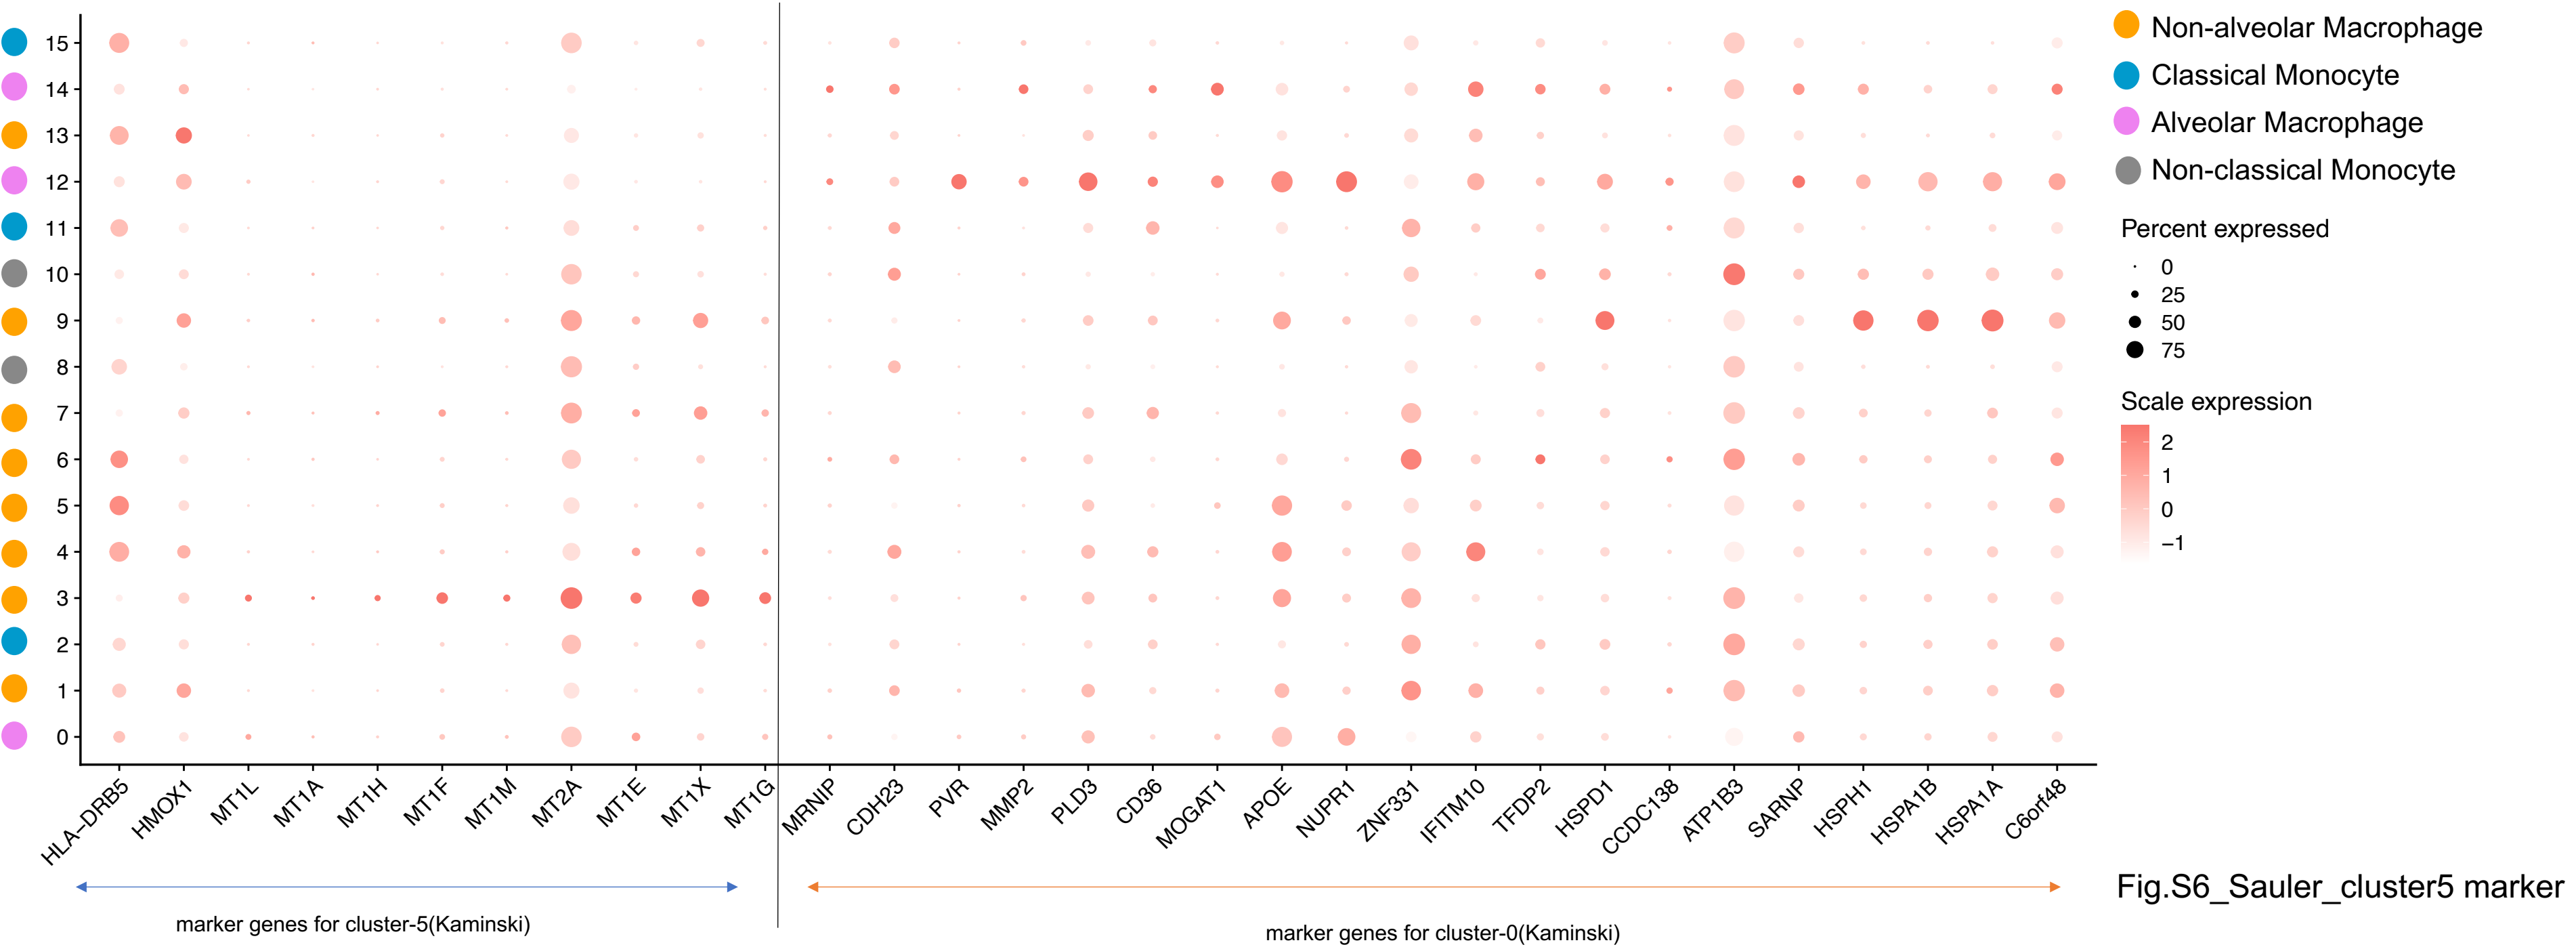

Supplement: s1 [file s1]

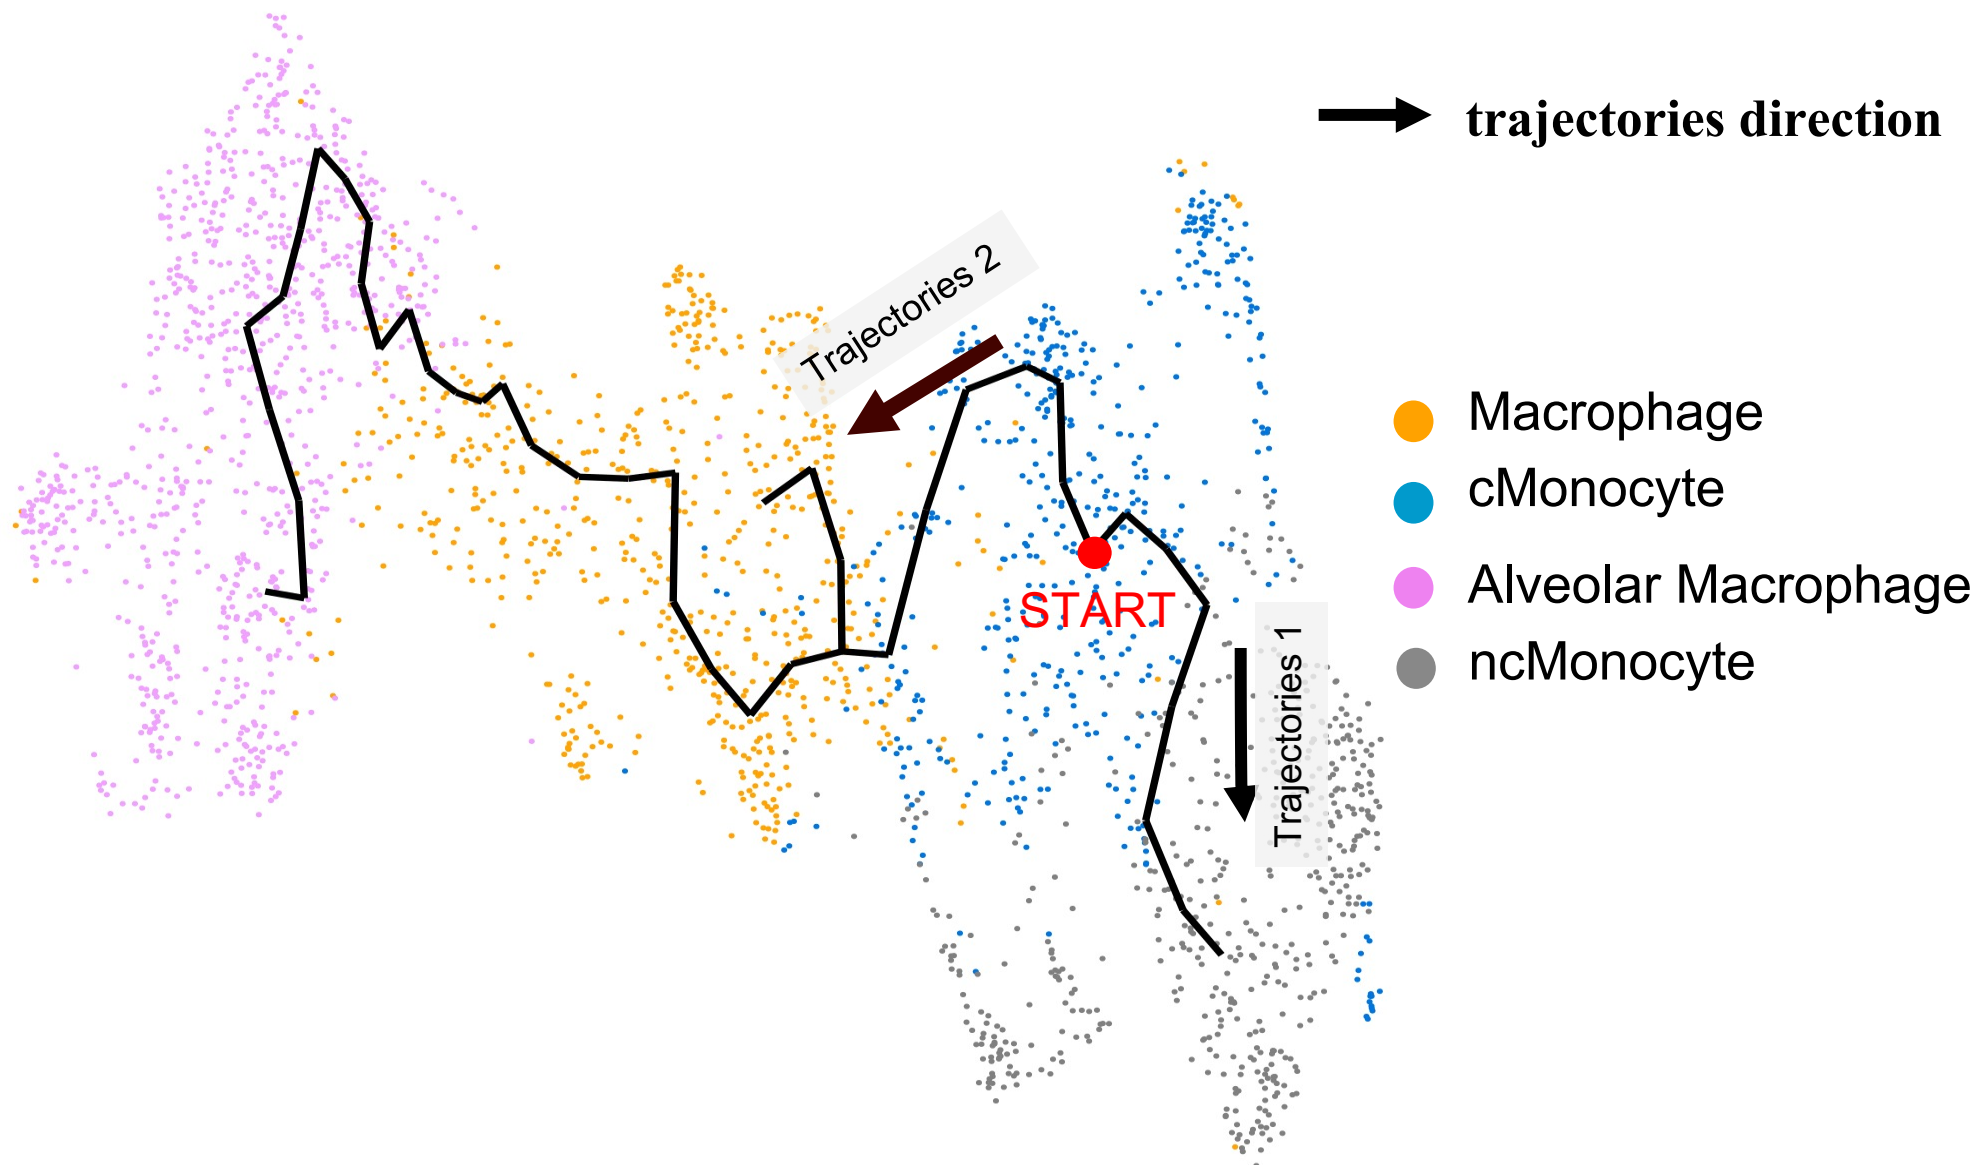

Fig.S7\_ pseudo-time analysis only on COPD

Supplement: s1 [file s1]

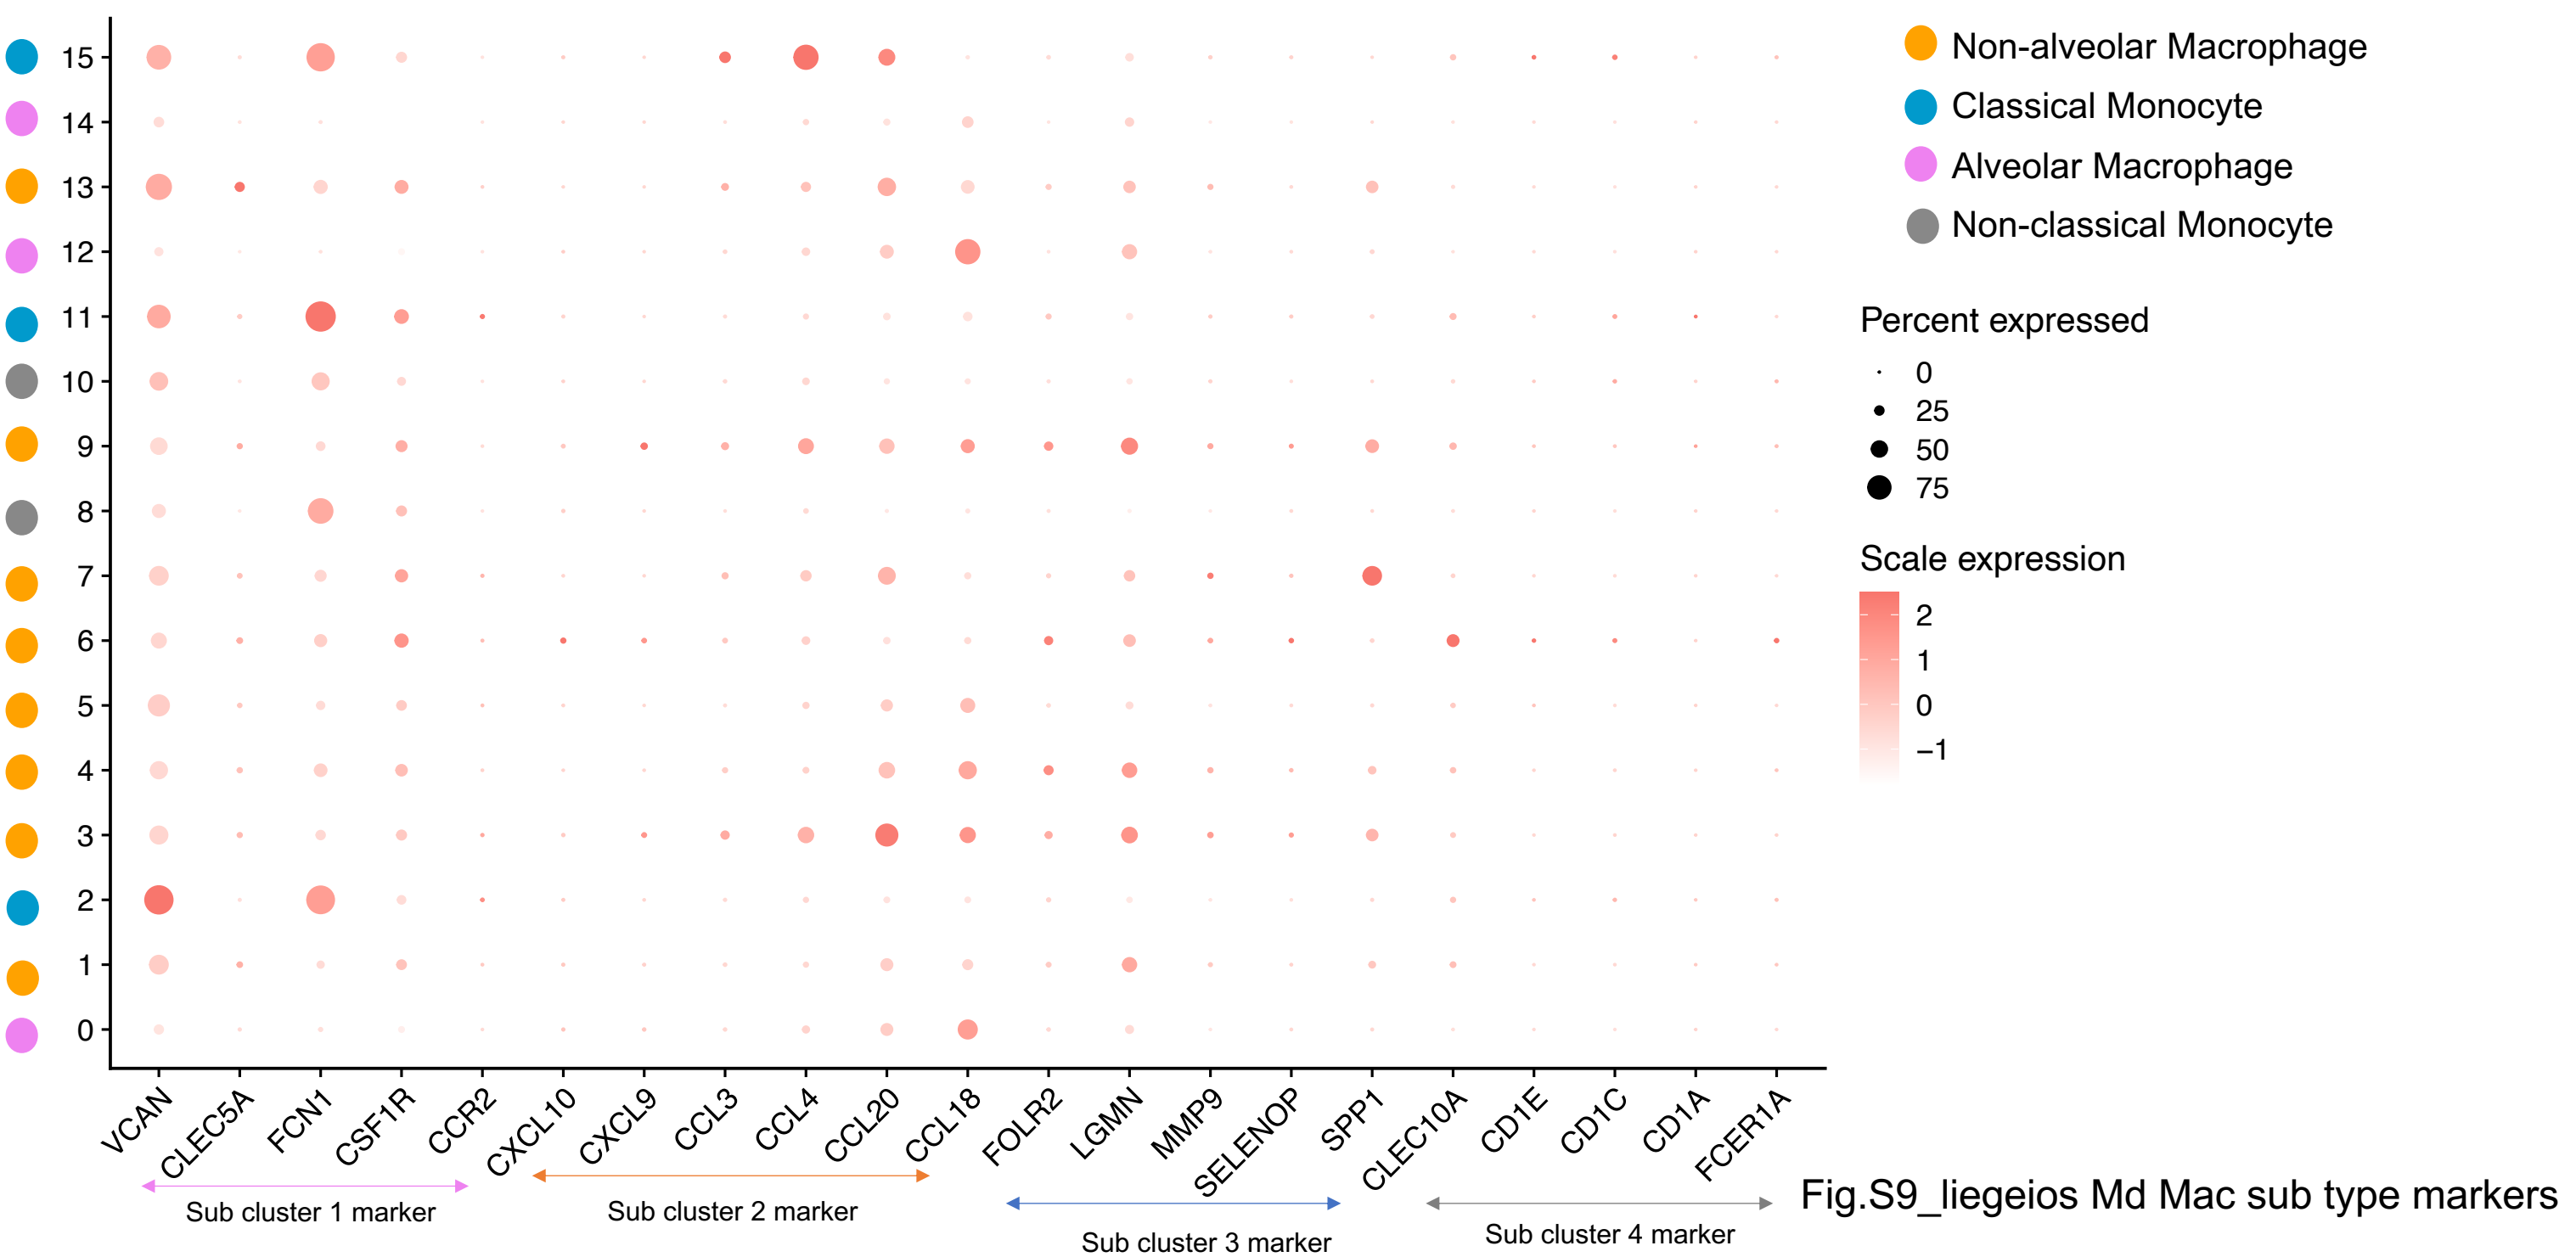

Supplement: s1 [file s1]
